# Supplementary material for: Tongue immune compartment analysis reveals spatial macrophage heterogeneity
Source: eLife. 2022 Jun 24;11:e77490. doi: 10.7554/eLife.77490 (PMC9232218; doi:10.7554/eLife.77490)
Supplement: Figure 1—source data 1. — Listed are the marker genes for each cluster of the scRNA-seq experiments 1–4 together with the respective test statistics. Each cluster can be found in separated tabs. As test method we used MAST, the log2fc threshold was set to 0.25 and a Bonferroni mutiple testing correction was applied. We only considered genes that were expressed in at least 20% of the cells in at least one of the groups. Note that cluster 11 is not represented due to low cell numbers and cluster 16 could only be detected in experiment 3 (LPS). These data sets belong to Figures 1, 4 and 6. [file elife-77490-fig1-data1.xlsx]

## Sheet: C0
	Exp_1_(S005)_p_val	S005_avg_log2FC	S005_pct.1	S005_pct.2	S005_p_val_adj	Exp_2_(SP024)_p_val	SP024_avg_log2FC	SP024_pct.1	SP024_pct.2	SP024_p_val_adj	Exp_3_(LPS)_p_val	LPS_avg_log2FC	LPS_pct.1	LPS_pct.2	LPS_p_val_adj	Exp_4_(S006)_p_val	S006_avg_log2FC	S006_pct.1	S006_pct.2	S006_p_val_adj	max_pval	minimump_p_val
Apoe	0	2.75641	0.988	0.408	0	3.3188e-145	1.18641	0.863	0.612	1.15468e-140	0	1.03263	0.952	0.571	0	0	1.19887	0.999	0.934	0	3.3188e-145	0
App	0	1.42675	0.846	0.446	0	7.6267e-58	0.79054	0.405	0.322	2.65348e-53	2.44209e-88	0.447734	0.843	0.741	8.4965e-84	0	0.697184	0.88	0.613	0	7.6267e-58	0
C1qa	0	2.47842	0.997	0.333	0	0	1.87991	0.951	0.415	0	0	1.15228	0.979	0.6	0	0	1.11778	0.998	0.721	0	0	0
C1qb	0	2.16432	0.99	0.338	0	5.00391e-251	1.4589	0.926	0.469	1.74096e-246	0	0.879126	0.973	0.644	0	0	1.07939	0.999	0.745	0	5.00391e-251	0
C1qc	0	2.55174	0.992	0.295	0	0	1.89269	0.912	0.367	0	0	1.13234	0.963	0.555	0	0	1.18038	0.999	0.698	0	0	0
C3ar1	0	1.65825	0.808	0.199	0	4.59942e-64	1.16774	0.293	0.124	1.60023e-59	2.76021e-40	0.256633	0.56	0.396	9.60332e-36	0	0.566712	0.916	0.605	0	2.76021e-40	0
C5ar1	0	1.57165	0.812	0.249	0	1.57828e-110	1.4266	0.481	0.169	5.49116e-106	0	1.50429	0.882	0.435	0	0	0.566337	0.933	0.668	0	1.57828e-110	0
Cbr2	0	2.74677	0.902	0.133	0	9.59219e-291	2.3936	0.456	0.041	3.33731e-286	0	1.73841	0.656	0.142	0	0	1.52727	0.822	0.354	0	9.59219e-291	0
Cd163	0	2.62397	0.786	0.175	0	6.30627e-170	1.86128	0.455	0.152	2.19408e-165	0	2.27169	0.745	0.224	0	0	1.42977	0.786	0.354	0	6.30627e-170	0
Cfh	0	2.92064	0.895	0.19	0	2.40833e-260	2.30716	0.5	0.089	8.37904e-256	0	2.01009	0.81	0.267	0	0	1.37072	0.954	0.589	0	2.40833e-260	0
Cltc	0	1.6357	0.909	0.613	0	5.52773e-46	0.761607	0.451	0.336	1.92321e-41	1.75038e-84	0.422856	0.762	0.753	6.08991e-80	0	0.719153	0.966	0.773	0	5.52773e-46	0
Csf1r	0	1.99587	0.934	0.418	0	1.37841e-105	1.15026	0.581	0.363	4.79576e-101	8.98081e-70	0.439608	0.776	0.597	3.1246e-65	0	0.922713	0.99	0.733	0	8.98081e-70	0
Ctsb	0	2.31244	0.991	0.678	0	2.26179e-95	0.996933	0.712	0.541	7.86923e-91	1.17644e-286	0.801377	0.978	0.854	4.09308e-282	0	0.903715	0.997	0.851	0	2.26179e-95	0
Ctsc	0	2.02704	0.965	0.578	0	1.70988e-94	0.990864	0.702	0.501	5.94902e-90	2.93656e-34	0.272018	0.8	0.693	1.02169e-29	0	0.835754	0.994	0.852	0	2.93656e-34	0
Dab2	0	2.62535	0.929	0.244	0	1.28305e-138	1.52333	0.486	0.212	4.46399e-134	0	1.57828	0.828	0.437	0	0	1.20654	0.995	0.673	0	1.28305e-138	0
F13a1	0	3.1088	0.952	0.227	0	4.87274e-232	2.06853	0.563	0.163	1.69533e-227	0	1.83072	0.915	0.397	0	0	1.74104	0.986	0.606	0	4.87274e-232	0
Fcgrt	0	2.39082	0.89	0.276	0	8.00243e-150	1.72415	0.382	0.114	2.7842e-145	4.28366e-106	0.589401	0.318	0.171	1.49037e-101	0	1.57501	0.987	0.66	0	4.28366e-106	0
Folr2	0	3.35284	0.909	0.119	0	7.64962e-282	2.38947	0.418	0.029	2.66146e-277	0	1.7195	0.609	0.114	0	0	1.76875	0.922	0.437	0	7.64962e-282	0
Frmd4b	0	1.76668	0.819	0.278	0	5.36629e-61	1.11498	0.254	0.098	1.86704e-56	0	1.10331	0.786	0.525	0	0	0.659443	0.779	0.479	0	5.36629e-61	0
Fxyd2	0	2.45812	0.846	0.16	0	2.79761e-154	1.93741	0.368	0.072	9.73344e-150	4.55302e-183	0.89644	0.436	0.163	1.58409e-178	0	0.767062	0.55	0.259	0	2.79761e-154	0
Gas6	0	2.68565	0.873	0.109	0	1.65258e-236	2.15333	0.366	0.022	5.74967e-232	4.40171e-142	0.580326	0.251	0.052	1.53144e-137	0	1.40835	0.962	0.491	0	4.40171e-142	0
Glul	0	1.96348	0.88	0.405	0	3.91187e-137	1.56507	0.522	0.23	1.36102e-132	0	1.27572	0.878	0.633	0	0	0.749349	0.935	0.677	0	3.91187e-137	0
Grn	0	1.98583	0.969	0.562	0	1.0626e-84	0.985394	0.517	0.391	3.69699e-80	6.77739e-213	0.989688	0.895	0.731	2.35799e-208	0	0.898043	0.988	0.795	0	1.0626e-84	0
Hmox1	0	1.95641	0.767	0.224	0	4.03467e-22	0.703729	0.327	0.241	1.40374e-17	0	1.24402	0.824	0.505	4.08483e-308	0	1.30582	0.953	0.642	0	4.03467e-22	0
Igfbp4	0	2.23091	0.827	0.148	0	1.23889e-104	1.49749	0.259	0.04	4.31034e-100	3.33005e-66	0.408396	0.228	0.085	1.15859e-61	0	1.22078	0.988	0.626	0	3.33005e-66	0
Lamp1	0	1.65467	0.93	0.601	0	1.99405e-58	0.775676	0.511	0.392	6.93769e-54	2.51656e-92	0.49902	0.837	0.736	8.75562e-88	0	0.709773	0.983	0.852	0	1.99405e-58	0
Lamp2	0	1.41301	0.909	0.565	0	2.74926e-40	0.650039	0.407	0.346	9.56523e-36	4.61642e-212	0.750382	0.862	0.77	1.60614e-207	0	0.593573	0.945	0.782	0	2.74926e-40	0
Lgmn	0	2.02347	0.95	0.384	0	5.96607e-60	0.946382	0.534	0.323	2.07572e-55	5.35736e-178	0.91309	0.822	0.571	1.86393e-173	0	0.843341	0.995	0.731	0	5.96607e-60	0
Lyve1	0	3.13114	0.865	0.085	0	0	2.82316	0.467	0.022	0	0	2.15283	0.66	0.122	0	0	1.93599	0.897	0.376	0	0	0
Maf	0	1.86483	0.953	0.477	0	2.44877e-204	2.00988	0.536	0.141	8.51977e-200	9.01071e-181	0.898595	0.82	0.574	3.13501e-176	0	1.19752	0.994	0.682	0	9.01071e-181	0
Mafb	0	2.56974	0.967	0.302	0	1.5838e-164	1.72463	0.598	0.238	5.51035e-160	0	1.61134	0.897	0.501	0	1.95633e-220	0.581521	0.825	0.566	6.80646e-216	1.5838e-164	0
Mrc1	0	2.69141	0.939	0.278	0	9.64407e-133	1.38606	0.612	0.317	3.35537e-128	0	2.0736	0.929	0.534	0	0	1.27405	0.993	0.655	0	9.64407e-133	0
Ninj1	0	2.06542	0.795	0.285	0	4.44084e-24	0.707381	0.244	0.158	1.54506e-19	0	1.49689	0.762	0.395	0	0	0.798768	0.817	0.533	0	4.44084e-24	0
Pf4	0	3.51778	0.96	0.237	0	0	3.29049	0.914	0.249	0	0	2.1111	0.837	0.323	0	0	1.14257	1	0.84	0	0	0
Pltp	0	1.97338	0.911	0.281	0	1.05637e-82	1.091	0.557	0.357	3.67531e-78	4.66247e-131	0.718865	0.713	0.443	1.62217e-126	0	1.16347	0.756	0.387	0	1.05637e-82	0
Pmp22	0	1.89515	0.782	0.111	0	5.82509e-91	1.34841	0.232	0.044	2.02667e-86	4.97188e-274	0.896459	0.409	0.078	1.72982e-269	9.88131e-324	0.722252	0.748	0.428	3.43791e-319	5.82509e-91	0
Rnase4	0	2.4718	0.922	0.257	0	1.30058e-117	1.55964	0.305	0.064	4.52498e-113	2.67259e-194	0.88143	0.441	0.162	9.29846e-190	0	0.865829	0.954	0.635	0	1.30058e-117	0
Snx2	0	1.36553	0.829	0.488	0	3.39967e-68	0.999713	0.305	0.188	1.18281e-63	2.86855e-229	0.870799	0.697	0.554	9.98026e-225	0	1.04752	0.986	0.788	0	3.39967e-68	0
Stab1	0	2.38974	0.816	0.119	0	8.68889e-149	1.8267	0.321	0.051	3.02304e-144	1.58541e-274	1.17143	0.584	0.254	5.51596e-270	0	1.14155	0.963	0.594	0	8.68889e-149	0
Timp2	0	2.19135	0.931	0.442	0	3.77785e-160	1.59723	0.488	0.209	1.31439e-155	3.20447e-159	0.785198	0.501	0.29	1.1149e-154	0	0.997317	0.925	0.59	0	3.20447e-159	0
Trf	0	1.9822	0.877	0.364	0	1.33909e-43	0.847729	0.389	0.247	4.65895e-39	9.22528e-185	0.85323	0.531	0.319	3.20966e-180	0	0.989511	0.923	0.615	0	1.33909e-43	0
Wwp1	0	2.03081	0.813	0.197	0	1.64545e-88	1.29476	0.232	0.045	5.72485e-84	3.30705e-60	0.375715	0.289	0.196	1.15059e-55	0	1.16288	0.923	0.527	0	3.30705e-60	0
Zeb2	0	1.54411	0.949	0.498	0	3.03726e-22	0.375919	0.459	0.45	1.05672e-17	0	0.971147	0.957	0.681	0	1.66796e-177	0.400512	0.964	0.835	5.80316e-173	3.03726e-22	0
Ccl9	0	1.48226	0.897	0.347	0	9.51063e-11	0.282881	0.642	0.594	3.30894e-06	0	1.035	0.966	0.694	0	7.12133e-291	0.720571	0.793	0.518	2.47765e-286	9.51063e-11	0
Fcgr3	1.48322e-299	1.40258	0.867	0.426	5.16042e-295	5.40729e-42	0.667104	0.398	0.331	1.8813e-37	1.15203e-124	0.692339	0.751	0.563	4.00814e-120	0	0.756766	0.981	0.805	0	5.40729e-42	0
Adgre1	2.26025e-292	1.42813	0.787	0.312	7.86387e-288	1.19314e-37	0.760004	0.306	0.208	4.15116e-33	8.81751e-256	1.02779	0.813	0.517	3.06779e-251	0	0.639322	0.948	0.658	0	1.19314e-37	0
Gas7	1.1311e-283	1.33673	0.778	0.338	3.93533e-279	3.80079e-47	0.86157	0.3	0.188	1.32237e-42	8.80882e-137	0.701319	0.73	0.506	3.06477e-132	0	0.667681	0.793	0.523	0	3.80079e-47	0
Fcgr2b	1.53034e-264	1.31601	0.851	0.421	5.32436e-260	7.58556e-30	0.523921	0.431	0.38	2.63917e-25	0	1.57726	0.971	0.705	0	0	1.01266	0.843	0.56	0	7.58556e-30	0
Mt1	3.80243e-260	1.99177	0.807	0.375	1.32294e-255	8.35731e-28	0.639307	0.778	0.654	2.90768e-23	0	2.07434	0.982	0.801	0	0	0.964974	0.948	0.695	0	8.35731e-28	0
Ap2a2	2.59372e-259	1.20724	0.741	0.368	9.02406e-255	1.16375e-43	0.812799	0.289	0.198	4.04893e-39	1.02996e-314	1.09512	0.711	0.508	0	0	0.90684	0.858	0.539	0	1.16375e-43	0
Unc93b1	2.60219e-238	1.17654	0.889	0.487	9.05354e-234	2.67012e-41	0.570491	0.395	0.351	9.28988e-37	4.30176e-60	0.415512	0.785	0.649	1.49667e-55	0	0.652313	0.951	0.733	0	2.67012e-41	0
Ctsa	1.8112e-225	1.11677	0.826	0.505	6.30152e-221	1.29117e-36	0.592487	0.299	0.262	4.49224e-32	8.06254e-65	0.398733	0.605	0.548	2.80512e-60	0	0.600202	0.955	0.761	0	1.29117e-36	0
Aldh2	7.79226e-213	1.1463	0.801	0.422	2.71108e-208	1.93264e-29	0.677174	0.241	0.161	6.72403e-25	1.65955e-55	0.322721	0.325	0.251	5.77392e-51	0	0.681037	0.884	0.668	0	1.93264e-29	0
Pid1	4.53538e-201	1.0963	0.841	0.401	1.57795e-196	5.70769e-40	0.619826	0.437	0.365	1.98582e-35	0	1.34116	0.945	0.648	0	1.71927e-84	0.292361	0.693	0.525	5.9817e-80	5.70769e-40	0
Ms4a6b	1.50273e-193	1.10489	0.797	0.391	5.22829e-189	1.75694e-35	0.925042	0.264	0.128	6.11275e-31	0	1.43776	0.935	0.596	0	0	0.762966	0.95	0.656	0	1.75694e-35	0
Cd68	7.87559e-188	1.19429	0.728	0.368	2.74007e-183	3.86979e-19	0.256503	0.225	0.244	1.34638e-14	4.49501e-67	0.396183	0.5	0.442	1.5639e-62	0	0.606469	0.96	0.722	0	3.86979e-19	0
Ms4a6c	3.11689e-177	0.980779	0.805	0.372	1.08443e-172	4.43452e-09	0.295147	0.373	0.331	0.000154286	0	1.02822	0.958	0.681	0	0	0.592477	0.954	0.693	0	4.43452e-09	0
Snx3	1.06954e-156	0.755399	0.833	0.709	3.72115e-152	1.67067e-36	0.534225	0.338	0.303	5.8126e-32	1.65945e-73	0.429784	0.71	0.671	5.77357e-69	0	0.725594	0.986	0.85	0	1.67067e-36	0
Marcksl1	1.58321e-126	0.991012	0.633	0.341	5.50832e-122	5.94851e-18	0.504111	0.457	0.385	2.0696e-13	0	1.87579	0.938	0.63	0	4.41948e-278	0.538053	0.943	0.743	1.53763e-273	5.94851e-18	0
Mt2	9.8179e-85	1.19013	0.286	0.078	3.41584e-80	2.63725e-06	0.372551	0.292	0.267	0.0917553	0	2.26044	0.968	0.654	0	6.50763e-123	0.407913	0.289	0.136	2.26414e-118	2.63725e-06	0
Eps15	3.03916e-245	1.16469	0.715	0.371	1.05739e-240	9.67617e-41	0.863914	0.212	0.107	3.36653e-36	1.47695e-95	0.496817	0.524	0.434	5.1386e-91	4.10074e-322	0.63639	0.765	0.508	1.42673e-317	9.67617e-41	1.6403e-321
Aplp2	1.53808e-237	1.15514	0.752	0.432	5.35129e-233	1.27629e-21	0.384999	0.254	0.241	4.44047e-17	3.62925e-243	0.91763	0.743	0.561	1.26269e-238	1.38141e-320	0.670435	0.777	0.53	4.80619e-316	1.27629e-21	5.52563e-320
Cd63	3.68225e-292	1.36065	0.834	0.292	1.28113e-287	3.86754e-68	1.11028	0.442	0.185	1.3456e-63	3.82479e-224	0.911237	0.714	0.354	1.33072e-219	4.88038e-307	0.350559	0.979	0.754	1.69798e-302	3.86754e-68	1.95215e-306
Rhob	1.90486e-297	1.67048	0.787	0.388	6.6274e-293	3.68578e-79	1.32885	0.369	0.152	1.28236e-74	1.42027e-56	0.443995	0.62	0.475	4.94139e-52	1.71034e-291	0.68279	0.846	0.59	5.95063e-287	1.42027e-56	7.61945e-297
Klf2	7.65356e-254	1.6569	0.887	0.55	2.66283e-249	9.79723e-133	1.52646	0.641	0.372	3.40865e-128	1.10346e-38	0.433271	0.588	0.489	3.83915e-34	9.49735e-276	0.824507	0.877	0.708	3.30432e-271	1.10346e-38	3.79894e-275
Cd33	6.13803e-229	1.19471	0.72	0.256	2.13554e-224	1.35508e-51	1.05493	0.24	0.081	4.71461e-47	1.77149e-252	1.0522	0.615	0.268	6.16336e-248	1.41482e-88	0.269501	0.734	0.566	4.92244e-84	1.35508e-51	7.08595e-252
Cd302	1.401e-225	1.08738	0.591	0.218	4.87436e-221	2.74121e-35	0.652895	0.215	0.154	9.53721e-31	6.49057e-203	0.82481	0.55	0.294	2.2582e-198	2.7526e-251	0.550918	0.741	0.487	9.57684e-247	2.74121e-35	1.10104e-250
Klf4	5.24262e-208	1.57152	0.736	0.39	1.82401e-203	4.12918e-92	1.28561	0.513	0.312	1.43662e-87	7.24412e-243	1.13521	0.697	0.457	2.52037e-238	9.30659e-207	0.734096	0.751	0.553	3.23795e-202	4.12918e-92	2.89765e-242
Jun	6.20133e-185	1.33654	0.871	0.648	2.15757e-180	1.15095e-126	1.59257	0.551	0.282	4.00439e-122	1.09617e-53	0.492958	0.75	0.672	3.81379e-49	1.44341e-232	0.628183	0.947	0.825	5.02192e-228	1.09617e-53	5.77365e-232
Qk	5.26495e-209	1.03204	0.78	0.509	1.83178e-204	1.47857e-24	0.537768	0.267	0.215	5.14424e-20	1.47981e-71	0.371588	0.73	0.72	5.14855e-67	7.55642e-227	0.499811	0.882	0.695	2.62903e-222	1.47857e-24	3.02257e-226
Rnf130	6.22489e-130	0.785724	0.765	0.545	2.16576e-125	4.18888e-21	0.269085	0.204	0.219	1.4574e-16	1.52063e-68	0.331397	0.481	0.489	5.29059e-64	7.00132e-225	0.463949	0.921	0.794	2.4359e-220	4.18888e-21	2.80053e-224
Scpep1	2.04512e-205	1.03489	0.694	0.37	7.11536e-201	8.82017e-32	0.665541	0.214	0.144	3.06871e-27	9.39033e-71	0.4263	0.46	0.381	3.26709e-66	7.23946e-179	0.461351	0.667	0.467	2.51875e-174	8.82017e-32	8.18046e-205
Egr1	9.5403e-154	1.82363	0.634	0.379	3.31926e-149	3.09806e-135	1.64145	0.603	0.34	1.07788e-130	5.40538e-69	0.944168	0.574	0.456	1.88064e-64	3.26517e-200	0.605677	0.906	0.769	1.13602e-195	5.40538e-69	1.30607e-199
Zfand5	2.39899e-199	1.15111	0.802	0.544	8.34657e-195	5.91301e-21	0.31839	0.372	0.389	2.05726e-16	1.38892e-166	0.670634	0.809	0.74	4.83233e-162	2.16537e-94	0.32974	0.886	0.789	7.53377e-90	5.91301e-21	9.59596e-199
Ccl2	3.27778e-23	0.490382	0.242	0.121	1.1404e-18	8.77096e-14	0.566084	0.286	0.24	3.05159e-09	1.82187e-51	0.328161	0.513	0.329	6.33867e-47	1.23737e-190	0.620775	0.829	0.596	4.30506e-186	8.77096e-14	4.94948e-190
mt-Nd1	1.71947e-25	0.285864	0.967	0.932	5.98239e-21	6.59003e-21	0.331435	0.907	0.896	2.2928e-16	8.67535e-35	0.289724	0.933	0.95	3.01833e-30	1.83455e-184	0.431411	0.99	0.958	6.38278e-180	6.59003e-21	7.33822e-184
Sh3bgrl	3.98351e-154	0.919949	0.786	0.524	1.38594e-149	4.37649e-27	0.381933	0.313	0.31	1.52267e-22	1.18936e-183	0.681917	0.883	0.753	4.13803e-179	4.35227e-82	0.290044	0.834	0.708	1.51424e-77	4.37649e-27	4.75745e-183
Gm42418	2.33956e-174	1.08442	0.976	0.996	8.1398e-170	8.80853e-27	0.386226	0.851	0.84	3.06467e-22	4.28722e-08	0.43886	1	0.999	0.00149161	4.05086e-135	0.536965	0.995	0.95	1.40938e-130	4.28722e-08	9.35824e-174
Bri3	5.50651e-168	0.859895	0.794	0.613	1.91583e-163	9.19911e-26	0.400162	0.294	0.293	3.20056e-21	4.10943e-70	0.413106	0.664	0.644	1.42975e-65	6.48071e-123	0.344324	0.917	0.805	2.25477e-118	9.19911e-26	2.2026e-167
Dstn	3.54313e-98	0.674003	0.786	0.527	1.23272e-93	4.99575e-34	0.56581	0.285	0.239	1.73812e-29	1.852e-164	0.758623	0.741	0.623	6.44349e-160	3.5724e-133	0.351132	0.865	0.709	1.24291e-128	4.99575e-34	7.40802e-164
Mat2a	1.86706e-102	0.76818	0.668	0.479	6.49588e-98	5.42542e-31	0.631249	0.256	0.204	1.88761e-26	1.19165e-162	0.666234	0.801	0.732	4.14599e-158	7.54442e-72	0.304607	0.814	0.706	2.62486e-67	5.42542e-31	4.7666e-162
Hsbp1	2.41195e-29	0.35172	0.625	0.551	8.39167e-25	3.4675e-25	0.409649	0.224	0.212	1.20641e-20	8.63662e-90	0.324081	0.484	0.533	3.00485e-85	3.20188e-162	0.427362	0.846	0.699	1.114e-157	3.4675e-25	1.28075e-161
Rab14	5.82671e-102	0.639453	0.78	0.642	2.02723e-97	3.21225e-21	0.364803	0.219	0.214	1.11761e-16	6.35232e-54	0.269688	0.709	0.74	2.2101e-49	3.0993e-161	0.376581	0.93	0.8	1.07831e-156	3.21225e-21	1.23972e-160
Tmem176b	4.18774e-64	0.46132	0.858	0.616	1.457e-59	9.11608e-24	0.363483	0.517	0.513	3.17167e-19	4.5695e-155	0.667688	0.904	0.725	1.58982e-150	2.25642e-76	0.25665	0.737	0.574	7.85052e-72	9.11608e-24	1.8278e-154
Ier3	7.816e-142	1.22842	0.727	0.411	2.71934e-137	4.7394e-21	0.599468	0.329	0.274	1.64893e-16	7.07691e-47	0.520008	0.655	0.535	2.4622e-42	1.319e-131	0.386571	0.929	0.804	4.58906e-127	4.7394e-21	3.1264e-141
Atp6v0b	7.08244e-120	0.672195	0.855	0.727	2.46412e-115	9.42798e-32	0.310355	0.409	0.439	3.28018e-27	9.22192e-70	0.362129	0.728	0.711	3.20849e-65	8.51169e-117	0.277848	0.966	0.888	2.96139e-112	9.42798e-32	2.83298e-119
St13	2.9326e-38	0.407154	0.625	0.536	1.02031e-33	2.55333e-22	0.263106	0.204	0.228	8.88354e-18	1.43262e-66	0.355758	0.648	0.632	4.98438e-62	3.94463e-112	0.327174	0.874	0.745	1.37241e-107	2.55333e-22	1.57785e-111
Mrfap1	2.79281e-84	0.541407	0.747	0.657	9.71673e-80	3.80554e-29	0.349545	0.255	0.27	1.32402e-24	4.97472e-95	0.367668	0.656	0.649	1.73081e-90	5.64313e-99	0.289114	0.904	0.785	1.96336e-94	3.80554e-29	2.25725e-98
Rbms1	9.2985e-98	0.669212	0.791	0.669	3.23513e-93	1.81955e-26	0.397253	0.306	0.311	6.33057e-22	2.18573e-63	0.338908	0.766	0.782	7.60458e-59	3.79342e-81	0.278974	0.875	0.772	1.31981e-76	1.81955e-26	3.7194e-97
Casp4	4.08813e-53	0.537046	0.398	0.214	1.42234e-48	1.29847e-40	0.818262	0.269	0.195	4.51762e-36	5.24869e-40	0.36266	0.543	0.478	1.82612e-35	5.53852e-61	0.275827	0.493	0.367	1.92696e-56	5.24869e-40	2.21541e-60

## Sheet: C1
	Exp_1_(S005)_p_val	S005_avg_log2FC	S005_pct.1	S005_pct.2	S005_p_val_adj	Exp_2_(SP024)_p_val	SP024_avg_log2FC	SP024_pct.1	SP024_pct.2	SP024_p_val_adj	Exp_3_(LPS)_p_val	LPS_avg_log2FC	LPS_pct.1	LPS_pct.2	LPS_p_val_adj	Exp_4_(S006)_p_val	S006_avg_log2FC	S006_pct.1	S006_pct.2	S006_p_val_adj	max_pval	minimump_p_val
Lyz2	5.22553e-195	1.35535	0.989	0.678	1.81807e-190	1.19103e-133	0.644424	0.968	0.892	4.14383e-129	1.0589e-303	1.26016	0.985	0.783	3.68412e-299	2.39696e-97	0.644511	0.977	0.866	8.3395e-93	2.39696e-97	4.23559e-303
Ctss	3.64945e-163	0.992051	0.985	0.644	1.26972e-158	1.28575e-25	0.36303	0.837	0.756	4.47339e-21	5.68053e-140	0.498745	0.979	0.791	1.97637e-135	5.2118e-260	0.87606	0.989	0.814	1.81329e-255	1.28575e-25	2.08472e-259
Lgals3	3.35351e-37	0.777571	0.853	0.65	1.16675e-32	1.67744e-38	0.547671	0.743	0.649	5.83614e-34	8.78619e-15	0.261846	0.55	0.46	3.05689e-10	9.09719e-247	1.7924	0.832	0.609	3.16509e-242	8.78619e-15	3.63887e-246
Cstb	5.79087e-60	0.779417	0.757	0.527	2.01476e-55	3.35255e-40	0.52907	0.512	0.41	1.16642e-35	7.35507e-189	0.884442	0.932	0.7	2.55897e-184	1.43564e-242	0.938876	0.973	0.801	4.99488e-238	3.35255e-40	5.74256e-242
Anxa5	2.96201e-113	0.803855	0.944	0.71	1.03054e-108	1.80243e-36	0.464806	0.594	0.504	6.27103e-32	1.42544e-61	0.45442	0.85	0.66	4.95939e-57	2.43878e-240	0.748038	0.986	0.859	8.48499e-236	1.80243e-36	9.7551e-240
Ccr2	8.94601e-132	1.25282	0.825	0.405	3.1125e-127	2.75004e-82	0.839177	0.555	0.359	9.56795e-78	1.48843e-227	1.05947	0.796	0.355	5.17853e-223	1.1812e-58	0.792438	0.316	0.152	4.10962e-54	1.1812e-58	5.95371e-227
Clec4a2	2.6919e-98	0.841662	0.689	0.303	9.36567e-94	4.79952e-41	0.607326	0.394	0.287	1.66985e-36	3.14412e-220	1.00774	0.798	0.388	1.0939e-215	2.08921e-75	0.379765	0.882	0.691	7.26876e-71	4.79952e-41	1.25765e-219
Clec4a1	1.27497e-146	1.15882	0.763	0.325	4.43588e-142	1.15485e-12	0.37361	0.273	0.201	4.01795e-08	7.17957e-218	0.854263	0.939	0.618	2.49792e-213	1.45488e-68	0.33885	0.848	0.654	5.06182e-64	1.15485e-12	2.87183e-217
Ccl9	2.08873e-207	1.35659	0.911	0.378	7.26712e-203	1.19466e-69	0.630418	0.731	0.552	4.15646e-65	9.38095e-171	0.650337	0.97	0.724	3.26382e-166	7.49743e-46	0.39557	0.752	0.582	2.60851e-41	7.49743e-46	8.35493e-207
Lgmn	5.42808e-205	1.22373	0.933	0.42	1.88854e-200	3.43156e-49	0.678114	0.471	0.303	1.19391e-44	8.34551e-71	0.429834	0.827	0.599	2.90357e-66	1.4868e-144	0.442002	0.988	0.788	5.17287e-140	3.43156e-49	2.17123e-204
Mafb	7.03797e-201	1.17131	0.897	0.351	2.44865e-196	7.58281e-54	0.699357	0.409	0.233	2.63821e-49	1.77753e-72	0.336281	0.807	0.568	6.18437e-68	5.20721e-132	0.679162	0.87	0.614	1.81169e-127	7.58281e-54	2.81519e-200
Pid1	7.27946e-190	1.27247	0.894	0.42	2.53267e-185	1.9628e-41	0.60365	0.457	0.343	6.82899e-37	4.07106e-171	0.662588	0.955	0.68	1.4164e-166	1.35456e-84	0.462438	0.773	0.549	4.71279e-80	1.9628e-41	2.91178e-189
C3ar1	6.8742e-184	1.0707	0.768	0.24	2.39167e-179	3.55251e-30	0.523867	0.222	0.116	1.23599e-25	2.69335e-134	0.631103	0.72	0.377	9.3707e-130	1.56872e-166	0.628384	0.927	0.669	5.45789e-162	3.55251e-30	2.74968e-183
Aif1	7.04677e-143	1.17823	0.758	0.32	2.45171e-138	3.56829e-31	0.53616	0.384	0.251	1.24148e-26	1.90005e-169	0.924456	0.776	0.427	6.61064e-165	1.34821e-87	0.377806	0.908	0.703	4.69068e-83	3.56829e-31	7.60019e-169
Psap	1.09842e-166	1.10769	0.991	0.827	3.82161e-162	1.30902e-32	0.332224	0.938	0.855	4.55434e-28	2.91314e-93	0.466697	0.985	0.866	1.01354e-88	1.4546e-148	0.628479	0.992	0.921	5.06084e-144	1.30902e-32	4.39366e-166
Ly86	6.51334e-166	1.14535	0.903	0.468	2.26612e-161	9.78083e-13	0.304497	0.377	0.328	3.40295e-08	9.4376e-101	0.498733	0.845	0.572	3.28353e-96	6.34263e-54	0.349251	0.867	0.713	2.20673e-49	9.78083e-13	2.60533e-165
Metrnl	9.56798e-154	1.13369	0.781	0.364	3.32889e-149	3.71636e-21	0.436575	0.384	0.287	1.293e-16	3.59536e-33	0.273341	0.626	0.456	1.2509e-28	8.87927e-109	0.511434	0.822	0.584	3.08927e-104	3.71636e-21	3.82719e-153
Ctsb	2.49475e-147	0.954991	0.98	0.699	8.67973e-143	3.16812e-31	0.416788	0.642	0.532	1.10225e-26	2.62632e-128	0.574851	0.98	0.868	9.1375e-124	1.05464e-134	0.640478	0.995	0.882	3.6693e-130	3.16812e-31	9.979e-147
Fn1	1.20134e-75	1.0133	0.408	0.123	4.17971e-71	5.68991e-69	0.699403	0.548	0.33	1.97963e-64	2.11419e-142	1.03622	0.521	0.192	7.3557e-138	3.12594e-71	0.806252	0.293	0.118	1.08758e-66	5.68991e-69	8.45678e-142
Lrp1	4.66312e-117	0.830898	0.672	0.256	1.62239e-112	3.81236e-09	0.293759	0.22	0.185	0.00013264	1.29858e-101	0.566929	0.563	0.275	4.51804e-97	3.14833e-139	0.55416	0.822	0.54	1.09537e-134	3.81236e-09	1.25933e-138
Adgre1	1.17825e-134	0.93233	0.79	0.34	4.09935e-130	7.98324e-13	0.336445	0.265	0.203	2.77753e-08	6.56363e-74	0.411839	0.796	0.555	2.28362e-69	1.2721e-97	0.418386	0.923	0.722	4.42589e-93	7.98324e-13	4.71299e-134
Ctsh	7.9311e-125	0.77759	0.927	0.532	2.75939e-120	1.54383e-20	0.367156	0.488	0.426	5.37129e-16	1.48314e-67	0.300205	0.755	0.518	5.16016e-63	3.78355e-119	0.496797	0.932	0.718	1.31637e-114	1.54383e-20	3.17244e-124
Sdc4	2.33814e-19	0.666408	0.562	0.413	8.13487e-15	3.80275e-24	0.597917	0.428	0.329	1.32305e-19	2.38008e-123	0.392811	0.976	0.785	8.28079e-119	2.13503e-40	0.400383	0.799	0.648	7.4282e-36	2.33814e-19	9.52034e-123
Anxa2	2.62743e-27	0.36785	0.92	0.778	9.14135e-23	1.07605e-12	0.279057	0.674	0.601	3.74381e-08	5.68977e-116	0.598657	0.903	0.642	1.97958e-111	1.45159e-87	0.522781	0.924	0.778	5.05036e-83	1.07605e-12	2.27591e-115
Plin2	2.76709e-35	0.488371	0.62	0.405	9.62727e-31	1.94767e-15	0.393782	0.236	0.163	6.77634e-11	2.94124e-114	0.597998	0.895	0.655	1.02332e-109	1.26045e-76	0.415252	0.947	0.799	4.38535e-72	1.94767e-15	1.1765e-113
Lamp1	3.32543e-109	0.74309	0.929	0.621	1.15698e-104	1.776e-22	0.396102	0.463	0.385	6.17906e-18	1.75249e-77	0.41512	0.916	0.729	6.09726e-73	1.98984e-85	0.303134	0.988	0.879	6.92304e-81	1.776e-22	1.33017e-108
Socs3	6.02751e-109	1.3339	0.704	0.331	2.09709e-104	2.00266e-12	0.294877	0.412	0.371	6.96765e-08	3.12972e-69	0.480634	0.817	0.613	1.08889e-64	6.45945e-79	0.557317	0.614	0.386	2.24737e-74	2.00266e-12	2.411e-108
Ier3	1.02101e-108	1.18068	0.792	0.421	3.55228e-104	9.49384e-29	0.621034	0.359	0.252	3.3031e-24	1.11393e-22	0.381998	0.678	0.543	3.87559e-18	6.91966e-34	0.265478	0.93	0.83	2.40749e-29	1.11393e-22	4.08402e-108
Rassf4	3.46007e-107	0.840224	0.803	0.415	1.20383e-102	4.20409e-10	0.26889	0.273	0.246	1.46269e-05	5.56271e-68	0.402332	0.825	0.606	1.93538e-63	1.92807e-46	0.26576	0.753	0.576	6.70813e-42	4.20409e-10	1.38403e-106
Calr	5.37847e-22	0.368489	0.868	0.758	1.87128e-17	1.68011e-18	0.362087	0.456	0.405	5.84545e-14	1.11983e-78	0.552487	0.913	0.787	3.89612e-74	7.70562e-46	0.302722	0.945	0.853	2.68094e-41	1.68011e-18	4.47933e-78
Slfn2	2.53494e-27	0.436665	0.794	0.634	8.81956e-23	5.45142e-14	0.317008	0.466	0.397	1.89666e-09	4.19777e-72	0.414647	0.944	0.832	1.46049e-67	2.86051e-70	0.388889	0.912	0.768	9.95227e-66	5.45142e-14	1.67911e-71
Tnfsf9	4.34361e-47	0.906631	0.406	0.18	1.51123e-42	8.5915e-27	0.661681	0.263	0.186	2.98916e-22	1.09515e-25	0.405454	0.54	0.391	3.81024e-21	8.91274e-39	0.532374	0.384	0.248	3.10092e-34	1.09515e-25	1.73745e-46

## Sheet: C2
	Exp_1_(S005)_p_val	S005_avg_log2FC	S005_pct.1	S005_pct.2	S005_p_val_adj	Exp_2_(SP024)_p_val	SP024_avg_log2FC	SP024_pct.1	SP024_pct.2	SP024_p_val_adj	Exp_3_(LPS)_p_val	LPS_avg_log2FC	LPS_pct.1	LPS_pct.2	LPS_p_val_adj	Exp_4_(S006)_p_val	S006_avg_log2FC	S006_pct.1	S006_pct.2	S006_p_val_adj	max_pval	minimump_p_val
Birc5	2.60468e-21	2.03016	0.833	0.054	9.06222e-17	8.10479e-25	2.03255	0.568	0.021	2.81982e-20	2.98802e-69	1.64506	0.792	0.03	1.03959e-64	0	1.85181	0.892	0.146	0	2.60468e-21	0
Tpx2	2.92324e-17	1.51002	0.75	0.06	1.01705e-12	1.13041e-13	1.26395	0.297	0.008	3.93293e-09	6.50449e-57	1.21471	0.722	0.035	2.26304e-52	0	1.26546	0.762	0.118	0	1.13041e-13	0
Ccnb2	5.07439e-17	1.93252	0.708	0.048	1.76548e-12	1.79389e-13	1.29099	0.324	0.012	6.24132e-09	2.34043e-50	1.30644	0.625	0.025	8.14281e-46	0	1.09728	0.647	0.125	0	1.79389e-13	0
Mki67	5.10739e-17	2.15703	0.792	0.09	1.77696e-12	2.68447e-15	1.4264	0.405	0.02	9.33981e-11	1.7447e-62	2.20252	0.889	0.102	6.07015e-58	0	1.88491	0.922	0.173	0	2.68447e-15	0
Kif23	1.68998e-16	1.56595	0.875	0.138	5.8798e-12	5.34951e-14	1.19027	0.351	0.016	1.8612e-09	1.82356e-39	0.946111	0.667	0.06	6.34452e-35	0	1.01771	0.716	0.182	0	5.34951e-14	0
Stmn1	2.45461e-15	2.386	0.875	0.184	8.54008e-11	1.93295e-44	3.7048	0.919	0.09	6.72513e-40	3.38825e-46	2.03542	0.792	0.11	1.17884e-41	0	1.88522	0.999	0.628	0	2.45461e-15	0
Tubb5	8.96725e-14	1.72138	0.917	0.713	3.11989e-09	2.1189e-33	2.59869	0.946	0.372	7.37209e-29	2.01308e-43	1.64237	0.958	0.714	7.00391e-39	0	1.57967	0.999	0.859	0	8.96725e-14	0
Nusap1	1.06915e-13	1.438	0.583	0.038	3.71979e-09	3.07862e-16	1.90134	0.351	0.01	1.07111e-11	2.85508e-44	0.858411	0.556	0.025	9.93341e-40	0	1.40356	0.728	0.091	0	1.06915e-13	0
Ube2c	3.8759e-13	1.81868	0.625	0.052	1.3485e-08	5.2634e-10	1.36342	0.297	0.019	1.83124e-05	3.87058e-80	3.0083	0.833	0.03	1.34665e-75	0	1.66938	0.737	0.133	0	5.2634e-10	0
Smc2	9.17521e-13	1.58877	0.75	0.134	3.19224e-08	3.93787e-13	1.54432	0.405	0.029	1.37006e-08	3.12653e-44	1.3828	0.792	0.101	1.08778e-39	0	1.3626	0.916	0.297	0	9.17521e-13	0
Cdca3	1.64351e-12	1.22908	0.583	0.046	5.71811e-08	5.17177e-13	1.27966	0.297	0.01	1.79936e-08	2.46255e-47	0.925341	0.569	0.021	8.56771e-43	0	1.21473	0.752	0.106	0	1.64351e-12	0
Cdk1	1.48741e-11	1.07909	0.583	0.054	5.17501e-07	5.63081e-09	1.21036	0.243	0.013	0.000195907	3.0417e-61	1.65416	0.708	0.029	1.05827e-56	0	1.66584	0.882	0.276	0	5.63081e-09	0
Racgap1	1.53973e-11	1.27032	0.667	0.115	5.35701e-07	2.47746e-05	1.07481	0.243	0.037	0.861958	2.67435e-52	1.22327	0.722	0.043	9.30461e-48	0	1.28793	0.798	0.124	0	2.47746e-05	0
Ncapd2	2.88283e-11	1.30856	0.542	0.06	1.00299e-06	8.00607e-10	0.984883	0.27	0.014	2.78547e-05	3.75849e-42	0.797479	0.583	0.031	1.30765e-37	0	0.739898	0.629	0.099	0	8.00607e-10	0
Cks1b	6.46776e-11	1.27951	0.667	0.099	2.25026e-06	2.82011e-13	1.62146	0.432	0.035	9.81174e-09	1.12785e-54	1.36375	0.792	0.063	3.924e-50	0	1.14093	0.891	0.274	0	6.46776e-11	0
Ccna2	7.88956e-11	1.09559	0.5	0.037	2.74493e-06	1.08259e-09	1.04757	0.243	0.01	3.76654e-05	2.97107e-69	1.20096	0.736	0.021	1.0337e-64	0	1.19995	0.758	0.088	0	1.08259e-09	0
Tuba1b	8.17117e-11	1.77508	0.958	0.619	2.84291e-06	1.22339e-25	2.28015	0.946	0.387	4.25642e-21	4.28e-33	1.45545	0.986	0.773	1.4891e-28	0	1.57816	0.998	0.745	0	8.17117e-11	0
Top2a	2.86277e-10	1.84444	0.625	0.087	9.96016e-06	1.9917e-26	2.60227	0.622	0.027	6.92953e-22	2.58769e-64	2.58501	0.806	0.061	9.00308e-60	0	1.94733	0.876	0.208	0	2.86277e-10	0
Cdca8	3.68688e-10	1.09929	0.583	0.072	1.28274e-05	8.77699e-09	1.19747	0.243	0.014	0.000305369	7.35653e-48	1.09852	0.653	0.036	2.55948e-43	0	1.41804	0.862	0.149	0	8.77699e-09	0
Ckap5	6.16881e-10	1.23294	0.75	0.177	2.14625e-05	1.59141e-05	0.780213	0.243	0.034	0.553683	8.97244e-16	0.757192	0.681	0.223	3.12169e-11	0	0.652115	0.661	0.241	0	1.59141e-05	0
Asf1b	9.44574e-10	0.778356	0.542	0.062	3.28636e-05	1.74675e-13	1.56392	0.297	0.009	6.0773e-09	3.95197e-24	0.598637	0.389	0.026	1.37497e-19	0	1.00137	0.805	0.167	0	9.44574e-10	0
Prc1	3.21467e-09	1.13562	0.5	0.051	0.000111845	1.23084e-11	1.18682	0.27	0.009	4.28236e-07	6.67611e-54	1.36845	0.681	0.031	2.32275e-49	0	1.47584	0.735	0.1	0	3.21467e-09	0
Tmpo	4.86496e-09	1.52435	0.75	0.348	0.000169262	7.24708e-16	1.93055	0.622	0.081	2.5214e-11	6.46168e-26	1.18796	0.861	0.335	2.24815e-21	0	1.08608	0.934	0.472	0	4.86496e-09	0
Nucks1	5.43616e-09	1.12463	0.917	0.512	0.000189135	8.02876e-10	1.29161	0.649	0.169	2.79337e-05	8.68474e-30	1.2795	0.944	0.624	3.02159e-25	0	0.990308	0.973	0.616	0	5.43616e-09	0
Atad2	5.71931e-09	1.23526	0.75	0.217	0.000198986	3.8845e-10	1.36139	0.324	0.024	1.3515e-05	1.11353e-20	1.02482	0.625	0.143	3.87418e-16	0	1.01535	0.796	0.282	0	5.71931e-09	0
Smc4	1.83873e-08	1.32176	0.833	0.36	0.00063973	9.754e-09	1.48145	0.459	0.084	0.000339361	5.78088e-39	1.53961	0.861	0.256	2.01128e-34	0	1.33129	0.908	0.377	0	1.83873e-08	0
Mad2l1	3.12445e-08	0.796405	0.5	0.064	0.00108706	2.09289e-07	1.11963	0.216	0.014	0.00728159	1.19649e-22	0.536959	0.417	0.037	4.16284e-18	0	0.643618	0.644	0.144	0	2.09289e-07	0
Spc24	4.63384e-08	0.940965	0.458	0.05	0.00161221	3.97547e-12	1.29073	0.351	0.021	1.38314e-07	1.66004e-32	0.546406	0.444	0.022	5.77561e-28	0	1.09968	0.799	0.134	0	4.63384e-08	0
Cenpa	1.26956e-07	1.41887	0.583	0.189	0.00441706	9.71447e-07	1.30374	0.351	0.062	0.0337986	2.08775e-40	1.2709	0.667	0.058	7.2637e-36	0	1.17105	0.734	0.29	0	9.71447e-07	0
Lockd	1.54103e-07	0.625339	0.5	0.079	0.00536156	4.35383e-11	1.83117	0.297	0.015	1.51478e-06	4.5573e-28	0.780411	0.444	0.03	1.58558e-23	0	0.611379	0.533	0.081	0	1.54103e-07	0
Ezh2	2.40326e-07	0.821062	0.667	0.162	0.00836143	6.26251e-12	1.46458	0.405	0.035	2.17885e-07	1.45661e-12	0.524743	0.5	0.135	5.06783e-08	0	0.862452	0.812	0.305	0	2.40326e-07	0
Hmgb2	2.66637e-07	1.33058	0.917	0.654	0.00927682	9.53876e-21	2.32693	0.865	0.278	3.31873e-16	8.38389e-54	2.2102	0.958	0.525	2.91692e-49	0	1.1957	0.996	0.854	0	2.66637e-07	0
Kif11	7.63238e-07	0.71075	0.375	0.038	0.0265546	1.22267e-11	0.919609	0.243	0.006	4.25391e-07	2.38569e-41	1.02012	0.528	0.022	8.30028e-37	0	0.955071	0.62	0.067	0	7.63238e-07	0
H2afz	8.15473e-07	1.00566	1	0.868	0.0283719	1.03987e-10	1.08315	0.973	0.71	3.61792e-06	1.87116e-17	0.907254	0.986	0.691	6.51014e-13	0	0.951161	1	0.946	0	8.15473e-07	0
Incenp	9.93645e-07	0.729937	0.542	0.106	0.0345709	9.08911e-08	0.667038	0.216	0.014	0.00316228	1.49677e-31	0.973455	0.625	0.077	5.20755e-27	0	1.17799	0.808	0.231	0	9.93645e-07	0
Gatm	2.02403e-06	1.1111	0.708	0.228	0.0704199	0.00320142	0.677302	0.351	0.132	1	3.93738e-06	0.420062	0.514	0.243	0.136989	0	0.770188	0.948	0.566	0	0.00320142	0
H2afv	2.15823e-06	1.08666	0.875	0.536	0.075089	4.90049e-13	1.80944	0.703	0.175	1.70498e-08	2.25632e-11	0.498983	0.528	0.17	7.85018e-07	0	0.891672	0.95	0.551	0	2.15823e-06	0
Rrm1	2.53144e-06	0.88928	0.542	0.119	0.0880738	2.37524e-16	1.84502	0.432	0.022	8.26394e-12	4.51532e-26	1.05092	0.625	0.111	1.57097e-21	0	1.0354	0.844	0.274	0	2.53144e-06	0
Kif15	2.7823e-06	0.70737	0.375	0.047	0.0968017	8.07183e-11	1.10703	0.216	0.005	2.80835e-06	9.87374e-44	0.841895	0.556	0.023	3.43527e-39	0	0.846508	0.62	0.066	0	2.7823e-06	0
Uhrf1	3.28596e-06	0.9445	0.292	0.049	0.114325	4.7088e-10	1.26063	0.27	0.014	1.63829e-05	5.66021e-24	0.556572	0.444	0.042	1.9693e-19	0	0.798548	0.678	0.195	0	3.28596e-06	0
Lig1	5.25376e-06	1.18421	0.458	0.104	0.182789	1.48583e-13	1.52988	0.405	0.027	5.16949e-09	1.3794e-18	0.467865	0.389	0.045	4.79921e-14	0	0.874554	0.731	0.306	0	5.25376e-06	0
Cks2	6.35075e-06	0.911249	0.75	0.277	0.220955	8.7756e-07	1.23668	0.622	0.22	0.0305321	4.9716e-29	1.21195	0.792	0.187	1.72972e-24	0	0.724838	0.83	0.404	0	6.35075e-06	0
Ccdc34	7.90656e-06	0.738338	0.583	0.152	0.275085	2.95834e-11	1.48765	0.405	0.039	1.02926e-06	1.46225e-24	0.857076	0.569	0.083	5.08746e-20	0	0.733171	0.793	0.294	0	7.90656e-06	0
Gmnn	9.53759e-06	0.699521	0.583	0.153	0.331832	7.12852e-07	1.06438	0.297	0.039	0.0248015	2.74388e-18	0.521976	0.486	0.082	9.5465e-14	0	0.950012	0.853	0.341	0	9.53759e-06	0
Prdx4	9.74827e-06	0.87312	0.667	0.276	0.339162	4.1169e-06	1.02676	0.405	0.096	0.143235	5.35047e-10	0.475461	0.472	0.15	1.86154e-05	0	0.724656	0.942	0.582	0	9.74827e-06	0
Hist1h1b	1.29437e-05	0.968744	0.333	0.039	0.450339	3.95618e-10	1.1087	0.216	0.006	1.37644e-05	9.53876e-27	0.785074	0.375	0.018	3.31872e-22	0	1.12027	0.513	0.068	0	1.29437e-05	0
Lmnb1	1.61731e-05	0.742695	0.708	0.25	0.562693	0.000346599	0.663094	0.351	0.109	1	1.66137e-28	1.00682	0.819	0.197	5.78024e-24	0	1.00872	0.905	0.323	0	0.000346599	0
Pbk	2.20118e-05	0.680031	0.292	0.029	0.765836	2.09958e-19	1.36568	0.351	0.005	7.30484e-15	1.81704e-27	0.745127	0.347	0.013	6.32185e-23	0	1.28674	0.731	0.077	0	2.20118e-05	0
Rrm2	4.64312e-05	0.807214	0.333	0.047	1	2.60522e-15	1.46425	0.378	0.015	9.06409e-11	4.32906e-21	0.727183	0.333	0.021	1.50617e-16	0	1.23853	0.668	0.116	0	4.64312e-05	0
Dek	6.20918e-05	0.871553	0.917	0.61	1	1.39093e-08	1.29795	0.676	0.223	0.000483932	9.82836e-07	0.55355	0.819	0.555	0.0341948	0	0.935622	0.98	0.738	0	6.20918e-05	0
Rad21	6.2807e-05	0.843995	0.75	0.364	1	1.03766e-07	1.10138	0.459	0.098	0.00361023	3.55371e-21	1.08955	0.889	0.403	1.23641e-16	0	0.779589	0.836	0.412	0	6.2807e-05	0
Ube2s	9.79354e-05	1.02541	0.792	0.532	1	2.4123e-10	1.41115	0.757	0.259	8.39286e-06	4.04452e-31	1.26125	0.889	0.566	1.40717e-26	0	0.90059	0.975	0.773	0	9.79354e-05	0
Ran	0.000156093	0.743592	0.917	0.674	1	1.21719e-05	1.09099	0.676	0.312	0.423485	2.16638e-14	0.717251	0.986	0.738	7.53727e-10	0	0.882579	0.994	0.811	0	0.000156093	0
Usp1	0.000190622	0.82013	0.542	0.218	1	3.95934e-08	1.131	0.324	0.037	0.00137753	2.13214e-13	0.661109	0.708	0.28	7.41816e-09	0	0.653196	0.743	0.294	0	0.000190622	0
Pmf1	0.00072377	0.411048	0.458	0.139	1	0.000295323	0.929662	0.216	0.037	1	7.67151e-13	0.331002	0.361	0.064	2.66907e-08	0	0.743545	0.813	0.308	0	0.00072377	0
Hist1h2ap	0.000858227	0.476086	0.292	0.053	1	2.88824e-24	3.0502	0.541	0.022	1.00488e-19	5.2225e-14	0.674503	0.264	0.024	1.81701e-09	0	2.13632	0.687	0.128	0	0.000858227	0
Tubb6	0.000911467	0.833634	0.625	0.308	1	0.00517436	0.783584	0.405	0.18	1	0.000113733	0.352388	0.708	0.459	1	0	0.870294	0.921	0.531	0	0.00517436	0
Ptma	0.00136841	0.702998	1	0.936	1	4.78471e-12	1.12539	0.973	0.87	1.6647e-07	9.25587e-09	0.586897	0.986	0.96	0.00032203	0	0.605334	1	0.973	0	0.00136841	0
Tubb4b	0.001472	1.02768	0.583	0.371	1	1.92353e-07	1.22821	0.405	0.075	0.00669235	2.9129e-22	1.13635	0.792	0.335	1.01346e-17	0	1.1974	0.935	0.558	0	0.001472	0
Hmgb1	0.0022204	0.643197	0.917	0.854	1	1.14172e-15	1.64723	0.919	0.494	3.97227e-11	5.35921e-14	0.855212	0.917	0.695	1.86457e-09	0	0.905911	1	0.898	0	0.0022204	0
Hmgn2	0.00253019	0.375992	0.583	0.254	1	6.76159e-14	1.93942	0.649	0.123	2.35249e-09	7.99507e-16	0.806028	0.583	0.181	2.78165e-11	0	0.890818	0.97	0.639	0	0.00253019	0
Anp32b	0.00426442	0.615744	0.917	0.714	1	1.18368e-09	1.38205	0.784	0.323	4.11825e-05	6.25816e-12	0.721644	0.958	0.757	2.17734e-07	0	0.841535	0.994	0.798	0	0.00426442	0
Alyref	0.00528823	0.567447	0.708	0.413	1	1.52999e-06	1.11275	0.568	0.185	0.0532314	1.06802e-10	0.56296	0.861	0.496	3.71585e-06	0	0.700701	0.941	0.608	0	0.00528823	0
Lsm2	0.00576976	0.640163	0.542	0.265	1	2.56718e-06	1.22343	0.297	0.05	0.0893172	1.91618e-11	0.460903	0.639	0.247	6.66676e-07	0	0.841598	0.891	0.41	0	0.00576976	0
Fcrls	0.0117022	0.427481	0.5	0.232	1	0.785906	0.258003	0.297	0.248	1	0.00442801	0.343302	0.292	0.142	1	0	0.542477	0.99	0.66	0	0.785906	0
Ybx1	0.0157459	0.399604	0.958	0.893	1	0.128228	0.305672	0.73	0.572	1	1.66139e-06	0.460273	0.958	0.871	0.0578032	0	0.548725	0.999	0.934	0	0.128228	0
Cbx5	0.0162775	0.388551	0.417	0.168	1	2.19631e-07	1.2703	0.297	0.035	0.0076414	1.46545e-15	0.7453	0.653	0.204	5.09861e-11	0	0.651413	0.752	0.309	0	0.0162775	0
Tagln2	0.0167021	0.424642	1	0.87	1	0.00136784	0.614548	0.892	0.646	1	6.06572e-11	0.717203	0.986	0.799	2.11039e-06	0	0.736701	1	0.927	0	0.0167021	0
Hmgn1	0.0182994	0.527775	0.625	0.354	1	0.000711331	0.860871	0.27	0.067	1	2.15356e-09	0.582822	0.625	0.269	7.49267e-05	0	0.883055	0.973	0.643	0	0.0182994	0
Hist1h2ae	0.0270528	0.570613	0.208	0.053	1	4.45577e-16	2.51961	0.378	0.017	1.55025e-11	4.83449e-19	0.645596	0.347	0.029	1.68202e-14	0	1.6369	0.596	0.097	0	0.0270528	0
Snrpd1	0.0345589	0.301224	0.667	0.411	1	7.10201e-07	1.02875	0.514	0.142	0.0247093	0.000160408	0.36101	0.764	0.531	1	0	0.660786	0.943	0.622	0	0.0345589	0
Dnajc9	0.0407155	0.254734	0.417	0.199	1	1.32107e-05	0.777035	0.243	0.033	0.459628	1.42128e-11	0.448569	0.403	0.094	4.94492e-07	0	0.639081	0.778	0.334	0	0.0407155	0
Ranbp1	0.279471	0.298158	0.667	0.513	1	0.011186	0.541677	0.514	0.28	1	1.82412e-08	0.586708	0.889	0.673	0.00063465	0	0.897772	0.97	0.698	0	0.279471	0
Anp32e	3.14134e-06	0.945393	0.833	0.4	0.109293	5.14303e-10	1.1742	0.649	0.166	1.78936e-05	5.30196e-06	0.500886	0.778	0.517	0.184466	2.47033e-323	0.668546	0.895	0.517	8.59477e-319	5.30196e-06	9.88131e-323
Hint1	0.148385	0.297782	0.875	0.777	1	8.93598e-06	0.787886	0.838	0.463	0.310901	3.78194e-06	0.448779	0.931	0.734	0.131581	3.0138e-322	0.576969	0.998	0.879	1.04856e-317	0.148385	1.20552e-321
Stab1	0.000234121	0.696032	0.625	0.236	1	3.03171e-05	0.50769	0.297	0.082	1	7.69737e-05	0.371397	0.583	0.346	1	1.08694e-321	0.511792	0.986	0.653	3.7817e-317	0.000234121	4.34778e-321
Pf4	9.09629e-06	1.08033	0.833	0.358	0.316478	3.05921e-06	1.15582	0.73	0.325	0.106436	8.60459e-10	0.703058	0.833	0.466	2.99371e-05	2.16845e-320	0.770197	0.999	0.868	7.54449e-316	9.09629e-06	8.67382e-320
Igfbp4	0.00922827	1.01282	0.542	0.262	1	1.36581e-05	1.2944	0.324	0.064	0.475192	9.61126e-08	0.329583	0.375	0.124	0.00334395	9.69088e-318	0.539673	0.992	0.688	0	0.00922827	3.87635e-317
Mcm7	0.00126152	0.870531	0.375	0.127	1	7.02212e-09	1.04937	0.297	0.024	0.000244314	2.68393e-11	0.500395	0.375	0.079	9.33792e-07	4.26779e-315	0.696751	0.71	0.288	0	0.00126152	1.70711e-314
Pcna	5.58058e-06	1.07872	0.667	0.326	0.194159	3.59201e-06	1.25115	0.459	0.132	0.124973	5.24623e-06	0.483635	0.847	0.577	0.182527	4.43835e-315	0.79994	0.788	0.418	0	5.58058e-06	1.77534e-314
Dab2	1.06103e-05	0.960339	0.833	0.359	0.369155	0.000117421	0.681955	0.568	0.243	1	2.31561e-08	0.293364	0.861	0.545	0.000805647	3.50198e-307	0.496337	0.999	0.728	1.21841e-302	0.000117421	1.40079e-306
Mrpl51	2.41338e-05	0.774614	0.792	0.375	0.839664	1.74657e-05	0.967788	0.405	0.107	0.607665	3.35944e-15	0.744619	0.819	0.365	1.16882e-10	2.94197e-295	0.591202	0.88	0.502	1.02357e-290	2.41338e-05	1.17679e-294
Anapc5	0.0509549	0.265068	0.625	0.384	1	0.0002048	0.840493	0.351	0.1	1	3.81815e-08	0.572167	0.667	0.339	0.00132841	3.04375e-294	0.577231	0.853	0.461	1.05898e-289	0.0509549	1.2175e-293
Trim47	1.15071e-07	0.895943	0.792	0.245	0.00400355	5.34639e-05	0.877535	0.324	0.075	1	6.0599e-09	0.305087	0.472	0.169	0.000210836	3.35071e-289	0.541495	0.885	0.498	1.16578e-284	5.34639e-05	1.34028e-288
Mcm5	0.000161262	0.643661	0.417	0.095	1	1.55857e-05	0.986648	0.216	0.024	0.542256	1.23934e-13	0.56891	0.417	0.081	4.31191e-09	2.60351e-284	0.647979	0.707	0.303	9.05813e-280	0.000161262	1.0414e-283
Lgmn	2.35791e-08	1.29856	0.958	0.478	0.000820365	0.000940963	0.595809	0.649	0.346	1	3.75979e-07	0.352172	0.917	0.64	0.013081	1.4241e-278	0.481437	1	0.776	4.95471e-274	0.000940963	5.69638e-278
Dck	0.000303699	0.843465	0.583	0.228	1	5.03519e-05	0.931117	0.324	0.074	1	1.78593e-17	0.983354	0.944	0.493	6.21362e-13	7.22224e-276	0.430855	0.563	0.189	2.51276e-271	0.000303699	2.88889e-275
C1qc	7.07989e-10	1.09335	1	0.411	2.46323e-05	2.68372e-08	1.14791	0.865	0.428	0.000933721	2.17019e-12	0.625795	0.986	0.668	7.55054e-08	5.30556e-273	0.340661	1	0.75	1.84591e-268	2.68372e-08	2.12222e-272
Ncaph2	0.00558295	0.616769	0.5	0.239	1	8.35351e-05	0.745876	0.297	0.067	1	9.66167e-09	0.31049	0.583	0.257	0.000336149	3.619e-270	0.480813	0.681	0.286	1.25912e-265	0.00558295	1.4476e-269
C1qa	3.30067e-08	1.27373	0.958	0.444	0.00114837	2.81352e-11	1.11461	0.973	0.475	9.78881e-07	8.93513e-13	0.78429	0.986	0.705	3.10871e-08	8.3701e-265	0.353447	1	0.769	2.91213e-260	3.30067e-08	3.34804e-264
Cbx3	0.00310755	0.642611	0.833	0.562	1	3.0471e-14	1.72386	0.838	0.236	1.06015e-09	5.07872e-16	0.864576	0.847	0.41	1.76699e-11	2.86957e-259	0.484952	0.906	0.554	9.98381e-255	0.00310755	1.14783e-258
Rbl1	0.000340879	0.364457	0.417	0.105	1	1.00591e-07	0.891385	0.243	0.018	0.00349976	1.94091e-10	0.428052	0.431	0.118	6.75282e-06	4.47955e-254	0.395156	0.515	0.167	1.55853e-249	0.000340879	1.79182e-253
Xpo1	0.140417	0.510052	0.458	0.274	1	0.000830084	0.671953	0.243	0.056	1	7.17005e-08	0.374242	0.681	0.35	0.0024946	3.04068e-251	0.454382	0.742	0.358	1.05791e-246	0.140417	1.21627e-250
Hdgf	0.00132998	0.736778	0.833	0.516	1	1.51985e-05	1.09516	0.459	0.14	0.528787	2.53509e-12	0.756272	0.889	0.564	8.82009e-08	2.63381e-246	0.537781	0.93	0.626	9.16356e-242	0.00132998	1.05353e-245
Smc1a	0.00149399	0.498741	0.75	0.39	1	0.00328737	0.768188	0.27	0.082	1	0.000337814	0.290433	0.639	0.404	1	2.69804e-245	0.58365	0.861	0.525	9.38701e-241	0.00328737	1.07922e-244
Smchd1	0.0128408	0.455858	0.75	0.453	1	0.0140931	0.471033	0.297	0.122	1	3.1863e-06	0.374358	0.792	0.504	0.110858	7.79391e-245	0.511416	0.836	0.473	2.71166e-240	0.0140931	3.11756e-244
Tuba1c	0.00108466	0.852563	0.75	0.411	1	0.000147228	0.686374	0.541	0.234	1	1.1223e-16	0.970572	0.917	0.569	3.9047e-12	1.74697e-244	0.613797	0.869	0.539	6.07807e-240	0.00108466	6.98789e-244
C1qb	2.1307e-09	1.19568	1	0.447	7.41313e-05	1.59258e-08	1.15018	0.919	0.521	0.000554089	7.46771e-12	0.718279	0.986	0.735	2.59817e-07	1.01306e-243	0.315186	1	0.789	3.52465e-239	1.59258e-08	4.05225e-243
Banf1	0.215126	0.357158	0.625	0.45	1	0.236353	0.358312	0.243	0.138	1	6.51523e-12	0.586736	0.819	0.408	2.26678e-07	7.7165e-243	0.498324	0.906	0.576	2.68472e-238	0.236353	3.0866e-242
Arhgap11a	0.000159486	0.720182	0.458	0.125	1	5.44521e-07	0.928338	0.27	0.03	0.018945	2.33245e-29	1.02076	0.708	0.135	8.11505e-25	4.42628e-236	0.370255	0.504	0.171	1.53999e-231	0.000159486	1.77051e-235
Cbfb	0.00299885	0.519334	0.75	0.407	1	0.00732031	0.688606	0.324	0.126	1	3.80249e-09	0.472312	0.819	0.465	0.000132296	6.03731e-233	0.444619	0.785	0.418	2.1005e-228	0.00732031	2.41492e-232
Smc6	0.063379	0.503498	0.625	0.451	1	0.00339235	0.83976	0.324	0.115	1	0.00143264	0.25985	0.625	0.412	1	2.2986e-226	0.539233	0.855	0.524	7.99728e-222	0.063379	9.19439e-226
Suz12	0.000351616	0.838435	0.667	0.285	1	6.37614e-05	0.783223	0.27	0.053	1	1.69738e-06	0.357919	0.653	0.355	0.0590552	8.10592e-225	0.434444	0.723	0.36	2.82021e-220	0.000351616	3.24237e-224
Snrpb	0.00762748	0.389483	0.958	0.723	1	0.00902443	0.262229	0.541	0.324	1	3.58379e-06	0.401414	0.917	0.708	0.124687	2.07752e-224	0.467262	0.988	0.837	7.22811e-220	0.00902443	8.31009e-224
Ddx39	0.245443	0.251913	0.417	0.262	1	0.00361102	0.817582	0.216	0.056	1	9.7785e-09	0.401056	0.694	0.349	0.000340214	1.44081e-223	0.406128	0.743	0.384	5.01288e-219	0.245443	5.76326e-223
Kpnb1	0.00821211	0.574457	0.583	0.319	1	0.00709554	0.610654	0.216	0.06	1	1.48214e-06	0.30995	0.778	0.482	0.0515666	2.03697e-217	0.430012	0.789	0.435	7.08701e-213	0.00821211	8.14786e-217
Fkbp2	0.000370993	0.755825	0.667	0.419	1	0.000199317	0.808764	0.568	0.248	1	4.68165e-10	0.373473	0.736	0.363	1.62884e-05	4.59628e-216	0.402433	0.893	0.569	1.59914e-211	0.000370993	1.83851e-215
Ms4a6b	9.79236e-05	0.668337	0.875	0.458	1	0.00042095	0.258857	0.324	0.143	1	6.83367e-08	0.408065	0.958	0.69	0.00237757	5.11371e-212	0.269598	0.969	0.704	1.77916e-207	0.00042095	2.04548e-211
Mcm3	0.00519697	0.60886	0.417	0.151	1	4.97776e-05	0.511736	0.216	0.034	1	1.00242e-11	0.513874	0.556	0.183	3.48763e-07	2.20482e-209	0.532825	0.748	0.398	7.67103e-205	0.00519697	8.8193e-209
Msr1	7.57059e-08	0.553447	0.667	0.168	0.00263396	0.000533375	0.65813	0.243	0.061	1	5.4776e-08	0.494461	0.889	0.579	0.00190577	6.22895e-209	0.278484	0.836	0.514	2.16718e-204	0.000533375	2.49158e-208
Haus8	0.105578	0.251802	0.292	0.128	1	4.3931e-06	0.875055	0.27	0.038	0.152845	4.11563e-10	0.270006	0.403	0.114	1.43191e-05	3.61742e-207	0.316858	0.524	0.207	1.25857e-202	0.105578	1.44697e-206
Smc3	0.0254502	0.601317	0.625	0.36	1	0.000488799	0.866536	0.297	0.078	1	1.48294e-06	0.307594	0.653	0.354	0.0515943	3.62073e-205	0.467063	0.833	0.503	1.25973e-200	0.0254502	1.44829e-204
Ccl2	0.00328034	0.933974	0.417	0.14	1	0.0190893	1.09401	0.432	0.245	1	7.42563e-08	0.82231	0.708	0.379	0.00258352	3.59908e-204	0.488944	0.919	0.619	1.25219e-199	0.0190893	1.43963e-203
Gas7	3.67029e-06	0.941075	0.875	0.411	0.127697	0.000778858	0.330325	0.432	0.2	1	3.06064e-10	0.452388	0.917	0.567	1.06486e-05	1.59458e-202	0.305874	0.869	0.555	5.54788e-198	0.000778858	6.37834e-202
Fam111a	0.00020887	0.724987	0.833	0.438	1	0.000540471	0.962925	0.378	0.127	1	3.47449e-17	0.967981	0.847	0.408	1.20884e-12	1.1401e-200	0.48526	0.917	0.639	3.96663e-196	0.000540471	4.56039e-200
Tgfbi	1.9612e-06	1.09479	0.917	0.503	0.068234	7.19409e-05	0.415316	0.757	0.413	1	1.80249e-10	0.771559	0.903	0.56	6.27121e-06	2.28328e-196	0.366731	0.944	0.668	7.944e-192	7.19409e-05	9.13313e-196
Arl6ip1	0.124683	0.595311	0.792	0.752	1	1.41803e-09	1.46832	0.784	0.356	4.93361e-05	1.15489e-19	1.14048	0.958	0.705	4.01809e-15	6.14955e-196	0.642827	0.98	0.846	2.13955e-191	0.124683	2.45982e-195
Actn4	0.100704	0.381318	0.625	0.413	1	0.0926263	0.510668	0.243	0.114	1	3.76459e-05	0.479999	0.778	0.52	1	1.80723e-195	0.444913	0.782	0.449	6.28772e-191	0.100704	7.22892e-195
Maz	0.000129057	0.654037	0.792	0.368	1	0.0100981	0.794998	0.243	0.079	1	9.29723e-08	0.436622	0.583	0.263	0.00323469	9.87294e-192	0.31898	0.723	0.394	3.43499e-187	0.0100981	3.94918e-191
Nop58	0.439289	0.325164	0.375	0.27	1	0.0857628	0.32968	0.243	0.126	1	1.29713e-07	0.353649	0.764	0.439	0.00451296	1.29154e-190	0.340655	0.764	0.438	4.49352e-186	0.439289	5.16616e-190
Rbm3	0.00262291	0.447883	1	0.783	1	0.000458527	0.370586	0.757	0.454	1	0.000180571	0.291611	0.986	0.859	1	1.34714e-189	0.391715	0.998	0.955	4.68698e-185	0.00262291	5.38858e-189
Ywhae	0.0100607	0.480192	0.833	0.74	1	0.00320845	0.261589	0.568	0.331	1	3.14941e-06	0.389464	0.986	0.845	0.109574	4.05329e-188	0.394993	0.996	0.887	1.41022e-183	0.0100607	1.62131e-187
Grn	6.04549e-08	1.21106	1	0.629	0.00210335	0.130033	0.306742	0.568	0.404	1	1.53286e-06	0.422484	0.972	0.776	0.0533313	1.11418e-187	0.299985	0.999	0.826	3.87647e-183	0.130033	4.45673e-187
Cd81	0.000876353	0.833502	0.792	0.534	1	2.93582e-07	1.16725	0.811	0.429	0.0102143	1.53166e-07	0.298067	0.792	0.48	0.00532897	2.4644e-184	0.327209	0.948	0.686	8.57412e-180	0.000876353	9.85758e-184
Lacc1	1.5542e-07	0.816286	0.75	0.214	0.00540739	0.000186159	0.680629	0.297	0.075	1	6.31665e-07	0.322076	0.806	0.506	0.0219769	3.10182e-179	0.314177	0.69	0.375	1.07918e-174	0.000186159	1.24073e-178
Ctsc	6.09094e-07	1.12548	0.958	0.643	0.0211916	2.94734e-05	0.91935	0.838	0.523	1	2.1194e-08	0.459849	0.972	0.721	0.000737381	5.90353e-178	0.357426	1	0.876	2.05396e-173	2.94734e-05	2.36141e-177
Pkig	1.3141e-05	0.916285	0.792	0.345	0.457203	0.070641	0.615784	0.243	0.115	1	1.09117e-07	0.509728	0.694	0.364	0.0037964	1.42391e-176	0.259907	0.783	0.474	4.95408e-172	0.070641	5.69565e-176
Mfsd1	9.37224e-05	0.665347	0.75	0.324	1	0.0161432	0.316473	0.297	0.136	1	1.53868e-06	0.318884	0.778	0.481	0.0535338	5.85159e-176	0.343831	0.862	0.563	2.03589e-171	0.0161432	2.34064e-175
Mrfap1	0.154472	0.379615	0.833	0.672	1	2.42406e-05	0.680668	0.622	0.267	0.843378	1.7854e-05	0.298617	0.889	0.648	0.621175	1.21956e-173	0.393327	0.977	0.792	4.2431e-169	0.154472	4.87825e-173
Tmem176b	0.378905	0.271198	0.75	0.657	1	0.000735479	0.501262	0.811	0.512	1	8.82357e-09	0.367797	1	0.774	0.00030699	7.76729e-172	0.255768	0.863	0.578	2.70239e-167	0.378905	3.10691e-171
Xist	0.00162073	0.901637	1	0.902	1	0.00861025	0.631284	0.892	0.715	1	0.0187959	0.27932	0.958	0.927	1	1.90666e-165	0.500521	0.981	0.884	6.63365e-161	0.0187959	7.62664e-165
Pih1d1	0.112506	0.320924	0.417	0.225	1	0.00166662	0.418812	0.216	0.056	1	8.15437e-13	0.451037	0.542	0.16	2.83707e-08	3.36375e-163	0.293635	0.622	0.322	1.17032e-158	0.112506	1.3455e-162
Calm2	0.0865211	0.356726	0.875	0.853	1	4.48556e-06	0.925963	0.892	0.554	0.156062	1.32769e-05	0.448426	0.903	0.736	0.46193	7.44582e-154	0.360657	1	0.952	2.59055e-149	0.0865211	2.97833e-153
Hnrnpu	0.116499	0.369391	0.875	0.737	1	0.000311669	0.827241	0.541	0.235	1	0.00182036	0.270586	0.931	0.819	1	1.21495e-148	0.384383	0.978	0.826	4.22705e-144	0.116499	4.8598e-148
Ywhah	0.0334929	0.413699	0.917	0.699	1	0.279098	0.383215	0.486	0.358	1	1.22913e-05	0.340182	0.903	0.67	0.427639	2.40226e-148	0.388492	0.968	0.813	8.35793e-144	0.279098	9.60903e-148
Itgb1	4.73328e-05	0.695609	0.958	0.56	1	0.000865079	0.358985	0.514	0.254	1	0.000687074	0.304725	0.875	0.686	1	4.45616e-148	0.298333	0.952	0.733	1.55039e-143	0.000865079	1.78247e-147
Atp6ap2	0.00126585	0.778172	0.833	0.509	1	0.334027	0.280718	0.351	0.243	1	6.33581e-07	0.506676	0.861	0.573	0.0220436	1.4394e-146	0.292784	0.945	0.72	5.00795e-142	0.334027	5.75759e-146
Ptms	1.20635e-05	1.18338	0.875	0.647	0.419712	0.00116196	0.605621	0.649	0.354	1	2.51042e-10	0.473422	0.917	0.563	8.73425e-06	2.52188e-146	0.325056	0.97	0.77	8.77412e-142	0.00116196	1.00875e-145
Rpn2	0.00280633	0.520121	0.833	0.498	1	0.174009	0.448099	0.27	0.15	1	4.74038e-09	0.449856	0.889	0.555	0.000164927	8.46437e-144	0.251634	0.883	0.628	2.94492e-139	0.174009	3.38575e-143
Lgals1	0.147275	0.353809	0.917	0.82	1	0.0011478	0.561366	0.892	0.625	1	2.27615e-06	0.631088	0.833	0.638	0.0791918	6.07308e-143	0.3537	1	0.933	2.11294e-138	0.147275	2.42923e-142
Ndufab1	0.0349031	0.317857	0.708	0.448	1	0.0389967	0.399451	0.351	0.182	1	9.11582e-07	0.281511	0.778	0.481	0.0317158	1.13284e-139	0.29499	0.87	0.612	3.94139e-135	0.0389967	4.53137e-139
Cx3cr1	6.27759e-05	1.59708	0.625	0.211	1	0.00126994	0.685936	0.351	0.127	1	1.32641e-13	1.50908	0.528	0.141	4.61485e-09	8.54152e-137	0.380045	0.879	0.627	2.97177e-132	0.00126994	3.41661e-136
Slamf9	2.34644e-05	0.891242	0.75	0.311	0.816374	0.00389149	0.576468	0.459	0.217	1	1.93497e-07	0.555955	0.806	0.488	0.00673213	6.44054e-114	0.293536	0.43	0.204	2.24079e-109	0.00389149	2.57622e-113
Tppp3	1.33718e-07	1.61388	0.917	0.489	0.00465232	0.00127381	0.86603	0.784	0.525	1	0.00174336	0.303762	0.514	0.312	1	7.97356e-107	0.265675	0.586	0.346	2.77416e-102	0.00174336	3.18943e-106

## Sheet: C3
	Exp_1_(S005)_p_val	S005_avg_log2FC	S005_pct.1	S005_pct.2	S005_p_val_adj	Exp_2_(SP024)_p_val	SP024_avg_log2FC	SP024_pct.1	SP024_pct.2	SP024_p_val_adj	Exp_3_(LPS)_p_val	LPS_avg_log2FC	LPS_pct.1	LPS_pct.2	LPS_p_val_adj	Exp_4_(S006)_p_val	S006_avg_log2FC	S006_pct.1	S006_pct.2	S006_p_val_adj	max_pval	minimump_p_val
Cd209a	2.90235e-236	3.31684	0.783	0.137	1.00979e-231	0	3.0079	0.802	0.181	0	6.11401e-39	1.07902	0.433	0.137	2.12719e-34	3.30834e-168	2.48442	0.428	0.01	1.15104e-163	6.11401e-39	0
Olfm1	6.46502e-157	1.65087	0.849	0.234	2.24931e-152	2.4787e-85	0.939616	0.384	0.13	8.62389e-81	5.68342e-205	1.7928	0.897	0.267	1.97737e-200	0	1.80085	0.862	0.048	0	2.4787e-85	0
H2-DMb1	3.28784e-141	1.63061	0.984	0.394	1.14391e-136	4.74068e-127	0.896665	0.832	0.491	1.64938e-122	4.36605e-142	1.5349	0.932	0.347	1.51904e-137	0	3.13454	0.987	0.155	0	4.74068e-127	0
Naaa	4.87384e-132	1.86245	0.865	0.299	1.6957e-127	3.90856e-94	1.09396	0.559	0.26	1.35987e-89	1.07472e-263	2.3406	0.954	0.449	3.73916e-259	0	2.58578	0.894	0.23	0	3.90856e-94	0
H2-DMa	7.50228e-126	1.48359	0.978	0.451	2.61019e-121	3.98329e-86	0.689823	0.831	0.553	1.38587e-81	2.09928e-129	1.45611	0.934	0.407	7.3038e-125	0	2.61445	0.99	0.272	0	3.98329e-86	0
H2-Ab1	3.45993e-115	1.71764	0.984	0.575	1.20378e-110	3.78339e-238	1.06038	0.998	0.905	1.31632e-233	1.21393e-94	1.27789	1	0.79	4.22349e-90	0	5.24172	0.99	0.126	0	1.21393e-94	0
H2-Eb1	2.23786e-111	1.63649	0.978	0.512	7.78597e-107	3.76526e-192	0.862816	0.997	0.82	1.31001e-187	3.68824e-112	1.42903	1	0.74	1.28321e-107	0	5.02275	0.99	0.098	0	2.23786e-111	0
H2-Aa	2.39583e-105	1.65313	0.972	0.557	8.33558e-101	3.35882e-216	0.947449	0.998	0.854	1.1686e-211	1.66927e-103	1.33877	1	0.752	5.80772e-99	0	5.14457	0.99	0.108	0	1.66927e-103	0
Cd74	1.49047e-103	1.7081	0.987	0.722	5.18565e-99	3.5371e-194	1.02694	1	0.958	1.23063e-189	1.67175e-87	1.31906	1	0.901	5.81636e-83	0	4.96274	1	0.477	0	1.67175e-87	0
Cst3	6.74216e-90	1.51899	1	0.871	2.34573e-85	8.99881e-175	1.0517	0.98	0.876	3.13087e-170	2.37632e-166	2.21438	0.994	0.883	8.26771e-162	0	2.63994	1	0.972	0	6.74216e-90	0
Plbd1	1.18429e-152	1.73332	0.934	0.331	4.12039e-148	2.52756e-98	1.00437	0.506	0.202	8.7939e-94	8.82843e-126	1.44687	0.849	0.334	3.07159e-121	0	2.57643	0.981	0.172	2.51487e-304	2.52756e-98	2.89132e-308
Gm2a	2.18533e-158	1.53955	0.984	0.624	7.60321e-154	2.08919e-154	1.09231	0.85	0.499	7.2687e-150	5.50989e-236	2.18499	0.974	0.499	1.917e-231	1.28706e-280	1.79189	0.997	0.659	4.47794e-276	2.08919e-154	5.14824e-280
Lsp1	1.12301e-142	1.3164	0.997	0.848	3.90717e-138	1.05587e-125	0.868469	0.861	0.562	3.67358e-121	1.21657e-196	1.68043	0.989	0.601	4.2327e-192	3.15482e-241	1.98215	0.997	0.725	1.09762e-236	1.05587e-125	1.26193e-240
Cbfa2t3	1.67179e-104	1.20075	0.874	0.312	5.8165e-100	2.34094e-38	0.654844	0.209	0.075	8.14461e-34	2.25233e-232	1.92435	0.906	0.177	7.8363e-228	4.28981e-74	0.889446	0.788	0.319	1.49251e-69	2.34094e-38	9.00932e-232
Napsa	4.97221e-121	1.29077	0.94	0.317	1.72993e-116	2.67703e-84	0.891457	0.452	0.179	9.31392e-80	2.98144e-153	1.57173	0.858	0.267	1.0373e-148	7.51507e-227	2.06032	0.984	0.187	2.61464e-222	2.67703e-84	3.00603e-226
Ckb	2.95575e-108	1.48422	0.903	0.391	1.02836e-103	2.01385e-76	0.946676	0.475	0.212	7.0066e-72	1.30757e-223	1.99436	0.783	0.132	4.54929e-219	8.12376e-130	1.4356	0.942	0.704	2.82642e-125	2.01385e-76	5.23028e-223
Bcl2a1d	3.92775e-22	0.314391	0.403	0.168	1.36654e-17	8.81207e-42	0.578371	0.492	0.285	3.06589e-37	5.85482e-36	0.528586	0.658	0.318	2.03701e-31	1.80889e-203	1.78929	0.878	0.145	6.29349e-199	3.92775e-22	7.23556e-203
Slamf7	2.011e-84	0.955903	0.78	0.245	6.99668e-80	2.72965e-59	0.810806	0.283	0.096	9.49699e-55	1.45034e-74	0.927583	0.752	0.282	5.04603e-70	1.49518e-196	1.15913	0.666	0.038	5.20204e-192	2.72965e-59	5.98073e-196
Itgb7	7.0163e-55	0.290183	0.868	0.467	2.44111e-50	3.91557e-80	0.847688	0.321	0.096	1.3623e-75	3.35047e-45	0.42837	0.57	0.227	1.16569e-40	3.3162e-189	1.43772	0.887	0.138	1.15377e-184	3.35047e-45	1.32648e-188
Klrb1b	2.28363e-72	0.895705	0.686	0.2	7.94519e-68	9.35854e-108	1.04142	0.295	0.059	3.25602e-103	5.11723e-42	0.471476	0.538	0.208	1.78039e-37	1.85858e-187	0.993941	0.621	0.033	6.46638e-183	5.11723e-42	7.43434e-187
Tmsb10	1.90439e-33	0.349405	0.987	0.759	6.62576e-29	8.61535e-92	0.549649	0.958	0.772	2.99745e-87	7.11182e-87	1.40323	0.946	0.613	2.47434e-82	2.37479e-174	1.80875	1	0.78	8.26237e-170	1.90439e-33	9.49917e-174
Crip1	4.78563e-64	1.07975	1	0.899	1.66502e-59	1.10437e-102	0.551356	0.999	0.975	3.84231e-98	1.15641e-150	1.71495	1	0.874	4.02339e-146	2.75076e-174	1.7656	1	0.932	9.57044e-170	4.78563e-64	1.1003e-173
Psmb8	2.90989e-21	0.437182	0.943	0.769	1.01241e-16	1.8369e-31	0.342074	0.572	0.39	6.39093e-27	1.32516e-24	0.424032	0.949	0.799	4.61048e-20	1.9031e-173	1.36385	0.984	0.764	6.62126e-169	2.90989e-21	7.61239e-173
Fgfr1	2.0955e-50	0.488393	0.673	0.273	7.29065e-46	5.6205e-38	0.548727	0.333	0.163	1.95548e-33	2.47773e-169	1.6271	0.863	0.235	8.62052e-165	3.73455e-42	0.502382	0.543	0.187	1.29932e-37	5.6205e-38	9.91092e-169
H2afy	1.10113e-74	1.00232	0.969	0.667	3.83104e-70	1.01842e-96	0.963705	0.577	0.266	3.54328e-92	6.99249e-114	1.0646	0.96	0.687	2.43283e-109	2.08488e-164	1.17102	0.977	0.782	7.25372e-160	1.10113e-74	8.33953e-164
Mgl2	6.01791e-83	1.82329	0.736	0.343	2.09375e-78	2.96626e-161	1.35472	0.7	0.323	1.03202e-156	1.08122e-129	2.06718	0.638	0.299	3.76178e-125	1.29365e-23	0.739202	0.415	0.442	4.50088e-19	1.29365e-23	1.18651e-160
Ptms	1.14656e-93	1.17285	0.972	0.632	3.98913e-89	2.50677e-40	0.547715	0.533	0.325	8.72157e-36	6.46861e-149	1.51928	0.983	0.547	2.25056e-144	1.77713e-35	0.590286	0.968	0.799	6.183e-31	1.77713e-35	2.58745e-148
Tnip3	7.0038e-67	1.4328	0.623	0.176	2.43676e-62	2.25675e-111	1.16919	0.679	0.351	7.85168e-107	3.37435e-35	0.891533	0.738	0.425	1.174e-30	1.62227e-147	1.83565	0.524	0.051	5.64422e-143	3.37435e-35	6.4891e-147
H2afz	1.28628e-70	0.980921	0.987	0.862	4.47524e-66	1.80696e-133	0.926774	0.91	0.678	6.28679e-129	1.65841e-137	1.63613	0.969	0.681	5.76994e-133	2.32955e-101	1.17708	0.994	0.954	8.10496e-97	1.28628e-70	6.63364e-137
Atox1	6.21824e-96	1.06462	0.984	0.698	2.16345e-91	3.5907e-61	0.575355	0.832	0.614	1.24928e-56	7.6563e-136	1.25657	0.969	0.72	2.66378e-131	8.79627e-106	0.927536	0.977	0.906	3.0604e-101	3.5907e-61	3.06252e-135
H2-DMb2	7.9073e-42	0.417759	0.469	0.145	2.75111e-37	2.36645e-27	0.46162	0.222	0.101	8.23336e-23	1.57294e-70	0.785946	0.507	0.11	5.47258e-66	1.13605e-135	0.866369	0.534	0.039	3.95254e-131	2.36645e-27	4.5442e-135
Cd9	3.0034e-71	0.972048	0.877	0.387	1.04494e-66	7.40754e-129	0.705213	0.699	0.324	2.57723e-124	1.02606e-72	0.359721	0.798	0.327	3.56987e-68	3.25555e-125	1.40981	0.958	0.441	1.13267e-120	3.0034e-71	2.96302e-128
Tep1	3.64077e-65	0.879977	0.802	0.344	1.2667e-60	6.23119e-27	0.495695	0.327	0.181	2.16795e-22	1.46456e-123	1.267	0.775	0.299	5.09548e-119	3.77392e-39	0.579432	0.685	0.336	1.31302e-34	6.23119e-27	5.85823e-123
Alcam	2.52152e-75	0.758278	0.77	0.26	8.77288e-71	1.50849e-28	0.514941	0.314	0.167	5.24835e-24	1.99153e-54	0.665169	0.672	0.261	6.92893e-50	4.29147e-123	0.984174	0.678	0.111	1.49309e-118	1.50849e-28	1.71659e-122
Tnfsf9	2.93841e-35	1.44164	0.465	0.193	1.02233e-30	1.03918e-48	0.775276	0.379	0.177	3.61553e-44	1.41741e-06	0.735496	0.521	0.415	0.0493147	1.93668e-117	1.94282	0.627	0.257	6.73811e-113	1.41741e-06	7.74674e-117
Klrd1	2.26576e-55	0.664166	0.582	0.182	7.88303e-51	6.2516e-83	0.937461	0.248	0.054	2.17506e-78	7.97944e-65	0.826961	0.43	0.08	2.77621e-60	3.41952e-115	0.970526	0.457	0.036	1.18972e-110	2.26576e-55	1.36781e-114
Ccnd1	1.32462e-114	1.51337	0.827	0.225	4.60861e-110	3.91011e-49	0.687383	0.215	0.066	1.36041e-44	3.25127e-76	1.24234	0.681	0.233	1.13118e-71	6.10928e-25	0.443	0.855	0.576	2.12554e-20	6.10928e-25	5.29847e-114
Ccdc88a	5.33759e-89	1.04845	0.849	0.314	1.85706e-84	1.27994e-30	0.531985	0.302	0.153	4.45315e-26	3.40743e-112	1.27077	0.9	0.424	1.18551e-107	1.40275e-16	0.364477	0.643	0.41	4.88043e-12	1.40275e-16	1.36297e-111
Pfkp	4.52887e-26	0.341097	0.635	0.337	1.57568e-21	5.3834e-25	0.413278	0.235	0.115	1.87299e-20	5.39902e-109	1.35477	0.843	0.372	1.87843e-104	3.65422e-34	0.467558	0.553	0.225	1.27138e-29	5.3834e-25	2.15961e-108
Anxa2	2.86524e-55	0.921191	0.981	0.785	9.96873e-51	7.5444e-51	0.434129	0.81	0.588	2.62485e-46	2.63132e-99	1.2147	0.974	0.68	9.15491e-95	6.43015e-109	1.22663	0.99	0.792	2.23718e-104	7.5444e-51	2.57206e-108
Bhlhe40	1.23294e-39	0.777907	0.648	0.278	4.28965e-35	2.7131e-26	0.461907	0.404	0.248	9.43943e-22	1.03692e-77	1.17545	0.741	0.258	3.60764e-73	4.80688e-108	1.23878	0.559	0.081	1.67241e-103	2.7131e-26	1.92275e-107
Cytip	2.23884e-38	0.362032	0.899	0.562	7.78938e-34	1.26255e-49	0.532434	0.527	0.3	4.39266e-45	1.17417e-96	0.978815	0.889	0.341	4.08516e-92	7.46014e-107	1.01609	0.875	0.272	2.59553e-102	2.23884e-38	2.98406e-106
Tmsb4x	1.39557e-32	0.501577	1	1	4.85548e-28	1.68922e-90	0.393427	1	0.999	5.87714e-86	7.59235e-107	1.20023	1	0.997	2.64153e-102	1.80013e-49	0.652348	1	1	6.26303e-45	1.39557e-32	3.03694e-106
Naga	7.59684e-92	1.214	0.786	0.278	2.64309e-87	7.31253e-73	0.869596	0.276	0.077	2.54418e-68	4.11446e-106	1.22674	0.641	0.183	1.4315e-101	2.36731e-101	1.11197	0.801	0.354	8.23636e-97	7.31253e-73	1.64578e-105
BC028528	6.37483e-77	1.02826	0.774	0.3	2.21793e-72	5.45329e-46	0.6673	0.463	0.253	1.89731e-41	1.009e-101	1.09515	0.718	0.236	3.5105e-97	5.31842e-70	0.926515	0.736	0.341	1.85038e-65	5.45329e-46	4.03598e-101
Sub1	3.29138e-38	0.596305	0.984	0.87	1.14514e-33	1.05316e-73	0.596416	0.924	0.767	3.66416e-69	9.84009e-78	0.928166	0.957	0.729	3.42356e-73	2.20418e-100	0.91544	0.997	0.929	7.66877e-96	3.29138e-38	8.8167e-100
Syngr2	2.68491e-89	1.09749	0.921	0.494	9.34133e-85	2.26775e-80	0.892514	0.499	0.222	7.88995e-76	3.22909e-100	1.19646	0.906	0.472	1.12346e-95	1.41484e-91	0.923018	0.929	0.611	4.92251e-87	2.26775e-80	1.29164e-99
Cd24a	5.63126e-59	0.649857	0.701	0.264	1.95923e-54	4.04546e-88	0.929706	0.375	0.121	1.4075e-83	2.4055e-98	1.07087	0.664	0.148	8.36922e-94	7.59019e-88	1.07742	0.55	0.092	2.64078e-83	5.63126e-59	9.622e-98
Zyx	9.13913e-77	1.01747	0.937	0.578	3.17969e-72	6.45081e-35	0.498595	0.423	0.242	2.24437e-30	9.86974e-98	1.16753	0.912	0.53	3.43388e-93	2.01782e-43	0.641196	0.923	0.686	7.02041e-39	6.45081e-35	3.9479e-97
Vrk1	2.32276e-44	0.672154	0.755	0.359	8.08134e-40	7.81126e-45	0.591705	0.276	0.11	2.7177e-40	2.86151e-30	0.415232	0.484	0.199	9.95575e-26	6.13801e-97	0.997501	0.881	0.47	2.13554e-92	2.86151e-30	2.4552e-96
Clec4b1	9.02067e-89	1.16521	0.635	0.137	3.13847e-84	1.43824e-96	0.920745	0.56	0.246	5.00392e-92	1.2254e-83	1.17808	0.67	0.202	4.2634e-79	5.28998e-90	0.802633	0.338	0.027	1.84049e-85	1.2254e-83	5.75295e-96
Avpi1	1.58281e-47	0.708025	0.56	0.18	5.50691e-43	5.96517e-48	0.798923	0.268	0.101	2.0754e-43	6.08687e-59	0.768203	0.544	0.17	2.11774e-54	5.80091e-95	1.01692	0.579	0.134	2.01825e-90	1.58281e-47	2.32036e-94
Rnh1	9.44704e-31	0.485827	0.843	0.527	3.28681e-26	3.08242e-25	0.425395	0.369	0.221	1.07244e-20	1.81013e-94	1.09297	0.858	0.44	6.29782e-90	6.85859e-21	0.447199	0.9	0.727	2.38624e-16	6.85859e-21	7.24054e-94
Sec61b	1.80261e-54	0.838191	0.959	0.774	6.27165e-50	1.96446e-42	0.503751	0.673	0.457	6.83475e-38	4.22634e-94	1.14331	0.92	0.697	1.47043e-89	2.95966e-25	0.474063	0.961	0.871	1.02973e-20	2.95966e-25	1.69053e-93
Actg1	6.31217e-59	0.784716	1	0.981	2.19613e-54	5.1631e-76	0.455966	0.975	0.872	1.79635e-71	2.1515e-53	0.693977	1	0.975	7.48548e-49	3.11773e-92	0.855851	1	0.99	1.08472e-87	2.1515e-53	1.24709e-91
Wnt11	5.21359e-90	1.04542	0.459	0.051	1.81391e-85	1.72254e-64	0.842607	0.214	0.051	5.99305e-60	8.43072e-64	0.680318	0.325	0.04	2.93321e-59	6.39506e-76	0.367414	0.238	0.007	2.22497e-71	8.43072e-64	2.08543e-89
Etv3	6.07298e-20	0.598757	0.616	0.352	2.11291e-15	1.77652e-87	1.00716	0.548	0.259	6.18087e-83	3.77958e-41	1.06262	0.726	0.45	1.31499e-36	8.19565e-79	1.05232	0.711	0.353	2.85143e-74	6.07298e-20	7.10609e-87
Rpsa	4.35483e-28	0.402852	1	0.947	1.51513e-23	3.59074e-31	0.307889	0.879	0.739	1.24929e-26	1.36174e-14	0.275993	0.994	0.953	4.73778e-10	2.10639e-85	0.752628	1	0.983	7.32856e-81	1.36174e-14	8.42557e-85
Eps8	5.18708e-52	0.658635	0.767	0.337	1.80469e-47	2.37831e-36	0.521261	0.422	0.237	8.27461e-32	3.80972e-85	1.01031	0.764	0.271	1.32548e-80	6.98785e-30	0.544676	0.83	0.525	2.43121e-25	6.98785e-30	1.52389e-84
Ltb4r1	1.06953e-53	0.456126	0.739	0.328	3.72111e-49	1.50229e-51	0.666262	0.346	0.148	5.22676e-47	4.52577e-40	0.454839	0.57	0.235	1.57461e-35	6.5992e-83	0.742336	0.592	0.13	2.29599e-78	4.52577e-40	2.63968e-82
Mpeg1	1.13172e-80	1.14353	0.862	0.339	3.93746e-76	1.89785e-29	0.267418	0.456	0.295	6.60301e-25	3.90774e-46	0.737716	0.897	0.565	1.35958e-41	4.12661e-56	0.95826	0.801	0.38	1.43573e-51	1.89785e-29	4.52686e-80
Gpr132	8.63659e-30	0.520612	0.569	0.256	3.00484e-25	9.51651e-26	0.354023	0.327	0.189	3.31098e-21	5.76801e-28	0.447905	0.573	0.28	2.00681e-23	9.26959e-74	0.586188	0.55	0.116	3.22508e-69	9.51651e-26	3.70784e-73
Rplp0	3.11255e-26	0.4335	0.997	0.95	1.08292e-21	9.77158e-50	0.421404	0.925	0.783	3.39973e-45	1.18449e-16	0.331476	0.972	0.933	4.12108e-12	2.15254e-68	0.677587	0.997	0.986	7.4891e-64	1.18449e-16	8.61014e-68
Clec10a	7.77938e-35	0.447623	0.513	0.2	2.7066e-30	2.33764e-65	0.944747	0.271	0.082	8.13312e-61	7.11159e-55	1.0719	0.427	0.099	2.47426e-50	7.66301e-12	0.707505	0.498	0.413	2.66612e-07	7.66301e-12	9.35056e-65
Fem1c	4.57599e-21	0.270498	0.509	0.26	1.59208e-16	3.89806e-17	0.271538	0.216	0.122	1.35621e-12	7.405e-65	0.797131	0.681	0.255	2.57635e-60	3.33195e-33	0.486345	0.65	0.314	1.15925e-28	3.89806e-17	2.962e-64
Rpl28	4.09279e-42	0.555665	0.997	0.954	1.42397e-37	3.19179e-37	0.356373	0.872	0.711	1.11049e-32	3.35214e-15	0.311805	0.983	0.925	1.16628e-10	2.59603e-60	0.579751	0.997	0.981	9.0321e-56	3.35214e-15	1.03841e-59
Rps11	3.11663e-35	0.532642	1	0.961	1.08434e-30	1.14129e-58	0.452273	0.957	0.858	3.97077e-54	6.12657e-36	0.563501	0.98	0.901	2.13155e-31	1.98537e-54	0.55416	1	0.989	6.90751e-50	3.11663e-35	4.56515e-58
Plp2	2.5739e-30	0.406062	0.777	0.454	8.95512e-26	1.22797e-25	0.458381	0.223	0.105	4.27237e-21	4.62519e-50	0.609325	0.638	0.247	1.60919e-45	3.06675e-58	0.779579	0.768	0.347	1.06698e-53	1.22797e-25	1.2267e-57
Actb	4.46769e-56	0.633274	1	1	1.5544e-51	5.34367e-46	0.543021	0.999	0.996	1.85917e-41	2.52406e-57	0.766804	1	0.999	8.78169e-53	1.83699e-48	0.489927	1	1	6.39127e-44	5.34367e-46	1.00962e-56
Jak2	1.04773e-35	0.46777	0.616	0.268	3.64525e-31	1.77776e-33	0.47027	0.229	0.096	6.18518e-29	3.04296e-56	0.848815	0.832	0.445	1.05871e-51	1.59924e-35	0.437056	0.495	0.176	5.56407e-31	1.77776e-33	1.21718e-55
Ahcyl2	4.44052e-32	0.520421	0.689	0.349	1.54495e-27	9.79016e-25	0.512298	0.259	0.133	3.40619e-20	5.00565e-54	0.718662	0.818	0.407	1.74157e-49	5.02033e-40	0.523913	0.566	0.214	1.74667e-35	9.79016e-25	2.00226e-53
Rps27l	7.2722e-29	0.47774	0.906	0.634	2.53014e-24	9.89814e-53	0.634299	0.73	0.501	3.44376e-48	4.20879e-18	0.299803	0.903	0.706	1.46432e-13	2.65125e-14	0.309163	0.942	0.817	9.22421e-10	2.65125e-14	3.95925e-52
Tspan13	3.87054e-52	0.430684	0.689	0.282	1.34664e-47	3.09038e-36	0.432503	0.282	0.133	1.07521e-31	1.50989e-34	0.317245	0.462	0.183	5.2532e-30	3.17131e-51	0.575226	0.656	0.241	1.10336e-46	1.50989e-34	1.54822e-51
Sod1	2.675e-32	0.560486	0.761	0.422	9.30685e-28	1.06551e-19	0.304118	0.321	0.199	3.70711e-15	1.35592e-51	0.730128	0.869	0.518	4.7175e-47	1.48532e-25	0.476036	0.775	0.506	5.16772e-21	1.06551e-19	5.42366e-51
Fbl	2.74581e-46	0.650362	0.792	0.397	9.55323e-42	9.30729e-51	0.675616	0.401	0.191	3.23819e-46	2.92254e-18	0.420273	0.761	0.539	1.01681e-13	1.01827e-47	0.651517	0.878	0.552	3.54275e-43	2.92254e-18	3.72292e-50
Mpp6	7.34556e-45	0.602809	0.752	0.35	2.55567e-40	3.86416e-14	0.356439	0.216	0.126	1.34442e-09	3.85103e-27	0.371405	0.527	0.246	1.33985e-22	1.2238e-50	0.69548	0.823	0.467	4.25783e-46	3.86416e-14	4.89518e-50
Psma4	5.16703e-28	0.434086	0.868	0.574	1.79771e-23	1.09839e-19	0.264566	0.394	0.264	3.82152e-15	6.05433e-49	0.73283	0.875	0.606	2.10642e-44	8.95764e-23	0.385784	0.955	0.785	3.11654e-18	1.09839e-19	2.42173e-48
Smdt1	1.08032e-35	0.610539	0.931	0.686	3.75866e-31	2.86446e-32	0.42202	0.606	0.417	9.96604e-28	2.23126e-48	0.722436	0.912	0.651	7.763e-44	1.25701e-25	0.439532	0.968	0.847	4.3734e-21	1.25701e-25	8.92503e-48
Myo1g	2.35521e-31	0.489771	0.717	0.38	8.19425e-27	8.28254e-14	0.251266	0.225	0.137	2.88166e-09	2.28628e-47	0.595034	0.758	0.368	7.95442e-43	2.55546e-48	0.57351	0.785	0.376	8.89096e-44	8.28254e-14	1.02218e-47
Pmaip1	4.29117e-47	0.989878	0.503	0.155	1.49298e-42	5.62019e-16	0.391222	0.245	0.144	1.95538e-11	1.0917e-35	0.81991	0.538	0.233	3.79823e-31	1.96338e-44	0.655837	0.55	0.186	6.83099e-40	5.62019e-16	1.71647e-46
Sdf2l1	5.10025e-29	0.469793	0.711	0.387	1.77448e-24	5.00697e-39	0.618074	0.401	0.214	1.74202e-34	5.48724e-28	0.478448	0.55	0.26	1.90912e-23	6.78391e-47	0.7343	0.836	0.499	2.36026e-42	5.48724e-28	2.71357e-46
Calm1	1.36558e-23	0.423619	0.994	0.954	4.75112e-19	5.7345e-31	0.286504	0.908	0.777	1.99515e-26	1.66088e-46	0.61922	0.986	0.933	5.77853e-42	1.62387e-16	0.261663	1	0.984	5.64977e-12	1.62387e-16	6.64352e-46
Vim	3.98906e-46	0.927564	0.994	0.913	1.38787e-41	2.45243e-43	0.259604	0.897	0.719	8.5325e-39	1.64844e-36	0.689731	0.912	0.671	5.73525e-32	8.29636e-33	0.588945	1	0.97	2.88647e-28	8.29636e-33	1.59562e-45
Rps4x	3.41945e-24	0.404107	0.997	0.957	1.18969e-19	1.24868e-43	0.358936	0.946	0.847	4.3444e-39	3.18035e-16	0.326196	0.983	0.927	1.10651e-11	1.68672e-45	0.486964	0.997	0.985	5.86844e-41	3.18035e-16	6.74688e-45
Qpct	5.13866e-36	0.507455	0.594	0.251	1.78784e-31	3.32494e-07	0.256636	0.241	0.172	0.0115681	3.50654e-29	0.594358	0.379	0.143	1.22e-24	6.99585e-44	0.707065	0.621	0.26	2.434e-39	3.32494e-07	2.79834e-43
Ndufa6	8.98466e-27	0.535268	0.899	0.687	3.12594e-22	1.19779e-42	0.54977	0.654	0.438	4.16736e-38	5.01938e-31	0.557987	0.826	0.582	1.74634e-26	4.26591e-19	0.398684	0.91	0.733	1.4842e-14	4.26591e-19	4.79117e-42
Tuba1a	2.19283e-41	0.810653	0.811	0.451	7.62931e-37	2.16478e-14	0.353675	0.326	0.217	7.5317e-10	3.188e-22	0.300055	0.533	0.282	1.10917e-17	3.68615e-33	0.652614	0.759	0.451	1.28249e-28	2.16478e-14	8.77134e-41
S100a10	1.11832e-18	0.346418	0.984	0.847	3.89086e-14	8.82777e-41	0.29351	0.876	0.697	3.07136e-36	5.57082e-41	0.757731	0.963	0.798	1.9382e-36	1.03745e-39	0.703025	0.987	0.876	3.60949e-35	1.11832e-18	2.22833e-40
Dock10	1.92493e-34	0.380531	0.852	0.517	6.6972e-30	1.55136e-15	0.32272	0.286	0.179	5.3975e-11	1.04517e-39	0.714953	0.923	0.672	3.63637e-35	1.3937e-33	0.577498	0.791	0.481	4.84898e-29	1.55136e-15	4.1807e-39
H13	6.41387e-35	0.447759	0.786	0.434	2.23151e-30	5.91136e-21	0.359339	0.292	0.169	2.05668e-16	2.09256e-17	0.352134	0.746	0.516	7.28042e-13	1.42341e-38	0.589105	0.736	0.384	4.95233e-34	2.09256e-17	5.69364e-38
Slk	5.78593e-37	0.453785	0.777	0.414	2.01304e-32	9.00476e-15	0.267428	0.221	0.13	3.13294e-10	4.81857e-27	0.50213	0.764	0.49	1.67648e-22	2.14397e-17	0.366506	0.72	0.481	7.45932e-13	9.00476e-15	2.31437e-36
4930523C07Rik	3.10692e-36	0.424106	0.799	0.445	1.08096e-31	1.71137e-30	0.459119	0.285	0.142	5.9542e-26	3.4254e-25	0.371807	0.618	0.337	1.19177e-20	7.71966e-30	0.361182	0.437	0.161	2.68582e-25	3.4254e-25	1.24277e-35
Csf2rb	3.03434e-34	0.365115	0.642	0.306	1.05571e-29	1.82555e-13	0.255544	0.215	0.131	6.35144e-09	1.22898e-16	0.410345	0.704	0.48	4.27587e-12	1.47788e-16	0.310404	0.672	0.429	5.14183e-12	1.82555e-13	1.21374e-33
Uqcc2	2.10201e-33	0.359084	0.742	0.401	7.31332e-29	5.01775e-17	0.36324	0.355	0.234	1.74578e-12	9.09148e-17	0.329116	0.667	0.434	3.16311e-12	5.70758e-13	0.260977	0.752	0.544	1.98578e-08	5.70758e-13	8.40805e-33
Arf5	2.47323e-18	0.350713	0.956	0.841	8.60487e-14	5.02082e-33	0.368212	0.713	0.525	1.74684e-28	1.86793e-21	0.377617	0.94	0.796	6.49892e-17	1.51411e-30	0.447743	0.974	0.886	5.26789e-26	2.47323e-18	2.00833e-32
Psma7	1.75358e-21	0.330551	0.95	0.748	6.10106e-17	1.52309e-28	0.285103	0.68	0.507	5.29914e-24	3.61192e-19	0.409401	0.903	0.742	1.25666e-14	6.3664e-33	0.491127	0.974	0.857	2.215e-28	3.61192e-19	2.54656e-32
Sec61g	1.96093e-20	0.338828	0.95	0.757	6.82247e-16	1.17169e-32	0.351691	0.794	0.618	4.07655e-28	3.05907e-17	0.36122	0.929	0.777	1.06431e-12	2.02198e-28	0.453598	0.987	0.92	7.03488e-24	3.05907e-17	4.68677e-32
Rpl39	9.24125e-15	0.285	0.987	0.954	3.21521e-10	1.28393e-26	0.260323	0.942	0.853	4.46706e-22	3.41547e-14	0.296782	0.969	0.923	1.18831e-09	8.21746e-30	0.37732	1	0.99	2.85902e-25	3.41547e-14	3.28698e-29
Ppib	3.16088e-15	0.263293	0.956	0.809	1.09973e-10	2.62189e-18	0.293236	0.454	0.319	9.12206e-14	1.04727e-22	0.456774	0.858	0.654	3.64365e-18	1.24516e-29	0.44636	0.987	0.908	4.33216e-25	3.16088e-15	4.98064e-29
Dek	5.95635e-21	0.338981	0.852	0.599	2.07233e-16	1.60559e-29	0.450269	0.359	0.202	5.58617e-25	3.16529e-17	0.479452	0.735	0.55	1.10127e-12	2.00188e-11	0.312271	0.91	0.774	6.96495e-07	2.00188e-11	6.42236e-29
Rpl10	5.467e-17	0.360838	0.975	0.911	1.90208e-12	6.18685e-29	0.302698	0.922	0.815	2.15253e-24	1.23933e-14	0.313455	0.957	0.837	4.31187e-10	4.01027e-19	0.307847	0.994	0.972	1.39525e-14	1.23933e-14	2.47474e-28
Eif3k	8.08705e-18	0.348677	0.921	0.735	2.81365e-13	9.7093e-29	0.31534	0.55	0.377	3.37806e-24	5.37426e-19	0.331076	0.855	0.636	1.86981e-14	3.80952e-25	0.43714	0.945	0.826	1.32541e-20	8.08705e-18	3.88372e-28
Cycs	2.78008e-24	0.387311	0.77	0.479	9.67244e-20	4.30615e-24	0.305883	0.473	0.32	1.49819e-19	1.09595e-08	0.272485	0.778	0.636	0.000381302	1.95726e-21	0.462586	0.836	0.607	6.80971e-17	1.09595e-08	1.11203e-23
Rpl36al	7.02679e-20	0.342931	0.953	0.777	2.44476e-15	4.60859e-24	0.251668	0.695	0.537	1.60342e-19	3.61092e-18	0.347903	0.969	0.86	1.25631e-13	1.60479e-23	0.400175	0.955	0.793	5.58338e-19	3.61092e-18	1.84344e-23
Pitpna	1.58523e-23	0.377266	0.937	0.712	5.51535e-19	3.26811e-23	0.273143	0.548	0.394	1.13704e-18	1.79839e-22	0.47183	0.917	0.771	6.25697e-18	4.68099e-20	0.375445	0.968	0.833	1.62861e-15	4.68099e-20	6.34094e-23
Pdia3	4.97502e-16	0.320159	0.921	0.738	1.73091e-11	2.81077e-20	0.293865	0.548	0.402	9.77923e-16	2.44754e-14	0.372483	0.9	0.744	8.51549e-10	2.5349e-18	0.413914	0.968	0.842	8.81941e-14	2.44754e-14	1.12431e-19

## Sheet: C4
	Exp_1_(S005)_p_val	S005_avg_log2FC	S005_pct.1	S005_pct.2	S005_p_val_adj	Exp_2_(SP024)_p_val	SP024_avg_log2FC	SP024_pct.1	SP024_pct.2	SP024_p_val_adj	Exp_3_(LPS)_p_val	LPS_avg_log2FC	LPS_pct.1	LPS_pct.2	LPS_p_val_adj	Exp_4_(S006)_p_val	S006_avg_log2FC	S006_pct.1	S006_pct.2	S006_p_val_adj	max_pval	minimump_p_val
Capg	0	1.42305	0.925	0.706	0	1.638e-16	0.382915	0.404	0.464	5.69894e-12	4.12717e-18	0.546318	0.706	0.583	1.43592e-13	7.97941e-11	0.352227	0.668	0.759	2.7762e-06	7.97941e-11	0
Cd3d	0	3.00822	0.924	0.075	0	1.56545e-161	2.87091	0.456	0.007	5.44652e-157	3.99389e-276	2.62251	0.691	0.021	1.38955e-271	2.05369e-136	2.33491	0.541	0.021	7.14519e-132	2.05369e-136	0
Cd3e	0	2.94	0.923	0.061	0	2.29329e-132	2.4883	0.369	0.005	7.97883e-128	2.52696e-292	2.44265	0.715	0.019	8.79181e-288	9.45178e-152	1.79666	0.541	0.012	3.28846e-147	2.29329e-132	0
Cd3g	0	3.22131	0.967	0.118	0	8.15024e-149	2.80959	0.439	0.008	2.83563e-144	1.4424e-247	2.3659	0.7	0.03	5.01841e-243	2.72657e-207	2.69713	0.827	0.041	9.48629e-203	8.15024e-149	0
Cxcr6	0	3.29754	0.893	0.156	0	6.81552e-91	2.64049	0.3	0.008	2.37125e-86	2.93886e-180	2.44129	0.555	0.034	1.02249e-175	3.53171e-147	2.3135	0.591	0.023	1.22875e-142	6.81552e-91	0
Ets1	0	1.81487	0.945	0.308	0	1.79284e-130	2.80566	0.606	0.061	6.23766e-126	6.53543e-241	2.53988	0.942	0.177	2.27381e-236	8.56093e-164	2.01497	0.864	0.122	2.97852e-159	1.79284e-130	0
Icos	0	1.9624	0.661	0.11	0	2.642e-127	2.97648	0.394	0.012	9.19203e-123	1.54355e-269	2.854	0.745	0.041	5.37033e-265	1.02362e-100	1.55015	0.477	0.035	3.56137e-96	1.02362e-100	0
Lat	0	2.18236	0.809	0.13	0	2.59377e-120	2.42646	0.39	0.01	9.02424e-116	4.04331e-190	1.88439	0.661	0.058	1.40675e-185	3.04845e-125	1.53234	0.664	0.071	1.06062e-120	2.59377e-120	0
Ltb	0	1.87063	0.861	0.312	0	1.57255e-70	2.28402	0.345	0.032	5.47121e-66	1.49021e-88	1.57058	0.606	0.134	5.18474e-84	2.00968e-139	2.19206	0.791	0.1	6.99208e-135	1.57255e-70	0
Ptprcap	0	1.95008	0.918	0.268	0	7.1656e-75	2.17932	0.362	0.03	2.49306e-70	1.05456e-142	1.81654	0.664	0.091	3.66902e-138	2.91176e-171	2.14142	0.923	0.129	1.01306e-166	7.1656e-75	0
Thy1	0	2.27543	0.879	0.175	0	1.01399e-95	2.4892	0.345	0.015	3.52789e-91	7.03883e-199	2.32317	0.709	0.067	2.44895e-194	4.98214e-227	2.08076	0.814	0.026	1.73339e-222	1.01399e-95	0
Lgals1	1.84148e-319	1.45126	0.951	0.794	6.40688e-315	7.55345e-74	1.38225	0.652	0.625	2.62799e-69	1.42637e-110	1.66926	0.824	0.632	4.96264e-106	0.745104	0.364744	0.955	0.944	1	0.745104	7.36593e-319
Ncor1	1.20739e-301	1.23169	0.905	0.69	4.20076e-297	1.68425e-24	1.12722	0.258	0.154	5.85983e-20	4.08036e-94	1.11414	0.809	0.63	1.41964e-89	2.47458e-35	0.73652	0.891	0.721	8.60955e-31	1.68425e-24	4.82957e-301
H2-Q7	1.64898e-297	1.54377	0.888	0.507	5.73712e-293	1.3383e-43	1.49555	0.408	0.205	4.65623e-39	1.52349e-119	1.4045	0.912	0.632	5.30052e-115	3.51826e-50	1.04351	0.305	0.156	1.22407e-45	1.3383e-43	6.59591e-297
Id2	3.01146e-286	1.56409	0.916	0.5	1.04775e-281	5.56374e-35	1.36318	0.429	0.289	1.93574e-30	4.40038e-110	1.60714	0.93	0.616	1.53098e-105	7.30534e-05	0.380107	0.573	0.491	1	7.30534e-05	1.20458e-285
Rora	2.76917e-283	1.50582	0.73	0.197	9.63449e-279	3.94778e-79	2.42205	0.359	0.029	1.37351e-74	3.03621e-161	2.25871	0.776	0.146	1.05636e-156	3.7452e-117	1.85815	0.595	0.103	1.30303e-112	3.94778e-79	1.10767e-282
Il7r	4.24048e-273	1.6956	0.828	0.343	1.47535e-268	7.93627e-80	2.27612	0.397	0.084	2.76119e-75	2.0932e-115	1.94605	0.833	0.295	7.28266e-111	2.15204e-117	1.95673	0.659	0.097	7.48738e-113	7.93627e-80	1.69619e-272
Ikzf2	5.03765e-266	1.77129	0.634	0.153	1.7527e-261	1.19914e-85	2.98436	0.282	0.011	4.17204e-81	2.6532e-165	2.80644	0.612	0.082	9.231e-161	1.13714e-91	1.58022	0.691	0.125	3.95633e-87	1.19914e-85	2.01506e-265
Cd82	6.2555e-259	1.38838	0.759	0.419	2.17641e-254	8.61938e-38	1.58938	0.265	0.066	2.99886e-33	6.7224e-127	1.65834	0.721	0.319	2.33886e-122	2.76852e-56	1.16872	0.605	0.253	9.63224e-52	8.61938e-38	2.5022e-258
Spcs2	3.06237e-250	1.06433	0.855	0.67	1.06546e-245	4.88388e-13	0.323421	0.247	0.292	1.6992e-08	4.52732e-27	0.462422	0.633	0.624	1.57515e-22	3.63052e-53	0.789429	0.914	0.812	1.26313e-48	4.88388e-13	1.22495e-249
Aebp2	5.34723e-246	1.24571	0.663	0.328	1.86041e-241	4.85271e-26	1.29557	0.237	0.087	1.68836e-21	3.88341e-130	1.42736	0.785	0.48	1.35112e-125	4.93613e-49	0.882352	0.6	0.294	1.71738e-44	4.85271e-26	2.13889e-245
H2-K1	4.40741e-239	0.976452	0.998	0.963	1.53343e-234	3.73824e-47	0.92418	0.812	0.774	1.30061e-42	3.92938e-60	0.75361	0.997	0.992	1.36711e-55	9.7627e-11	0.692144	0.9	0.93	3.39664e-06	9.7627e-11	1.76296e-238
Emb	3.74109e-224	1.23602	0.875	0.556	1.3016e-219	1.00458e-48	1.43216	0.383	0.226	3.49515e-44	5.53645e-95	1.75329	0.818	0.481	1.92624e-90	1.16885e-100	1.70455	0.9	0.484	4.06665e-96	1.00458e-48	1.49644e-223
Ccnd2	8.82531e-209	1.23855	0.811	0.361	3.0705e-204	9.21365e-23	1.10109	0.279	0.189	3.20561e-18	1.29087e-45	0.848625	0.9	0.596	4.49118e-41	4.66293e-63	1.20211	0.723	0.199	1.62233e-58	9.21365e-23	3.53012e-208
Prkar1a	1.74267e-192	0.858893	0.796	0.654	6.06309e-188	5.58296e-15	0.589934	0.282	0.265	1.94242e-10	6.18866e-63	0.821198	0.742	0.653	2.15316e-58	1.36632e-24	0.522819	0.8	0.719	4.75368e-20	5.58296e-15	6.97067e-192
Cd28	1.18905e-118	1.08318	0.336	0.09	4.13696e-114	2.56428e-78	2.18458	0.251	0.006	8.92165e-74	2.49258e-192	2.14217	0.548	0.023	8.67218e-188	1.57517e-43	0.829789	0.345	0.064	5.48033e-39	1.57517e-43	9.97032e-192
Anxa6	2.77703e-190	0.953981	0.774	0.597	9.66185e-186	6.8846e-21	0.961037	0.223	0.134	2.39529e-16	8.04829e-40	0.705673	0.712	0.64	2.80016e-35	1.52665e-10	0.415111	0.759	0.709	5.31153e-06	1.52665e-10	1.11081e-189
Tmsb10	1.71236e-173	0.886179	0.97	0.73	5.95766e-169	2.17224e-108	1.47627	0.979	0.793	7.55766e-104	4.96852e-118	1.72345	0.921	0.615	1.72865e-113	5.02771e-140	2.27489	0.991	0.781	1.74924e-135	2.17224e-108	6.84946e-173
Anp32a	8.80842e-172	0.780108	0.858	0.767	3.06463e-167	1.1383e-20	0.678233	0.331	0.31	3.96037e-16	2.24142e-63	0.8381	0.7	0.571	7.79835e-59	1.61119e-26	0.547362	0.941	0.852	5.60566e-22	1.1383e-20	3.52337e-171
Ms4a4b	2.04515e-142	1.59608	0.446	0.118	7.11547e-138	4.06441e-79	2.52279	0.334	0.022	1.41409e-74	1.17451e-166	2.27566	0.576	0.149	4.08637e-162	1.35593e-44	1.93629	0.309	0.044	4.71756e-40	1.35593e-44	4.69805e-166
Krtcap2	8.5725e-166	0.845104	0.728	0.582	2.98255e-161	4.61941e-20	0.739239	0.265	0.233	1.60719e-15	4.92696e-25	0.437199	0.591	0.586	1.71419e-20	3.99682e-26	0.619509	0.809	0.672	1.39057e-21	4.61941e-20	3.429e-165
Dad1	4.49452e-163	0.830591	0.847	0.705	1.56373e-158	9.58617e-21	0.522352	0.317	0.358	3.33522e-16	2.67264e-24	0.44077	0.721	0.691	9.29863e-20	5.1847e-60	0.977177	0.895	0.795	1.80386e-55	9.58617e-21	1.79781e-162
Shisa5	6.89017e-163	0.991622	0.899	0.731	2.39723e-158	2.65131e-40	1.13081	0.467	0.34	9.22444e-36	7.8034e-65	0.920528	0.909	0.845	2.71496e-60	2.64086e-17	0.64683	0.773	0.721	9.18808e-13	2.64086e-17	2.75607e-162
AW112010	3.92014e-160	1.3425	0.683	0.299	1.3639e-155	1.63006e-52	2.09549	0.429	0.123	5.67132e-48	8.49669e-18	0.513947	0.836	0.702	2.95617e-13	4.59754e-47	1.6068	0.373	0.055	1.59958e-42	8.49669e-18	1.56806e-159
Saraf	7.35501e-160	0.914206	0.701	0.544	2.55895e-155	8.00132e-40	1.4159	0.282	0.133	2.78382e-35	5.28289e-59	0.835075	0.57	0.435	1.83802e-54	2.01389e-42	0.816345	0.755	0.568	7.00673e-38	8.00132e-40	2.942e-159
Rpsa	2.66365e-72	0.428883	0.998	0.94	9.26736e-68	4.49016e-23	0.465751	0.711	0.761	1.56222e-18	5.98563e-20	0.423378	0.961	0.954	2.08252e-15	5.6219e-157	1.34363	0.995	0.983	1.95597e-152	5.98563e-20	2.24876e-156
Rgcc	1.06502e-29	0.402017	0.449	0.285	3.70543e-25	2.15057e-07	0.677526	0.233	0.184	0.00748225	3.53121e-11	0.28195	0.373	0.203	1.22858e-06	1.83115e-150	2.38915	0.814	0.114	6.37093e-146	2.15057e-07	7.3246e-150
Odc1	2.78503e-146	1.0474	0.434	0.192	9.68966e-142	6.4026e-44	1.75622	0.289	0.096	2.22759e-39	9.05876e-103	1.3742	0.485	0.235	3.15172e-98	5.24075e-76	1.31158	0.614	0.284	1.82336e-71	6.4026e-44	1.11401e-145
Rac2	3.68972e-146	0.799656	0.941	0.748	1.28373e-141	7.44182e-41	1.18449	0.449	0.293	2.58916e-36	4.432e-61	0.949646	0.821	0.673	1.54198e-56	2.6812e-63	0.943857	1	0.9	9.32841e-59	7.44182e-41	1.47589e-145
Ptpn22	3.07519e-121	0.931341	0.541	0.279	1.06992e-116	6.25367e-57	2.04654	0.314	0.069	2.17578e-52	6.59116e-146	1.84508	0.739	0.205	2.2932e-141	9.38474e-35	0.701439	0.414	0.114	3.26514e-30	9.38474e-35	2.63646e-145
Il2rg	3.79908e-145	0.984264	0.712	0.37	1.32178e-140	7.22693e-26	1.23596	0.247	0.105	2.5144e-21	2.94552e-57	0.870567	0.673	0.529	1.0248e-52	4.62004e-62	1.14717	0.764	0.272	1.60741e-57	7.22693e-26	1.51963e-144
Cd2	6.33582e-86	0.853955	0.431	0.267	2.20436e-81	7.18207e-35	1.30782	0.293	0.15	2.49879e-30	1.8834e-143	1.55493	0.527	0.085	6.55272e-139	2.92659e-56	1.08286	0.445	0.064	1.01822e-51	7.18207e-35	7.53359e-143
Oaz1	5.60017e-142	0.587814	0.989	0.961	1.94841e-137	3.21167e-24	0.546102	0.791	0.77	1.11741e-19	6.55972e-62	0.711259	0.903	0.882	2.28226e-57	1.64871e-37	0.54186	0.991	0.983	5.73619e-33	3.21167e-24	2.24007e-141
Ndufv3	6.71082e-142	0.724082	0.67	0.554	2.33483e-137	1.19426e-14	0.407637	0.22	0.256	4.15508e-10	2.03524e-36	0.534147	0.524	0.475	7.08101e-32	1.62224e-23	0.519592	0.805	0.707	5.64411e-19	1.19426e-14	2.68433e-141
Arl6ip5	1.37467e-140	0.772294	0.723	0.561	4.78274e-136	2.99597e-17	0.560394	0.192	0.21	1.04236e-12	2.79851e-33	0.576994	0.515	0.422	9.73659e-29	8.08074e-08	0.37988	0.732	0.623	0.00281145	8.08074e-08	5.49867e-140
Hcst	1.19145e-139	1.01612	0.705	0.389	4.14529e-135	3.16851e-53	1.76468	0.411	0.132	1.10239e-48	7.46363e-100	1.5609	0.633	0.231	2.59675e-95	1.5902e-49	1.12876	0.727	0.395	5.53261e-45	1.5902e-49	4.7658e-139
Rplp0	1.58549e-59	0.39564	0.993	0.944	5.51625e-55	2.30857e-32	0.696596	0.805	0.803	8.03198e-28	1.5299e-10	0.269629	0.915	0.935	5.32285e-06	5.35227e-129	1.23753	1	0.986	1.86216e-124	1.5299e-10	2.14091e-128
Rps15a	9.50268e-128	0.637842	0.996	0.94	3.30617e-123	9.8954e-71	1.09861	0.871	0.82	3.44281e-66	8.77227e-50	0.740662	0.936	0.907	3.05205e-45	7.23766e-119	1.05785	0.995	0.983	2.51813e-114	8.77227e-50	3.80107e-127
Sumo2	1.24623e-125	0.661308	0.897	0.805	4.33587e-121	1.13217e-26	0.718459	0.387	0.368	3.93906e-22	9.0918e-25	0.36597	0.718	0.752	3.16322e-20	1.50679e-39	0.66875	0.959	0.907	5.24242e-35	9.0918e-25	4.98491e-125
Nkg7	5.61044e-125	1.01925	0.517	0.165	1.95199e-120	4.17691e-49	2.14739	0.282	0.029	1.45323e-44	6.09411e-72	1.66982	0.379	0.048	2.12026e-67	2.79672e-71	1.7981	0.505	0.061	9.73036e-67	4.17691e-49	2.24418e-124
Cbx3	6.77191e-125	0.727225	0.663	0.543	2.35608e-120	7.28186e-12	0.461435	0.23	0.239	2.5335e-07	1.50735e-78	1.00906	0.63	0.405	5.24439e-74	5.91409e-49	0.822229	0.791	0.608	2.05763e-44	7.28186e-12	2.70876e-124
Ndufa1	9.63583e-124	0.752064	0.618	0.598	3.3525e-119	5.61738e-20	0.475278	0.282	0.326	1.9544e-15	2.82194e-21	0.26276	0.488	0.535	9.81808e-17	8.0193e-14	0.399857	0.786	0.687	2.79008e-09	8.0193e-14	3.85433e-123
Rpl12	7.51718e-90	0.594183	0.984	0.892	2.61538e-85	6.71301e-55	1.03125	0.571	0.556	2.33559e-50	3.24957e-37	0.670814	0.933	0.9	1.13059e-32	7.9597e-119	1.14462	0.986	0.961	2.76934e-114	3.24957e-37	3.18388e-118
Pdcd4	4.08175e-115	0.902233	0.64	0.409	1.42012e-110	4.75092e-29	1.17793	0.286	0.195	1.65294e-24	2.03926e-99	1.60992	0.715	0.23	7.095e-95	4.25325e-21	0.73601	0.518	0.252	1.47979e-16	4.25325e-21	1.6327e-114
Tnfrsf18	2.40727e-46	0.734099	0.307	0.208	8.37539e-42	1.60249e-40	1.66065	0.206	0.032	5.5754e-36	1.09373e-114	1.79718	0.497	0.094	3.80529e-110	2.29361e-33	0.599132	0.25	0.029	7.97993e-29	2.29361e-33	4.3749e-114
Rpl19	4.74954e-88	0.480061	0.995	0.956	1.65246e-83	1.237e-44	0.836653	0.861	0.805	4.30377e-40	1.45958e-25	0.461088	0.958	0.954	5.07818e-21	2.44226e-110	0.932338	0.991	0.989	8.4971e-106	1.45958e-25	9.76902e-110
Eno1	4.35956e-110	0.630777	0.623	0.53	1.51678e-105	5.60294e-19	0.401597	0.293	0.352	1.94937e-14	6.54083e-21	0.356613	0.509	0.521	2.27569e-16	1.27397e-18	0.527533	0.814	0.73	4.43239e-14	1.27397e-18	1.74382e-109
Rps3	8.97414e-40	0.286969	0.993	0.949	3.12228e-35	2.80642e-24	0.576896	0.871	0.853	9.7641e-20	6.90359e-15	0.381683	0.933	0.911	2.4019e-10	4.72781e-110	0.936884	0.991	0.984	1.6449e-105	6.90359e-15	1.89112e-109
S100a13	2.46559e-108	0.614149	0.78	0.707	8.57827e-104	4.29235e-22	0.559664	0.415	0.423	1.4934e-17	9.59926e-44	0.675187	0.667	0.608	3.33978e-39	8.98413e-07	0.310092	0.773	0.754	0.0312576	8.98413e-07	9.86235e-108
Rps10	4.60272e-44	0.315053	0.995	0.97	1.60138e-39	3.76476e-27	0.495035	0.686	0.74	1.30983e-22	6.89101e-21	0.448261	0.948	0.942	2.39752e-16	4.61358e-107	0.92681	0.991	0.99	1.60516e-102	6.89101e-21	1.84543e-106
Ywhaq	6.008e-107	0.614993	0.741	0.649	2.0903e-102	1.60929e-12	0.519901	0.233	0.221	5.59903e-08	4.00072e-41	0.571767	0.612	0.593	1.39193e-36	3.03236e-19	0.481327	0.85	0.778	1.05502e-14	1.60929e-12	2.4032e-106
Prr13	5.72403e-106	0.633326	0.832	0.75	1.99151e-101	1.41475e-15	0.534319	0.352	0.351	4.92219e-11	9.1072e-40	0.742301	0.655	0.498	3.16858e-35	3.74639e-06	0.331541	0.773	0.703	0.130344	3.74639e-06	2.28961e-105
Vps37b	5.45277e-11	0.293428	0.333	0.31	1.89713e-06	8.51297e-63	2.16318	0.443	0.103	2.96183e-58	1.53286e-25	1.01449	0.358	0.17	5.33312e-21	8.79073e-106	1.75017	0.809	0.377	3.05847e-101	5.45277e-11	3.51629e-105
Eif3h	1.30761e-104	0.636737	0.868	0.753	4.54945e-100	1.63264e-26	0.829929	0.373	0.314	5.68027e-22	1.79337e-46	0.590404	0.612	0.598	6.2395e-42	5.73603e-87	0.97206	0.986	0.849	1.99568e-82	1.63264e-26	5.23045e-104
Supt4a	7.81619e-104	0.582895	0.668	0.607	2.71941e-99	1.76791e-11	0.583718	0.226	0.199	6.1509e-07	6.63323e-38	0.630347	0.491	0.381	2.30783e-33	1.26869e-22	0.576696	0.786	0.643	4.41401e-18	1.76791e-11	3.12648e-103
Rps13	2.91116e-65	0.428356	0.992	0.958	1.01285e-60	5.22482e-31	0.631576	0.843	0.812	1.81782e-26	1.28687e-28	0.528071	0.939	0.918	4.47728e-24	1.32602e-103	0.936942	0.991	0.986	4.61349e-99	1.28687e-28	5.30408e-103
Rpl18	7.69078e-49	0.374638	0.989	0.94	2.67578e-44	3.26267e-37	0.779776	0.784	0.732	1.13515e-32	4.2055e-15	0.394132	0.93	0.92	1.46318e-10	2.3223e-100	0.949359	0.991	0.982	8.07974e-96	4.2055e-15	9.28919e-100
Rpl9	3.56121e-53	0.34068	0.995	0.964	1.23902e-48	7.82094e-40	0.751166	0.847	0.827	2.72106e-35	6.74414e-19	0.422782	0.93	0.914	2.34642e-14	3.51714e-99	0.862745	0.995	0.991	1.22368e-94	6.74414e-19	1.40686e-98
H2-T23	8.9558e-99	0.67725	0.841	0.741	3.1159e-94	1.55699e-21	0.579251	0.314	0.337	5.41708e-17	2.45928e-24	0.543681	0.833	0.817	8.55632e-20	0.0017781	0.286449	0.482	0.426	1	0.0017781	3.58232e-98
Cnbp	1.56056e-98	0.595457	0.852	0.778	5.4295e-94	7.55314e-20	0.7386	0.338	0.292	2.62789e-15	7.89576e-26	0.400473	0.648	0.675	2.74709e-21	6.21419e-41	0.683088	0.941	0.864	2.16204e-36	7.55314e-20	6.24223e-98
Hmgb1	2.33778e-98	0.664873	0.923	0.84	8.1336e-94	5.68273e-20	0.437849	0.446	0.498	1.97714e-15	1.62041e-63	0.940174	0.767	0.694	5.63774e-59	6.78494e-66	1.19155	0.973	0.914	2.36062e-61	5.68273e-20	9.35111e-98
Aldoa	8.39185e-98	0.703005	0.862	0.782	2.91969e-93	2.96059e-20	0.459896	0.317	0.362	1.03005e-15	4.93866e-22	0.404365	0.673	0.753	1.71826e-17	1.50521e-06	0.272702	0.868	0.863	0.0523692	1.50521e-06	3.35674e-97
Tma7	2.94218e-96	0.552987	0.81	0.757	1.02364e-91	1.81977e-20	0.448695	0.397	0.446	6.33136e-16	2.46846e-23	0.320979	0.655	0.707	8.58828e-19	4.79524e-10	0.330873	0.9	0.85	1.66836e-05	4.79524e-10	1.17687e-95
Ppp1ca	3.03719e-96	0.54767	0.854	0.795	1.0567e-91	1.43818e-12	0.258949	0.275	0.327	5.0037e-08	8.36063e-33	0.474104	0.67	0.658	2.90883e-28	1.3587e-26	0.508002	0.936	0.897	4.7272e-22	1.43818e-12	1.21487e-95
Rpl18a	7.02748e-32	0.264786	0.993	0.958	2.445e-27	7.53242e-49	0.831557	0.934	0.916	2.62068e-44	1.87747e-53	0.758095	0.964	0.922	6.53208e-49	2.3039e-95	0.945462	0.986	0.984	8.01574e-91	7.02748e-32	9.21561e-95
Park7	4.32902e-95	0.558193	0.683	0.622	1.50615e-90	3.32785e-13	0.370099	0.206	0.243	1.15782e-08	8.78072e-23	0.296247	0.418	0.456	3.05499e-18	1.4522e-29	0.564159	0.864	0.78	5.05249e-25	3.32785e-13	1.73161e-94
Rps16	2.03725e-65	0.422441	0.995	0.98	7.08801e-61	5.61139e-31	0.710453	0.913	0.886	1.95231e-26	5.2764e-29	0.515623	0.955	0.954	1.83577e-24	5.94194e-95	0.865105	1	0.991	2.06732e-90	5.2764e-29	2.37678e-94
Rpl41	6.59097e-44	0.298881	0.994	0.981	2.29313e-39	3.09499e-24	0.511173	0.979	0.972	1.07681e-19	1.65279e-17	0.42303	0.97	0.964	5.75039e-13	6.7828e-95	0.85513	0.991	0.993	2.35987e-90	1.65279e-17	2.71312e-94
Rpl36a	1.07284e-20	0.278786	0.912	0.845	3.73263e-16	3.92419e-28	0.627215	0.714	0.736	1.3653e-23	2.08414e-15	0.380908	0.83	0.823	7.25115e-11	8.4465e-95	1.02205	0.982	0.944	2.93871e-90	2.08414e-15	3.3786e-94
Rpl11	8.06203e-79	0.446189	0.993	0.934	2.80494e-74	2.71935e-30	0.611668	0.801	0.801	9.46118e-26	9.04138e-11	0.314315	0.93	0.928	3.14568e-06	2.00505e-94	0.881288	0.995	0.983	6.97595e-90	9.04138e-11	8.02018e-94
Selplg	2.65476e-91	0.644903	0.865	0.741	9.23644e-87	2.0505e-16	0.654016	0.324	0.283	7.1341e-12	5.06289e-25	0.664881	0.688	0.547	1.76148e-20	3.35386e-40	0.87352	0.818	0.546	1.16687e-35	2.0505e-16	1.0619e-90
Gnas	3.20195e-90	0.58005	0.92	0.847	1.11402e-85	2.05387e-20	0.346178	0.268	0.361	7.14583e-16	9.36441e-42	0.568579	0.691	0.698	3.25806e-37	9.68735e-48	0.73118	0.982	0.93	3.37042e-43	2.05387e-20	1.28078e-89
Rpl21	3.14576e-43	0.31966	0.988	0.938	1.09447e-38	9.73463e-27	0.619355	0.833	0.818	3.38687e-22	4.28277e-22	0.471799	0.909	0.889	1.49006e-17	9.36615e-90	0.85908	0.995	0.976	3.25867e-85	4.28277e-22	3.74646e-89
Rpl17	1.7987e-45	0.33862	0.992	0.954	6.25804e-41	4.09087e-30	0.681655	0.868	0.848	1.4233e-25	1.28712e-43	0.640205	0.942	0.929	4.47813e-39	1.77404e-89	0.897029	0.991	0.981	6.17223e-85	4.09087e-30	7.09615e-89
Ifngr1	2.0273e-89	0.694877	0.687	0.695	7.0534e-85	4.18152e-26	0.991493	0.38	0.303	1.45483e-21	6.17397e-47	0.833729	0.63	0.608	2.14805e-42	1.28695e-27	0.812306	0.845	0.768	4.47756e-23	4.18152e-26	8.10922e-89
Snrpg	5.74501e-86	0.534495	0.703	0.638	1.9988e-81	1.23834e-25	0.544393	0.463	0.489	4.30842e-21	2.73867e-53	0.665394	0.742	0.725	9.52839e-49	2.98581e-69	0.901097	0.895	0.766	1.03882e-64	1.23834e-25	2.29801e-85
Rps7	2.79374e-53	0.395001	0.991	0.931	9.71998e-49	4.55895e-36	0.866143	0.812	0.76	1.58615e-31	3.73383e-23	0.461292	0.918	0.913	1.29907e-18	1.11677e-85	0.9245	0.991	0.979	3.88546e-81	3.73383e-23	4.46707e-85
Prdx6	1.37956e-63	0.570956	0.702	0.55	4.79976e-59	2.42102e-17	1.08408	0.244	0.128	8.42322e-13	3.90667e-22	0.673316	0.576	0.442	1.35921e-17	9.11151e-85	1.28919	0.877	0.512	3.17008e-80	2.42102e-17	3.6446e-84
Edf1	1.19013e-84	0.514007	0.723	0.661	4.1407e-80	7.99819e-15	0.36856	0.286	0.32	2.78273e-10	4.73177e-30	0.346807	0.521	0.565	1.64628e-25	4.97499e-08	0.277394	0.795	0.763	0.0017309	4.97499e-08	4.76052e-84
Rplp2	9.18483e-35	0.287839	0.991	0.953	3.19559e-30	1.15774e-28	0.531132	0.836	0.878	4.02799e-24	2.84883e-19	0.393226	0.967	0.966	9.91165e-15	2.15114e-83	0.826164	0.986	0.98	7.48423e-79	2.84883e-19	8.60455e-83
Rgs1	1.63875e-80	1.08868	0.6	0.316	5.70152e-76	7.9173e-16	1.01752	0.369	0.194	2.75459e-11	1.25307e-45	1.37635	0.606	0.253	4.35968e-41	1.15936e-26	1.24179	0.582	0.287	4.03363e-22	7.9173e-16	6.55498e-80
Uba52	2.93679e-58	0.437302	0.705	0.677	1.02177e-53	9.46789e-45	1.03461	0.662	0.544	3.29407e-40	1.18864e-27	0.421161	0.579	0.554	4.13551e-23	6.94044e-80	0.902755	0.995	0.937	2.41472e-75	1.18864e-27	2.77618e-79
Rpl38	1.0587e-29	0.262931	0.987	0.96	3.68344e-25	9.25931e-20	0.515814	0.927	0.914	3.2215e-15	1.48416e-23	0.426415	0.955	0.96	5.1637e-19	1.37106e-78	0.760456	0.991	0.991	4.77019e-74	9.25931e-20	5.48423e-78
Rpl30	2.98798e-78	0.442591	0.998	0.963	1.03958e-73	2.74934e-25	0.657627	0.578	0.6	9.5655e-21	2.42803e-44	0.65961	0.942	0.925	8.44762e-40	3.28969e-76	0.773824	1	0.988	1.14455e-71	2.74934e-25	1.19519e-77
Sumo1	5.70315e-78	0.394422	0.651	0.649	1.98424e-73	4.97558e-13	0.35823	0.286	0.304	1.7311e-08	4.7406e-33	0.472664	0.552	0.529	1.64935e-28	2.63486e-24	0.493787	0.859	0.763	9.1672e-20	4.97558e-13	2.28126e-77
Rps21	1.08157e-68	0.416326	0.994	0.975	3.76301e-64	6.40132e-30	0.574205	0.686	0.726	2.22715e-25	3.67223e-50	0.694034	0.973	0.947	1.27764e-45	7.51747e-78	0.76113	0.995	0.991	2.61548e-73	6.40132e-30	3.00699e-77
Tmem160	2.0849e-77	0.4269	0.559	0.547	7.25379e-73	1.19932e-18	0.373427	0.223	0.288	4.17267e-14	1.31705e-23	0.340459	0.4	0.419	4.58229e-19	8.60118e-12	0.442809	0.686	0.544	2.99252e-07	8.60118e-12	8.33961e-77
Sri	2.54158e-76	0.492707	0.742	0.689	8.84265e-72	1.23814e-13	0.383688	0.254	0.281	4.30775e-09	7.10767e-17	0.251038	0.473	0.505	2.4729e-12	1.39471e-08	0.37037	0.827	0.736	0.000485248	1.39471e-08	1.01663e-75
Rpl13a	1.82126e-46	0.309513	0.627	0.637	6.33651e-42	3.61376e-76	1.08734	0.962	0.9	1.2573e-71	5.8903e-72	0.864557	0.964	0.941	2.04935e-67	3.14999e-31	0.634434	0.795	0.628	1.09595e-26	3.14999e-31	1.4455e-75
Uhrf2	1.0304e-74	0.684491	0.475	0.349	3.58495e-70	8.44667e-27	1.50561	0.261	0.107	2.93877e-22	3.86918e-59	1.16694	0.567	0.373	1.34617e-54	1.10177e-09	0.346783	0.482	0.425	3.83329e-05	1.10177e-09	4.12158e-74
Serbp1	1.34663e-74	0.502098	0.851	0.79	4.68519e-70	3.77097e-15	0.277723	0.303	0.363	1.31199e-10	2.94815e-11	0.264067	0.839	0.858	1.02572e-06	1.0163e-40	0.710426	0.945	0.896	3.53592e-36	2.94815e-11	5.38652e-74
Cox6c	4.19612e-74	0.500897	0.89	0.829	1.45991e-69	4.00879e-19	0.275615	0.498	0.601	1.39474e-14	1.07148e-25	0.445397	0.782	0.786	3.72789e-21	9.4692e-23	0.453807	0.968	0.94	3.29452e-18	4.00879e-19	1.67845e-73
Arpp19	1.61679e-73	0.386419	0.607	0.599	5.62515e-69	3.14353e-24	0.753714	0.425	0.385	1.0937e-19	4.58249e-30	0.494498	0.618	0.6	1.59434e-25	2.67823e-09	0.316097	0.795	0.737	9.3181e-05	2.67823e-09	6.46718e-73
Cdkn1b	4.65678e-73	0.5557	0.541	0.461	1.62019e-68	1.81723e-13	0.888851	0.233	0.17	6.32249e-09	1.82688e-64	1.07373	0.555	0.311	6.35609e-60	3.69023e-08	0.409234	0.541	0.402	0.0012839	3.69023e-08	1.86271e-72
Cytip	6.03405e-28	0.352646	0.711	0.552	2.09937e-23	2.18775e-09	0.368654	0.324	0.333	7.61163e-05	7.52769e-73	1.33226	0.755	0.348	2.61903e-68	8.67886e-41	0.814701	0.723	0.278	3.01955e-36	2.18775e-09	3.01107e-72
Rpl22	4.14514e-27	0.25566	0.976	0.912	1.44218e-22	3.95285e-17	0.435963	0.634	0.651	1.37527e-12	1.55773e-23	0.442165	0.9	0.893	5.41966e-19	1.659e-70	0.811548	0.986	0.964	5.77199e-66	3.95285e-17	6.63599e-70
Rps24	2.70773e-44	0.344867	0.993	0.975	9.42072e-40	2.66339e-29	0.623017	0.864	0.888	9.26647e-25	4.23122e-23	0.463817	0.958	0.969	1.47213e-18	2.58295e-70	0.751208	0.995	0.99	8.98659e-66	4.23122e-23	1.03318e-69
Lsm5	2.96707e-70	0.423879	0.442	0.399	1.0323e-65	5.1595e-14	0.475904	0.226	0.228	1.79509e-09	1.0098e-35	0.509372	0.415	0.376	3.51329e-31	1.82786e-33	0.675917	0.695	0.508	6.35948e-29	5.1595e-14	1.18683e-69
Prrc2c	2.67271e-68	0.454806	0.658	0.645	9.29889e-64	1.18217e-15	0.795853	0.265	0.214	4.113e-11	6.20498e-59	0.873782	0.83	0.735	2.15884e-54	1.68966e-20	0.571819	0.805	0.705	5.87868e-16	1.18217e-15	1.06908e-67
Rpl24	4.11081e-32	0.296817	0.978	0.93	1.43023e-27	2.53578e-26	0.545614	0.78	0.798	8.82247e-22	8.80469e-07	0.250424	0.93	0.93	0.0306333	1.00448e-67	0.755572	0.991	0.981	3.49479e-63	8.80469e-07	4.01793e-67
Hnrnpl	1.78573e-66	0.34631	0.523	0.546	6.21293e-62	2.32002e-12	0.433231	0.188	0.218	8.0718e-08	3.45408e-53	0.780684	0.633	0.511	1.20174e-48	6.35824e-14	0.398281	0.709	0.636	2.21216e-09	2.32002e-12	7.14294e-66
Rps27	1.51447e-59	0.411158	0.991	0.973	5.26913e-55	2.33571e-66	0.988766	0.997	0.974	8.12639e-62	8.41497e-50	0.753991	0.933	0.92	2.92774e-45	1.13355e-53	0.665126	0.995	0.996	3.94384e-49	8.41497e-50	9.34283e-66
Rpl39	5.28282e-43	0.297921	0.994	0.949	1.838e-38	1.33506e-16	0.482057	0.861	0.866	4.64494e-12	9.37532e-29	0.543954	0.939	0.925	3.26186e-24	1.89631e-65	0.772923	0.991	0.99	6.59765e-61	1.33506e-16	7.58525e-65
Ptprc	1.51216e-38	0.354124	0.923	0.894	5.2611e-34	5.04993e-14	0.298168	0.498	0.574	1.75697e-09	2.01996e-65	0.971016	0.97	0.856	7.02785e-61	3.18071e-06	0.303897	0.886	0.843	0.110663	3.18071e-06	8.07984e-65
Rpl27	9.72178e-46	0.395339	0.932	0.859	3.3824e-41	3.4163e-36	0.693569	0.756	0.758	1.1886e-31	1.2965e-31	0.500813	0.948	0.936	4.51079e-27	3.49014e-64	0.834146	0.927	0.839	1.21429e-59	1.2965e-31	1.39606e-63
Eef1a1	2.57097e-55	0.338032	0.997	0.975	8.94491e-51	2.04722e-10	0.3833	0.909	0.9	7.1227e-06	3.22986e-14	0.292366	0.976	0.978	1.12373e-09	5.8555e-64	0.745783	0.995	0.993	2.03725e-59	2.04722e-10	2.3422e-63
Rpl27a	3.41678e-42	0.308634	0.994	0.973	1.18877e-37	8.67802e-19	0.459425	0.805	0.835	3.01926e-14	4.11441e-16	0.336398	0.964	0.96	1.43148e-11	2.61732e-63	0.693434	0.995	0.99	9.10618e-59	4.11441e-16	1.04693e-62
Rbm39	2.76021e-63	0.460074	0.925	0.874	9.60332e-59	1.9906e-31	0.736744	0.516	0.506	6.92569e-27	1.98341e-38	0.606336	0.873	0.853	6.90067e-34	2.52278e-15	0.41728	0.914	0.886	8.77724e-11	2.52278e-15	1.10408e-62
Eif3e	7.84294e-47	0.409131	0.761	0.704	2.72872e-42	1.66486e-14	0.42342	0.272	0.294	5.79237e-10	1.65024e-20	0.315829	0.621	0.663	5.74153e-16	1.4658e-62	0.909075	0.923	0.779	5.09982e-58	1.66486e-14	5.86321e-62
Rpl4	6.91935e-19	0.261302	0.902	0.844	2.40738e-14	8.22031e-34	0.702794	0.655	0.649	2.86001e-29	5.10579e-14	0.37792	0.852	0.842	1.77641e-09	1.92205e-62	0.821917	0.991	0.907	6.68718e-58	5.10579e-14	7.68818e-62
Paip2	2.18021e-60	0.388558	0.647	0.632	7.58538e-56	3.29868e-15	0.494959	0.188	0.202	1.14768e-10	1.12291e-28	0.567752	0.479	0.385	3.90682e-24	9.34779e-16	0.505997	0.764	0.675	3.25228e-11	3.29868e-15	8.72083e-60
Gabarapl2	3.3605e-58	0.438658	0.64	0.592	1.16919e-53	8.57498e-18	0.759544	0.24	0.192	2.98341e-13	8.23495e-18	0.398345	0.436	0.393	2.8651e-13	2.00026e-09	0.407789	0.786	0.653	6.95932e-05	2.00026e-09	1.3442e-57
Crem	5.4211e-43	0.411976	0.206	0.16	1.88611e-38	2.51612e-33	1.42776	0.268	0.143	8.75409e-29	6.14658e-58	1.05442	0.33	0.1	2.13852e-53	1.74051e-16	0.54803	0.341	0.251	6.05559e-12	1.74051e-16	2.45863e-57
Myl12b	5.61864e-56	0.426321	0.893	0.846	1.95484e-51	3.3187e-14	0.404406	0.265	0.308	1.15464e-09	5.1467e-33	0.604085	0.658	0.566	1.79064e-28	9.37129e-08	0.316801	0.886	0.834	0.00326046	9.37129e-08	2.24745e-55
Rps27rt	7.69668e-51	0.271598	0.556	0.6	2.67783e-46	3.02026e-53	1.04149	0.892	0.825	1.05081e-48	9.67695e-29	0.414062	0.427	0.429	3.3668e-24	9.66e-05	0.261128	0.359	0.285	1	9.66e-05	1.20811e-52
Atp5d	3.42501e-52	0.379415	0.761	0.735	1.19163e-47	5.21733e-18	0.299528	0.258	0.338	1.81521e-13	6.24527e-18	0.307446	0.597	0.592	2.17285e-13	7.86791e-29	0.516339	0.9	0.872	2.7374e-24	6.24527e-18	1.37001e-51
Rsrc2	8.73019e-52	0.312012	0.577	0.604	3.03741e-47	1.18946e-13	0.387505	0.188	0.228	4.13835e-09	2.05854e-30	0.54237	0.661	0.635	7.16207e-26	1.60898e-05	0.286217	0.686	0.6	0.559796	1.60898e-05	3.49208e-51
Hint1	6.24161e-50	0.436254	0.812	0.771	2.17158e-45	1.15348e-24	0.441939	0.401	0.467	4.01319e-20	9.08477e-24	0.282117	0.645	0.74	3.16077e-19	6.1492e-06	0.253511	0.923	0.898	0.213943	6.1492e-06	2.49664e-49
Rpl34	6.627e-40	0.29438	0.992	0.959	2.30567e-35	5.01307e-21	0.57294	0.892	0.841	1.74415e-16	3.03667e-28	0.484383	0.927	0.924	1.05652e-23	2.72775e-49	0.622809	0.991	0.988	9.49041e-45	5.01307e-21	1.0911e-48
Zc3hav1	1.11369e-48	0.399167	0.455	0.428	3.87475e-44	2.88611e-19	0.983368	0.289	0.189	1.00414e-14	5.5023e-30	0.67743	0.6	0.589	1.91436e-25	8.29499e-24	0.670902	0.645	0.448	2.88599e-19	2.88611e-19	4.45476e-48
Nktr	1.31032e-46	0.359927	0.562	0.583	4.55885e-42	6.98029e-13	0.514641	0.209	0.21	2.42858e-08	1.29524e-21	0.479545	0.621	0.612	4.5064e-17	4.77717e-06	0.410251	0.641	0.566	0.166207	4.77717e-06	5.24126e-46
Ndufb11	1.4321e-43	0.287235	0.686	0.692	4.98256e-39	1.87803e-16	0.322532	0.247	0.313	6.53403e-12	1.00364e-32	0.440366	0.527	0.543	3.49186e-28	9.80996e-15	0.378572	0.832	0.788	3.41308e-10	9.80996e-15	5.7284e-43
Tomm7	3.72017e-42	0.321219	0.765	0.751	1.29432e-37	6.62289e-15	0.27758	0.345	0.426	2.30423e-10	1.77959e-28	0.481577	0.712	0.692	6.19154e-24	6.65964e-20	0.436072	0.882	0.86	2.31702e-15	6.62289e-15	1.48807e-41
Furin	7.70755e-42	0.52176	0.594	0.497	2.68161e-37	6.91308e-14	0.411526	0.331	0.41	2.4052e-09	1.22597e-41	1.10968	0.624	0.51	4.26541e-37	1.24513e-28	0.892298	0.464	0.364	4.33206e-24	6.91308e-14	3.08302e-41
4930523C07Rik	2.60616e-20	0.261421	0.494	0.455	9.06735e-16	4.78598e-19	0.932233	0.23	0.16	1.66514e-14	2.4282e-32	0.831758	0.561	0.34	8.44819e-28	2.67404e-39	0.848504	0.536	0.161	9.30352e-35	4.78598e-19	1.06962e-38
Ctla2a	1.34466e-30	0.639738	0.402	0.231	4.67833e-26	6.23525e-37	1.75807	0.244	0.032	2.16937e-32	2.50549e-38	0.90597	0.594	0.246	8.7171e-34	4.25909e-19	1.0617	0.309	0.217	1.48182e-14	4.25909e-19	1.0022e-37
Uqcrh	1.80825e-26	0.254898	0.877	0.878	6.29126e-22	9.41183e-27	0.592502	0.554	0.583	3.27456e-22	4.48381e-36	0.605139	0.858	0.799	1.56001e-31	1.04894e-27	0.536391	0.95	0.911	3.64949e-23	1.80825e-26	1.79352e-35
Sptssa	1.93833e-35	0.331351	0.653	0.611	6.74384e-31	2.04743e-17	0.457837	0.174	0.222	7.12342e-13	7.74418e-25	0.582123	0.452	0.374	2.69436e-20	2.55468e-13	0.481707	0.782	0.704	8.88823e-09	2.55468e-13	7.75332e-35

## Sheet: C5
	Exp_1_(S005)_p_val	S005_avg_log2FC	S005_pct.1	S005_pct.2	S005_p_val_adj	Exp_2_(SP024)_p_val	SP024_avg_log2FC	SP024_pct.1	SP024_pct.2	SP024_p_val_adj	Exp_3_(LPS)_p_val	LPS_avg_log2FC	LPS_pct.1	LPS_pct.2	LPS_p_val_adj	Exp_4_(S006)_p_val	S006_avg_log2FC	S006_pct.1	S006_pct.2	S006_p_val_adj	max_pval	minimump_p_val
Hexb	0	3.18806	0.994	0.42	0	0	3.12102	0.88	0.165	0	0	2.94347	0.978	0.319	0	1.30382e-222	1.33721	0.907	0.588	4.53626e-218	1.30382e-222	0
Pmepa1	5.12462e-217	2.89545	0.953	0.226	1.78296e-212	1.08417e-269	2.62036	0.68	0.042	3.77203e-265	2.23203e-274	1.75291	0.836	0.157	7.76566e-270	0	1.68814	0.804	0.242	0	5.12462e-217	0
Ms4a7	4.5015e-180	3.03148	0.965	0.195	1.56616e-175	0	3.20315	0.852	0.08	0	0	2.35602	0.921	0.206	0	2.32786e-270	1.36457	0.988	0.699	8.0991e-266	4.5015e-180	0
Ctss	2.83335e-167	2.41243	0.994	0.676	9.85779e-163	3.17081e-265	1.75835	0.98	0.765	1.10319e-260	0	1.99917	0.996	0.816	0	3.92462e-215	1.04378	0.998	0.826	1.36545e-210	2.83335e-167	0
Cx3cr1	4.10431e-149	2.47983	0.971	0.193	1.42797e-144	6.20472e-152	1.94762	0.627	0.098	2.15875e-147	0	2.81208	0.899	0.095	0	2.04451e-268	1.30857	0.988	0.648	7.11327e-264	4.10431e-149	0
Axl	1.59547e-134	1.8496	0.901	0.142	5.55097e-130	1.06258e-130	1.72033	0.54	0.081	3.69692e-126	0	2.06327	0.97	0.383	0	3.7974e-127	0.683567	0.465	0.137	1.32119e-122	3.7974e-127	0
Lilra5	3.96815e-133	1.60757	0.733	0.036	1.3806e-128	5.72974e-127	1.39093	0.309	0.011	1.99349e-122	0	1.28325	0.655	0.021	0	1.17995e-33	0.305248	0.25	0.108	4.10529e-29	1.17995e-33	0
Tgfbr1	1.05398e-129	1.91735	0.913	0.228	3.667e-125	3.71956e-170	2.01836	0.597	0.071	1.29411e-165	0	1.95591	0.879	0.216	0	4.18054e-190	0.964877	0.757	0.337	1.45449e-185	1.05398e-129	0
Zmynd15	1.22389e-128	2.00772	0.779	0.059	4.25816e-124	3.34155e-214	2.15767	0.495	0.017	1.16259e-209	0	2.51142	0.915	0.114	0	1.11812e-71	0.466664	0.253	0.056	3.89015e-67	1.11812e-71	0
Cxcl16	8.90035e-122	2.09049	0.965	0.305	3.09661e-117	8.72523e-180	2.02409	0.765	0.17	3.03568e-175	4.93333e-228	1.51018	0.972	0.564	1.7164e-223	0	1.50913	0.917	0.435	0	8.90035e-122	0
Mpeg1	2.49544e-98	1.84247	0.977	0.348	8.68213e-94	1.80101e-85	1.38812	0.708	0.295	6.26606e-81	0	2.2569	0.996	0.552	0	6.83444e-107	0.785145	0.747	0.368	2.37784e-102	1.80101e-85	0
Apoe	6.88196e-93	2.72522	0.988	0.494	2.39437e-88	0	3.15266	0.996	0.62	0	1.16819e-283	2.83143	0.996	0.659	4.06437e-279	9.40897e-84	0.777302	1	0.951	3.27357e-79	9.40897e-84	0
Cd72	1.94934e-68	1.48837	0.86	0.248	6.78213e-64	4.78184e-159	2.0296	0.525	0.051	1.6637e-154	0	3.09011	0.984	0.21	0	3.27763e-173	1.0285	0.555	0.155	1.14035e-168	1.94934e-68	0
Itgb5	6.90786e-153	2.03289	0.895	0.147	2.40338e-148	1.29084e-184	1.88702	0.521	0.034	4.49108e-180	0	1.65929	0.778	0.094	4.15904e-307	1.06444e-229	1.04691	0.829	0.388	3.7034e-225	6.90786e-153	0
Tmem119	2.33319e-160	1.7523	0.767	0.024	8.11763e-156	7.10782e-140	1.50702	0.303	0.006	2.47295e-135	0	1.72333	0.693	0.044	2.27067e-306	4.17014e-190	0.869506	0.542	0.147	1.45088e-185	7.10782e-140	0
Olfml3	1.61376e-133	1.56324	0.738	0.034	5.61459e-129	6.97833e-91	1.21544	0.248	0.012	2.4279e-86	1.80233e-200	0.976001	0.485	0.028	6.27067e-196	4.00079e-287	1.28536	0.619	0.118	1.39195e-282	6.97833e-91	1.60031e-286
Cadm1	1.04483e-141	1.60055	0.762	0.034	3.63516e-137	6.91699e-189	1.77269	0.425	0.012	2.40656e-184	3.60839e-271	1.28432	0.63	0.035	1.25543e-266	2.89004e-86	0.560049	0.447	0.16	1.0055e-81	2.89004e-86	1.44336e-270
Lair1	5.75006e-85	1.44566	0.924	0.251	2.00056e-80	2.15771e-89	1.33627	0.468	0.09	7.5071e-85	1.64265e-255	1.67904	0.881	0.262	5.7151e-251	1.13171e-140	0.804803	0.72	0.308	3.93745e-136	5.75006e-85	6.57059e-255
C3ar1	2.00195e-57	0.832166	0.872	0.287	6.9652e-53	4.39238e-39	0.833446	0.383	0.13	1.5282e-34	1.5896e-241	1.69946	0.958	0.408	5.53052e-237	5.73296e-149	0.821513	0.976	0.684	1.99461e-144	4.39238e-39	6.35838e-241
Gatm	6.03568e-93	1.63842	0.895	0.212	2.09993e-88	1.48021e-117	1.47631	0.573	0.107	5.14996e-113	1.88517e-221	1.58928	0.844	0.205	6.55888e-217	7.73131e-53	0.591323	0.848	0.615	2.68988e-48	7.73131e-53	7.54068e-221
C1qa	2.68639e-83	1.90857	1	0.431	9.34648e-79	2.8705e-207	1.95706	0.972	0.448	9.98705e-203	1.26257e-161	1.39723	1	0.688	4.39275e-157	1.51778e-119	0.763467	0.993	0.795	5.28067e-115	2.68639e-83	1.1482e-206
F11r	1.22677e-83	1.3921	0.82	0.164	4.26818e-79	1.01348e-98	1.4138	0.375	0.041	3.52609e-94	5.42749e-202	1.28522	0.867	0.219	1.88833e-197	2.57192e-131	0.701072	0.486	0.127	8.94822e-127	1.22677e-83	2.171e-201
Ctsc	2.2546e-48	1.02025	0.994	0.635	7.84419e-44	1.09373e-49	0.849096	0.826	0.506	3.8053e-45	1.04667e-201	1.36989	0.984	0.706	3.64157e-197	4.32995e-51	0.309465	0.999	0.89	1.50648e-46	2.2546e-48	4.18668e-201
Anxa5	7.20992e-20	0.601326	0.959	0.732	2.50847e-15	1.38815e-13	0.277244	0.693	0.518	4.82966e-09	6.56727e-198	1.28416	0.962	0.679	2.28488e-193	9.07911e-56	0.502472	0.964	0.869	3.1588e-51	1.38815e-13	2.62691e-197
Bcl2a1b	1.85607e-98	2.07668	0.924	0.345	6.45765e-94	2.83375e-126	1.82871	0.813	0.352	9.85918e-122	9.34988e-158	1.40458	0.956	0.545	3.25301e-153	4.08955e-188	1.39045	0.787	0.34	1.42284e-183	1.85607e-98	1.63582e-187
Rgs1	1.76557e-64	2.2084	0.814	0.351	6.14277e-60	3.7447e-147	2.38606	0.669	0.172	1.30286e-142	1.47879e-187	2.56771	0.741	0.236	5.14502e-183	1.28932e-77	1.0096	0.582	0.274	4.48582e-73	1.76557e-64	5.91517e-187
Rgs10	1.07582e-49	1.06921	0.959	0.637	3.74299e-45	1.8966e-56	1.11129	0.584	0.234	6.59864e-52	1.59954e-186	1.22564	0.851	0.33	5.56513e-182	3.62983e-61	0.411253	0.988	0.843	1.26289e-56	1.07582e-49	6.39818e-186
Hpgds	2.90497e-49	0.717186	0.756	0.225	1.0107e-44	5.86043e-105	1.29804	0.333	0.025	2.03896e-100	1.42014e-183	0.753461	0.671	0.117	4.94097e-179	4.06567e-50	0.480047	0.863	0.657	1.41453e-45	2.90497e-49	5.68058e-183
C1qc	1.67819e-73	1.66108	0.983	0.399	5.83874e-69	9.43749e-181	1.72626	0.961	0.399	3.28349e-176	2.15386e-154	1.28355	0.994	0.65	7.4937e-150	3.27147e-101	0.581789	0.994	0.778	1.13821e-96	1.67819e-73	3.775e-180
Ppfia4	5.92045e-77	1.24643	0.831	0.208	2.05984e-72	1.71423e-65	1.13894	0.307	0.045	5.96415e-61	5.48249e-180	1.14584	0.657	0.126	1.90747e-175	1.29563e-47	0.391906	0.345	0.15	4.50777e-43	1.29563e-47	2.193e-179
Abhd12	4.41439e-26	0.605765	0.744	0.338	1.53586e-21	3.99373e-26	0.543492	0.281	0.101	1.3895e-21	1.64991e-178	1.17935	0.788	0.278	5.74038e-174	8.66516e-48	0.452314	0.867	0.687	3.01478e-43	4.41439e-26	6.59966e-178
Ly86	7.74295e-89	1.57691	0.977	0.507	2.69393e-84	4.33988e-50	1.00461	0.654	0.323	1.50993e-45	3.61212e-168	1.24283	0.968	0.602	1.25673e-163	2.09486e-125	0.807143	0.944	0.719	7.28844e-121	4.33988e-50	1.44485e-167
Skil	1.32294e-36	1.02266	0.866	0.468	4.60278e-32	1.08534e-29	0.782873	0.575	0.309	3.77612e-25	2.65787e-166	1.37783	0.943	0.547	9.24725e-162	1.09601e-123	0.797559	0.765	0.422	3.81325e-119	1.08534e-29	1.06315e-165
Cd83	1.47707e-35	1.43881	0.872	0.47	5.13904e-31	4.00581e-23	0.73895	0.662	0.488	1.3937e-18	2.81583e-85	1.40993	0.727	0.347	9.79684e-81	4.99726e-164	1.24016	0.919	0.642	1.73865e-159	4.00581e-23	1.99891e-163
Fyb	3.61987e-61	1.34006	0.895	0.501	1.25943e-56	4.19707e-46	0.830074	0.399	0.125	1.46024e-41	1.01554e-163	1.2189	0.984	0.718	3.53326e-159	9.23212e-35	0.38252	0.887	0.741	3.21204e-30	9.23212e-35	4.06215e-163
Col14a1	2.30295e-105	1.00004	0.576	0.021	8.01241e-101	7.62914e-87	1.12539	0.231	0.01	2.65433e-82	1.49883e-163	0.755087	0.42	0.024	5.21475e-159	2.44699e-131	0.729289	0.405	0.092	8.51356e-127	7.62914e-87	5.99534e-163
Cst3	8.02624e-48	1.15675	0.994	0.874	2.79249e-43	2.16606e-162	1.28678	0.991	0.885	7.53614e-158	4.71318e-71	0.557801	0.984	0.881	1.63981e-66	2.8978e-52	0.317376	0.999	0.971	1.0082e-47	8.02624e-48	8.66423e-162
Glipr1	3.61779e-19	0.675804	0.709	0.372	1.2587e-14	4.42251e-67	1.36015	0.429	0.105	1.53868e-62	2.49908e-162	1.20824	0.76	0.229	8.69479e-158	1.05605e-23	0.296956	0.499	0.322	3.6742e-19	3.61779e-19	9.99631e-162
C1qb	5.55356e-83	1.96015	0.994	0.434	1.93219e-78	4.18238e-162	1.64633	0.965	0.496	1.45514e-157	9.30766e-142	1.28408	0.994	0.721	3.23832e-137	1.31226e-118	0.727084	0.998	0.813	4.56563e-114	5.55356e-83	1.67295e-161
Tlr2	2.72266e-29	0.852271	0.686	0.267	9.47268e-25	1.24615e-43	1.03606	0.423	0.142	4.33561e-39	4.44129e-162	1.45481	0.943	0.534	1.54521e-157	2.26222e-39	0.481297	0.631	0.444	7.87073e-35	2.72266e-29	1.77652e-161
Zfhx3	6.09789e-38	0.8955	0.826	0.343	2.12158e-33	6.1408e-42	0.978305	0.392	0.126	2.13651e-37	9.06682e-162	1.29004	0.808	0.252	3.15453e-157	1.72694e-36	0.424832	0.711	0.516	6.00836e-32	1.72694e-36	3.62673e-161
Tmcc3	1.67605e-48	0.906235	0.645	0.144	5.83133e-44	3.18994e-27	0.778174	0.209	0.053	1.10984e-22	1.14531e-160	1.10987	0.828	0.253	3.98475e-156	2.1748e-24	0.256667	0.244	0.123	7.56655e-20	2.1748e-24	4.58123e-160
Stap1	1.67699e-08	0.468614	0.663	0.434	0.000583459	7.33041e-22	0.408551	0.246	0.097	2.5504e-17	1.98667e-159	1.38637	0.727	0.21	6.91201e-155	7.97175e-28	0.381411	0.438	0.265	2.77353e-23	1.67699e-08	7.94666e-159
Trem2	4.905e-37	1.16713	0.605	0.172	1.70655e-32	3.06659e-53	1.10796	0.336	0.073	1.06693e-48	9.45221e-47	0.605978	0.343	0.1	3.28861e-42	3.52825e-159	0.993085	0.925	0.612	1.22755e-154	4.905e-37	1.4113e-158
Aif1	3.60476e-116	1.90849	0.971	0.355	1.25417e-111	7.15704e-141	1.78992	0.773	0.257	2.49008e-136	2.66113e-148	1.27719	0.919	0.466	9.25859e-144	1.71393e-152	0.857854	0.969	0.714	5.96312e-148	3.60476e-116	6.85574e-152
Ccl4	1.05184e-103	3.35971	0.855	0.174	3.65957e-99	2.79088e-143	2.81101	0.736	0.297	9.71002e-139	1.75297e-151	2.51693	0.846	0.478	6.09895e-147	1.05204e-65	0.886934	0.529	0.269	3.66027e-61	1.05204e-65	7.0119e-151
Lgmn	4.81389e-62	1.33717	0.977	0.467	1.67485e-57	5.39893e-108	1.44632	0.808	0.32	1.8784e-103	5.25344e-150	1.21634	0.986	0.62	1.82778e-145	5.12859e-110	0.612899	0.999	0.801	1.78434e-105	4.81389e-62	2.10138e-149
Ctsh	2.22867e-57	1.22483	0.971	0.568	7.754e-53	1.78379e-32	0.73784	0.699	0.427	6.20617e-28	9.26104e-149	1.14186	0.933	0.539	3.2221e-144	7.5486e-119	0.790033	0.958	0.732	2.62631e-114	1.78379e-32	3.70442e-148
Scimp	9.09493e-95	1.61485	0.872	0.178	3.16431e-90	1.98375e-97	1.58129	0.379	0.048	6.90188e-93	4.57499e-147	1.03	0.699	0.177	1.59173e-142	7.38222e-80	0.528179	0.318	0.087	2.56842e-75	7.38222e-80	1.83e-146
Bcl2a1a	5.90783e-59	1.30287	0.651	0.118	2.05545e-54	2.45098e-71	1.51064	0.51	0.159	8.52746e-67	2.05534e-142	1.24265	0.846	0.322	7.15095e-138	4.48929e-22	0.269619	0.214	0.094	1.56191e-17	4.48929e-22	8.22137e-142
Unc93b1	1.97727e-44	1.03514	0.953	0.545	6.87933e-40	2.14286e-23	0.645935	0.582	0.343	7.45544e-19	2.52531e-140	1.03031	0.968	0.669	8.78607e-136	1.64368e-48	0.337251	0.963	0.79	5.71868e-44	2.14286e-23	1.01013e-139
Il1a	2.32479e-136	2.29123	0.634	0.017	8.08842e-132	5.8978e-115	1.91568	0.381	0.034	2.05196e-110	8.97308e-61	0.82716	0.36	0.084	3.12192e-56	7.24005e-99	1.03165	0.279	0.056	2.51896e-94	8.97308e-61	9.29917e-136
St3gal6	4.68082e-36	0.857378	0.709	0.242	1.62855e-31	1.25102e-70	0.951977	0.261	0.03	4.35254e-66	1.6202e-135	0.833751	0.55	0.089	5.63701e-131	1.33496e-19	0.280512	0.425	0.281	4.64461e-15	1.33496e-19	6.48081e-135
Tmem176b	1.30186e-33	0.902693	0.953	0.65	4.52943e-29	3.13783e-17	0.403985	0.708	0.502	1.09171e-12	4.45844e-84	0.843438	0.986	0.762	1.55118e-79	2.94408e-135	0.999222	0.897	0.607	1.0243e-130	3.13783e-17	1.17763e-134
Blnk	9.13993e-42	0.72584	0.709	0.212	3.17997e-37	4.67689e-16	0.526504	0.22	0.087	1.62718e-11	1.00921e-133	0.957472	0.675	0.178	3.51124e-129	7.62544e-40	0.312909	0.352	0.154	2.65304e-35	4.67689e-16	4.03683e-133
Ccl3	1.11853e-84	2.8578	0.709	0.142	3.89159e-80	2.34642e-133	2.69117	0.56	0.114	8.16367e-129	7.14514e-114	1.87454	0.832	0.455	2.48594e-109	3.2059e-32	0.368834	0.466	0.279	1.1154e-27	3.2059e-32	9.38569e-133
Lst1	7.54958e-44	0.843988	0.884	0.368	2.62665e-39	2.51286e-66	0.701732	0.654	0.261	8.74275e-62	1.86475e-126	1.14132	0.857	0.369	6.48784e-122	1.31469e-32	0.275511	0.98	0.886	4.57407e-28	1.31469e-32	7.45901e-126
Apobec1	1.13906e-58	1.1574	0.82	0.246	3.96302e-54	4.15171e-32	0.703747	0.288	0.089	1.44446e-27	7.28313e-119	0.984907	0.834	0.375	2.53395e-114	7.47504e-91	0.661536	0.584	0.272	2.60072e-86	4.15171e-32	2.91325e-118
Epb41l2	6.82267e-51	1.05681	0.826	0.297	2.37374e-46	6.46094e-43	0.902109	0.329	0.088	2.24789e-38	7.70174e-119	0.935553	0.855	0.39	2.67959e-114	5.655e-76	0.580105	0.691	0.452	1.96749e-71	6.46094e-43	3.0807e-118
Cd14	1.02839e-60	1.64609	0.948	0.408	3.57799e-56	2.46519e-10	0.354076	0.739	0.586	8.57687e-06	2.81823e-44	0.71371	0.901	0.631	9.8052e-40	2.58716e-117	1.22724	0.868	0.631	9.00126e-113	2.46519e-10	1.03487e-116
Slamf9	2.88299e-82	1.5944	0.895	0.297	1.00305e-77	4.96107e-51	1.07558	0.525	0.2	1.72606e-46	6.63636e-85	0.816221	0.873	0.465	2.30892e-80	4.10848e-112	0.804957	0.547	0.222	1.42942e-107	4.96107e-51	1.64339e-111
Ctsz	2.64152e-94	1.57837	0.965	0.634	9.19037e-90	2.09671e-56	1.02253	0.78	0.462	7.29487e-52	2.3745e-108	0.878978	0.988	0.82	8.26136e-104	2.89605e-68	0.516781	0.988	0.864	1.00759e-63	2.09671e-56	9.498e-108
Adgre1	1.30303e-46	1.04161	0.895	0.379	4.53351e-42	2.08418e-30	0.734653	0.458	0.205	7.25128e-26	2.25774e-67	0.564928	0.927	0.58	7.85511e-63	2.61281e-108	0.681401	0.97	0.734	9.0905e-104	2.08418e-30	1.04513e-107
Sat1	1.28492e-26	0.736222	0.971	0.797	4.47049e-22	1.80548e-18	0.347492	0.817	0.624	6.28163e-14	9.97549e-107	0.976893	0.966	0.767	3.47067e-102	4.72265e-26	0.259596	0.976	0.9	1.6431e-21	1.80548e-18	3.99019e-106
Dst	7.87317e-27	0.454756	0.616	0.233	2.73923e-22	1.23654e-39	0.859256	0.207	0.034	4.30217e-35	1.77378e-106	0.90313	0.899	0.445	6.17133e-102	4.83073e-27	0.280954	0.319	0.172	1.68071e-22	7.87317e-27	7.09512e-106
AU020206	1.16562e-43	0.585319	0.756	0.252	4.05543e-39	1.24464e-77	0.982334	0.298	0.034	4.33036e-73	2.24042e-105	0.778552	0.63	0.173	7.79486e-101	6.52008e-30	0.274323	0.254	0.114	2.26847e-25	6.52008e-30	8.96167e-105
Ntpcr	2.46973e-95	1.52254	0.837	0.197	8.5927e-91	2.24748e-84	1.22213	0.322	0.034	7.81944e-80	1.38453e-84	0.743702	0.432	0.116	4.81707e-80	3.54106e-105	0.715748	0.828	0.552	1.232e-100	2.24748e-84	1.41642e-104
Tmem176a	4.488e-30	0.735729	0.959	0.604	1.56146e-25	2.39873e-20	0.524517	0.636	0.409	8.34564e-16	1.06933e-104	1.02946	0.966	0.717	3.72041e-100	1.07006e-81	0.779119	0.732	0.466	3.72294e-77	2.39873e-20	4.27732e-104
Irf8	3.72663e-56	0.943207	0.942	0.383	1.29657e-51	1.41226e-63	1.01023	0.377	0.083	4.91353e-59	1.68706e-101	0.823522	0.826	0.355	5.86962e-97	1.11721e-54	0.486423	0.737	0.486	3.88698e-50	1.11721e-54	6.74824e-101
Mbnl2	1.44104e-19	0.584133	0.791	0.448	5.01367e-15	9.24256e-14	0.42286	0.279	0.14	3.21567e-09	1.38766e-100	0.873615	0.909	0.531	4.82795e-96	5.58737e-17	0.267387	0.644	0.513	1.94396e-12	9.24256e-14	5.55064e-100
Lpcat2	5.50619e-46	0.946762	0.779	0.253	1.91571e-41	4.65403e-53	0.918253	0.303	0.062	1.61923e-48	1.42851e-33	0.333413	0.584	0.312	4.97006e-29	3.9457e-97	0.684101	0.77	0.448	1.37279e-92	1.42851e-33	1.57828e-96
Csf1r	8.92305e-48	0.945108	0.977	0.493	3.10451e-43	1.96421e-58	0.979191	0.736	0.368	6.83388e-54	1.18521e-77	0.794594	0.941	0.628	4.12359e-73	3.5152e-92	0.531582	0.998	0.801	1.22301e-87	8.92305e-48	1.40608e-91
Nfe2l2	1.92944e-66	1.44842	0.936	0.476	6.71291e-62	1.94112e-20	0.536189	0.512	0.293	6.75355e-16	1.33976e-91	0.967457	0.913	0.581	4.6613e-87	1.04022e-49	0.523942	0.868	0.736	3.61912e-45	1.94112e-20	5.35905e-91
Lgals3bp	5.82385e-16	0.575455	0.663	0.346	2.02623e-11	1.68418e-21	0.634411	0.237	0.082	5.85959e-17	3.72835e-90	0.812829	0.97	0.761	1.29717e-85	2.08376e-12	0.250121	0.553	0.447	7.24983e-08	2.08376e-12	1.49134e-89
Gngt2	4.52226e-56	1.11207	0.808	0.231	1.57339e-51	4.91076e-81	0.638178	0.547	0.167	1.70855e-76	4.69509e-90	0.549079	0.618	0.198	1.63351e-85	8.83771e-90	0.367286	0.573	0.23	3.07482e-85	4.52226e-56	1.87803e-89
Gpr65	4.99246e-53	1.26464	0.767	0.228	1.73698e-48	1.00296e-51	1.06739	0.346	0.081	3.4895e-47	2.65593e-88	0.748284	0.711	0.269	9.24051e-84	1.41046e-80	0.649385	0.716	0.413	4.90728e-76	1.00296e-51	1.06237e-87
Tgif1	1.19773e-27	0.780738	0.709	0.301	4.16714e-23	4.38844e-13	0.3731	0.342	0.194	1.52683e-08	3.30086e-62	0.806783	0.709	0.344	1.14844e-57	1.01479e-87	0.682343	0.74	0.48	3.53064e-83	4.38844e-13	4.05914e-87
Bcl2a1d	5.39613e-21	0.731255	0.494	0.171	1.87742e-16	1.09954e-26	0.873643	0.536	0.302	3.82551e-22	2.97637e-81	0.90462	0.719	0.307	1.03554e-76	2.02122e-52	0.455013	0.379	0.148	7.03224e-48	5.39613e-21	1.19055e-80
Rtcb	8.74155e-71	1.23316	0.89	0.341	3.04136e-66	1.69376e-73	1.24868	0.388	0.071	5.89293e-69	4.23063e-81	0.76156	0.701	0.332	1.47192e-76	2.52962e-43	0.40919	0.611	0.423	8.80105e-39	2.52962e-43	1.69225e-80
Slc15a3	9.11476e-33	0.73275	0.715	0.265	3.17121e-28	1.91395e-32	0.804058	0.462	0.202	6.65903e-28	4.42528e-37	0.493058	0.844	0.579	1.53964e-32	5.30579e-78	0.600553	0.643	0.338	1.84599e-73	1.91395e-32	2.12232e-77
Slc29a3	2.27014e-55	1.07703	0.773	0.242	7.89827e-51	2.83528e-28	0.596996	0.227	0.061	9.8645e-24	7.70576e-78	0.775839	0.665	0.286	2.68099e-73	4.36352e-33	0.3466	0.417	0.258	1.51816e-28	2.83528e-28	3.08231e-77
Smim14	4.60401e-12	0.292351	0.837	0.578	1.60183e-07	5.98381e-27	0.583538	0.475	0.233	2.08189e-22	3.22795e-77	0.598862	0.657	0.246	1.12307e-72	3.98963e-26	0.321482	0.701	0.542	1.38807e-21	4.60401e-12	1.29118e-76
Cybb	1.33506e-57	1.24478	0.988	0.529	4.64495e-53	1.02611e-58	0.980997	0.778	0.416	3.57005e-54	2.28863e-74	0.724827	0.994	0.778	7.96259e-70	3.89696e-69	0.526744	0.862	0.597	1.35583e-64	1.33506e-57	9.15451e-74
Bst2	3.13835e-45	1.09003	0.948	0.532	1.09189e-40	6.58656e-74	1.31428	0.651	0.249	2.2916e-69	3.18338e-60	0.617184	0.978	0.894	1.10756e-55	9.48491e-20	0.352915	0.839	0.722	3.29999e-15	9.48491e-20	2.63463e-73
Lacc1	3.56507e-54	0.978476	0.762	0.201	1.24036e-49	6.28645e-29	0.792966	0.242	0.066	2.18718e-24	3.45584e-73	0.878138	0.846	0.486	1.20235e-68	1.20811e-52	0.493126	0.635	0.414	4.20324e-48	6.28645e-29	1.38233e-72
Fcgr1	3.2967e-69	1.18074	0.744	0.137	1.14699e-64	1.22393e-32	0.660482	0.205	0.045	4.2583e-28	8.09087e-73	0.826999	0.903	0.559	2.81498e-68	2.28293e-56	0.518692	0.814	0.58	7.94277e-52	1.22393e-32	3.23635e-72
Ctsb	1.64921e-34	0.929443	0.988	0.725	5.73792e-30	1.64394e-72	1.09209	0.891	0.541	5.71961e-68	2.13249e-56	0.658428	0.992	0.883	7.41936e-52	1.59267e-49	0.273972	1	0.89	5.54123e-45	1.64921e-34	6.57577e-72
Plau	1.91298e-32	0.865776	0.343	0.052	6.65565e-28	9.54578e-72	2.23113	0.362	0.074	3.32117e-67	4.85731e-56	0.601932	0.295	0.062	1.68996e-51	3.07439e-16	0.262613	0.336	0.249	1.06964e-11	3.07439e-16	3.81831e-71
Rasgef1b	3.19275e-12	0.527957	0.459	0.209	1.11082e-07	9.10214e-17	0.664379	0.214	0.08	3.16682e-12	1.29844e-56	0.734267	0.442	0.138	4.51752e-52	3.22888e-71	0.646442	0.555	0.323	1.12339e-66	3.19275e-12	1.29155e-70
Hck	2.7021e-42	0.838987	0.791	0.28	9.40116e-38	7.00052e-25	0.561948	0.214	0.064	2.43562e-20	1.84458e-68	0.67954	0.919	0.605	6.41767e-64	3.45448e-23	0.298047	0.66	0.493	1.20188e-18	3.45448e-23	7.37833e-68
Atf3	1.24543e-45	1.80335	0.849	0.458	4.3331e-41	4.85448e-08	0.379918	0.475	0.34	0.00168897	3.51106e-68	1.22212	0.705	0.379	1.22157e-63	1.17854e-57	0.739131	0.87	0.659	4.10038e-53	4.85448e-08	1.40442e-67
Rpl10	3.2145e-19	0.517244	0.971	0.913	1.11839e-14	8.08301e-14	0.313508	0.928	0.825	2.81224e-09	7.58988e-68	0.696367	0.956	0.834	2.64067e-63	3.16839e-48	0.302961	1	0.971	1.10235e-43	8.08301e-14	3.03595e-67
Laptm5	4.1266e-14	0.430266	0.988	0.943	1.43573e-09	5.43729e-21	0.444637	0.821	0.611	1.89174e-16	1.92739e-34	0.380065	0.99	0.873	6.70577e-30	1.12692e-67	0.434303	0.998	0.943	3.92079e-63	4.1266e-14	4.50769e-67
Pld4	2.88841e-47	0.95213	0.936	0.414	1.00493e-42	5.90373e-15	0.292963	0.503	0.327	2.05402e-10	6.98077e-66	0.785302	0.673	0.312	2.42875e-61	5.14759e-27	0.296806	0.878	0.723	1.79095e-22	5.90373e-15	2.79231e-65
Cd68	2.01139e-64	1.32884	0.953	0.416	6.99804e-60	1.4338e-24	0.614473	0.458	0.229	4.98848e-20	6.59939e-24	0.402943	0.677	0.444	2.29606e-19	2.39055e-47	0.263015	0.966	0.785	8.31721e-43	6.59939e-24	8.04557e-64
Rps29	7.0188e-15	0.414271	1	0.985	2.44198e-10	1.72907e-20	0.298339	0.998	0.981	6.0158e-16	3.72527e-62	0.553067	0.988	0.977	1.29609e-57	1.01872e-60	0.327669	1	0.998	3.54434e-56	7.0188e-15	1.49011e-61
Mef2c	3.53644e-32	0.576661	0.86	0.415	1.2304e-27	2.23472e-23	0.558687	0.375	0.174	7.77503e-19	5.35747e-62	0.635275	0.6	0.243	1.86397e-57	1.85288e-41	0.355277	0.946	0.773	6.44655e-37	2.23472e-23	2.14299e-61
Il10ra	4.05558e-29	0.662774	0.779	0.348	1.41102e-24	4.11732e-16	0.441258	0.222	0.093	1.4325e-11	1.21275e-61	0.695486	0.762	0.41	4.21939e-57	1.75115e-21	0.269998	0.549	0.381	6.09259e-17	4.11732e-16	4.85099e-61
Svbp	5.60412e-16	0.440635	0.622	0.307	1.94979e-11	5.71147e-35	0.735157	0.246	0.059	1.98714e-30	3.09454e-61	0.630155	0.602	0.259	1.07665e-56	3.78974e-38	0.347892	0.547	0.326	1.31853e-33	5.60412e-16	1.23782e-60
Creb5	1.47713e-32	0.882329	0.663	0.223	5.13922e-28	2.47048e-35	0.952838	0.362	0.123	8.59529e-31	6.83486e-60	0.693863	0.612	0.258	2.37798e-55	1.91929e-50	0.518194	0.519	0.281	6.67759e-46	1.47713e-32	2.73394e-59
Elmo1	4.72496e-12	0.435586	0.68	0.404	1.64391e-07	8.40368e-23	0.501852	0.224	0.076	2.92381e-18	1.07693e-59	0.623641	0.741	0.379	3.74686e-55	7.81328e-23	0.335264	0.696	0.549	2.7184e-18	4.72496e-12	4.30773e-59
Gusb	1.18683e-19	0.680269	0.75	0.406	4.12921e-15	5.0014e-27	0.685819	0.373	0.154	1.74009e-22	1.14325e-59	0.696587	0.723	0.401	3.97759e-55	2.72555e-44	0.40585	0.899	0.724	9.48273e-40	1.18683e-19	4.573e-59
Npc2	1.05497e-58	1.11229	0.977	0.796	3.67046e-54	3.18603e-41	0.77321	0.828	0.603	1.10848e-36	1.71403e-49	0.457336	0.99	0.837	5.96346e-45	6.09882e-32	0.255439	0.993	0.928	2.1219e-27	6.09882e-32	4.21989e-58
Cxcl2	6.0585e-26	1.23017	0.663	0.279	2.10787e-21	6.38973e-23	0.807536	0.749	0.555	2.22312e-18	9.3453e-08	0.405339	0.737	0.668	0.00325142	3.7754e-58	0.852511	0.831	0.637	1.31354e-53	9.3453e-08	1.51016e-57
Ptms	3.51608e-17	0.420528	0.924	0.641	1.22332e-12	4.15036e-13	0.361389	0.519	0.346	1.44399e-08	2.35413e-55	0.468186	0.879	0.545	8.19049e-51	1.29674e-42	0.400067	0.933	0.795	4.5116e-38	4.15036e-13	9.41652e-55
Runx3	6.64089e-21	0.392951	0.75	0.397	2.3105e-16	4.3115e-20	0.607806	0.24	0.088	1.50006e-15	5.10607e-54	0.664877	0.749	0.4	1.7765e-49	2.72314e-23	0.272126	0.342	0.185	9.47434e-19	4.3115e-20	2.04243e-53
Tpd52	8.49446e-29	0.625709	0.866	0.455	2.95539e-24	1.41024e-19	0.26364	0.416	0.233	4.90651e-15	2.71721e-53	0.571094	0.814	0.492	9.4537e-49	4.02873e-36	0.311014	0.888	0.726	1.40167e-31	1.41024e-19	1.08688e-52
Anxa3	1.07961e-43	0.992059	0.756	0.245	3.75617e-39	5.31812e-24	0.613084	0.255	0.088	1.85028e-19	3.4631e-53	0.626056	0.608	0.272	1.20488e-48	5.77169e-42	0.405465	0.843	0.642	2.00809e-37	5.31812e-24	1.38524e-52
Ctsa	7.92381e-26	0.704431	0.907	0.55	2.75685e-21	9.82105e-31	0.595649	0.512	0.252	3.41694e-26	9.81618e-52	0.60354	0.846	0.546	3.41525e-47	2.68987e-35	0.309049	0.949	0.813	9.35859e-31	7.92381e-26	3.92647e-51
Rab20	1.27627e-47	0.918545	0.593	0.116	4.4404e-43	3.44984e-39	0.791796	0.307	0.085	1.20027e-34	2.54535e-50	0.604082	0.61	0.279	8.85579e-46	1.51581e-48	0.50217	0.455	0.248	5.2738e-44	3.44984e-39	1.01814e-49
Il1b	2.70968e-49	1.54539	0.733	0.207	9.42752e-45	3.01087e-13	0.390719	0.693	0.527	1.04754e-08	9.51541e-42	0.492484	0.683	0.373	3.3106e-37	2.51889e-40	0.422227	0.506	0.281	8.76371e-36	3.01087e-13	1.08387e-48
Tnf	2.36961e-20	0.988487	0.634	0.296	8.24433e-16	6.27678e-48	1.35766	0.329	0.08	2.18382e-43	1.52707e-39	1.10753	0.669	0.424	5.31299e-35	9.1496e-36	0.515203	0.819	0.655	3.18333e-31	2.36961e-20	2.51071e-47
Gna12	2.82967e-46	0.909155	0.727	0.215	9.845e-42	9.21704e-39	0.777597	0.224	0.043	3.20679e-34	2.72312e-33	0.395521	0.455	0.205	9.47427e-29	1.218e-26	0.32364	0.59	0.429	4.23765e-22	1.218e-26	1.13187e-45
Arrb2	3.47958e-22	0.555457	0.826	0.46	1.21062e-17	1.26868e-45	0.987139	0.375	0.108	4.414e-41	2.20943e-44	0.496205	0.855	0.575	7.68704e-40	2.76292e-45	0.44879	0.78	0.594	9.61275e-41	3.47958e-22	5.07473e-45
P2ry6	6.46265e-34	0.682657	0.779	0.314	2.24849e-29	5.47336e-30	0.637857	0.261	0.079	1.90429e-25	2.8185e-28	0.439573	0.58	0.334	9.80612e-24	1.65289e-45	0.412943	0.831	0.607	5.75073e-41	2.8185e-28	6.61155e-45
Asah1	4.71311e-28	0.690315	0.895	0.502	1.63979e-23	1.86313e-19	0.430578	0.412	0.219	6.48221e-15	1.50056e-39	0.480022	0.731	0.441	5.22076e-35	9.04187e-44	0.38585	0.927	0.768	3.14585e-39	1.86313e-19	3.61675e-43
Rpl32	8.04675e-08	0.302169	0.983	0.944	0.00279963	1.84944e-13	0.288711	0.965	0.882	6.43458e-09	9.83658e-25	0.35915	0.98	0.921	3.42234e-20	1.20051e-43	0.297837	0.996	0.981	4.17681e-39	8.04675e-08	4.80204e-43
Spi1	2.93999e-28	0.62351	0.942	0.566	1.02288e-23	2.91503e-12	0.390975	0.484	0.315	1.0142e-07	2.35413e-35	0.275508	0.947	0.724	8.1905e-31	1.68826e-39	0.295783	0.974	0.841	5.87381e-35	2.91503e-12	6.75305e-39
Nmt1	2.14389e-36	0.86763	0.866	0.447	7.45902e-32	6.60742e-25	0.689177	0.331	0.132	2.29885e-20	2.70257e-27	0.420453	0.707	0.472	9.40278e-23	2.00738e-38	0.386408	0.72	0.572	6.98406e-34	6.60742e-25	8.0295e-38
Ccrl2	1.07078e-36	1.21569	0.686	0.237	3.72546e-32	4.01259e-21	0.656574	0.312	0.131	1.39606e-16	2.67305e-26	0.763614	0.539	0.32	9.30007e-22	4.50426e-38	0.519693	0.465	0.254	1.56712e-33	4.01259e-21	1.8017e-37
Rpl10a	2.57413e-16	0.475226	0.983	0.904	8.95593e-12	3.23809e-12	0.29366	0.819	0.665	1.1266e-07	1.3449e-36	0.478293	0.972	0.87	4.67918e-32	5.06895e-35	0.276151	0.996	0.966	1.76359e-30	3.23809e-12	5.3796e-36
Nckap1l	7.01604e-21	0.560915	0.808	0.457	2.44102e-16	8.97472e-13	0.339291	0.244	0.121	3.12249e-08	2.13168e-35	0.415029	0.768	0.49	7.41655e-31	6.74047e-27	0.33179	0.716	0.563	2.34515e-22	8.97472e-13	8.52673e-35
Rab7b	1.59091e-24	0.377173	0.61	0.254	5.5351e-20	7.44653e-11	0.311933	0.244	0.131	2.5908e-06	1.00163e-34	0.434691	0.59	0.311	3.48485e-30	2.51478e-24	0.366119	0.604	0.454	8.74943e-20	7.44653e-11	4.0065e-34
Ifngr2	5.51384e-25	0.595225	0.715	0.318	1.91837e-20	6.10883e-09	0.263564	0.224	0.127	0.000212539	4.86708e-24	0.283312	0.683	0.447	1.69335e-19	2.76103e-29	0.351239	0.669	0.521	9.60618e-25	6.10883e-09	1.10441e-28
Cebpzos	3.59177e-21	0.479309	0.564	0.218	1.24965e-16	4.09388e-25	0.66902	0.209	0.057	1.42434e-20	1.31777e-16	0.263842	0.244	0.108	4.5848e-12	3.48311e-27	0.322752	0.517	0.36	1.21184e-22	1.31777e-16	1.39324e-26
Mef2a	4.15346e-20	0.5257	0.872	0.536	1.44507e-15	2.93372e-14	0.30379	0.364	0.21	1.0207e-09	1.13917e-25	0.404843	0.842	0.632	3.96341e-21	3.29714e-24	0.317459	0.793	0.659	1.14714e-19	2.93372e-14	4.55669e-25
Pold4	3.67252e-24	0.646206	0.791	0.407	1.27774e-19	2.86174e-18	0.569253	0.22	0.08	9.95656e-14	8.3337e-18	0.281564	0.45	0.26	2.89946e-13	1.49846e-20	0.251269	0.624	0.459	5.21345e-16	8.3337e-18	1.46901e-23
Il10rb	5.8703e-20	0.425575	0.808	0.456	2.04239e-15	2.68299e-18	0.334097	0.275	0.129	9.33464e-14	1.90271e-21	0.269001	0.665	0.442	6.61991e-17	1.13719e-23	0.286061	0.811	0.66	3.9565e-19	2.68299e-18	4.54875e-23
Ptger4	1.29927e-14	0.593266	0.57	0.284	4.52044e-10	6.66032e-15	0.439026	0.209	0.089	2.31726e-10	1.22661e-19	0.284307	0.584	0.373	4.26762e-15	3.26158e-19	0.253845	0.267	0.154	1.13477e-14	1.29927e-14	4.90643e-19

## Sheet: C6
	Exp_1_(S005)_p_val	S005_avg_log2FC	S005_pct.1	S005_pct.2	S005_p_val_adj	Exp_2_(SP024)_p_val	SP024_avg_log2FC	SP024_pct.1	SP024_pct.2	SP024_p_val_adj	Exp_3_(LPS)_p_val	LPS_avg_log2FC	LPS_pct.1	LPS_pct.2	LPS_p_val_adj	Exp_4_(S006)_p_val	S006_avg_log2FC	S006_pct.1	S006_pct.2	S006_p_val_adj	max_pval	minimump_p_val
Fn1	3.41124e-214	3.41978	0.939	0.127	1.18684e-209	0	2.11475	0.951	0.305	0	0	2.93816	0.937	0.21	0	1.04596e-43	2.71954	0.756	0.136	3.6391e-39	1.04596e-43	0
Lpl	1.06803e-132	2.69273	0.809	0.152	3.71588e-128	4.09804e-297	2.04855	0.687	0.137	1.42579e-292	0	2.7433	0.984	0.356	0	0.000601104	0.770522	0.603	0.434	1	0.000601104	0
Ccl6	2.50303e-100	1.69977	0.992	0.467	8.70855e-96	4.66677e-283	1.32068	0.987	0.637	1.62366e-278	7.50009e-273	2.09221	0.996	0.599	2.60943e-268	2.25986e-27	1.62835	0.949	0.504	7.86252e-23	2.25986e-27	1.86671e-282
Clec4b1	5.13047e-152	1.55762	0.882	0.133	1.78499e-147	5.67351e-246	1.35905	0.757	0.223	1.97393e-241	2.30781e-263	1.5526	0.885	0.178	8.02932e-259	6.38139e-45	1.07229	0.551	0.031	2.22021e-40	6.38139e-45	9.23123e-263
Ear2	1.07685e-133	1.93654	0.667	0.054	3.74657e-129	2.1477e-197	1.53415	0.588	0.143	7.47229e-193	2.70457e-247	2.00323	0.731	0.083	9.40972e-243	1.15932e-18	0.784624	0.397	0.058	4.03352e-14	1.15932e-18	1.08183e-246
Gpx1	1.75916e-94	1.19557	0.996	0.836	6.12048e-90	2.08689e-93	0.563825	0.955	0.725	7.26071e-89	2.09651e-226	1.53215	0.994	0.765	7.29416e-222	5.15549e-09	0.449272	1	0.968	0.00017937	5.15549e-09	8.38602e-226
Cfp	5.55638e-110	1.49343	0.98	0.422	1.93318e-105	5.97918e-220	1.26484	0.851	0.348	2.08028e-215	3.54348e-207	1.39938	0.986	0.532	1.23285e-202	3.40441e-17	0.781698	0.987	0.7	1.18446e-12	3.40441e-17	2.39167e-219
Dok2	8.59991e-83	1.11613	0.943	0.406	2.99208e-78	4.11423e-140	0.820662	0.533	0.171	1.43142e-135	4.64348e-217	1.33868	0.958	0.417	1.61556e-212	1.64396e-16	0.793151	0.949	0.609	5.71967e-12	1.64396e-16	1.85739e-216
Ccr2	3.71794e-93	1.39271	0.988	0.434	1.29355e-88	3.02072e-143	0.522909	0.75	0.361	1.05097e-138	9.94786e-205	1.57454	0.98	0.404	3.46106e-200	5.33983e-60	2.26705	0.962	0.168	1.85783e-55	5.33983e-60	3.97915e-204
Gfra2	2.37146e-73	0.737496	0.638	0.129	8.2508e-69	2.69494e-85	0.570555	0.259	0.062	9.37622e-81	1.11301e-198	0.964011	0.686	0.097	3.87238e-194	5.33857e-12	0.553181	0.359	0.073	1.85739e-07	5.33857e-12	4.45204e-198
Ccl9	3.92894e-117	1.70598	1	0.419	1.36696e-112	1.65106e-193	1.01422	0.952	0.548	5.74436e-189	4.3248e-157	1.38561	1	0.756	1.50468e-152	1.09141e-22	1.15999	0.962	0.601	3.79724e-18	1.09141e-22	6.60423e-193
Lyz2	4.1294e-61	1.06148	1	0.704	1.4367e-56	1.11073e-108	0.617076	0.996	0.9	3.86446e-104	3.94366e-193	1.77272	0.998	0.81	1.37208e-188	7.23815e-20	1.37839	1	0.879	2.5183e-15	7.23815e-20	1.57746e-192
Batf3	5.11653e-82	1.05553	0.809	0.226	1.78014e-77	3.77795e-96	0.675171	0.393	0.127	1.31442e-91	6.46547e-192	1.16038	0.753	0.156	2.24947e-187	7.35866e-32	0.984814	0.756	0.164	2.56023e-27	7.35866e-32	2.58619e-191
Capg	3.46411e-33	0.559686	0.988	0.733	1.20523e-28	3.338e-138	0.842029	0.816	0.41	1.16136e-133	5.5241e-185	1.28413	0.964	0.563	1.92194e-180	5.42629e-32	1.28511	1	0.757	1.88791e-27	5.42629e-32	2.20964e-184
Adam8	2.52455e-61	0.661792	0.764	0.25	8.78341e-57	5.43806e-121	0.680502	0.427	0.128	1.89201e-116	1.2621e-184	1.42289	0.874	0.284	4.39109e-180	8.82431e-17	0.682127	0.577	0.151	3.07015e-12	8.82431e-17	5.04839e-184
Clec4a2	7.52021e-71	0.934509	0.886	0.328	2.61643e-66	1.67376e-156	0.898474	0.686	0.261	5.82335e-152	7.29015e-172	1.26057	0.953	0.434	2.53639e-167	3.46013e-12	0.587657	0.987	0.714	1.20385e-07	3.46013e-12	2.91606e-171
Fgfr1	8.09699e-75	0.90139	0.846	0.271	2.81711e-70	2.35328e-118	0.679781	0.453	0.149	8.18755e-114	8.97192e-172	1.20217	0.826	0.225	3.12151e-167	1.63638e-07	0.432949	0.474	0.194	0.0056933	1.63638e-07	3.58877e-171
Cd200r1	1.52022e-58	0.623206	0.618	0.155	5.28916e-54	1.22585e-101	0.740321	0.252	0.042	4.26499e-97	5.68958e-167	0.983907	0.7	0.136	1.97952e-162	0.00480746	0.265903	0.538	0.359	1	0.00480746	2.27583e-166
Anxa2	1.68468e-76	1.17145	0.996	0.787	5.86133e-72	1.45798e-130	0.744237	0.925	0.576	5.0726e-126	3.84624e-166	1.29137	0.996	0.672	1.33819e-161	1.07182e-47	1.64247	1	0.795	3.72908e-43	1.07182e-47	1.5385e-165
Gda	1.44335e-85	1.14884	0.902	0.294	5.0217e-81	1.02907e-163	0.799363	0.657	0.242	3.58033e-159	2.48677e-81	0.572207	0.996	0.691	8.65198e-77	7.6108e-18	0.745914	0.526	0.115	2.64795e-13	7.6108e-18	4.11626e-163
Crip1	7.83374e-70	1.19154	1	0.901	2.72551e-65	2.69559e-163	0.768847	1	0.975	9.3785e-159	4.26064e-161	1.40785	1	0.872	1.48236e-156	1.73532e-50	1.90296	1	0.933	6.03754e-46	1.73532e-50	1.07824e-162
Gm2a	6.35086e-69	1.12584	0.984	0.628	2.20959e-64	2.37523e-99	0.539454	0.839	0.508	8.2639e-95	3.79624e-160	1.30361	0.96	0.491	1.32079e-155	5.09771e-31	1.13907	0.962	0.665	1.7736e-26	5.09771e-31	1.5185e-159
Psap	2.38815e-107	1.57069	1	0.841	8.30885e-103	7.34458e-92	0.499193	0.996	0.859	2.55533e-87	2.81677e-158	1.32203	1	0.881	9.80011e-154	3.07343e-43	1.50455	1	0.929	1.06931e-38	3.07343e-43	1.12671e-157
Pltp	1.77965e-93	1.1187	0.98	0.365	6.19177e-89	5.11343e-157	0.707369	0.745	0.327	1.77907e-152	1.7241e-106	0.821096	0.945	0.491	5.9985e-102	1.88033e-06	0.393824	0.782	0.499	0.0654203	1.88033e-06	2.04537e-156
Olfm1	6.65224e-131	1.48544	0.931	0.237	2.31445e-126	5.12027e-87	0.619104	0.386	0.135	1.78144e-82	5.13745e-154	1.0155	0.838	0.258	1.78742e-149	8.78391e-72	1.55166	0.872	0.062	3.0561e-67	8.78391e-72	2.05498e-153
Unc119	5.57029e-55	0.921508	0.801	0.325	1.93801e-50	9.19957e-154	0.966882	0.44	0.098	3.20071e-149	4.30334e-93	0.608006	0.516	0.12	1.49722e-88	5.72118e-11	0.702237	0.769	0.407	1.99051e-06	5.72118e-11	3.67983e-153
Tnip3	4.36743e-118	2.06214	0.833	0.173	1.51952e-113	7.20913e-148	1.0238	0.768	0.344	2.5082e-143	2.82422e-103	0.990546	0.877	0.409	9.82604e-99	2.60112e-70	1.97452	0.833	0.058	9.04983e-66	2.60112e-70	2.88365e-147
Kcnn4	1.18592e-32	0.506973	0.569	0.213	4.12604e-28	3.64972e-89	0.708501	0.298	0.073	1.26981e-84	8.68697e-148	1.02739	0.753	0.202	3.02237e-143	3.19559e-22	0.662887	0.526	0.086	1.11181e-17	3.19559e-22	3.47479e-147
Mmp19	1.26491e-55	1.0874	0.407	0.055	4.40087e-51	3.62533e-145	1.26024	0.403	0.08	1.26132e-140	2.18367e-134	1.7579	0.82	0.339	7.59741e-130	0.00062444	0.471747	0.218	0.095	1	0.00062444	1.45013e-144
H2-DMa	6.34154e-102	1.41116	1	0.456	2.20635e-97	3.34023e-139	0.792954	0.914	0.546	1.16213e-134	2.49958e-143	1.23747	0.919	0.398	8.69652e-139	4.40954e-89	2.47926	0.987	0.284	1.53417e-84	4.40954e-89	9.9983e-143
Naaa	6.24064e-135	1.70946	0.959	0.301	2.17124e-130	2.5933e-112	0.479301	0.588	0.262	9.02262e-108	4.05365e-56	0.437626	0.804	0.448	1.41035e-51	1.90833e-40	1.42858	0.885	0.241	6.63947e-36	1.90833e-40	2.49626e-134
Cotl1	1.1446e-61	0.914731	0.984	0.812	3.98228e-57	9.64745e-85	0.48818	0.777	0.466	3.35654e-80	6.74356e-134	1.04968	0.97	0.663	2.34622e-129	6.73498e-12	0.580895	1	0.879	2.34324e-07	6.73498e-12	2.69743e-133
Zyx	4.82102e-87	1.17257	0.98	0.58	1.67733e-82	7.55533e-101	0.518064	0.529	0.23	2.62865e-96	1.14637e-131	1.05519	0.947	0.52	3.98844e-127	4.49989e-12	0.680561	0.91	0.69	1.5656e-07	4.49989e-12	4.58547e-131
H2-DMb1	3.52625e-106	1.5041	0.992	0.401	1.22685e-101	1.55394e-113	0.56221	0.848	0.495	5.40646e-109	2.88937e-128	1.15922	0.868	0.34	1.00527e-123	4.69225e-82	2.61231	0.923	0.169	1.63253e-77	4.69225e-82	1.15575e-127
Sept11	2.12656e-44	0.730587	0.935	0.554	7.39872e-40	5.94071e-127	0.779129	0.564	0.206	2.06689e-122	2.60335e-64	0.544964	0.883	0.52	9.05758e-60	9.06601e-08	0.537837	0.654	0.346	0.00315425	9.06601e-08	2.37628e-126
Ahcyl2	8.32145e-65	0.892211	0.87	0.346	2.8952e-60	1.34629e-95	0.633482	0.375	0.119	4.684e-91	1.21694e-126	0.897755	0.903	0.393	4.23399e-122	3.25922e-08	0.375748	0.526	0.22	0.00113395	3.25922e-08	4.86778e-126
Tagln2	3.44328e-30	0.58291	1	0.865	1.19799e-25	1.37104e-75	0.444898	0.885	0.612	4.77012e-71	3.10726e-123	1.05334	0.986	0.788	1.08108e-118	1.89816e-12	0.669169	1	0.939	6.60406e-08	1.89816e-12	1.2429e-122
Eps8	6.59506e-88	1.12776	0.935	0.335	2.29455e-83	4.10452e-123	0.686463	0.566	0.22	1.42805e-118	6.56605e-109	0.838566	0.753	0.262	2.28446e-104	2.48262e-13	0.631833	0.91	0.529	8.63754e-09	2.48262e-13	1.64181e-122
Ltb4r1	5.93618e-59	0.523328	0.817	0.329	2.06532e-54	5.8428e-121	0.825813	0.454	0.136	2.03283e-116	2.21776e-121	0.664173	0.715	0.219	7.71604e-117	1.16108e-47	1.20567	0.872	0.136	4.03963e-43	1.16108e-47	8.87105e-121
Rras2	3.57767e-78	0.754021	0.598	0.095	1.24474e-73	4.4501e-89	0.68487	0.238	0.043	1.54828e-84	8.72845e-120	0.63789	0.536	0.098	3.0368e-115	5.33066e-07	0.301112	0.295	0.084	0.0185464	5.33066e-07	3.49138e-119
Socs6	1.24207e-82	1.08285	0.675	0.137	4.32142e-78	2.91974e-106	0.747346	0.318	0.072	1.01584e-101	3.42639e-118	0.952468	0.686	0.203	1.19211e-113	0.000110129	0.292327	0.385	0.178	1	0.000110129	1.37056e-117
Smdt1	2.16357e-24	0.516266	0.935	0.689	7.5275e-20	1.59838e-109	0.726707	0.762	0.398	5.56109e-105	4.15046e-117	0.921492	0.945	0.644	1.44403e-112	0.000846174	0.258695	0.962	0.849	1	0.000846174	1.66018e-116
Plxnd1	5.55363e-100	1.21619	0.915	0.298	1.93222e-95	1.14605e-115	0.728293	0.428	0.129	3.98735e-111	6.38033e-116	0.783289	0.775	0.265	2.21984e-111	5.97816e-13	0.672091	0.731	0.337	2.07992e-08	5.97816e-13	2.55213e-115
Csf2ra	1.68545e-63	0.931684	0.898	0.395	5.86402e-59	5.14779e-115	0.675537	0.598	0.252	1.79102e-110	4.4799e-79	0.71999	0.913	0.55	1.55865e-74	1.94023e-21	0.920956	0.923	0.537	6.75044e-17	1.94023e-21	2.05912e-114
Itgax	8.09576e-29	0.434253	0.484	0.183	2.81668e-24	5.65382e-40	0.255361	0.23	0.103	1.96708e-35	2.80409e-113	0.977414	0.757	0.258	9.75599e-109	5.82618e-14	0.430984	0.333	0.052	2.02704e-09	5.82618e-14	1.12164e-112
S100a10	1.28162e-32	0.676613	1	0.848	4.45902e-28	6.1201e-112	0.732895	0.951	0.689	2.12931e-107	5.05999e-106	1.03012	0.988	0.793	1.76047e-101	4.45982e-24	1.11043	1	0.878	1.55166e-19	4.45982e-24	2.44804e-111
Rbpj	2.89953e-43	0.729071	0.976	0.667	1.0088e-38	1.00186e-98	0.551403	0.661	0.335	3.48568e-94	1.65569e-111	0.857087	0.99	0.751	5.76047e-107	2.11778e-09	0.485529	0.962	0.722	7.36819e-05	2.11778e-09	6.62276e-111
Phlda1	1.15141e-56	1.28368	0.793	0.306	4.00597e-52	3.14337e-109	0.847229	0.496	0.175	1.09364e-104	2.64285e-69	0.727816	0.723	0.324	9.19499e-65	1.02161e-09	0.649293	0.744	0.391	3.55438e-05	1.02161e-09	1.25735e-108
Cyba	1.37767e-32	0.584948	0.992	0.921	4.79319e-28	1.09441e-74	0.494655	0.961	0.782	3.80766e-70	8.11282e-108	0.807924	0.998	0.874	2.82261e-103	1.15491e-09	0.47636	1	0.968	4.01816e-05	1.15491e-09	3.24513e-107
Psma7	1.11928e-26	0.526678	0.967	0.749	3.89421e-22	1.58999e-106	0.621429	0.837	0.488	5.5319e-102	8.41947e-72	0.689859	0.958	0.735	2.9293e-67	9.0179e-13	0.575494	0.987	0.859	3.13751e-08	9.0179e-13	6.35997e-106
Metrnl	1.80134e-66	0.999245	0.915	0.393	6.26724e-62	1.50469e-84	0.344535	0.542	0.279	5.23511e-80	4.58033e-104	0.930615	0.879	0.463	1.59359e-99	2.4123e-10	0.588416	0.923	0.612	8.39288e-06	2.4123e-10	1.83213e-103
Prcp	1.65121e-62	0.85136	0.951	0.471	5.74487e-58	5.4524e-104	0.392398	0.614	0.306	1.897e-99	3.50422e-69	0.513205	0.917	0.552	1.21919e-64	5.23837e-05	0.29239	0.821	0.586	1	5.23837e-05	2.18096e-103
Anxa4	1.81077e-50	0.536631	0.76	0.292	6.30003e-46	6.06343e-55	0.32849	0.276	0.114	2.10959e-50	1.08203e-103	0.844572	0.881	0.44	3.76458e-99	5.25157e-10	0.594499	0.808	0.455	1.82713e-05	5.25157e-10	4.3281e-103
Qpct	8.6179e-56	0.914561	0.736	0.249	2.99834e-51	4.79042e-103	0.735933	0.438	0.145	1.66668e-98	7.24457e-36	0.271225	0.364	0.139	2.52053e-31	4.92706e-16	0.887447	0.667	0.266	1.71422e-11	4.92706e-16	1.91617e-102
Nme1	4.87895e-25	0.382437	0.89	0.58	1.69748e-20	1.25375e-101	0.550297	0.635	0.306	4.36205e-97	1.6665e-43	0.405163	0.925	0.666	5.7981e-39	6.40737e-16	0.727551	0.949	0.714	2.22925e-11	6.40737e-16	5.01501e-101
Actg1	1.04171e-79	1.05755	1	0.981	3.62433e-75	3.70029e-84	0.453988	0.994	0.871	1.28741e-79	4.57029e-101	0.784328	1	0.974	1.59009e-96	1.88057e-24	0.863428	1	0.991	6.54288e-20	1.88057e-24	1.82811e-100
Myl6	8.88884e-21	0.428237	1	0.962	3.09261e-16	2.67726e-71	0.474292	0.957	0.782	9.31473e-67	8.55057e-97	0.703708	1	0.936	2.97491e-92	3.01655e-10	0.426975	0.987	0.983	1.04952e-05	3.01655e-10	3.42023e-96
Lgals3	3.85717e-53	0.926032	0.992	0.661	1.34199e-48	2.57073e-96	0.486122	0.929	0.637	8.94407e-92	1.06414e-75	0.665939	0.858	0.452	3.70236e-71	1.57336e-37	1.867	1	0.635	5.47402e-33	1.57336e-37	1.02829e-95
Pfkp	6.23954e-38	0.558651	0.752	0.336	2.17086e-33	1.04568e-66	0.470784	0.3	0.108	3.63812e-62	8.63487e-95	0.941602	0.804	0.365	3.00424e-90	1.72211e-16	0.461795	0.679	0.23	5.99155e-12	1.72211e-16	3.45395e-94
Pycard	2.78336e-23	0.346206	0.821	0.509	9.68388e-19	2.40824e-76	0.562366	0.472	0.21	8.37876e-72	3.93184e-94	0.85719	0.955	0.604	1.36797e-89	9.10453e-09	0.491904	0.949	0.735	0.000316765	9.10453e-09	1.57274e-93
Itgam	2.91151e-51	0.612362	0.886	0.414	1.01297e-46	4.21366e-94	0.476786	0.509	0.225	1.46602e-89	3.0773e-81	0.635277	1	0.759	1.07065e-76	8.55219e-09	0.524736	0.821	0.512	0.000297548	8.55219e-09	1.68546e-93
Tmsb4x	9.60932e-16	0.348943	1	1	3.34327e-11	3.81002e-60	0.325078	1	0.999	1.32558e-55	7.56677e-94	0.872967	1	0.997	2.63263e-89	3.00608e-06	0.388959	1	1	0.104587	3.00608e-06	3.02671e-93
Ahnak	4.20691e-59	0.929343	1	0.825	1.46367e-54	3.11329e-93	0.413121	0.894	0.594	1.08317e-88	2.34048e-78	0.721763	0.998	0.759	8.14299e-74	5.1749e-12	0.685712	1	0.87	1.80045e-07	5.1749e-12	1.24531e-92
Slamf9	4.21909e-88	1.13212	0.902	0.29	1.46791e-83	1.03304e-77	0.417787	0.426	0.188	3.59415e-73	5.50767e-93	0.76475	0.901	0.464	1.91623e-88	5.76459e-13	0.595111	0.641	0.238	2.00562e-08	5.76459e-13	2.20307e-92
Rassf4	4.48859e-81	1.07763	0.967	0.441	1.56167e-76	2.69116e-92	0.446517	0.492	0.218	9.36309e-88	1.57092e-47	0.447789	0.917	0.631	5.46553e-43	3.79423e-13	0.634882	0.936	0.596	1.32009e-08	3.79423e-13	1.07646e-91
Uqcc2	6.48429e-35	0.530798	0.801	0.403	2.25602e-30	9.9235e-92	0.460542	0.489	0.217	3.45258e-87	2.04979e-50	0.400389	0.763	0.423	7.13162e-46	9.29175e-05	0.250117	0.782	0.548	1	9.29175e-05	3.9694e-91
Adssl1	3.42857e-49	0.574707	0.646	0.2	1.19287e-44	5.38778e-49	0.336654	0.206	0.072	1.87452e-44	2.4783e-91	0.518505	0.569	0.156	8.62251e-87	6.0065e-21	0.65842	0.756	0.237	2.08978e-16	6.0065e-21	9.91321e-91
Arf5	4.54089e-37	0.592771	0.992	0.841	1.57986e-32	1.08345e-89	0.379393	0.818	0.513	3.76955e-85	1.81835e-72	0.608831	0.974	0.791	6.32639e-68	3.69556e-10	0.468817	0.987	0.888	1.28576e-05	3.69556e-10	4.33382e-89
Tuba1a	2.94783e-48	0.881833	0.89	0.452	1.02561e-43	1.88968e-73	0.608244	0.457	0.2	6.57458e-69	3.41285e-89	0.731186	0.711	0.265	1.1874e-84	2.17976e-09	0.595226	0.795	0.456	7.5838e-05	2.17976e-09	1.36514e-88
Lsp1	1.51983e-54	0.851356	0.996	0.849	5.2878e-50	5.90239e-89	0.455119	0.87	0.566	2.05356e-84	2.24731e-53	0.433297	0.911	0.599	7.81885e-49	3.4126e-37	1.47225	0.987	0.73	1.18731e-32	3.4126e-37	2.36095e-88
Pitpna	6.11091e-33	0.553397	0.972	0.713	2.12611e-28	3.29406e-88	0.292304	0.66	0.381	1.14607e-83	6.71718e-43	0.424898	0.968	0.765	2.33704e-38	2.87116e-11	0.512074	0.987	0.835	9.98936e-07	2.87116e-11	1.31763e-87
Flna	3.99269e-59	0.980677	0.955	0.627	1.38914e-54	3.95216e-88	0.404117	0.593	0.308	1.37504e-83	4.63607e-76	0.687017	0.962	0.682	1.61298e-71	3.06577e-18	0.829329	0.987	0.673	1.06664e-13	3.06577e-18	1.58087e-87
Rps27l	8.60112e-34	0.634589	0.927	0.636	2.9925e-29	4.15737e-88	0.556354	0.812	0.493	1.44643e-83	3.35243e-43	0.442061	0.935	0.7	1.16638e-38	3.2017e-07	0.500095	0.962	0.819	0.0111394	3.2017e-07	1.66295e-87
H2-DMb2	1.81325e-44	0.548142	0.537	0.146	6.30864e-40	8.00015e-88	0.723262	0.322	0.089	2.78341e-83	1.78894e-74	0.618295	0.443	0.106	6.22409e-70	2.73028e-20	0.464634	0.397	0.048	9.49919e-16	2.73028e-20	3.20006e-87
Arpc1b	1.37432e-33	0.569728	0.988	0.912	4.78154e-29	1.15363e-79	0.503497	0.893	0.616	4.0137e-75	6.36447e-86	0.626275	0.99	0.864	2.21433e-81	7.45201e-13	0.47821	1	0.976	2.5927e-08	7.45201e-13	2.54579e-85
Psma4	5.68498e-31	0.659577	0.878	0.577	1.97792e-26	4.92993e-80	0.640829	0.537	0.246	1.71522e-75	3.52285e-84	0.75651	0.913	0.598	1.22567e-79	1.43319e-13	0.636308	0.949	0.788	4.98635e-09	1.43319e-13	1.40914e-83
Lilra6	1.83088e-72	0.698929	0.61	0.113	6.36999e-68	1.96534e-69	0.498944	0.219	0.055	6.8378e-65	6.10438e-84	0.426313	0.46	0.109	2.12384e-79	4.18214e-19	0.637928	0.423	0.059	1.45505e-14	4.18214e-19	2.44175e-83
Tpi1	7.10625e-35	0.496015	0.907	0.534	2.47241e-30	2.00639e-66	0.430775	0.34	0.137	6.98065e-62	1.13974e-82	0.883734	0.949	0.618	3.96537e-78	6.39634e-07	0.506838	0.897	0.748	0.0222541	6.39634e-07	4.55894e-82
Sept9	1.18587e-41	0.59451	0.85	0.419	4.12588e-37	2.46177e-82	0.454735	0.307	0.098	8.56501e-78	5.64339e-63	0.521351	0.765	0.383	1.96345e-58	2.25154e-06	0.339495	0.808	0.531	0.0783356	2.25154e-06	9.8471e-82
Ybx1	2.14974e-33	0.556306	0.988	0.89	7.47938e-29	2.65531e-70	0.482208	0.817	0.537	9.23836e-66	3.23958e-81	0.642381	0.984	0.865	1.12711e-76	1.69954e-06	0.357658	1	0.945	0.0591303	1.69954e-06	1.29583e-80
Colgalt1	4.54133e-64	0.893497	0.874	0.354	1.58002e-59	1.75002e-64	0.446587	0.295	0.106	6.08866e-60	8.44784e-80	0.751769	0.846	0.453	2.93917e-75	1.76892e-10	0.510385	0.91	0.589	6.15441e-06	1.76892e-10	3.37913e-79
Alcam	2.18026e-70	0.842572	0.821	0.263	7.58554e-66	1.22429e-79	0.569524	0.403	0.156	4.25955e-75	5.87819e-55	0.27673	0.575	0.259	2.04514e-50	4.90883e-36	0.947269	0.744	0.12	1.70788e-31	4.90883e-36	4.89716e-79
Glud1	1.08333e-33	0.646369	0.931	0.65	3.76913e-29	5.29402e-77	0.301787	0.497	0.256	1.84189e-72	5.69123e-43	0.362928	0.903	0.625	1.98009e-38	3.90056e-10	0.545435	0.949	0.722	1.35708e-05	3.90056e-10	2.11761e-76
Pgam1	1.14699e-23	0.320623	0.866	0.563	3.99061e-19	8.3669e-68	0.427797	0.378	0.161	2.91101e-63	5.36868e-77	0.750457	0.943	0.636	1.86787e-72	9.52249e-15	0.73296	0.936	0.718	3.31307e-10	9.52249e-15	2.14747e-76
Mpp6	1.61285e-59	0.836472	0.858	0.35	5.61144e-55	4.0107e-73	0.472632	0.316	0.113	1.3954e-68	1.11581e-57	0.370724	0.577	0.237	3.88212e-53	1.51577e-13	0.676829	0.833	0.473	5.27368e-09	1.51577e-13	1.60428e-72
Arpc2	5.41759e-46	0.585898	1	0.951	1.88489e-41	1.19506e-72	0.255832	0.874	0.621	4.15784e-68	1.03671e-37	0.358347	0.994	0.914	3.60693e-33	2.46111e-06	0.294141	1	0.978	0.0856268	2.46111e-06	4.78023e-72
Hpcal1	6.46693e-49	0.556215	0.821	0.352	2.24997e-44	2.15638e-71	0.312166	0.305	0.122	7.50248e-67	1.70836e-60	0.365578	0.747	0.377	5.94371e-56	1.65914e-06	0.378109	0.705	0.415	0.0577249	1.65914e-06	8.62552e-71
Tkt	1.48152e-36	0.586343	0.939	0.59	5.1545e-32	2.41762e-71	0.261861	0.523	0.291	8.41137e-67	2.45448e-51	0.459768	0.917	0.617	8.53961e-47	1.50944e-11	0.576927	0.974	0.752	5.25164e-07	1.50944e-11	9.67047e-71
Tep1	2.71331e-63	0.838991	0.87	0.347	9.44014e-59	2.73484e-71	0.354616	0.39	0.174	9.51506e-67	1.47372e-58	0.370056	0.65	0.297	5.12736e-54	5.21389e-11	0.612024	0.692	0.341	1.81402e-06	5.21389e-11	1.09394e-70
Sdf2l1	7.1935e-27	0.401781	0.736	0.389	2.50276e-22	1.74697e-69	0.25716	0.422	0.214	6.07807e-65	2.51737e-33	0.337505	0.516	0.257	8.75845e-29	1.24867e-13	0.7231	0.795	0.505	4.34438e-09	1.24867e-13	6.98789e-69
Tiam1	1.51389e-55	0.765885	0.785	0.287	5.26714e-51	1.82063e-68	0.365019	0.279	0.1	6.33435e-64	9.36485e-58	0.430265	0.666	0.308	3.25822e-53	4.8679e-19	0.434375	0.59	0.152	1.69364e-14	4.8679e-19	7.28254e-68
Ank	3.9694e-58	0.549776	0.711	0.228	1.38103e-53	1.8437e-57	0.35589	0.252	0.092	6.41461e-53	2.24347e-67	0.314192	0.51	0.177	7.80547e-63	3.09529e-14	0.440184	0.449	0.1	1.07691e-09	3.09529e-14	8.97387e-67
Far1	4.7613e-29	0.347227	0.797	0.442	1.65655e-24	1.21276e-65	0.281699	0.352	0.159	4.21943e-61	3.96624e-59	0.363059	0.818	0.459	1.37994e-54	2.04425e-09	0.269692	0.795	0.456	7.11236e-05	2.04425e-09	4.85103e-65
Rnh1	1.844e-20	0.418338	0.825	0.531	6.41566e-16	5.43765e-62	0.35791	0.431	0.214	1.89187e-57	1.86405e-56	0.345161	0.787	0.436	6.48542e-52	1.4404e-09	0.739958	0.91	0.729	5.01145e-05	1.4404e-09	2.17506e-61
Vcp	1.19892e-28	0.435757	0.923	0.602	4.17128e-24	3.58677e-60	0.42639	0.411	0.197	1.24791e-55	2.50272e-35	0.258613	0.903	0.656	8.70747e-31	0.00940206	0.27419	0.897	0.766	1	0.00940206	1.43471e-59
Ccdc88a	8.63553e-57	0.866596	0.817	0.321	3.00447e-52	4.86054e-60	0.304522	0.334	0.151	1.69108e-55	3.95435e-54	0.481217	0.775	0.423	1.3758e-49	1.97206e-08	0.50815	0.744	0.413	0.000686119	1.97206e-08	1.94422e-59
Capn2	1.94127e-53	0.761462	0.874	0.403	6.75407e-49	4.42135e-48	0.255756	0.247	0.106	1.53828e-43	3.22415e-54	0.388693	0.648	0.303	1.12175e-49	2.53812e-05	0.425023	0.679	0.457	0.883064	2.53812e-05	1.28966e-53
Egr2	1.79354e-45	0.471971	0.398	0.07	6.24007e-41	4.57104e-42	0.370028	0.2	0.073	1.59035e-37	5.1796e-54	0.48038	0.322	0.072	1.80209e-49	1.46486e-09	0.357094	0.474	0.167	5.09656e-05	1.46486e-09	2.07184e-53
Ybx3	5.33635e-33	0.493111	0.813	0.431	1.85662e-28	1.28489e-53	0.255252	0.265	0.115	4.47039e-49	1.02895e-34	0.336932	0.812	0.539	3.57994e-30	2.80996e-19	0.830911	0.859	0.419	9.77641e-15	2.80996e-19	5.13956e-53

## Sheet: C7
	Exp_1_(S005)_p_val	S005_avg_log2FC	S005_pct.1	S005_pct.2	S005_p_val_adj	Exp_2_(SP024)_p_val	SP024_avg_log2FC	SP024_pct.1	SP024_pct.2	SP024_p_val_adj	Exp_3_(LPS)_p_val	LPS_avg_log2FC	LPS_pct.1	LPS_pct.2	LPS_p_val_adj	Exp_4_(S006)_p_val	S006_avg_log2FC	S006_pct.1	S006_pct.2	S006_p_val_adj	max_pval	minimump_p_val
Plac8	6.40935e-165	3.87148	0.935	0.133	2.22994e-160	0	3.93653	0.844	0.134	0	2.54218e-198	3.95731	0.949	0.183	8.84475e-194	0	4.34563	0.973	0.159	0	6.40935e-165	0
Ifitm3	8.84913e-143	2.75282	1	0.543	3.07879e-138	0	1.87911	0.937	0.657	0	3.48626e-14	0.537989	0.977	0.916	1.21294e-09	0	2.7496	0.975	0.623	0	3.48626e-14	0
Cebpb	9.04965e-130	2.63345	0.993	0.607	3.14855e-125	2.853e-279	1.65574	0.969	0.685	9.92616e-275	1.24732e-54	1.31094	0.994	0.821	4.33966e-50	0	2.37919	0.999	0.866	0	1.24732e-54	0
Smpdl3a	8.38135e-113	1.88934	0.954	0.481	2.91604e-108	1.62654e-128	1.76079	0.387	0.098	5.65906e-124	5.26362e-08	0.395448	0.411	0.218	0.00183132	0	2.30964	0.879	0.35	0	5.26362e-08	0
Hp	2.60926e-103	1.95397	0.863	0.105	9.07814e-99	7.81017e-102	1.70858	0.291	0.038	2.71731e-97	5.75585e-140	3.05818	0.926	0.133	2.00257e-135	0	2.19345	0.808	0.087	0	7.81017e-102	0
Msrb1	9.28612e-93	1.87281	0.961	0.413	3.23083e-88	2.32782e-176	1.82525	0.617	0.188	8.09894e-172	4.05506e-80	1.68758	0.874	0.436	1.41084e-75	0	2.48566	0.976	0.456	0	4.05506e-80	0
Prdx5	6.3692e-90	1.67762	0.967	0.661	2.21597e-85	7.8648e-186	1.64792	0.628	0.364	2.73632e-181	1.38244e-81	1.69819	0.949	0.724	4.80979e-77	0	2.06482	0.962	0.805	0	1.38244e-81	0
Ifitm6	2.33932e-88	1.56269	0.915	0.174	8.13896e-84	1.52171e-164	2.03705	0.45	0.114	5.29433e-160	8.40529e-25	0.515025	0.503	0.156	2.92437e-20	0	2.59935	0.892	0.102	0	8.40529e-25	0
Gngt2	2.7719e-80	2.07638	0.771	0.234	9.644e-76	2.11721e-297	2.79285	0.61	0.146	7.3662e-293	4.90066e-77	1.99071	0.674	0.214	1.70504e-72	0	2.21554	0.666	0.227	0	4.90066e-77	0
Nr4a1	1.99754e-75	1.94804	0.961	0.48	6.94983e-71	7.48617e-63	1.24218	0.45	0.274	2.60459e-58	8.02957e-25	0.982564	0.794	0.458	2.79365e-20	0	1.96478	0.955	0.625	0	8.02957e-25	0
Napsa	4.15617e-72	1.63611	0.935	0.333	1.44602e-67	6.43327e-82	1.30057	0.395	0.2	2.23826e-77	4.95719e-29	0.900268	0.686	0.283	1.72471e-24	0	2.243	0.872	0.169	0	4.95719e-29	0
Samhd1	3.84335e-70	1.42145	0.98	0.665	1.33718e-65	5.52511e-64	1.08088	0.451	0.277	1.9223e-59	1.04374e-09	0.41751	0.937	0.857	3.63137e-05	0	1.92906	0.948	0.677	0	1.04374e-09	0
Sat1	1.11953e-69	1.56792	0.993	0.797	3.89506e-65	6.61904e-215	1.71395	0.825	0.616	2.3029e-210	2.96027e-16	0.807088	0.851	0.778	1.02994e-11	0	1.40045	0.976	0.9	0	2.96027e-16	0
Mpeg1	2.00659e-68	1.53476	0.954	0.35	6.98132e-64	3.7927e-29	0.606205	0.36	0.314	1.31956e-24	4.77411e-23	0.713146	0.891	0.572	1.66101e-18	0	1.90279	0.888	0.363	0	4.77411e-23	0
Gsr	4.00082e-65	1.37327	0.889	0.24	1.39197e-60	1.88084e-178	2.137	0.466	0.076	6.5438e-174	1.37735e-51	1.39596	0.806	0.412	4.79206e-47	0	2.14499	0.886	0.347	0	1.37735e-51	0
Tpd52	5.07109e-64	1.40552	0.902	0.455	1.76433e-59	2.76805e-76	1.25029	0.463	0.221	9.6306e-72	1.75293e-29	0.90495	0.806	0.505	6.09879e-25	0	1.34083	0.903	0.726	0	1.75293e-29	0
Fam49b	1.13727e-60	1.08563	0.954	0.709	3.9568e-56	5.04731e-54	0.834768	0.407	0.317	1.75606e-49	4.89311e-21	0.693346	0.886	0.785	1.70241e-16	0	1.14458	0.912	0.819	0	4.89311e-21	0
Mcemp1	2.15296e-60	1.12102	0.771	0.157	7.49056e-56	2.45393e-51	1.1386	0.222	0.051	8.5377e-47	3.64839e-32	0.862626	0.497	0.121	1.26935e-27	0	1.66265	0.688	0.078	0	3.64839e-32	0
Fgr	7.78247e-60	1.36016	0.765	0.21	2.70768e-55	7.31412e-56	1.16355	0.243	0.104	2.54473e-51	1.24255e-20	0.805353	0.8	0.527	4.32309e-16	0	1.85279	0.671	0.085	0	1.24255e-20	0
Thbs1	7.59905e-58	2.45791	0.588	0.075	2.64386e-53	3.45559e-98	1.96086	0.401	0.111	1.20227e-93	8.00087e-09	0.456577	0.229	0.078	0.000278366	0	2.9216	0.761	0.138	0	8.00087e-09	0
Coro1a	1.0598e-54	1.03338	0.993	0.908	3.68726e-50	4.44676e-67	0.782887	0.69	0.606	1.54712e-62	2.81904e-09	0.406076	0.914	0.841	9.808e-05	0	1.61761	0.997	0.928	0	2.81904e-09	0
Taldo1	6.34358e-51	1.10562	0.961	0.732	2.20706e-46	1.40535e-56	0.912104	0.406	0.295	4.88949e-52	7.11974e-05	0.307329	0.663	0.539	1	0	1.50055	0.955	0.847	0	7.11974e-05	0
Ptpn1	1.87071e-48	1.17654	0.843	0.513	6.50857e-44	7.31463e-29	0.779458	0.251	0.163	2.5449e-24	4.35249e-52	1.21992	0.897	0.688	1.51432e-47	0	1.31827	0.796	0.577	0	7.31463e-29	0
Adgre4	3.41062e-45	1.2556	0.333	0.055	1.18662e-40	9.4462e-131	1.93143	0.303	0.044	3.28652e-126	1.63742e-21	0.721194	0.297	0.063	5.69693e-17	0	2.06136	0.596	0.051	0	1.63742e-21	0
Ncf2	2.64667e-41	1.07675	0.922	0.522	9.2083e-37	1.01781e-31	0.674914	0.271	0.217	3.54116e-27	1.66562e-28	0.839472	0.771	0.528	5.79502e-24	0	1.24435	0.885	0.732	0	1.66562e-28	0
Tmsb10	6.61936e-38	1.18365	0.98	0.765	2.30301e-33	1.16147e-98	0.989831	0.907	0.788	4.041e-94	1.29477e-30	1.13717	0.874	0.622	4.50476e-26	0	1.80049	0.978	0.774	0	1.29477e-30	0
Tnfrsf1b	4.04524e-35	1.04542	0.739	0.286	1.40742e-30	1.3391e-25	0.835157	0.202	0.105	4.65901e-21	6.82821e-64	1.50486	0.829	0.513	2.37567e-59	0	1.52565	0.687	0.359	0	1.3391e-25	0
Ly6e	5.59495e-32	0.895735	1	0.852	1.9466e-27	4.50222e-168	1.6588	0.726	0.347	1.56641e-163	1.08229e-20	0.58562	0.983	0.968	3.76551e-16	0	1.91863	0.986	0.727	0	1.08229e-20	0
Itga4	2.08622e-29	1.04516	0.83	0.463	7.25837e-25	3.68168e-36	0.812496	0.268	0.194	1.28093e-31	1.39784e-05	0.36482	0.617	0.453	0.486335	0	2.0545	0.854	0.512	0	1.39784e-05	0
Itgal	4.59098e-21	1.18526	0.712	0.353	1.59729e-16	1.00778e-160	2.08829	0.471	0.122	3.50625e-156	6.23867e-59	1.58119	0.829	0.352	2.17056e-54	0	2.83511	0.899	0.213	0	4.59098e-21	0
Cd52	5.35664e-14	0.394956	0.987	0.831	1.86368e-09	1.71577e-12	0.276533	0.845	0.789	5.9695e-08	3.7618e-17	0.537666	0.949	0.747	1.30881e-12	0	1.76623	0.982	0.626	0	1.71577e-12	0
Myl12b	5.76412e-10	0.393579	0.961	0.852	2.00545e-05	7.58573e-36	0.671652	0.352	0.302	2.63923e-31	0.000535061	0.297664	0.691	0.567	1	0	1.24117	0.926	0.83	0	0.000535061	0
Itgb2	5.33976e-08	0.398714	0.791	0.571	0.00185781	8.30421e-54	0.925654	0.331	0.246	2.8892e-49	1.38638e-49	1.19529	0.857	0.556	4.82348e-45	0	1.49116	0.76	0.491	0	5.33976e-08	0
Klra2	1.57195e-64	1.3216	0.634	0.087	5.46913e-60	1.2262e-65	1.27474	0.234	0.068	4.26619e-61	2.09861e-16	0.652748	0.571	0.274	7.30147e-12	8.64615e-322	1.4613	0.525	0.041	3.00817e-317	2.09861e-16	3.45846e-321
Emilin2	1.78048e-65	1.39112	0.81	0.232	6.19465e-61	3.96214e-35	0.930537	0.259	0.126	1.37851e-30	6.71783e-53	1.22999	0.68	0.291	2.33727e-48	5.27761e-320	1.44386	0.695	0.291	1.83619e-315	3.96214e-35	2.11104e-319
H3f3a	2.92842e-64	0.965431	1	0.983	1.01886e-59	1.18693e-92	0.766423	0.841	0.77	4.12958e-88	1.28855e-21	0.526262	0.96	0.931	4.48313e-17	0	0.821236	0.993	0.997	0	1.28855e-21	0
Cd300a	1.33146e-69	1.43718	0.863	0.281	4.63243e-65	9.1369e-77	1.3643	0.31	0.117	3.17891e-72	1.25537e-13	0.666884	0.394	0.206	4.36767e-09	0	1.28092	0.865	0.64	1.28943e-307	1.25537e-13	0
Pou2f2	4.3018e-41	1.47586	0.765	0.276	1.49668e-36	1.85532e-102	1.73623	0.311	0.065	6.45503e-98	4.89076e-62	1.53028	0.926	0.588	1.70159e-57	7.11038e-303	1.57042	0.746	0.476	2.47384e-298	4.3018e-41	2.84415e-302
Adgre5	3.23564e-08	0.513224	0.843	0.648	0.00112574	2.01925e-28	0.55079	0.422	0.364	7.02539e-24	1.29387e-60	1.46873	0.851	0.507	4.50162e-56	4.0043e-302	1.42757	0.89	0.607	1.39318e-297	3.23564e-08	1.60172e-301
Clec4a3	7.36752e-74	1.60225	0.908	0.312	2.56331e-69	1.31779e-91	1.37806	0.43	0.212	4.58486e-87	5.58539e-35	1.07376	0.851	0.534	1.94327e-30	3.74973e-297	1.32508	0.851	0.626	1.30461e-292	5.58539e-35	1.49989e-296
Rnf149	1.18934e-35	1.10286	0.797	0.394	4.13796e-31	6.26778e-89	1.35279	0.503	0.252	2.18069e-84	1.34384e-13	0.52815	0.6	0.337	4.67549e-09	1.17161e-292	1.22409	0.794	0.589	4.07627e-288	1.34384e-13	4.68645e-292
Ikbkb	5.54683e-15	0.64357	0.732	0.466	1.92985e-10	2.30874e-58	1.00072	0.323	0.223	8.03257e-54	0.0261249	0.278908	0.566	0.527	1	1.2261e-290	1.1161	0.596	0.396	4.26586e-286	0.0261249	4.90441e-290
Tyrobp	2.96987e-72	1.44942	0.993	0.691	1.03328e-67	2.13435e-225	1.2258	0.939	0.793	7.42582e-221	2.87695e-32	0.840846	0.926	0.761	1.00095e-27	8.83999e-288	1.0377	0.996	0.955	3.07561e-283	2.87695e-32	3.53599e-287
Gpx1	6.73483e-77	1.41888	1	0.838	2.34318e-72	1.59785e-56	0.74507	0.828	0.747	5.55925e-52	9.70851e-37	1.14765	0.909	0.776	3.37779e-32	6.91781e-286	1.04654	0.996	0.967	2.40684e-281	9.70851e-37	2.76712e-285
Plaur	5.37279e-52	1.30874	0.83	0.256	1.8693e-47	3.76576e-56	0.956988	0.499	0.346	1.31018e-51	1.08389e-35	1.1487	0.674	0.325	3.77106e-31	1.28261e-279	1.52867	0.791	0.386	4.46247e-275	1.08389e-35	5.13046e-279
Tkt	2.56579e-20	0.719952	0.882	0.596	8.9269e-16	2.76862e-31	0.51011	0.33	0.32	9.63257e-27	4.56338e-07	0.403818	0.737	0.633	0.0158769	7.41333e-277	1.10278	0.89	0.746	2.57924e-272	4.56338e-07	2.96533e-276
Slc16a3	1.43793e-13	0.264546	0.516	0.227	5.00284e-09	1.46112e-39	0.979614	0.27	0.107	5.08352e-35	8.50348e-13	0.645146	0.674	0.429	2.95853e-08	2.1106e-273	1.64535	0.621	0.174	7.3432e-269	8.50348e-13	8.44241e-273
Msn	1.38705e-05	0.339752	0.948	0.838	0.482583	9.03262e-57	0.79132	0.489	0.427	3.14263e-52	3.15896e-16	0.534173	0.943	0.903	1.09906e-11	7.73637e-273	1.1641	0.937	0.88	2.69164e-268	1.38705e-05	3.09455e-272
Pmaip1	1.9615e-20	0.701098	0.497	0.164	6.82446e-16	4.74211e-23	0.72392	0.216	0.153	1.64988e-18	7.66148e-10	0.485524	0.457	0.242	2.66558e-05	7.45379e-272	1.51815	0.558	0.174	2.59332e-267	7.66148e-10	2.98152e-271
Cdk2ap2	1.52805e-09	0.553524	0.83	0.693	5.3164e-05	3.5434e-59	1.00663	0.438	0.307	1.23282e-54	4.35605e-23	0.886942	0.737	0.512	1.51556e-18	3.11352e-269	1.46611	0.735	0.487	1.08326e-264	1.52805e-09	1.24541e-268
Ly6c2	3.80388e-90	3.03669	0.797	0.136	1.32344e-85	7.41648e-147	2.50261	0.347	0.044	2.58034e-142	5.19575e-174	3.99109	0.886	0.111	1.8077e-169	7.04887e-268	2.23711	0.527	0.052	2.45244e-263	3.80388e-90	2.81955e-267
Atp1a1	0.000468173	0.368779	0.673	0.523	1	1.00413e-36	0.705946	0.29	0.248	3.49358e-32	7.76208e-18	0.757179	0.811	0.658	2.70058e-13	1.5016e-266	1.04247	0.715	0.674	5.22438e-262	0.000468173	6.00641e-266
Sirpb1c	3.84732e-55	0.973452	0.471	0.039	1.33856e-50	5.79203e-75	1.41675	0.247	0.05	2.01516e-70	5.81647e-17	0.647765	0.274	0.073	2.02367e-12	1.003e-262	1.32867	0.475	0.042	3.48963e-258	5.81647e-17	4.01199e-262
Fam49a	5.10526e-29	0.945081	0.484	0.166	1.77622e-24	5.64224e-51	1.10975	0.204	0.076	1.96305e-46	4.0107e-16	0.707384	0.577	0.294	1.3954e-11	1.37136e-257	1.12709	0.485	0.237	4.77124e-253	4.0107e-16	5.48544e-257
Kdm7a	2.18865e-23	0.84464	0.784	0.444	7.61476e-19	3.77279e-19	0.535434	0.231	0.195	1.31263e-14	8.31524e-29	0.902247	0.829	0.548	2.89304e-24	1.46588e-252	1.2323	0.697	0.403	5.10009e-248	3.77279e-19	5.86353e-252
Fmnl1	9.6111e-14	0.593352	0.745	0.465	3.3439e-09	3.19716e-31	0.779159	0.268	0.184	1.11235e-26	8.05306e-10	0.487725	0.571	0.36	2.80182e-05	5.50285e-249	1.07887	0.605	0.375	1.91455e-244	8.05306e-10	2.20114e-248
Prkcd	5.42582e-32	0.961723	0.895	0.491	1.88775e-27	9.19674e-33	0.740654	0.319	0.254	3.19973e-28	7.77254e-17	0.760537	0.829	0.648	2.70422e-12	1.79454e-245	1.03249	0.723	0.611	6.24355e-241	7.77254e-17	7.17814e-245
Itgam	4.33253e-22	0.592417	0.817	0.422	1.50737e-17	8.04477e-15	0.252567	0.239	0.263	2.79894e-10	2.79357e-17	0.581798	0.954	0.77	9.71937e-13	4.88176e-241	1.16823	0.737	0.501	1.69846e-236	8.04477e-15	1.9527e-240
Klf13	1.19482e-17	0.651244	0.81	0.595	4.15703e-13	4.64022e-42	0.892273	0.327	0.226	1.61442e-37	2.02982e-08	0.463806	0.737	0.635	0.000706215	9.48365e-238	1.05797	0.688	0.52	3.29955e-233	2.02982e-08	3.79346e-237
Lst1	5.40658e-101	2.02797	0.967	0.368	1.88106e-96	1.73669e-231	2.14848	0.697	0.242	6.04228e-227	2.88656e-107	2.01724	0.891	0.388	1.00429e-102	1.34559e-201	1.05873	0.979	0.887	4.68159e-197	5.40658e-101	6.94675e-231
Gm9733	7.34277e-66	0.89107	0.399	0.013	2.5547e-61	1.17087e-122	1.6388	0.219	0.01	4.07369e-118	5.35616e-54	0.834416	0.297	0.01	1.86351e-49	5.54095e-228	1.18601	0.403	0.026	1.92781e-223	5.35616e-54	2.21638e-227
Ctss	3.46393e-36	0.941955	0.987	0.677	1.20517e-31	6.60261e-20	0.302813	0.836	0.772	2.29718e-15	3.57466e-13	0.394204	0.971	0.824	1.2437e-08	2.44761e-216	1.11474	0.983	0.828	8.51573e-212	3.57466e-13	9.79045e-216
Sema4d	5.13227e-23	0.770186	0.654	0.264	1.78562e-18	4.3876e-45	1.12489	0.212	0.063	1.52653e-40	1.62737e-07	0.439678	0.463	0.267	0.00566195	2.73398e-200	1.12405	0.455	0.141	9.51205e-196	1.62737e-07	1.09359e-199
Ms4a4c	7.36146e-106	2.29135	0.856	0.144	2.5612e-101	1.25268e-90	1.67972	0.352	0.108	4.35832e-86	9.51973e-83	1.65777	0.971	0.605	3.3121e-78	1.20439e-196	1.40615	0.427	0.071	4.19031e-192	9.51973e-83	4.81755e-196
Lyn	3.14192e-42	1.04652	0.895	0.505	1.09314e-37	1.50428e-41	0.889026	0.308	0.205	5.23368e-37	7.36738e-05	0.297353	0.846	0.772	1	1.05575e-180	0.914226	0.879	0.786	3.67315e-176	7.36738e-05	4.22299e-180
Rap1b	2.98397e-14	0.636386	0.948	0.845	1.03818e-09	1.90504e-105	1.14609	0.622	0.466	6.62803e-101	1.22468e-06	0.303848	0.891	0.874	0.0426089	1.79615e-179	0.93658	0.965	0.934	6.24917e-175	1.22468e-06	7.1846e-179
Fis1	5.79368e-13	0.510537	0.869	0.653	2.01574e-08	3.69961e-28	0.539672	0.271	0.25	1.28717e-23	1.98669e-12	0.484458	0.646	0.55	6.9121e-08	8.69866e-178	0.798114	0.785	0.741	3.02644e-173	1.98669e-12	3.47946e-177
Cyba	5.50072e-36	0.808962	0.987	0.922	1.91381e-31	2.25194e-26	0.40475	0.829	0.802	7.83494e-22	1.6587e-13	0.466343	0.897	0.881	5.77094e-09	1.61216e-175	0.795813	0.987	0.967	5.60904e-171	1.6587e-13	6.44865e-175
Ptpn6	1.01003e-15	0.662822	0.81	0.569	3.51409e-11	7.26973e-24	0.653815	0.251	0.181	2.52928e-19	9.60661e-48	1.11181	0.857	0.597	3.34233e-43	2.65892e-166	0.811146	0.76	0.7	9.2509e-162	1.01003e-15	1.06357e-165
Nupr1	6.99932e-23	0.751304	0.51	0.159	2.4352e-18	7.99632e-48	1.18621	0.278	0.116	2.78208e-43	2.90457e-35	1.21256	0.691	0.35	1.01056e-30	2.4262e-164	1.04434	0.558	0.318	8.44123e-160	6.99932e-23	9.7048e-164
Fcer1g	9.76911e-52	1.20707	1	0.704	3.39887e-47	1.35509e-153	0.975736	0.921	0.824	4.71462e-149	3.82552e-21	0.775205	0.96	0.838	1.33098e-16	8.53295e-42	0.366192	0.992	0.962	2.96878e-37	3.82552e-21	5.42035e-153
Ms4a6c	3.27417e-119	2.21755	0.98	0.433	1.13915e-114	5.90175e-152	1.63153	0.619	0.307	2.05334e-147	9.64379e-13	0.364839	0.954	0.756	3.35527e-08	8.15953e-42	0.518211	0.794	0.773	2.83886e-37	9.64379e-13	2.3607e-151
Klf3	2.48563e-23	0.877861	0.778	0.414	8.64799e-19	1.14502e-17	0.56154	0.203	0.163	3.98375e-13	0.0172057	0.265495	0.657	0.583	1	2.51447e-150	0.804919	0.639	0.567	8.74833e-146	0.0172057	1.00579e-149
Ifi27l2a	5.52767e-27	1.25411	0.902	0.618	1.92319e-22	9.34634e-80	0.924535	0.724	0.67	3.25178e-75	2.85937e-13	0.677845	0.914	0.838	9.94832e-09	2.09161e-149	1.3669	0.83	0.637	7.27714e-145	2.85937e-13	8.36646e-149
B2m	3.54254e-08	0.2826	1	0.99	0.00123252	6.26895e-147	0.838935	0.987	0.95	2.18109e-142	2.35265e-14	0.383671	1	0.997	8.18534e-10	2.25439e-59	0.522422	0.997	0.985	7.84347e-55	3.54254e-08	2.50758e-146
Rilpl2	1.23508e-24	0.824285	0.634	0.251	4.2971e-20	4.90098e-23	0.756435	0.2	0.116	1.70515e-18	2.18885e-09	0.52807	0.503	0.311	7.61544e-05	3.08688e-139	0.914123	0.636	0.454	1.07399e-134	2.18885e-09	1.23475e-138
Ifi204	6.44757e-41	1.23969	0.804	0.285	2.24324e-36	5.99626e-35	0.997253	0.263	0.126	2.08622e-30	1.22932e-13	0.597177	0.891	0.715	4.27707e-09	1.74079e-137	0.834798	0.673	0.577	6.05657e-133	1.22932e-13	6.96318e-137
Ccdc12	3.90294e-08	0.455107	0.791	0.622	0.00135791	2.86138e-26	0.43554	0.288	0.288	9.95532e-22	0.000656485	0.280351	0.606	0.478	1	3.22785e-132	0.648267	0.656	0.634	1.12303e-127	0.000656485	1.29114e-131
Acer3	1.54715e-14	0.543514	0.601	0.29	5.38285e-10	4.14129e-18	0.353413	0.204	0.204	1.44084e-13	4.07195e-17	0.746398	0.72	0.447	1.41671e-12	1.69007e-121	0.639138	0.511	0.456	5.88008e-117	1.54715e-14	6.76026e-121
Pld4	9.12706e-49	1.18482	0.928	0.415	3.17549e-44	1.37745e-23	0.283819	0.311	0.339	4.79244e-19	1.09654e-13	0.70234	0.583	0.329	3.81507e-09	2.65026e-120	0.784951	0.836	0.726	9.22079e-116	1.09654e-13	1.0601e-119
Clec4a1	1.66191e-38	1.01601	0.863	0.365	5.78211e-34	1.35941e-71	1.21891	0.385	0.203	4.72966e-67	6.10902e-14	0.526996	0.909	0.674	2.12545e-09	3.3602e-113	0.781983	0.775	0.673	1.16908e-108	6.10902e-14	1.34408e-112
Lrp1	1.89088e-20	0.686735	0.673	0.296	6.57876e-16	1.53171e-18	0.398259	0.206	0.193	5.32914e-14	5.70215e-28	0.950601	0.646	0.324	1.98389e-23	4.47888e-113	0.799851	0.702	0.568	1.55829e-108	1.53171e-18	1.79155e-112
Dazap2	1.16059e-05	0.250484	0.902	0.751	0.403794	1.58074e-22	0.366271	0.364	0.373	5.4997e-18	0.00406019	0.275146	0.846	0.782	1	1.23446e-112	0.612839	0.791	0.794	4.29493e-108	0.00406019	4.93784e-112
Il1b	1.42176e-25	0.853118	0.614	0.211	4.94659e-21	2.40987e-50	0.813735	0.718	0.518	8.3844e-46	4.67252e-29	0.890928	0.789	0.384	1.62566e-24	5.10843e-109	0.966548	0.652	0.275	1.77732e-104	1.42176e-25	2.04337e-108
Arl6ip5	1.15779e-06	0.267923	0.784	0.583	0.0402819	1.32756e-24	0.581602	0.244	0.206	4.61885e-20	0.000711035	0.28344	0.514	0.424	1	2.86124e-107	0.449096	0.57	0.627	9.95481e-103	0.000711035	1.14449e-106
Rap1a	2.46647e-20	0.70408	0.908	0.729	8.58133e-16	4.63774e-85	1.11239	0.499	0.334	1.61356e-80	1.50442e-10	0.479631	0.811	0.683	5.23419e-06	6.03978e-105	0.602667	0.879	0.9	2.10136e-100	1.50442e-10	2.41591e-104
Dusp3	7.65231e-10	0.457623	0.556	0.303	2.66239e-05	2.84446e-29	0.637159	0.231	0.205	9.89646e-25	0.00203985	0.291172	0.371	0.289	1	6.71614e-105	0.479063	0.437	0.466	2.33668e-100	0.00203985	2.68646e-104
Metrnl	4.95452e-15	0.718181	0.719	0.405	1.72378e-10	1.00733e-27	0.593669	0.363	0.308	3.50471e-23	5.56088e-17	0.740483	0.703	0.484	1.93474e-12	8.15696e-105	0.746707	0.688	0.61	2.83797e-100	4.95452e-15	3.26279e-104
Mtpn	8.13631e-10	0.49182	0.758	0.57	2.83078e-05	4.29607e-21	0.474026	0.268	0.245	1.49469e-16	0.000351872	0.27705	0.771	0.681	1	1.0849e-101	0.493989	0.663	0.694	3.77458e-97	0.000351872	4.3396e-101
Cxcr4	4.72772e-06	0.539174	0.588	0.39	0.164487	4.48831e-28	0.745783	0.358	0.283	1.56157e-23	1.80892e-18	0.838005	0.617	0.304	6.29358e-14	7.25733e-101	0.934004	0.449	0.194	2.52497e-96	4.72772e-06	2.90293e-100
Atox1	2.49741e-11	0.481715	0.895	0.708	8.689e-07	8.54521e-63	0.735144	0.708	0.639	2.97305e-58	6.11551e-13	0.481358	0.914	0.727	2.12771e-08	2.94488e-93	0.61511	0.899	0.908	1.02458e-88	2.49741e-11	1.17795e-92
Rhog	1.03357e-08	0.443979	0.791	0.586	0.0003596	4.18093e-19	0.572108	0.235	0.171	1.45463e-14	2.10988e-16	0.609094	0.84	0.647	7.34071e-12	9.12878e-91	0.502411	0.74	0.767	3.17608e-86	1.03357e-08	3.65151e-90
Kdm6b	2.93903e-13	0.561253	0.765	0.479	1.02255e-08	7.38197e-12	0.2782	0.515	0.514	2.56834e-07	6.05435e-08	0.524925	0.703	0.551	0.00210643	1.06903e-87	0.617541	0.577	0.537	3.71938e-83	6.05435e-08	4.27613e-87
Spi1	1.28828e-25	0.749779	0.935	0.567	4.48217e-21	1.59237e-71	1.06833	0.469	0.31	5.54016e-67	4.40391e-16	0.613904	0.909	0.734	1.53221e-11	3.14719e-85	0.656906	0.914	0.845	1.09497e-80	4.40391e-16	1.25888e-84
Cmpk1	3.59818e-09	0.48307	0.771	0.576	0.000125188	3.70546e-30	0.566061	0.314	0.28	1.2892e-25	0.0018045	0.275908	0.714	0.608	1	3.18821e-84	0.442658	0.716	0.757	1.10924e-79	0.0018045	1.27528e-83
Tln1	2.19263e-11	0.510504	0.889	0.723	7.62861e-07	4.88254e-27	0.473265	0.278	0.268	1.69873e-22	1.39363e-28	0.710841	0.857	0.715	4.8487e-24	1.46865e-81	0.545958	0.808	0.819	5.10971e-77	2.19263e-11	5.87458e-81
Atp1b3	2.63335e-05	0.321297	0.693	0.528	0.916196	2.97646e-21	0.442067	0.346	0.336	1.03557e-16	6.57941e-05	0.294236	0.783	0.685	1	2.75568e-78	0.303706	0.593	0.699	9.58757e-74	6.57941e-05	1.10227e-77
Slfn2	4.76392e-27	0.878489	0.889	0.647	1.65746e-22	5.87089e-50	0.801156	0.517	0.405	2.0426e-45	2.85776e-06	0.377908	0.914	0.852	0.0994273	4.3391e-78	0.653449	0.846	0.783	1.50966e-73	2.85776e-06	1.73564e-77
Tnfrsf1a	1.84296e-15	0.591152	0.693	0.382	6.41201e-11	3.38664e-25	0.717424	0.218	0.136	1.17828e-20	4.75233e-09	0.429154	0.651	0.436	0.000165343	4.60322e-73	0.439379	0.603	0.612	1.60155e-68	4.75233e-09	1.84129e-72
Pirb	5.43277e-31	0.958806	0.824	0.413	1.89017e-26	1.47618e-18	0.445109	0.206	0.188	5.13593e-14	1.77474e-08	0.289071	0.926	0.763	0.000617466	3.75271e-72	0.520536	0.52	0.465	1.30564e-67	1.77474e-08	1.50108e-71
Sec61g	1.38387e-13	0.527775	0.908	0.763	4.81475e-09	2.71166e-35	0.452717	0.652	0.643	9.43439e-31	1.00498e-69	1.17303	0.903	0.781	3.49654e-65	3.26201e-38	0.287747	0.881	0.923	1.13492e-33	1.38387e-13	4.01993e-69
Slc15a3	3.1523e-07	0.438998	0.471	0.272	0.0109675	1.05247e-13	0.336993	0.218	0.217	3.66177e-09	1.75443e-09	0.554908	0.789	0.591	6.10402e-05	2.30658e-66	0.427364	0.361	0.355	8.02507e-62	3.1523e-07	9.22634e-66
Tgfb1	4.36144e-14	0.607567	0.882	0.642	1.51743e-09	5.17709e-37	0.691647	0.344	0.285	1.80121e-32	1.16035e-23	0.80096	0.76	0.573	4.0371e-19	1.36208e-65	0.329403	0.695	0.792	4.73897e-61	4.36144e-14	5.44834e-65
Atp6v1e1	1.03196e-13	0.558388	0.791	0.527	3.5904e-09	9.222e-21	0.491543	0.21	0.178	3.20852e-16	8.54518e-13	0.559773	0.766	0.568	2.97304e-08	4.90282e-63	0.419883	0.778	0.823	1.70579e-58	8.54518e-13	1.96113e-62
Atp5l	2.21346e-10	0.416213	0.954	0.867	7.70107e-06	3.36809e-27	0.331337	0.701	0.725	1.17182e-22	3.92275e-05	0.263358	0.903	0.853	1	8.82602e-61	0.401675	0.91	0.94	3.07075e-56	3.92275e-05	3.53041e-60
Ndufa3	0.000253031	0.264073	0.758	0.622	1	1.48541e-23	0.417528	0.438	0.43	5.16806e-19	9.94108e-16	0.564004	0.8	0.607	3.4587e-11	9.8153e-60	0.254981	0.743	0.845	3.41494e-55	0.000253031	3.92612e-59
Arpc4	6.00572e-09	0.41058	0.902	0.771	0.000208951	1.4524e-22	0.26249	0.348	0.388	5.0532e-18	5.81072e-05	0.361052	0.846	0.751	1	1.27195e-53	0.301017	0.767	0.837	4.42538e-49	5.81072e-05	5.08782e-53
Serf2	6.04492e-15	0.414437	0.987	0.953	2.10315e-10	6.82625e-31	0.393266	0.828	0.812	2.37499e-26	5.04101e-12	0.436018	0.903	0.842	1.75387e-07	2.96978e-38	0.320481	0.976	0.981	1.03324e-33	5.04101e-12	1.18791e-37
Dusp2	3.24187e-05	0.367666	0.477	0.3	1	1.79071e-18	0.739136	0.228	0.128	6.23022e-14	1.47574e-33	1.284	0.811	0.451	5.13441e-29	8.47419e-21	0.526995	0.524	0.433	2.94834e-16	3.24187e-05	5.90297e-33
Zeb2	1.08281e-30	0.608785	0.974	0.565	3.76733e-26	8.77555e-26	0.452016	0.454	0.451	3.05319e-21	8.8617e-12	0.397534	0.949	0.755	3.08316e-07	2.35015e-33	0.492086	0.906	0.873	8.17665e-29	8.8617e-12	9.40061e-33
Arpc2	6.02482e-20	0.50587	0.993	0.951	2.09616e-15	5.43775e-24	0.353434	0.642	0.654	1.8919e-19	2.73459e-07	0.282165	0.937	0.919	0.00951417	7.19285e-25	0.254377	0.979	0.978	2.50254e-20	2.73459e-07	2.87714e-24

## Sheet: C8
	Exp_1_(S005)_p_val	S005_avg_log2FC	S005_pct.1	S005_pct.2	S005_p_val_adj	Exp_2_(SP024)_p_val	SP024_avg_log2FC	SP024_pct.1	SP024_pct.2	SP024_p_val_adj	Exp_3_(LPS)_p_val	LPS_avg_log2FC	LPS_pct.1	LPS_pct.2	LPS_p_val_adj	Exp_4_(S006)_p_val	S006_avg_log2FC	S006_pct.1	S006_pct.2	S006_p_val_adj	max_pval	minimump_p_val
Cd300lf	0	2.08541	0.723	0.034	0	1.55231e-111	2.55443	0.339	0.017	5.4008e-107	0	3.52728	0.97	0.113	0	0	2.17509	0.696	0.073	0	1.55231e-111	0
Clec4e	0	2.98738	0.759	0.046	0	2.75751e-128	2.66405	0.636	0.153	9.59394e-124	3.53135e-42	0.995484	0.859	0.515	1.22863e-37	3.22877e-189	2.24526	0.473	0.08	1.12336e-184	3.53135e-42	0
Csf3r	0	2.93915	0.768	0.06	0	6.29934e-208	3.2921	0.579	0.026	2.19167e-203	3.15523e-235	2.36576	0.907	0.323	1.09777e-230	0	2.53249	0.68	0.091	0	6.29934e-208	0
Cxcr2	0	3.02766	0.837	0.014	0	6.72314e-87	2.06339	0.237	0.005	2.33911e-82	0	3.49165	0.844	0.008	0	0	2.43915	0.704	0.01	0	6.72314e-87	0
Dgat1	0	2.34878	0.808	0.099	0	8.07486e-51	1.88931	0.25	0.042	2.8094e-46	8.53319e-94	1.59732	0.444	0.082	2.96887e-89	2.88458e-115	0.817941	0.321	0.099	1.0036e-110	8.07486e-51	0
G0s2	0	5.34261	0.944	0.031	0	0	5.78495	0.858	0.054	0	0	5.28692	0.881	0.022	0	0	5.0215	0.826	0.048	0	0	0
Gda	0	2.34084	0.947	0.26	0	1.1459e-13	0.645977	0.351	0.293	3.9868e-09	8.2568e-35	0.842083	0.911	0.703	2.87271e-30	0	2.12223	0.686	0.092	0	1.1459e-13	0
Grina	0	2.49743	0.897	0.336	0	1.15296e-171	2.95989	0.56	0.073	4.01139e-167	0	2.58058	0.941	0.424	0	0	2.01167	0.825	0.494	0	1.15296e-171	0
Gsr	0	2.84973	0.967	0.192	0	3.43146e-97	2.35831	0.513	0.096	1.19387e-92	6.20366e-240	2.29924	0.952	0.403	2.15838e-235	0	2.61914	0.924	0.35	0	3.43146e-97	0
Hdc	0	3.28216	0.975	0.033	0	1.25953e-305	4.13629	0.769	0.027	4.38215e-301	0	3.79526	0.956	0.079	0	3.2404e-158	0.7744	0.67	0.171	1.1274e-153	3.2404e-158	0
Hp	0	3.89979	0.966	0.047	0	1.17874e-123	2.84228	0.497	0.044	4.10107e-119	0	3.99082	0.978	0.122	0	0	3.49483	0.933	0.089	0	1.17874e-123	0
Ifitm6	0	3.92234	0.766	0.14	0	9.6197e-11	0.809232	0.225	0.142	3.34689e-06	0	3.74055	0.9	0.138	0	1.35707e-187	2.32746	0.526	0.126	4.72151e-183	9.6197e-11	0
Il1f9	0	1.90121	0.514	0.002	0	5.23475e-80	1.88515	0.212	0.003	1.82127e-75	0	3.3617	0.867	0.006	0	2.19984e-197	0.994594	0.256	0.001	7.6537e-193	5.23475e-80	0
Lrg1	0	2.81439	0.808	0.004	0	6.3219e-96	2.53573	0.244	0.003	2.19952e-91	0	3.84681	0.841	0.044	0	0	1.93118	0.473	0.005	0	6.3219e-96	0
Mcemp1	0	2.99973	0.94	0.103	0	7.80144e-79	2.21206	0.373	0.054	2.71428e-74	1.23022e-321	2.91659	0.822	0.106	4.28019e-317	0	2.59793	0.816	0.079	0	7.80144e-79	0
Mgst1	0	2.44377	0.806	0.102	0	3.59288e-18	1.17304	0.206	0.066	1.25004e-13	3.31198e-179	1.75667	0.574	0.031	1.1523e-174	9.35457e-240	2.02494	0.613	0.118	3.25464e-235	3.59288e-18	0
Mmp9	0	4.24954	0.902	0.05	0	4.54318e-134	2.70316	0.373	0.01	1.58066e-129	0	3.83448	0.819	0.049	1.28459e-306	0	3.51986	0.864	0.02	0	4.54318e-134	0
Msrb1	0	3.36004	0.993	0.375	0	3.57817e-225	3.19677	0.794	0.204	1.24492e-220	0	3.68724	0.981	0.427	0	0	3.07342	0.979	0.461	0	3.57817e-225	0
Mxd1	0	3.3801	0.969	0.222	0	1.23942e-184	3.20794	0.63	0.08	4.31218e-180	0	3.99493	0.981	0.233	0	0	2.25043	0.711	0.196	0	1.23942e-184	0
Ncf1	0	1.89266	0.897	0.441	0	1.03454e-29	1.02199	0.263	0.195	3.59936e-25	7.0184e-117	1.50385	0.922	0.633	2.44184e-112	3.56083e-319	1.38944	0.711	0.56	1.23888e-314	1.03454e-29	0
Ndel1	0	2.21803	0.841	0.349	0	2.83771e-45	1.53782	0.323	0.144	9.87295e-41	5.40707e-199	1.7777	0.785	0.418	1.88123e-194	0	1.48272	0.651	0.465	5.21186e-304	2.83771e-45	0
Pglyrp1	0	4.28149	0.966	0.111	0	4.15028e-148	2.98488	0.589	0.049	1.44396e-143	0	4.23943	0.922	0.055	0	0	4.14289	0.959	0.1	0	4.15028e-148	0
Plaur	0	2.34555	0.85	0.217	0	9.13052e-106	2.03507	0.658	0.348	3.17669e-101	5.10568e-243	2.51374	0.819	0.316	1.77637e-238	0	2.37945	0.857	0.387	0	9.13052e-106	0
Prdx5	0	2.60892	0.967	0.641	0	4.28374e-63	1.4385	0.579	0.38	1.4904e-58	7.95972e-164	1.97397	0.967	0.721	2.76935e-159	0	1.87547	0.921	0.808	0	4.28374e-63	0
Retnlg	0	7.23222	0.893	0.035	0	1.93278e-201	4.74471	0.525	0.022	6.72453e-197	0	5.91203	0.881	0.016	0	0	6.52352	0.801	0.04	0	1.93278e-201	0
S100a8	0	8.88014	0.996	0.206	0	0	7.13009	0.956	0.198	0	0	8.53322	0.981	0.193	0	0	7.57785	0.991	0.317	0	0	0
S100a9	0	9.04331	0.995	0.28	0	0	6.8665	0.965	0.181	0	0	8.68953	0.996	0.214	0	0	8.43552	0.99	0.278	0	0	0
Slc16a3	0	2.69816	0.819	0.182	0	1.47363e-147	2.90323	0.516	0.106	5.12706e-143	5.27314e-113	1.69642	0.874	0.42	1.83463e-108	7.55462e-228	1.77031	0.603	0.179	2.6284e-223	5.27314e-113	0
Slc7a11	0	2.92567	0.786	0.051	0	8.32964e-150	3.04159	0.585	0.08	2.89805e-145	0	3.62313	0.907	0.107	0	0	3.2184	0.835	0.068	0	8.32964e-150	0
Slfn4	0	1.994	0.589	0.012	0	1.45673e-64	2.13204	0.244	0.017	5.06826e-60	0	4.12583	1	0.266	0	6.64333e-145	0.906769	0.265	0.011	2.31135e-140	1.45673e-64	0
Slpi	0	4.30406	0.906	0.037	0	1.67835e-316	4.84562	0.804	0.045	0	1.04825e-270	3.25445	0.844	0.044	3.64708e-266	0	4.51697	0.907	0.027	0	1.04825e-270	0
Sorl1	0	2.09974	0.915	0.258	0	1.1764e-77	2.13464	0.358	0.048	4.09294e-73	2.7131e-79	1.31948	0.696	0.203	9.43943e-75	3.85578e-248	1.72613	0.622	0.104	1.3415e-243	1.1764e-77	0
Taldo1	0	1.87853	0.982	0.715	0	5.90677e-70	1.6204	0.475	0.298	2.05508e-65	4.80086e-68	1.16593	0.785	0.534	1.67032e-63	0	1.56537	0.928	0.849	0	4.80086e-68	0
Trem1	0	2.33922	0.707	0.012	0	5.17467e-194	3.41278	0.563	0.03	1.80037e-189	0	3.50955	0.941	0.03	0	0	2.3379	0.643	0.03	0	5.17467e-194	0
Txn1	0	1.73661	0.978	0.749	0	1.73887e-79	1.58113	0.582	0.413	6.04988e-75	6.98493e-108	1.36731	0.933	0.807	2.4302e-103	5.27392e-153	1.00064	0.875	0.851	1.8349e-148	1.73887e-79	0
Wfdc21	0	5.15963	0.888	0.015	0	1.62977e-125	3.22522	0.32	0.006	5.67029e-121	0	5.2181	0.974	0.053	0	0	4.25042	0.828	0.017	0	1.62977e-125	0
Sell	2.6168e-285	2.15229	0.768	0.085	9.10436e-281	9.17066e-53	1.94066	0.247	0.026	3.19065e-48	0	3.31994	0.956	0.172	0	3.17982e-278	1.7812	0.548	0.038	1.10632e-273	9.17066e-53	0
Clec4d	2.3012e-276	2.57429	0.529	0.027	8.00634e-272	4.69508e-255	3.74399	0.709	0.06	1.63351e-250	4.67372e-195	2.17452	0.948	0.404	1.62608e-190	0	2.82428	0.696	0.187	0	4.67372e-195	0
Thbs1	2.51655e-272	3.21643	0.612	0.04	8.75557e-268	1.28218e-125	3.12174	0.601	0.119	4.46096e-121	2.59934e-199	3.97411	0.663	0.061	9.04361e-195	0	3.16901	0.876	0.139	0	1.28218e-125	0
Il1r2	2.69045e-262	2.34574	0.739	0.115	9.36061e-258	6.16846e-244	3.96424	0.69	0.063	2.14613e-239	0	4.45783	0.981	0.111	0	0	2.02073	0.503	0.019	0	6.16846e-244	0
S100a11	1.03254e-238	1.75486	0.998	0.832	3.59242e-234	3.98399e-205	2.21473	0.943	0.676	1.38611e-200	1.13829e-77	1.29131	0.922	0.758	3.96034e-73	0	3.1708	0.995	0.764	0	1.13829e-77	0
Arg2	1.55768e-228	1.64118	0.406	0.006	5.41947e-224	3.13758e-78	2.10108	0.247	0.01	1.09163e-73	9.04363e-258	2.12877	0.67	0.008	3.14646e-253	0	2.04505	0.51	0.008	0	3.13758e-78	0
Trib1	1.53224e-184	1.50544	0.768	0.324	5.33096e-180	1.20142e-35	1.29532	0.326	0.177	4.17998e-31	6.02337e-217	2.10309	0.893	0.376	2.09565e-212	0	1.70349	0.715	0.416	0	1.20142e-35	0
Hcar2	8.04998e-168	2.11227	0.389	0.059	2.80075e-163	2.59145e-85	2.33561	0.275	0.021	9.01618e-81	2.03547e-279	2.69279	0.759	0.058	7.08181e-275	0	2.71671	0.515	0.03	0	2.59145e-85	0
Il1b	3.07204e-147	3.76097	0.571	0.189	1.06883e-142	1.05481e-220	2.78919	0.962	0.519	3.6699e-216	0	4.3167	0.948	0.373	0	0	4.41959	0.73	0.275	0	3.07204e-147	0
Tnfaip2	3.98573e-112	1.59328	0.601	0.195	1.38671e-107	1.37674e-80	2.24989	0.462	0.131	4.78995e-76	1.00119e-40	0.915641	0.837	0.46	3.48333e-36	0	2.48826	0.698	0.158	0	1.00119e-40	0
Srgn	1.86157e-93	1.6383	0.96	0.899	6.47679e-89	0	2.60231	0.987	0.709	0	2.96439e-323	2.46136	1	0.923	1.03137e-318	2.88766e-190	1.69936	0.962	0.889	1.00468e-185	1.86157e-93	0
Mcl1	1.44092e-63	1.17765	0.96	0.844	5.01324e-59	4.16141e-55	1.12042	0.693	0.584	1.44784e-50	2.56997e-189	1.52907	0.993	0.887	8.94145e-185	0	1.83367	0.986	0.926	0	4.16141e-55	0
Btg2	6.3752e-11	0.664705	0.933	0.865	2.21806e-06	3.69134e-62	1.40073	0.623	0.451	1.28429e-57	1.6415e-125	1.69652	0.978	0.657	5.7111e-121	0	1.98689	0.945	0.77	0	6.3752e-11	0
Osm	0	2.84204	0.737	0.112	0	1.6269e-63	2.19283	0.307	0.068	5.66032e-59	0	3.84217	0.804	0.084	2.35654e-305	3.35867e-297	2.35916	0.584	0.233	1.16855e-292	1.6269e-63	0
Cd52	3.69003e-92	0.856472	0.993	0.82	1.28383e-87	1.43235e-50	0.95675	0.927	0.789	4.98342e-46	6.40634e-15	0.268056	0.93	0.745	2.2289e-10	0	2.01179	0.997	0.629	0	6.40634e-15	0
Vasp	5.04664e-211	1.37704	0.918	0.58	1.75583e-206	1.5226e-40	1.45954	0.326	0.173	5.29743e-36	3.81833e-236	1.91719	0.985	0.685	1.32847e-231	0	1.37026	0.737	0.592	3.2074e-308	1.5226e-40	0
Nlrp3	5.30707e-107	1.39678	0.317	0.137	1.84644e-102	1.55106e-78	2.15234	0.424	0.138	5.39646e-74	1.75411e-45	1.38954	0.722	0.474	6.10291e-41	0	1.84238	0.534	0.322	4.50769e-306	1.75411e-45	0
Ccr1	1.38063e-304	2.38847	0.803	0.253	4.8035e-300	7.68567e-111	2.44632	0.437	0.101	2.674e-106	3.52744e-249	2.33753	0.919	0.363	1.22727e-244	1.9686e-148	1.30056	0.801	0.671	6.84915e-144	7.68567e-111	5.52253e-304
Rac2	3.94684e-161	1.17026	0.966	0.763	1.37319e-156	7.90718e-33	1.01965	0.38	0.295	2.75107e-28	1.08977e-209	1.85676	0.963	0.67	3.79153e-205	2.32026e-301	1.40352	0.955	0.899	8.07264e-297	7.90718e-33	9.28103e-301
Slfn1	5.24168e-229	1.85121	0.641	0.089	1.82368e-224	1.67567e-69	1.97791	0.253	0.018	5.82998e-65	2.62071e-92	1.42845	0.752	0.364	9.11799e-88	4.2326e-300	1.92614	0.574	0.052	1.47261e-295	1.67567e-69	1.69304e-299
Btg1	1.47254e-29	0.585704	0.982	0.898	5.12328e-25	7.8837e-73	1.27298	0.88	0.713	2.7429e-68	1.96931e-27	0.745972	0.952	0.803	6.85163e-23	4.77531e-298	2.03338	0.935	0.767	1.66143e-293	1.96931e-27	1.91012e-297
Adam8	4.33283e-297	2.00497	0.808	0.221	1.50748e-292	6.00896e-43	1.39926	0.316	0.16	2.09064e-38	8.60862e-98	1.58785	0.781	0.305	2.99511e-93	2.45178e-121	1.06493	0.381	0.144	8.53023e-117	6.00896e-43	1.73313e-296
Ncf2	1.07885e-281	1.71132	0.931	0.495	3.75353e-277	6.7388e-25	0.901418	0.275	0.219	2.34456e-20	1.75247e-98	1.26828	0.852	0.523	6.09718e-94	2.77275e-269	1.28261	0.857	0.735	9.64695e-265	6.7388e-25	4.31539e-281
Cd24a	3.92739e-265	1.95209	0.9	0.229	1.36642e-260	2.02846e-33	1.28668	0.263	0.153	7.05741e-29	4.42331e-93	1.6391	0.678	0.153	1.53896e-88	2.32963e-280	1.91644	0.682	0.077	8.10526e-276	2.02846e-33	9.31853e-280
Prr13	3.08152e-162	1.29324	0.913	0.75	1.07212e-157	1.36385e-30	0.991326	0.446	0.347	4.7451e-26	1.63967e-273	2.33809	0.922	0.49	5.70472e-269	5.77786e-251	1.27658	0.773	0.701	2.01023e-246	1.36385e-30	6.55866e-273
Ets2	5.02674e-242	1.8651	0.766	0.199	1.7489e-237	5.04794e-89	2.179	0.5	0.153	1.75628e-84	2.39048e-128	1.7593	0.874	0.45	8.31696e-124	5.23854e-270	1.40068	0.624	0.46	1.82259e-265	5.04794e-89	2.09541e-269
Cdk2ap2	7.33e-32	0.705888	0.788	0.688	2.55025e-27	3.98758e-66	1.65494	0.494	0.312	1.38736e-61	1.53094e-17	0.663296	0.593	0.515	5.32645e-13	5.42313e-269	1.8382	0.73	0.49	1.88681e-264	1.53094e-17	2.16925e-268
Lilr4b	1.29642e-254	2.02002	0.848	0.306	4.51051e-250	1.438e-34	1.13218	0.453	0.322	5.00309e-30	1.01762e-226	2.10662	0.97	0.543	3.54052e-222	2.74589e-109	0.985897	0.491	0.364	9.5535e-105	1.438e-34	5.18569e-254
Tmcc1	3.25328e-94	1.11335	0.812	0.477	1.13188e-89	5.38661e-16	0.776312	0.244	0.194	1.87411e-11	7.05895e-29	0.787974	0.737	0.516	2.45595e-24	1.59952e-254	1.38519	0.601	0.334	5.56503e-250	5.38661e-16	6.39806e-254
Cebpb	4.67325e-191	2.23822	0.973	0.584	1.62592e-186	1.60378e-254	2.50236	0.987	0.7	5.57987e-250	9.3369e-193	2.20666	1	0.818	3.24849e-188	9.62188e-213	1.85842	0.945	0.87	3.34765e-208	4.67325e-191	6.41511e-254
Hmgb2	4.73933e-253	1.71394	0.947	0.629	1.64891e-248	8.47911e-16	0.819146	0.386	0.276	2.95005e-11	9.5149e-52	1.05764	0.8	0.519	3.31042e-47	2.97258e-73	0.750052	0.948	0.874	1.03422e-68	8.47911e-16	1.89573e-252
Gpsm3	2.62369e-114	0.936745	0.85	0.65	9.12833e-110	3.02246e-18	0.791358	0.209	0.166	1.05157e-13	2.95328e-60	0.976258	0.696	0.424	1.02751e-55	6.59022e-251	1.26099	0.727	0.562	2.29287e-246	3.02246e-18	2.63609e-250
S100a6	5.31176e-48	1.0963	0.926	0.88	1.84807e-43	0.000113015	0.402991	0.899	0.866	1	3.32102e-75	1.53692	0.978	0.809	1.15545e-70	9.58654e-251	2.17726	0.955	0.625	3.33535e-246	0.000113015	3.83462e-250
Pilra	2.83674e-249	1.72237	0.737	0.14	9.8696e-245	1.72752e-41	1.31321	0.253	0.125	6.01039e-37	1.04157e-46	1.05907	0.719	0.364	3.62385e-42	1.18643e-241	1.6662	0.694	0.28	4.12782e-237	1.72752e-41	1.1347e-248
Tyrobp	2.44014e-183	1.48235	1	0.671	8.48974e-179	1.28823e-214	1.88866	0.984	0.799	4.48199e-210	5.80064e-92	1.26314	0.963	0.757	2.01816e-87	3.37692e-236	1.19294	1	0.956	1.1749e-231	5.80064e-92	1.35077e-235
Cxcl2	2.93081e-62	2.77826	0.498	0.27	1.01969e-57	1.40715e-134	2.59292	0.905	0.553	4.89576e-130	8.58851e-232	3.57447	0.996	0.661	2.98811e-227	1.05586e-81	2.08188	0.701	0.646	3.67354e-77	2.93081e-62	3.4354e-231
Litaf	3.16898e-160	1.38052	0.851	0.52	1.10255e-155	2.27097e-73	1.53718	0.519	0.316	7.90118e-69	8.04288e-231	1.96742	0.911	0.506	2.79828e-226	3.13124e-174	1.03892	0.761	0.724	1.08942e-169	2.27097e-73	3.21715e-230
Ptprc	6.08643e-55	0.780336	0.978	0.892	2.11759e-50	5.85912e-41	0.896201	0.623	0.569	2.0385e-36	1.3802e-36	0.732129	0.959	0.857	4.80199e-32	8.61338e-224	1.33103	0.924	0.84	2.99677e-219	1.3802e-36	3.44535e-223
Pim1	6.2609e-39	1.09534	0.761	0.633	2.17829e-34	1.57994e-24	0.893542	0.782	0.709	5.49692e-20	9.36163e-185	2.11775	0.974	0.675	3.2571e-180	1.78215e-223	1.78385	0.758	0.649	6.20046e-219	1.57994e-24	7.12861e-223
Ccrl2	4.48578e-15	0.643278	0.216	0.251	1.56069e-10	9.87942e-79	2.41821	0.392	0.131	3.43725e-74	1.01933e-78	2.26385	0.611	0.324	3.54645e-74	4.62007e-223	2.53533	0.423	0.259	1.60741e-218	4.48578e-15	1.84803e-222
Dennd4a	2.48338e-29	0.703806	0.725	0.543	8.64018e-25	8.75147e-19	0.909339	0.263	0.191	3.04481e-14	5.72398e-12	0.457118	0.741	0.593	1.99149e-07	2.74305e-217	1.44782	0.691	0.524	9.54363e-213	5.72398e-12	1.09722e-216
Lmnb1	1.56158e-185	1.62948	0.71	0.211	5.43306e-181	1.38737e-206	3.23678	0.611	0.089	4.82693e-202	3.75303e-217	2.1063	0.796	0.182	1.30575e-212	1.44961e-144	1.20673	0.591	0.411	5.04349e-140	1.44961e-144	1.50121e-216
Adipor1	1.41386e-214	1.51468	0.835	0.408	4.91908e-210	2.44113e-34	1.35157	0.307	0.144	8.49317e-30	8.22607e-81	1.18702	0.704	0.372	2.86201e-76	3.28534e-184	0.99221	0.672	0.59	1.14304e-179	2.44113e-34	5.65542e-214
H2-Q10	1.15513e-108	1.26934	0.264	0.057	4.01893e-104	1.11523e-82	2.16579	0.241	0.009	3.88009e-78	1.35934e-71	1.03782	0.337	0.046	4.7294e-67	1.94505e-214	1.54494	0.309	0.027	6.76721e-210	1.35934e-71	7.78019e-214
Rnf149	1.03162e-120	1.54947	0.596	0.385	3.58921e-116	1.52943e-103	2.15984	0.623	0.261	5.3212e-99	5.88112e-111	1.41682	0.726	0.329	2.04616e-106	1.28735e-210	1.26586	0.639	0.598	4.47895e-206	1.52943e-103	5.1494e-210
2310001H17Rik	2.32827e-150	1.34641	0.596	0.134	8.10052e-146	2.08499e-61	1.9533	0.307	0.055	7.25409e-57	4.20507e-62	1.02964	0.459	0.116	1.46303e-57	5.14699e-202	1.3308	0.378	0.114	1.79074e-197	2.08499e-61	2.0588e-201
Fosl2	5.06635e-51	0.98555	0.683	0.413	1.76268e-46	6.11846e-32	1.06572	0.541	0.416	2.12873e-27	2.04374e-75	1.39363	0.819	0.455	7.11057e-71	2.96098e-199	1.32414	0.658	0.511	1.03019e-194	6.11846e-32	1.18439e-198
Cd300ld	2.52493e-82	1.18732	0.442	0.224	8.78472e-78	4.54272e-91	2.25221	0.418	0.093	1.5805e-86	1.13091e-27	0.71981	0.374	0.189	3.93465e-23	3.68104e-199	1.34687	0.505	0.256	1.28071e-194	1.13091e-27	1.47242e-198
Myl12b	5.51522e-71	0.710805	0.953	0.845	1.91886e-66	1.18724e-29	0.838312	0.354	0.305	4.13065e-25	7.68757e-33	0.745298	0.726	0.564	2.67466e-28	3.05035e-198	1.05668	0.873	0.833	1.06128e-193	1.18724e-29	1.22014e-197
Cd33	1.96502e-110	1.19567	0.746	0.298	6.83668e-106	3.8284e-25	1.22937	0.218	0.095	1.33198e-20	8.1985e-83	1.40369	0.796	0.352	2.85242e-78	3.19048e-196	1.16261	0.746	0.612	1.11003e-191	3.8284e-25	1.27619e-195
Tpd52	2.84806e-119	1.44252	0.69	0.445	9.90897e-115	2.71878e-113	2.14425	0.585	0.229	9.45918e-109	3.03691e-162	1.65226	0.893	0.498	1.0566e-157	1.01923e-192	1.22507	0.82	0.732	3.54612e-188	2.71878e-113	4.07693e-192
Il1rn	2.94124e-123	1.3105	0.402	0.051	1.02332e-118	7.08756e-130	2.84828	0.582	0.177	2.4659e-125	6.38929e-145	2.25453	0.974	0.636	2.22296e-140	7.71502e-191	1.79917	0.368	0.036	2.68421e-186	2.94124e-123	3.08601e-190
Nr4a1	2.62395e-18	0.351972	0.672	0.475	9.12925e-14	4.05171e-15	0.823619	0.399	0.286	1.40967e-10	1.6765e-190	2.71248	0.937	0.45	5.83288e-186	5.55996e-129	1.48722	0.801	0.635	1.93442e-124	4.05171e-15	6.70601e-190
Lcp1	2.55474e-190	1.24413	0.986	0.877	8.88844e-186	5.91384e-52	1.25598	0.589	0.418	2.05754e-47	2.67562e-26	0.587856	0.967	0.885	9.30902e-22	1.82094e-125	0.811037	0.928	0.911	6.3354e-121	2.67562e-26	1.0219e-189
Zyx	1.58119e-59	0.865161	0.832	0.574	5.50128e-55	4.47848e-25	0.881319	0.323	0.266	1.55815e-20	1.93522e-72	1.16566	0.844	0.536	6.73301e-68	5.29545e-189	1.10656	0.758	0.688	1.84239e-184	4.47848e-25	2.11818e-188
Map1lc3b	2.84811e-52	0.837592	0.81	0.71	9.90913e-48	1.81359e-68	1.65072	0.449	0.253	6.30985e-64	6.25085e-107	1.31738	0.778	0.492	2.1748e-102	2.23617e-184	1.06644	0.82	0.833	7.78008e-180	2.84811e-52	8.94468e-184
Itgb2	1.46994e-129	1.04913	0.812	0.555	5.11423e-125	4.99574e-13	0.477982	0.247	0.254	1.73812e-08	2.8162e-62	1.10454	0.785	0.555	9.79812e-58	2.3049e-184	1.16185	0.684	0.497	8.0192e-180	4.99574e-13	9.21959e-184
Gmfg	7.14752e-184	1.22072	0.947	0.684	2.48676e-179	6.45281e-85	1.67879	0.598	0.379	2.24506e-80	1.73728e-80	1.12997	0.933	0.715	6.04434e-76	9.58373e-145	0.856086	0.907	0.889	3.33437e-140	1.73728e-80	2.85901e-183
Alox5ap	1.05273e-180	1.34671	0.982	0.587	3.66264e-176	3.21172e-27	0.607899	0.592	0.609	1.11742e-22	1.14116e-154	1.87595	0.926	0.605	3.97031e-150	6.267e-164	1.07866	0.981	0.872	2.18041e-159	3.21172e-27	4.2109e-180
Cyp4f18	1.76797e-82	1.16497	0.482	0.23	6.15114e-78	7.9196e-40	1.52614	0.32	0.158	2.75539e-35	1.64237e-09	0.485341	0.326	0.215	5.71415e-05	6.69174e-177	1.62892	0.531	0.119	2.32819e-172	1.64237e-09	2.6767e-176
Cd14	0.764378	0.307021	0.408	0.423	1	1.36129e-101	2.02044	0.835	0.585	4.73622e-97	2.85024e-176	2.35299	0.97	0.637	9.91656e-172	5.23555e-107	1.41692	0.574	0.648	1.82155e-102	0.764378	1.1401e-175
Lilrb4a	2.70341e-114	1.19863	0.567	0.191	9.4057e-110	1.68297e-22	0.73562	0.415	0.389	5.85539e-18	9.96796e-174	1.76019	0.993	0.67	3.46805e-169	1.85379e-88	0.726365	0.32	0.243	6.44971e-84	1.68297e-22	3.98718e-173
Stk17b	1.08744e-60	0.998344	0.911	0.755	3.78342e-56	8.05194e-27	1.08294	0.481	0.315	2.80143e-22	9.38298e-120	1.61876	0.907	0.559	3.26453e-115	1.82768e-171	1.1696	0.761	0.666	6.35886e-167	8.05194e-27	7.31072e-171
Dusp1	1.31736e-06	0.53897	0.815	0.728	0.0458334	7.4639e-48	1.06192	0.88	0.759	2.59684e-43	1.12054e-168	2.2792	0.996	0.907	3.89857e-164	3.04432e-168	1.6355	0.895	0.891	1.05918e-163	1.31736e-06	4.48215e-168
Lst1	2.2444e-168	1.71264	0.824	0.342	7.8087e-164	5.17835e-115	2.21185	0.715	0.266	1.80165e-110	1.2115e-89	1.60029	0.811	0.385	4.21505e-85	7.85676e-72	0.903503	0.923	0.891	2.73352e-67	7.85676e-72	8.97758e-168
Gpcpd1	7.90809e-52	0.827508	0.437	0.262	2.75138e-47	1.01833e-19	0.975751	0.32	0.205	3.54296e-15	4.2592e-159	1.68331	0.744	0.267	1.48186e-154	8.7764e-168	1.21581	0.529	0.339	3.05349e-163	1.01833e-19	3.51056e-167
Smox	4.8577e-12	0.359445	0.237	0.196	1.69009e-07	7.36647e-60	1.86842	0.297	0.063	2.56294e-55	1.26464e-166	1.79953	0.715	0.182	4.39994e-162	2.58415e-43	0.309616	0.206	0.212	8.99076e-39	4.8577e-12	5.05856e-166
Kdm6b	7.70423e-22	0.699483	0.632	0.473	2.68046e-17	1.74283e-07	0.36116	0.484	0.515	0.00606364	1.14807e-46	1.04212	0.781	0.546	3.99438e-42	3.21041e-166	1.07592	0.619	0.535	1.11697e-161	1.74283e-07	1.28416e-165
Cd44	7.93619e-13	0.433381	0.897	0.796	2.76116e-08	1.11036e-67	1.21222	0.832	0.669	3.86316e-63	1.83088e-39	0.78024	0.978	0.832	6.37e-35	3.73421e-165	1.25529	0.863	0.79	1.29921e-160	7.93619e-13	1.49368e-164
Snx20	8.38068e-24	0.598424	0.587	0.502	2.91581e-19	1.66028e-80	2.06727	0.37	0.127	5.77646e-76	3.1811e-88	1.20059	0.711	0.481	1.10677e-83	2.16166e-163	1.02441	0.552	0.494	7.52085e-159	8.38068e-24	8.64665e-163
Fgr	1.67887e-141	1.25874	0.611	0.188	5.84111e-137	3.23867e-21	1.01569	0.218	0.113	1.1268e-16	1.56752e-48	0.953686	0.807	0.524	5.45371e-44	3.40767e-162	1.4044	0.521	0.097	1.1856e-157	3.23867e-21	1.36307e-161
Slfn2	7.14173e-74	0.985065	0.875	0.633	2.48475e-69	1.22959e-17	0.514895	0.386	0.416	4.27799e-13	9.17378e-65	1.01359	0.967	0.85	3.19174e-60	2.10661e-160	1.24971	0.866	0.783	7.32931e-156	1.22959e-17	8.42644e-160
Plek	7.84758e-65	1.20818	0.697	0.451	2.73033e-60	2.5049e-118	1.93547	0.728	0.443	8.71506e-114	6.17648e-54	1.11808	0.915	0.696	2.14892e-49	4.94469e-159	1.28025	0.713	0.658	1.72036e-154	6.17648e-54	1.97788e-158
Cox17	1.30489e-17	0.447178	0.587	0.516	4.53997e-13	5.83336e-156	2.15251	0.737	0.434	2.02954e-151	5.2031e-06	0.278769	0.726	0.699	0.181026	1.00938e-105	0.569305	0.466	0.537	3.51185e-101	5.2031e-06	2.33335e-155
Cd9	2.33624e-154	1.07349	0.918	0.365	8.12826e-150	1.83656e-104	2.1336	0.718	0.364	6.38975e-100	2.06995e-145	2.10872	0.956	0.327	7.20178e-141	7.12156e-90	1.1364	0.704	0.442	2.47773e-85	7.12156e-90	9.34498e-154
Ifitm2	4.5414e-75	1.32291	0.855	0.516	1.58004e-70	2.74909e-153	2.02326	0.88	0.587	9.56464e-149	1.19864e-35	0.777584	0.985	0.81	4.1703e-31	8.66291e-17	0.315787	0.868	0.907	3.014e-12	8.66291e-17	1.09964e-152
Mrpl33	2.12541e-113	1.08571	0.864	0.629	7.39472e-109	2.61042e-88	1.5355	0.63	0.436	9.08217e-84	5.35572e-25	0.528631	0.667	0.637	1.86336e-20	1.58701e-152	0.895807	0.742	0.753	5.52154e-148	5.35572e-25	6.34805e-152
Ifitm1	1.89371e-77	2.29358	0.308	0.046	6.58861e-73	1.37333e-147	3.72261	0.446	0.039	4.77809e-143	1.91995e-137	2.72647	0.637	0.082	6.67989e-133	2.4683e-152	1.69334	0.448	0.063	8.5877e-148	1.89371e-77	9.87319e-152
Samsn1	1.32928e-83	1.04425	0.792	0.413	4.62484e-79	1.31982e-65	1.7367	0.541	0.251	4.59193e-61	1.37093e-151	1.88482	0.941	0.638	4.76976e-147	5.73782e-79	1.0957	0.663	0.419	1.9963e-74	1.31982e-65	5.48374e-151
Sat1	4.12845e-30	0.596935	0.926	0.791	1.43637e-25	4.71662e-23	0.584603	0.639	0.635	1.64101e-18	3.06306e-147	1.856	0.97	0.773	1.0657e-142	2.21636e-72	0.763336	0.907	0.904	7.71117e-68	4.71662e-23	1.22522e-146
Samhd1	1.63337e-21	0.54303	0.766	0.664	5.68284e-17	3.6849e-14	0.62291	0.326	0.292	1.28205e-09	3.41459e-18	0.49167	0.948	0.855	1.18801e-13	4.70815e-145	1.12823	0.794	0.686	1.63806e-140	3.6849e-14	1.88326e-144
Sgms2	9.57472e-132	0.979308	0.426	0.052	3.33124e-127	4.13308e-50	1.80476	0.222	0.03	1.43798e-45	2.7738e-121	1.34156	0.433	0.03	9.65059e-117	3.06519e-144	1.07796	0.325	0.049	1.06644e-139	4.13308e-50	1.22608e-143
Ube2b	1.86683e-32	0.591996	0.716	0.623	6.49509e-28	2.81482e-34	1.00474	0.335	0.265	9.79334e-30	4.98971e-53	0.918106	0.696	0.494	1.73602e-48	3.13525e-143	0.820578	0.713	0.72	1.09082e-138	1.86683e-32	1.2541e-142
Ptgs2	1.93851e-142	2.9663	0.395	0.046	6.74448e-138	1.40464e-134	3.07448	0.551	0.081	4.88701e-130	2.30171e-74	2.68063	0.607	0.192	8.00809e-70	8.9488e-142	2.5021	0.29	0.044	3.11346e-137	2.30171e-74	7.75406e-142
March7	1.51478e-32	0.656116	0.531	0.418	5.27022e-28	5.43528e-51	1.67691	0.345	0.138	1.89104e-46	6.1135e-44	0.927376	0.641	0.433	2.12701e-39	2.2195e-142	0.746893	0.474	0.499	7.72209e-138	1.51478e-32	8.87801e-142
Entpd1	1.64115e-42	0.767314	0.366	0.252	5.7099e-38	1.78034e-71	2.11507	0.348	0.086	6.19416e-67	6.32359e-131	1.56486	0.637	0.199	2.2001e-126	8.6421e-141	0.776481	0.435	0.493	3.00676e-136	1.64115e-42	3.45684e-140
Csrnp1	2.16144e-13	0.530147	0.511	0.367	7.52007e-09	2.76216e-38	1.23908	0.408	0.261	9.61012e-34	1.4542e-106	1.73238	0.867	0.418	5.05946e-102	2.1308e-135	1.01268	0.498	0.49	7.41348e-131	2.16144e-13	8.5232e-135
Ppp1r2	7.02615e-132	1.16598	0.716	0.38	2.44454e-127	3.71253e-29	1.30253	0.25	0.13	1.29166e-24	1.47429e-29	0.749534	0.693	0.448	5.12936e-25	5.38344e-94	0.473257	0.464	0.542	1.87301e-89	3.71253e-29	2.81046e-131
Coq10b	1.11349e-44	0.839135	0.623	0.425	3.87404e-40	9.26639e-51	1.49917	0.377	0.182	3.22396e-46	1.54726e-14	0.478542	0.5	0.372	5.38323e-10	2.69226e-130	0.874567	0.421	0.397	9.36692e-126	1.54726e-14	1.0769e-129
Coro1a	7.67221e-87	0.732553	0.987	0.903	2.66931e-82	1.17273e-23	0.463159	0.563	0.615	4.08017e-19	7.99146e-55	0.901232	0.948	0.839	2.78039e-50	3.31221e-129	0.925001	0.986	0.929	1.15238e-124	1.17273e-23	1.32488e-128
C5ar1	2.70907e-128	1.13608	0.822	0.302	9.42539e-124	6.77599e-50	1.68572	0.478	0.194	2.3575e-45	5.10906e-60	1.15326	0.922	0.55	1.77755e-55	1.14479e-46	0.783373	0.84	0.746	3.98294e-42	1.14479e-46	1.08363e-127
Fmnl1	6.92772e-18	0.438071	0.54	0.465	2.41029e-13	7.82127e-17	0.826212	0.241	0.19	2.72118e-12	9.00767e-125	1.52842	0.807	0.349	3.13395e-120	5.04699e-82	0.628294	0.421	0.385	1.75595e-77	7.82127e-17	3.60307e-124
Snx18	1.38013e-122	1.24294	0.71	0.325	4.80176e-118	4.66624e-30	1.38306	0.247	0.105	1.62348e-25	3.54129e-60	1.12675	0.859	0.551	1.23208e-55	3.33821e-95	0.644353	0.4	0.385	1.16143e-90	4.66624e-30	5.52053e-122
Actg1	1.08475e-93	0.82844	1	0.98	3.77405e-89	2.61935e-55	0.969963	0.937	0.885	9.11325e-51	8.37791e-66	0.954456	1	0.975	2.91484e-61	5.97503e-119	0.833618	0.998	0.99	2.07883e-114	2.61935e-55	2.39001e-118
Rhog	1.98954e-117	1.06343	0.824	0.57	6.922e-113	1.60212e-39	1.30939	0.31	0.172	5.57409e-35	2.52565e-77	1.06938	0.885	0.643	8.78723e-73	1.2362e-106	0.600385	0.703	0.768	4.30098e-102	1.60212e-39	7.95815e-117
Gcnt2	1.75462e-87	1.35316	0.437	0.13	6.10467e-83	7.85051e-57	1.91375	0.282	0.039	2.73135e-52	3.5798e-92	1.49645	0.633	0.132	1.24549e-87	3.1793e-117	1.21146	0.309	0.044	1.10614e-112	7.85051e-57	1.27172e-116
Gadd45b	2.20487e-09	0.285557	0.397	0.526	7.67119e-05	7.55377e-105	2.22639	0.513	0.274	2.62811e-100	1.34366e-28	1.31873	0.8	0.653	4.67485e-24	4.31933e-114	1.39505	0.56	0.63	1.50278e-109	2.20487e-09	1.72773e-113
Pla2g7	7.36314e-43	0.91197	0.339	0.245	2.56178e-38	9.4555e-40	1.50406	0.31	0.133	3.28976e-35	6.47452e-31	1.01099	0.774	0.537	2.25261e-26	1.28466e-111	0.981905	0.634	0.641	4.4696e-107	6.47452e-31	5.13865e-111
Cxcr4	5.26377e-13	0.61172	0.525	0.383	1.83137e-08	1.78454e-23	1.07031	0.421	0.285	6.20878e-19	3.72886e-15	0.850224	0.47	0.305	1.29735e-10	6.63769e-110	1.24567	0.426	0.197	2.30938e-105	5.26377e-13	2.65507e-109
Ostf1	6.07397e-109	0.82987	0.917	0.796	2.11326e-104	9.27633e-24	0.613407	0.335	0.349	3.22742e-19	3.34292e-51	0.800599	0.819	0.692	1.16307e-46	5.14157e-88	0.554658	0.893	0.934	1.78885e-83	9.27633e-24	2.42959e-108
Tnfrsf1a	1.34915e-76	0.981205	0.645	0.367	4.69396e-72	6.63825e-23	1.09132	0.247	0.139	2.30958e-18	3.94415e-50	0.957598	0.674	0.433	1.37225e-45	1.19417e-107	0.652941	0.545	0.615	4.15476e-103	6.63825e-23	4.77669e-107
Tlr2	3.34174e-67	1.04616	0.495	0.258	1.16266e-62	1.41827e-21	1.10406	0.266	0.153	4.93445e-17	3.05874e-06	0.339431	0.689	0.555	0.10642	4.38029e-103	0.879868	0.49	0.453	1.52399e-98	3.05874e-06	1.75212e-102
Fam107b	5.93012e-25	0.522761	0.611	0.418	2.06321e-20	2.64407e-14	0.924451	0.209	0.107	9.19926e-10	2.55259e-06	0.337108	0.348	0.221	0.0888095	1.13275e-102	0.836154	0.471	0.353	3.94105e-98	2.55259e-06	4.53099e-102
Snap23	2.39352e-42	0.695439	0.491	0.425	8.32753e-38	3.33713e-49	1.49816	0.307	0.154	1.16105e-44	8.82936e-35	0.669185	0.504	0.364	3.07191e-30	2.22749e-101	0.466735	0.479	0.602	7.74988e-97	8.82936e-35	8.90995e-101
Junb	0.00107773	0.304043	0.951	0.908	1	2.22949e-39	1.0223	0.861	0.765	7.75685e-35	1.25727e-100	1.57479	0.996	0.9	4.37429e-96	1.40887e-62	1.13007	0.954	0.947	4.90174e-58	0.00107773	5.02908e-100
Nfkbiz	5.91927e-15	0.523104	0.71	0.541	2.05943e-10	4.60187e-56	1.23231	0.658	0.528	1.60108e-51	1.12744e-81	1.39834	0.948	0.725	3.92261e-77	3.6857e-98	0.926171	0.679	0.743	1.28233e-93	5.91927e-15	1.47428e-97
Nfkbid	1.26848e-14	0.544022	0.457	0.364	4.41331e-10	6.82552e-20	1.00185	0.234	0.158	2.37473e-15	3.61511e-24	0.800402	0.574	0.33	1.25777e-19	9.00823e-98	0.862535	0.612	0.62	3.13414e-93	1.26848e-14	3.60329e-97
Fos	1.11224e-51	0.441075	0.964	0.714	3.8697e-47	3.30217e-08	0.457227	0.646	0.562	0.00114889	2.83247e-93	1.74573	0.97	0.692	9.85472e-89	0.00215593	0.294551	0.921	0.928	1	0.00215593	1.13299e-92
Slc15a3	5.69407e-65	0.898445	0.391	0.266	1.98108e-60	9.20906e-47	1.47011	0.418	0.209	3.20402e-42	8.29362e-27	0.75931	0.767	0.59	2.88552e-22	8.0269e-92	0.718026	0.393	0.354	2.79272e-87	8.29362e-27	3.21076e-91
Pde4b	1.44466e-55	0.978459	0.567	0.307	5.02625e-51	1.81949e-16	0.848644	0.285	0.229	6.33038e-12	5.45993e-29	0.858036	0.648	0.477	1.89962e-24	1.86452e-90	0.88806	0.352	0.229	6.48702e-86	1.81949e-16	7.45806e-90
Spi1	4.32065e-88	0.995254	0.899	0.547	1.50324e-83	1.46372e-37	1.01515	0.392	0.322	5.09256e-33	6.51914e-70	1.0654	0.933	0.731	2.26814e-65	8.99788e-77	0.707578	0.887	0.847	3.13054e-72	1.46372e-37	1.72826e-87
Iqgap1	3.20675e-26	0.479892	0.966	0.881	1.11569e-21	1.23752e-20	0.290227	0.424	0.531	4.30557e-16	3.51059e-87	1.08526	0.967	0.831	1.22141e-82	3.60009e-58	0.434156	0.826	0.905	1.25254e-53	1.23752e-20	1.40424e-86
Skap2	7.66827e-64	0.841471	0.712	0.439	2.66794e-59	4.16226e-14	0.409905	0.193	0.226	1.44813e-09	2.61294e-22	0.563076	0.707	0.582	9.09093e-18	9.58735e-87	0.555583	0.613	0.668	3.33563e-82	4.16226e-14	3.83494e-86
Ddx6	1.22026e-24	0.580116	0.734	0.665	4.24552e-20	5.89157e-42	1.2719	0.377	0.23	2.0498e-37	1.14854e-78	1.14769	0.9	0.715	3.996e-74	1.58477e-85	0.425119	0.543	0.69	5.51374e-81	1.22026e-24	6.33909e-85
Ccnl1	8.93836e-17	0.482018	0.784	0.678	3.10983e-12	5.08669e-13	0.340698	0.421	0.46	1.76976e-08	7.82564e-85	1.20569	0.896	0.748	2.7227e-80	8.02162e-68	0.453767	0.691	0.802	2.79088e-63	5.08669e-13	3.13026e-84
Ptpn6	1.84594e-16	0.404996	0.723	0.561	6.42241e-12	1.26571e-16	0.712665	0.209	0.187	4.40365e-12	1.15904e-67	1.12811	0.859	0.594	4.03253e-63	3.6488e-84	0.493159	0.629	0.706	1.26949e-79	1.84594e-16	1.45952e-83
Card19	1.30214e-14	0.499653	0.585	0.507	4.53042e-10	1.30107e-22	0.91173	0.253	0.195	4.52669e-18	4.97254e-13	0.484903	0.563	0.454	1.73004e-08	1.16386e-83	0.611889	0.534	0.562	4.04931e-79	4.97254e-13	4.65545e-83
Jdp2	3.72133e-83	1.14039	0.484	0.161	1.29472e-78	2.90223e-29	1.30217	0.206	0.088	1.00974e-24	1.38267e-22	0.724058	0.563	0.421	4.81058e-18	9.55432e-44	0.365003	0.206	0.206	3.32414e-39	1.38267e-22	1.48853e-82
Itgal	1.04231e-37	0.704071	0.609	0.339	3.6264e-33	6.76294e-41	1.57608	0.408	0.144	2.35296e-36	2.14023e-36	1.09575	0.67	0.352	7.44629e-32	6.03075e-83	1.08434	0.555	0.235	2.09822e-78	2.14023e-36	2.4123e-82
Picalm	7.59698e-23	0.622565	0.741	0.697	2.64314e-18	1.77745e-23	0.677349	0.497	0.472	6.18409e-19	5.17364e-09	0.398691	0.874	0.84	0.000180001	2.19632e-82	0.395252	0.6	0.793	7.64145e-78	5.17364e-09	8.78529e-82
Nfe2l2	0.0700853	0.270909	0.522	0.484	1	3.2111e-29	1.03606	0.396	0.302	1.11721e-24	8.10927e-79	1.34769	0.874	0.592	2.82138e-74	2.52779e-62	0.470013	0.619	0.749	8.79468e-58	0.0700853	3.24371e-78
Kpna4	1.17149e-13	0.349678	0.368	0.38	4.07586e-09	1.17353e-18	0.900675	0.225	0.146	4.08294e-14	4.05946e-33	0.617604	0.481	0.482	1.41237e-28	1.56725e-69	0.331104	0.349	0.476	5.45278e-65	1.17149e-13	6.269e-69
Cd300a	7.21034e-22	0.570759	0.399	0.284	2.50862e-17	3.05518e-15	0.932962	0.228	0.131	1.06296e-10	2.75762e-48	0.979559	0.504	0.2	9.5943e-44	1.87678e-67	0.533322	0.588	0.654	6.52968e-63	3.05518e-15	7.50711e-67
Birc3	1.58603e-06	0.325253	0.393	0.395	0.0551812	2.23474e-11	0.448307	0.222	0.225	7.7751e-07	5.46541e-44	0.99892	0.807	0.676	1.90153e-39	8.24281e-65	0.507422	0.294	0.306	2.86784e-60	1.58603e-06	3.29713e-64
Rab20	1.18098e-40	0.699062	0.324	0.111	4.10888e-36	1.5074e-38	1.47758	0.225	0.092	5.24455e-34	2.15353e-64	1.20164	0.663	0.287	7.49255e-60	5.38679e-32	0.267809	0.22	0.261	1.87417e-27	5.38679e-32	8.61411e-64
Vps37b	3.58443e-30	0.564355	0.542	0.293	1.24709e-25	1.23337e-40	1.80865	0.358	0.105	4.29115e-36	3.59576e-61	1.38472	0.578	0.164	1.25104e-56	2.5446e-26	0.276198	0.325	0.386	8.85318e-22	2.5446e-26	1.43831e-60
Ddx3x	1.95559e-05	0.26742	0.739	0.7	0.680388	2.79936e-25	0.869515	0.396	0.327	9.73954e-21	4.86416e-13	0.454482	0.796	0.796	1.69234e-08	5.50708e-61	0.284514	0.636	0.813	1.91602e-56	1.95559e-05	2.20283e-60
Emilin2	3.58775e-47	0.806863	0.377	0.233	1.24825e-42	5.67321e-23	1.08083	0.256	0.133	1.97382e-18	7.45598e-58	1.10045	0.589	0.289	2.59408e-53	3.73063e-39	0.419871	0.299	0.312	1.29796e-34	5.67321e-23	2.98239e-57
Clk1	1.20305e-09	0.307148	0.781	0.713	4.18565e-05	9.87095e-19	0.503912	0.339	0.363	3.4343e-14	1.85019e-13	0.480399	0.726	0.638	6.43719e-09	1.44249e-57	0.348612	0.679	0.797	5.01872e-53	1.20305e-09	5.76997e-57
Cks2	4.77949e-29	0.69302	0.411	0.267	1.66288e-24	1.44372e-08	0.49743	0.231	0.222	0.000502297	1.3936e-56	1.34272	0.467	0.183	4.84861e-52	2.72226e-54	0.755991	0.411	0.476	9.47127e-50	1.44372e-08	5.5744e-56
Cd53	1.01403e-06	0.261335	0.841	0.823	0.03528	8.62811e-54	1.05293	0.62	0.551	3.00189e-49	6.51932e-34	0.667717	0.97	0.86	2.2682e-29	6.26379e-56	0.287158	0.734	0.864	2.1793e-51	1.01403e-06	2.50552e-55
Notch2	1.55887e-10	0.275775	0.38	0.356	5.42362e-06	2.6977e-20	0.642237	0.297	0.31	9.38583e-16	1.28375e-26	0.65265	0.485	0.377	4.46643e-22	2.15281e-47	0.355367	0.278	0.325	7.49005e-43	1.55887e-10	8.61123e-47
Marcksl1	3.84687e-11	0.584233	0.509	0.38	1.3384e-06	1.12304e-44	1.42559	0.579	0.386	3.90727e-40	3.15797e-43	1.02225	0.952	0.71	1.09872e-38	2.1278e-42	0.498623	0.672	0.81	7.40306e-38	3.84687e-11	4.49214e-44
Wfdc17	3.67481e-20	0.65311	0.317	0.453	1.27854e-15	5.34971e-22	1.21019	0.601	0.625	1.86127e-17	8.59915e-06	0.450296	0.852	0.789	0.299182	1.963e-39	0.835181	0.299	0.366	6.82966e-35	8.59915e-06	7.85199e-39
Dusp5	0.00465594	0.252071	0.284	0.247	1	4.0584e-12	0.879151	0.247	0.168	1.412e-07	1.41011e-14	0.681909	0.411	0.228	4.90604e-10	3.50385e-34	0.520224	0.333	0.327	1.21906e-29	0.00465594	1.40154e-33

## Sheet: C9
	Exp_1_(S005)_p_val	S005_avg_log2FC	S005_pct.1	S005_pct.2	S005_p_val_adj	Exp_2_(SP024)_p_val	SP024_avg_log2FC	SP024_pct.1	SP024_pct.2	SP024_p_val_adj	Exp_3_(LPS)_p_val	LPS_avg_log2FC	LPS_pct.1	LPS_pct.2	LPS_p_val_adj	Exp_4_(S006)_p_val	S006_avg_log2FC	S006_pct.1	S006_pct.2	S006_p_val_adj	max_pval	minimump_p_val
Ctla2a	0	2.13758	0.949	0.192	0	1.47474e-132	3.67393	0.651	0.026	5.1309e-128	0	3.10391	0.966	0.202	0	9.90022e-113	2.41708	0.868	0.212	3.44448e-108	9.90022e-113	0
Gata3	0	2.81048	0.952	0.123	0	3.15329e-140	3.46392	0.581	0.009	1.09709e-135	0	2.78659	0.893	0.053	0	2.64548e-178	2.62241	0.822	0.027	9.20415e-174	3.15329e-140	0
Il7r	0	2.1336	0.983	0.368	0	3.6074e-71	2.53484	0.523	0.085	1.25509e-66	0	3.11355	0.984	0.263	0	1.33946e-89	1.73372	0.837	0.099	4.66026e-85	3.6074e-71	0
Pxdc1	0	2.3416	0.842	0.2	0	1.79516e-34	1.79008	0.262	0.036	6.24572e-30	5.25313e-41	0.646321	0.283	0.11	1.82767e-36	6.32383e-47	1.2348	0.729	0.383	2.20019e-42	1.79516e-34	0
Rora	1.60782e-257	1.87051	0.86	0.228	5.59393e-253	1.45956e-60	2.83324	0.407	0.033	5.07809e-56	0	2.39573	0.834	0.117	0	3.0468e-149	2.45359	0.876	0.104	1.06004e-144	1.45956e-60	0
Itk	1.29914e-253	1.87267	0.724	0.131	4.51995e-249	4.57164e-61	2.33898	0.331	0.011	1.59056e-56	0	2.72927	0.86	0.056	0	6.4409e-106	1.50397	0.752	0.039	2.24092e-101	4.57164e-61	0
Rplp1	2.04709e-229	1.1222	0.997	0.965	7.12223e-225	8.06897e-97	1.35463	0.959	0.886	2.80736e-92	0	1.49636	0.987	0.981	0	2.21967e-75	1.01116	1	0.979	7.72267e-71	2.21967e-75	0
Nfkb1	1.33664e-218	1.37942	0.88	0.588	4.65044e-214	3.85657e-43	1.77988	0.535	0.245	1.34178e-38	0	1.82548	0.979	0.78	0	8.49727e-95	1.50329	0.884	0.567	2.95637e-90	3.85657e-43	0
Ets1	4.00975e-216	1.41634	0.952	0.359	1.39507e-211	5.04019e-70	2.48895	0.593	0.069	1.75358e-65	0	2.45547	0.951	0.147	0	7.65431e-72	1.63084	0.791	0.128	2.66309e-67	5.04019e-70	0
Il2ra	1.92075e-208	1.58888	0.636	0.105	6.68266e-204	2.62949e-61	2.35122	0.378	0.024	9.14852e-57	0	2.53435	0.866	0.118	0	4.16026e-142	1.6546	0.705	0.012	1.44744e-137	2.62949e-61	0
Ppp1cc	2.53544e-197	1.32206	0.786	0.502	8.82132e-193	2.87213e-21	1.37439	0.273	0.108	9.9927e-17	0	1.89657	0.844	0.479	0	4.92211e-10	0.429833	0.775	0.687	1.7125e-05	4.92211e-10	0
Nrip1	1.04182e-196	1.53047	0.733	0.361	3.62469e-192	3.99476e-53	2.14257	0.448	0.087	1.38986e-48	0	2.45036	0.945	0.473	0	2.94454e-35	0.946003	0.713	0.461	1.02446e-30	2.94454e-35	0
Emb	3.88655e-188	1.45095	0.952	0.575	1.35221e-183	1.29013e-24	1.34484	0.401	0.228	4.48863e-20	0	3.01939	0.987	0.455	0	5.9077e-47	1.34348	0.899	0.487	2.05541e-42	1.29013e-24	0
Il1rl1	8.55216e-159	1.50407	0.576	0.156	2.97547e-154	1.94464e-68	2.43991	0.453	0.106	6.76578e-64	0	2.825	0.901	0.154	0	5.04833e-32	0.585575	0.721	0.227	1.75641e-27	5.04833e-32	0
Pde7a	1.4868e-150	1.27749	0.668	0.228	5.17288e-146	1.73093e-22	1.46011	0.215	0.031	6.02226e-18	0	2.42373	0.881	0.142	0	5.938e-06	0.299359	0.364	0.197	0.206595	5.938e-06	0
Rps21	3.20488e-128	0.742905	1	0.976	1.11504e-123	2.32374e-23	0.773606	0.779	0.723	8.08475e-19	0	1.43588	0.992	0.944	0	9.12668e-37	0.681415	1	0.991	3.17536e-32	2.32374e-23	0
Aff4	9.0593e-115	1.02849	0.635	0.337	3.15191e-110	3.31843e-16	1.18172	0.227	0.109	1.15455e-11	0	2.15451	0.891	0.358	0	1.95499e-25	0.819612	0.698	0.38	6.80179e-21	3.31843e-16	0
Rpl5	3.97196e-114	0.747261	0.995	0.906	1.38192e-109	3.49239e-16	0.671852	0.622	0.573	1.21507e-11	0	1.27334	0.969	0.891	0	2.25282e-33	0.700473	1	0.966	7.83801e-29	3.49239e-16	0
Coro2a	6.63311e-98	1.00643	0.533	0.213	2.30779e-93	3.30778e-23	1.40277	0.215	0.058	1.15084e-18	0	1.85667	0.744	0.258	0	3.40775e-42	0.968898	0.605	0.121	1.18562e-37	3.30778e-23	0
Pdcd4	9.6543e-87	0.977458	0.724	0.42	3.35893e-82	4.66267e-11	0.902074	0.297	0.196	1.62223e-06	0	2.10734	0.86	0.2	0	1.39389e-10	0.662007	0.512	0.254	4.84963e-06	1.39389e-10	0
Rps20	1.46526e-135	0.830584	0.995	0.938	5.09792e-131	8.91032e-21	0.720554	0.733	0.682	3.10008e-16	1.28191e-315	1.3033	0.979	0.932	0	8.58896e-73	1.07637	1	0.977	2.98827e-68	8.91032e-21	5.12765e-315
Tmem64	1.01517e-186	1.4397	0.744	0.256	3.53198e-182	5.96084e-30	1.7075	0.25	0.044	2.0739e-25	0	1.80604	0.679	0.155	0	1.07155e-38	1.04398	0.698	0.204	3.72814e-34	5.96084e-30	0
Rps27	2.29909e-78	0.562801	0.998	0.973	7.99901e-74	3.38906e-38	0.804736	0.988	0.974	1.17912e-33	0	1.32003	0.972	0.916	0	3.36394e-17	0.463864	1	0.996	1.17038e-12	3.36394e-17	0
Ltb4r1	1.92987e-128	1.22838	0.748	0.308	6.71441e-124	2.78248e-14	0.907302	0.227	0.176	9.68082e-10	2.36274e-306	1.88862	0.795	0.205	8.22044e-302	7.54225e-74	1.94826	0.806	0.134	2.6241e-69	2.78248e-14	9.45096e-306
Rpl13a	3.93661e-25	0.38592	0.721	0.627	1.36963e-20	1.59627e-38	0.885912	0.936	0.901	5.55375e-34	6.70184e-305	1.20776	0.977	0.939	2.33171e-300	1.93312e-06	0.345774	0.744	0.63	0.0672572	1.93312e-06	2.68074e-304
Fam107b	9.00672e-91	0.934199	0.696	0.408	3.13362e-86	1.80204e-10	1.03354	0.244	0.108	6.26966e-06	8.90904e-296	1.79314	0.744	0.183	3.09963e-291	2.46034e-34	0.991002	0.729	0.355	8.56002e-30	1.80204e-10	3.56362e-295
Rpl17	1.48055e-92	0.646908	0.992	0.957	5.15112e-88	5.2979e-21	0.696907	0.901	0.848	1.84324e-16	1.13983e-293	1.22377	0.974	0.926	3.96571e-289	7.19406e-34	0.703361	1	0.981	2.50296e-29	5.2979e-21	4.55934e-293
Ptprcap	7.9903e-203	1.21411	0.934	0.32	2.77999e-198	1.22406e-46	2.13585	0.378	0.035	4.25875e-42	7.77652e-293	1.72225	0.692	0.067	2.70561e-288	3.33544e-99	1.89841	0.946	0.134	1.16047e-94	1.22406e-46	3.11061e-292
Rpl12	1.28033e-128	0.861422	0.992	0.898	4.45453e-124	1.09709e-20	0.828145	0.616	0.555	3.81699e-16	4.01558e-285	1.27449	0.967	0.896	1.3971e-280	7.29935e-55	0.9809	1	0.961	2.53959e-50	1.09709e-20	1.60623e-284
Itgb7	1.58113e-150	1.18618	0.895	0.446	5.50108e-146	6.06711e-27	1.53077	0.337	0.124	2.11087e-22	9.18664e-285	1.82355	0.805	0.196	3.19622e-280	2.66135e-58	1.34864	0.775	0.149	9.25937e-54	6.06711e-27	3.67466e-284
Rps14	1.97401e-85	0.571209	0.998	0.971	6.86797e-81	1.03617e-28	0.661623	0.959	0.946	3.60505e-24	1.04108e-280	1.13355	0.979	0.953	3.62213e-276	2.21623e-18	0.450823	1	0.986	7.71072e-14	2.21623e-18	4.16432e-280
Arg1	8.48193e-278	2.02207	0.52	0.017	2.95103e-273	3.65719e-44	1.91677	0.273	0.012	1.27241e-39	2.02168e-207	1.3217	0.51	0.043	7.03384e-203	1.21009e-160	2.87325	0.829	0.022	4.21014e-156	3.65719e-44	3.39277e-277
Mdfic	3.08958e-144	1.17856	0.648	0.319	1.07493e-139	2.24879e-20	1.34709	0.25	0.08	7.824e-16	3.22864e-274	1.4549	0.785	0.449	1.12331e-269	3.87115e-13	0.559425	0.504	0.28	1.34685e-08	3.87115e-13	1.29146e-273
Sptssa	7.52984e-272	1.52123	0.877	0.592	2.61978e-267	8.23505e-47	1.67963	0.413	0.217	2.86514e-42	7.49257e-254	1.39322	0.71	0.35	2.60682e-249	1.81287e-12	0.561591	0.868	0.704	6.30732e-08	1.81287e-12	3.01194e-271
Rpl37a	1.65505e-106	0.639233	1	0.982	5.75825e-102	5.52223e-35	0.754595	0.988	0.971	1.92129e-30	5.94443e-268	1.15752	0.982	0.974	2.06819e-263	3.45977e-34	0.620001	1	0.995	1.20372e-29	3.45977e-34	2.37777e-267
Rpl18a	1.15434e-87	0.632676	0.997	0.96	4.01618e-83	1.16147e-28	0.798062	0.942	0.917	4.04097e-24	5.02622e-264	1.19918	0.976	0.919	1.74872e-259	1.20478e-35	0.741739	1	0.984	4.19167e-31	1.16147e-28	2.01049e-263
Uhrf2	3.22535e-143	1.20487	0.703	0.338	1.12216e-138	2.10602e-73	2.65585	0.506	0.104	7.32727e-69	1.25205e-263	1.68486	0.761	0.35	4.35613e-259	4.03259e-24	0.836057	0.682	0.424	1.40302e-19	4.03259e-24	5.0082e-263
Rpl30	1.80704e-104	0.666304	0.997	0.966	6.28705e-100	2.23055e-23	0.708378	0.593	0.6	7.76052e-19	7.43717e-263	1.18845	0.98	0.921	2.58754e-258	5.08573e-35	0.684241	1	0.988	1.76943e-30	2.23055e-23	2.97487e-262
Shisa5	8.52464e-173	1.17063	0.963	0.739	2.96589e-168	1.29948e-34	1.38926	0.552	0.34	4.52116e-30	2.33521e-260	1.28931	0.953	0.839	8.12467e-256	0.000217376	0.379456	0.806	0.721	1	0.000217376	9.34084e-260
Prdx6	2.95386e-33	0.609187	0.708	0.562	1.02771e-28	2.60063e-20	1.46808	0.291	0.129	9.04812e-16	2.47588e-259	1.82456	0.782	0.421	8.61409e-255	2.6651e-57	1.39766	0.899	0.514	9.27241e-53	2.60063e-20	9.90353e-259
Rps10	3.32435e-121	0.736471	0.993	0.972	1.15661e-116	5.26778e-13	0.51852	0.756	0.737	1.83277e-08	6.0574e-259	1.10635	0.98	0.939	2.10749e-254	3.97479e-48	0.786434	1	0.99	1.38291e-43	5.26778e-13	2.42296e-258
Rps24	2.54805e-107	0.710169	0.998	0.976	8.86517e-103	2.43146e-19	0.682573	0.919	0.886	8.45955e-15	6.61262e-254	1.16274	0.99	0.967	2.30066e-249	5.07067e-42	0.728374	1	0.99	1.76419e-37	2.43146e-19	2.64505e-253
Furin	7.31413e-244	2.08631	0.836	0.481	2.54473e-239	6.39674e-90	2.33938	0.767	0.399	2.22555e-85	2.50341e-213	1.85618	0.686	0.501	8.70987e-209	3.15267e-136	2.22353	0.837	0.362	1.09688e-131	6.39674e-90	2.92565e-243
Kit	2.11184e-237	1.60309	0.703	0.113	7.34753e-233	1.46341e-42	2.04129	0.238	0.012	5.09149e-38	8.63338e-218	1.59499	0.645	0.112	3.00372e-213	4.39775e-73	0.954275	0.822	0.145	1.53006e-68	1.46341e-42	8.44738e-237
Ltb	6.71554e-168	1.38137	0.887	0.354	2.33647e-163	1.11863e-32	2.03192	0.308	0.037	3.89192e-28	6.91226e-236	1.85899	0.676	0.111	2.40491e-231	4.69952e-62	1.33563	0.736	0.105	1.63506e-57	1.11863e-32	2.7649e-235
Cdc42ep3	5.15088e-231	1.55751	0.774	0.294	1.7921e-226	3.91096e-21	1.45839	0.209	0.038	1.3607e-16	1.26359e-108	1.10174	0.518	0.143	4.39627e-104	1.13831e-11	0.564077	0.512	0.249	3.9604e-07	1.13831e-11	2.06035e-230
Ncor1	9.37005e-108	0.912491	0.907	0.708	3.26003e-103	1.63636e-17	1.27646	0.32	0.154	5.69322e-13	1.2354e-227	1.26946	0.871	0.618	4.29819e-223	1.13054e-22	0.72084	0.876	0.723	3.93336e-18	1.63636e-17	4.94158e-227
Elovl5	6.01221e-110	0.93456	0.523	0.266	2.09177e-105	1.75794e-32	1.61792	0.349	0.131	6.11623e-28	1.08284e-224	1.3923	0.669	0.336	3.76742e-220	1.76019e-19	0.602324	0.457	0.142	6.12404e-15	1.76019e-19	4.33136e-224
Rps15	1.84211e-46	0.418645	0.997	0.946	6.40906e-42	4.26442e-23	0.727652	0.866	0.821	1.48368e-18	5.8834e-222	0.977621	0.985	0.946	2.04695e-217	1.25536e-25	0.599321	0.992	0.971	4.36765e-21	4.26442e-23	2.35336e-221
Prrc2c	1.31903e-63	0.690589	0.759	0.636	4.58916e-59	4.24649e-14	1.07117	0.32	0.213	1.47744e-09	1.61132e-221	1.20842	0.889	0.726	5.60611e-217	0.000226063	0.252523	0.845	0.706	1	0.000226063	6.44529e-221
Rps7	2.6145e-117	0.796353	0.992	0.936	9.09637e-113	2.41067e-30	0.904869	0.86	0.759	8.38721e-26	4.73457e-219	1.09106	0.972	0.908	1.64725e-214	1.50122e-51	0.904126	1	0.979	5.22305e-47	2.41067e-30	1.89383e-218
Rps3a1	8.82701e-107	0.694052	0.998	0.968	3.07109e-102	2.5168e-18	0.597188	0.919	0.861	8.75647e-14	6.27967e-216	0.955059	0.98	0.952	2.18482e-211	6.79433e-57	0.881017	1	0.991	2.36388e-52	2.5168e-18	2.51187e-215
Rpl21	5.45458e-129	0.787608	0.99	0.942	1.89776e-124	4.29698e-37	0.916445	0.878	0.817	1.49501e-32	6.79016e-211	1.0729	0.971	0.883	2.36243e-206	2.53694e-38	0.740922	0.992	0.977	8.82652e-34	4.29698e-37	2.71606e-210
Rps16	7.63625e-86	0.581226	0.998	0.981	2.6568e-81	2.12464e-20	0.692692	0.948	0.886	7.39206e-16	2.96783e-210	0.999033	0.977	0.952	1.03257e-205	3.5787e-41	0.730875	1	0.991	1.2451e-36	2.12464e-20	1.18713e-209
Rpl23	1.22964e-85	0.595423	0.997	0.976	4.27818e-81	1.41774e-14	0.498291	0.826	0.843	4.93261e-10	1.50306e-208	0.989437	0.987	0.955	5.22944e-204	9.56994e-31	0.618251	1	0.992	3.32957e-26	1.41774e-14	6.01223e-208
Rps4x	2.9538e-87	0.625426	0.995	0.955	1.02768e-82	2.28224e-28	0.769881	0.948	0.86	7.94037e-24	1.89126e-208	1.05664	0.976	0.926	6.58006e-204	2.1636e-62	0.936833	1	0.985	7.5276e-58	2.28224e-28	7.56502e-208
Cxcr6	9.61258e-206	0.582797	0.804	0.225	3.34441e-201	1.01281e-32	1.82308	0.233	0.014	3.52378e-28	1.28977e-46	0.375707	0.208	0.043	4.48736e-42	3.37155e-144	2.38519	0.837	0.025	1.17303e-139	1.01281e-32	3.84503e-205
Tpt1	3.37556e-48	0.391273	0.997	0.995	1.17443e-43	5.1296e-08	0.288008	0.913	0.946	0.00178469	2.15925e-205	0.892924	0.984	0.985	7.51245e-201	1.09593e-12	0.32975	1	0.999	3.81295e-08	5.1296e-08	8.63699e-205
Rpl19	6.78179e-131	0.791133	0.998	0.959	2.35952e-126	2.66184e-31	0.862986	0.86	0.806	9.26106e-27	3.6954e-205	0.938473	0.982	0.952	1.2857e-200	1.14063e-62	0.905393	1	0.989	3.96848e-58	2.66184e-31	1.47816e-204
Eef2	2.36972e-33	0.38418	0.98	0.887	8.24473e-29	5.83065e-09	0.372764	0.535	0.577	0.00020286	6.98509e-205	0.993042	0.966	0.886	2.43025e-200	4.97726e-06	0.320241	0.961	0.908	0.173169	4.97726e-06	2.79404e-204
Ly6a	1.69788e-82	0.944014	0.689	0.291	5.90726e-78	5.08016e-28	1.79014	0.326	0.056	1.76749e-23	9.09366e-205	1.39342	0.972	0.506	3.16387e-200	5.83307e-32	0.854284	0.333	0.028	2.02944e-27	5.08016e-28	3.63746e-204
Rpsa	1.74453e-117	0.787417	0.997	0.945	6.06956e-113	2.39947e-13	0.594995	0.831	0.758	8.34822e-09	9.87563e-204	1.01387	0.989	0.952	3.43593e-199	2.43693e-78	1.19822	1	0.983	8.47858e-74	2.39947e-13	3.95025e-203
Rps13	8.71887e-83	0.592733	0.995	0.96	3.03347e-78	1.10029e-22	0.703598	0.837	0.813	3.82814e-18	1.15951e-201	1.01806	0.976	0.914	4.03418e-197	8.92971e-43	0.753803	1	0.985	3.10682e-38	1.10029e-22	4.63805e-201
Hcst	2.66155e-114	1.04056	0.822	0.404	9.26006e-110	2.1883e-36	1.82853	0.471	0.135	7.61355e-32	3.72363e-201	1.49689	0.686	0.211	1.29553e-196	2.80783e-12	0.571598	0.674	0.397	9.76902e-08	2.80783e-12	1.48945e-200
Ccdc184	6.46781e-200	1.47707	0.4	0.016	2.25028e-195	3.19098e-47	1.68479	0.203	0.002	1.11021e-42	3.06076e-168	1.07821	0.334	0.014	1.0649e-163	1.0799e-50	0.632775	0.24	0.001	3.75719e-46	3.19098e-47	2.58713e-199
Cd82	4.09855e-104	1.05226	0.789	0.444	1.42597e-99	1.41412e-25	1.59098	0.308	0.068	4.92002e-21	6.55777e-200	1.47524	0.7	0.306	2.28158e-195	3.05891e-38	1.07309	0.729	0.254	1.06425e-33	1.41412e-25	2.62311e-199
Rps11	6.83102e-95	0.667727	0.997	0.959	2.37665e-90	4.05165e-15	0.572859	0.901	0.872	1.40965e-10	6.7906e-196	1.07411	0.98	0.898	2.36259e-191	1.10295e-27	0.607919	1	0.989	3.83737e-23	4.05165e-15	2.71624e-195
Thy1	5.80749e-195	0.996274	0.834	0.237	2.02054e-190	1.37232e-45	2.01719	0.32	0.02	4.77457e-41	1.08031e-161	1.04209	0.482	0.061	3.7586e-157	6.7281e-55	0.724205	0.465	0.035	2.34084e-50	1.37232e-45	2.323e-194
Rgs2	1.0152e-98	1.48548	0.701	0.594	3.53209e-94	1.12293e-79	2.69602	0.616	0.182	3.9069e-75	8.99499e-195	2.15469	0.686	0.395	3.12954e-190	7.37085e-51	1.49942	0.853	0.61	2.56447e-46	7.37085e-51	3.598e-194
Rpl9	1.76618e-118	0.720821	0.993	0.967	6.14488e-114	1.65702e-29	0.795683	0.884	0.827	5.7651e-25	1.31347e-190	0.953202	0.972	0.91	4.56982e-186	3.2557e-52	0.805116	1	0.991	1.13272e-47	1.65702e-29	5.25388e-190
Rpl38	1.72818e-84	0.591532	0.993	0.962	6.01268e-80	2.75636e-19	0.572923	0.907	0.915	9.58992e-15	6.84236e-186	0.914832	0.992	0.957	2.38059e-181	3.66843e-39	0.698166	1	0.991	1.27632e-34	2.75636e-19	2.73694e-185
Id2	8.1795e-185	1.44761	0.972	0.529	2.84581e-180	7.24767e-35	1.69392	0.535	0.289	2.52161e-30	9.07019e-150	1.36642	0.915	0.606	3.1557e-145	1.36897e-37	1.16913	0.946	0.488	4.76291e-33	7.24767e-35	3.2718e-184
Fosb	5.97486e-44	1.0039	0.605	0.485	2.07877e-39	1.99305e-15	0.94105	0.477	0.416	6.93423e-11	1.42563e-183	2.05429	0.668	0.315	4.96007e-179	0.00628322	0.285822	0.86	0.762	1	0.00628322	5.70254e-183
Ccnd2	1.79362e-182	1.44172	0.905	0.389	6.24035e-178	3.55961e-23	1.43122	0.384	0.188	1.23846e-18	1.13265e-90	0.862665	0.901	0.584	3.94072e-86	2.46731e-47	1.25764	0.798	0.202	8.58427e-43	3.55961e-23	7.17446e-182
Rpl27a	1.15043e-84	0.594957	0.998	0.974	4.00259e-80	9.01877e-18	0.631678	0.878	0.833	3.13781e-13	4.88105e-182	0.876667	0.984	0.958	1.69822e-177	8.09163e-35	0.654927	1	0.99	2.81524e-30	9.01877e-18	1.95242e-181
Il2rg	8.12306e-180	1.41317	0.831	0.387	2.82617e-175	3.66128e-28	1.63764	0.302	0.106	1.27383e-23	1.04481e-174	1.12871	0.757	0.516	3.63511e-170	1.93142e-72	1.47793	0.891	0.274	6.71979e-68	3.66128e-28	3.24922e-179
Eef1b2	8.46867e-86	0.674197	0.98	0.88	2.94642e-81	6.77973e-11	0.569534	0.419	0.39	2.3588e-06	9.75616e-180	1.04448	0.94	0.815	3.39436e-175	2.7449e-40	0.831673	0.992	0.942	9.55006e-36	6.77973e-11	3.90246e-179
Rpl36a	2.541e-98	0.749947	0.978	0.844	8.84063e-94	9.32746e-24	0.768761	0.826	0.733	3.24521e-19	1.1423e-177	1.03443	0.941	0.813	3.97429e-173	4.32809e-47	0.908977	1	0.944	1.50583e-42	9.32746e-24	4.56919e-177
Uqcrh	1.09088e-17	0.304251	0.934	0.872	3.7954e-13	8.91059e-11	0.395909	0.541	0.583	3.10017e-06	1.95825e-177	0.990767	0.909	0.793	6.81313e-173	3.23771e-07	0.3563	0.953	0.912	0.0112647	3.23771e-07	7.83298e-177
Tmsb10	9.37164e-135	0.98495	0.987	0.748	3.26058e-130	5.01104e-39	1.0441	0.983	0.795	1.74344e-34	1.15437e-176	1.25124	0.963	0.6	4.0163e-172	2.03074e-60	1.53568	1	0.783	7.06535e-56	5.01104e-39	4.61749e-176
Ramp1	5.45835e-59	0.668876	0.749	0.433	1.89907e-54	3.16231e-18	1.06858	0.233	0.147	1.10023e-13	5.58381e-176	1.27402	0.518	0.095	1.94272e-171	3.20251e-22	1.04653	0.69	0.302	1.11422e-17	3.16231e-18	2.23352e-175
Rps3	9.23741e-103	0.680657	0.992	0.953	3.21388e-98	3.20462e-28	0.713713	0.884	0.853	1.11495e-23	1.28467e-168	0.909093	0.974	0.907	4.46962e-164	5.86678e-60	0.902291	1	0.984	2.04117e-55	3.20462e-28	5.13868e-168
Rpl39	3.43825e-73	0.576657	0.997	0.952	1.19623e-68	3.8891e-15	0.505722	0.872	0.866	1.35309e-10	1.1739e-167	0.958091	0.969	0.922	4.08423e-163	5.58726e-56	0.923527	1	0.99	1.94392e-51	3.8891e-15	4.69559e-167
Rplp2	4.53789e-75	0.533634	0.997	0.956	1.57882e-70	3.81547e-28	0.74524	0.919	0.875	1.32748e-23	1.70296e-167	0.82036	0.989	0.964	5.92493e-163	6.43672e-53	0.822272	0.992	0.98	2.23946e-48	3.81547e-28	6.81183e-167
Rps5	1.04179e-81	0.6	0.998	0.941	3.6246e-77	3.30249e-21	0.636689	0.884	0.876	1.149e-16	2.21853e-165	0.88864	0.971	0.925	7.71869e-161	1.91233e-38	0.810294	1	0.976	6.65337e-34	3.30249e-21	8.8741e-165
Rpl23a	8.25735e-29	0.359483	0.978	0.921	2.8729e-24	3.74087e-30	0.786436	0.919	0.879	1.30152e-25	1.84251e-164	0.88262	0.971	0.919	6.41045e-160	8.01738e-26	0.642647	0.992	0.953	2.78941e-21	8.01738e-26	7.37003e-164
Rgcc	6.71707e-164	2.1368	0.699	0.274	2.337e-159	2.84727e-48	2.51168	0.448	0.18	9.90623e-44	7.46921e-43	0.720043	0.445	0.191	2.59869e-38	6.82171e-116	2.82409	0.876	0.118	2.37341e-111	7.46921e-43	2.68683e-163
Rps6	2.39512e-81	0.633989	0.99	0.903	8.3331e-77	4.71441e-37	0.909095	0.895	0.813	1.64024e-32	1.61005e-162	0.886571	0.971	0.914	5.60169e-158	8.18862e-42	0.846148	1	0.958	2.84898e-37	4.71441e-37	6.44021e-162
Rpl34	8.69465e-83	0.589156	0.992	0.962	3.02504e-78	4.97701e-18	0.59851	0.895	0.842	1.7316e-13	4.67515e-162	0.888037	0.971	0.92	1.62658e-157	6.90503e-24	0.524926	1	0.988	2.4024e-19	4.97701e-18	1.87006e-161
Rps23	2.63531e-75	0.540287	0.993	0.952	9.16877e-71	3.60767e-23	0.661751	0.924	0.9	1.25518e-18	3.75555e-161	0.830304	0.979	0.944	1.30663e-156	1.05311e-28	0.571227	1	0.981	3.66399e-24	3.60767e-23	1.50222e-160
Tnfrsf18	4.70676e-159	1.42016	0.643	0.183	1.63758e-154	1.65523e-45	1.99542	0.326	0.032	5.75888e-41	1.07502e-155	1.23096	0.492	0.079	3.7402e-151	1.37425e-98	1.54505	0.636	0.027	4.78128e-94	1.65523e-45	1.8827e-158
Zc3hav1	3.76569e-52	0.696442	0.515	0.424	1.31016e-47	2.9943e-28	1.55227	0.39	0.189	1.04178e-23	1.47667e-158	1.20643	0.704	0.58	5.13761e-154	4.64992e-42	1.11706	0.775	0.448	1.6178e-37	2.9943e-28	5.90666e-158
Rpl8	2.13514e-157	0.852657	0.995	0.95	7.42859e-153	5.3883e-28	0.803936	0.86	0.775	1.8747e-23	1.85955e-151	0.772388	0.982	0.956	6.46976e-147	7.27536e-62	0.923907	1	0.979	2.53124e-57	5.3883e-28	8.54057e-157
Vps37b	3.60966e-48	1.05062	0.522	0.293	1.25587e-43	1.97144e-39	2.17561	0.453	0.108	6.85903e-35	3.14007e-157	1.68205	0.549	0.147	1.09249e-152	9.07085e-60	1.50838	0.845	0.379	3.15593e-55	1.97144e-39	1.25603e-156
Rpl13	1.04274e-110	0.749076	0.997	0.966	3.62791e-106	5.55659e-29	0.748858	0.965	0.923	1.93325e-24	1.42025e-156	0.853361	0.98	0.954	4.94133e-152	9.05597e-49	0.860911	1	0.988	3.15075e-44	5.55659e-29	5.68099e-156
Rpl22	1.0516e-71	0.551476	0.99	0.915	3.65872e-67	5.67017e-13	0.414394	0.616	0.652	1.97276e-08	1.65737e-150	0.861121	0.969	0.887	5.76631e-146	1.0367e-42	0.812559	1	0.964	3.6069e-38	5.67017e-13	6.62946e-150
Samsn1	2.92618e-146	1.29052	0.836	0.406	1.01807e-141	1.19728e-35	1.68386	0.576	0.256	4.16559e-31	1.49485e-36	0.489726	0.805	0.635	5.20087e-32	1.52731e-79	1.82484	0.938	0.424	5.3138e-75	1.19728e-35	1.17047e-145
4930523C07Rik	1.14637e-131	1.16226	0.789	0.43	3.98845e-127	1.08714e-21	1.34684	0.314	0.159	3.78239e-17	2.79485e-145	1.20525	0.681	0.322	9.72385e-141	5.45455e-39	1.13643	0.636	0.163	1.89775e-34	1.08714e-21	1.11794e-144
Rps18	5.28429e-101	0.715422	0.992	0.906	1.83851e-96	2.12015e-34	0.936087	0.959	0.884	7.37644e-30	4.25027e-145	0.940273	0.963	0.864	1.47875e-140	3.73522e-59	0.993294	1	0.965	1.29956e-54	2.12015e-34	1.70011e-144
Eef1a1	7.6036e-73	0.572665	1	0.976	2.64544e-68	2.16839e-14	0.573311	0.93	0.899	7.54427e-10	6.97573e-145	0.764262	0.997	0.977	2.427e-140	1.09696e-23	0.597152	1	0.993	3.81654e-19	2.16839e-14	2.79029e-144
Rpl4	1.53194e-49	0.506883	0.962	0.843	5.32991e-45	1.57682e-20	0.741723	0.703	0.648	5.48607e-16	7.39668e-142	0.888442	0.951	0.833	2.57345e-137	5.85058e-34	0.77562	0.953	0.908	2.03553e-29	1.57682e-20	2.95867e-141
Rps15a	1.80341e-87	0.640027	0.995	0.944	6.27441e-83	3.08209e-29	0.844847	0.878	0.82	1.07232e-24	3.14901e-140	0.858018	0.972	0.903	1.0956e-135	4.20311e-49	0.840168	1	0.983	1.46235e-44	3.08209e-29	1.25961e-139
Nfkbid	2.84482e-31	0.525739	0.379	0.371	9.89768e-27	5.22104e-27	1.52064	0.355	0.157	1.8165e-22	2.51398e-139	1.41028	0.521	0.323	8.74665e-135	3.61389e-08	0.444102	0.822	0.618	0.00125734	3.61389e-08	1.00559e-138
Lmo4	7.73453e-125	1.43	0.756	0.483	2.691e-120	2.87131e-107	2.97743	0.634	0.174	9.98987e-103	8.51162e-139	1.3593	0.782	0.52	2.96136e-134	7.14266e-98	1.86751	0.922	0.508	2.48507e-93	7.14266e-98	3.40465e-138
Rpl7	3.55952e-66	0.508034	0.995	0.957	1.23843e-61	7.82401e-13	0.451608	0.692	0.727	2.72213e-08	3.34971e-137	0.783864	0.971	0.921	1.16543e-132	3.40315e-39	0.725501	1	0.979	1.18402e-34	7.82401e-13	1.33988e-136
Rpl32	1.91891e-85	0.654797	0.993	0.941	6.67627e-81	3.58551e-30	0.822569	0.959	0.885	1.24747e-25	5.14599e-136	0.863614	0.974	0.921	1.79039e-131	7.3112e-51	0.845181	1	0.981	2.54371e-46	3.58551e-30	2.0584e-135
Lat	7.50855e-83	0.442352	0.565	0.21	2.61237e-78	1.37407e-22	1.45125	0.203	0.02	4.78068e-18	1.97248e-135	0.944677	0.427	0.054	6.86266e-131	4.51921e-50	0.958331	0.597	0.076	1.57232e-45	1.37407e-22	7.88993e-135
Rpl36	5.32019e-72	0.580029	0.992	0.929	1.851e-67	1.40282e-22	0.68984	0.895	0.848	4.88068e-18	2.23525e-134	0.790628	0.972	0.921	7.77689e-130	7.29054e-33	0.662809	1	0.983	2.53652e-28	1.40282e-22	8.94101e-134
Rpl27	3.95727e-62	0.57993	0.958	0.863	1.37681e-57	2.67931e-23	0.781592	0.831	0.756	9.32187e-19	1.78078e-132	0.746854	0.976	0.933	6.1957e-128	2.93299e-31	0.729411	0.992	0.839	1.02044e-26	2.67931e-23	7.12313e-132
Rps12	3.82314e-51	0.430667	0.997	0.977	1.33015e-46	2.27851e-13	0.560682	0.779	0.746	7.9274e-09	1.68715e-123	0.755784	0.982	0.959	5.86994e-119	6.94577e-34	0.675925	1	0.982	2.41657e-29	2.27851e-13	6.74861e-123
Rps19	1.48433e-61	0.50454	0.995	0.926	5.16429e-57	3.65596e-22	0.625047	0.965	0.927	1.27198e-17	1.52592e-120	0.768661	0.979	0.921	5.309e-116	6.39213e-25	0.666868	0.984	0.964	2.22395e-20	3.65596e-22	6.1037e-120
Rpl14	2.11187e-103	0.713882	0.988	0.899	7.34761e-99	1.38562e-30	0.847838	0.837	0.795	4.82087e-26	2.75148e-120	0.787086	0.972	0.888	9.57294e-116	6.14994e-50	0.917493	1	0.962	2.13969e-45	1.38562e-30	1.10059e-119
Gpr183	2.94319e-102	1.1762	0.714	0.444	1.02399e-97	1.7026e-15	1.31489	0.203	0.055	5.9237e-11	3.30689e-119	1.16143	0.572	0.286	1.15053e-114	0.179254	0.355521	0.643	0.605	1	0.179254	1.32276e-118
Uba52	1.98876e-59	0.656708	0.831	0.667	6.91928e-55	2.64437e-19	0.718226	0.57	0.547	9.20029e-15	1.06338e-117	0.768293	0.658	0.547	3.6997e-113	1.86833e-30	0.722206	0.992	0.937	6.50031e-26	2.64437e-19	4.25351e-117
Churc1	2.2832e-63	0.65302	0.55	0.375	7.94372e-59	6.72362e-11	0.759008	0.215	0.16	2.33928e-06	1.40833e-116	0.774796	0.446	0.308	4.89987e-112	2.40666e-09	0.494539	0.674	0.461	8.37324e-05	2.40666e-09	5.63333e-116
Rpl18	1.82918e-87	0.61408	0.998	0.943	6.36409e-83	6.52253e-12	0.472107	0.733	0.734	2.26932e-07	7.39096e-115	0.738689	0.976	0.916	2.57146e-110	5.87777e-40	0.760038	1	0.982	2.04499e-35	6.52253e-12	2.95638e-114
Eif3f	2.43147e-23	0.355483	0.939	0.848	8.45956e-19	1.21555e-12	0.284829	0.355	0.454	4.22913e-08	3.89445e-114	0.825338	0.824	0.69	1.35496e-109	3.31603e-15	0.491602	0.961	0.907	1.15371e-10	1.21555e-12	1.55778e-113
Nr3c1	3.51028e-62	0.720996	0.738	0.562	1.2213e-57	4.44332e-18	1.37415	0.302	0.12	1.54592e-13	7.30316e-114	0.980833	0.752	0.565	2.54092e-109	0.00297507	0.276322	0.698	0.601	1	0.00297507	2.92127e-113
Cd69	1.03849e-77	1.16816	0.648	0.292	3.6131e-73	2.54913e-34	1.98948	0.314	0.049	8.86893e-30	2.70832e-113	1.4149	0.585	0.227	9.42278e-109	1.21535e-39	1.17575	0.682	0.157	4.22843e-35	2.54913e-34	1.08333e-112
H2-Q7	2.411e-40	0.697468	0.757	0.551	8.38837e-36	1.08196e-14	1.07064	0.314	0.21	3.76435e-10	1.62097e-112	1.01141	0.834	0.627	5.63969e-108	3.79317e-09	0.580689	0.287	0.157	0.000131972	3.79317e-09	6.48389e-112
Rps2	6.33559e-109	0.755011	0.992	0.927	2.20428e-104	1.2442e-41	0.992105	0.831	0.737	4.3288e-37	3.97545e-50	0.498688	0.963	0.888	1.38314e-45	1.54617e-69	1.10491	1	0.969	5.37944e-65	1.2442e-41	2.53424e-108
Ythdc1	4.35469e-32	0.449702	0.487	0.429	1.51508e-27	3.16027e-20	1.2886	0.279	0.16	1.09952e-15	1.16888e-107	0.914383	0.621	0.527	4.06677e-103	0.00149216	0.265881	0.527	0.468	1	0.00149216	4.67552e-107
Nkg7	8.05281e-105	0.470982	0.588	0.187	2.80173e-100	5.48219e-29	1.53003	0.279	0.033	1.90736e-24	1.04874e-62	0.427364	0.248	0.046	3.64876e-58	3.73793e-19	0.771635	0.333	0.066	1.3005e-14	3.73793e-19	3.22112e-104
Jak1	1.51797e-32	0.451797	0.759	0.684	5.28134e-28	9.42348e-09	0.479138	0.203	0.22	0.000327862	1.45419e-102	0.790786	0.814	0.696	5.05941e-98	4.28573e-05	0.310232	0.798	0.701	1	4.28573e-05	5.81675e-102
Eif3h	7.0202e-36	0.480385	0.889	0.76	2.44247e-31	2.49431e-16	0.634311	0.302	0.317	8.6782e-12	1.2132e-97	0.70113	0.671	0.593	4.22097e-93	7.81892e-29	0.777907	0.946	0.85	2.72036e-24	2.49431e-16	4.8528e-97
Rps8	4.30629e-94	0.631623	0.998	0.964	1.49824e-89	1.42832e-09	0.395433	0.884	0.876	4.96942e-05	6.09467e-85	0.594649	0.985	0.971	2.12046e-80	1.57004e-48	0.809877	1	0.99	5.46249e-44	1.42832e-09	1.72251e-93
Rpl3	1.92036e-69	0.541611	0.997	0.91	6.68131e-65	2.63655e-12	0.542238	0.791	0.765	9.17307e-08	4.343e-93	0.695208	0.971	0.892	1.51102e-88	3.81015e-37	0.761256	0.984	0.961	1.32563e-32	2.63655e-12	1.7372e-92
Fgl2	3.88462e-91	1.07286	0.786	0.487	1.35154e-86	1.44508e-09	0.751057	0.244	0.202	5.02771e-05	5.02652e-25	0.47522	0.811	0.672	1.74883e-20	2.73225e-24	0.938229	0.651	0.31	9.50604e-20	1.44508e-09	1.55385e-90
Rpl37	9.23383e-31	0.318572	0.997	0.974	3.21263e-26	8.36118e-08	0.352253	0.907	0.908	0.00290902	1.12406e-90	0.649619	0.972	0.943	3.91081e-86	3.65322e-13	0.401312	1	0.994	1.27103e-08	8.36118e-08	4.49622e-90
Fosl2	1.10242e-14	0.252975	0.399	0.438	3.83555e-10	1.03924e-14	0.908746	0.494	0.419	3.61571e-10	2.13712e-89	1.02303	0.498	0.465	7.43546e-85	1.85255e-14	0.637886	0.791	0.514	6.4454e-10	1.85255e-14	8.54847e-89
Rps28	7.51213e-26	0.28202	0.993	0.945	2.61362e-21	8.08015e-13	0.426329	0.965	0.953	2.81124e-08	2.28962e-88	0.62211	0.979	0.951	7.96604e-84	6.5326e-19	0.49021	1	0.975	2.27282e-14	8.08015e-13	9.15847e-88
Fkbp3	8.05662e-79	0.829972	0.729	0.471	2.80306e-74	2.99683e-14	1.04492	0.227	0.097	1.04266e-09	3.4256e-88	0.757362	0.445	0.278	1.19183e-83	3.60233e-24	0.744598	0.822	0.587	1.25332e-19	2.99683e-14	1.37024e-87
Dad1	2.67421e-71	0.828618	0.857	0.716	9.30412e-67	6.88022e-40	1.48585	0.465	0.354	2.39377e-35	8.55704e-87	0.835497	0.744	0.688	2.97717e-82	3.24513e-34	0.89368	0.93	0.795	1.12904e-29	3.24513e-34	3.42282e-86
Rpl11	3.09173e-82	0.591553	0.992	0.939	1.07568e-77	7.59386e-17	0.582992	0.831	0.801	2.64205e-12	7.95934e-67	0.54758	0.977	0.924	2.76921e-62	1.55477e-33	0.674809	1	0.983	5.40937e-29	7.59386e-17	1.23669e-81
Gabarapl2	2.84498e-70	0.710404	0.762	0.584	9.89824e-66	9.12872e-13	0.920244	0.331	0.191	3.17606e-08	3.2462e-80	0.690635	0.537	0.383	1.12942e-75	1.11393e-06	0.379404	0.767	0.654	0.0387557	1.11393e-06	1.29848e-79
Rpl10a	1.33132e-63	0.524648	0.993	0.897	4.63192e-59	2.90706e-13	0.45156	0.645	0.674	1.01142e-08	5.03445e-80	0.676716	0.967	0.869	1.75159e-75	5.19927e-41	0.794075	0.992	0.967	1.80893e-36	2.90706e-13	2.01378e-79
Rplp0	2.62458e-78	0.59379	1	0.948	9.13145e-74	5.01801e-19	0.700134	0.86	0.802	1.74586e-14	4.23874e-74	0.587987	0.979	0.931	1.47474e-69	1.07627e-57	1.05783	1	0.986	3.74455e-53	5.01801e-19	1.04983e-77
Elf1	7.39161e-46	0.59946	0.719	0.575	2.57169e-41	2.95937e-10	1.0027	0.227	0.112	1.02962e-05	1.40977e-76	0.701791	0.679	0.554	4.90487e-72	5.01554e-08	0.45322	0.736	0.604	0.00174501	5.01554e-08	5.63907e-76
Rpl35a	4.00392e-30	0.301937	0.997	0.977	1.39304e-25	2.43614e-14	0.451066	0.913	0.928	8.47582e-10	3.69805e-75	0.533033	0.98	0.965	1.28663e-70	5.09858e-15	0.411233	1	0.989	1.7739e-10	2.43614e-14	1.47922e-74
Rpl29	3.74116e-74	0.593675	0.98	0.912	1.30162e-69	1.78783e-18	0.710152	0.581	0.546	6.22021e-14	7.29587e-47	0.532046	0.922	0.841	2.53838e-42	9.48611e-25	0.58169	0.992	0.962	3.30041e-20	1.78783e-18	1.49646e-73
Rpl15	2.02044e-73	0.581483	0.987	0.919	7.02953e-69	3.56973e-17	0.617263	0.645	0.633	1.24198e-12	8.70312e-32	0.418008	0.946	0.883	3.02799e-27	1.09977e-62	0.900535	1	0.975	3.82631e-58	3.56973e-17	8.08178e-73
Neurl3	2.59662e-59	0.908427	0.537	0.483	9.03417e-55	1.81468e-14	1.09234	0.209	0.129	6.31363e-10	8.7133e-73	1.06163	0.471	0.28	3.03153e-68	8.49213e-05	0.421888	0.488	0.328	1	8.49213e-05	3.48532e-72
Rpl41	2.42928e-57	0.442623	0.998	0.981	8.45196e-53	4.19477e-18	0.531176	0.988	0.972	1.45944e-13	1.43318e-72	0.54808	0.982	0.963	4.98632e-68	1.07572e-62	0.892435	1	0.993	3.74265e-58	4.19477e-18	5.73272e-72
Eif3m	8.64411e-28	0.388699	0.694	0.623	3.00746e-23	1.03614e-10	0.446474	0.18	0.205	3.60493e-06	6.52804e-72	0.536822	0.581	0.548	2.27124e-67	3.99349e-11	0.463832	0.868	0.727	1.38941e-06	1.03614e-10	2.61122e-71
Rps9	7.8003e-71	0.456169	0.997	0.993	2.71388e-66	3.55609e-09	0.352861	0.924	0.93	0.000123723	2.52695e-66	0.469275	0.987	0.988	8.79177e-62	1.81337e-33	0.599553	1	0.996	6.30907e-29	3.55609e-09	3.12012e-70
Sept11	1.53977e-63	0.740704	0.723	0.553	5.35718e-59	1.22436e-13	0.735644	0.273	0.251	4.25979e-09	1.96558e-28	0.369501	0.557	0.542	6.83864e-24	4.66665e-70	1.36666	0.837	0.344	1.62362e-65	1.22436e-13	1.86666e-69
Rps27a	1.49402e-69	0.448914	0.997	0.988	5.198e-65	1.76442e-06	0.291773	0.913	0.896	0.0613875	3.55316e-59	0.474846	0.982	0.962	1.23622e-54	4.57814e-29	0.569205	1	0.998	1.59282e-24	1.76442e-06	5.97609e-69
Rpl6	4.97622e-69	0.534614	0.995	0.943	1.73133e-64	2.61567e-10	0.48828	0.831	0.785	9.10044e-06	3.88652e-46	0.47219	0.966	0.922	1.3522e-41	1.99379e-33	0.653789	1	0.989	6.93681e-29	2.61567e-10	1.99049e-68
Hmgb1	9.66664e-41	0.43025	0.95	0.844	3.36322e-36	5.66108e-15	0.495661	0.424	0.497	1.9696e-10	1.82868e-68	0.694797	0.819	0.687	6.36234e-64	1.17696e-32	0.964443	0.969	0.914	4.09488e-28	5.66108e-15	7.31472e-68
Gnas	8.82645e-66	0.608957	0.953	0.85	3.0709e-61	2.14415e-12	0.601887	0.378	0.358	7.45992e-08	2.28098e-39	0.454479	0.743	0.694	7.93599e-35	1.16604e-31	0.725855	0.984	0.93	4.05689e-27	2.14415e-12	3.53058e-65
Aebp2	9.26323e-66	0.813896	0.633	0.358	3.22286e-61	5.05857e-21	1.5193	0.25	0.089	1.75998e-16	9.61816e-66	0.736392	0.603	0.483	3.34635e-61	7.57174e-31	0.824136	0.651	0.295	2.63436e-26	5.05857e-21	3.70529e-65
Nr4a1	1.14278e-26	0.760009	0.49	0.491	3.97594e-22	5.92477e-50	1.8984	0.616	0.283	2.06135e-45	1.27731e-65	1.28765	0.547	0.459	4.44402e-61	4.68984e-39	1.2062	0.969	0.639	1.63169e-34	1.14278e-26	5.10924e-65
Spcs2	2.83341e-62	0.667141	0.859	0.685	9.85801e-58	6.32337e-11	0.433231	0.256	0.291	2.20003e-06	2.74237e-30	0.313793	0.621	0.625	9.54125e-26	3.84943e-39	0.885042	0.938	0.812	1.33929e-34	6.32337e-11	1.13336e-61
Cbx3	4.32353e-23	0.400432	0.653	0.554	1.50424e-18	2.6469e-11	0.765657	0.267	0.238	9.20909e-07	1.25192e-61	0.620596	0.529	0.405	4.35569e-57	2.89667e-29	0.85543	0.853	0.609	1.00781e-24	2.6469e-11	5.00769e-61
Rbm39	7.04925e-32	0.418564	0.949	0.876	2.45258e-27	5.48925e-11	0.362477	0.459	0.507	1.90982e-06	2.08761e-61	0.57933	0.893	0.851	7.26321e-57	5.87992e-10	0.411434	0.946	0.886	2.04574e-05	5.87992e-10	8.35044e-61
Junb	1.7234e-09	0.632782	0.929	0.91	5.99607e-05	1.19423e-24	0.950798	0.855	0.767	4.15495e-20	2.79718e-60	1.04584	0.902	0.904	9.73193e-56	1.16e-15	0.748998	0.984	0.947	4.03588e-11	1.7234e-09	1.11887e-59
Rps25	2.75228e-24	0.288964	0.987	0.947	9.57573e-20	4.62283e-06	0.302564	0.797	0.805	0.160837	4.67633e-59	0.514601	0.972	0.921	1.62699e-54	1.65776e-08	0.303827	1	0.979	0.000576769	4.62283e-06	1.87053e-58
Prkar1a	2.10585e-37	0.48275	0.752	0.67	7.32667e-33	3.67797e-11	0.742031	0.314	0.265	1.27964e-06	3.20256e-58	0.528994	0.676	0.655	1.11424e-53	1.22307e-09	0.467499	0.837	0.719	4.2553e-05	1.22307e-09	1.28103e-57
Snrpg	1.35282e-26	0.397072	0.728	0.641	4.70675e-22	8.18214e-16	0.654883	0.506	0.488	2.84673e-11	4.91807e-57	0.551292	0.787	0.721	1.71109e-52	2.16048e-29	0.763976	0.946	0.767	7.51673e-25	8.18214e-16	1.96723e-56
Gadd45b	3.02278e-56	1.25246	0.568	0.51	1.05168e-51	4.22076e-33	1.50769	0.483	0.279	1.46849e-28	2.32503e-56	0.839819	0.59	0.663	8.08924e-52	8.86923e-35	1.33779	0.868	0.625	3.08578e-30	4.22076e-33	9.30012e-56
Npm1	2.2754e-34	0.420514	0.96	0.839	7.91657e-30	1.87868e-10	0.315916	0.453	0.513	6.5363e-06	1.61279e-26	0.372532	0.943	0.868	5.61122e-22	4.565e-54	1.06486	0.992	0.93	1.58825e-49	1.87868e-10	1.826e-53
Dusp5	4.63633e-31	0.817852	0.372	0.238	1.61307e-26	5.79825e-14	1.20456	0.285	0.168	2.01733e-09	2.99434e-53	0.991208	0.375	0.223	1.04179e-48	3.45324e-34	1.08945	0.806	0.323	1.20145e-29	5.79825e-14	1.19773e-52
Eef1g	8.9352e-53	0.574263	0.839	0.703	3.10873e-48	9.27197e-18	0.743436	0.448	0.406	3.22591e-13	4.7005e-36	0.46505	0.878	0.803	1.6354e-31	1.68672e-15	0.562578	0.884	0.799	5.86842e-11	1.68672e-15	3.57408e-52
Coq10b	5.56134e-21	0.297223	0.444	0.44	1.9349e-16	3.97286e-09	0.69696	0.215	0.189	0.000138224	9.18726e-53	0.46545	0.384	0.376	3.19643e-48	4.26522e-19	0.696162	0.729	0.395	1.48396e-14	3.97286e-09	3.6749e-52
Rpl22l1	4.83093e-38	0.558936	0.836	0.712	1.68078e-33	2.82741e-17	0.709283	0.576	0.565	9.83714e-13	9.44203e-53	0.603177	0.79	0.705	3.28507e-48	1.88241e-20	0.674515	0.977	0.865	6.54928e-16	2.82741e-17	3.77681e-52
Slc25a3	3.7288e-52	0.539653	0.942	0.838	1.29733e-47	5.64307e-19	0.687882	0.378	0.397	1.96334e-14	3.496e-20	0.293823	0.85	0.854	1.21633e-15	2.80723e-20	0.544491	0.961	0.939	9.76691e-16	5.64307e-19	1.49152e-51
Tnfaip3	4.97822e-36	0.80535	0.548	0.447	1.73202e-31	1.19171e-50	1.77392	0.622	0.313	4.14619e-46	1.72373e-36	0.764754	0.793	0.78	5.9972e-32	4.47375e-27	1.0292	0.822	0.437	1.55651e-22	4.47375e-27	4.76683e-50
Cnbp	4.23615e-47	0.522498	0.889	0.781	1.47384e-42	6.35981e-14	0.74591	0.331	0.292	2.21271e-09	1.79504e-50	0.530583	0.744	0.668	6.24531e-46	8.98855e-31	0.753624	0.953	0.864	3.1273e-26	6.35981e-14	7.18017e-50
Rpl35	3.88554e-38	0.464173	0.927	0.8	1.35186e-33	6.87182e-14	0.527945	0.948	0.901	2.39084e-09	2.13143e-49	0.542366	0.935	0.833	7.41567e-45	1.51696e-29	0.643376	1	0.964	5.27781e-25	6.87182e-14	8.52572e-49
Nabp1	7.89473e-26	0.379874	0.304	0.302	2.74673e-21	1.08195e-18	1.39957	0.285	0.127	3.76432e-14	1.42205e-47	0.603485	0.388	0.395	4.94758e-43	1.85e-06	0.388401	0.488	0.289	0.0643652	1.85e-06	5.68818e-47
Anp32a	3.02033e-32	0.412888	0.844	0.776	1.05083e-27	1.70729e-09	0.564513	0.326	0.311	5.94002e-05	1.14212e-45	0.458508	0.599	0.574	3.97367e-41	1.57335e-15	0.572599	0.93	0.853	5.47401e-11	1.70729e-09	4.56848e-45
Jund	4.37249e-07	0.486437	0.968	0.953	0.0152128	2.62662e-10	0.55991	0.831	0.839	9.13853e-06	1.95715e-44	0.643337	0.871	0.883	6.80933e-40	6.39073e-08	0.409566	0.984	0.974	0.00222346	4.37249e-07	7.82861e-44
H2-K1	7.72055e-43	0.509117	0.995	0.966	2.68614e-38	1.15147e-25	0.769546	0.767	0.775	4.00618e-21	1.28476e-43	0.409088	0.997	0.992	4.46992e-39	2.03677e-13	0.627899	0.953	0.929	7.08631e-09	2.03677e-13	5.13902e-43
Ndufv3	1.70088e-36	0.44017	0.641	0.566	5.91771e-32	1.40752e-09	0.538933	0.273	0.254	4.89704e-05	4.21859e-43	0.344593	0.458	0.478	1.46773e-38	3.0713e-06	0.364921	0.798	0.708	0.106857	3.0713e-06	1.68744e-42
Pim1	3.03673e-31	0.343367	0.532	0.655	1.05654e-26	3.10337e-08	0.586863	0.721	0.712	0.00107972	6.38971e-43	0.73592	0.733	0.681	2.22311e-38	4.89489e-18	0.673384	0.915	0.651	1.70303e-13	3.10337e-08	2.55588e-42
Rac2	7.1995e-43	0.376448	0.952	0.763	2.50485e-38	1.11495e-05	0.374686	0.308	0.299	0.387914	2.567e-19	0.329456	0.757	0.673	8.93109e-15	4.32137e-24	0.708737	0.969	0.901	1.50349e-19	1.11495e-05	2.8798e-42
Lsm4	1.45963e-31	0.423995	0.595	0.52	5.07833e-27	8.80298e-09	0.378422	0.203	0.229	0.000306273	3.34451e-41	0.251404	0.43	0.486	1.16362e-36	3.20062e-12	0.548258	0.814	0.657	1.11356e-07	8.80298e-09	1.3378e-40
Dnaja1	5.31679e-39	0.672821	0.846	0.795	1.84982e-34	2.79343e-14	0.808974	0.442	0.405	9.71892e-10	8.58184e-23	0.395978	0.754	0.813	2.98579e-18	1.43697e-33	0.867185	0.953	0.856	4.99951e-29	2.79343e-14	2.12672e-38
Rpl24	6.53337e-29	0.331872	0.987	0.933	2.27309e-24	3.23224e-06	0.304366	0.791	0.798	0.112456	1.5407e-35	0.405792	0.969	0.926	5.36041e-31	1.35933e-25	0.598583	1	0.981	4.72937e-21	3.23224e-06	6.16281e-35
Nfkbia	1.32775e-34	1.18991	0.847	0.766	4.61952e-30	4.0577e-25	1.07765	0.808	0.724	1.41176e-20	8.30258e-14	0.451947	0.91	0.954	2.88863e-09	2.64311e-14	0.7187	0.953	0.889	9.19592e-10	8.30258e-14	5.31101e-34
Rps17	3.20401e-29	0.374897	0.952	0.861	1.11474e-24	1.47677e-12	0.499614	0.727	0.732	5.13799e-08	4.79286e-34	0.436374	0.94	0.871	1.66753e-29	2.81114e-19	0.548327	0.969	0.942	9.78052e-15	1.47677e-12	1.91714e-33
Nr4a3	1.14402e-24	0.627654	0.208	0.124	3.98028e-20	8.78284e-26	1.75736	0.337	0.135	3.05573e-21	2.1926e-15	0.592598	0.246	0.166	7.6285e-11	2.71269e-07	0.306571	0.248	0.085	0.009438	2.71269e-07	3.51314e-25
Atp5h	2.01664e-23	0.346695	0.922	0.862	7.01629e-19	3.70534e-12	0.413445	0.494	0.547	1.28916e-07	2.52562e-16	0.260038	0.808	0.797	8.78712e-12	5.38439e-07	0.332259	0.977	0.922	0.0187334	5.38439e-07	8.06655e-23

[truncated: 9 more sheets: C10, C12, C13, C14, C15, C16, C17, C18, C19]
