# Supplementary material for: Tongue immune compartment analysis reveals spatial macrophage heterogeneity
Source: eLife. 2022 Jun 24;11:e77490. doi: 10.7554/eLife.77490 (PMC9232218; doi:10.7554/eLife.77490)
Supplement: Figure 1—source data 3. — Listed are the core gene signatures of cDC (tab 1), macrophages (tab 2), cDC1 (tab 3), and cDC2 (tab 4). The gene lists were derived from Gautier et al., 2012; Schlitzer et al., 2015. [file elife-77490-fig1-data3.xlsx]

## Sheet: cDC
Anpep

## Sheet: macrophages
Pecr

## Sheet: cDC1
P2ry14

## Sheet: cDC2
Dtx1
