# Supplementary material for: Tongue immune compartment analysis reveals spatial macrophage heterogeneity
Source: eLife. 2022 Jun 24;11:e77490. doi: 10.7554/eLife.77490 (PMC9232218; doi:10.7554/eLife.77490)
Supplement: Figure 1—source data 4. — Represented are the full GO lists for the myeloid clusters 0, 1, 3, 5, 6, 7, and 10. [file elife-77490-fig1-data4.xlsx]

## Sheet: Sheet1
183	C0	TRUE	2.23208e-06	773	83	17	0.204819	0.0219922	GO:0001944	GO:BP	vasculature development	21118	680
210	C0	TRUE	4.99374e-06	743	83	16	0.192771	0.0215343	GO:0001568	GO:BP	blood vessel development	21118	472
211	C0	TRUE	5.03411e-06	647	83	15	0.180723	0.0231839	GO:0048514	GO:BP	blood vessel morphogenesis	21118	14881
212	C0	TRUE	5.03411e-06	305	83	11	0.13253	0.0360656	GO:0045765	GO:BP	regulation of angiogenesis	21118	13533
216	C0	TRUE	5.63085e-06	310	83	11	0.13253	0.0354839	GO:1901342	GO:BP	regulation of vasculature development	21118	24619
240	C0	TRUE	1.02595e-05	12	83	4	0.0481928	0.333333	GO:1902947	GO:BP	regulation of tau-protein kinase activity	21118	26036
254	C0	TRUE	1.56758e-05	545	83	13	0.156627	0.0238532	GO:0001525	GO:BP	angiogenesis	21118	445
268	C0	TRUE	2.07781e-05	302	83	10	0.120482	0.0331126	GO:0010631	GO:BP	epithelial cell migration	21118	4789
269	C0	TRUE	2.07781e-05	230	83	9	0.108434	0.0391304	GO:0006898	GO:BP	receptor-mediated endocytosis	21118	2854
271	C0	TRUE	2.10795e-05	305	83	10	0.120482	0.0327869	GO:0090132	GO:BP	epithelium migration	21118	21209
275	C0	TRUE	2.31886e-05	311	83	10	0.120482	0.0321543	GO:0090130	GO:BP	tissue migration	21118	21207
277	C0	TRUE	2.33608e-05	238	83	9	0.108434	0.0378151	GO:0010632	GO:BP	regulation of epithelial cell migration	21118	4790
278	C0	TRUE	2.41873e-05	911	83	16	0.192771	0.0175631	GO:0035239	GO:BP	tube morphogenesis	21118	10284
317	C0	TRUE	5.04232e-05	436	83	11	0.13253	0.0252294	GO:0001667	GO:BP	ameboidal-type cell migration	21118	497
319	C0	TRUE	5.18286e-05	116	57	8	0.140351	0.0689655	KEGG:05150	KEGG	Staphylococcus aureus infection	8790	417
335	C0	TRUE	6.61066e-05	22	83	4	0.0481928	0.181818	GO:0048143	GO:BP	astrocyte activation	21118	14617
337	C0	TRUE	6.95554e-05	1137	83	17	0.204819	0.0149516	GO:0035295	GO:BP	tube development	21118	10319
341	C0	TRUE	7.30157e-05	663	83	13	0.156627	0.0196078	GO:0006897	GO:BP	endocytosis	21118	2853
342	C0	TRUE	7.43938e-05	23	83	4	0.0481928	0.173913	GO:0010759	GO:BP	positive regulation of macrophage chemotaxis	21118	4909
362	C0	TRUE	9.37328e-05	92	57	7	0.122807	0.076087	KEGG:04610	KEGG	Complement and coagulation cascades	8790	300
364	C0	TRUE	9.41397e-05	1174	83	17	0.204819	0.0144804	GO:0072359	GO:BP	circulatory system development	21118	20273
372	C0	TRUE	0.000107775	159	83	7	0.0843373	0.0440252	GO:0016482	GO:BP	cytosolic transport	21118	5840
388	C0	TRUE	0.000145098	109	83	6	0.0722892	0.0550459	GO:0046916	GO:BP	cellular transition metal ion homeostasis	21118	14489
393	C0	TRUE	0.00015429	29	83	4	0.0481928	0.137931	GO:1905523	GO:BP	positive regulation of macrophage migration	21118	28387
407	C0	TRUE	0.000173579	247	83	8	0.0963855	0.0323887	GO:1901215	GO:BP	negative regulation of neuron death	21118	24505
410	C0	TRUE	0.000177362	176	83	7	0.0843373	0.0397727	GO:0043524	GO:BP	negative regulation of neuron apoptotic process	21118	12424
413	C0	TRUE	0.000187246	31	83	4	0.0481928	0.129032	GO:0010758	GO:BP	regulation of macrophage chemotaxis	21118	4908
414	C0	TRUE	0.000187309	178	83	7	0.0843373	0.0393258	GO:0010594	GO:BP	regulation of endothelial cell migration	21118	4754
419	C0	TRUE	0.000200458	337	83	9	0.108434	0.0267062	GO:0007568	GO:BP	aging	21118	3444
422	C0	TRUE	0.000206755	256	83	8	0.0963855	0.03125	GO:0044403	GO:BP	biological process involved in symbiotic interaction	21118	12812
434	C0	TRUE	0.000226515	33	83	4	0.0481928	0.121212	GO:0071276	GO:BP	cellular response to cadmium ion	21118	19363
452	C0	TRUE	0.00026542	1165	83	16	0.192771	0.0137339	GO:0048646	GO:BP	anatomical structure formation involved in morphogenesis	21118	14992
453	C0	TRUE	0.000266267	35	83	4	0.0481928	0.114286	GO:0097242	GO:BP	amyloid-beta clearance	21118	21781
463	C0	TRUE	0.000293873	672	83	12	0.144578	0.0178571	GO:0030003	GO:BP	cellular cation homeostasis	21118	7690
464	C0	TRUE	0.000293903	916	83	14	0.168675	0.0152838	GO:0007167	GO:BP	enzyme linked receptor protein signaling pathway	21118	3080
470	C0	TRUE	0.000306684	198	83	7	0.0843373	0.0353535	GO:0071248	GO:BP	cellular response to metal ion	21118	19339
478	C0	TRUE	0.000338988	685	83	12	0.144578	0.0175182	GO:0006873	GO:BP	cellular ion homeostasis	21118	2829
485	C0	TRUE	0.000351022	2	83	2	0.0240964	1	GO:0035026	GO:BP	leading edge cell differentiation	21118	10115
488	C0	TRUE	0.000366284	136	83	6	0.0722892	0.0441176	GO:0055076	GO:BP	transition metal ion homeostasis	21118	16831
500	C0	TRUE	0.00044157	956	83	14	0.168675	0.0146444	GO:0019725	GO:BP	cellular homeostasis	21118	6957
501	C0	TRUE	0.000441925	41	83	4	0.0481928	0.097561	GO:0014002	GO:BP	astrocyte development	21118	5133
502	C0	TRUE	0.000441925	41	83	4	0.0481928	0.097561	GO:0048246	GO:BP	macrophage chemotaxis	21118	14682
517	C0	TRUE	0.000505699	217	83	7	0.0843373	0.0322581	GO:0031669	GO:BP	cellular response to nutrient levels	21118	8459
523	C0	TRUE	0.000520025	219	83	7	0.0843373	0.0319635	GO:0002573	GO:BP	myeloid leukocyte differentiation	21118	1226
527	C0	TRUE	0.000523092	608	83	11	0.13253	0.0180921	GO:0006875	GO:BP	cellular metal ion homeostasis	21118	2831
544	C0	TRUE	0.000621743	228	83	7	0.0843373	0.0307018	GO:0071241	GO:BP	cellular response to inorganic substance	21118	19332
546	C0	TRUE	0.000631132	870	83	13	0.156627	0.0149425	GO:0055082	GO:BP	cellular chemical homeostasis	21118	16836
551	C0	TRUE	0.000681304	232	83	7	0.0843373	0.0301724	GO:0031099	GO:BP	regeneration	21118	8173
555	C0	TRUE	0.000702226	755	83	12	0.144578	0.015894	GO:0055080	GO:BP	cation homeostasis	21118	16834
556	C0	TRUE	0.000702226	48	83	4	0.0481928	0.0833333	GO:0043618	GO:BP	regulation of transcription from RNA polymerase II promoter in response to stress	21118	12486
557	C0	TRUE	0.000702226	523	83	10	0.120482	0.0191205	GO:0031667	GO:BP	response to nutrient levels	21118	8457
570	C0	TRUE	0.000808423	53	57	5	0.0877193	0.0943396	KEGG:04978	KEGG	Mineral absorption	8790	387
571	C0	TRUE	0.000810125	768	83	12	0.144578	0.015625	GO:0098771	GO:BP	inorganic ion homeostasis	21118	22147
575	C0	TRUE	0.000823164	3	83	2	0.0240964	0.666667	GO:0002265	GO:BP	astrocyte activation involved in immune response	21118	929
582	C0	TRUE	0.00086306	332	83	8	0.0963855	0.0240964	GO:0062197	GO:BP	cellular response to chemical stress	21118	18634
590	C0	TRUE	0.000907847	52	83	4	0.0481928	0.0769231	GO:0043620	GO:BP	regulation of DNA-templated transcription in response to stress	21118	12488
591	C0	TRUE	0.000907847	52	83	4	0.0481928	0.0769231	GO:1902893	GO:BP	regulation of pri-miRNA transcription by RNA polymerase II	21118	25989
596	C0	TRUE	0.000962053	53	83	4	0.0481928	0.0754717	GO:0061614	GO:BP	pri-miRNA transcription by RNA polymerase II	21118	18336
620	C0	TRUE	0.00101836	669	83	11	0.13253	0.0164425	GO:0071363	GO:BP	cellular response to growth factor stimulus	21118	19448
621	C0	TRUE	0.00101979	252	83	7	0.0843373	0.0277778	GO:0031668	GO:BP	cellular response to extracellular stimulus	21118	8458
624	C0	TRUE	0.00105998	20	83	3	0.0361446	0.15	GO:0071280	GO:BP	cellular response to copper ion	21118	19367
625	C0	TRUE	0.00106198	55	83	4	0.0481928	0.0727273	GO:0071622	GO:BP	regulation of granulocyte chemotaxis	21118	19669
626	C0	TRUE	0.00106198	447	83	9	0.108434	0.0201342	GO:0006979	GO:BP	response to oxidative stress	21118	2921
629	C0	TRUE	0.0010852	559	83	10	0.120482	0.0178891	GO:0009991	GO:BP	response to extracellular stimulus	21118	4290
646	C0	TRUE	0.0012716	181	83	6	0.0722892	0.0331492	GO:0043112	GO:BP	receptor metabolic process	21118	12189
648	C0	TRUE	0.00129192	818	83	12	0.144578	0.0146699	GO:0050801	GO:BP	ion homeostasis	21118	15376
652	C0	TRUE	0.0013172	59	83	4	0.0481928	0.0677966	GO:0048260	GO:BP	positive regulation of receptor-mediated endocytosis	21118	14690
654	C0	TRUE	0.00133169	697	83	11	0.13253	0.0157819	GO:0070848	GO:BP	response to growth factor	21118	19148
660	C0	TRUE	0.00138617	4	83	2	0.0240964	0.5	GO:0071409	GO:BP	cellular response to cycloheximide	21118	19494
673	C0	TRUE	0.00147012	61	83	4	0.0481928	0.0655738	GO:0046686	GO:BP	response to cadmium ion	21118	14340
686	C0	TRUE	0.00163854	373	83	8	0.0963855	0.0214477	GO:0006959	GO:BP	humoral immune response	21118	2905
697	C0	TRUE	0.00177264	281	83	7	0.0843373	0.024911	GO:0034599	GO:BP	cellular response to oxidative stress	21118	10002
698	C0	TRUE	0.00177264	122	83	5	0.060241	0.0409836	GO:0016525	GO:BP	negative regulation of angiogenesis	21118	5845
710	C0	TRUE	0.00185793	25	83	3	0.0361446	0.12	GO:1903077	GO:BP	negative regulation of protein localization to plasma membrane	21118	26163
713	C0	TRUE	0.0018888	198	83	6	0.0722892	0.030303	GO:0071356	GO:BP	cellular response to tumor necrosis factor	21118	19441
718	C0	TRUE	0.00192918	125	83	5	0.060241	0.04	GO:2000181	GO:BP	negative regulation of blood vessel morphogenesis	21118	29383
719	C0	TRUE	0.00192918	125	83	5	0.060241	0.04	GO:0002761	GO:BP	regulation of myeloid leukocyte differentiation	21118	1405
724	C0	TRUE	0.00199313	126	83	5	0.060241	0.0396825	GO:1901343	GO:BP	negative regulation of vasculature development	21118	24620
725	C0	TRUE	0.00202418	26	83	3	0.0361446	0.115385	GO:0007263	GO:BP	nitric oxide mediated signal transduction	21118	3167
735	C0	TRUE	0.00210965	5	83	2	0.0240964	0.4	GO:0046898	GO:BP	response to cycloheximide	21118	14481
741	C0	TRUE	0.00216881	205	83	6	0.0722892	0.0292683	GO:0050679	GO:BP	positive regulation of epithelial cell proliferation	21118	15310
743	C0	TRUE	0.00218704	27	83	3	0.0361446	0.111111	GO:1904376	GO:BP	negative regulation of protein localization to cell periphery	21118	27327
745	C0	TRUE	0.00228213	131	83	5	0.060241	0.0381679	GO:0070555	GO:BP	response to interleukin-1	21118	18976
750	C0	TRUE	0.00238057	400	83	8	0.0963855	0.02	GO:0150063	GO:BP	visual system development	21118	23238
756	C0	TRUE	0.0025441	405	83	8	0.0963855	0.0197531	GO:0048880	GO:BP	sensory system development	21118	15213
758	C0	TRUE	0.00255526	1647	83	17	0.204819	0.0103218	GO:0045184	GO:BP	establishment of protein localization	21118	13203
800	C0	TRUE	0.00291043	6	83	2	0.0240964	0.333333	GO:1902949	GO:BP	positive regulation of tau-protein kinase activity	21118	26038
801	C0	TRUE	0.00291043	6	83	2	0.0240964	0.333333	GO:1990169	GO:BP	stress response to copper ion	21118	28850
802	C0	TRUE	0.00291043	6	83	2	0.0240964	0.333333	GO:0010273	GO:BP	detoxification of copper ion	21118	4537
829	C0	TRUE	0.00337637	32	83	3	0.0361446	0.09375	GO:0071402	GO:BP	cellular response to lipoprotein particle stimulus	21118	19487
837	C0	TRUE	0.00347691	322	83	7	0.0843373	0.0217391	GO:0071496	GO:BP	cellular response to external stimulus	21118	19573
864	C0	TRUE	0.00362634	33	83	3	0.0361446	0.0909091	GO:0046688	GO:BP	response to copper ion	21118	14342
865	C0	TRUE	0.00362634	33	83	3	0.0361446	0.0909091	GO:0007617	GO:BP	mating behavior	21118	3490
866	C0	TRUE	0.00362634	33	83	3	0.0361446	0.0909091	GO:1905476	GO:BP	negative regulation of protein localization to membrane	21118	28342
871	C0	TRUE	0.0038635	7	83	2	0.0240964	0.285714	GO:0071499	GO:BP	cellular response to laminar fluid shear stress	21118	19576
874	C0	TRUE	0.00390101	34	83	3	0.0361446	0.0882353	GO:0010574	GO:BP	regulation of vascular endothelial growth factor production	21118	4738
887	C0	TRUE	0.00408864	153	83	5	0.060241	0.0326797	GO:0010634	GO:BP	positive regulation of epithelial cell migration	21118	4792
889	C0	TRUE	0.00415084	335	83	7	0.0843373	0.0208955	GO:0016032	GO:BP	viral process	21118	5659
890	C0	TRUE	0.00415657	1409	83	15	0.180723	0.0106458	GO:0046907	GO:BP	intracellular transport	21118	14486
910	C0	TRUE	0.00446368	36	83	3	0.0361446	0.0833333	GO:0010039	GO:BP	response to iron ion	21118	4326
926	C0	TRUE	0.00465949	88	83	4	0.0481928	0.0454545	GO:0048708	GO:BP	astrocyte differentiation	21118	15053
933	C0	TRUE	0.00483944	8	83	2	0.0240964	0.25	GO:0072126	GO:BP	positive regulation of glomerular mesangial cell proliferation	21118	20052
947	C0	TRUE	0.00498544	161	83	5	0.060241	0.0310559	GO:0042542	GO:BP	response to hydrogen peroxide	21118	11850
948	C0	TRUE	0.0050027	90	83	4	0.0481928	0.0444444	GO:0051702	GO:BP	biological process involved in interaction with symbiont	21118	16098
949	C0	TRUE	0.00502394	38	83	3	0.0361446	0.0789474	GO:1904646	GO:BP	cellular response to amyloid-beta	21118	27570
950	C0	TRUE	0.00502394	349	83	7	0.0843373	0.0200573	GO:0043010	GO:BP	camera-type eye development	21118	12128
956	C0	TRUE	0.00529554	92	83	4	0.0481928	0.0434783	GO:0061097	GO:BP	regulation of protein tyrosine kinase activity	21118	17890
992	C0	TRUE	0.00572258	40	83	3	0.0361446	0.075	GO:0030225	GO:BP	macrophage differentiation	21118	7787
998	C0	TRUE	0.0058226	9	83	2	0.0240964	0.222222	GO:1905247	GO:BP	positive regulation of aspartic-type peptidase activity	21118	28126
999	C0	TRUE	0.0058226	9	83	2	0.0240964	0.222222	GO:0061687	GO:BP	detoxification of inorganic compound	21118	18369
1007	C0	TRUE	0.00600133	41	83	3	0.0361446	0.0731707	GO:1902895	GO:BP	positive regulation of pri-miRNA transcription by RNA polymerase II	21118	25991
1008	C0	TRUE	0.00600133	41	83	3	0.0361446	0.0731707	GO:0072583	GO:BP	clathrin-dependent endocytosis	21118	20403
1021	C0	TRUE	0.00628377	604	83	9	0.108434	0.0149007	GO:0007423	GO:BP	sensory organ development	21118	3310
1028	C0	TRUE	0.00647788	99	83	4	0.0481928	0.040404	GO:0007041	GO:BP	lysosomal transport	21118	2971
1033	C0	TRUE	0.00681368	10	83	2	0.0240964	0.2	GO:0061684	GO:BP	chaperone-mediated autophagy	21118	18368
1034	C0	TRUE	0.00681368	10	83	2	0.0240964	0.2	GO:1901724	GO:BP	positive regulation of cell proliferation involved in kidney development	21118	24959
1045	C0	TRUE	0.00696557	44	83	3	0.0361446	0.0681818	GO:0031670	GO:BP	cellular response to nutrient	21118	8460
1057	C0	TRUE	0.00717761	266	57	8	0.140351	0.0300752	KEGG:04144	KEGG	Endocytosis	8790	261
1062	C0	TRUE	0.0073152	103	83	4	0.0481928	0.038835	GO:0071347	GO:BP	cellular response to interleukin-1	21118	19432
1063	C0	TRUE	0.0073152	103	83	4	0.0481928	0.038835	GO:0046718	GO:BP	viral entry into host cell	21118	14363
1066	C0	TRUE	0.00734151	45	83	3	0.0361446	0.0666667	GO:0019098	GO:BP	reproductive behavior	21118	6476
1067	C0	TRUE	0.00734151	45	83	3	0.0361446	0.0666667	GO:1904645	GO:BP	response to amyloid-beta	21118	27569
1074	C0	TRUE	0.00772848	46	83	3	0.0361446	0.0652174	GO:0045429	GO:BP	positive regulation of nitric oxide biosynthetic process	21118	13281
1083	C0	TRUE	0.00796697	386	83	7	0.0843373	0.0181347	GO:0051098	GO:BP	regulation of binding	21118	15621
1084	C0	TRUE	0.00797977	11	83	2	0.0240964	0.181818	GO:0097501	GO:BP	stress response to metal ion	21118	21923
1085	C0	TRUE	0.00797977	11	83	2	0.0240964	0.181818	GO:0072124	GO:BP	regulation of glomerular mesangial cell proliferation	21118	20050
1089	C0	TRUE	0.00808264	47	83	3	0.0361446	0.0638298	GO:1904407	GO:BP	positive regulation of nitric oxide metabolic process	21118	27357
1090	C0	TRUE	0.00808264	107	83	4	0.0481928	0.0373832	GO:0044409	GO:BP	entry into host	21118	12817
1096	C0	TRUE	0.00820447	1535	83	15	0.180723	0.00977199	GO:0015031	GO:BP	protein transport	21118	5363
1112	C0	TRUE	0.00844842	48	83	3	0.0361446	0.0625	GO:1903670	GO:BP	regulation of sprouting angiogenesis	21118	26696
1115	C0	TRUE	0.00850242	109	83	4	0.0481928	0.0366972	GO:0048661	GO:BP	positive regulation of smooth muscle cell proliferation	21118	15007
1118	C0	TRUE	0.00865381	110	83	4	0.0481928	0.0363636	GO:0010595	GO:BP	positive regulation of endothelial cell migration	21118	4755
1119	C0	TRUE	0.00869618	49	83	3	0.0361446	0.0612245	GO:0043277	GO:BP	apoptotic cell clearance	21118	12257
1123	C0	TRUE	0.00877454	397	83	7	0.0843373	0.0176322	GO:0001654	GO:BP	eye development	21118	487
1124	C0	TRUE	0.00877454	12	83	2	0.0240964	0.166667	GO:1905245	GO:BP	regulation of aspartic-type peptidase activity	21118	28124
1125	C0	TRUE	0.00877454	12	83	2	0.0240964	0.166667	GO:1903332	GO:BP	regulation of protein folding	21118	26373
1126	C0	TRUE	0.00877454	12	83	2	0.0240964	0.166667	GO:0034375	GO:BP	high-density lipoprotein particle remodeling	21118	9902
1127	C0	TRUE	0.00877454	12	83	2	0.0240964	0.166667	GO:0071281	GO:BP	cellular response to iron ion	21118	19368
1128	C0	TRUE	0.00877454	12	83	2	0.0240964	0.166667	GO:0072110	GO:BP	glomerular mesangial cell proliferation	21118	20036
1129	C0	TRUE	0.00877454	12	83	2	0.0240964	0.166667	GO:0044764	GO:BP	multi-organism cellular process	21118	13017
1132	C0	TRUE	0.00883671	290	83	6	0.0722892	0.0206897	GO:0060070	GO:BP	canonical Wnt signaling pathway	21118	16936
1172	C0	TRUE	0.00985506	52	83	3	0.0361446	0.0576923	GO:0007618	GO:BP	mating	21118	3491
1175	C0	TRUE	0.00992331	116	83	4	0.0481928	0.0344828	GO:0048259	GO:BP	regulation of receptor-mediated endocytosis	21118	14689
1176	C0	TRUE	0.00992494	410	83	7	0.0843373	0.0170732	GO:0016055	GO:BP	Wnt signaling pathway	21118	5675
1177	C0	TRUE	0.00992494	13	83	2	0.0240964	0.153846	GO:1900272	GO:BP	negative regulation of long-term synaptic potentiation	21118	23581
1178	C0	TRUE	0.00992494	13	83	2	0.0240964	0.153846	GO:0034616	GO:BP	response to laminar fluid shear stress	21118	10011
1179	C0	TRUE	0.00992494	13	83	2	0.0240964	0.153846	GO:0002430	GO:BP	complement receptor mediated signaling pathway	21118	1085
1180	C0	TRUE	0.00992494	13	83	2	0.0240964	0.153846	GO:1902950	GO:BP	regulation of dendritic spine maintenance	21118	26039
1184	C0	TRUE	0.0101258	412	83	7	0.0843373	0.0169903	GO:0198738	GO:BP	cell-cell signaling by wnt	21118	23322
1189	C0	TRUE	0.0103824	302	83	6	0.0722892	0.0198675	GO:0030111	GO:BP	regulation of Wnt signaling pathway	21118	7731
1203	C0	TRUE	0.0106529	54	83	3	0.0361446	0.0555556	GO:1900271	GO:BP	regulation of long-term synaptic potentiation	21118	23580
1205	C0	TRUE	0.0108667	120	83	4	0.0481928	0.0333333	GO:0021782	GO:BP	glial cell development	21118	7342
1216	C0	TRUE	0.0112228	14	83	2	0.0240964	0.142857	GO:1905906	GO:BP	regulation of amyloid fibril formation	21118	28732
1217	C0	TRUE	0.0112228	14	83	2	0.0240964	0.142857	GO:0016322	GO:BP	neuron remodeling	21118	5803
1218	C0	TRUE	0.0113568	122	83	4	0.0481928	0.0327869	GO:0031623	GO:BP	receptor internalization	21118	8421
1228	C0	TRUE	0.0116712	123	83	4	0.0481928	0.0325203	GO:0098754	GO:BP	detoxification	21118	22132
1247	C0	TRUE	0.0120477	57	83	3	0.0361446	0.0526316	GO:0031103	GO:BP	axon regeneration	21118	8177
1262	C0	TRUE	0.0125319	15	83	2	0.0240964	0.133333	GO:0071294	GO:BP	cellular response to zinc ion	21118	19381
1263	C0	TRUE	0.0125319	15	83	2	0.0240964	0.133333	GO:1901722	GO:BP	regulation of cell proliferation involved in kidney development	21118	24957
1264	C0	TRUE	0.0125319	15	83	2	0.0240964	0.133333	GO:0001967	GO:BP	suckling behavior	21118	699
1265	C0	TRUE	0.0125319	15	83	2	0.0240964	0.133333	GO:0044794	GO:BP	positive regulation by host of viral process	21118	13039
1266	C0	TRUE	0.0125319	58	83	3	0.0361446	0.0517241	GO:0032731	GO:BP	positive regulation of interleukin-1 beta production	21118	9004
1281	C0	TRUE	0.0131178	1986	83	17	0.204819	0.00855992	GO:0071705	GO:BP	nitrogen compound transport	21118	19740
1282	C0	TRUE	0.0131178	128	83	4	0.0481928	0.03125	GO:0090090	GO:BP	negative regulation of canonical Wnt signaling pathway	21118	21171
1287	C0	TRUE	0.0131558	1810	83	16	0.192771	0.00883978	GO:0006508	GO:BP	proteolysis	21118	2496
1289	C0	TRUE	0.013382	129	83	4	0.0481928	0.0310078	GO:0052126	GO:BP	movement in host environment	21118	16397
1302	C0	TRUE	0.0139067	16	83	2	0.0240964	0.125	GO:0006895	GO:BP	Golgi to endosome transport	21118	2851
1305	C0	TRUE	0.0139703	131	83	4	0.0481928	0.0305344	GO:1903828	GO:BP	negative regulation of cellular protein localization	21118	26827
1361	C0	TRUE	0.0150556	134	83	4	0.0481928	0.0298507	GO:0002040	GO:BP	sprouting angiogenesis	21118	767
1366	C0	TRUE	0.0153146	17	83	2	0.0240964	0.117647	GO:0048268	GO:BP	clathrin coat assembly	21118	14697
1367	C0	TRUE	0.0153146	17	83	2	0.0240964	0.117647	GO:0090594	GO:BP	inflammatory response to wounding	21118	21564
1368	C0	TRUE	0.0153146	17	83	2	0.0240964	0.117647	GO:0072109	GO:BP	glomerular mesangium development	21118	20035
1370	C0	TRUE	0.0154408	227	83	5	0.060241	0.0220264	GO:0000302	GO:BP	response to reactive oxygen species	21118	132
1391	C0	TRUE	0.0164838	339	83	6	0.0722892	0.0176991	GO:0050890	GO:BP	cognition	21118	15451
1393	C0	TRUE	0.0165851	66	83	3	0.0361446	0.0454545	GO:0031102	GO:BP	neuron projection regeneration	21118	8176
1394	C0	TRUE	0.0165851	18	83	2	0.0240964	0.111111	GO:0006878	GO:BP	cellular copper ion homeostasis	21118	2834
1395	C0	TRUE	0.0165851	18	83	2	0.0240964	0.111111	GO:0035641	GO:BP	locomotory exploration behavior	21118	10553
1406	C0	TRUE	0.0171291	141	83	4	0.0481928	0.0283688	GO:0007034	GO:BP	vacuolar transport	21118	2965
1412	C0	TRUE	0.0174017	142	83	4	0.0481928	0.028169	GO:0046683	GO:BP	response to organophosphorus	21118	14337
1428	C0	TRUE	0.0178531	238	83	5	0.060241	0.0210084	GO:0007626	GO:BP	locomotory behavior	21118	3499
1429	C0	TRUE	0.0179085	19	83	2	0.0240964	0.105263	GO:2000641	GO:BP	regulation of early endosome to late endosome transport	21118	29829
1430	C0	TRUE	0.0179085	19	83	2	0.0240964	0.105263	GO:0071498	GO:BP	cellular response to fluid shear stress	21118	19575
1432	C0	TRUE	0.0179753	69	83	3	0.0361446	0.0434783	GO:0032835	GO:BP	glomerulus development	21118	9092
1433	C0	TRUE	0.0179753	69	83	3	0.0361446	0.0434783	GO:0032732	GO:BP	positive regulation of interleukin-1 production	21118	9005
1439	C0	TRUE	0.0184146	241	83	5	0.060241	0.0207469	GO:0060828	GO:BP	regulation of canonical Wnt signaling pathway	21118	17633
1442	C0	TRUE	0.0184402	146	83	4	0.0481928	0.0273973	GO:0019730	GO:BP	antimicrobial humoral response	21118	6960
1443	C0	TRUE	0.0184402	352	83	6	0.0722892	0.0170455	GO:0007178	GO:BP	transmembrane receptor protein serine/threonine kinase signaling pathway	21118	3090
1453	C0	TRUE	0.0190648	20	83	2	0.0240964	0.1	GO:0097062	GO:BP	dendritic spine maintenance	21118	21688
1454	C0	TRUE	0.0190648	20	83	2	0.0240964	0.1	GO:0055070	GO:BP	copper ion homeostasis	21118	16825
1455	C0	TRUE	0.0190648	20	83	2	0.0240964	0.1	GO:0045649	GO:BP	regulation of macrophage differentiation	21118	13423
1503	C0	TRUE	0.0198439	247	83	5	0.060241	0.0202429	GO:0019058	GO:BP	viral life cycle	21118	6440
1509	C0	TRUE	0.020635	21	83	2	0.0240964	0.0952381	GO:0072111	GO:BP	cell proliferation involved in kidney development	21118	20037
1510	C0	TRUE	0.020635	152	83	4	0.0481928	0.0263158	GO:0042552	GO:BP	myelination	21118	11860
1511	C0	TRUE	0.0207681	1746	83	15	0.180723	0.00859107	GO:0009890	GO:BP	negative regulation of biosynthetic process	21118	4223
1512	C0	TRUE	0.0209068	489	83	7	0.0843373	0.0143149	GO:0061564	GO:BP	axon development	21118	18307
1513	C0	TRUE	0.0209068	364	83	6	0.0722892	0.0164835	GO:0050878	GO:BP	regulation of body fluid levels	21118	15440
1514	C0	TRUE	0.0209068	251	83	5	0.060241	0.0199203	GO:0010001	GO:BP	glial cell differentiation	21118	4298
1532	C0	TRUE	0.0217229	155	83	4	0.0481928	0.0258065	GO:0007272	GO:BP	ensheathment of neurons	21118	3176
1533	C0	TRUE	0.0217229	155	83	4	0.0481928	0.0258065	GO:0008366	GO:BP	axon ensheathment	21118	3618
1539	C0	TRUE	0.0220384	156	83	4	0.0481928	0.025641	GO:0007613	GO:BP	memory	21118	3486
1540	C0	TRUE	0.0220384	156	83	4	0.0481928	0.025641	GO:0034614	GO:BP	cellular response to reactive oxygen species	21118	10010
1541	C0	TRUE	0.0220384	156	83	4	0.0481928	0.025641	GO:0030178	GO:BP	negative regulation of Wnt signaling pathway	21118	7750
1547	C0	TRUE	0.0225781	2897	83	21	0.253012	0.00724888	GO:0033036	GO:BP	macromolecule localization	21118	9231
1586	C0	TRUE	0.0229058	158	83	4	0.0481928	0.0253165	GO:0009267	GO:BP	cellular response to starvation	21118	3877
1589	C0	TRUE	0.0230028	500	83	7	0.0843373	0.014	GO:0008015	GO:BP	blood circulation	21118	3513
1685	C0	TRUE	0.023558	1	83	1	0.0120482	1	GO:0071506	GO:BP	cellular response to mycophenolic acid	21118	19583
1686	C0	TRUE	0.023558	1	83	1	0.0120482	1	GO:1905893	GO:BP	positive regulation of cellular response to thapsigargin	21118	28719
1687	C0	TRUE	0.023558	1	83	1	0.0120482	1	GO:1905896	GO:BP	positive regulation of cellular response to tunicamycin	21118	28722
1688	C0	TRUE	0.023558	23	83	2	0.0240964	0.0869565	GO:0010875	GO:BP	positive regulation of cholesterol efflux	21118	5009
1689	C0	TRUE	0.023558	1	83	1	0.0120482	1	GO:2000533	GO:BP	negative regulation of renal albumin absorption	21118	29724
1690	C0	TRUE	0.023558	1	83	1	0.0120482	1	GO:0072301	GO:BP	regulation of metanephric glomerular mesangial cell proliferation	21118	20227
1691	C0	TRUE	0.023558	1	83	1	0.0120482	1	GO:0072303	GO:BP	positive regulation of glomerular metanephric mesangial cell proliferation	21118	20229
1692	C0	TRUE	0.023558	1	83	1	0.0120482	1	GO:1905945	GO:BP	regulation of response to calcium ion	21118	28771
1693	C0	TRUE	0.023558	1	83	1	0.0120482	1	GO:1905673	GO:BP	positive regulation of lysosome organization	21118	28524
1694	C0	TRUE	0.023558	23	83	2	0.0240964	0.0869565	GO:0034368	GO:BP	protein-lipid complex remodeling	21118	9895
1695	C0	TRUE	0.023558	23	83	2	0.0240964	0.0869565	GO:0034369	GO:BP	plasma lipoprotein particle remodeling	21118	9896
1696	C0	TRUE	0.023558	1	83	1	0.0120482	1	GO:1904998	GO:BP	negative regulation of leukocyte adhesion to arterial endothelial cell	21118	27897
1697	C0	TRUE	0.023558	1	83	1	0.0120482	1	GO:1905237	GO:BP	response to cyclosporin A	21118	28116
1698	C0	TRUE	0.023558	1	83	1	0.0120482	1	GO:0071505	GO:BP	response to mycophenolic acid	21118	19582
1699	C0	TRUE	0.023558	1	83	1	0.0120482	1	GO:0010189	GO:BP	vitamin E biosynthetic process	21118	4462
1710	C0	TRUE	0.0243187	165	83	4	0.0481928	0.0242424	GO:0051701	GO:BP	biological process involved in interaction with host	21118	16097
1761	C0	TRUE	0.0251285	167	83	4	0.0481928	0.0239521	GO:0014074	GO:BP	response to purine-containing compound	21118	5203
1765	C0	TRUE	0.0252044	83	83	3	0.0361446	0.0361446	GO:0043954	GO:BP	cellular component maintenance	21118	12574
1767	C0	TRUE	0.0252663	25	83	2	0.0240964	0.08	GO:0034367	GO:BP	protein-containing complex remodeling	21118	9894
1768	C0	TRUE	0.0252663	25	83	2	0.0240964	0.08	GO:1990000	GO:BP	amyloid fibril formation	21118	28786
1801	C0	TRUE	0.0268781	526	83	7	0.0843373	0.013308	GO:0003013	GO:BP	circulatory system process	21118	1598
1802	C0	TRUE	0.0268782	26	83	2	0.0240964	0.0769231	GO:1902993	GO:BP	positive regulation of amyloid precursor protein catabolic process	21118	26081
1803	C0	TRUE	0.0268782	26	83	2	0.0240964	0.0769231	GO:0032816	GO:BP	positive regulation of natural killer cell activation	21118	9073
1804	C0	TRUE	0.0269448	527	83	7	0.0843373	0.0132827	GO:1905114	GO:BP	cell surface receptor signaling pathway involved in cell-cell signaling	21118	28000
1805	C0	TRUE	0.0269448	527	83	7	0.0843373	0.0132827	GO:1901615	GO:BP	organic hydroxy compound metabolic process	21118	24865
1806	C0	TRUE	0.0269829	172	83	4	0.0481928	0.0232558	GO:0006956	GO:BP	complement activation	21118	2902
1808	C0	TRUE	0.0272989	278	83	5	0.060241	0.0179856	GO:0010951	GO:BP	negative regulation of endopeptidase activity	21118	5083
1815	C0	TRUE	0.028189	27	83	2	0.0240964	0.0740741	GO:0007176	GO:BP	regulation of epidermal growth factor-activated receptor activity	21118	3089
1839	C0	TRUE	0.0289683	89	83	3	0.0361446	0.0337079	GO:0048678	GO:BP	response to axon injury	21118	15023
1865	C0	TRUE	0.0295891	2416	83	18	0.216867	0.00745033	GO:0071702	GO:BP	organic substance transport	21118	19737
1866	C0	TRUE	0.029608	28	83	2	0.0240964	0.0714286	GO:1900273	GO:BP	positive regulation of long-term synaptic potentiation	21118	23582
1867	C0	TRUE	0.029608	28	83	2	0.0240964	0.0714286	GO:0072012	GO:BP	glomerulus vasculature development	21118	19941
1868	C0	TRUE	0.029608	28	83	2	0.0240964	0.0714286	GO:0044788	GO:BP	modulation by host of viral process	21118	13034
1869	C0	TRUE	0.029608	28	83	2	0.0240964	0.0714286	GO:0006882	GO:BP	cellular zinc ion homeostasis	21118	2838
1870	C0	TRUE	0.029608	28	83	2	0.0240964	0.0714286	GO:0002092	GO:BP	positive regulation of receptor internalization	21118	805
1873	C0	TRUE	0.0300357	287	83	5	0.060241	0.0174216	GO:0010466	GO:BP	negative regulation of peptidase activity	21118	4660
1876	C0	TRUE	0.03025	91	83	3	0.0361446	0.032967	GO:0031100	GO:BP	animal organ regeneration	21118	8174
1893	C0	TRUE	0.0310099	92	83	3	0.0361446	0.0326087	GO:0001938	GO:BP	positive regulation of endothelial cell proliferation	21118	677
1894	C0	TRUE	0.0310884	29	83	2	0.0240964	0.0689655	GO:0055094	GO:BP	response to lipoprotein particle	21118	16846
1895	C0	TRUE	0.0310884	182	83	4	0.0481928	0.021978	GO:0061351	GO:BP	neural precursor cell proliferation	21118	18130
1911	C0	TRUE	0.0325176	30	83	2	0.0240964	0.0666667	GO:0055069	GO:BP	zinc ion homeostasis	21118	16824
1912	C0	TRUE	0.0325176	30	83	2	0.0240964	0.0666667	GO:0061440	GO:BP	kidney vasculature development	21118	18219
1913	C0	TRUE	0.0325176	30	83	2	0.0240964	0.0666667	GO:0061437	GO:BP	renal system vasculature development	21118	18216
1914	C0	TRUE	0.0325176	30	83	2	0.0240964	0.0666667	GO:0048169	GO:BP	regulation of long-term neuronal synaptic plasticity	21118	14639
1915	C0	TRUE	0.0325176	30	83	2	0.0240964	0.0666667	GO:1903649	GO:BP	regulation of cytoplasmic transport	21118	26675
1919	C0	TRUE	0.0328131	95	83	3	0.0361446	0.0315789	GO:0097061	GO:BP	dendritic spine organization	21118	21687
1927	C0	TRUE	0.0331752	187	83	4	0.0481928	0.0213904	GO:0007584	GO:BP	response to nutrient	21118	3459
1949	C0	TRUE	0.0334805	96	83	3	0.0361446	0.03125	GO:0006892	GO:BP	post-Golgi vesicle-mediated transport	21118	2848
1954	C0	TRUE	0.0341274	31	83	2	0.0240964	0.0645161	GO:0071295	GO:BP	cellular response to vitamin	21118	19382
1955	C0	TRUE	0.0341274	31	83	2	0.0240964	0.0645161	GO:0030511	GO:BP	positive regulation of transforming growth factor beta receptor signaling pathway	21118	7906
1956	C0	TRUE	0.0341274	31	83	2	0.0240964	0.0645161	GO:1903846	GO:BP	positive regulation of cellular response to transforming growth factor beta stimulus	21118	26842
1957	C0	TRUE	0.0342122	97	83	3	0.0361446	0.0309278	GO:0045638	GO:BP	negative regulation of myeloid cell differentiation	21118	13412
1996	C0	TRUE	0.0359961	32	83	2	0.0240964	0.0625	GO:0002021	GO:BP	response to dietary excess	21118	749
1997	C0	TRUE	0.0359961	32	83	2	0.0240964	0.0625	GO:0034405	GO:BP	response to fluid shear stress	21118	9926
2004	C0	TRUE	0.0361446	2	83	1	0.0120482	0.5	GO:0014740	GO:BP	negative regulation of muscle hyperplasia	21118	5240
2005	C0	TRUE	0.0361446	2	83	1	0.0120482	0.5	GO:0071874	GO:BP	cellular response to norepinephrine stimulus	21118	19835
2006	C0	TRUE	0.0361446	2	83	1	0.0120482	0.5	GO:0046687	GO:BP	response to chromate	21118	14341
2007	C0	TRUE	0.0361446	2	83	1	0.0120482	0.5	GO:0097324	GO:BP	melanocyte migration	21118	21836
2008	C0	TRUE	0.0361446	2	83	1	0.0120482	0.5	GO:0097532	GO:BP	stress response to acid chemical	21118	21932
2009	C0	TRUE	0.0361446	2	83	1	0.0120482	0.5	GO:0097018	GO:BP	renal albumin absorption	21118	21657
2010	C0	TRUE	0.0361446	2	83	1	0.0120482	0.5	GO:0061903	GO:BP	positive regulation of 1-phosphatidylinositol-3-kinase activity	21118	18480
2011	C0	TRUE	0.0361446	2	83	1	0.0120482	0.5	GO:1903056	GO:BP	regulation of melanosome organization	21118	26142
2012	C0	TRUE	0.0361446	2	83	1	0.0120482	0.5	GO:0032764	GO:BP	negative regulation of mast cell cytokine production	21118	9037
2013	C0	TRUE	0.0361446	2	83	1	0.0120482	0.5	GO:0072262	GO:BP	metanephric glomerular mesangial cell proliferation involved in metanephros development	21118	20188
2014	C0	TRUE	0.0361446	2	83	1	0.0120482	0.5	GO:0010877	GO:BP	lipid transport involved in lipid storage	21118	5011
2015	C0	TRUE	0.0361446	2	83	1	0.0120482	0.5	GO:0090386	GO:BP	phagosome maturation involved in apoptotic cell clearance	21118	21453
2016	C0	TRUE	0.0361446	33	83	2	0.0240964	0.0606061	GO:0035640	GO:BP	exploration behavior	21118	10552
2017	C0	TRUE	0.0361446	2	83	1	0.0120482	0.5	GO:0090387	GO:BP	phagolysosome assembly involved in apoptotic cell clearance	21118	21454
2018	C0	TRUE	0.0361446	2	83	1	0.0120482	0.5	GO:1904715	GO:BP	negative regulation of chaperone-mediated autophagy	21118	27635
2019	C0	TRUE	0.0361446	2	83	1	0.0120482	0.5	GO:0061901	GO:BP	regulation of 1-phosphatidylinositol-3-kinase activity	21118	18478
2020	C0	TRUE	0.0361446	2	83	1	0.0120482	0.5	GO:0061740	GO:BP	protein targeting to lysosome involved in chaperone-mediated autophagy	21118	18402
2021	C0	TRUE	0.0361446	2	83	1	0.0120482	0.5	GO:1903048	GO:BP	regulation of acetylcholine-gated cation channel activity	21118	26134
2022	C0	TRUE	0.0361446	2	83	1	0.0120482	0.5	GO:0097533	GO:BP	cellular stress response to acid chemical	21118	21933
2023	C0	TRUE	0.0361446	2	83	1	0.0120482	0.5	GO:0021767	GO:BP	mammillary body development	21118	7327
2024	C0	TRUE	0.0361446	2	83	1	0.0120482	0.5	GO:0038178	GO:BP	complement component C5a signaling pathway	21118	11272
2025	C0	TRUE	0.0361446	2	83	1	0.0120482	0.5	GO:1903407	GO:BP	negative regulation of P-type sodium:potassium-exchanging transporter activity	21118	26447
2026	C0	TRUE	0.0361446	2	83	1	0.0120482	0.5	GO:0071247	GO:BP	cellular response to chromate	21118	19338
2027	C0	TRUE	0.0361446	2	83	1	0.0120482	0.5	GO:0006542	GO:BP	glutamine biosynthetic process	21118	2528
2028	C0	TRUE	0.0361446	2	83	1	0.0120482	0.5	GO:2000642	GO:BP	negative regulation of early endosome to late endosome transport	21118	29830
2029	C0	TRUE	0.0361446	2	83	1	0.0120482	0.5	GO:1904022	GO:BP	positive regulation of G protein-coupled receptor internalization	21118	26996
2030	C0	TRUE	0.0361446	2	83	1	0.0120482	0.5	GO:0071307	GO:BP	cellular response to vitamin K	21118	19394
2031	C0	TRUE	0.0361446	2	83	1	0.0120482	0.5	GO:1905894	GO:BP	regulation of cellular response to tunicamycin	21118	28720
2032	C0	TRUE	0.0361446	2	83	1	0.0120482	0.5	GO:1900142	GO:BP	negative regulation of oligodendrocyte apoptotic process	21118	23461
2033	C0	TRUE	0.0361446	2	83	1	0.0120482	0.5	GO:1904472	GO:BP	positive regulation of endothelin production	21118	27415
2034	C0	TRUE	0.0361446	2	83	1	0.0120482	0.5	GO:0006788	GO:BP	heme oxidation	21118	2757
2035	C0	TRUE	0.0361446	2	83	1	0.0120482	0.5	GO:0033552	GO:BP	response to vitamin B3	21118	9545
2036	C0	TRUE	0.0361446	2	83	1	0.0120482	0.5	GO:1901631	GO:BP	positive regulation of presynaptic membrane organization	21118	24880
2037	C0	TRUE	0.0361446	103	83	3	0.0361446	0.0291262	GO:0033273	GO:BP	response to vitamin	21118	9359
2038	C0	TRUE	0.0361446	1208	83	11	0.13253	0.00910596	GO:0048666	GO:BP	neuron development	21118	15012
2039	C0	TRUE	0.0361446	33	83	2	0.0240964	0.0606061	GO:0048679	GO:BP	regulation of axon regeneration	21118	15024
2040	C0	TRUE	0.0361446	2	83	1	0.0120482	0.5	GO:0061373	GO:BP	mammillary axonal complex development	21118	18152
2041	C0	TRUE	0.0361446	2	83	1	0.0120482	0.5	GO:0051563	GO:BP	smooth endoplasmic reticulum calcium ion homeostasis	21118	15978
2042	C0	TRUE	0.0361446	2	83	1	0.0120482	0.5	GO:1905891	GO:BP	regulation of cellular response to thapsigargin	21118	28717
2043	C0	TRUE	0.0361446	103	83	3	0.0361446	0.0291262	GO:0051591	GO:BP	response to cAMP	21118	16000
2044	C0	TRUE	0.0361446	2	83	1	0.0120482	0.5	GO:1905908	GO:BP	positive regulation of amyloid fibril formation	21118	28734
2045	C0	TRUE	0.0361446	2	83	1	0.0120482	0.5	GO:0034395	GO:BP	regulation of transcription from RNA polymerase II promoter in response to iron	21118	9918
2046	C0	TRUE	0.0361446	2	83	1	0.0120482	0.5	GO:1902998	GO:BP	positive regulation of neurofibrillary tangle assembly	21118	26086
2047	C0	TRUE	0.0361446	102	83	3	0.0361446	0.0294118	GO:0106027	GO:BP	neuron projection organization	21118	22561
2048	C0	TRUE	0.0361446	2	83	1	0.0120482	0.5	GO:2000532	GO:BP	regulation of renal albumin absorption	21118	29723
2049	C0	TRUE	0.0361446	2	83	1	0.0120482	0.5	GO:0071231	GO:BP	cellular response to folic acid	21118	19322
2050	C0	TRUE	0.0361446	2	83	1	0.0120482	0.5	GO:0150064	GO:BP	vertebrate eye-specific patterning	21118	23239
2051	C0	TRUE	0.0361446	2	83	1	0.0120482	0.5	GO:1902748	GO:BP	positive regulation of lens fiber cell differentiation	21118	25856
2052	C0	TRUE	0.0361873	34	83	2	0.0240964	0.0588235	GO:0010803	GO:BP	regulation of tumor necrosis factor-mediated signaling pathway	21118	4952
2116	C0	TRUE	0.0373342	201	83	4	0.0481928	0.0199005	GO:0042594	GO:BP	response to starvation	21118	11871
2117	C0	TRUE	0.037446	105	83	3	0.0361446	0.0285714	GO:0060291	GO:BP	long-term synaptic potentiation	21118	17118
2127	C0	TRUE	0.0377005	35	83	2	0.0240964	0.0571429	GO:0070306	GO:BP	lens fiber cell differentiation	21118	18837
2128	C0	TRUE	0.0377005	35	83	2	0.0240964	0.0571429	GO:0051968	GO:BP	positive regulation of synaptic transmission, glutamatergic	21118	16275
2129	C0	TRUE	0.0377005	893	83	9	0.108434	0.0100784	GO:0009894	GO:BP	regulation of catabolic process	21118	4227
2220	C0	TRUE	0.0393381	36	83	2	0.0240964	0.0555556	GO:0050931	GO:BP	pigment cell differentiation	21118	15490
2221	C0	TRUE	0.0393381	36	83	2	0.0240964	0.0555556	GO:0071827	GO:BP	plasma lipoprotein particle organization	21118	19803
2222	C0	TRUE	0.0393381	36	83	2	0.0240964	0.0555556	GO:0071354	GO:BP	cellular response to interleukin-6	21118	19439
2235	C0	TRUE	0.0400011	207	83	4	0.0481928	0.0193237	GO:0008217	GO:BP	regulation of blood pressure	21118	3571
2237	C0	TRUE	0.0403544	109	83	3	0.0361446	0.0275229	GO:0070301	GO:BP	cellular response to hydrogen peroxide	21118	18832
2266	C0	TRUE	0.0409268	37	83	2	0.0240964	0.0540541	GO:0070570	GO:BP	regulation of neuron projection regeneration	21118	18982
2281	C0	TRUE	0.0420241	111	83	3	0.0361446	0.027027	GO:0061844	GO:BP	antimicrobial humoral immune response mediated by antimicrobial peptide	21118	18445
2282	C0	TRUE	0.042196	1606	83	13	0.156627	0.00809465	GO:0045934	GO:BP	negative regulation of nucleobase-containing compound metabolic process	21118	13686
2293	C0	TRUE	0.0426482	38	83	2	0.0240964	0.0526316	GO:1903580	GO:BP	positive regulation of ATP metabolic process	21118	26607
2294	C0	TRUE	0.0426482	1253	83	11	0.13253	0.00877893	GO:0045944	GO:BP	positive regulation of transcription by RNA polymerase II	21118	13695
2295	C0	TRUE	0.0426813	112	83	3	0.0361446	0.0267857	GO:0009408	GO:BP	response to heat	21118	3926
2363	C0	TRUE	0.0435494	1616	83	13	0.156627	0.00804455	GO:0045893	GO:BP	positive regulation of transcription, DNA-templated	21118	13647
2364	C0	TRUE	0.0435494	214	83	4	0.0481928	0.0186916	GO:0043393	GO:BP	regulation of protein binding	21118	12328
2365	C0	TRUE	0.0435494	1616	83	13	0.156627	0.00804455	GO:1903508	GO:BP	positive regulation of nucleic acid-templated transcription	21118	26537
2366	C0	TRUE	0.0435494	214	83	4	0.0481928	0.0186916	GO:0048167	GO:BP	regulation of synaptic plasticity	21118	14637
2367	C0	TRUE	0.0436992	1617	83	13	0.156627	0.00803958	GO:1902680	GO:BP	positive regulation of RNA biosynthetic process	21118	25803
2369	C0	TRUE	0.0440685	114	83	3	0.0361446	0.0263158	GO:1901655	GO:BP	cellular response to ketone	21118	24902
2370	C0	TRUE	0.0440685	39	83	2	0.0240964	0.0512821	GO:0045022	GO:BP	early endosome to late endosome transport	21118	13119
2385	C0	TRUE	0.0452168	217	83	4	0.0481928	0.0184332	GO:0016197	GO:BP	endosomal transport	21118	5763
2391	C0	TRUE	0.0458679	40	83	2	0.0240964	0.05	GO:0090049	GO:BP	regulation of cell migration involved in sprouting angiogenesis	21118	21132
2392	C0	TRUE	0.0458679	40	83	2	0.0240964	0.05	GO:0033059	GO:BP	cellular pigmentation	21118	9248
2393	C0	TRUE	0.0458679	40	83	2	0.0240964	0.05	GO:0071825	GO:BP	protein-lipid complex subunit organization	21118	19801
2411	C0	TRUE	0.0464639	3	83	1	0.0120482	0.333333	GO:0061084	GO:BP	negative regulation of protein refolding	21118	17877
2412	C0	TRUE	0.0464639	3	83	1	0.0120482	0.333333	GO:0060086	GO:BP	circadian temperature homeostasis	21118	16949
2413	C0	TRUE	0.0464639	3	83	1	0.0120482	0.333333	GO:0097017	GO:BP	renal protein absorption	21118	21656
2414	C0	TRUE	0.0464639	118	83	3	0.0361446	0.0254237	GO:0051101	GO:BP	regulation of DNA binding	21118	15624
2415	C0	TRUE	0.0464639	3	83	1	0.0120482	0.333333	GO:0032487	GO:BP	regulation of Rap protein signal transduction	21118	8818
2416	C0	TRUE	0.0464639	3	83	1	0.0120482	0.333333	GO:1990775	GO:BP	endothelin production	21118	29090
2417	C0	TRUE	0.0464639	3	83	1	0.0120482	0.333333	GO:2000182	GO:BP	regulation of progesterone biosynthetic process	21118	29384
2418	C0	TRUE	0.0464639	3	83	1	0.0120482	0.333333	GO:0070676	GO:BP	intralumenal vesicle formation	21118	19058
2419	C0	TRUE	0.0464639	41	83	2	0.0240964	0.0487805	GO:0070741	GO:BP	response to interleukin-6	21118	19084
2420	C0	TRUE	0.0464639	3	83	1	0.0120482	0.333333	GO:0072223	GO:BP	metanephric glomerular mesangium development	21118	20149
2421	C0	TRUE	0.0464639	3	83	1	0.0120482	0.333333	GO:0071211	GO:BP	protein targeting to vacuole involved in autophagy	21118	19303
2422	C0	TRUE	0.0464639	3	83	1	0.0120482	0.333333	GO:0071403	GO:BP	cellular response to high density lipoprotein particle stimulus	21118	19488
2423	C0	TRUE	0.0464639	3	83	1	0.0120482	0.333333	GO:0019676	GO:BP	ammonia assimilation cycle	21118	6919
2424	C0	TRUE	0.0464639	3	83	1	0.0120482	0.333333	GO:0019064	GO:BP	fusion of virus membrane with host plasma membrane	21118	6445
2425	C0	TRUE	0.0464639	3	83	1	0.0120482	0.333333	GO:0035702	GO:BP	monocyte homeostasis	21118	10598
2426	C0	TRUE	0.0464639	3	83	1	0.0120482	0.333333	GO:0014005	GO:BP	microglia development	21118	5136
2427	C0	TRUE	0.0464639	3	83	1	0.0120482	0.333333	GO:0070370	GO:BP	cellular heat acclimation	21118	18873
2428	C0	TRUE	0.0464639	3	83	1	0.0120482	0.333333	GO:0032805	GO:BP	positive regulation of low-density lipoprotein particle receptor catabolic process	21118	9067
2429	C0	TRUE	0.0464639	3	83	1	0.0120482	0.333333	GO:1902996	GO:BP	regulation of neurofibrillary tangle assembly	21118	26084
2430	C0	TRUE	0.0464639	3	83	1	0.0120482	0.333333	GO:1902988	GO:BP	neurofibrillary tangle assembly	21118	26076
2431	C0	TRUE	0.0464639	3	83	1	0.0120482	0.333333	GO:0039663	GO:BP	membrane fusion involved in viral entry into host cell	21118	11436
2432	C0	TRUE	0.0464639	3	83	1	0.0120482	0.333333	GO:0044800	GO:BP	multi-organism membrane fusion	21118	13041
2433	C0	TRUE	0.0464639	41	83	2	0.0240964	0.0487805	GO:0007616	GO:BP	long-term memory	21118	3489
2434	C0	TRUE	0.0464639	3	83	1	0.0120482	0.333333	GO:0006117	GO:BP	acetaldehyde metabolic process	21118	2154
2435	C0	TRUE	0.0464639	3	83	1	0.0120482	0.333333	GO:1903650	GO:BP	negative regulation of cytoplasmic transport	21118	26676
2436	C0	TRUE	0.0464639	3	83	1	0.0120482	0.333333	GO:1904577	GO:BP	cellular response to tunicamycin	21118	27508
2437	C0	TRUE	0.0464639	3	83	1	0.0120482	0.333333	GO:1904576	GO:BP	response to tunicamycin	21118	27507
2438	C0	TRUE	0.0464639	3	83	1	0.0120482	0.333333	GO:1904470	GO:BP	regulation of endothelin production	21118	27413
2439	C0	TRUE	0.0464639	3	83	1	0.0120482	0.333333	GO:0005997	GO:BP	xylulose metabolic process	21118	2040
2440	C0	TRUE	0.0464639	3	83	1	0.0120482	0.333333	GO:0002605	GO:BP	negative regulation of dendritic cell antigen processing and presentation	21118	1258
2441	C0	TRUE	0.0464639	3	83	1	0.0120482	0.333333	GO:1900141	GO:BP	regulation of oligodendrocyte apoptotic process	21118	23460
2442	C0	TRUE	0.0464639	3	83	1	0.0120482	0.333333	GO:0098759	GO:BP	cellular response to interleukin-8	21118	22137
2443	C0	TRUE	0.0464639	3	83	1	0.0120482	0.333333	GO:1901629	GO:BP	regulation of presynaptic membrane organization	21118	24878
2444	C0	TRUE	0.0464639	3	83	1	0.0120482	0.333333	GO:0003104	GO:BP	positive regulation of glomerular filtration	21118	1688
2445	C0	TRUE	0.0464639	3	83	1	0.0120482	0.333333	GO:0098758	GO:BP	response to interleukin-8	21118	22136
2446	C0	TRUE	0.0464639	3	83	1	0.0120482	0.333333	GO:0042360	GO:BP	vitamin E metabolic process	21118	11731
2447	C0	TRUE	0.0464639	1643	83	13	0.156627	0.00791236	GO:0010558	GO:BP	negative regulation of macromolecule biosynthetic process	21118	4722
2448	C0	TRUE	0.0465773	42	83	2	0.0240964	0.047619	GO:0071398	GO:BP	cellular response to fatty acid	21118	19483
2449	C0	TRUE	0.0465773	42	83	2	0.0240964	0.047619	GO:0045981	GO:BP	positive regulation of nucleotide metabolic process	21118	13731
2450	C0	TRUE	0.0465773	42	83	2	0.0240964	0.047619	GO:1900544	GO:BP	positive regulation of purine nucleotide metabolic process	21118	23846
2451	C0	TRUE	0.0465773	42	83	2	0.0240964	0.047619	GO:0098927	GO:BP	vesicle-mediated transport between endosomal compartments	21118	22229
2452	C0	TRUE	0.0465773	42	83	2	0.0240964	0.047619	GO:0032814	GO:BP	regulation of natural killer cell activation	21118	9071
2528	C0	TRUE	0.0482788	43	83	2	0.0240964	0.0465116	GO:0042311	GO:BP	vasodilation	21118	11695
213	C1	TRUE	5.30383e-06	113	32	6	0.1875	0.0530973	GO:0071675	GO:BP	regulation of mononuclear cell migration	21118	19715
220	C1	TRUE	6.25579e-06	59	32	5	0.15625	0.0847458	GO:0002548	GO:BP	monocyte chemotaxis	21118	1201
237	C1	TRUE	9.64735e-06	69	32	5	0.15625	0.0724638	GO:0071677	GO:BP	positive regulation of mononuclear cell migration	21118	19717
245	C1	TRUE	1.2022e-05	29	32	4	0.125	0.137931	GO:0097066	GO:BP	response to thyroid hormone	21118	21691
365	C1	TRUE	9.51086e-05	600	32	8	0.25	0.0133333	GO:0032870	GO:BP	cellular response to hormone stimulus	21118	9100
377	C1	TRUE	0.000113169	19	32	3	0.09375	0.157895	GO:0097067	GO:BP	cellular response to thyroid hormone stimulus	21118	21692
400	C1	TRUE	0.000160426	22	32	3	0.09375	0.136364	GO:0090026	GO:BP	positive regulation of monocyte chemotaxis	21118	21112
411	C1	TRUE	0.000177795	170	32	5	0.15625	0.0294118	GO:0042129	GO:BP	regulation of T cell proliferation	21118	11587
468	C1	TRUE	0.000300144	28	32	3	0.09375	0.107143	GO:0090025	GO:BP	regulation of monocyte chemotaxis	21118	21111
495	C1	TRUE	0.000410309	1616	32	11	0.34375	0.00680693	GO:0048585	GO:BP	negative regulation of response to stimulus	21118	14942
790	C1	TRUE	0.00283933	790	32	7	0.21875	0.00886076	GO:0044257	GO:BP	cellular protein catabolic process	21118	12738
867	C1	TRUE	0.00365206	14	32	2	0.0625	0.142857	GO:1903977	GO:BP	positive regulation of glial cell migration	21118	26959
905	C1	TRUE	0.00442731	16	32	2	0.0625	0.125	GO:1905146	GO:BP	lysosomal protein catabolic process	21118	28029
946	C1	TRUE	0.00496435	216	32	4	0.125	0.0185185	GO:0010810	GO:BP	regulation of cell-substrate adhesion	21118	4957
955	C1	TRUE	0.00528914	89	32	3	0.09375	0.0337079	GO:0007044	GO:BP	cell-substrate junction assembly	21118	2974
962	C1	TRUE	0.00535244	18	32	2	0.0625	0.111111	GO:0007039	GO:BP	protein catabolic process in the vacuole	21118	2969
1012	C1	TRUE	0.00605098	95	32	3	0.09375	0.0315789	GO:0150115	GO:BP	cell-substrate junction organization	21118	23272
1022	C1	TRUE	0.00636406	97	32	3	0.09375	0.0309278	GO:0042102	GO:BP	positive regulation of T cell proliferation	21118	11571
1056	C1	TRUE	0.0071561	22	32	2	0.0625	0.0909091	GO:0002474	GO:BP	antigen processing and presentation of peptide antigen via MHC class I	21118	1129
1094	C1	TRUE	0.00818609	110	32	3	0.09375	0.0272727	GO:1905954	GO:BP	positive regulation of lipid localization	21118	28778
1116	C1	TRUE	0.00861259	113	32	3	0.09375	0.0265487	GO:1903076	GO:BP	regulation of protein localization to plasma membrane	21118	26162
1219	C1	TRUE	0.0113608	128	32	3	0.09375	0.0234375	GO:0010811	GO:BP	positive regulation of cell-substrate adhesion	21118	4958
1242	C1	TRUE	0.0118313	1085	32	7	0.21875	0.00645161	GO:0044265	GO:BP	cellular macromolecule catabolic process	21118	12743
1258	C1	TRUE	0.0123784	32	32	2	0.0625	0.0625	GO:0030574	GO:BP	collagen catabolic process	21118	7926
1296	C1	TRUE	0.0134867	139	32	3	0.09375	0.0215827	GO:1904375	GO:BP	regulation of protein localization to cell periphery	21118	27326
1325	C1	TRUE	0.0143728	1	32	1	0.03125	1	GO:0052417	GO:BP	metabolism by host of symbiont protein	21118	16605
1326	C1	TRUE	0.0143728	1	32	1	0.03125	1	GO:0052418	GO:BP	metabolism by organism of protein in other organism involved in symbiotic interaction	21118	16606
1327	C1	TRUE	0.0143728	1	32	1	0.03125	1	GO:0021572	GO:BP	rhombomere 6 development	21118	7136
1328	C1	TRUE	0.0143728	1	32	1	0.03125	1	GO:0021599	GO:BP	abducens nerve formation	21118	7162
1329	C1	TRUE	0.0143728	1	32	1	0.03125	1	GO:1905597	GO:BP	positive regulation of low-density lipoprotein particle receptor binding	21118	28451
1330	C1	TRUE	0.0143728	1	32	1	0.03125	1	GO:0035705	GO:BP	T-helper 17 cell chemotaxis	21118	10601
1331	C1	TRUE	0.0143728	1	32	1	0.03125	1	GO:1905572	GO:BP	ganglioside GM1 transport to membrane	21118	28432
1332	C1	TRUE	0.0143728	1	32	1	0.03125	1	GO:0021598	GO:BP	abducens nerve morphogenesis	21118	7161
1333	C1	TRUE	0.0143728	1	32	1	0.03125	1	GO:0021560	GO:BP	abducens nerve development	21118	7124
1334	C1	TRUE	0.0143728	1	32	1	0.03125	1	GO:0052363	GO:BP	catabolism by organism of protein in other organism involved in symbiotic interaction	21118	16564
1335	C1	TRUE	0.0143728	1	32	1	0.03125	1	GO:0043310	GO:BP	negative regulation of eosinophil degranulation	21118	12279
1336	C1	TRUE	0.0143728	1	32	1	0.03125	1	GO:0044145	GO:BP	modulation of formation of structure involved in a symbiotic process	21118	12707
1337	C1	TRUE	0.0143728	37	32	2	0.0625	0.0540541	GO:0032376	GO:BP	positive regulation of cholesterol transport	21118	8749
1338	C1	TRUE	0.0143728	1	32	1	0.03125	1	GO:2000464	GO:BP	positive regulation of astrocyte chemotaxis	21118	29661
1339	C1	TRUE	0.0143728	1	32	1	0.03125	1	GO:0044147	GO:BP	negative regulation of formation of structure involved in a symbiotic process	21118	12709
1340	C1	TRUE	0.0143728	37	32	2	0.0625	0.0540541	GO:0032373	GO:BP	positive regulation of sterol transport	21118	8746
1341	C1	TRUE	0.0143728	1	32	1	0.03125	1	GO:1903771	GO:BP	positive regulation of beta-galactosidase activity	21118	26777
1342	C1	TRUE	0.0143728	1	32	1	0.03125	1	GO:0002470	GO:BP	plasmacytoid dendritic cell antigen processing and presentation	21118	1125
1343	C1	TRUE	0.0143728	1	32	1	0.03125	1	GO:1902721	GO:BP	negative regulation of prolactin secretion	21118	25833
1344	C1	TRUE	0.0143728	1	32	1	0.03125	1	GO:0014739	GO:BP	positive regulation of muscle hyperplasia	21118	5239
1345	C1	TRUE	0.0143728	1	32	1	0.03125	1	GO:0002462	GO:BP	tolerance induction to nonself antigen	21118	1117
1346	C1	TRUE	0.0143728	1	32	1	0.03125	1	GO:0052362	GO:BP	catabolism by host of symbiont protein	21118	16563
1354	C1	TRUE	0.0147284	39	32	2	0.0625	0.0512821	GO:0046627	GO:BP	negative regulation of insulin receptor signaling pathway	21118	14287
1363	C1	TRUE	0.0151106	157	32	3	0.09375	0.0191083	GO:0046631	GO:BP	alpha-beta T cell activation	21118	14291
1372	C1	TRUE	0.0158448	42	32	2	0.0625	0.047619	GO:1900077	GO:BP	negative regulation of cellular response to insulin stimulus	21118	23396
1409	C1	TRUE	0.0173132	45	32	2	0.0625	0.0444444	GO:0071709	GO:BP	membrane assembly	21118	19744
1457	C1	TRUE	0.0192299	179	32	3	0.09375	0.0167598	GO:0030902	GO:BP	hindbrain development	21118	8071
1466	C1	TRUE	0.0195393	382	32	4	0.125	0.0104712	GO:0001655	GO:BP	urogenital system development	21118	488
1469	C1	TRUE	0.0196025	2	32	1	0.03125	0.5	GO:0002436	GO:BP	immune complex clearance by monocytes and macrophages	21118	1091
1470	C1	TRUE	0.0196025	2	32	1	0.03125	0.5	GO:0052361	GO:BP	catabolism by organism of macromolecule in other organism involved in symbiotic interaction	21118	16562
1471	C1	TRUE	0.0196025	2	32	1	0.03125	0.5	GO:2000473	GO:BP	positive regulation of hematopoietic stem cell migration	21118	29670
1472	C1	TRUE	0.0196025	401	32	4	0.125	0.00997506	GO:0006869	GO:BP	lipid transport	21118	2828
1473	C1	TRUE	0.0196025	2	32	1	0.03125	0.5	GO:0052214	GO:BP	metabolism of substance in other organism involved in symbiotic interaction	21118	16481
1474	C1	TRUE	0.0196025	2	32	1	0.03125	0.5	GO:0032804	GO:BP	negative regulation of low-density lipoprotein particle receptor catabolic process	21118	9066
1475	C1	TRUE	0.0196025	2	32	1	0.03125	0.5	GO:0006683	GO:BP	galactosylceramide catabolic process	21118	2664
1476	C1	TRUE	0.0196025	2	32	1	0.03125	0.5	GO:0052227	GO:BP	catabolism of substance in other organism involved in symbiotic interaction	21118	16494
1477	C1	TRUE	0.0196025	2	32	1	0.03125	0.5	GO:0052229	GO:BP	metabolism of macromolecule in other organism involved in symbiotic interaction	21118	16496
1478	C1	TRUE	0.0196025	2	32	1	0.03125	0.5	GO:0052360	GO:BP	catabolism by host of symbiont macromolecule	21118	16561
1479	C1	TRUE	0.0196025	2	32	1	0.03125	0.5	GO:0052419	GO:BP	metabolism by host of substance in symbiont	21118	16607
1480	C1	TRUE	0.0196025	2	32	1	0.03125	0.5	GO:0052416	GO:BP	metabolism by host of symbiont macromolecule	21118	16604
1481	C1	TRUE	0.0196025	2	32	1	0.03125	0.5	GO:0010813	GO:BP	neuropeptide catabolic process	21118	4960
1482	C1	TRUE	0.0196025	190	32	3	0.09375	0.0157895	GO:0010952	GO:BP	positive regulation of peptidase activity	21118	5084
1483	C1	TRUE	0.0196025	2	32	1	0.03125	0.5	GO:2000458	GO:BP	regulation of astrocyte chemotaxis	21118	29655
1484	C1	TRUE	0.0196025	2	32	1	0.03125	0.5	GO:0002502	GO:BP	peptide antigen assembly with MHC class I protein complex	21118	1157
1485	C1	TRUE	0.0196025	2	32	1	0.03125	0.5	GO:2000471	GO:BP	regulation of hematopoietic stem cell migration	21118	29668
1486	C1	TRUE	0.0196025	51	32	2	0.0625	0.0392157	GO:0045773	GO:BP	positive regulation of axon extension	21118	13541
1487	C1	TRUE	0.0196025	2	32	1	0.03125	0.5	GO:1902567	GO:BP	negative regulation of eosinophil activation	21118	25710
1488	C1	TRUE	0.0196025	2	32	1	0.03125	0.5	GO:1905167	GO:BP	positive regulation of lysosomal protein catabolic process	21118	28050
1489	C1	TRUE	0.0196025	2	32	1	0.03125	0.5	GO:0044111	GO:BP	formation of structure involved in a symbiotic process	21118	12683
1490	C1	TRUE	0.0196025	2	32	1	0.03125	0.5	GO:1905595	GO:BP	regulation of low-density lipoprotein particle receptor binding	21118	28449
1491	C1	TRUE	0.0196025	52	32	2	0.0625	0.0384615	GO:0044091	GO:BP	membrane biogenesis	21118	12673
1492	C1	TRUE	0.0196025	2	32	1	0.03125	0.5	GO:1905602	GO:BP	positive regulation of receptor-mediated endocytosis involved in cholesterol transport	21118	28456
1493	C1	TRUE	0.0196025	2	32	1	0.03125	0.5	GO:0044035	GO:BP	multi-organism catabolic process	21118	12622
1494	C1	TRUE	0.0196025	2	32	1	0.03125	0.5	GO:2000451	GO:BP	positive regulation of CD8-positive, alpha-beta T cell extravasation	21118	29648
1495	C1	TRUE	0.0196025	2	32	1	0.03125	0.5	GO:0052364	GO:BP	catabolism by host of substance in symbiont	21118	16565
1496	C1	TRUE	0.0196025	2	32	1	0.03125	0.5	GO:0090264	GO:BP	regulation of immune complex clearance by monocytes and macrophages	21118	21334
1497	C1	TRUE	0.0196025	2	32	1	0.03125	0.5	GO:0048674	GO:BP	collateral sprouting of injured axon	21118	15020
1498	C1	TRUE	0.0196025	2	32	1	0.03125	0.5	GO:0035700	GO:BP	astrocyte chemotaxis	21118	10596
1499	C1	TRUE	0.0196025	2	32	1	0.03125	0.5	GO:0048693	GO:BP	regulation of collateral sprouting of injured axon	21118	15038
1500	C1	TRUE	0.0196025	2	32	1	0.03125	0.5	GO:0048694	GO:BP	positive regulation of collateral sprouting of injured axon	21118	15039
1501	C1	TRUE	0.0196025	2	32	1	0.03125	0.5	GO:0090265	GO:BP	positive regulation of immune complex clearance by monocytes and macrophages	21118	21335
1542	C1	TRUE	0.0221256	58	32	2	0.0625	0.0344828	GO:0060632	GO:BP	regulation of microtubule-based movement	21118	17441
1548	C1	TRUE	0.0226553	59	32	2	0.0625	0.0338983	GO:0090109	GO:BP	regulation of cell-substrate junction assembly	21118	21187
1549	C1	TRUE	0.0226553	59	32	2	0.0625	0.0338983	GO:0051893	GO:BP	regulation of focal adhesion assembly	21118	16212
1672	C1	TRUE	0.0230648	206	32	3	0.09375	0.0145631	GO:0048839	GO:BP	inner ear development	21118	15174
1701	C1	TRUE	0.0237952	61	32	2	0.0625	0.0327869	GO:1903078	GO:BP	positive regulation of protein localization to plasma membrane	21118	26164
1715	C1	TRUE	0.0247782	3	32	1	0.03125	0.333333	GO:0014738	GO:BP	regulation of muscle hyperplasia	21118	5238
1716	C1	TRUE	0.0247782	3	32	1	0.03125	0.333333	GO:2000409	GO:BP	positive regulation of T cell extravasation	21118	29606
1717	C1	TRUE	0.0247782	3	32	1	0.03125	0.333333	GO:2000645	GO:BP	negative regulation of receptor catabolic process	21118	29833
1718	C1	TRUE	0.0247782	3	32	1	0.03125	0.333333	GO:0006624	GO:BP	vacuolar protein processing	21118	2609
1719	C1	TRUE	0.0247782	3	32	1	0.03125	0.333333	GO:1905599	GO:BP	positive regulation of low-density lipoprotein receptor activity	21118	28453
1720	C1	TRUE	0.0247782	3	32	1	0.03125	0.333333	GO:0007161	GO:BP	calcium-independent cell-matrix adhesion	21118	3074
1721	C1	TRUE	0.0247782	3	32	1	0.03125	0.333333	GO:0021571	GO:BP	rhombomere 5 development	21118	7135
1722	C1	TRUE	0.0247782	3	32	1	0.03125	0.333333	GO:0019376	GO:BP	galactolipid catabolic process	21118	6638
1723	C1	TRUE	0.0247782	3	32	1	0.03125	0.333333	GO:1905581	GO:BP	positive regulation of low-density lipoprotein particle clearance	21118	28436
1724	C1	TRUE	0.0247782	3	32	1	0.03125	0.333333	GO:1904235	GO:BP	regulation of substrate-dependent cell migration, cell attachment to substrate	21118	27191
1725	C1	TRUE	0.0247782	3	32	1	0.03125	0.333333	GO:0003335	GO:BP	corneocyte development	21118	1913
1726	C1	TRUE	0.0247782	3	32	1	0.03125	0.333333	GO:0014900	GO:BP	muscle hyperplasia	21118	5340
1727	C1	TRUE	0.0247782	3	32	1	0.03125	0.333333	GO:1904352	GO:BP	positive regulation of protein catabolic process in the vacuole	21118	27303
1728	C1	TRUE	0.0247782	3	32	1	0.03125	0.333333	GO:1904237	GO:BP	positive regulation of substrate-dependent cell migration, cell attachment to substrate	21118	27193
1729	C1	TRUE	0.0247782	3	32	1	0.03125	0.333333	GO:2000449	GO:BP	regulation of CD8-positive, alpha-beta T cell extravasation	21118	29646
1730	C1	TRUE	0.0247782	3	32	1	0.03125	0.333333	GO:0045583	GO:BP	regulation of cytotoxic T cell differentiation	21118	13357
1731	C1	TRUE	0.0247782	3	32	1	0.03125	0.333333	GO:2000439	GO:BP	positive regulation of monocyte extravasation	21118	29636
1732	C1	TRUE	0.0247782	3	32	1	0.03125	0.333333	GO:0043309	GO:BP	regulation of eosinophil degranulation	21118	12278
1733	C1	TRUE	0.0247782	3	32	1	0.03125	0.333333	GO:0045585	GO:BP	positive regulation of cytotoxic T cell differentiation	21118	13359
1734	C1	TRUE	0.0247782	3	32	1	0.03125	0.333333	GO:0035284	GO:BP	brain segmentation	21118	10308
1735	C1	TRUE	0.0247782	3	32	1	0.03125	0.333333	GO:0002434	GO:BP	immune complex clearance	21118	1089
1736	C1	TRUE	0.0247782	3	32	1	0.03125	0.333333	GO:0035283	GO:BP	central nervous system segmentation	21118	10307
1737	C1	TRUE	0.0247782	66	32	2	0.0625	0.030303	GO:0048146	GO:BP	positive regulation of fibroblast proliferation	21118	14620
1738	C1	TRUE	0.0247782	3	32	1	0.03125	0.333333	GO:0043323	GO:BP	positive regulation of natural killer cell degranulation	21118	12292
1739	C1	TRUE	0.0247782	64	32	2	0.0625	0.03125	GO:0150116	GO:BP	regulation of cell-substrate junction organization	21118	23273
1740	C1	TRUE	0.0247782	3	32	1	0.03125	0.333333	GO:0060448	GO:BP	dichotomous subdivision of terminal units involved in lung branching	21118	17265
1741	C1	TRUE	0.0247782	66	32	2	0.0625	0.030303	GO:0050918	GO:BP	positive chemotaxis	21118	15477
1742	C1	TRUE	0.0247782	3	32	1	0.03125	0.333333	GO:0034769	GO:BP	basement membrane disassembly	21118	10074
1743	C1	TRUE	0.0247782	3	32	1	0.03125	0.333333	GO:0002397	GO:BP	MHC class I protein complex assembly	21118	1053
1769	C1	TRUE	0.0254332	68	32	2	0.0625	0.0294118	GO:1904377	GO:BP	positive regulation of protein localization to cell periphery	21118	27328
1776	C1	TRUE	0.0259643	459	32	4	0.125	0.0087146	GO:0010876	GO:BP	lipid localization	21118	5010
1780	C1	TRUE	0.0261992	229	32	3	0.09375	0.0131004	GO:0016485	GO:BP	protein processing	21118	5841
1810	C1	TRUE	0.0274393	234	32	3	0.09375	0.0128205	GO:0043583	GO:BP	ear development	21118	12464
1817	C1	TRUE	0.0283082	73	32	2	0.0625	0.0273973	GO:0032374	GO:BP	regulation of cholesterol transport	21118	8747
1818	C1	TRUE	0.0283082	73	32	2	0.0625	0.0273973	GO:0032371	GO:BP	regulation of sterol transport	21118	8744
1841	C1	TRUE	0.0291148	4	32	1	0.03125	0.25	GO:1902566	GO:BP	regulation of eosinophil activation	21118	25709
1842	C1	TRUE	0.0291148	4	32	1	0.03125	0.25	GO:1904109	GO:BP	positive regulation of cholesterol import	21118	27077
1843	C1	TRUE	0.0291148	4	32	1	0.03125	0.25	GO:0090271	GO:BP	positive regulation of fibroblast growth factor production	21118	21341
1844	C1	TRUE	0.0291148	4	32	1	0.03125	0.25	GO:1905600	GO:BP	regulation of receptor-mediated endocytosis involved in cholesterol transport	21118	28454
1845	C1	TRUE	0.0291148	4	32	1	0.03125	0.25	GO:0071288	GO:BP	cellular response to mercury ion	21118	19375
1846	C1	TRUE	0.0291148	4	32	1	0.03125	0.25	GO:0043321	GO:BP	regulation of natural killer cell degranulation	21118	12290
1847	C1	TRUE	0.0291148	4	32	1	0.03125	0.25	GO:0071673	GO:BP	positive regulation of smooth muscle cell chemotaxis	21118	19713
1848	C1	TRUE	0.0291148	75	32	2	0.0625	0.0266667	GO:1900076	GO:BP	regulation of cellular response to insulin stimulus	21118	23395
1849	C1	TRUE	0.0291148	4	32	1	0.03125	0.25	GO:0032382	GO:BP	positive regulation of intracellular sterol transport	21118	8755
1850	C1	TRUE	0.0291148	4	32	1	0.03125	0.25	GO:0070346	GO:BP	positive regulation of fat cell proliferation	21118	18859
1851	C1	TRUE	0.0291148	4	32	1	0.03125	0.25	GO:0002501	GO:BP	peptide antigen assembly with MHC protein complex	21118	1156
1852	C1	TRUE	0.0291148	4	32	1	0.03125	0.25	GO:0035697	GO:BP	CD8-positive, alpha-beta T cell extravasation	21118	10593
1853	C1	TRUE	0.0291148	4	32	1	0.03125	0.25	GO:0032385	GO:BP	positive regulation of intracellular cholesterol transport	21118	8758
1854	C1	TRUE	0.0291148	4	32	1	0.03125	0.25	GO:2000437	GO:BP	regulation of monocyte extravasation	21118	29634
1855	C1	TRUE	0.0291148	4	32	1	0.03125	0.25	GO:1903553	GO:BP	positive regulation of extracellular exosome assembly	21118	26581
1856	C1	TRUE	0.0291148	4	32	1	0.03125	0.25	GO:2001170	GO:BP	negative regulation of ATP biosynthetic process	21118	30322
1857	C1	TRUE	0.0291148	4	32	1	0.03125	0.25	GO:0048691	GO:BP	positive regulation of axon extension involved in regeneration	21118	15036
1858	C1	TRUE	0.0291148	4	32	1	0.03125	0.25	GO:2000911	GO:BP	positive regulation of sterol import	21118	30089
1859	C1	TRUE	0.0291148	4	32	1	0.03125	0.25	GO:0071672	GO:BP	negative regulation of smooth muscle cell chemotaxis	21118	19712
1860	C1	TRUE	0.0291148	4	32	1	0.03125	0.25	GO:0045065	GO:BP	cytotoxic T cell differentiation	21118	13152
1872	C1	TRUE	0.029781	78	32	2	0.0625	0.025641	GO:0048041	GO:BP	focal adhesion assembly	21118	14551
1931	C1	TRUE	0.0334272	5	32	1	0.03125	0.2	GO:1903575	GO:BP	cornified envelope assembly	21118	26602
1932	C1	TRUE	0.0334272	5	32	1	0.03125	0.2	GO:0048687	GO:BP	positive regulation of sprouting of injured axon	21118	15032
1933	C1	TRUE	0.0334272	5	32	1	0.03125	0.2	GO:0052204	GO:BP	negative regulation of molecular function in other organism involved in symbiotic interaction	21118	16471
1934	C1	TRUE	0.0334272	5	32	1	0.03125	0.2	GO:0002278	GO:BP	eosinophil activation involved in immune response	21118	942
1935	C1	TRUE	0.0334272	5	32	1	0.03125	0.2	GO:1900149	GO:BP	positive regulation of Schwann cell migration	21118	23468
1936	C1	TRUE	0.0334272	5	32	1	0.03125	0.2	GO:0044362	GO:BP	negative regulation of molecular function in other organism	21118	12793
1937	C1	TRUE	0.0334272	5	32	1	0.03125	0.2	GO:0032379	GO:BP	positive regulation of intracellular lipid transport	21118	8752
1938	C1	TRUE	0.0334272	5	32	1	0.03125	0.2	GO:0044033	GO:BP	multi-organism metabolic process	21118	12620
1939	C1	TRUE	0.0334272	5	32	1	0.03125	0.2	GO:0060708	GO:BP	spongiotrophoblast differentiation	21118	17515
1940	C1	TRUE	0.0334272	5	32	1	0.03125	0.2	GO:0061642	GO:BP	chemoattraction of axon	21118	18352
1941	C1	TRUE	0.0334272	5	32	1	0.03125	0.2	GO:0021603	GO:BP	cranial nerve formation	21118	7166
1942	C1	TRUE	0.0334272	5	32	1	0.03125	0.2	GO:0002396	GO:BP	MHC protein complex assembly	21118	1052
1943	C1	TRUE	0.0334272	5	32	1	0.03125	0.2	GO:0097350	GO:BP	neutrophil clearance	21118	21856
1944	C1	TRUE	0.0334272	5	32	1	0.03125	0.2	GO:0043308	GO:BP	eosinophil degranulation	21118	12277
1945	C1	TRUE	0.0334272	5	32	1	0.03125	0.2	GO:0052405	GO:BP	negative regulation by host of symbiont molecular function	21118	16593
1946	C1	TRUE	0.0334272	5	32	1	0.03125	0.2	GO:0090118	GO:BP	receptor-mediated endocytosis involved in cholesterol transport	21118	21196
1947	C1	TRUE	0.0334272	5	32	1	0.03125	0.2	GO:0071315	GO:BP	cellular response to morphine	21118	19402
1948	C1	TRUE	0.0334272	5	32	1	0.03125	0.2	GO:2000407	GO:BP	regulation of T cell extravasation	21118	29604
1965	C1	TRUE	0.0345811	88	32	2	0.0625	0.0227273	GO:0032370	GO:BP	positive regulation of lipid transport	21118	8743
2130	C1	TRUE	0.0377292	6	32	1	0.03125	0.166667	GO:0006678	GO:BP	glucosylceramide metabolic process	21118	2659
2131	C1	TRUE	0.0377292	6	32	1	0.03125	0.166667	GO:0002447	GO:BP	eosinophil mediated immunity	21118	1102
2132	C1	TRUE	0.0377292	6	32	1	0.03125	0.166667	GO:0071317	GO:BP	cellular response to isoquinoline alkaloid	21118	19404
2133	C1	TRUE	0.0377292	6	32	1	0.03125	0.166667	GO:0043307	GO:BP	eosinophil activation	21118	12276
2134	C1	TRUE	0.0377292	6	32	1	0.03125	0.166667	GO:0010815	GO:BP	bradykinin catabolic process	21118	4962
2135	C1	TRUE	0.0377292	6	32	1	0.03125	0.166667	GO:0032803	GO:BP	regulation of low-density lipoprotein particle receptor catabolic process	21118	9065
2136	C1	TRUE	0.0377292	6	32	1	0.03125	0.166667	GO:0006931	GO:BP	substrate-dependent cell migration, cell attachment to substrate	21118	2882
2137	C1	TRUE	0.0377292	6	32	1	0.03125	0.166667	GO:0030046	GO:BP	parallel actin filament bundle assembly	21118	7711
2138	C1	TRUE	0.0377292	6	32	1	0.03125	0.166667	GO:0032802	GO:BP	low-density lipoprotein particle receptor catabolic process	21118	9064
2139	C1	TRUE	0.0377292	6	32	1	0.03125	0.166667	GO:0048690	GO:BP	regulation of axon extension involved in regeneration	21118	15035
2140	C1	TRUE	0.0377292	6	32	1	0.03125	0.166667	GO:1901164	GO:BP	negative regulation of trophoblast cell migration	21118	24454
2141	C1	TRUE	0.0377292	6	32	1	0.03125	0.166667	GO:0002461	GO:BP	tolerance induction dependent upon immune response	21118	1116
2142	C1	TRUE	0.0377292	6	32	1	0.03125	0.166667	GO:1905165	GO:BP	regulation of lysosomal protein catabolic process	21118	28048
2143	C1	TRUE	0.0377292	6	32	1	0.03125	0.166667	GO:2000909	GO:BP	regulation of sterol import	21118	30087
2144	C1	TRUE	0.0377292	6	32	1	0.03125	0.166667	GO:0032799	GO:BP	low-density lipoprotein receptor particle metabolic process	21118	9061
2145	C1	TRUE	0.0377292	6	32	1	0.03125	0.166667	GO:1903551	GO:BP	regulation of extracellular exosome assembly	21118	26579
2146	C1	TRUE	0.0377292	6	32	1	0.03125	0.166667	GO:0060620	GO:BP	regulation of cholesterol import	21118	17430
2206	C1	TRUE	0.0388605	97	32	2	0.0625	0.0206186	GO:0032092	GO:BP	positive regulation of protein binding	21118	8558
2207	C1	TRUE	0.0388605	97	32	2	0.0625	0.0206186	GO:0002456	GO:BP	T cell mediated immunity	21118	1111
2208	C1	TRUE	0.0388605	290	32	3	0.09375	0.0103448	GO:0030198	GO:BP	extracellular matrix organization	21118	7761
2209	C1	TRUE	0.0388605	97	32	2	0.0625	0.0206186	GO:0050772	GO:BP	positive regulation of axonogenesis	21118	15355
2211	C1	TRUE	0.0390579	291	32	3	0.09375	0.0103093	GO:0031647	GO:BP	regulation of protein stability	21118	8438
2212	C1	TRUE	0.0390579	291	32	3	0.09375	0.0103093	GO:0045229	GO:BP	external encapsulating structure organization	21118	13241
2217	C1	TRUE	0.0392011	292	32	3	0.09375	0.010274	GO:0043062	GO:BP	extracellular structure organization	21118	12159
2218	C1	TRUE	0.0392011	98	32	2	0.0625	0.0204082	GO:0045921	GO:BP	positive regulation of exocytosis	21118	13673
2239	C1	TRUE	0.0403874	296	32	3	0.09375	0.0101351	GO:0051604	GO:BP	protein maturation	21118	16013
2248	C1	TRUE	0.0407529	7	32	1	0.03125	0.142857	GO:1900372	GO:BP	negative regulation of purine nucleotide biosynthetic process	21118	23681
2249	C1	TRUE	0.0407529	7	32	1	0.03125	0.142857	GO:1904350	GO:BP	regulation of protein catabolic process in the vacuole	21118	27301
2250	C1	TRUE	0.0407529	7	32	1	0.03125	0.142857	GO:1901166	GO:BP	neural crest cell migration involved in autonomic nervous system development	21118	24456
2251	C1	TRUE	0.0407529	7	32	1	0.03125	0.142857	GO:0046477	GO:BP	glycosylceramide catabolic process	21118	14200
2252	C1	TRUE	0.0407529	7	32	1	0.03125	0.142857	GO:0048686	GO:BP	regulation of sprouting of injured axon	21118	15031
2253	C1	TRUE	0.0407529	7	32	1	0.03125	0.142857	GO:0071671	GO:BP	regulation of smooth muscle cell chemotaxis	21118	19711
2254	C1	TRUE	0.0407529	7	32	1	0.03125	0.142857	GO:0048677	GO:BP	axon extension involved in regeneration	21118	15022
2255	C1	TRUE	0.0407529	7	32	1	0.03125	0.142857	GO:0044359	GO:BP	modulation of molecular function in other organism	21118	12790
2256	C1	TRUE	0.0407529	7	32	1	0.03125	0.142857	GO:0030809	GO:BP	negative regulation of nucleotide biosynthetic process	21118	8007
2257	C1	TRUE	0.0407529	7	32	1	0.03125	0.142857	GO:0070459	GO:BP	prolactin secretion	21118	18923
2258	C1	TRUE	0.0407529	7	32	1	0.03125	0.142857	GO:0052428	GO:BP	modulation by host of symbiont molecular function	21118	16615
2259	C1	TRUE	0.0407529	7	32	1	0.03125	0.142857	GO:0071971	GO:BP	extracellular exosome assembly	21118	19907
2260	C1	TRUE	0.0407529	7	32	1	0.03125	0.142857	GO:0150094	GO:BP	amyloid-beta clearance by cellular catabolic process	21118	23260
2261	C1	TRUE	0.0407529	7	32	1	0.03125	0.142857	GO:0150093	GO:BP	amyloid-beta clearance by transcytosis	21118	23259
2262	C1	TRUE	0.0407529	7	32	1	0.03125	0.142857	GO:0140507	GO:BP	granzyme-mediated programmed cell death signaling pathway	21118	23167
2263	C1	TRUE	0.0407529	7	32	1	0.03125	0.142857	GO:0043320	GO:BP	natural killer cell degranulation	21118	12289
2264	C1	TRUE	0.0407529	7	32	1	0.03125	0.142857	GO:0052205	GO:BP	modulation of molecular function in other organism involved in symbiotic interaction	21118	16472
2297	C1	TRUE	0.0429036	107	32	2	0.0625	0.0186916	GO:0030301	GO:BP	cholesterol transport	21118	7814
2334	C1	TRUE	0.0430306	8	32	1	0.03125	0.125	GO:0032383	GO:BP	regulation of intracellular cholesterol transport	21118	8756
2335	C1	TRUE	0.0430306	8	32	1	0.03125	0.125	GO:0045627	GO:BP	positive regulation of T-helper 1 cell differentiation	21118	13401
2336	C1	TRUE	0.0430306	8	32	1	0.03125	0.125	GO:0010890	GO:BP	positive regulation of sequestering of triglyceride	21118	5024
2337	C1	TRUE	0.0430306	8	32	1	0.03125	0.125	GO:0036135	GO:BP	Schwann cell migration	21118	10925
2338	C1	TRUE	0.0430306	8	32	1	0.03125	0.125	GO:0048682	GO:BP	sprouting of injured axon	21118	15027
2339	C1	TRUE	0.0430306	8	32	1	0.03125	0.125	GO:0021546	GO:BP	rhombomere development	21118	7110
2340	C1	TRUE	0.0430306	8	32	1	0.03125	0.125	GO:0032380	GO:BP	regulation of intracellular sterol transport	21118	8753
2341	C1	TRUE	0.0430306	8	32	1	0.03125	0.125	GO:0071447	GO:BP	cellular response to hydroperoxide	21118	19525
2342	C1	TRUE	0.0430306	108	32	2	0.0625	0.0185185	GO:0030516	GO:BP	regulation of axon extension	21118	7910
2343	C1	TRUE	0.0430306	8	32	1	0.03125	0.125	GO:0042590	GO:BP	antigen processing and presentation of exogenous peptide antigen via MHC class I	21118	11868
2344	C1	TRUE	0.0430306	8	32	1	0.03125	0.125	GO:0035696	GO:BP	monocyte extravasation	21118	10592
2345	C1	TRUE	0.0430306	8	32	1	0.03125	0.125	GO:0097211	GO:BP	cellular response to gonadotropin-releasing hormone	21118	21766
2346	C1	TRUE	0.0430306	8	32	1	0.03125	0.125	GO:1900122	GO:BP	positive regulation of receptor binding	21118	23441
2347	C1	TRUE	0.0430306	313	32	3	0.09375	0.00958466	GO:0045787	GO:BP	positive regulation of cell cycle	21118	13555
2348	C1	TRUE	0.0430306	8	32	1	0.03125	0.125	GO:0006681	GO:BP	galactosylceramide metabolic process	21118	2662
2349	C1	TRUE	0.0430306	8	32	1	0.03125	0.125	GO:1900147	GO:BP	regulation of Schwann cell migration	21118	23466
2379	C1	TRUE	0.0448976	113	32	2	0.0625	0.0176991	GO:0003014	GO:BP	renal system process	21118	1599
2389	C1	TRUE	0.0453214	114	32	2	0.0625	0.0175439	GO:0045931	GO:BP	positive regulation of mitotic cell cycle	21118	13683
2394	C1	TRUE	0.0459118	327	32	3	0.09375	0.00917431	GO:0001822	GO:BP	kidney development	21118	600
2400	C1	TRUE	0.0463872	9	32	1	0.03125	0.111111	GO:0035701	GO:BP	hematopoietic stem cell migration	21118	10597
2401	C1	TRUE	0.0463872	9	32	1	0.03125	0.111111	GO:0002246	GO:BP	wound healing involved in inflammatory response	21118	910
2402	C1	TRUE	0.0463872	9	32	1	0.03125	0.111111	GO:0072378	GO:BP	blood coagulation, fibrin clot formation	21118	20288
2403	C1	TRUE	0.0463872	9	32	1	0.03125	0.111111	GO:0019374	GO:BP	galactolipid metabolic process	21118	6636
2404	C1	TRUE	0.0463872	9	32	1	0.03125	0.111111	GO:0097210	GO:BP	response to gonadotropin-releasing hormone	21118	21765
2405	C1	TRUE	0.0463872	9	32	1	0.03125	0.111111	GO:2000510	GO:BP	positive regulation of dendritic cell chemotaxis	21118	29701
2406	C1	TRUE	0.0463872	9	32	1	0.03125	0.111111	GO:0010986	GO:BP	positive regulation of lipoprotein particle clearance	21118	5117
2407	C1	TRUE	0.0463872	9	32	1	0.03125	0.111111	GO:0032377	GO:BP	regulation of intracellular lipid transport	21118	8750
2408	C1	TRUE	0.0463872	9	32	1	0.03125	0.111111	GO:0048387	GO:BP	negative regulation of retinoic acid receptor signaling pathway	21118	14803
2409	C1	TRUE	0.0463872	9	32	1	0.03125	0.111111	GO:0071670	GO:BP	smooth muscle cell chemotaxis	21118	19710
2464	C1	TRUE	0.0475148	335	32	3	0.09375	0.00895522	GO:1903532	GO:BP	positive regulation of secretion by cell	21118	26561
2465	C1	TRUE	0.0475148	119	32	2	0.0625	0.0168067	GO:0015918	GO:BP	sterol transport	21118	5594
2523	C1	TRUE	0.0480194	120	32	2	0.0625	0.0166667	GO:0001952	GO:BP	regulation of cell-matrix adhesion	21118	686
2524	C1	TRUE	0.0480194	120	32	2	0.0625	0.0166667	GO:0021549	GO:BP	cerebellum development	21118	7113
2527	C1	TRUE	0.0482418	338	32	3	0.09375	0.00887574	GO:0072001	GO:BP	renal system development	21118	19930
2529	C1	TRUE	0.0484389	121	32	2	0.0625	0.0165289	GO:0061387	GO:BP	regulation of extent of cell growth	21118	18166
2538	C1	TRUE	0.0495034	634	32	4	0.125	0.00630915	GO:0048598	GO:BP	embryonic morphogenesis	21118	14951
2588	C1	TRUE	0.049642	10	32	1	0.03125	0.1	GO:2000508	GO:BP	regulation of dendritic cell chemotaxis	21118	29699
2589	C1	TRUE	0.049642	10	32	1	0.03125	0.1	GO:1903238	GO:BP	positive regulation of leukocyte tethering or rolling	21118	26291
61	C10	TRUE	9.24112e-09	23	86	7	0.0813953	0.304348	GO:0002504	GO:BP	antigen processing and presentation of peptide or polysaccharide antigen via MHC class II	21118	1159
192	C10	TRUE	2.88401e-06	87	57	8	0.140351	0.091954	KEGG:04658	KEGG	Th1 and Th2 cell differentiation	8790	316
201	C10	TRUE	3.9026e-06	93	57	8	0.140351	0.0860215	KEGG:04640	KEGG	Hematopoietic cell lineage	8790	313
207	C10	TRUE	4.67817e-06	179	57	10	0.175439	0.0558659	KEGG:05152	KEGG	Tuberculosis	8790	418
209	C10	TRUE	4.81542e-06	103	57	8	0.140351	0.0776699	KEGG:04659	KEGG	Th17 cell differentiation	8790	317
243	C10	TRUE	1.12292e-05	18	86	5	0.0581395	0.277778	GO:0002495	GO:BP	antigen processing and presentation of peptide antigen via MHC class II	21118	1150
253	C10	TRUE	1.5085e-05	165	57	9	0.157895	0.0545455	KEGG:04514	KEGG	Cell adhesion molecules	8790	295
259	C10	TRUE	1.82697e-05	55	57	6	0.105263	0.109091	KEGG:05330	KEGG	Allograft rejection	8790	462
280	C10	TRUE	2.50691e-05	528	86	14	0.162791	0.0265152	GO:0002250	GO:BP	adaptive immune response	21118	914
289	C10	TRUE	3.11312e-05	61	57	6	0.105263	0.0983607	KEGG:05321	KEGG	Inflammatory bowel disease	8790	459
290	C10	TRUE	3.16571e-05	62	57	6	0.105263	0.0967742	KEGG:04940	KEGG	Type I diabetes mellitus	8790	372
305	C10	TRUE	4.26952e-05	186	86	9	0.104651	0.0483871	GO:0022408	GO:BP	negative regulation of cell-cell adhesion	21118	7606
323	C10	TRUE	5.66207e-05	12	86	4	0.0465116	0.333333	GO:0019886	GO:BP	antigen processing and presentation of exogenous peptide antigen via MHC class II	21118	7021
327	C10	TRUE	6.13155e-05	71	57	6	0.105263	0.084507	KEGG:05320	KEGG	Autoimmune thyroid disease	8790	458
328	C10	TRUE	6.13155e-05	109	57	7	0.122807	0.0642202	KEGG:05145	KEGG	Toxoplasmosis	8790	415
373	C10	TRUE	0.000108178	169	57	8	0.140351	0.0473373	KEGG:03010	KEGG	Ribosome	8790	206
397	C10	TRUE	0.000155139	86	57	6	0.105263	0.0697674	KEGG:05323	KEGG	Rheumatoid arthritis	8790	461
402	C10	TRUE	0.000165289	239	57	9	0.157895	0.0376569	KEGG:05166	KEGG	Human T-cell leukemia virus 1 infection	8790	425
461	C10	TRUE	0.000286278	22	86	4	0.0465116	0.181818	GO:0002478	GO:BP	antigen processing and presentation of exogenous peptide antigen	21118	1133
536	C10	TRUE	0.000595217	107	86	6	0.0697674	0.0560748	GO:0031532	GO:BP	actin cytoskeleton reorganization	21118	8372
537	C10	TRUE	0.000595217	28	86	4	0.0465116	0.142857	GO:0019884	GO:BP	antigen processing and presentation of exogenous antigen	21118	7019
553	C10	TRUE	0.00069011	64	86	5	0.0581395	0.078125	GO:0048002	GO:BP	antigen processing and presentation of peptide antigen	21118	14527
577	C10	TRUE	0.00084678	117	86	6	0.0697674	0.0512821	GO:0050868	GO:BP	negative regulation of T cell activation	21118	15433
645	C10	TRUE	0.00124983	129	86	6	0.0697674	0.0465116	GO:1903038	GO:BP	negative regulation of leukocyte cell-cell adhesion	21118	26124
653	C10	TRUE	0.00132515	197	86	7	0.0813953	0.035533	GO:0050870	GO:BP	positive regulation of T cell activation	21118	15435
661	C10	TRUE	0.00138635	1171	86	16	0.186047	0.0136635	GO:0060429	GO:BP	epithelium development	21118	17246
717	C10	TRUE	0.0019155	142	57	6	0.105263	0.0422535	KEGG:05322	KEGG	Systemic lupus erythematosus	8790	460
732	C10	TRUE	0.0020836	95	86	5	0.0581395	0.0526316	GO:0045582	GO:BP	positive regulation of T cell differentiation	21118	13356
768	C10	TRUE	0.00262624	19	86	3	0.0348837	0.157895	GO:0045953	GO:BP	negative regulation of natural killer cell mediated cytotoxicity	21118	13703
805	C10	TRUE	0.00294058	20	86	3	0.0348837	0.15	GO:0002716	GO:BP	negative regulation of natural killer cell mediated immunity	21118	1366
826	C10	TRUE	0.00331426	110	86	5	0.0581395	0.0454545	GO:0045621	GO:BP	positive regulation of lymphocyte differentiation	21118	13395
848	C10	TRUE	0.00352212	22	86	3	0.0348837	0.136364	GO:0001911	GO:BP	negative regulation of leukocyte mediated cytotoxicity	21118	653
906	C10	TRUE	0.00444643	119	86	5	0.0581395	0.0420168	GO:0002286	GO:BP	T cell activation involved in immune response	21118	950
916	C10	TRUE	0.00458154	64	86	4	0.0465116	0.0625	GO:0046635	GO:BP	positive regulation of alpha-beta T cell activation	21118	14295
917	C10	TRUE	0.00458154	64	86	4	0.0465116	0.0625	GO:0045824	GO:BP	negative regulation of innate immune response	21118	13584
951	C10	TRUE	0.0050978	26	86	3	0.0348837	0.115385	GO:0031342	GO:BP	negative regulation of cell killing	21118	8299
966	C10	TRUE	0.00552422	69	86	4	0.0465116	0.057971	GO:0042273	GO:BP	ribosomal large subunit biogenesis	21118	11681
979	C10	TRUE	0.00566011	205	86	6	0.0697674	0.0292683	GO:0002285	GO:BP	lymphocyte activation involved in immune response	21118	949
994	C10	TRUE	0.00573414	28	86	3	0.0348837	0.107143	GO:0031338	GO:BP	regulation of vesicle fusion	21118	8295
995	C10	TRUE	0.00573414	28	86	3	0.0348837	0.107143	GO:0000027	GO:BP	ribosomal large subunit assembly	21118	14
1018	C10	TRUE	0.00618178	29	86	3	0.0348837	0.103448	GO:0002825	GO:BP	regulation of T-helper 1 type immune response	21118	1468
1030	C10	TRUE	0.00661201	6	86	2	0.0232558	0.333333	GO:0060309	GO:BP	elastin catabolic process	21118	17134
1031	C10	TRUE	0.00661201	6	86	2	0.0232558	0.333333	GO:0051665	GO:BP	membrane raft localization	21118	16069
1058	C10	TRUE	0.00719299	31	86	3	0.0348837	0.0967742	GO:0051085	GO:BP	chaperone cofactor-dependent protein refolding	21118	15609
1095	C10	TRUE	0.00819789	657	86	10	0.116279	0.0152207	GO:0006412	GO:BP	translation	21118	2415
1113	C10	TRUE	0.00846991	148	86	5	0.0581395	0.0337838	GO:0045580	GO:BP	regulation of T cell differentiation	21118	13354
1133	C10	TRUE	0.00883806	793	86	11	0.127907	0.0138714	GO:0043604	GO:BP	amide biosynthetic process	21118	12473
1143	C10	TRUE	0.00927096	35	86	3	0.0348837	0.0857143	GO:0051084	GO:BP	'de novo' posttranslational protein folding	21118	15608
1166	C10	TRUE	0.00976853	677	86	10	0.116279	0.014771	GO:0043043	GO:BP	peptide biosynthetic process	21118	12141
1167	C10	TRUE	0.00976853	36	86	3	0.0348837	0.0833333	GO:0006458	GO:BP	'de novo' protein folding	21118	2451
1168	C10	TRUE	0.00976853	86	86	4	0.0465116	0.0465116	GO:0060395	GO:BP	SMAD protein signal transduction	21118	17216
1169	C10	TRUE	0.00977731	155	86	5	0.0581395	0.0322581	GO:0002833	GO:BP	positive regulation of response to biotic stimulus	21118	1476
1243	C10	TRUE	0.0118661	9	86	2	0.0232558	0.222222	GO:0031394	GO:BP	positive regulation of prostaglandin biosynthetic process	21118	8319
1273	C10	TRUE	0.0128293	96	86	4	0.0465116	0.0416667	GO:0046634	GO:BP	regulation of alpha-beta T cell activation	21118	14294
1277	C10	TRUE	0.012993	42	86	3	0.0348837	0.0714286	GO:0042269	GO:BP	regulation of natural killer cell mediated cytotoxicity	21118	11678
1278	C10	TRUE	0.012993	590	86	9	0.104651	0.0152542	GO:0010638	GO:BP	positive regulation of organelle organization	21118	4796
1279	C10	TRUE	0.012993	97	86	4	0.0465116	0.0412371	GO:0002832	GO:BP	negative regulation of response to biotic stimulus	21118	1475
1294	C10	TRUE	0.0134851	10	86	2	0.0232558	0.2	GO:2001280	GO:BP	positive regulation of unsaturated fatty acid biosynthetic process	21118	30422
1295	C10	TRUE	0.0134851	10	86	2	0.0232558	0.2	GO:0051541	GO:BP	elastin metabolic process	21118	15956
1303	C10	TRUE	0.013915	44	86	3	0.0348837	0.0681818	GO:0002715	GO:BP	regulation of natural killer cell mediated immunity	21118	1365
1304	C10	TRUE	0.013915	44	86	3	0.0348837	0.0681818	GO:0042088	GO:BP	T-helper 1 type immune response	21118	11566
1307	C10	TRUE	0.0140531	45	86	3	0.0348837	0.0666667	GO:0045581	GO:BP	negative regulation of T cell differentiation	21118	13355
1308	C10	TRUE	0.0140531	178	86	5	0.0581395	0.0280899	GO:0045619	GO:BP	regulation of lymphocyte differentiation	21118	13393
1309	C10	TRUE	0.0140531	45	86	3	0.0348837	0.0666667	GO:0002707	GO:BP	negative regulation of lymphocyte mediated immunity	21118	1357
1351	C10	TRUE	0.0146449	11	86	2	0.0232558	0.181818	GO:1904667	GO:BP	negative regulation of ubiquitin protein ligase activity	21118	27591
1352	C10	TRUE	0.0146727	492	86	8	0.0930233	0.0162602	GO:0016049	GO:BP	cell growth	21118	5669
1358	C10	TRUE	0.0148529	379	86	7	0.0813953	0.0184697	GO:0045861	GO:BP	negative regulation of proteolysis	21118	13619
1389	C10	TRUE	0.0162473	12	86	2	0.0232558	0.166667	GO:0031392	GO:BP	regulation of prostaglandin biosynthetic process	21118	8317
1390	C10	TRUE	0.0162473	12	86	2	0.0232558	0.166667	GO:0002579	GO:BP	positive regulation of antigen processing and presentation	21118	1232
1424	C10	TRUE	0.0176622	13	86	2	0.0232558	0.153846	GO:2001279	GO:BP	regulation of unsaturated fatty acid biosynthetic process	21118	30421
1425	C10	TRUE	0.0176622	13	86	2	0.0232558	0.153846	GO:0031340	GO:BP	positive regulation of vesicle fusion	21118	8297
1426	C10	TRUE	0.0176622	645	86	9	0.104651	0.0139535	GO:0048729	GO:BP	tissue morphogenesis	21118	15074
1427	C10	TRUE	0.0177823	115	86	4	0.0465116	0.0347826	GO:0045089	GO:BP	positive regulation of innate immune response	21118	13161
1444	C10	TRUE	0.0184683	53	86	3	0.0348837	0.0566038	GO:0045620	GO:BP	negative regulation of lymphocyte differentiation	21118	13394
1445	C10	TRUE	0.0186637	117	86	4	0.0465116	0.034188	GO:0071887	GO:BP	leukocyte apoptotic process	21118	19845
1515	C10	TRUE	0.0209154	536	86	8	0.0930233	0.0149254	GO:0002009	GO:BP	morphogenesis of an epithelium	21118	738
1518	C10	TRUE	0.0209764	122	86	4	0.0465116	0.0327869	GO:0042177	GO:BP	negative regulation of protein catabolic process	21118	11613
1519	C10	TRUE	0.0209764	417	86	7	0.0813953	0.0167866	GO:0001558	GO:BP	regulation of cell growth	21118	465
1545	C10	TRUE	0.0222682	58	86	3	0.0348837	0.0517241	GO:0042267	GO:BP	natural killer cell mediated cytotoxicity	21118	11676
1702	C10	TRUE	0.0238383	60	86	3	0.0348837	0.05	GO:0002228	GO:BP	natural killer cell mediated immunity	21118	893
1744	C10	TRUE	0.0249124	131	86	4	0.0465116	0.0305344	GO:0048675	GO:BP	axon extension	21118	15021
1760	C10	TRUE	0.0250972	132	86	4	0.0465116	0.030303	GO:0032273	GO:BP	positive regulation of protein polymerization	21118	8672
1764	C10	TRUE	0.0251951	839	86	10	0.116279	0.011919	GO:0006886	GO:BP	intracellular protein transport	21118	2842
1766	C10	TRUE	0.0252508	63	86	3	0.0348837	0.047619	GO:0042255	GO:BP	ribosome assembly	21118	11669
1779	C10	TRUE	0.0261899	445	86	7	0.0813953	0.0157303	GO:0007409	GO:BP	axonogenesis	21118	3297
1807	C10	TRUE	0.0271902	18	86	2	0.0232558	0.111111	GO:0051444	GO:BP	negative regulation of ubiquitin-protein transferase activity	21118	15890
1899	C10	TRUE	0.0318584	71	86	3	0.0348837	0.0422535	GO:1901796	GO:BP	regulation of signal transduction by p53 class mediator	21118	25031
1900	C10	TRUE	0.0318665	147	86	4	0.0465116	0.0272109	GO:0030010	GO:BP	establishment of cell polarity	21118	7695
1918	C10	TRUE	0.0327475	603	86	8	0.0930233	0.013267	GO:0048667	GO:BP	cell morphogenesis involved in neuron differentiation	21118	15013
1950	C10	TRUE	0.033527	21	86	2	0.0232558	0.0952381	GO:2000114	GO:BP	regulation of establishment of cell polarity	21118	29316
1952	C10	TRUE	0.0338932	2974	86	22	0.255814	0.00739744	GO:0044085	GO:BP	cellular component biogenesis	21118	12668
1966	C10	TRUE	0.0345933	358	86	6	0.0697674	0.0167598	GO:0060562	GO:BP	epithelial tube morphogenesis	21118	17375
1981	C10	TRUE	0.0357172	22	86	2	0.0232558	0.0909091	GO:0043371	GO:BP	negative regulation of CD4-positive, alpha-beta T cell differentiation	21118	12310
1982	C10	TRUE	0.0357172	22	86	2	0.0232558	0.0909091	GO:0045624	GO:BP	positive regulation of T-helper cell differentiation	21118	13398
1983	C10	TRUE	0.0359441	1	86	1	0.0116279	1	GO:0044858	GO:BP	plasma membrane raft polarization	21118	13084
1984	C10	TRUE	0.0359441	23	86	2	0.0232558	0.0869565	GO:0031579	GO:BP	membrane raft organization	21118	8405
1985	C10	TRUE	0.0359441	1	86	1	0.0116279	1	GO:0032712	GO:BP	negative regulation of interleukin-3 production	21118	8985
1986	C10	TRUE	0.0359441	1	86	1	0.0116279	1	GO:2001189	GO:BP	negative regulation of T cell activation via T cell receptor contact with antigen bound to MHC molecule on antigen presenting cell	21118	30335
1987	C10	TRUE	0.0359441	77	86	3	0.0348837	0.038961	GO:1903363	GO:BP	negative regulation of cellular protein catabolic process	21118	26403
1988	C10	TRUE	0.0359441	1	86	1	0.0116279	1	GO:2000521	GO:BP	negative regulation of immunological synapse formation	21118	29712
1989	C10	TRUE	0.0359441	252	86	5	0.0581395	0.0198413	GO:1903362	GO:BP	regulation of cellular protein catabolic process	21118	26402
1990	C10	TRUE	0.0359441	1	86	1	0.0116279	1	GO:0071656	GO:BP	negative regulation of granulocyte colony-stimulating factor production	21118	19700
1991	C10	TRUE	0.0359441	1	86	1	0.0116279	1	GO:1903906	GO:BP	regulation of plasma membrane raft polarization	21118	26893
1992	C10	TRUE	0.0359441	1	86	1	0.0116279	1	GO:1904905	GO:BP	negative regulation of endothelial cell-matrix adhesion via fibronectin	21118	27810
1993	C10	TRUE	0.0359441	155	86	4	0.0465116	0.0258065	GO:0061025	GO:BP	membrane fusion	21118	17819
1994	C10	TRUE	0.0359441	1	86	1	0.0116279	1	GO:1901257	GO:BP	negative regulation of macrophage colony-stimulating factor production	21118	24538
2053	C10	TRUE	0.0362991	79	86	3	0.0348837	0.0379747	GO:0070227	GO:BP	lymphocyte apoptotic process	21118	18779
2213	C10	TRUE	0.0390818	25	86	2	0.0232558	0.08	GO:1901798	GO:BP	positive regulation of signal transduction by p53 class mediator	21118	25033
2214	C10	TRUE	0.0390818	25	86	2	0.0232558	0.08	GO:1904666	GO:BP	regulation of ubiquitin protein ligase activity	21118	27590
2215	C10	TRUE	0.0390818	25	86	2	0.0232558	0.08	GO:0045723	GO:BP	positive regulation of fatty acid biosynthetic process	21118	13493
2216	C10	TRUE	0.0390818	25	86	2	0.0232558	0.08	GO:0006516	GO:BP	glycoprotein catabolic process	21118	2503
2238	C10	TRUE	0.0403865	84	86	3	0.0348837	0.0357143	GO:0042246	GO:BP	tissue regeneration	21118	11661
2244	C10	TRUE	0.0406209	26	86	2	0.0232558	0.0769231	GO:0032878	GO:BP	regulation of establishment or maintenance of cell polarity	21118	9108
2245	C10	TRUE	0.0406209	26	86	2	0.0232558	0.0769231	GO:0046639	GO:BP	negative regulation of alpha-beta T cell differentiation	21118	14299
2246	C10	TRUE	0.0406209	794	86	9	0.104651	0.011335	GO:0032989	GO:BP	cellular component morphogenesis	21118	9203
2247	C10	TRUE	0.0406209	26	86	2	0.0232558	0.0769231	GO:0010226	GO:BP	response to lithium ion	21118	4495
2278	C10	TRUE	0.0415677	656	86	8	0.0930233	0.0121951	GO:0048812	GO:BP	neuron projection morphogenesis	21118	15148
2279	C10	TRUE	0.0419962	27	86	2	0.0232558	0.0740741	GO:0032647	GO:BP	regulation of interferon-alpha production	21118	8920
2280	C10	TRUE	0.0419962	27	86	2	0.0232558	0.0740741	GO:0032607	GO:BP	interferon-alpha production	21118	8880
2390	C10	TRUE	0.0453645	670	86	8	0.0930233	0.0119403	GO:0120039	GO:BP	plasma membrane bounded cell projection morphogenesis	21118	22822
2396	C10	TRUE	0.0462177	675	86	8	0.0930233	0.0118519	GO:0048858	GO:BP	cell projection morphogenesis	21118	15193
2397	C10	TRUE	0.0462177	29	86	2	0.0232558	0.0689655	GO:2000515	GO:BP	negative regulation of CD4-positive, alpha-beta T cell activation	21118	29706
2398	C10	TRUE	0.0462177	91	86	3	0.0348837	0.032967	GO:2000106	GO:BP	regulation of leukocyte apoptotic process	21118	29308
2458	C10	TRUE	0.0472983	288	86	5	0.0581395	0.0173611	GO:0042254	GO:BP	ribosome biogenesis	21118	11668
2520	C10	TRUE	0.0479582	30	86	2	0.0232558	0.0666667	GO:1902253	GO:BP	regulation of intrinsic apoptotic signaling pathway by p53 class mediator	21118	25464
2521	C10	TRUE	0.0479582	30	86	2	0.0232558	0.0666667	GO:0051491	GO:BP	positive regulation of filopodium assembly	21118	15930
2522	C10	TRUE	0.0479582	30	86	2	0.0232558	0.0666667	GO:0071353	GO:BP	cellular response to interleukin-4	21118	19438
2591	C10	TRUE	0.0497484	2	86	1	0.0116279	0.5	GO:1990683	GO:BP	DNA double-strand break attachment to nuclear envelope	21118	29054
2592	C10	TRUE	0.0497484	2	86	1	0.0116279	0.5	GO:2000537	GO:BP	regulation of B cell chemotaxis	21118	29728
2593	C10	TRUE	0.0497484	2	86	1	0.0116279	0.5	GO:2000538	GO:BP	positive regulation of B cell chemotaxis	21118	29729
2594	C10	TRUE	0.0497484	101	86	3	0.0348837	0.029703	GO:0002181	GO:BP	cytoplasmic translation	21118	859
2595	C10	TRUE	0.0497484	704	86	8	0.0930233	0.0113636	GO:0032990	GO:BP	cell part morphogenesis	21118	9204
2596	C10	TRUE	0.0497484	96	86	3	0.0348837	0.03125	GO:2001237	GO:BP	negative regulation of extrinsic apoptotic signaling pathway	21118	30379
2597	C10	TRUE	0.0497484	2	86	1	0.0116279	0.5	GO:1905956	GO:BP	positive regulation of endothelial tube morphogenesis	21118	28780
2598	C10	TRUE	0.0497484	97	86	3	0.0348837	0.0309278	GO:0001843	GO:BP	neural tube closure	21118	621
2599	C10	TRUE	0.0497484	2	86	1	0.0116279	0.5	GO:0001766	GO:BP	membrane raft polarization	21118	553
2600	C10	TRUE	0.0497484	2	86	1	0.0116279	0.5	GO:2001188	GO:BP	regulation of T cell activation via T cell receptor contact with antigen bound to MHC molecule on antigen presenting cell	21118	30334
2601	C10	TRUE	0.0497484	2	86	1	0.0116279	0.5	GO:1900756	GO:BP	protein processing in phagocytic vesicle	21118	24056
2602	C10	TRUE	0.0497484	2	86	1	0.0116279	0.5	GO:1900138	GO:BP	negative regulation of phospholipase A2 activity	21118	23457
2603	C10	TRUE	0.0497484	98	86	3	0.0348837	0.0306122	GO:0060606	GO:BP	tube closure	21118	17416
2604	C10	TRUE	0.0497484	2	86	1	0.0116279	0.5	GO:0072355	GO:BP	histone H3-T3 phosphorylation	21118	20271
2605	C10	TRUE	0.0497484	2	86	1	0.0116279	0.5	GO:0044209	GO:BP	AMP salvage	21118	12722
2606	C10	TRUE	0.0497484	2	86	1	0.0116279	0.5	GO:0002519	GO:BP	natural killer cell tolerance induction	21118	1173
2607	C10	TRUE	0.0497484	2	86	1	0.0116279	0.5	GO:0044855	GO:BP	plasma membrane raft distribution	21118	13081
2608	C10	TRUE	0.0497484	2	86	1	0.0116279	0.5	GO:0044856	GO:BP	plasma membrane raft localization	21118	13082
2609	C10	TRUE	0.0497484	2	86	1	0.0116279	0.5	GO:0002399	GO:BP	MHC class II protein complex assembly	21118	1055
2610	C10	TRUE	0.0497484	2	86	1	0.0116279	0.5	GO:0002503	GO:BP	peptide antigen assembly with MHC class II protein complex	21118	1158
2611	C10	TRUE	0.0497484	32	86	2	0.0232558	0.0625	GO:0002828	GO:BP	regulation of type 2 immune response	21118	1471
2612	C10	TRUE	0.0497484	2	86	1	0.0116279	0.5	GO:0030505	GO:BP	inorganic diphosphate transport	21118	7903
2613	C10	TRUE	0.0497484	2	86	1	0.0116279	0.5	GO:0006168	GO:BP	adenine salvage	21118	2197
2614	C10	TRUE	0.0497484	33	86	2	0.0232558	0.0606061	GO:0070670	GO:BP	response to interleukin-4	21118	19054
2615	C10	TRUE	0.0497484	100	86	3	0.0348837	0.03	GO:0006906	GO:BP	vesicle fusion	21118	2860
2616	C10	TRUE	0.0497484	2	86	1	0.0116279	0.5	GO:1903923	GO:BP	positive regulation of protein processing in phagocytic vesicle	21118	26910
2617	C10	TRUE	0.0497484	2	86	1	0.0116279	0.5	GO:0006850	GO:BP	mitochondrial pyruvate transmembrane transport	21118	2811
2618	C10	TRUE	0.0497484	2	86	1	0.0116279	0.5	GO:0006713	GO:BP	glucocorticoid catabolic process	21118	2694
2619	C10	TRUE	0.0497484	2	86	1	0.0116279	0.5	GO:0007172	GO:BP	signal complex assembly	21118	3085
2620	C10	TRUE	0.0497484	2	86	1	0.0116279	0.5	GO:1903921	GO:BP	regulation of protein processing in phagocytic vesicle	21118	26908
111	C3	TRUE	2.02622e-07	80	61	9	0.147541	0.1125	KEGG:05416	KEGG	Viral myocarditis	8790	469
112	C3	TRUE	2.02622e-07	173	61	12	0.196721	0.0693642	KEGG:04145	KEGG	Phagosome	8790	262
113	C3	TRUE	2.02622e-07	82	61	9	0.147541	0.109756	KEGG:04612	KEGG	Antigen processing and presentation	8790	302
132	C3	TRUE	3.69128e-07	42	61	7	0.114754	0.166667	KEGG:04672	KEGG	Intestinal immune network for IgA production	8790	324
133	C3	TRUE	3.69128e-07	24	61	6	0.0983607	0.25	KEGG:05310	KEGG	Asthma	8790	457
182	C3	TRUE	2.157e-06	55	61	7	0.114754	0.127273	KEGG:05332	KEGG	Graft-versus-host disease	8790	463
287	C3	TRUE	2.98011e-05	171	61	9	0.147541	0.0526316	KEGG:05164	KEGG	Influenza A	8790	423
288	C3	TRUE	3.03331e-05	110	95	8	0.0842105	0.0727273	GO:0019882	GO:BP	antigen processing and presentation	21118	7017
396	C3	TRUE	0.000155042	223	61	9	0.147541	0.0403587	KEGG:05169	KEGG	Epstein-Barr virus infection	8790	428
751	C3	TRUE	0.00242423	1077	95	17	0.178947	0.0157846	GO:0043603	GO:BP	cellular amide metabolic process	21118	12472
970	C3	TRUE	0.00556382	835	95	14	0.147368	0.0167665	GO:0006518	GO:BP	peptide metabolic process	21118	2505
1310	C3	TRUE	0.0141324	21	95	3	0.0315789	0.142857	GO:0010499	GO:BP	proteasomal ubiquitin-independent protein catabolic process	21118	4679
1311	C3	TRUE	0.0141324	4	95	2	0.0210526	0.5	GO:0150111	GO:BP	regulation of transepithelial transport	21118	23271
1312	C3	TRUE	0.0141324	4	95	2	0.0210526	0.5	GO:0090272	GO:BP	negative regulation of fibroblast growth factor production	21118	21342
1353	C3	TRUE	0.0146815	58	95	4	0.0421053	0.0689655	GO:0061077	GO:BP	chaperone-mediated protein folding	21118	17870
1434	C3	TRUE	0.0179881	442	61	9	0.147541	0.020362	KEGG:05168	KEGG	Herpes simplex virus 1 infection	8790	427
1546	C3	TRUE	0.0225315	47	61	3	0.0491803	0.0638298	KEGG:03050	KEGG	Proteasome	8790	214
2147	C3	TRUE	0.0377363	8	95	2	0.0210526	0.25	GO:0090269	GO:BP	fibroblast growth factor production	21118	21339
2148	C3	TRUE	0.0377363	8	95	2	0.0210526	0.25	GO:0031204	GO:BP	posttranslational protein targeting to membrane, translocation	21118	8242
2149	C3	TRUE	0.0377363	8	95	2	0.0210526	0.25	GO:0090270	GO:BP	regulation of fibroblast growth factor production	21118	21340
2534	C3	TRUE	0.0490989	162	95	5	0.0526316	0.0308642	GO:0006457	GO:BP	protein folding	21118	2450
2537	C3	TRUE	0.0493753	10	95	2	0.0210526	0.2	GO:0060484	GO:BP	lung-associated mesenchyme development	21118	17300
2590	C3	TRUE	0.0496632	120	61	4	0.0655738	0.0333333	KEGG:04919	KEGG	Thyroid hormone signaling pathway	8790	355
1	C5	TRUE	5.60949e-22	2807	120	64	0.533333	0.0228001	GO:0002376	GO:BP	immune system process	21118	1038
2	C5	TRUE	1.04991e-20	1857	120	52	0.433333	0.0280022	GO:0006955	GO:BP	immune response	21118	2901
3	C5	TRUE	6.51692e-19	1705	120	48	0.4	0.0281525	GO:0006952	GO:BP	defense response	21118	2898
4	C5	TRUE	1.51739e-17	2912	120	59	0.491667	0.020261	GO:0009605	GO:BP	response to external stimulus	21118	3990
5	C5	TRUE	1.00385e-16	1601	120	44	0.366667	0.0274828	GO:0009607	GO:BP	response to biotic stimulus	21118	3992
6	C5	TRUE	2.19125e-16	1565	120	43	0.358333	0.027476	GO:0043207	GO:BP	response to external biotic stimulus	21118	12235
7	C5	TRUE	2.19125e-16	1562	120	43	0.358333	0.0275288	GO:0051707	GO:BP	response to other organism	21118	16102
8	C5	TRUE	4.77003e-16	1688	120	44	0.366667	0.0260664	GO:0044419	GO:BP	biological process involved in interspecies interaction between organisms	21118	12824
9	C5	TRUE	3.30988e-15	732	120	30	0.25	0.0409836	GO:0006954	GO:BP	inflammatory response	21118	2900
10	C5	TRUE	8.52501e-15	1406	120	39	0.325	0.0277383	GO:0002682	GO:BP	regulation of immune system process	21118	1332
11	C5	TRUE	5.6961e-13	237	120	18	0.15	0.0759494	GO:0071219	GO:BP	cellular response to molecule of bacterial origin	21118	19310
12	C5	TRUE	6.32037e-13	2788	120	51	0.425	0.0182927	GO:0051239	GO:BP	regulation of multicellular organismal process	21118	15743
13	C5	TRUE	9.87969e-13	1140	120	33	0.275	0.0289474	GO:0098542	GO:BP	defense response to other organism	21118	22049
14	C5	TRUE	9.87969e-13	2198	120	45	0.375	0.0204732	GO:0048584	GO:BP	positive regulation of response to stimulus	21118	14941
15	C5	TRUE	1.13553e-12	724	120	27	0.225	0.0372928	GO:0001817	GO:BP	regulation of cytokine production	21118	595
16	C5	TRUE	1.13553e-12	3418	120	56	0.466667	0.0163839	GO:0010033	GO:BP	response to organic substance	21118	4320
17	C5	TRUE	1.29178e-12	731	120	27	0.225	0.0369357	GO:0001816	GO:BP	cytokine production	21118	594
18	C5	TRUE	1.59567e-12	3817	120	59	0.491667	0.0154572	GO:0006950	GO:BP	response to stress	21118	2897
19	C5	TRUE	1.62474e-12	947	120	30	0.25	0.031679	GO:0002684	GO:BP	positive regulation of immune system process	21118	1334
20	C5	TRUE	1.81037e-12	262	120	18	0.15	0.0687023	GO:0071216	GO:BP	cellular response to biotic stimulus	21118	19307
21	C5	TRUE	2.21584e-12	404	120	21	0.175	0.0519802	GO:0032103	GO:BP	positive regulation of response to external stimulus	21118	8568
22	C5	TRUE	2.87635e-12	230	120	17	0.141667	0.073913	GO:0071222	GO:BP	cellular response to lipopolysaccharide	21118	19313
23	C5	TRUE	2.98902e-12	904	120	29	0.241667	0.0320796	GO:0032101	GO:BP	regulation of response to external stimulus	21118	8566
24	C5	TRUE	4.97538e-12	3097	120	52	0.433333	0.0167904	GO:0070887	GO:BP	cellular response to chemical stimulus	21118	19167
25	C5	TRUE	4.97538e-12	374	120	20	0.166667	0.0534759	GO:0032496	GO:BP	response to lipopolysaccharide	21118	8827
26	C5	TRUE	5.66992e-12	2453	120	46	0.383333	0.0187525	GO:0071310	GO:BP	cellular response to organic substance	21118	19397
27	C5	TRUE	6.46436e-12	866	120	28	0.233333	0.0323326	GO:0045087	GO:BP	innate immune response	21118	13159
28	C5	TRUE	7.00839e-12	1171	120	32	0.266667	0.0273271	GO:0010628	GO:BP	positive regulation of gene expression	21118	4786
29	C5	TRUE	9.41391e-12	390	120	20	0.166667	0.0512821	GO:0002237	GO:BP	response to molecule of bacterial origin	21118	902
30	C5	TRUE	1.12646e-11	1115	120	31	0.258333	0.0278027	GO:0001775	GO:BP	cell activation	21118	561
31	C5	TRUE	1.68047e-11	1555	120	36	0.3	0.0231511	GO:0051240	GO:BP	positive regulation of multicellular organismal process	21118	15744
32	C5	TRUE	2.39895e-11	361	120	19	0.158333	0.0526316	GO:0050900	GO:BP	leukocyte migration	21118	15459
33	C5	TRUE	2.41067e-11	3851	120	57	0.475	0.0148014	GO:0048583	GO:BP	regulation of response to stimulus	21118	14940
34	C5	TRUE	2.47782e-11	1491	120	35	0.291667	0.0234742	GO:0016477	GO:BP	cell migration	21118	5837
35	C5	TRUE	3.26047e-11	935	120	28	0.233333	0.0299465	GO:0034097	GO:BP	response to cytokine	21118	9696
36	C5	TRUE	8.66077e-11	1653	120	36	0.3	0.0217786	GO:0051674	GO:BP	localization of cell	21118	16076
37	C5	TRUE	8.66077e-11	1653	120	36	0.3	0.0217786	GO:0048870	GO:BP	cell motility	21118	15204
38	C5	TRUE	1.08532e-10	986	120	28	0.233333	0.0283976	GO:2000145	GO:BP	regulation of cell motility	21118	29347
39	C5	TRUE	1.6115e-10	462	120	20	0.166667	0.04329	GO:0001819	GO:BP	positive regulation of cytokine production	21118	597
40	C5	TRUE	1.86857e-10	934	120	27	0.225	0.0289079	GO:0030334	GO:BP	regulation of cell migration	21118	7836
41	C5	TRUE	1.91913e-10	220	120	15	0.125	0.0681818	GO:0097529	GO:BP	myeloid leukocyte migration	21118	21929
43	C5	TRUE	2.41368e-10	148	120	13	0.108333	0.0878378	GO:0002687	GO:BP	positive regulation of leukocyte migration	21118	1337
44	C5	TRUE	3.0634e-10	1035	120	28	0.233333	0.0270531	GO:0040012	GO:BP	regulation of locomotion	21118	11495
45	C5	TRUE	3.40812e-10	1839	120	37	0.308333	0.0201196	GO:0040011	GO:BP	locomotion	21118	11494
46	C5	TRUE	7.04014e-10	1074	120	28	0.233333	0.0260708	GO:0051270	GO:BP	regulation of cellular component movement	21118	15765
47	C5	TRUE	8.38667e-10	1083	120	28	0.233333	0.0258541	GO:0051241	GO:BP	negative regulation of multicellular organismal process	21118	15745
48	C5	TRUE	9.20903e-10	51	120	9	0.075	0.176471	GO:0001774	GO:BP	microglial cell activation	21118	560
49	C5	TRUE	1.12618e-09	1444	120	32	0.266667	0.0221607	GO:2000026	GO:BP	regulation of multicellular organismal development	21118	29229
50	C5	TRUE	1.30719e-09	2136	120	39	0.325	0.0182584	GO:0008219	GO:BP	cell death	21118	3573
51	C5	TRUE	1.76749e-09	216	120	14	0.116667	0.0648148	GO:0002685	GO:BP	regulation of leukocyte migration	21118	1335
52	C5	TRUE	2.3101e-09	2075	120	38	0.316667	0.0183133	GO:0006928	GO:BP	movement of cell or subcellular component	21118	2879
53	C5	TRUE	2.42575e-09	822	120	24	0.2	0.0291971	GO:0071345	GO:BP	cellular response to cytokine stimulus	21118	19430
54	C5	TRUE	2.61287e-09	980	120	26	0.216667	0.0265306	GO:0033993	GO:BP	response to lipid	21118	9659
55	C5	TRUE	3.40132e-09	557	120	20	0.166667	0.0359066	GO:0030335	GO:BP	positive regulation of cell migration	21118	7837
56	C5	TRUE	3.59098e-09	996	120	26	0.216667	0.0261044	GO:0045321	GO:BP	leukocyte activation	21118	13259
58	C5	TRUE	4.41851e-09	2673	120	43	0.358333	0.0160868	GO:0007166	GO:BP	cell surface receptor signaling pathway	21118	3079
59	C5	TRUE	5.45016e-09	6305	120	70	0.583333	0.0111023	GO:0048518	GO:BP	positive regulation of biological process	21118	14885
60	C5	TRUE	6.57403e-09	581	120	20	0.166667	0.0344234	GO:2000147	GO:BP	positive regulation of cell motility	21118	29349
62	C5	TRUE	9.55089e-09	163	120	12	0.1	0.0736196	GO:0032675	GO:BP	regulation of interleukin-6 production	21118	8948
63	C5	TRUE	9.55089e-09	163	120	12	0.1	0.0736196	GO:0032635	GO:BP	interleukin-6 production	21118	8908
64	C5	TRUE	1.02311e-08	598	120	20	0.166667	0.0334448	GO:0040017	GO:BP	positive regulation of locomotion	21118	11500
65	C5	TRUE	1.02311e-08	598	120	20	0.166667	0.0334448	GO:0051272	GO:BP	positive regulation of cellular component movement	21118	15767
66	C5	TRUE	1.19581e-08	1506	120	31	0.258333	0.0205843	GO:0009967	GO:BP	positive regulation of signal transduction	21118	4280
67	C5	TRUE	1.19581e-08	304	120	15	0.125	0.0493421	GO:0060326	GO:BP	cell chemotaxis	21118	17151
68	C5	TRUE	1.26174e-08	256	120	14	0.116667	0.0546875	GO:0031349	GO:BP	positive regulation of defense response	21118	8306
69	C5	TRUE	1.26174e-08	902	120	24	0.2	0.0266075	GO:0009617	GO:BP	response to bacterium	21118	4001
70	C5	TRUE	1.49268e-08	1247	120	28	0.233333	0.0224539	GO:1901701	GO:BP	cellular response to oxygen-containing compound	21118	24938
71	C5	TRUE	1.58072e-08	134	120	11	0.0916667	0.0820896	GO:0050729	GO:BP	positive regulation of inflammatory response	21118	15326
72	C5	TRUE	2.38218e-08	1015	120	25	0.208333	0.0246305	GO:0002520	GO:BP	immune system development	21118	1174
73	C5	TRUE	2.47044e-08	1753	120	33	0.275	0.0188249	GO:0042127	GO:BP	regulation of cell population proliferation	21118	11585
75	C5	TRUE	3.12719e-08	1975	120	35	0.291667	0.0177215	GO:0012501	GO:BP	programmed cell death	21118	5130
76	C5	TRUE	3.15675e-08	574	120	19	0.158333	0.033101	GO:0002521	GO:BP	leukocyte differentiation	21118	1175
77	C5	TRUE	3.16286e-08	575	120	19	0.158333	0.0330435	GO:0031347	GO:BP	regulation of defense response	21118	8304
78	C5	TRUE	3.16286e-08	53	120	8	0.0666667	0.150943	GO:0031663	GO:BP	lipopolysaccharide-mediated signaling pathway	21118	8453
79	C5	TRUE	3.34496e-08	953	120	24	0.2	0.0251836	GO:0048534	GO:BP	hematopoietic or lymphoid organ development	21118	14899
80	C5	TRUE	3.50822e-08	131	82	13	0.158537	0.0992366	KEGG:04142	KEGG	Lysosome	8790	260
81	C5	TRUE	4.60096e-08	969	120	24	0.2	0.0247678	GO:1902533	GO:BP	positive regulation of intracellular signal transduction	21118	25686
84	C5	TRUE	6.18731e-08	347	120	15	0.125	0.0432277	GO:0050727	GO:BP	regulation of inflammatory response	21118	15324
85	C5	TRUE	6.34299e-08	1725	120	32	0.266667	0.0185507	GO:0010647	GO:BP	positive regulation of cell communication	21118	4805
86	C5	TRUE	6.58474e-08	9950	120	89	0.741667	0.00894472	GO:0050896	GO:BP	response to stimulus	21118	15456
87	C5	TRUE	6.81076e-08	1732	120	32	0.266667	0.0184758	GO:0023056	GO:BP	positive regulation of signaling	21118	7675
88	C5	TRUE	6.81076e-08	909	120	23	0.191667	0.0253025	GO:0030097	GO:BP	hemopoiesis	21118	7723
89	C5	TRUE	7.47929e-08	1740	120	32	0.266667	0.0183908	GO:0010941	GO:BP	regulation of cell death	21118	5075
90	C5	TRUE	7.69794e-08	683	120	20	0.166667	0.0292826	GO:0002252	GO:BP	immune effector process	21118	916
91	C5	TRUE	9.1928e-08	419	120	16	0.133333	0.0381862	GO:0019221	GO:BP	cytokine-mediated signaling pathway	21118	6495
92	C5	TRUE	9.31207e-08	123	120	10	0.0833333	0.0813008	GO:0002688	GO:BP	regulation of leukocyte chemotaxis	21118	1338
94	C5	TRUE	1.03855e-07	12686	120	102	0.85	0.00804036	GO:0050789	GO:BP	regulation of biological process	21118	15367
95	C5	TRUE	1.07493e-07	5544	120	62	0.516667	0.0111833	GO:0048519	GO:BP	negative regulation of biological process	21118	14886
97	C5	TRUE	1.37288e-07	1587	120	30	0.25	0.0189036	GO:0043067	GO:BP	regulation of programmed cell death	21118	12164
98	C5	TRUE	1.71488e-07	172	120	11	0.0916667	0.0639535	GO:0032640	GO:BP	tumor necrosis factor production	21118	8913
99	C5	TRUE	1.71488e-07	172	120	11	0.0916667	0.0639535	GO:0032680	GO:BP	regulation of tumor necrosis factor production	21118	8953
103	C5	TRUE	1.88698e-07	1919	120	33	0.275	0.0171965	GO:0006915	GO:BP	apoptotic process	21118	2868
104	C5	TRUE	1.92641e-07	98	120	9	0.075	0.0918367	GO:0002690	GO:BP	positive regulation of leukocyte chemotaxis	21118	1340
105	C5	TRUE	1.92792e-07	220	120	12	0.1	0.0545455	GO:0030595	GO:BP	leukocyte chemotaxis	21118	7942
106	C5	TRUE	1.92929e-07	175	120	11	0.0916667	0.0628571	GO:1903555	GO:BP	regulation of tumor necrosis factor superfamily cytokine production	21118	26583
107	C5	TRUE	1.92929e-07	1820	120	32	0.266667	0.0175824	GO:1901700	GO:BP	response to oxygen-containing compound	21118	24937
108	C5	TRUE	1.92929e-07	175	120	11	0.0916667	0.0628571	GO:0071706	GO:BP	tumor necrosis factor superfamily cytokine production	21118	19741
109	C5	TRUE	1.94437e-07	2591	120	39	0.325	0.0150521	GO:0050793	GO:BP	regulation of developmental process	21118	15370
110	C5	TRUE	1.96097e-07	1619	120	30	0.25	0.01853	GO:0009719	GO:BP	response to endogenous stimulus	21118	4080
114	C5	TRUE	2.08533e-07	5068	120	58	0.483333	0.0114444	GO:0048523	GO:BP	negative regulation of cellular process	21118	14890
115	C5	TRUE	2.20838e-07	2491	120	38	0.316667	0.0152549	GO:0035556	GO:BP	intracellular signal transduction	21118	10495
116	C5	TRUE	2.27563e-07	101	120	9	0.075	0.0891089	GO:0042116	GO:BP	macrophage activation	21118	11576
118	C5	TRUE	2.43215e-07	2853	120	41	0.341667	0.0143708	GO:0009966	GO:BP	regulation of signal transduction	21118	4279
120	C5	TRUE	2.7216e-07	5544	120	61	0.508333	0.0110029	GO:0042221	GO:BP	response to chemical	21118	11657
124	C5	TRUE	3.11032e-07	464	120	16	0.133333	0.0344828	GO:0002443	GO:BP	leukocyte mediated immunity	21118	1098
125	C5	TRUE	3.11032e-07	105	120	9	0.075	0.0857143	GO:0032755	GO:BP	positive regulation of interleukin-6 production	21118	9028
126	C5	TRUE	3.17148e-07	3760	120	48	0.4	0.012766	GO:0009893	GO:BP	positive regulation of metabolic process	21118	4226
127	C5	TRUE	3.32282e-07	234	120	12	0.1	0.0512821	GO:0002274	GO:BP	myeloid leukocyte activation	21118	938
128	C5	TRUE	3.33105e-07	13374	120	104	0.866667	0.00777628	GO:0065007	GO:BP	biological regulation	21118	18663
131	C5	TRUE	3.56401e-07	5441	120	60	0.5	0.0110274	GO:0007275	GO:BP	multicellular organism development	21118	3179
136	C5	TRUE	4.31021e-07	148	120	10	0.0833333	0.0675676	GO:0050921	GO:BP	positive regulation of chemotaxis	21118	15480
141	C5	TRUE	5.96451e-07	422	120	15	0.125	0.035545	GO:0002683	GO:BP	negative regulation of immune system process	21118	1333
144	C5	TRUE	6.2099e-07	1412	120	27	0.225	0.0191218	GO:0051094	GO:BP	positive regulation of developmental process	21118	15617
146	C5	TRUE	6.68158e-07	1045	120	23	0.191667	0.0220096	GO:0008284	GO:BP	positive regulation of cell population proliferation	21118	3581
147	C5	TRUE	6.8891e-07	5987	120	63	0.525	0.0105228	GO:0048856	GO:BP	anatomical structure development	21118	15191
152	C5	TRUE	8.42975e-07	2868	120	40	0.333333	0.013947	GO:0032879	GO:BP	regulation of localization	21118	9109
155	C5	TRUE	9.7467e-07	811	120	20	0.166667	0.0246609	GO:0050776	GO:BP	regulation of immune response	21118	15359
156	C5	TRUE	1.10431e-06	380	120	14	0.116667	0.0368421	GO:1903706	GO:BP	regulation of hemopoiesis	21118	26730
159	C5	TRUE	1.14645e-06	446	120	15	0.125	0.0336323	GO:1903131	GO:BP	mononuclear cell differentiation	21118	26209
160	C5	TRUE	1.16435e-06	3029	120	41	0.341667	0.0135358	GO:0065009	GO:BP	regulation of molecular function	21118	18665
162	C5	TRUE	1.35391e-06	18	120	5	0.0416667	0.277778	GO:0150146	GO:BP	cell junction disassembly	21118	23290
163	C5	TRUE	1.38708e-06	1678	120	29	0.241667	0.0172825	GO:0044093	GO:BP	positive regulation of molecular function	21118	12675
164	C5	TRUE	1.48934e-06	12140	120	97	0.808333	0.00799012	GO:0050794	GO:BP	regulation of cellular process	21118	15371
165	C5	TRUE	1.53451e-06	922	120	21	0.175	0.0227766	GO:0045597	GO:BP	positive regulation of cell differentiation	21118	13371
166	C5	TRUE	1.53451e-06	600	120	17	0.141667	0.0283333	GO:0006935	GO:BP	chemotaxis	21118	2886
171	C5	TRUE	1.63603e-06	603	120	17	0.141667	0.0281924	GO:0071396	GO:BP	cellular response to lipid	21118	19481
172	C5	TRUE	1.70269e-06	605	120	17	0.141667	0.0280992	GO:0042330	GO:BP	taxis	21118	11707
173	C5	TRUE	1.72281e-06	174	120	10	0.0833333	0.0574713	GO:0071674	GO:BP	mononuclear cell migration	21118	19714
174	C5	TRUE	1.82282e-06	224	120	11	0.0916667	0.0491071	GO:0097191	GO:BP	extrinsic apoptotic signaling pathway	21118	21754
175	C5	TRUE	1.84052e-06	3467	120	44	0.366667	0.0126911	GO:0010604	GO:BP	positive regulation of macromolecule metabolic process	21118	4763
176	C5	TRUE	1.87896e-06	225	120	11	0.0916667	0.0488889	GO:0050920	GO:BP	regulation of chemotaxis	21118	15479
177	C5	TRUE	1.92766e-06	8	120	4	0.0333333	0.5	GO:0098883	GO:BP	synapse pruning	21118	22200
179	C5	TRUE	1.99183e-06	771	120	19	0.158333	0.0246433	GO:0000165	GO:BP	MAPK cascade	21118	72
185	C5	TRUE	2.29501e-06	344	120	13	0.108333	0.0377907	GO:0070371	GO:BP	ERK1 and ERK2 cascade	21118	18874
186	C5	TRUE	2.56667e-06	105	82	10	0.121951	0.0952381	KEGG:04064	KEGG	NF-kappa B signaling pathway	8790	237
187	C5	TRUE	2.59414e-06	4876	120	54	0.45	0.0110747	GO:0048731	GO:BP	system development	21118	15076
188	C5	TRUE	2.7904e-06	3265	120	42	0.35	0.0128637	GO:0010646	GO:BP	regulation of cell communication	21118	4804
189	C5	TRUE	2.7904e-06	6536	120	65	0.541667	0.00994492	GO:0032502	GO:BP	developmental process	21118	8832
190	C5	TRUE	2.86171e-06	963	120	21	0.175	0.0218069	GO:0022603	GO:BP	regulation of anatomical structure morphogenesis	21118	7618
194	C5	TRUE	3.00976e-06	3276	120	42	0.35	0.0128205	GO:0023051	GO:BP	regulation of signaling	21118	7670
195	C5	TRUE	3.1495e-06	1649	120	28	0.233333	0.01698	GO:0045595	GO:BP	regulation of cell differentiation	21118	13369
198	C5	TRUE	3.32103e-06	1550	120	27	0.225	0.0174194	GO:0042981	GO:BP	regulation of apoptotic process	21118	12103
199	C5	TRUE	3.35759e-06	143	120	9	0.075	0.0629371	GO:0034341	GO:BP	response to interferon-gamma	21118	9881
203	C5	TRUE	3.94578e-06	4378	120	50	0.416667	0.0114207	GO:0030154	GO:BP	cell differentiation	21118	7739
214	C5	TRUE	5.5151e-06	1005	120	21	0.175	0.0208955	GO:0051050	GO:BP	positive regulation of transport	21118	15587
215	C5	TRUE	5.5151e-06	152	120	9	0.075	0.0592105	GO:0097530	GO:BP	granulocyte migration	21118	21930
217	C5	TRUE	5.65831e-06	3617	120	44	0.366667	0.0121648	GO:0048513	GO:BP	animal organ development	21118	14880
218	C5	TRUE	5.79696e-06	46	120	6	0.05	0.130435	GO:0097028	GO:BP	dendritic cell differentiation	21118	21662
219	C5	TRUE	6.03295e-06	516	120	15	0.125	0.0290698	GO:0043410	GO:BP	positive regulation of MAPK cascade	21118	12340
221	C5	TRUE	6.53741e-06	4454	120	50	0.416667	0.0112259	GO:0048869	GO:BP	cellular developmental process	21118	15203
223	C5	TRUE	7.22958e-06	8351	120	75	0.625	0.00898096	GO:0051716	GO:BP	cellular response to stimulus	21118	16110
226	C5	TRUE	7.26999e-06	158	120	9	0.075	0.056962	GO:0002221	GO:BP	pattern recognition receptor signaling pathway	21118	887
227	C5	TRUE	7.29377e-06	1119	120	22	0.183333	0.0196604	GO:0060548	GO:BP	negative regulation of cell death	21118	17364
232	C5	TRUE	8.12027e-06	606	120	16	0.133333	0.0264026	GO:0050778	GO:BP	positive regulation of immune response	21118	15361
235	C5	TRUE	9.08749e-06	268	120	11	0.0916667	0.0410448	GO:0001818	GO:BP	negative regulation of cytokine production	21118	596
239	C5	TRUE	1.00023e-05	120	120	8	0.0666667	0.0666667	GO:0045807	GO:BP	positive regulation of endocytosis	21118	13571
244	C5	TRUE	1.18051e-05	705	120	17	0.141667	0.0241135	GO:0030036	GO:BP	actin cytoskeleton organization	21118	7705
248	C5	TRUE	1.27031e-05	124	120	8	0.0666667	0.0645161	GO:1990266	GO:BP	neutrophil migration	21118	28891
249	C5	TRUE	1.27645e-05	406	120	13	0.108333	0.0320197	GO:0070997	GO:BP	neuron death	21118	19243
250	C5	TRUE	1.37695e-05	2715	120	36	0.3	0.0132597	GO:0009653	GO:BP	anatomical structure morphogenesis	21118	4034
251	C5	TRUE	1.47314e-05	225	120	10	0.0833333	0.0444444	GO:0070374	GO:BP	positive regulation of ERK1 and ERK2 cascade	21118	18877
252	C5	TRUE	1.49473e-05	6841	120	65	0.541667	0.00950153	GO:0019222	GO:BP	regulation of metabolic process	21118	6496
255	C5	TRUE	1.6951e-05	4888	120	52	0.433333	0.0106383	GO:0010468	GO:BP	regulation of gene expression	21118	4662
258	C5	TRUE	1.80284e-05	289	120	11	0.0916667	0.0380623	GO:0030336	GO:BP	negative regulation of cell migration	21118	7838
261	C5	TRUE	1.88619e-05	57	120	6	0.05	0.105263	GO:1905517	GO:BP	macrophage migration	21118	28381
262	C5	TRUE	1.94553e-05	103	82	9	0.109756	0.0873786	KEGG:05142	KEGG	Chagas disease	8790	412
263	C5	TRUE	1.94553e-05	77	82	8	0.097561	0.103896	KEGG:05133	KEGG	Pertussis	8790	408
264	C5	TRUE	1.96843e-05	1002	120	20	0.166667	0.0199601	GO:0043069	GO:BP	negative regulation of programmed cell death	21118	12166
265	C5	TRUE	1.96843e-05	292	120	11	0.0916667	0.0376712	GO:1902105	GO:BP	regulation of leukocyte differentiation	21118	25327
266	C5	TRUE	2.07349e-05	7227	120	67	0.558333	0.00927079	GO:0023052	GO:BP	signaling	21118	7671
267	C5	TRUE	2.07721e-05	235	120	10	0.0833333	0.0425532	GO:0071559	GO:BP	response to transforming growth factor beta	21118	19622
272	C5	TRUE	2.15997e-05	741	120	17	0.141667	0.022942	GO:0034330	GO:BP	cell junction organization	21118	9873
273	C5	TRUE	2.18146e-05	1105	120	21	0.175	0.0190045	GO:0010629	GO:BP	negative regulation of gene expression	21118	4787
276	C5	TRUE	2.32534e-05	94	120	7	0.0583333	0.0744681	GO:0014910	GO:BP	regulation of smooth muscle cell migration	21118	5348
279	C5	TRUE	2.45776e-05	6780	120	64	0.533333	0.00943953	GO:0007165	GO:BP	signal transduction	21118	3078
281	C5	TRUE	2.67426e-05	303	120	11	0.0916667	0.0363036	GO:2000146	GO:BP	negative regulation of cell motility	21118	29348
282	C5	TRUE	2.67426e-05	15	120	4	0.0333333	0.266667	GO:0060100	GO:BP	positive regulation of phagocytosis, engulfment	21118	16960
283	C5	TRUE	2.67426e-05	15	120	4	0.0333333	0.266667	GO:1905155	GO:BP	positive regulation of membrane invagination	21118	28038
284	C5	TRUE	2.74064e-05	34	120	5	0.0416667	0.147059	GO:1902624	GO:BP	positive regulation of neutrophil migration	21118	25758
285	C5	TRUE	2.76937e-05	97	120	7	0.0583333	0.0721649	GO:1901222	GO:BP	regulation of NIK/NF-kappaB signaling	21118	24512
286	C5	TRUE	2.77253e-05	7291	120	67	0.558333	0.00918941	GO:0007154	GO:BP	cell communication	21118	3067
293	C5	TRUE	3.57145e-05	313	120	11	0.0916667	0.0351438	GO:0051271	GO:BP	negative regulation of cellular component movement	21118	15766
294	C5	TRUE	3.80714e-05	102	120	7	0.0583333	0.0686275	GO:0014909	GO:BP	smooth muscle cell migration	21118	5347
296	C5	TRUE	3.88536e-05	5933	120	58	0.483333	0.00977583	GO:0010467	GO:BP	gene expression	21118	4661
309	C5	TRUE	4.43686e-05	67	120	6	0.05	0.0895522	GO:1901224	GO:BP	positive regulation of NIK/NF-kappaB signaling	21118	24514
310	C5	TRUE	4.57043e-05	462	120	13	0.108333	0.0281385	GO:0050867	GO:BP	positive regulation of cell activation	21118	15432
313	C5	TRUE	4.78004e-05	106	120	7	0.0583333	0.0660377	GO:0001909	GO:BP	leukocyte mediated cytotoxicity	21118	651
314	C5	TRUE	4.78761e-05	792	120	17	0.141667	0.0214646	GO:0030029	GO:BP	actin filament-based process	21118	7698
315	C5	TRUE	4.87721e-05	325	120	11	0.0916667	0.0338462	GO:0070372	GO:BP	regulation of ERK1 and ERK2 cascade	21118	18875
318	C5	TRUE	5.09296e-05	980	120	19	0.158333	0.0193878	GO:0043066	GO:BP	negative regulation of apoptotic process	21118	12163
320	C5	TRUE	5.38927e-05	18	120	4	0.0333333	0.222222	GO:0060099	GO:BP	regulation of phagocytosis, engulfment	21118	16959
326	C5	TRUE	6.11364e-05	403	120	12	0.1	0.0297767	GO:0002253	GO:BP	activation of immune response	21118	917
329	C5	TRUE	6.15901e-05	288	82	13	0.158537	0.0451389	KEGG:04060	KEGG	Cytokine-cytokine receptor interaction	8790	234
330	C5	TRUE	6.15901e-05	92	82	8	0.097561	0.0869565	KEGG:04061	KEGG	Viral protein interaction with cytokine and cytokine receptor	8790	235
331	C5	TRUE	6.48401e-05	336	120	11	0.0916667	0.0327381	GO:0040013	GO:BP	negative regulation of locomotion	21118	11496
332	C5	TRUE	6.54208e-05	112	120	7	0.0583333	0.0625	GO:0032612	GO:BP	interleukin-1 production	21118	8885
333	C5	TRUE	6.54208e-05	112	120	7	0.0583333	0.0625	GO:0032652	GO:BP	regulation of interleukin-1 production	21118	8925
334	C5	TRUE	6.60041e-05	19	120	4	0.0333333	0.210526	GO:1905153	GO:BP	regulation of membrane invagination	21118	28036
336	C5	TRUE	6.8424e-05	113	120	7	0.0583333	0.0619469	GO:0002224	GO:BP	toll-like receptor signaling pathway	21118	890
338	C5	TRUE	6.99811e-05	6363	120	60	0.5	0.00942951	GO:0060255	GO:BP	regulation of macromolecule metabolic process	21118	17082
339	C5	TRUE	7.05091e-05	42	120	5	0.0416667	0.119048	GO:0032733	GO:BP	positive regulation of interleukin-10 production	21118	9006
340	C5	TRUE	7.06101e-05	912	120	18	0.15	0.0197368	GO:0009725	GO:BP	response to hormone	21118	4086
344	C5	TRUE	7.51144e-05	115	120	7	0.0583333	0.0608696	GO:0014812	GO:BP	muscle cell migration	21118	5256
345	C5	TRUE	7.51144e-05	217	120	9	0.075	0.0414747	GO:0045637	GO:BP	regulation of myeloid cell differentiation	21118	13411
347	C5	TRUE	7.55562e-05	70	82	7	0.0853659	0.1	KEGG:05221	KEGG	Acute myeloid leukemia	8790	448
348	C5	TRUE	7.79548e-05	43	120	5	0.0416667	0.116279	GO:1905521	GO:BP	regulation of macrophage migration	21118	28385
350	C5	TRUE	8.1742e-05	165	120	8	0.0666667	0.0484848	GO:0001906	GO:BP	cell killing	21118	649
353	C5	TRUE	8.42799e-05	136	82	9	0.109756	0.0661765	KEGG:04210	KEGG	Apoptosis	8790	267
356	C5	TRUE	9.08279e-05	119	120	7	0.0583333	0.0588235	GO:0071346	GO:BP	cellular response to interferon-gamma	21118	19431
357	C5	TRUE	9.08279e-05	168	120	8	0.0666667	0.047619	GO:0045766	GO:BP	positive regulation of angiogenesis	21118	13534
358	C5	TRUE	9.08279e-05	119	120	7	0.0583333	0.0588235	GO:0038061	GO:BP	NIK/NF-kappaB signaling	21118	11197
359	C5	TRUE	9.08279e-05	168	120	8	0.0666667	0.047619	GO:1904018	GO:BP	positive regulation of vasculature development	21118	26992
360	C5	TRUE	9.14916e-05	78	120	6	0.05	0.0769231	GO:0097192	GO:BP	extrinsic apoptotic signaling pathway in absence of ligand	21118	21755
361	C5	TRUE	9.14916e-05	78	120	6	0.05	0.0769231	GO:0038034	GO:BP	signal transduction in absence of ligand	21118	11189
366	C5	TRUE	0.000102195	7	120	3	0.025	0.428571	GO:1904139	GO:BP	regulation of microglial cell migration	21118	27105
367	C5	TRUE	0.000102195	7	120	3	0.025	0.428571	GO:1904124	GO:BP	microglial cell migration	21118	27090
368	C5	TRUE	0.000102398	46	120	5	0.0416667	0.108696	GO:1902622	GO:BP	regulation of neutrophil migration	21118	25756
374	C5	TRUE	0.000108394	173	120	8	0.0666667	0.0462428	GO:1902107	GO:BP	positive regulation of leukocyte differentiation	21118	25329
375	C5	TRUE	0.000108394	173	120	8	0.0666667	0.0462428	GO:1903708	GO:BP	positive regulation of hemopoiesis	21118	26732
376	C5	TRUE	0.000112525	1249	120	21	0.175	0.0168135	GO:1901565	GO:BP	organonitrogen compound catabolic process	21118	24825
378	C5	TRUE	0.000117181	82	120	6	0.05	0.0731707	GO:0070098	GO:BP	chemokine-mediated signaling pathway	21118	18690
379	C5	TRUE	0.000118451	364	120	11	0.0916667	0.0302198	GO:0032956	GO:BP	regulation of actin cytoskeleton organization	21118	9174
380	C5	TRUE	0.00012266	126	120	7	0.0583333	0.0555556	GO:0071621	GO:BP	granulocyte chemotaxis	21118	19668
381	C5	TRUE	0.000123981	517	120	13	0.108333	0.0251451	GO:0009611	GO:BP	response to wounding	21118	3996
385	C5	TRUE	0.000135994	8483	120	72	0.6	0.00848756	GO:0032501	GO:BP	multicellular organismal process	21118	8831
386	C5	TRUE	0.000137079	1268	120	21	0.175	0.0165615	GO:0043085	GO:BP	positive regulation of catalytic activity	21118	12169
390	C5	TRUE	0.000150461	2421	120	31	0.258333	0.0128046	GO:0007399	GO:BP	nervous system development	21118	3289
394	C5	TRUE	0.00015454	131	120	7	0.0583333	0.0534351	GO:0002705	GO:BP	positive regulation of leukocyte mediated immunity	21118	1355
395	C5	TRUE	0.00015454	450	120	12	0.1	0.0266667	GO:0002696	GO:BP	positive regulation of leukocyte activation	21118	1346
401	C5	TRUE	0.00016116	2308	120	30	0.25	0.0129983	GO:0050790	GO:BP	regulation of catalytic activity	21118	15368
405	C5	TRUE	0.000170252	380	120	11	0.0916667	0.0289474	GO:0042060	GO:BP	wound healing	21118	11547
406	C5	TRUE	0.000173098	381	120	11	0.0916667	0.0288714	GO:2001233	GO:BP	regulation of apoptotic signaling pathway	21118	30375
412	C5	TRUE	0.000183368	313	120	10	0.0833333	0.0319489	GO:0043270	GO:BP	positive regulation of ion transport	21118	12253
420	C5	TRUE	0.000202686	388	120	11	0.0916667	0.0283505	GO:0010038	GO:BP	response to metal ion	21118	4325
423	C5	TRUE	0.000209207	3239	120	37	0.308333	0.0114233	GO:0009892	GO:BP	negative regulation of metabolic process	21118	4225
424	C5	TRUE	0.000210578	241	82	11	0.134146	0.0456432	KEGG:05171	KEGG	Coronavirus disease - COVID-19	8790	430
426	C5	TRUE	0.000216839	9	120	3	0.025	0.333333	GO:0071223	GO:BP	cellular response to lipoteichoic acid	21118	19314
427	C5	TRUE	0.000216839	9	120	3	0.025	0.333333	GO:0070391	GO:BP	response to lipoteichoic acid	21118	18884
428	C5	TRUE	0.000218575	93	120	6	0.05	0.0645161	GO:1990868	GO:BP	response to chemokine	21118	29143
429	C5	TRUE	0.000218575	93	120	6	0.05	0.0645161	GO:0032651	GO:BP	regulation of interleukin-1 beta production	21118	8924
430	C5	TRUE	0.000218575	93	120	6	0.05	0.0645161	GO:1990869	GO:BP	cellular response to chemokine	21118	29144
431	C5	TRUE	0.000218575	55	120	5	0.0416667	0.0909091	GO:0032655	GO:BP	regulation of interleukin-12 production	21118	8928
432	C5	TRUE	0.000218575	55	120	5	0.0416667	0.0909091	GO:0032615	GO:BP	interleukin-12 production	21118	8888
433	C5	TRUE	0.000218575	93	120	6	0.05	0.0645161	GO:0032611	GO:BP	interleukin-1 beta production	21118	8884
436	C5	TRUE	0.000230656	94	120	6	0.05	0.0638298	GO:0032642	GO:BP	regulation of chemokine production	21118	8915
437	C5	TRUE	0.000237571	2999	120	35	0.291667	0.0116706	GO:0010605	GO:BP	negative regulation of macromolecule metabolic process	21118	4764
439	C5	TRUE	0.000237702	474	120	12	0.1	0.0253165	GO:0050808	GO:BP	synapse organization	21118	15383
440	C5	TRUE	0.000237702	397	120	11	0.0916667	0.0277078	GO:0030098	GO:BP	lymphocyte differentiation	21118	7724
441	C5	TRUE	0.000241176	197	120	8	0.0666667	0.0406091	GO:0050731	GO:BP	positive regulation of peptidyl-tyrosine phosphorylation	21118	15328
442	C5	TRUE	0.000241176	95	120	6	0.05	0.0631579	GO:0032602	GO:BP	chemokine production	21118	8875
445	C5	TRUE	0.000251801	57	120	5	0.0416667	0.0877193	GO:0032653	GO:BP	regulation of interleukin-10 production	21118	8926
446	C5	TRUE	0.000251801	57	120	5	0.0416667	0.0877193	GO:0032613	GO:BP	interleukin-10 production	21118	8886
447	C5	TRUE	0.000253331	1776	120	25	0.208333	0.0140766	GO:0022008	GO:BP	neurogenesis	21118	7567
450	C5	TRUE	0.000264072	200	120	8	0.0666667	0.04	GO:0031032	GO:BP	actomyosin structure organization	21118	8133
451	C5	TRUE	0.000265127	403	120	11	0.0916667	0.0272953	GO:0030099	GO:BP	myeloid cell differentiation	21118	7725
457	C5	TRUE	0.000277315	332	120	10	0.0833333	0.0301205	GO:0002764	GO:BP	immune response-regulating signaling pathway	21118	1408
458	C5	TRUE	0.000285501	29	120	4	0.0333333	0.137931	GO:0014912	GO:BP	negative regulation of smooth muscle cell migration	21118	5350
459	C5	TRUE	0.00028552	147	120	7	0.0583333	0.047619	GO:2001235	GO:BP	positive regulation of apoptotic signaling pathway	21118	30377
469	C5	TRUE	0.000303011	410	120	11	0.0916667	0.0268293	GO:0032970	GO:BP	regulation of actin filament-based process	21118	9187
471	C5	TRUE	0.000310367	60	120	5	0.0416667	0.0833333	GO:0032757	GO:BP	positive regulation of interleukin-8 production	21118	9030
472	C5	TRUE	0.00032585	944	120	17	0.141667	0.0180085	GO:0030163	GO:BP	protein catabolic process	21118	7743
476	C5	TRUE	0.000337211	102	120	6	0.05	0.0588235	GO:0045639	GO:BP	positive regulation of myeloid cell differentiation	21118	13413
477	C5	TRUE	0.000337211	102	120	6	0.05	0.0588235	GO:0030593	GO:BP	neutrophil chemotaxis	21118	7941
480	C5	TRUE	0.000342538	342	120	10	0.0833333	0.0292398	GO:0042063	GO:BP	gliogenesis	21118	11549
486	C5	TRUE	0.00035398	103	120	6	0.05	0.0582524	GO:0032760	GO:BP	positive regulation of tumor necrosis factor production	21118	9033
487	C5	TRUE	0.000360848	31	120	4	0.0333333	0.129032	GO:0045672	GO:BP	positive regulation of osteoclast differentiation	21118	13446
490	C5	TRUE	0.000370195	1056	120	18	0.15	0.0170455	GO:0000902	GO:BP	cell morphogenesis	21118	306
491	C5	TRUE	0.000370195	154	120	7	0.0583333	0.0454545	GO:0008360	GO:BP	regulation of cell shape	21118	3612
492	C5	TRUE	0.000389427	105	120	6	0.05	0.0571429	GO:1903557	GO:BP	positive regulation of tumor necrosis factor superfamily cytokine production	21118	26585
493	C5	TRUE	0.000408321	64	120	5	0.0416667	0.078125	GO:0008347	GO:BP	glial cell migration	21118	3605
498	C5	TRUE	0.000428953	107	120	6	0.05	0.0560748	GO:0072676	GO:BP	lymphocyte migration	21118	20444
503	C5	TRUE	0.000449781	108	120	6	0.05	0.0555556	GO:0032649	GO:BP	regulation of interferon-gamma production	21118	8922
504	C5	TRUE	0.000449781	778	120	15	0.125	0.0192802	GO:0030162	GO:BP	regulation of proteolysis	21118	7742
509	C5	TRUE	0.000469944	109	120	6	0.05	0.0550459	GO:0032609	GO:BP	interferon-gamma production	21118	8882
510	C5	TRUE	0.000472891	12	120	3	0.025	0.25	GO:0036005	GO:BP	response to macrophage colony-stimulating factor	21118	10844
511	C5	TRUE	0.000472891	12	120	3	0.025	0.25	GO:0036006	GO:BP	cellular response to macrophage colony-stimulating factor stimulus	21118	10845
512	C5	TRUE	0.000472891	12	120	3	0.025	0.25	GO:1903980	GO:BP	positive regulation of microglial cell activation	21118	26962
514	C5	TRUE	0.000495667	604	120	13	0.108333	0.0215232	GO:0010035	GO:BP	response to inorganic substance	21118	4322
515	C5	TRUE	0.000495667	982	120	17	0.141667	0.0173116	GO:0045937	GO:BP	positive regulation of phosphate metabolic process	21118	13689
516	C5	TRUE	0.000495667	982	120	17	0.141667	0.0173116	GO:0010562	GO:BP	positive regulation of phosphorus metabolic process	21118	4726
519	C5	TRUE	0.000508273	223	120	8	0.0666667	0.0358744	GO:0034612	GO:BP	response to tumor necrosis factor	21118	10008
520	C5	TRUE	0.000508273	223	120	8	0.0666667	0.0358744	GO:0030100	GO:BP	regulation of endocytosis	21118	7726
524	C5	TRUE	0.000520216	68	120	5	0.0416667	0.0735294	GO:0032722	GO:BP	positive regulation of chemokine production	21118	8995
525	C5	TRUE	0.000521283	224	120	8	0.0666667	0.0357143	GO:0043542	GO:BP	endothelial cell migration	21118	12432
528	C5	TRUE	0.000548824	35	120	4	0.0333333	0.114286	GO:0050850	GO:BP	positive regulation of calcium-mediated signaling	21118	15415
533	C5	TRUE	0.000585425	13	120	3	0.025	0.230769	GO:1904753	GO:BP	negative regulation of vascular associated smooth muscle cell migration	21118	27671
534	C5	TRUE	0.000585425	13	120	3	0.025	0.230769	GO:0001660	GO:BP	fever generation	21118	493
535	C5	TRUE	0.000585425	13	120	3	0.025	0.230769	GO:0150078	GO:BP	positive regulation of neuroinflammatory response	21118	23253
538	C5	TRUE	0.000603235	36	120	4	0.0333333	0.111111	GO:0050999	GO:BP	regulation of nitric-oxide synthase activity	21118	15556
540	C5	TRUE	0.000605375	6073	120	55	0.458333	0.00905648	GO:0031323	GO:BP	regulation of cellular metabolic process	21118	8281
542	C5	TRUE	0.000613293	371	120	10	0.0833333	0.0269542	GO:0002449	GO:BP	lymphocyte mediated immunity	21118	1104
543	C5	TRUE	0.000618392	903	120	16	0.133333	0.0177187	GO:0042327	GO:BP	positive regulation of phosphorylation	21118	11706
545	C5	TRUE	0.000623851	231	120	8	0.0666667	0.034632	GO:0071560	GO:BP	cellular response to transforming growth factor beta stimulus	21118	19623
558	C5	TRUE	0.000722325	38	120	4	0.0333333	0.105263	GO:0010573	GO:BP	vascular endothelial growth factor production	21118	4737
559	C5	TRUE	0.000722325	38	120	4	0.0333333	0.105263	GO:0032692	GO:BP	negative regulation of interleukin-1 production	21118	8965
565	C5	TRUE	0.000785483	384	120	10	0.0833333	0.0260417	GO:0018108	GO:BP	peptidyl-tyrosine phosphorylation	21118	6023
569	C5	TRUE	0.000800231	385	120	10	0.0833333	0.025974	GO:0002460	GO:BP	adaptive immune response based on somatic recombination of immune receptors built from immunoglobulin superfamily domains	21118	1115
573	C5	TRUE	0.000821295	830	120	15	0.125	0.0180723	GO:0001934	GO:BP	positive regulation of protein phosphorylation	21118	673
574	C5	TRUE	0.000821295	387	120	10	0.0833333	0.0258398	GO:0018212	GO:BP	peptidyl-tyrosine modification	21118	6114
578	C5	TRUE	0.000851489	77	120	5	0.0416667	0.0649351	GO:0032677	GO:BP	regulation of interleukin-8 production	21118	8950
579	C5	TRUE	0.000851489	40	120	4	0.0333333	0.1	GO:2000249	GO:BP	regulation of actin cytoskeleton reorganization	21118	29449
580	C5	TRUE	0.000851489	77	120	5	0.0416667	0.0649351	GO:0032637	GO:BP	interleukin-8 production	21118	8910
587	C5	TRUE	0.000873303	1038	120	17	0.141667	0.0163776	GO:0051093	GO:BP	negative regulation of developmental process	21118	15616
592	C5	TRUE	0.000908195	189	82	9	0.109756	0.047619	KEGG:04062	KEGG	Chemokine signaling pathway	8790	236
593	C5	TRUE	0.000914942	126	120	6	0.05	0.047619	GO:0061041	GO:BP	regulation of wound healing	21118	17834
613	C5	TRUE	0.00100889	3	120	2	0.0166667	0.666667	GO:0002316	GO:BP	follicular B cell differentiation	21118	980
614	C5	TRUE	0.00100889	3	120	2	0.0166667	0.666667	GO:0150062	GO:BP	complement-mediated synapse pruning	21118	23237
615	C5	TRUE	0.00100889	3	120	2	0.0166667	0.666667	GO:0060559	GO:BP	positive regulation of calcidiol 1-monooxygenase activity	21118	17372
616	C5	TRUE	0.00100889	3	120	2	0.0166667	0.666667	GO:0071727	GO:BP	cellular response to triacyl bacterial lipopeptide	21118	19759
617	C5	TRUE	0.00100889	3	120	2	0.0166667	0.666667	GO:0071725	GO:BP	response to triacyl bacterial lipopeptide	21118	19757
618	C5	TRUE	0.00100889	3	120	2	0.0166667	0.666667	GO:0043378	GO:BP	positive regulation of CD8-positive, alpha-beta T cell differentiation	21118	12317
619	C5	TRUE	0.00100889	16	120	3	0.025	0.1875	GO:0051044	GO:BP	positive regulation of membrane protein ectodomain proteolysis	21118	15581
628	C5	TRUE	0.00107789	43	120	4	0.0333333	0.0930233	GO:0045601	GO:BP	regulation of endothelial cell differentiation	21118	13375
630	C5	TRUE	0.00109012	82	120	5	0.0416667	0.0609756	GO:0046209	GO:BP	nitric oxide metabolic process	21118	13953
634	C5	TRUE	0.00115193	329	120	9	0.075	0.0273556	GO:0002768	GO:BP	immune response-regulating cell surface receptor signaling pathway	21118	1412
635	C5	TRUE	0.00115829	44	120	4	0.0333333	0.0909091	GO:0001937	GO:BP	negative regulation of endothelial cell proliferation	21118	676
636	C5	TRUE	0.00118142	1177	120	18	0.15	0.0152931	GO:0009628	GO:BP	response to abiotic stimulus	21118	4009
637	C5	TRUE	0.00119739	84	120	5	0.0416667	0.0595238	GO:2001057	GO:BP	reactive nitrogen species metabolic process	21118	30231
638	C5	TRUE	0.00119739	6090	120	54	0.45	0.008867	GO:0016043	GO:BP	cellular component organization	21118	5665
655	C5	TRUE	0.0013563	249	82	10	0.121951	0.0401606	KEGG:05163	KEGG	Human cytomegalovirus infection	8790	422
657	C5	TRUE	0.00137405	18	120	3	0.025	0.166667	GO:1900221	GO:BP	regulation of amyloid-beta clearance	21118	23536
658	C5	TRUE	0.00137405	18	120	3	0.025	0.166667	GO:0034138	GO:BP	toll-like receptor 3 signaling pathway	21118	9734
664	C5	TRUE	0.00140364	1651	120	22	0.183333	0.0133253	GO:0006468	GO:BP	protein phosphorylation	21118	2459
672	C5	TRUE	0.00146292	200	120	7	0.0583333	0.035	GO:0048771	GO:BP	tissue remodeling	21118	15110
684	C5	TRUE	0.00161095	272	120	8	0.0666667	0.0294118	GO:0030217	GO:BP	T cell differentiation	21118	7779
688	C5	TRUE	0.00166992	49	120	4	0.0333333	0.0816327	GO:0032768	GO:BP	regulation of monooxygenase activity	21118	9039
690	C5	TRUE	0.00168668	5706	120	51	0.425	0.00893796	GO:0051171	GO:BP	regulation of nitrogen compound metabolic process	21118	15686
691	C5	TRUE	0.00171907	211	82	9	0.109756	0.042654	KEGG:05202	KEGG	Transcriptional misregulation in cancer	8790	432
699	C5	TRUE	0.00178835	1223	120	18	0.15	0.0147179	GO:0009968	GO:BP	negative regulation of signal transduction	21118	4281
703	C5	TRUE	0.00180575	20	120	3	0.025	0.15	GO:0007252	GO:BP	I-kappaB phosphorylation	21118	3158
704	C5	TRUE	0.00180575	4	120	2	0.0166667	0.5	GO:0071726	GO:BP	cellular response to diacyl bacterial lipopeptide	21118	19758
705	C5	TRUE	0.00180575	4	120	2	0.0166667	0.5	GO:0071724	GO:BP	response to diacyl bacterial lipopeptide	21118	19756
706	C5	TRUE	0.00180575	4	120	2	0.0166667	0.5	GO:2001199	GO:BP	negative regulation of dendritic cell differentiation	21118	30345
707	C5	TRUE	0.00180575	4	120	2	0.0166667	0.5	GO:1904466	GO:BP	positive regulation of matrix metallopeptidase secretion	21118	27412
708	C5	TRUE	0.00180575	4	120	2	0.0166667	0.5	GO:1904093	GO:BP	negative regulation of autophagic cell death	21118	27063
709	C5	TRUE	0.00184439	5886	120	52	0.433333	0.00883452	GO:0080090	GO:BP	regulation of primary metabolic process	21118	20913
714	C5	TRUE	0.00189005	280	120	8	0.0666667	0.0285714	GO:0097305	GO:BP	response to alcohol	21118	21822
715	C5	TRUE	0.00189707	148	120	6	0.05	0.0405405	GO:0070665	GO:BP	positive regulation of leukocyte proliferation	21118	19049
734	C5	TRUE	0.00209715	214	120	7	0.0583333	0.0327103	GO:0043491	GO:BP	protein kinase B signaling	21118	12406
742	C5	TRUE	0.00217802	1359	120	19	0.158333	0.0139809	GO:0010648	GO:BP	negative regulation of cell communication	21118	4806
744	C5	TRUE	0.00222891	1362	120	19	0.158333	0.0139501	GO:0023057	GO:BP	negative regulation of signaling	21118	7676
748	C5	TRUE	0.00234156	22	120	3	0.025	0.136364	GO:0051043	GO:BP	regulation of membrane protein ectodomain proteolysis	21118	15580
752	C5	TRUE	0.00243203	292	120	8	0.0666667	0.0273973	GO:0050708	GO:BP	regulation of protein secretion	21118	15321
753	C5	TRUE	0.00243203	6270	120	54	0.45	0.00861244	GO:0071840	GO:BP	cellular component organization or biogenesis	21118	19815
754	C5	TRUE	0.0024348	60	82	5	0.0609756	0.0833333	KEGG:05134	KEGG	Legionellosis	8790	409
755	C5	TRUE	0.00251413	101	120	5	0.0416667	0.049505	GO:1902106	GO:BP	negative regulation of leukocyte differentiation	21118	25328
757	C5	TRUE	0.00255252	17828	120	114	0.95	0.00639444	GO:0009987	GO:BP	cellular process	21118	4286
759	C5	TRUE	0.00255836	374	120	9	0.075	0.0240642	GO:0009306	GO:BP	protein secretion	21118	3899
760	C5	TRUE	0.00255836	56	120	4	0.0333333	0.0714286	GO:0002931	GO:BP	response to ischemia	21118	1572
761	C5	TRUE	0.00255836	23	120	3	0.025	0.130435	GO:1903978	GO:BP	regulation of microglial cell activation	21118	26960
762	C5	TRUE	0.00255836	158	120	6	0.05	0.0379747	GO:2001236	GO:BP	regulation of extrinsic apoptotic signaling pathway	21118	30378
763	C5	TRUE	0.00255836	56	120	4	0.0333333	0.0714286	GO:2001238	GO:BP	positive regulation of extrinsic apoptotic signaling pathway	21118	30380
764	C5	TRUE	0.00255836	23	120	3	0.025	0.130435	GO:1903975	GO:BP	regulation of glial cell migration	21118	26957
765	C5	TRUE	0.00255836	56	120	4	0.0333333	0.0714286	GO:0060760	GO:BP	positive regulation of response to cytokine stimulus	21118	17565
766	C5	TRUE	0.00257674	375	120	9	0.075	0.024	GO:0035592	GO:BP	establishment of protein localization to extracellular region	21118	10522
769	C5	TRUE	0.00265959	103	120	5	0.0416667	0.0485437	GO:1903707	GO:BP	negative regulation of hemopoiesis	21118	26731
771	C5	TRUE	0.00268508	57	120	4	0.0333333	0.0701754	GO:0061098	GO:BP	positive regulation of protein tyrosine kinase activity	21118	17891
772	C5	TRUE	0.00268508	1390	120	19	0.158333	0.0136691	GO:0007010	GO:BP	cytoskeleton organization	21118	2946
773	C5	TRUE	0.00268521	5	120	2	0.0166667	0.4	GO:0070339	GO:BP	response to bacterial lipopeptide	21118	18852
774	C5	TRUE	0.00268521	5	120	2	0.0166667	0.4	GO:0038145	GO:BP	macrophage colony-stimulating factor signaling pathway	21118	11244
775	C5	TRUE	0.00268521	5	120	2	0.0166667	0.4	GO:1903969	GO:BP	regulation of response to macrophage colony-stimulating factor	21118	26951
776	C5	TRUE	0.00268521	5	120	2	0.0166667	0.4	GO:1903972	GO:BP	regulation of cellular response to macrophage colony-stimulating factor stimulus	21118	26954
777	C5	TRUE	0.00268521	5	120	2	0.0166667	0.4	GO:0033092	GO:BP	positive regulation of immature T cell proliferation in thymus	21118	9275
778	C5	TRUE	0.00268521	5	120	2	0.0166667	0.4	GO:0043376	GO:BP	regulation of CD8-positive, alpha-beta T cell differentiation	21118	12315
779	C5	TRUE	0.00268521	5	120	2	0.0166667	0.4	GO:0071220	GO:BP	cellular response to bacterial lipoprotein	21118	19311
780	C5	TRUE	0.00268521	5	120	2	0.0166667	0.4	GO:0071221	GO:BP	cellular response to bacterial lipopeptide	21118	19312
784	C5	TRUE	0.0027761	301	120	8	0.0666667	0.0265781	GO:0002831	GO:BP	regulation of response to biotic stimulus	21118	1474
785	C5	TRUE	0.00279618	58	120	4	0.0333333	0.0689655	GO:0032623	GO:BP	interleukin-2 production	21118	8896
786	C5	TRUE	0.00279618	58	120	4	0.0333333	0.0689655	GO:0032663	GO:BP	regulation of interleukin-2 production	21118	8936
787	C5	TRUE	0.00280211	1283	120	18	0.15	0.0140296	GO:0009057	GO:BP	macromolecule catabolic process	21118	3673
788	C5	TRUE	0.00282685	382	120	9	0.075	0.0235602	GO:0071692	GO:BP	protein localization to extracellular region	21118	19727
789	C5	TRUE	0.00283865	1636	120	21	0.175	0.0128362	GO:0048699	GO:BP	generation of neurons	21118	15044
793	C5	TRUE	0.0028873	653	120	12	0.1	0.0183767	GO:0051345	GO:BP	positive regulation of hydrolase activity	21118	15831
803	C5	TRUE	0.00291566	59	120	4	0.0333333	0.0677966	GO:0014009	GO:BP	glial cell proliferation	21118	5140
804	C5	TRUE	0.00291566	59	120	4	0.0333333	0.0677966	GO:0051851	GO:BP	modulation by host of symbiont process	21118	16181
806	C5	TRUE	0.00295364	99	82	6	0.0731707	0.0606061	KEGG:04620	KEGG	Toll-like receptor signaling pathway	8790	305
807	C5	TRUE	0.00297739	165	120	6	0.05	0.0363636	GO:1903034	GO:BP	regulation of response to wounding	21118	26120
809	C5	TRUE	0.00303805	25	120	3	0.025	0.12	GO:0010447	GO:BP	response to acidic pH	21118	4643
810	C5	TRUE	0.00303805	1183	120	17	0.141667	0.0143702	GO:0051336	GO:BP	regulation of hydrolase activity	21118	15822
811	C5	TRUE	0.00303805	166	120	6	0.05	0.0361446	GO:0051017	GO:BP	actin filament bundle assembly	21118	15566
812	C5	TRUE	0.00304468	60	120	4	0.0333333	0.0666667	GO:0010596	GO:BP	negative regulation of endothelial cell migration	21118	4756
819	C5	TRUE	0.00318617	109	120	5	0.0416667	0.0458716	GO:0110020	GO:BP	regulation of actomyosin structure organization	21118	22690
822	C5	TRUE	0.00320605	168	120	6	0.05	0.0357143	GO:0007596	GO:BP	blood coagulation	21118	3470
823	C5	TRUE	0.003217	61	120	4	0.0333333	0.0655738	GO:0072678	GO:BP	T cell migration	21118	20446
825	C5	TRUE	0.00329503	169	120	6	0.05	0.035503	GO:0061572	GO:BP	actin filament bundle organization	21118	18315
830	C5	TRUE	0.00338315	313	120	8	0.0666667	0.0255591	GO:0019932	GO:BP	second-messenger-mediated signaling	21118	7039
832	C5	TRUE	0.00340292	395	120	9	0.075	0.0227848	GO:0042176	GO:BP	regulation of protein catabolic process	21118	11612
833	C5	TRUE	0.00340292	395	120	9	0.075	0.0227848	GO:0051090	GO:BP	regulation of DNA-binding transcription factor activity	21118	15613
835	C5	TRUE	0.00345691	171	120	6	0.05	0.0350877	GO:0050817	GO:BP	coagulation	21118	15388
836	C5	TRUE	0.00345691	171	120	6	0.05	0.0350877	GO:0007599	GO:BP	hemostasis	21118	3473
838	C5	TRUE	0.00347809	315	120	8	0.0666667	0.0253968	GO:0002429	GO:BP	immune response-activating cell surface receptor signaling pathway	21118	1084
839	C5	TRUE	0.00350798	63	120	4	0.0333333	0.0634921	GO:1990874	GO:BP	vascular associated smooth muscle cell proliferation	21118	29146
840	C5	TRUE	0.00350798	485	120	10	0.0833333	0.0206186	GO:0006874	GO:BP	cellular calcium ion homeostasis	21118	2830
841	C5	TRUE	0.00350798	172	120	6	0.05	0.0348837	GO:0048660	GO:BP	regulation of smooth muscle cell proliferation	21118	15006
842	C5	TRUE	0.00350798	63	120	4	0.0333333	0.0634921	GO:0014911	GO:BP	positive regulation of smooth muscle cell migration	21118	5349
843	C5	TRUE	0.00350798	112	120	5	0.0416667	0.0446429	GO:0043149	GO:BP	stress fiber assembly	21118	12209
844	C5	TRUE	0.00350798	63	120	4	0.0333333	0.0634921	GO:1904705	GO:BP	regulation of vascular associated smooth muscle cell proliferation	21118	27626
845	C5	TRUE	0.00350798	112	120	5	0.0416667	0.0446429	GO:0030038	GO:BP	contractile actin filament bundle assembly	21118	7707
846	C5	TRUE	0.00350798	316	120	8	0.0666667	0.0253165	GO:0002757	GO:BP	immune response-activating signal transduction	21118	1401
847	C5	TRUE	0.00350798	485	120	10	0.0833333	0.0206186	GO:0045860	GO:BP	positive regulation of protein kinase activity	21118	13618
849	C5	TRUE	0.00355876	6	120	2	0.0166667	0.333333	GO:2000503	GO:BP	positive regulation of natural killer cell chemotaxis	21118	29697
850	C5	TRUE	0.00355876	27	120	3	0.025	0.111111	GO:0010575	GO:BP	positive regulation of vascular endothelial growth factor production	21118	4739
851	C5	TRUE	0.00355876	6	120	2	0.0166667	0.333333	GO:1904141	GO:BP	positive regulation of microglial cell migration	21118	27107
852	C5	TRUE	0.00355876	6	120	2	0.0166667	0.333333	GO:1903721	GO:BP	positive regulation of I-kappaB phosphorylation	21118	26743
853	C5	TRUE	0.00355876	6	120	2	0.0166667	0.333333	GO:1900223	GO:BP	positive regulation of amyloid-beta clearance	21118	23538
854	C5	TRUE	0.00355876	6	120	2	0.0166667	0.333333	GO:0032493	GO:BP	response to bacterial lipoprotein	21118	8824
855	C5	TRUE	0.00355876	6	120	2	0.0166667	0.333333	GO:0035509	GO:BP	negative regulation of myosin-light-chain-phosphatase activity	21118	10466
856	C5	TRUE	0.00355876	27	120	3	0.025	0.111111	GO:0072677	GO:BP	eosinophil migration	21118	20445
857	C5	TRUE	0.00355876	6	120	2	0.0166667	0.333333	GO:0033091	GO:BP	positive regulation of immature T cell proliferation	21118	9274
858	C5	TRUE	0.00355876	27	120	3	0.025	0.111111	GO:0090023	GO:BP	positive regulation of neutrophil chemotaxis	21118	21109
861	C5	TRUE	0.00361618	64	120	4	0.0333333	0.0625	GO:0032720	GO:BP	negative regulation of tumor necrosis factor production	21118	8993
862	C5	TRUE	0.00361618	64	120	4	0.0333333	0.0625	GO:0030193	GO:BP	regulation of blood coagulation	21118	7758
863	C5	TRUE	0.00361618	64	120	4	0.0333333	0.0625	GO:0002763	GO:BP	positive regulation of myeloid leukocyte differentiation	21118	1407
869	C5	TRUE	0.00380716	176	120	6	0.05	0.0340909	GO:0006911	GO:BP	phagocytosis, engulfment	21118	2864
872	C5	TRUE	0.00386832	1938	120	23	0.191667	0.0118679	GO:0016310	GO:BP	phosphorylation	21118	5797
873	C5	TRUE	0.00389994	177	120	6	0.05	0.0338983	GO:0048659	GO:BP	smooth muscle cell proliferation	21118	15005
880	C5	TRUE	0.00398821	178	120	6	0.05	0.0337079	GO:0007179	GO:BP	transforming growth factor beta receptor signaling pathway	21118	3091
881	C5	TRUE	0.00398821	66	120	4	0.0333333	0.0606061	GO:1903556	GO:BP	negative regulation of tumor necrosis factor superfamily cytokine production	21118	26584
882	C5	TRUE	0.00398821	66	120	4	0.0333333	0.0606061	GO:1900046	GO:BP	regulation of hemostasis	21118	23365
883	C5	TRUE	0.00398821	66	120	4	0.0333333	0.0606061	GO:0031638	GO:BP	zymogen activation	21118	8429
884	C5	TRUE	0.0040194	117	120	5	0.0416667	0.042735	GO:0032874	GO:BP	positive regulation of stress-activated MAPK cascade	21118	9104
885	C5	TRUE	0.00406762	2731	120	29	0.241667	0.0106188	GO:0031324	GO:BP	negative regulation of cellular metabolic process	21118	8282
886	C5	TRUE	0.00407317	249	120	7	0.0583333	0.0281124	GO:0033002	GO:BP	muscle cell proliferation	21118	9206
888	C5	TRUE	0.00411325	499	120	10	0.0833333	0.0200401	GO:0055074	GO:BP	calcium ion homeostasis	21118	16829
891	C5	TRUE	0.00416698	67	120	4	0.0333333	0.0597015	GO:0045428	GO:BP	regulation of nitric oxide biosynthetic process	21118	13280
892	C5	TRUE	0.00416698	67	120	4	0.0333333	0.0597015	GO:0050818	GO:BP	regulation of coagulation	21118	15389
893	C5	TRUE	0.00416698	67	120	4	0.0333333	0.0597015	GO:0045123	GO:BP	cellular extravasation	21118	13178
894	C5	TRUE	0.00419439	29	120	3	0.025	0.103448	GO:0071624	GO:BP	positive regulation of granulocyte chemotaxis	21118	19671
895	C5	TRUE	0.00419439	29	120	3	0.025	0.103448	GO:0032801	GO:BP	receptor catabolic process	21118	9063
896	C5	TRUE	0.00419439	29	120	3	0.025	0.103448	GO:0031649	GO:BP	heat generation	21118	8440
897	C5	TRUE	0.00419439	29	120	3	0.025	0.103448	GO:0002675	GO:BP	positive regulation of acute inflammatory response	21118	1325
898	C5	TRUE	0.0042208	119	120	5	0.0416667	0.0420168	GO:0070304	GO:BP	positive regulation of stress-activated protein kinase signaling cascade	21118	18835
899	C5	TRUE	0.00427639	107	82	6	0.0731707	0.0560748	KEGG:05146	KEGG	Amoebiasis	8790	416
900	C5	TRUE	0.0043262	68	120	4	0.0333333	0.0588235	GO:0061045	GO:BP	negative regulation of wound healing	21118	17838
914	C5	TRUE	0.0045555	69	120	4	0.0333333	0.057971	GO:0080164	GO:BP	regulation of nitric oxide metabolic process	21118	20956
918	C5	TRUE	0.00461297	7	120	2	0.0166667	0.285714	GO:0035747	GO:BP	natural killer cell chemotaxis	21118	10635
919	C5	TRUE	0.00461297	7	120	2	0.0166667	0.285714	GO:0060558	GO:BP	regulation of calcidiol 1-monooxygenase activity	21118	17371
920	C5	TRUE	0.00461297	7	120	2	0.0166667	0.285714	GO:2001187	GO:BP	positive regulation of CD8-positive, alpha-beta T cell activation	21118	30333
921	C5	TRUE	0.00461297	7	120	2	0.0166667	0.285714	GO:1903719	GO:BP	regulation of I-kappaB phosphorylation	21118	26741
922	C5	TRUE	0.00461297	7	120	2	0.0166667	0.285714	GO:1904092	GO:BP	regulation of autophagic cell death	21118	27062
923	C5	TRUE	0.00461297	7	120	2	0.0166667	0.285714	GO:2000501	GO:BP	regulation of natural killer cell chemotaxis	21118	29695
925	C5	TRUE	0.00464139	185	120	6	0.05	0.0324324	GO:0099024	GO:BP	plasma membrane invagination	21118	22285
928	C5	TRUE	0.00479445	512	120	10	0.0833333	0.0195312	GO:0072503	GO:BP	cellular divalent inorganic cation homeostasis	21118	20361
939	C5	TRUE	0.00487429	187	120	6	0.05	0.0320856	GO:0050806	GO:BP	positive regulation of synaptic transmission	21118	15381
940	C5	TRUE	0.00491186	31	120	3	0.025	0.0967742	GO:0032770	GO:BP	positive regulation of monooxygenase activity	21118	9041
941	C5	TRUE	0.00491186	71	120	4	0.0333333	0.056338	GO:0001910	GO:BP	regulation of leukocyte mediated cytotoxicity	21118	652
942	C5	TRUE	0.00491186	71	120	4	0.0333333	0.056338	GO:0045670	GO:BP	regulation of osteoclast differentiation	21118	13444
943	C5	TRUE	0.00491186	31	120	3	0.025	0.0967742	GO:0032691	GO:BP	negative regulation of interleukin-1 beta production	21118	8964
957	C5	TRUE	0.00531477	32	120	3	0.025	0.09375	GO:0032743	GO:BP	positive regulation of interleukin-2 production	21118	9016
958	C5	TRUE	0.00531477	32	120	3	0.025	0.09375	GO:0043032	GO:BP	positive regulation of macrophage activation	21118	12135
959	C5	TRUE	0.00534907	73	120	4	0.0333333	0.0547945	GO:0007040	GO:BP	lysosome organization	21118	2970
960	C5	TRUE	0.00534907	127	120	5	0.0416667	0.0393701	GO:0051897	GO:BP	positive regulation of protein kinase B signaling	21118	16216
961	C5	TRUE	0.00534907	73	120	4	0.0333333	0.0547945	GO:0080171	GO:BP	lytic vacuole organization	21118	20963
963	C5	TRUE	0.00538797	192	120	6	0.05	0.03125	GO:0010324	GO:BP	membrane invagination	21118	4554
964	C5	TRUE	0.00538797	192	120	6	0.05	0.03125	GO:0019722	GO:BP	calcium-mediated signaling	21118	6955
965	C5	TRUE	0.00538797	4815	120	43	0.358333	0.00893043	GO:0044267	GO:BP	cellular protein metabolic process	21118	12744
967	C5	TRUE	0.00554247	74	120	4	0.0333333	0.0540541	GO:0050848	GO:BP	regulation of calcium-mediated signaling	21118	15413
968	C5	TRUE	0.00554247	74	120	4	0.0333333	0.0540541	GO:0032729	GO:BP	positive regulation of interferon-gamma production	21118	9002
969	C5	TRUE	0.00554247	74	120	4	0.0333333	0.0540541	GO:0045453	GO:BP	bone resorption	21118	13291
980	C5	TRUE	0.00568135	33	120	3	0.025	0.0909091	GO:1904752	GO:BP	regulation of vascular associated smooth muscle cell migration	21118	27670
984	C5	TRUE	0.00569976	8	120	2	0.0166667	0.25	GO:0035234	GO:BP	ectopic germ cell programmed cell death	21118	10281
985	C5	TRUE	0.00569976	8	120	2	0.0166667	0.25	GO:1990773	GO:BP	matrix metallopeptidase secretion	21118	29089
986	C5	TRUE	0.00569976	8	120	2	0.0166667	0.25	GO:0031622	GO:BP	positive regulation of fever generation	21118	8420
987	C5	TRUE	0.00569976	8	120	2	0.0166667	0.25	GO:0002314	GO:BP	germinal center B cell differentiation	21118	978
988	C5	TRUE	0.00569976	8	120	2	0.0166667	0.25	GO:0035507	GO:BP	regulation of myosin-light-chain-phosphatase activity	21118	10464
989	C5	TRUE	0.00569976	8	120	2	0.0166667	0.25	GO:1904464	GO:BP	regulation of matrix metallopeptidase secretion	21118	27410
990	C5	TRUE	0.00569976	8	120	2	0.0166667	0.25	GO:0061518	GO:BP	microglial cell proliferation	21118	18265
991	C5	TRUE	0.00569976	8	120	2	0.0166667	0.25	GO:2000646	GO:BP	positive regulation of receptor catabolic process	21118	29834
993	C5	TRUE	0.00573013	75	120	4	0.0333333	0.0533333	GO:0010633	GO:BP	negative regulation of epithelial cell migration	21118	4791
1009	C5	TRUE	0.00603823	533	120	10	0.0833333	0.0187617	GO:0072507	GO:BP	divalent inorganic cation homeostasis	21118	20365
1010	C5	TRUE	0.00603858	34	120	3	0.025	0.0882353	GO:1904738	GO:BP	vascular associated smooth muscle cell migration	21118	27656
1011	C5	TRUE	0.00603858	34	120	3	0.025	0.0882353	GO:0060441	GO:BP	epithelial tube branching involved in lung morphogenesis	21118	17258
1013	C5	TRUE	0.0060558	132	120	5	0.0416667	0.0378788	GO:0050671	GO:BP	positive regulation of lymphocyte proliferation	21118	15302
1014	C5	TRUE	0.0060558	132	120	5	0.0416667	0.0378788	GO:0060759	GO:BP	regulation of response to cytokine stimulus	21118	17564
1015	C5	TRUE	0.00617745	77	120	4	0.0333333	0.0519481	GO:0006809	GO:BP	nitric oxide biosynthetic process	21118	2778
1016	C5	TRUE	0.00617745	77	120	4	0.0333333	0.0519481	GO:0050810	GO:BP	regulation of steroid biosynthetic process	21118	15384
1017	C5	TRUE	0.00617745	77	120	4	0.0333333	0.0519481	GO:0008625	GO:BP	extrinsic apoptotic signaling pathway via death domain receptors	21118	3650
1019	C5	TRUE	0.00622289	735	120	12	0.1	0.0163265	GO:0051603	GO:BP	proteolysis involved in cellular protein catabolic process	21118	16012
1025	C5	TRUE	0.00641246	134	120	5	0.0416667	0.0373134	GO:0032946	GO:BP	positive regulation of mononuclear cell proliferation	21118	9165
1026	C5	TRUE	0.00643682	35	120	3	0.025	0.0857143	GO:0001782	GO:BP	B cell homeostasis	21118	568
1027	C5	TRUE	0.00643682	35	120	3	0.025	0.0857143	GO:0090022	GO:BP	regulation of neutrophil chemotaxis	21118	21108
1029	C5	TRUE	0.00657482	135	120	5	0.0416667	0.037037	GO:0001936	GO:BP	regulation of endothelial cell proliferation	21118	675
1032	C5	TRUE	0.00677294	136	120	5	0.0416667	0.0367647	GO:0050680	GO:BP	negative regulation of epithelial cell proliferation	21118	15311
1035	C5	TRUE	0.00683525	362	120	8	0.0666667	0.0220994	GO:0045862	GO:BP	positive regulation of proteolysis	21118	13620
1038	C5	TRUE	0.00691344	36	120	3	0.025	0.0833333	GO:0034142	GO:BP	toll-like receptor 4 signaling pathway	21118	9738
1039	C5	TRUE	0.00691344	36	120	3	0.025	0.0833333	GO:0045940	GO:BP	positive regulation of steroid metabolic process	21118	13692
1040	C5	TRUE	0.00692359	9	120	2	0.0166667	0.222222	GO:0035425	GO:BP	autocrine signaling	21118	10412
1041	C5	TRUE	0.00692359	9	120	2	0.0166667	0.222222	GO:0010692	GO:BP	regulation of alkaline phosphatase activity	21118	4848
1042	C5	TRUE	0.00692359	9	120	2	0.0166667	0.222222	GO:0002357	GO:BP	defense response to tumor cell	21118	1021
1043	C5	TRUE	0.00692359	9	120	2	0.0166667	0.222222	GO:0031666	GO:BP	positive regulation of lipopolysaccharide-mediated signaling pathway	21118	8456
1051	C5	TRUE	0.00705182	9484	120	71	0.591667	0.00748629	GO:0043170	GO:BP	macromolecule metabolic process	21118	12224
1052	C5	TRUE	0.00709494	282	120	7	0.0583333	0.0248227	GO:0050851	GO:BP	antigen receptor-mediated signaling pathway	21118	15416
1059	C5	TRUE	0.00728583	139	120	5	0.0416667	0.0359712	GO:0051928	GO:BP	positive regulation of calcium ion transport	21118	16236
1061	C5	TRUE	0.00729648	2059	120	23	0.191667	0.0111705	GO:0044248	GO:BP	cellular catabolic process	21118	12732
1065	C5	TRUE	0.00733734	37	120	3	0.025	0.0810811	GO:0032735	GO:BP	positive regulation of interleukin-12 production	21118	9008
1078	C5	TRUE	0.00785834	38	120	3	0.025	0.0789474	GO:0150077	GO:BP	regulation of neuroinflammatory response	21118	23252
1079	C5	TRUE	0.00785834	38	120	3	0.025	0.0789474	GO:0043537	GO:BP	negative regulation of blood vessel endothelial cell migration	21118	12430
1087	C5	TRUE	0.00807402	84	120	4	0.0333333	0.047619	GO:0043367	GO:BP	CD4-positive, alpha-beta T cell differentiation	21118	12306
1088	C5	TRUE	0.00807402	84	120	4	0.0333333	0.047619	GO:0051817	GO:BP	modulation of process of other organism involved in symbiotic interaction	21118	16158
1098	C5	TRUE	0.00827478	10	120	2	0.0166667	0.2	GO:2000822	GO:BP	regulation of behavioral fear response	21118	30002
1099	C5	TRUE	0.00827478	144	120	5	0.0416667	0.0347222	GO:0019233	GO:BP	sensory perception of pain	21118	6504
1100	C5	TRUE	0.00827478	10	120	2	0.0166667	0.2	GO:0043615	GO:BP	astrocyte cell migration	21118	12483
1101	C5	TRUE	0.00827478	10	120	2	0.0166667	0.2	GO:1903365	GO:BP	regulation of fear response	21118	26405
1102	C5	TRUE	0.00827478	10	120	2	0.0166667	0.2	GO:2001198	GO:BP	regulation of dendritic cell differentiation	21118	30344
1103	C5	TRUE	0.00827478	10	120	2	0.0166667	0.2	GO:0033084	GO:BP	regulation of immature T cell proliferation in thymus	21118	9267
1104	C5	TRUE	0.00827478	10	120	2	0.0166667	0.2	GO:0031620	GO:BP	regulation of fever generation	21118	8418
1105	C5	TRUE	0.00830557	85	120	4	0.0333333	0.0470588	GO:1903035	GO:BP	negative regulation of response to wounding	21118	26121
1106	C5	TRUE	0.00830557	85	120	4	0.0333333	0.0470588	GO:2001259	GO:BP	positive regulation of cation channel activity	21118	30401
1107	C5	TRUE	0.00832472	767	120	12	0.1	0.0156454	GO:0045596	GO:BP	negative regulation of cell differentiation	21118	13370
1111	C5	TRUE	0.008378	1956	120	22	0.183333	0.0112474	GO:0031328	GO:BP	positive regulation of cellular biosynthetic process	21118	8286
1131	C5	TRUE	0.00879578	10989	120	79	0.658333	0.00718901	GO:0071704	GO:BP	organic substance metabolic process	21118	19739
1134	C5	TRUE	0.00888943	40	120	3	0.025	0.075	GO:0045840	GO:BP	positive regulation of mitotic nuclear division	21118	13600
1136	C5	TRUE	0.00898201	87	120	4	0.0333333	0.045977	GO:0010827	GO:BP	regulation of glucose transmembrane transport	21118	4974
1151	C5	TRUE	0.00935455	88	120	4	0.0333333	0.0454545	GO:0019915	GO:BP	lipid storage	21118	7024
1152	C5	TRUE	0.0094645	41	120	3	0.025	0.0731707	GO:2000403	GO:BP	positive regulation of lymphocyte migration	21118	29600
1156	C5	TRUE	0.00970776	150	120	5	0.0416667	0.0333333	GO:0001935	GO:BP	endothelial cell proliferation	21118	674
1157	C5	TRUE	0.00974373	11	120	2	0.0166667	0.181818	GO:0002676	GO:BP	regulation of chronic inflammatory response	21118	1326
1158	C5	TRUE	0.00974373	11	120	2	0.0166667	0.181818	GO:0034154	GO:BP	toll-like receptor 7 signaling pathway	21118	9750
1159	C5	TRUE	0.00974373	11	120	2	0.0166667	0.181818	GO:0042747	GO:BP	circadian sleep/wake cycle, REM sleep	21118	11963
1160	C5	TRUE	0.00974373	11	120	2	0.0166667	0.181818	GO:0033080	GO:BP	immature T cell proliferation in thymus	21118	9263
1161	C5	TRUE	0.00974373	11	120	2	0.0166667	0.181818	GO:0036462	GO:BP	TRAIL-activated apoptotic signaling pathway	21118	11109
1162	C5	TRUE	0.00974373	11	120	2	0.0166667	0.181818	GO:0031642	GO:BP	negative regulation of myelination	21118	8433
1163	C5	TRUE	0.00974373	11	120	2	0.0166667	0.181818	GO:0090385	GO:BP	phagosome-lysosome fusion	21118	21452
1164	C5	TRUE	0.00974373	11	120	2	0.0166667	0.181818	GO:0032490	GO:BP	detection of molecule of bacterial origin	21118	8821
1186	C5	TRUE	0.0102837	91	120	4	0.0333333	0.043956	GO:0046889	GO:BP	positive regulation of lipid biosynthetic process	21118	14472
1188	C5	TRUE	0.0103354	225	120	6	0.05	0.0266667	GO:0045732	GO:BP	positive regulation of protein catabolic process	21118	13501
1190	C5	TRUE	0.0103929	393	120	8	0.0666667	0.0203562	GO:0051251	GO:BP	positive regulation of lymphocyte activation	21118	15752
1192	C5	TRUE	0.010448	5474	120	46	0.383333	0.00840336	GO:0019538	GO:BP	protein metabolic process	21118	6791
1200	C5	TRUE	0.0105304	43	120	3	0.025	0.0697674	GO:0006509	GO:BP	membrane protein ectodomain proteolysis	21118	2497
1201	C5	TRUE	0.0105319	307	120	7	0.0583333	0.0228013	GO:0009895	GO:BP	negative regulation of catabolic process	21118	4228
1202	C5	TRUE	0.0105319	92	120	4	0.0333333	0.0434783	GO:0031341	GO:BP	regulation of cell killing	21118	8298
1207	C5	TRUE	0.0111394	44	120	3	0.025	0.0681818	GO:0150076	GO:BP	neuroinflammatory response	21118	23251
1208	C5	TRUE	0.011212	230	120	6	0.05	0.026087	GO:2001234	GO:BP	negative regulation of apoptotic signaling pathway	21118	30376
1209	C5	TRUE	0.011212	12	120	2	0.0166667	0.166667	GO:2000644	GO:BP	regulation of receptor catabolic process	21118	29832
1210	C5	TRUE	0.011212	12	120	2	0.0166667	0.166667	GO:0031652	GO:BP	positive regulation of heat generation	21118	8443
1211	C5	TRUE	0.011212	12	120	2	0.0166667	0.166667	GO:0090209	GO:BP	negative regulation of triglyceride metabolic process	21118	21280
1212	C5	TRUE	0.011212	12	120	2	0.0166667	0.166667	GO:0034384	GO:BP	high-density lipoprotein particle clearance	21118	9911
1213	C5	TRUE	0.011212	12	120	2	0.0166667	0.166667	GO:0043312	GO:BP	neutrophil degranulation	21118	12281
1214	C5	TRUE	0.011212	12	120	2	0.0166667	0.166667	GO:0033083	GO:BP	regulation of immature T cell proliferation	21118	9266
1215	C5	TRUE	0.0112226	157	120	5	0.0416667	0.0318471	GO:0051592	GO:BP	response to calcium ion	21118	16001
1220	C5	TRUE	0.0113905	231	120	6	0.05	0.025974	GO:0051403	GO:BP	stress-activated MAPK cascade	21118	15870
1222	C5	TRUE	0.0115731	95	120	4	0.0333333	0.0421053	GO:0097306	GO:BP	cellular response to alcohol	21118	21823
1224	C5	TRUE	0.0116147	45	120	3	0.025	0.0666667	GO:0030195	GO:BP	negative regulation of blood coagulation	21118	7760
1246	C5	TRUE	0.0119386	96	120	4	0.0333333	0.0416667	GO:0051492	GO:BP	regulation of stress fiber assembly	21118	15931
1249	C5	TRUE	0.0122515	46	120	3	0.025	0.0652174	GO:0046638	GO:BP	positive regulation of alpha-beta T cell differentiation	21118	14298
1250	C5	TRUE	0.0122515	46	120	3	0.025	0.0652174	GO:0006953	GO:BP	acute-phase response	21118	2899
1251	C5	TRUE	0.0122515	46	120	3	0.025	0.0652174	GO:1900047	GO:BP	negative regulation of hemostasis	21118	23366
1268	C5	TRUE	0.012743	98	120	4	0.0333333	0.0408163	GO:0043535	GO:BP	regulation of blood vessel endothelial cell migration	21118	12428
1269	C5	TRUE	0.0127774	13	120	2	0.0166667	0.153846	GO:0061517	GO:BP	macrophage proliferation	21118	18264
1270	C5	TRUE	0.0127774	13	120	2	0.0166667	0.153846	GO:1902043	GO:BP	positive regulation of extrinsic apoptotic signaling pathway via death domain receptors	21118	25272
1271	C5	TRUE	0.0127774	13	120	2	0.0166667	0.153846	GO:2000727	GO:BP	positive regulation of cardiac muscle cell differentiation	21118	29908
1272	C5	TRUE	0.0127774	13	120	2	0.0166667	0.153846	GO:0033079	GO:BP	immature T cell proliferation	21118	9262
1274	C5	TRUE	0.0128337	47	120	3	0.025	0.0638298	GO:0009268	GO:BP	response to pH	21118	3878
1275	C5	TRUE	0.0128337	47	120	3	0.025	0.0638298	GO:0050819	GO:BP	negative regulation of coagulation	21118	15390
1280	C5	TRUE	0.0130844	1912	120	21	0.175	0.0109833	GO:0045935	GO:BP	positive regulation of nucleobase-containing compound metabolic process	21118	13687
1290	C5	TRUE	0.0134644	48	120	3	0.025	0.0625	GO:0045124	GO:BP	regulation of bone resorption	21118	13179
1291	C5	TRUE	0.0134644	48	120	3	0.025	0.0625	GO:0043370	GO:BP	regulation of CD4-positive, alpha-beta T cell differentiation	21118	12309
1292	C5	TRUE	0.0134644	48	120	3	0.025	0.0625	GO:0002673	GO:BP	regulation of acute inflammatory response	21118	1323
1293	C5	TRUE	0.0134741	716	120	11	0.0916667	0.0153631	GO:0007610	GO:BP	behavior	21118	3483
1301	C5	TRUE	0.0138469	101	120	4	0.0333333	0.039604	GO:0046849	GO:BP	bone remodeling	21118	14446
1313	C5	TRUE	0.0142056	49	120	3	0.025	0.0612245	GO:0001961	GO:BP	positive regulation of cytokine-mediated signaling pathway	21118	695
1317	C5	TRUE	0.014291	102	120	4	0.0333333	0.0392157	GO:0035710	GO:BP	CD4-positive, alpha-beta T cell activation	21118	10606
1318	C5	TRUE	0.014312	14	120	2	0.0166667	0.142857	GO:0002730	GO:BP	regulation of dendritic cell cytokine production	21118	1380
1319	C5	TRUE	0.014312	14	120	2	0.0166667	0.142857	GO:0043922	GO:BP	negative regulation by host of viral transcription	21118	12545
1320	C5	TRUE	0.014312	14	120	2	0.0166667	0.142857	GO:0034116	GO:BP	positive regulation of heterotypic cell-cell adhesion	21118	9712
1321	C5	TRUE	0.014312	14	120	2	0.0166667	0.142857	GO:0002371	GO:BP	dendritic cell cytokine production	21118	1035
1322	C5	TRUE	0.014312	14	120	2	0.0166667	0.142857	GO:0032308	GO:BP	positive regulation of prostaglandin secretion	21118	8696
1323	C5	TRUE	0.014312	14	120	2	0.0166667	0.142857	GO:0030730	GO:BP	sequestering of triglyceride	21118	7996
1324	C5	TRUE	0.014312	14	120	2	0.0166667	0.142857	GO:0070431	GO:BP	nucleotide-binding oligomerization domain containing 2 signaling pathway	21118	18910
1347	C5	TRUE	0.0146066	835	120	12	0.1	0.0143713	GO:0061024	GO:BP	membrane organization	21118	17818
1355	C5	TRUE	0.0147889	247	120	6	0.05	0.0242915	GO:0051091	GO:BP	positive regulation of DNA-binding transcription factor activity	21118	15614
1359	C5	TRUE	0.0150326	248	120	6	0.05	0.0241935	GO:0001894	GO:BP	tissue homeostasis	21118	641
1360	C5	TRUE	0.0150326	333	120	7	0.0583333	0.021021	GO:0009615	GO:BP	response to virus	21118	3999
1365	C5	TRUE	0.0153069	249	120	6	0.05	0.0240964	GO:0034764	GO:BP	positive regulation of transmembrane transport	21118	10070
1369	C5	TRUE	0.01544	51	120	3	0.025	0.0588235	GO:0043900	GO:BP	regulation of multi-organism process	21118	12540
1376	C5	TRUE	0.0159181	629	120	10	0.0833333	0.0158983	GO:0044057	GO:BP	regulation of system process	21118	12641
1377	C5	TRUE	0.0160004	15	120	2	0.0166667	0.133333	GO:2001185	GO:BP	regulation of CD8-positive, alpha-beta T cell activation	21118	30331
1378	C5	TRUE	0.0160004	15	120	2	0.0166667	0.133333	GO:0048102	GO:BP	autophagic cell death	21118	14599
1379	C5	TRUE	0.0160004	15	120	2	0.0166667	0.133333	GO:0042159	GO:BP	lipoprotein catabolic process	21118	11605
1380	C5	TRUE	0.0160004	15	120	2	0.0166667	0.133333	GO:0071380	GO:BP	cellular response to prostaglandin E stimulus	21118	19465
1381	C5	TRUE	0.0160004	15	120	2	0.0166667	0.133333	GO:0031650	GO:BP	regulation of heat generation	21118	8441
1382	C5	TRUE	0.0160004	15	120	2	0.0166667	0.133333	GO:0070423	GO:BP	nucleotide-binding oligomerization domain containing signaling pathway	21118	18902
1404	C5	TRUE	0.0167591	108	120	4	0.0333333	0.037037	GO:0019218	GO:BP	regulation of steroid metabolic process	21118	6492
1405	C5	TRUE	0.0170348	11429	120	80	0.666667	0.00699974	GO:0008152	GO:BP	metabolic process	21118	3544
1407	C5	TRUE	0.0171438	745	120	11	0.0916667	0.0147651	GO:0031329	GO:BP	regulation of cellular catabolic process	21118	8287
1410	C5	TRUE	0.0173333	437	120	8	0.0666667	0.0183066	GO:0043087	GO:BP	regulation of GTPase activity	21118	12171
1411	C5	TRUE	0.0173759	146	82	6	0.0731707	0.0410959	KEGG:05418	KEGG	Fluid shear stress and atherosclerosis	8790	471
1413	C5	TRUE	0.0174808	101	82	5	0.0609756	0.049505	KEGG:04933	KEGG	AGE-RAGE signaling pathway in diabetic complications	8790	369
1414	C5	TRUE	0.0175554	54	120	3	0.025	0.0555556	GO:0032715	GO:BP	negative regulation of interleukin-6 production	21118	8988
1415	C5	TRUE	0.0175554	179	120	5	0.0416667	0.027933	GO:0006575	GO:BP	cellular modified amino acid metabolic process	21118	2561
1418	C5	TRUE	0.0176514	16	120	2	0.0166667	0.125	GO:0001845	GO:BP	phagolysosome assembly	21118	623
1419	C5	TRUE	0.0176514	16	120	2	0.0166667	0.125	GO:0032306	GO:BP	regulation of prostaglandin secretion	21118	8694
1420	C5	TRUE	0.0176514	16	120	2	0.0166667	0.125	GO:0043374	GO:BP	CD8-positive, alpha-beta T cell differentiation	21118	12313
1421	C5	TRUE	0.0176514	1844	120	20	0.166667	0.010846	GO:0010557	GO:BP	positive regulation of macromolecule biosynthetic process	21118	4721
1422	C5	TRUE	0.0176514	16	120	2	0.0166667	0.125	GO:0035872	GO:BP	nucleotide-binding domain, leucine rich repeat containing receptor signaling pathway	21118	10729
1423	C5	TRUE	0.0176514	16	120	2	0.0166667	0.125	GO:0002863	GO:BP	positive regulation of inflammatory response to antigenic stimulus	21118	1506
1431	C5	TRUE	0.0179496	111	120	4	0.0333333	0.036036	GO:0032231	GO:BP	regulation of actin filament bundle assembly	21118	8632
1435	C5	TRUE	0.018171	55	120	3	0.025	0.0545455	GO:0042531	GO:BP	positive regulation of tyrosine phosphorylation of STAT protein	21118	11843
1438	C5	TRUE	0.0183944	112	120	4	0.0333333	0.0357143	GO:0045833	GO:BP	negative regulation of lipid metabolic process	21118	13593
1440	C5	TRUE	0.0184372	182	120	5	0.0416667	0.0274725	GO:0032872	GO:BP	regulation of stress-activated MAPK cascade	21118	9102
1441	C5	TRUE	0.0184372	182	120	5	0.0416667	0.0274725	GO:2001257	GO:BP	regulation of cation channel activity	21118	30399
1448	C5	TRUE	0.018847	183	120	5	0.0416667	0.0273224	GO:0031644	GO:BP	regulation of nervous system process	21118	8435
1449	C5	TRUE	0.0189067	56	120	3	0.025	0.0535714	GO:0031529	GO:BP	ruffle organization	21118	8371
1450	C5	TRUE	0.0189067	56	120	3	0.025	0.0535714	GO:0051785	GO:BP	positive regulation of nuclear division	21118	16138
1451	C5	TRUE	0.0189067	56	120	3	0.025	0.0535714	GO:0051930	GO:BP	regulation of sensory perception of pain	21118	16238
1452	C5	TRUE	0.018924	1472	120	17	0.141667	0.0115489	GO:0030182	GO:BP	neuron differentiation	21118	7753
1458	C5	TRUE	0.0193257	114	120	4	0.0333333	0.0350877	GO:0046632	GO:BP	alpha-beta T cell differentiation	21118	14292
1464	C5	TRUE	0.0194028	17	120	2	0.0166667	0.117647	GO:0034162	GO:BP	toll-like receptor 9 signaling pathway	21118	9758
1465	C5	TRUE	0.0194028	17	120	2	0.0166667	0.117647	GO:0010623	GO:BP	programmed cell death involved in cell development	21118	4782
1467	C5	TRUE	0.019583	57	120	3	0.025	0.0526316	GO:0051931	GO:BP	regulation of sensory perception	21118	16239
1468	C5	TRUE	0.019583	57	120	3	0.025	0.0526316	GO:0046850	GO:BP	regulation of bone remodeling	21118	14447
1502	C5	TRUE	0.0197451	186	120	5	0.0416667	0.0268817	GO:0051896	GO:BP	regulation of protein kinase B signaling	21118	16215
1506	C5	TRUE	0.020148	187	120	5	0.0416667	0.026738	GO:0046890	GO:BP	regulation of lipid biosynthetic process	21118	14473
1507	C5	TRUE	0.0203421	58	120	3	0.025	0.0517241	GO:0045778	GO:BP	positive regulation of ossification	21118	13546
1508	C5	TRUE	0.0203421	58	120	3	0.025	0.0517241	GO:0051353	GO:BP	positive regulation of oxidoreductase activity	21118	15839
1520	C5	TRUE	0.0210963	18	120	2	0.0166667	0.111111	GO:0032695	GO:BP	negative regulation of interleukin-12 production	21118	8968
1521	C5	TRUE	0.0210963	18	120	2	0.0166667	0.111111	GO:0071361	GO:BP	cellular response to ethanol	21118	19446
1522	C5	TRUE	0.0210963	59	120	3	0.025	0.0508475	GO:0043030	GO:BP	regulation of macrophage activation	21118	12133
1523	C5	TRUE	0.0210963	18	120	2	0.0166667	0.111111	GO:0002922	GO:BP	positive regulation of humoral immune response	21118	1565
1524	C5	TRUE	0.0210963	18	120	2	0.0166667	0.111111	GO:0055012	GO:BP	ventricular cardiac muscle cell differentiation	21118	16790
1534	C5	TRUE	0.0217729	266	82	8	0.097561	0.0300752	KEGG:05020	KEGG	Prion disease	8790	394
1535	C5	TRUE	0.0217729	108	82	5	0.0609756	0.0462963	KEGG:04928	KEGG	Parathyroid hormone synthesis, secretion and action	8790	364
1536	C5	TRUE	0.0219258	60	120	3	0.025	0.05	GO:2000514	GO:BP	regulation of CD4-positive, alpha-beta T cell activation	21118	29705
1537	C5	TRUE	0.0219258	192	120	5	0.0416667	0.0260417	GO:2000241	GO:BP	regulation of reproductive process	21118	29441
1538	C5	TRUE	0.0219258	60	120	3	0.025	0.05	GO:0048662	GO:BP	negative regulation of smooth muscle cell proliferation	21118	15008
1551	C5	TRUE	0.022771	121	120	4	0.0333333	0.0330579	GO:1904659	GO:BP	glucose transmembrane transport	21118	27583
1552	C5	TRUE	0.022771	194	120	5	0.0416667	0.0257732	GO:0031960	GO:BP	response to corticosteroid	21118	8498
1553	C5	TRUE	0.022771	121	120	4	0.0333333	0.0330579	GO:0001959	GO:BP	regulation of cytokine-mediated signaling pathway	21118	693
1587	C5	TRUE	0.0229402	368	120	7	0.0583333	0.0190217	GO:0043547	GO:BP	positive regulation of GTPase activity	21118	12435
1590	C5	TRUE	0.0230222	19	120	2	0.0166667	0.105263	GO:0032310	GO:BP	prostaglandin secretion	21118	8698
1591	C5	TRUE	0.0230222	19	120	2	0.0166667	0.105263	GO:0031664	GO:BP	regulation of lipopolysaccharide-mediated signaling pathway	21118	8454
1592	C5	TRUE	0.0230263	1	120	1	0.00833333	1	GO:0150129	GO:BP	positive regulation of interleukin-33 production	21118	23279
1593	C5	TRUE	0.0230263	1	120	1	0.00833333	1	GO:0000968	GO:BP	tRNA exon ligation	21118	344
1594	C5	TRUE	0.0230263	20	120	2	0.0166667	0.1	GO:1902004	GO:BP	positive regulation of amyloid-beta formation	21118	25233
1595	C5	TRUE	0.0230263	1	120	1	0.00833333	1	GO:0032644	GO:BP	regulation of fractalkine production	21118	8917
1596	C5	TRUE	0.0230263	1	120	1	0.00833333	1	GO:0000971	GO:BP	tRNA exon ligation utilizing 2',3' cyclic phosphate of 5'-exon as source of linkage phosphate	21118	347
1597	C5	TRUE	0.0230263	124	120	4	0.0333333	0.0322581	GO:0015749	GO:BP	monosaccharide transmembrane transport	21118	5438
1598	C5	TRUE	0.0230263	1	120	1	0.00833333	1	GO:1904458	GO:BP	regulation of substance P secretion	21118	27404
1599	C5	TRUE	0.0230263	1	120	1	0.00833333	1	GO:1904140	GO:BP	negative regulation of microglial cell migration	21118	27106
1600	C5	TRUE	0.0230263	1	120	1	0.00833333	1	GO:0070392	GO:BP	detection of lipoteichoic acid	21118	18885
1601	C5	TRUE	0.0230263	1	120	1	0.00833333	1	GO:0002273	GO:BP	plasmacytoid dendritic cell differentiation	21118	937
1602	C5	TRUE	0.0230263	1	120	1	0.00833333	1	GO:0012502	GO:BP	induction of programmed cell death	21118	5131
1603	C5	TRUE	0.0230263	1	120	1	0.00833333	1	GO:0036161	GO:BP	calcitonin secretion	21118	10941
1604	C5	TRUE	0.0230263	1	120	1	0.00833333	1	GO:0002373	GO:BP	plasmacytoid dendritic cell cytokine production	21118	1037
1605	C5	TRUE	0.0230263	1	120	1	0.00833333	1	GO:0032724	GO:BP	positive regulation of fractalkine production	21118	8997
1606	C5	TRUE	0.0230263	1	120	1	0.00833333	1	GO:1904305	GO:BP	negative regulation of gastro-intestinal system smooth muscle contraction	21118	27257
1607	C5	TRUE	0.0230263	1	120	1	0.00833333	1	GO:1904336	GO:BP	negative regulation of ductus arteriosus closure	21118	27287
1608	C5	TRUE	0.0230263	1	120	1	0.00833333	1	GO:0071831	GO:BP	intermediate-density lipoprotein particle clearance	21118	19807
1609	C5	TRUE	0.0230263	1	120	1	0.00833333	1	GO:1904348	GO:BP	negative regulation of small intestine smooth muscle contraction	21118	27299
1610	C5	TRUE	0.0230263	1	120	1	0.00833333	1	GO:1904362	GO:BP	regulation of calcitonin secretion	21118	27313
1611	C5	TRUE	0.0230263	1	120	1	0.00833333	1	GO:1904364	GO:BP	positive regulation of calcitonin secretion	21118	27315
1612	C5	TRUE	0.0230263	1	120	1	0.00833333	1	GO:1904365	GO:BP	regulation of chemokinesis	21118	27316
1613	C5	TRUE	0.0230263	1	120	1	0.00833333	1	GO:1901980	GO:BP	positive regulation of inward rectifier potassium channel activity	21118	25211
1614	C5	TRUE	0.0230263	1	120	1	0.00833333	1	GO:0032603	GO:BP	fractalkine production	21118	8876
1615	C5	TRUE	0.0230263	20	120	2	0.0166667	0.1	GO:0071379	GO:BP	cellular response to prostaglandin stimulus	21118	19464
1616	C5	TRUE	0.0230263	1	120	1	0.00833333	1	GO:1901627	GO:BP	negative regulation of postsynaptic membrane organization	21118	24876
1617	C5	TRUE	0.0230263	1	120	1	0.00833333	1	GO:1904367	GO:BP	positive regulation of chemokinesis	21118	27318
1618	C5	TRUE	0.0230263	1	120	1	0.00833333	1	GO:0000378	GO:BP	RNA exon ligation	21118	157
1619	C5	TRUE	0.0230263	1	120	1	0.00833333	1	GO:1904445	GO:BP	negative regulation of establishment of Sertoli cell barrier	21118	27393
1620	C5	TRUE	0.0230263	1	120	1	0.00833333	1	GO:0038118	GO:BP	C-C chemokine receptor CCR7 signaling pathway	21118	11229
1621	C5	TRUE	0.0230263	1	120	1	0.00833333	1	GO:0061048	GO:BP	negative regulation of branching involved in lung morphogenesis	21118	17841
1622	C5	TRUE	0.0230263	63	120	3	0.025	0.047619	GO:0046637	GO:BP	regulation of alpha-beta T cell differentiation	21118	14297
1623	C5	TRUE	0.0230263	1	120	1	0.00833333	1	GO:1902999	GO:BP	negative regulation of phospholipid efflux	21118	26087
1624	C5	TRUE	0.0230263	1	120	1	0.00833333	1	GO:1903000	GO:BP	regulation of lipid transport across blood-brain barrier	21118	26088
1625	C5	TRUE	0.0230263	1	120	1	0.00833333	1	GO:0002881	GO:BP	negative regulation of chronic inflammatory response to non-antigenic stimulus	21118	1524
1626	C5	TRUE	0.0230263	20	120	2	0.0166667	0.1	GO:0032305	GO:BP	positive regulation of icosanoid secretion	21118	8693
1627	C5	TRUE	0.0230263	1	120	1	0.00833333	1	GO:0003185	GO:BP	sinoatrial valve morphogenesis	21118	1765
1628	C5	TRUE	0.0230263	1	120	1	0.00833333	1	GO:1903001	GO:BP	negative regulation of lipid transport across blood-brain barrier	21118	26089
1629	C5	TRUE	0.0230263	1	120	1	0.00833333	1	GO:0150089	GO:BP	multiple spine synapse organization	21118	23255
1630	C5	TRUE	0.0230263	1	120	1	0.00833333	1	GO:1903002	GO:BP	positive regulation of lipid transport across blood-brain barrier	21118	26090
1631	C5	TRUE	0.0230263	1	120	1	0.00833333	1	GO:0150090	GO:BP	multiple spine synapse organization, single dendrite	21118	23256
1632	C5	TRUE	0.0230263	1	120	1	0.00833333	1	GO:1903080	GO:BP	regulation of C-C chemokine receptor CCR7 signaling pathway	21118	26166
1633	C5	TRUE	0.0230263	1	120	1	0.00833333	1	GO:0002737	GO:BP	negative regulation of plasmacytoid dendritic cell cytokine production	21118	1387
1634	C5	TRUE	0.0230263	1	120	1	0.00833333	1	GO:0002736	GO:BP	regulation of plasmacytoid dendritic cell cytokine production	21118	1386
1635	C5	TRUE	0.0230263	1	120	1	0.00833333	1	GO:0002731	GO:BP	negative regulation of dendritic cell cytokine production	21118	1381
1636	C5	TRUE	0.0230263	1	120	1	0.00833333	1	GO:0038123	GO:BP	toll-like receptor TLR1:TLR2 signaling pathway	21118	11232
1637	C5	TRUE	0.0230263	1	120	1	0.00833333	1	GO:0042465	GO:BP	kinesis	21118	11815
1638	C5	TRUE	0.0230263	1	120	1	0.00833333	1	GO:1903788	GO:BP	positive regulation of glutathione biosynthetic process	21118	26793
1639	C5	TRUE	0.0230263	1	120	1	0.00833333	1	GO:0060311	GO:BP	negative regulation of elastin catabolic process	21118	17136
1640	C5	TRUE	0.0230263	1	120	1	0.00833333	1	GO:0072682	GO:BP	eosinophil extravasation	21118	20450
1641	C5	TRUE	0.0230263	20	120	2	0.0166667	0.1	GO:0060009	GO:BP	Sertoli cell development	21118	16876
1642	C5	TRUE	0.0230263	1	120	1	0.00833333	1	GO:0042466	GO:BP	chemokinesis	21118	11816
1643	C5	TRUE	0.0230263	1	120	1	0.00833333	1	GO:0090366	GO:BP	positive regulation of mRNA modification	21118	21434
1644	C5	TRUE	0.0230263	1	120	1	0.00833333	1	GO:0090731	GO:BP	cellular response to very-low-density lipoprotein particle stimulus	21118	21645
1645	C5	TRUE	0.0230263	122	120	4	0.0333333	0.0327869	GO:0008645	GO:BP	hexose transmembrane transport	21118	3662
1646	C5	TRUE	0.0230263	1	120	1	0.00833333	1	GO:0150202	GO:BP	negative regulation of transport across blood-brain barrier	21118	23320
1647	C5	TRUE	0.0230263	1	120	1	0.00833333	1	GO:0150201	GO:BP	positive regulation of transport across blood-brain barrier	21118	23319
1648	C5	TRUE	0.0230263	1	120	1	0.00833333	1	GO:0150200	GO:BP	regulation of transport across blood-brain barrier	21118	23318
1649	C5	TRUE	0.0230263	1	120	1	0.00833333	1	GO:0003172	GO:BP	sinoatrial valve development	21118	1752
1650	C5	TRUE	0.0230263	1	120	1	0.00833333	1	GO:1903082	GO:BP	positive regulation of C-C chemokine receptor CCR7 signaling pathway	21118	26168
1651	C5	TRUE	0.0230263	1	120	1	0.00833333	1	GO:1904335	GO:BP	regulation of ductus arteriosus closure	21118	27286
1652	C5	TRUE	0.0230263	1	120	1	0.00833333	1	GO:2000419	GO:BP	regulation of eosinophil extravasation	21118	29616
1653	C5	TRUE	0.0230263	1	120	1	0.00833333	1	GO:1905855	GO:BP	positive regulation of heparan sulfate binding	21118	28683
1654	C5	TRUE	0.0230263	1	120	1	0.00833333	1	GO:1904460	GO:BP	positive regulation of substance P secretion	21118	27406
1655	C5	TRUE	0.0230263	1	120	1	0.00833333	1	GO:2000420	GO:BP	negative regulation of eosinophil extravasation	21118	29617
1656	C5	TRUE	0.0230263	1	120	1	0.00833333	1	GO:1905858	GO:BP	regulation of heparan sulfate proteoglycan binding	21118	28686
1657	C5	TRUE	0.0230263	1	120	1	0.00833333	1	GO:1905860	GO:BP	positive regulation of heparan sulfate proteoglycan binding	21118	28688
1658	C5	TRUE	0.0230263	1	120	1	0.00833333	1	GO:1905890	GO:BP	regulation of cellular response to very-low-density lipoprotein particle stimulus	21118	28716
1659	C5	TRUE	0.0230263	1	120	1	0.00833333	1	GO:2001139	GO:BP	negative regulation of phospholipid transport	21118	30292
1660	C5	TRUE	0.0230263	1	120	1	0.00833333	1	GO:1905853	GO:BP	regulation of heparan sulfate binding	21118	28681
1661	C5	TRUE	0.0230263	1	120	1	0.00833333	1	GO:1990772	GO:BP	substance P secretion	21118	29088
1662	C5	TRUE	0.0230263	1	120	1	0.00833333	1	GO:1905835	GO:BP	cellular response to pyrimidine ribonucleotide	21118	28663
1663	C5	TRUE	0.0230263	1	120	1	0.00833333	1	GO:1905291	GO:BP	positive regulation of CAMKK-AMPK signaling cascade	21118	28169
1664	C5	TRUE	0.0230263	1	120	1	0.00833333	1	GO:2000350	GO:BP	positive regulation of CD40 signaling pathway	21118	29550
1665	C5	TRUE	0.0230263	1	120	1	0.00833333	1	GO:1905834	GO:BP	response to pyrimidine ribonucleotide	21118	28662
1666	C5	TRUE	0.0230263	1	120	1	0.00833333	1	GO:1904471	GO:BP	negative regulation of endothelin production	21118	27414
1667	C5	TRUE	0.0230263	1	120	1	0.00833333	1	GO:1990793	GO:BP	substance P secretion, neurotransmission	21118	29102
1668	C5	TRUE	0.0230263	1	120	1	0.00833333	1	GO:1904496	GO:BP	positive regulation of substance P secretion, neurotransmission	21118	27435
1669	C5	TRUE	0.0230263	1	120	1	0.00833333	1	GO:1904494	GO:BP	regulation of substance P secretion, neurotransmission	21118	27433
1673	C5	TRUE	0.0233714	64	120	3	0.025	0.046875	GO:0060425	GO:BP	lung morphogenesis	21118	17242
1706	C5	TRUE	0.024116	127	120	4	0.0333333	0.0314961	GO:0032414	GO:BP	positive regulation of ion transmembrane transporter activity	21118	8771
1707	C5	TRUE	0.024116	127	120	4	0.0333333	0.0314961	GO:0034219	GO:BP	carbohydrate transmembrane transport	21118	9801
1711	C5	TRUE	0.0244756	1536	120	17	0.141667	0.0110677	GO:0120036	GO:BP	plasma membrane bounded cell projection organization	21118	22821
1751	C5	TRUE	0.0250112	21	120	2	0.0166667	0.0952381	GO:0140131	GO:BP	positive regulation of lymphocyte chemotaxis	21118	23030
1752	C5	TRUE	0.0250112	21	120	2	0.0166667	0.0952381	GO:1905209	GO:BP	positive regulation of cardiocyte differentiation	21118	28088
1753	C5	TRUE	0.0250112	21	120	2	0.0166667	0.0952381	GO:0051000	GO:BP	positive regulation of nitric-oxide synthase activity	21118	15557
1754	C5	TRUE	0.0250112	21	120	2	0.0166667	0.0952381	GO:0002577	GO:BP	regulation of antigen processing and presentation	21118	1230
1755	C5	TRUE	0.0250112	21	120	2	0.0166667	0.0952381	GO:0043117	GO:BP	positive regulation of vascular permeability	21118	12193
1756	C5	TRUE	0.0250112	21	120	2	0.0166667	0.0952381	GO:2000251	GO:BP	positive regulation of actin cytoskeleton reorganization	21118	29451
1778	C5	TRUE	0.0261023	67	120	3	0.025	0.0447761	GO:0046324	GO:BP	regulation of glucose import	21118	14067
1782	C5	TRUE	0.0263577	7962	120	59	0.491667	0.0074102	GO:0044260	GO:BP	cellular macromolecule metabolic process	21118	12740
1789	C5	TRUE	0.0265223	931	120	12	0.1	0.0128894	GO:0000122	GO:BP	negative regulation of transcription by RNA polymerase II	21118	64
1790	C5	TRUE	0.0265251	208	120	5	0.0416667	0.0240385	GO:0001649	GO:BP	osteoblast differentiation	21118	486
1791	C5	TRUE	0.0265251	208	120	5	0.0416667	0.0240385	GO:0045216	GO:BP	cell-cell junction organization	21118	13228
1792	C5	TRUE	0.0267667	22	120	2	0.0166667	0.0909091	GO:0031639	GO:BP	plasminogen activation	21118	8430
1793	C5	TRUE	0.0267667	132	120	4	0.0333333	0.030303	GO:0035821	GO:BP	modulation of process of other organism	21118	10694
1794	C5	TRUE	0.0267667	22	120	2	0.0166667	0.0909091	GO:2000345	GO:BP	regulation of hepatocyte proliferation	21118	29545
1816	C5	TRUE	0.0282242	494	120	8	0.0666667	0.0161943	GO:0050804	GO:BP	modulation of chemical synaptic transmission	21118	15379
1819	C5	TRUE	0.0284218	394	120	7	0.0583333	0.0177665	GO:0022411	GO:BP	cellular component disassembly	21118	7609
1820	C5	TRUE	0.0284967	495	120	8	0.0666667	0.0161616	GO:0099177	GO:BP	regulation of trans-synaptic signaling	21118	22360
1829	C5	TRUE	0.0286804	23	120	2	0.0166667	0.0869565	GO:2000725	GO:BP	regulation of cardiac muscle cell differentiation	21118	29906
1830	C5	TRUE	0.0286804	23	120	2	0.0166667	0.0869565	GO:0002719	GO:BP	negative regulation of cytokine production involved in immune response	21118	1369
1831	C5	TRUE	0.0286804	135	120	4	0.0333333	0.0296296	GO:0032411	GO:BP	positive regulation of transporter activity	21118	8768
1832	C5	TRUE	0.0286804	23	120	2	0.0166667	0.0869565	GO:0048245	GO:BP	eosinophil chemotaxis	21118	14681
1833	C5	TRUE	0.0286804	23	120	2	0.0166667	0.0869565	GO:0031645	GO:BP	negative regulation of nervous system process	21118	8436
1834	C5	TRUE	0.0286804	23	120	2	0.0166667	0.0869565	GO:0043902	GO:BP	positive regulation of multi-organism process	21118	12542
1835	C5	TRUE	0.0286804	23	120	2	0.0166667	0.0869565	GO:0015732	GO:BP	prostaglandin transport	21118	5421
1836	C5	TRUE	0.0286804	23	120	2	0.0166667	0.0869565	GO:2000810	GO:BP	regulation of bicellular tight junction assembly	21118	29990
1837	C5	TRUE	0.0286804	23	120	2	0.0166667	0.0869565	GO:0036003	GO:BP	positive regulation of transcription from RNA polymerase II promoter in response to stress	21118	10843
1861	C5	TRUE	0.0294012	1191	120	14	0.116667	0.0117548	GO:0003006	GO:BP	developmental process involved in reproduction	21118	1591
1862	C5	TRUE	0.0294721	71	120	3	0.025	0.0422535	GO:0042509	GO:BP	regulation of tyrosine phosphorylation of STAT protein	21118	11842
1871	C5	TRUE	0.0297424	1576	120	17	0.141667	0.0107868	GO:0030030	GO:BP	cell projection organization	21118	7699
1877	C5	TRUE	0.0303613	305	120	6	0.05	0.0196721	GO:0007611	GO:BP	learning or memory	21118	3484
1878	C5	TRUE	0.0303613	138	120	4	0.0333333	0.0289855	GO:0045667	GO:BP	regulation of osteoblast differentiation	21118	13441
1879	C5	TRUE	0.0303613	138	120	4	0.0333333	0.0289855	GO:0055007	GO:BP	cardiac muscle cell differentiation	21118	16785
1880	C5	TRUE	0.0304452	72	120	3	0.025	0.0416667	GO:0045669	GO:BP	positive regulation of osteoblast differentiation	21118	13443
1881	C5	TRUE	0.0305589	503	120	8	0.0666667	0.0159046	GO:0048608	GO:BP	reproductive structure development	21118	14955
1886	C5	TRUE	0.0307405	24	120	2	0.0166667	0.0833333	GO:0002544	GO:BP	chronic inflammatory response	21118	1197
1887	C5	TRUE	0.0307405	24	120	2	0.0166667	0.0833333	GO:0010818	GO:BP	T cell chemotaxis	21118	4965
1888	C5	TRUE	0.0307405	24	120	2	0.0166667	0.0833333	GO:0034695	GO:BP	response to prostaglandin E	21118	10046
1889	C5	TRUE	0.0307405	24	120	2	0.0166667	0.0833333	GO:0050995	GO:BP	negative regulation of lipid catabolic process	21118	15554
1896	C5	TRUE	0.0314018	73	120	3	0.025	0.0410959	GO:0007260	GO:BP	tyrosine phosphorylation of STAT protein	21118	3165
1901	C5	TRUE	0.0319597	220	120	5	0.0416667	0.0227273	GO:1903050	GO:BP	regulation of proteolysis involved in cellular protein catabolic process	21118	26136
1903	C5	TRUE	0.0320783	508	120	8	0.0666667	0.015748	GO:0061458	GO:BP	reproductive system development	21118	18236
1905	C5	TRUE	0.0323387	141	120	4	0.0333333	0.0283688	GO:0042157	GO:BP	lipoprotein metabolic process	21118	11603
1906	C5	TRUE	0.032435	74	120	3	0.025	0.0405405	GO:2000573	GO:BP	positive regulation of DNA biosynthetic process	21118	29764
1920	C5	TRUE	0.0328356	25	120	2	0.0166667	0.08	GO:0090382	GO:BP	phagosome maturation	21118	21449
1921	C5	TRUE	0.0328356	25	120	2	0.0166667	0.08	GO:0034114	GO:BP	regulation of heterotypic cell-cell adhesion	21118	9710
1922	C5	TRUE	0.0328356	25	120	2	0.0166667	0.08	GO:1901623	GO:BP	regulation of lymphocyte chemotaxis	21118	24872
1923	C5	TRUE	0.0328356	25	120	2	0.0166667	0.08	GO:0032303	GO:BP	regulation of icosanoid secretion	21118	8691
1924	C5	TRUE	0.0328356	25	120	2	0.0166667	0.08	GO:2000193	GO:BP	positive regulation of fatty acid transport	21118	29393
1925	C5	TRUE	0.0328356	25	120	2	0.0166667	0.08	GO:0098581	GO:BP	detection of external biotic stimulus	21118	22053
1951	C5	TRUE	0.0335764	143	120	4	0.0333333	0.027972	GO:2001056	GO:BP	positive regulation of cysteine-type endopeptidase activity	21118	30230
1964	C5	TRUE	0.0345154	76	120	3	0.025	0.0394737	GO:0010507	GO:BP	negative regulation of autophagy	21118	4686
1974	C5	TRUE	0.0351663	26	120	2	0.0166667	0.0769231	GO:1904706	GO:BP	negative regulation of vascular associated smooth muscle cell proliferation	21118	27627
1975	C5	TRUE	0.0351663	26	120	2	0.0166667	0.0769231	GO:0010893	GO:BP	positive regulation of steroid biosynthetic process	21118	5027
1977	C5	TRUE	0.0354502	740	120	10	0.0833333	0.0135135	GO:0099536	GO:BP	synaptic signaling	21118	22390
1978	C5	TRUE	0.0355265	227	120	5	0.0416667	0.0220264	GO:0007249	GO:BP	I-kappaB kinase/NF-kappaB signaling	21118	3155
1980	C5	TRUE	0.0356996	146	120	4	0.0333333	0.0273973	GO:1903364	GO:BP	positive regulation of cellular protein catabolic process	21118	26404
2056	C5	TRUE	0.0365025	10350	120	72	0.6	0.00695652	GO:0044237	GO:BP	cellular metabolic process	21118	12725
2110	C5	TRUE	0.0368827	419	120	7	0.0583333	0.0167064	GO:0014706	GO:BP	striated muscle tissue development	21118	5207
2113	C5	TRUE	0.037298	27	120	2	0.0166667	0.0740741	GO:0010829	GO:BP	negative regulation of glucose transmembrane transport	21118	4976
2114	C5	TRUE	0.037298	27	120	2	0.0166667	0.0740741	GO:0060008	GO:BP	Sertoli cell differentiation	21118	16875
2115	C5	TRUE	0.037298	27	120	2	0.0166667	0.0740741	GO:0002313	GO:BP	mature B cell differentiation involved in immune response	21118	977
2118	C5	TRUE	0.0375855	79	120	3	0.025	0.0379747	GO:0006919	GO:BP	activation of cysteine-type endopeptidase activity involved in apoptotic process	21118	2870
2119	C5	TRUE	0.0375855	79	120	3	0.025	0.0379747	GO:0048844	GO:BP	artery morphogenesis	21118	15179
2150	C5	TRUE	0.0378487	323	120	6	0.05	0.0185759	GO:0007548	GO:BP	sex differentiation	21118	3424
2155	C5	TRUE	0.0384063	2	120	1	0.00833333	0.5	GO:0060557	GO:BP	positive regulation of vitamin D biosynthetic process	21118	17370
2156	C5	TRUE	0.0384063	2	120	1	0.00833333	0.5	GO:1903997	GO:BP	positive regulation of non-membrane spanning protein tyrosine kinase activity	21118	26973
2157	C5	TRUE	0.0384063	2	120	1	0.00833333	0.5	GO:0002032	GO:BP	desensitization of G protein-coupled receptor signaling pathway by arrestin	21118	760
2158	C5	TRUE	0.0384063	2	120	1	0.00833333	0.5	GO:1905223	GO:BP	epicardium morphogenesis	21118	28102
2159	C5	TRUE	0.0384063	2	120	1	0.00833333	0.5	GO:0001788	GO:BP	antibody-dependent cellular cytotoxicity	21118	571
2160	C5	TRUE	0.0384063	28	120	2	0.0166667	0.0714286	GO:2000310	GO:BP	regulation of NMDA receptor activity	21118	29510
2161	C5	TRUE	0.0384063	2	120	1	0.00833333	0.5	GO:2000334	GO:BP	positive regulation of blood microparticle formation	21118	29534
2162	C5	TRUE	0.0384063	2	120	1	0.00833333	0.5	GO:1904999	GO:BP	positive regulation of leukocyte adhesion to arterial endothelial cell	21118	27898
2163	C5	TRUE	0.0384063	2	120	1	0.00833333	0.5	GO:0120190	GO:BP	negative regulation of bile acid secretion	21118	22911
2164	C5	TRUE	0.0384063	2	120	1	0.00833333	0.5	GO:2000332	GO:BP	regulation of blood microparticle formation	21118	29532
2165	C5	TRUE	0.0384063	2	120	1	0.00833333	0.5	GO:0072564	GO:BP	blood microparticle formation	21118	20390
2166	C5	TRUE	0.0384063	2	120	1	0.00833333	0.5	GO:0042496	GO:BP	detection of diacyl bacterial lipopeptide	21118	11840
2167	C5	TRUE	0.0384063	2	120	1	0.00833333	0.5	GO:0002582	GO:BP	positive regulation of antigen processing and presentation of peptide or polysaccharide antigen via MHC class II	21118	1235
2168	C5	TRUE	0.0384063	2	120	1	0.00833333	0.5	GO:0002588	GO:BP	positive regulation of antigen processing and presentation of peptide antigen via MHC class II	21118	1241
2169	C5	TRUE	0.0384063	2	120	1	0.00833333	0.5	GO:2000388	GO:BP	positive regulation of antral ovarian follicle growth	21118	29585
2170	C5	TRUE	0.0384063	2	120	1	0.00833333	0.5	GO:2001272	GO:BP	positive regulation of cysteine-type endopeptidase activity involved in execution phase of apoptosis	21118	30414
2171	C5	TRUE	0.0384063	2	120	1	0.00833333	0.5	GO:1903786	GO:BP	regulation of glutathione biosynthetic process	21118	26791
2172	C5	TRUE	0.0384063	2	120	1	0.00833333	0.5	GO:0009407	GO:BP	toxin catabolic process	21118	3925
2173	C5	TRUE	0.0384063	2	120	1	0.00833333	0.5	GO:0008049	GO:BP	male courtship behavior	21118	3521
2174	C5	TRUE	0.0384063	2	120	1	0.00833333	0.5	GO:0002941	GO:BP	synoviocyte proliferation	21118	1581
2175	C5	TRUE	0.0384063	2	120	1	0.00833333	0.5	GO:0043387	GO:BP	mycotoxin catabolic process	21118	12325
2176	C5	TRUE	0.0384063	2	120	1	0.00833333	0.5	GO:0032499	GO:BP	detection of peptidoglycan	21118	8830
2177	C5	TRUE	0.0384063	2	120	1	0.00833333	0.5	GO:1901076	GO:BP	positive regulation of engulfment of apoptotic cell	21118	24371
2178	C5	TRUE	0.0384063	2	120	1	0.00833333	0.5	GO:0042495	GO:BP	detection of triacyl bacterial lipopeptide	21118	11839
2179	C5	TRUE	0.0384063	2	120	1	0.00833333	0.5	GO:0002876	GO:BP	positive regulation of chronic inflammatory response to antigenic stimulus	21118	1519
2180	C5	TRUE	0.0384063	2	120	1	0.00833333	0.5	GO:0018008	GO:BP	N-terminal peptidyl-glycine N-myristoylation	21118	5944
2181	C5	TRUE	0.0384063	2	120	1	0.00833333	0.5	GO:0002880	GO:BP	regulation of chronic inflammatory response to non-antigenic stimulus	21118	1523
2182	C5	TRUE	0.0384063	2	120	1	0.00833333	0.5	GO:0034499	GO:BP	late endosome to Golgi transport	21118	9983
2183	C5	TRUE	0.0384063	2	120	1	0.00833333	0.5	GO:1901647	GO:BP	positive regulation of synoviocyte proliferation	21118	24894
2184	C5	TRUE	0.0384063	9669	120	68	0.566667	0.00703279	GO:0006807	GO:BP	nitrogen compound metabolic process	21118	2776
2185	C5	TRUE	0.0384063	28	120	2	0.0166667	0.0714286	GO:1901532	GO:BP	regulation of hematopoietic progenitor cell differentiation	21118	24793
2186	C5	TRUE	0.0384063	2	120	1	0.00833333	0.5	GO:0006601	GO:BP	creatine biosynthetic process	21118	2586
2187	C5	TRUE	0.0384063	2	120	1	0.00833333	0.5	GO:0046223	GO:BP	aflatoxin catabolic process	21118	13967
2188	C5	TRUE	0.0384063	2	120	1	0.00833333	0.5	GO:0019391	GO:BP	glucuronoside catabolic process	21118	6652
2189	C5	TRUE	0.0384063	2	120	1	0.00833333	0.5	GO:1901377	GO:BP	organic heteropentacyclic compound catabolic process	21118	24650
2190	C5	TRUE	0.0384063	2	120	1	0.00833333	0.5	GO:1901253	GO:BP	negative regulation of intracellular transport of viral material	21118	24534
2191	C5	TRUE	0.0384063	2	120	1	0.00833333	0.5	GO:1901645	GO:BP	regulation of synoviocyte proliferation	21118	24892
2192	C5	TRUE	0.0384063	2	120	1	0.00833333	0.5	GO:1902227	GO:BP	negative regulation of macrophage colony-stimulating factor signaling pathway	21118	25440
2193	C5	TRUE	0.0384063	2	120	1	0.00833333	0.5	GO:0045994	GO:BP	positive regulation of translational initiation by iron	21118	13744
2194	C5	TRUE	0.0384063	2	120	1	0.00833333	0.5	GO:1903974	GO:BP	positive regulation of cellular response to macrophage colony-stimulating factor stimulus	21118	26956
2195	C5	TRUE	0.0384063	2	120	1	0.00833333	0.5	GO:0007521	GO:BP	muscle cell fate determination	21118	3398
2196	C5	TRUE	0.0384063	2	120	1	0.00833333	0.5	GO:0006600	GO:BP	creatine metabolic process	21118	2585
2197	C5	TRUE	0.0384063	2	120	1	0.00833333	0.5	GO:2000387	GO:BP	regulation of antral ovarian follicle growth	21118	29584
2198	C5	TRUE	0.0384063	2	120	1	0.00833333	0.5	GO:1903971	GO:BP	positive regulation of response to macrophage colony-stimulating factor	21118	26953
2199	C5	TRUE	0.0384063	2	120	1	0.00833333	0.5	GO:0006447	GO:BP	regulation of translational initiation by iron	21118	2444
2200	C5	TRUE	0.0384063	2	120	1	0.00833333	0.5	GO:0002545	GO:BP	chronic inflammatory response to non-antigenic stimulus	21118	1198
2201	C5	TRUE	0.0387041	82	120	3	0.025	0.0365854	GO:0046323	GO:BP	glucose import	21118	14066
2219	C5	TRUE	0.0392672	154	120	4	0.0333333	0.025974	GO:0055067	GO:BP	monovalent inorganic cation homeostasis	21118	16822
2228	C5	TRUE	0.0395425	29	120	2	0.0166667	0.0689655	GO:0001516	GO:BP	prostaglandin biosynthetic process	21118	441
2229	C5	TRUE	0.0395425	29	120	2	0.0166667	0.0689655	GO:0036037	GO:BP	CD8-positive, alpha-beta T cell activation	21118	10860
2230	C5	TRUE	0.0395425	29	120	2	0.0166667	0.0689655	GO:0046457	GO:BP	prostanoid biosynthetic process	21118	14181
2231	C5	TRUE	0.0395425	29	120	2	0.0166667	0.0689655	GO:1901658	GO:BP	glycosyl compound catabolic process	21118	24905
2232	C5	TRUE	0.0396275	83	120	3	0.025	0.0361446	GO:0055021	GO:BP	regulation of cardiac muscle tissue growth	21118	16799
2234	C5	TRUE	0.039678	155	120	4	0.0333333	0.0258065	GO:0050714	GO:BP	positive regulation of protein secretion	21118	15323
2236	C5	TRUE	0.040168	240	120	5	0.0416667	0.0208333	GO:0016064	GO:BP	immunoglobulin mediated immune response	21118	5684
2240	C5	TRUE	0.0404061	156	120	4	0.0333333	0.025641	GO:1901136	GO:BP	carbohydrate derivative catabolic process	21118	24429
2265	C5	TRUE	0.0408806	335	120	6	0.05	0.0179104	GO:0016042	GO:BP	lipid catabolic process	21118	5664
2267	C5	TRUE	0.0411055	157	120	4	0.0333333	0.0254777	GO:0045471	GO:BP	response to ethanol	21118	13308
2272	C5	TRUE	0.0413726	30	120	2	0.0166667	0.0666667	GO:0050901	GO:BP	leukocyte tethering or rolling	21118	15460
2273	C5	TRUE	0.0413726	30	120	2	0.0166667	0.0666667	GO:0072574	GO:BP	hepatocyte proliferation	21118	20395
2274	C5	TRUE	0.0413726	30	120	2	0.0166667	0.0666667	GO:0070723	GO:BP	response to cholesterol	21118	19077
2275	C5	TRUE	0.0413726	30	120	2	0.0166667	0.0666667	GO:0072575	GO:BP	epithelial cell proliferation involved in liver morphogenesis	21118	20396
2276	C5	TRUE	0.0414648	85	120	3	0.025	0.0352941	GO:0071277	GO:BP	cellular response to calcium ion	21118	19364
2283	C5	TRUE	0.0422278	244	120	5	0.0416667	0.0204918	GO:0031330	GO:BP	negative regulation of cellular catabolic process	21118	8288
2288	C5	TRUE	0.0424493	159	120	4	0.0333333	0.0251572	GO:0008643	GO:BP	carbohydrate transport	21118	3661
2289	C5	TRUE	0.0424956	86	120	3	0.025	0.0348837	GO:0050709	GO:BP	negative regulation of protein secretion	21118	15322
2290	C5	TRUE	0.0424956	86	120	3	0.025	0.0348837	GO:0046330	GO:BP	positive regulation of JNK cascade	21118	14073
2291	C5	TRUE	0.0424956	86	120	3	0.025	0.0348837	GO:0042698	GO:BP	ovulation cycle	21118	11927
2292	C5	TRUE	0.0426237	1400	120	15	0.125	0.0107143	GO:0045892	GO:BP	negative regulation of transcription, DNA-templated	21118	13646
2333	C5	TRUE	0.0429819	1402	120	15	0.125	0.010699	GO:1903507	GO:BP	negative regulation of nucleic acid-templated transcription	21118	26536
2350	C5	TRUE	0.043132	31	120	2	0.0166667	0.0645161	GO:0034694	GO:BP	response to prostaglandin	21118	10045
2351	C5	TRUE	0.043132	31	120	2	0.0166667	0.0645161	GO:0036075	GO:BP	replacement ossification	21118	10886
2352	C5	TRUE	0.043132	1403	120	15	0.125	0.0106914	GO:1902679	GO:BP	negative regulation of RNA biosynthetic process	21118	25802
2353	C5	TRUE	0.043132	31	120	2	0.0166667	0.0645161	GO:0001958	GO:BP	endochondral ossification	21118	692
2354	C5	TRUE	0.043132	31	120	2	0.0166667	0.0645161	GO:0043372	GO:BP	positive regulation of CD4-positive, alpha-beta T cell differentiation	21118	12311
2361	C5	TRUE	0.0434219	161	120	4	0.0333333	0.0248447	GO:0062013	GO:BP	positive regulation of small molecule metabolic process	21118	18554
2362	C5	TRUE	0.0434219	161	120	4	0.0333333	0.0248447	GO:0006694	GO:BP	steroid biosynthetic process	21118	2675
2372	C5	TRUE	0.0442867	88	120	3	0.025	0.0340909	GO:0060420	GO:BP	regulation of heart growth	21118	17238
2381	C5	TRUE	0.0451512	32	120	2	0.0166667	0.0625	GO:1901099	GO:BP	negative regulation of signal transduction in absence of ligand	21118	24394
2382	C5	TRUE	0.0451512	250	120	5	0.0416667	0.02	GO:0048738	GO:BP	cardiac muscle tissue development	21118	15083
2383	C5	TRUE	0.0451512	32	120	2	0.0166667	0.0625	GO:0072576	GO:BP	liver morphogenesis	21118	20397
2384	C5	TRUE	0.0451512	32	120	2	0.0166667	0.0625	GO:2001240	GO:BP	negative regulation of extrinsic apoptotic signaling pathway in absence of ligand	21118	30382
2410	C5	TRUE	0.0464091	165	120	4	0.0333333	0.0242424	GO:0002455	GO:BP	humoral immune response mediated by circulating immunoglobulin	21118	1110
2459	C5	TRUE	0.0474528	33	120	2	0.0166667	0.0606061	GO:0050802	GO:BP	circadian sleep/wake cycle, sleep	21118	15377
2460	C5	TRUE	0.0474528	33	120	2	0.0166667	0.0606061	GO:0062149	GO:BP	detection of stimulus involved in sensory perception of pain	21118	18614
2461	C5	TRUE	0.0474769	91	120	3	0.025	0.032967	GO:0034103	GO:BP	regulation of tissue remodeling	21118	9699
2462	C5	TRUE	0.0474769	91	120	3	0.025	0.032967	GO:0030203	GO:BP	glycosaminoglycan metabolic process	21118	7766
2463	C5	TRUE	0.0474769	91	120	3	0.025	0.032967	GO:0120193	GO:BP	tight junction organization	21118	22914
2519	C5	TRUE	0.0478294	167	120	4	0.0333333	0.0239521	GO:0010469	GO:BP	regulation of signaling receptor activity	21118	4663
2526	C5	TRUE	0.0481657	352	120	6	0.05	0.0170455	GO:0048545	GO:BP	response to steroid hormone	21118	14910
2535	C5	TRUE	0.0492469	257	120	5	0.0416667	0.0194553	GO:0051607	GO:BP	defense response to virus	21118	16015
2536	C5	TRUE	0.0492469	257	120	5	0.0416667	0.0194553	GO:0140546	GO:BP	defense response to symbiont	21118	23186
2539	C5	TRUE	0.0495298	355	120	6	0.05	0.0169014	GO:0062012	GO:BP	regulation of small molecule metabolic process	21118	18553
2540	C5	TRUE	0.0495298	34	120	2	0.0166667	0.0588235	GO:0045652	GO:BP	regulation of megakaryocyte differentiation	21118	13426
2541	C5	TRUE	0.0495298	34	120	2	0.0166667	0.0588235	GO:0002446	GO:BP	neutrophil mediated immunity	21118	1101
2542	C5	TRUE	0.0495298	34	120	2	0.0166667	0.0588235	GO:0036314	GO:BP	response to sterol	21118	11043
2543	C5	TRUE	0.0495298	34	120	2	0.0166667	0.0588235	GO:0009595	GO:BP	detection of biotic stimulus	21118	3983
2545	C5	TRUE	0.0496283	3	120	1	0.00833333	0.333333	GO:0097214	GO:BP	positive regulation of lysosomal membrane permeability	21118	21769
2546	C5	TRUE	0.0496283	3	120	1	0.00833333	0.333333	GO:0070340	GO:BP	detection of bacterial lipopeptide	21118	18853
2547	C5	TRUE	0.0496283	3	120	1	0.00833333	0.333333	GO:0019389	GO:BP	glucuronoside metabolic process	21118	6650
2548	C5	TRUE	0.0496283	93	120	3	0.025	0.0322581	GO:0050795	GO:BP	regulation of behavior	21118	15372
2549	C5	TRUE	0.0496283	3	120	1	0.00833333	0.333333	GO:1902226	GO:BP	regulation of macrophage colony-stimulating factor signaling pathway	21118	25439
2550	C5	TRUE	0.0496283	171	120	4	0.0333333	0.0233918	GO:0007254	GO:BP	JNK cascade	21118	3160
2551	C5	TRUE	0.0496283	3	120	1	0.00833333	0.333333	GO:0070358	GO:BP	actin polymerization-dependent cell motility	21118	18866
2552	C5	TRUE	0.0496283	3	120	1	0.00833333	0.333333	GO:1903995	GO:BP	regulation of non-membrane spanning protein tyrosine kinase activity	21118	26971
2553	C5	TRUE	0.0496283	3	120	1	0.00833333	0.333333	GO:1901252	GO:BP	regulation of intracellular transport of viral material	21118	24533
2554	C5	TRUE	0.0496283	3	120	1	0.00833333	0.333333	GO:0002270	GO:BP	plasmacytoid dendritic cell activation	21118	934
2555	C5	TRUE	0.0496283	3	120	1	0.00833333	0.333333	GO:0110091	GO:BP	negative regulation of hippocampal neuron apoptotic process	21118	22747
2556	C5	TRUE	0.0496283	3	120	1	0.00833333	0.333333	GO:1903984	GO:BP	positive regulation of TRAIL-activated apoptotic signaling pathway	21118	26965
2557	C5	TRUE	0.0496283	3	120	1	0.00833333	0.333333	GO:0002585	GO:BP	positive regulation of antigen processing and presentation of peptide antigen	21118	1238
2558	C5	TRUE	0.0496283	3	120	1	0.00833333	0.333333	GO:2001013	GO:BP	epithelial cell proliferation involved in renal tubule morphogenesis	21118	30191
2559	C5	TRUE	0.0496283	3	120	1	0.00833333	0.333333	GO:0003138	GO:BP	primary heart field specification	21118	1718
2560	C5	TRUE	0.0496283	3	120	1	0.00833333	0.333333	GO:1903012	GO:BP	positive regulation of bone development	21118	26100
2561	C5	TRUE	0.0496283	3	120	1	0.00833333	0.333333	GO:0002874	GO:BP	regulation of chronic inflammatory response to antigenic stimulus	21118	1517
2562	C5	TRUE	0.0496283	3	120	1	0.00833333	0.333333	GO:0060310	GO:BP	regulation of elastin catabolic process	21118	17135
2563	C5	TRUE	0.0496283	3	120	1	0.00833333	0.333333	GO:0055005	GO:BP	ventricular cardiac myofibril assembly	21118	16783
2564	C5	TRUE	0.0496283	3	120	1	0.00833333	0.333333	GO:0090310	GO:BP	negative regulation of DNA methylation-dependent heterochromatin assembly	21118	21379
2565	C5	TRUE	0.0496283	35	120	2	0.0166667	0.0571429	GO:0002701	GO:BP	negative regulation of production of molecular mediator of immune response	21118	1351
2566	C5	TRUE	0.0496283	3	120	1	0.00833333	0.333333	GO:0090365	GO:BP	regulation of mRNA modification	21118	21433
2567	C5	TRUE	0.0496283	3	120	1	0.00833333	0.333333	GO:0070101	GO:BP	positive regulation of chemokine-mediated signaling pathway	21118	18693
2568	C5	TRUE	0.0496283	3	120	1	0.00833333	0.333333	GO:0051176	GO:BP	positive regulation of sulfur metabolic process	21118	15691
2569	C5	TRUE	0.0496283	35	120	2	0.0166667	0.0571429	GO:0002347	GO:BP	response to tumor cell	21118	1011
2570	C5	TRUE	0.0496283	3	120	1	0.00833333	0.333333	GO:1905071	GO:BP	tight junction disassembly	21118	27962
2571	C5	TRUE	0.0496283	3	120	1	0.00833333	0.333333	GO:1905075	GO:BP	positive regulation of tight junction disassembly	21118	27966
2572	C5	TRUE	0.0496283	172	120	4	0.0333333	0.0232558	GO:1904064	GO:BP	positive regulation of cation transmembrane transport	21118	27037
2573	C5	TRUE	0.0496283	3	120	1	0.00833333	0.333333	GO:1905073	GO:BP	regulation of tight junction disassembly	21118	27964
2574	C5	TRUE	0.0496283	3	120	1	0.00833333	0.333333	GO:1901376	GO:BP	organic heteropentacyclic compound metabolic process	21118	24649
2575	C5	TRUE	0.0496283	3	120	1	0.00833333	0.333333	GO:0043385	GO:BP	mycotoxin metabolic process	21118	12323
2576	C5	TRUE	0.0496283	3	120	1	0.00833333	0.333333	GO:0033624	GO:BP	negative regulation of integrin activation	21118	9594
2577	C5	TRUE	0.0496283	3	120	1	0.00833333	0.333333	GO:1904444	GO:BP	regulation of establishment of Sertoli cell barrier	21118	27392
2578	C5	TRUE	0.0496283	35	120	2	0.0166667	0.0571429	GO:1905207	GO:BP	regulation of cardiocyte differentiation	21118	28086
2579	C5	TRUE	0.0496283	3	120	1	0.00833333	0.333333	GO:0046222	GO:BP	aflatoxin metabolic process	21118	13966
2580	C5	TRUE	0.0496283	3	120	1	0.00833333	0.333333	GO:1901074	GO:BP	regulation of engulfment of apoptotic cell	21118	24369
2581	C5	TRUE	0.0496283	3	120	1	0.00833333	0.333333	GO:0034164	GO:BP	negative regulation of toll-like receptor 9 signaling pathway	21118	9760
2582	C5	TRUE	0.0496283	3	120	1	0.00833333	0.333333	GO:2000111	GO:BP	positive regulation of macrophage apoptotic process	21118	29313
2583	C5	TRUE	0.0496283	172	120	4	0.0333333	0.0232558	GO:0035051	GO:BP	cardiocyte differentiation	21118	10133
2584	C5	TRUE	0.0496283	35	120	2	0.0166667	0.0571429	GO:0032689	GO:BP	negative regulation of interferon-gamma production	21118	8962
2585	C5	TRUE	0.0496283	1570	120	16	0.133333	0.0101911	GO:1901566	GO:BP	organonitrogen compound biosynthetic process	21118	24826
2586	C5	TRUE	0.0496283	3	120	1	0.00833333	0.333333	GO:0042322	GO:BP	negative regulation of circadian sleep/wake cycle, REM sleep	21118	11702
2587	C5	TRUE	0.0496283	3	120	1	0.00833333	0.333333	GO:0042271	GO:BP	susceptibility to natural killer cell mediated cytotoxicity	21118	11680
292	C6	TRUE	3.46438e-05	387	96	13	0.135417	0.0335917	GO:1902903	GO:BP	regulation of supramolecular fiber organization	21118	25999
321	C6	TRUE	5.40435e-05	276	96	11	0.114583	0.0398551	GO:0110053	GO:BP	regulation of actin filament organization	21118	22717
391	C6	TRUE	0.000152283	533	96	13	0.135417	0.0243902	GO:0051493	GO:BP	regulation of cytoskeleton organization	21118	15932
392	C6	TRUE	0.000152283	438	96	12	0.125	0.0273973	GO:0007015	GO:BP	actin filament organization	21118	2949
408	C6	TRUE	0.000173912	734	96	15	0.15625	0.020436	GO:0097435	GO:BP	supramolecular fiber organization	21118	21897
507	C6	TRUE	0.000456013	209	96	8	0.0833333	0.0382775	GO:1902905	GO:BP	positive regulation of supramolecular fiber organization	21118	26001
526	C6	TRUE	0.000522316	219	64	10	0.15625	0.0456621	KEGG:04810	KEGG	Regulation of actin cytoskeleton	8790	345
561	C6	TRUE	0.000749134	385	96	10	0.104167	0.025974	GO:0019693	GO:BP	ribose phosphate metabolic process	21118	6935
572	C6	TRUE	0.000817331	235	96	8	0.0833333	0.0340426	GO:0032271	GO:BP	regulation of protein polymerization	21118	8670
622	C6	TRUE	0.00102335	175	96	7	0.0729167	0.04	GO:0030833	GO:BP	regulation of actin filament polymerization	21118	8031
623	C6	TRUE	0.00105084	406	96	10	0.104167	0.0246305	GO:0032535	GO:BP	regulation of cellular component size	21118	8854
644	C6	TRUE	0.00124209	2	96	2	0.0208333	1	GO:0046166	GO:BP	glyceraldehyde-3-phosphate biosynthetic process	21118	13910
674	C6	TRUE	0.00151345	190	96	7	0.0729167	0.0368421	GO:0030041	GO:BP	actin filament polymerization	21118	7708
675	C6	TRUE	0.00153087	191	96	7	0.0729167	0.0366492	GO:0008064	GO:BP	regulation of actin polymerization or depolymerization	21118	3531
676	C6	TRUE	0.00153332	192	96	7	0.0729167	0.0364583	GO:0030832	GO:BP	regulation of actin filament length	21118	8030
711	C6	TRUE	0.00188553	358	96	9	0.09375	0.0251397	GO:0009150	GO:BP	purine ribonucleotide metabolic process	21118	3762
712	C6	TRUE	0.00188553	448	96	10	0.104167	0.0223214	GO:0043254	GO:BP	regulation of protein-containing complex assembly	21118	12247
739	C6	TRUE	0.00215935	554	96	11	0.114583	0.0198556	GO:0090066	GO:BP	regulation of anatomical structure size	21118	21148
770	C6	TRUE	0.00266967	376	96	9	0.09375	0.0239362	GO:0009259	GO:BP	ribonucleotide metabolic process	21118	3869
781	C6	TRUE	0.00273489	46	96	4	0.0416667	0.0869565	GO:2000404	GO:BP	regulation of T cell migration	21118	29601
782	C6	TRUE	0.00275681	217	96	7	0.0729167	0.0322581	GO:0008154	GO:BP	actin polymerization or depolymerization	21118	3546
791	C6	TRUE	0.00284592	385	96	9	0.09375	0.0233766	GO:0006163	GO:BP	purine nucleotide metabolic process	21118	2192
818	C6	TRUE	0.00312984	304	96	8	0.0833333	0.0263158	GO:0051258	GO:BP	protein polymerization	21118	15759
834	C6	TRUE	0.00341401	228	96	7	0.0729167	0.0307018	GO:0051495	GO:BP	positive regulation of cytoskeleton organization	21118	15934
870	C6	TRUE	0.00383967	406	96	9	0.09375	0.0221675	GO:0072521	GO:BP	purine-containing compound metabolic process	21118	20371
907	C6	TRUE	0.00445369	4	96	2	0.0208333	0.5	GO:2000412	GO:BP	positive regulation of thymocyte migration	21118	29609
908	C6	TRUE	0.00445369	417	96	9	0.09375	0.0215827	GO:0031346	GO:BP	positive regulation of cell projection organization	21118	8303
915	C6	TRUE	0.00457524	975	96	14	0.145833	0.014359	GO:1901135	GO:BP	carbohydrate derivative metabolic process	21118	24428
924	C6	TRUE	0.0046138	57	96	4	0.0416667	0.0701754	GO:0048247	GO:BP	lymphocyte chemotaxis	21118	14683
952	C6	TRUE	0.00513815	536	96	10	0.104167	0.0186567	GO:0044089	GO:BP	positive regulation of cellular component biogenesis	21118	12671
973	C6	TRUE	0.00558335	654	96	11	0.114583	0.0168196	GO:0061061	GO:BP	muscle structure development	21118	17854
976	C6	TRUE	0.00561187	1985	96	21	0.21875	0.0105793	GO:1901575	GO:BP	organic substance catabolic process	21118	24834
977	C6	TRUE	0.00562633	63	96	4	0.0416667	0.0634921	GO:2000401	GO:BP	regulation of lymphocyte migration	21118	29598
978	C6	TRUE	0.00562633	891	96	13	0.135417	0.0145903	GO:0019637	GO:BP	organophosphate metabolic process	21118	6884
981	C6	TRUE	0.00568842	251	64	9	0.140625	0.0358566	KEGG:05132	KEGG	Salmonella infection	8790	407
982	C6	TRUE	0.00569189	5	96	2	0.0208333	0.4	GO:0046836	GO:BP	glycolipid transport	21118	14437
983	C6	TRUE	0.00569189	5	96	2	0.0208333	0.4	GO:2000410	GO:BP	regulation of thymocyte migration	21118	29607
1053	C6	TRUE	0.00714527	28	96	3	0.03125	0.107143	GO:0006929	GO:BP	substrate-dependent cell migration	21118	2880
1054	C6	TRUE	0.00714527	466	96	9	0.09375	0.0193133	GO:0009117	GO:BP	nucleotide metabolic process	21118	3731
1055	C6	TRUE	0.00714527	28	96	3	0.03125	0.107143	GO:0051016	GO:BP	barbed-end actin filament capping	21118	15565
1060	C6	TRUE	0.00729177	167	64	7	0.109375	0.0419162	KEGG:04530	KEGG	Tight junction	8790	297
1075	C6	TRUE	0.00778386	71	96	4	0.0416667	0.056338	GO:0030837	GO:BP	negative regulation of actin filament polymerization	21118	8035
1081	C6	TRUE	0.00793339	476	96	9	0.09375	0.0189076	GO:0006753	GO:BP	nucleoside phosphate metabolic process	21118	2729
1082	C6	TRUE	0.00793339	130	96	5	0.0520833	0.0384615	GO:0009132	GO:BP	nucleoside diphosphate metabolic process	21118	3744
1135	C6	TRUE	0.00895234	1636	96	18	0.1875	0.0110024	GO:0043933	GO:BP	protein-containing complex subunit organization	21118	12553
1140	C6	TRUE	0.00899779	2399	96	23	0.239583	0.00958733	GO:0009056	GO:BP	catabolic process	21118	3672
1170	C6	TRUE	0.00985352	7	96	2	0.0208333	0.285714	GO:0072679	GO:BP	thymocyte migration	21118	20447
1171	C6	TRUE	0.00985352	7	96	2	0.0208333	0.285714	GO:1902396	GO:BP	protein localization to bicellular tight junction	21118	25591
1206	C6	TRUE	0.0109202	34	96	3	0.03125	0.0882353	GO:2000406	GO:BP	positive regulation of T cell migration	21118	29603
1248	C6	TRUE	0.0121106	996	96	13	0.135417	0.0130522	GO:0034622	GO:BP	cellular protein-containing complex assembly	21118	10013
1252	C6	TRUE	0.0122883	148	96	5	0.0520833	0.0337838	GO:0001837	GO:BP	epithelial to mesenchymal transition	21118	615
1253	C6	TRUE	0.0122883	226	96	6	0.0625	0.0265487	GO:0048762	GO:BP	mesenchymal cell differentiation	21118	15103
1299	C6	TRUE	0.0136938	87	96	4	0.0416667	0.045977	GO:0032272	GO:BP	negative regulation of protein polymerization	21118	8671
1364	C6	TRUE	0.0152319	537	96	9	0.09375	0.0167598	GO:0055086	GO:BP	nucleobase-containing small molecule metabolic process	21118	16839
1373	C6	TRUE	0.0158661	40	96	3	0.03125	0.075	GO:0009167	GO:BP	purine ribonucleoside monophosphate metabolic process	21118	3778
1401	C6	TRUE	0.0166564	41	96	3	0.03125	0.0731707	GO:1900026	GO:BP	positive regulation of substrate adhesion-dependent cell spreading	21118	23348
1402	C6	TRUE	0.0166564	336	96	7	0.0729167	0.0208333	GO:0051235	GO:BP	maintenance of location	21118	15739
1403	C6	TRUE	0.0166564	93	96	4	0.0416667	0.0430108	GO:0010770	GO:BP	positive regulation of cell morphogenesis involved in differentiation	21118	4920
1436	C6	TRUE	0.0183714	43	96	3	0.03125	0.0697674	GO:0051693	GO:BP	actin filament capping	21118	16092
1437	C6	TRUE	0.0183714	43	96	3	0.03125	0.0697674	GO:0009126	GO:BP	purine nucleoside monophosphate metabolic process	21118	3738
1505	C6	TRUE	0.0200755	11	96	2	0.0208333	0.181818	GO:0001765	GO:BP	membrane raft assembly	21118	552
1550	C6	TRUE	0.0226996	12	96	2	0.0208333	0.166667	GO:0072376	GO:BP	protein activation cascade	21118	20286
1674	C6	TRUE	0.0233838	179	96	5	0.0520833	0.027933	GO:0007519	GO:BP	skeletal muscle tissue development	21118	3396
1675	C6	TRUE	0.0234434	106	96	4	0.0416667	0.0377358	GO:0034446	GO:BP	substrate adhesion-dependent cell spreading	21118	9955
1676	C6	TRUE	0.0234434	706	96	10	0.104167	0.0141643	GO:0120035	GO:BP	regulation of plasma membrane bounded cell projection organization	21118	22820
1677	C6	TRUE	0.0234434	106	96	4	0.0416667	0.0377358	GO:0009135	GO:BP	purine nucleoside diphosphate metabolic process	21118	3747
1678	C6	TRUE	0.0234434	106	96	4	0.0416667	0.0377358	GO:0009179	GO:BP	purine ribonucleoside diphosphate metabolic process	21118	3790
1703	C6	TRUE	0.0239197	49	96	3	0.03125	0.0612245	GO:0030835	GO:BP	negative regulation of actin filament depolymerization	21118	8033
1705	C6	TRUE	0.0239794	112	64	5	0.078125	0.0446429	KEGG:04625	KEGG	C-type lectin receptor signaling pathway	8790	310
1714	C6	TRUE	0.0247221	108	96	4	0.0416667	0.037037	GO:0006165	GO:BP	nucleoside diphosphate phosphorylation	21118	2194
1757	C6	TRUE	0.0250508	13	96	2	0.0208333	0.153846	GO:0071712	GO:BP	ER-associated misfolded protein catabolic process	21118	19747
1758	C6	TRUE	0.0250508	13	96	2	0.0208333	0.153846	GO:0051764	GO:BP	actin crosslink formation	21118	16126
1759	C6	TRUE	0.0250508	109	96	4	0.0416667	0.0366972	GO:0009185	GO:BP	ribonucleoside diphosphate metabolic process	21118	3796
1774	C6	TRUE	0.0257744	110	96	4	0.0416667	0.0363636	GO:0010769	GO:BP	regulation of cell morphogenesis involved in differentiation	21118	4919
1775	C6	TRUE	0.0259057	51	96	3	0.03125	0.0588235	GO:0001974	GO:BP	blood vessel remodeling	21118	704
1781	C6	TRUE	0.0262442	111	96	4	0.0416667	0.036036	GO:0046939	GO:BP	nucleotide phosphorylation	21118	14500
1783	C6	TRUE	0.0263739	724	96	10	0.104167	0.0138122	GO:0031344	GO:BP	regulation of cell projection organization	21118	8301
1784	C6	TRUE	0.0264607	190	96	5	0.0520833	0.0263158	GO:0060538	GO:BP	skeletal muscle organ development	21118	17354
1785	C6	TRUE	0.0264607	280	96	6	0.0625	0.0214286	GO:0060485	GO:BP	mesenchyme development	21118	17301
1786	C6	TRUE	0.0264607	14	96	2	0.0208333	0.142857	GO:0046479	GO:BP	glycosphingolipid catabolic process	21118	14202
1811	C6	TRUE	0.0275358	121	64	5	0.078125	0.0413223	KEGG:01200	KEGG	Carbon metabolism	8790	184
1814	C6	TRUE	0.0280814	194	96	5	0.0520833	0.0257732	GO:0051099	GO:BP	positive regulation of binding	21118	15622
1828	C6	TRUE	0.0285785	75	64	4	0.0625	0.0533333	KEGG:05100	KEGG	Bacterial invasion of epithelial cells	8790	401
1840	C6	TRUE	0.0289903	500	96	8	0.0833333	0.016	GO:0090407	GO:BP	organophosphate biosynthetic process	21118	21468
1863	C6	TRUE	0.0294771	15	96	2	0.0208333	0.133333	GO:0046037	GO:BP	GMP metabolic process	21118	13781
1864	C6	TRUE	0.0294771	15	96	2	0.0208333	0.133333	GO:0019377	GO:BP	glycolipid catabolic process	21118	6639
1875	C6	TRUE	0.0301741	78	64	4	0.0625	0.0512821	KEGG:01230	KEGG	Biosynthesis of amino acids	8790	188
1883	C6	TRUE	0.0307026	57	96	3	0.03125	0.0526316	GO:1900024	GO:BP	regulation of substrate adhesion-dependent cell spreading	21118	23346
1884	C6	TRUE	0.0307026	57	96	3	0.03125	0.0526316	GO:0009161	GO:BP	ribonucleoside monophosphate metabolic process	21118	3772
1885	C6	TRUE	0.0307026	57	96	3	0.03125	0.0526316	GO:0030834	GO:BP	regulation of actin filament depolymerization	21118	8032
1898	C6	TRUE	0.031734	204	64	6	0.09375	0.0294118	KEGG:05205	KEGG	Proteoglycans in cancer	8790	435
1902	C6	TRUE	0.031996	16	96	2	0.0208333	0.125	GO:0035627	GO:BP	ceramide transport	21118	10543
1916	C6	TRUE	0.032601	123	96	4	0.0416667	0.0325203	GO:0007589	GO:BP	body fluid secretion	21118	3463
1917	C6	TRUE	0.0327188	762	96	10	0.104167	0.0131234	GO:0000904	GO:BP	cell morphogenesis involved in differentiation	21118	308
1971	C6	TRUE	0.0350961	17	96	2	0.0208333	0.117647	GO:0046184	GO:BP	aldehyde biosynthetic process	21118	13928
1972	C6	TRUE	0.0350961	17	96	2	0.0208333	0.117647	GO:0098760	GO:BP	response to interleukin-7	21118	22138
1973	C6	TRUE	0.0350961	17	96	2	0.0208333	0.117647	GO:0098761	GO:BP	cellular response to interleukin-7	21118	22139
1979	C6	TRUE	0.0356956	526	96	8	0.0833333	0.0152091	GO:0010975	GO:BP	regulation of neuron projection development	21118	5106
2054	C6	TRUE	0.0364908	62	96	3	0.03125	0.0483871	GO:0046622	GO:BP	positive regulation of organ growth	21118	14285
2055	C6	TRUE	0.0364908	62	96	3	0.03125	0.0483871	GO:0030042	GO:BP	actin filament depolymerization	21118	7709
2120	C6	TRUE	0.0376344	18	96	2	0.0208333	0.111111	GO:0061154	GO:BP	endothelial tube morphogenesis	21118	17944
2121	C6	TRUE	0.0376344	18	96	2	0.0208333	0.111111	GO:0002693	GO:BP	positive regulation of cellular extravasation	21118	1343
2122	C6	TRUE	0.0376344	18	96	2	0.0208333	0.111111	GO:0003159	GO:BP	morphogenesis of an endothelium	21118	1739
2210	C6	TRUE	0.0388747	1066	96	12	0.125	0.011257	GO:0031175	GO:BP	neuron projection development	21118	8239
2241	C6	TRUE	0.0405756	429	96	7	0.0729167	0.016317	GO:0006816	GO:BP	calcium ion transport	21118	2785
2284	C6	TRUE	0.0423967	68	96	3	0.03125	0.0441176	GO:0032233	GO:BP	positive regulation of actin filament bundle assembly	21118	8634
2298	C6	TRUE	0.0429137	1	96	1	0.0104167	1	GO:2000830	GO:BP	positive regulation of parathyroid hormone secretion	21118	30008
2299	C6	TRUE	0.0429137	21	96	2	0.0208333	0.0952381	GO:0031643	GO:BP	positive regulation of myelination	21118	8434
2300	C6	TRUE	0.0429137	327	96	6	0.0625	0.0183486	GO:0007517	GO:BP	muscle organ development	21118	3394
2301	C6	TRUE	0.0429137	1	96	1	0.0104167	1	GO:0045210	GO:BP	FasL biosynthetic process	21118	13224
2302	C6	TRUE	0.0429137	22	96	2	0.0208333	0.0909091	GO:0002082	GO:BP	regulation of oxidative phosphorylation	21118	796
2303	C6	TRUE	0.0429137	1	96	1	0.0104167	1	GO:2000415	GO:BP	positive regulation of fibronectin-dependent thymocyte migration	21118	29612
2304	C6	TRUE	0.0429137	1	96	1	0.0104167	1	GO:2000399	GO:BP	negative regulation of thymocyte aggregation	21118	29596
2305	C6	TRUE	0.0429137	442	96	7	0.0729167	0.0158371	GO:0060537	GO:BP	muscle tissue development	21118	17353
2306	C6	TRUE	0.0429137	446	96	7	0.0729167	0.0156951	GO:0006091	GO:BP	generation of precursor metabolites and energy	21118	2131
2307	C6	TRUE	0.0429137	1	96	1	0.0104167	1	GO:0021664	GO:BP	rhombomere 5 morphogenesis	21118	7227
2308	C6	TRUE	0.0429137	1	96	1	0.0104167	1	GO:0021659	GO:BP	rhombomere 3 structural organization	21118	7222
2309	C6	TRUE	0.0429137	1	96	1	0.0104167	1	GO:1901297	GO:BP	positive regulation of canonical Wnt signaling pathway involved in cardiac muscle cell fate commitment	21118	24577
2310	C6	TRUE	0.0429137	1	96	1	0.0104167	1	GO:0021665	GO:BP	rhombomere 5 structural organization	21118	7228
2311	C6	TRUE	0.0429137	1	96	1	0.0104167	1	GO:0021595	GO:BP	rhombomere structural organization	21118	7159
2312	C6	TRUE	0.0429137	1	96	1	0.0104167	1	GO:0021666	GO:BP	rhombomere 5 formation	21118	7229
2313	C6	TRUE	0.0429137	1	96	1	0.0104167	1	GO:0021837	GO:BP	motogenic signaling involved in postnatal olfactory bulb interneuron migration	21118	7397
2314	C6	TRUE	0.0429137	1	96	1	0.0104167	1	GO:0021594	GO:BP	rhombomere formation	21118	7158
2315	C6	TRUE	0.0429137	72	96	3	0.03125	0.0416667	GO:0097006	GO:BP	regulation of plasma lipoprotein particle levels	21118	21651
2316	C6	TRUE	0.0429137	1	96	1	0.0104167	1	GO:0072681	GO:BP	fibronectin-dependent thymocyte migration	21118	20449
2317	C6	TRUE	0.0429137	1	96	1	0.0104167	1	GO:1903007	GO:BP	positive regulation of Lys63-specific deubiquitinase activity	21118	26095
2318	C6	TRUE	0.0429137	1	96	1	0.0104167	1	GO:1903465	GO:BP	positive regulation of mitotic cell cycle DNA replication	21118	26496
2319	C6	TRUE	0.0429137	1	96	1	0.0104167	1	GO:0072680	GO:BP	extracellular matrix-dependent thymocyte migration	21118	20448
2320	C6	TRUE	0.0429137	1	96	1	0.0104167	1	GO:0072389	GO:BP	flavin adenine dinucleotide catabolic process	21118	20297
2321	C6	TRUE	0.0429137	1	96	1	0.0104167	1	GO:1904266	GO:BP	regulation of Schwann cell chemotaxis	21118	27220
2322	C6	TRUE	0.0429137	1	96	1	0.0104167	1	GO:1904268	GO:BP	positive regulation of Schwann cell chemotaxis	21118	27222
2323	C6	TRUE	0.0429137	1	96	1	0.0104167	1	GO:1905068	GO:BP	positive regulation of canonical Wnt signaling pathway involved in heart development	21118	27959
2324	C6	TRUE	0.0429137	1	96	1	0.0104167	1	GO:1990751	GO:BP	Schwann cell chemotaxis	21118	29077
2325	C6	TRUE	0.0429137	1	96	1	0.0104167	1	GO:2000398	GO:BP	regulation of thymocyte aggregation	21118	29595
2326	C6	TRUE	0.0429137	1713	96	16	0.166667	0.00934034	GO:0044281	GO:BP	small molecule metabolic process	21118	12753
2327	C6	TRUE	0.0429137	1	96	1	0.0104167	1	GO:2000413	GO:BP	regulation of fibronectin-dependent thymocyte migration	21118	29610
2328	C6	TRUE	0.0429137	1	96	1	0.0104167	1	GO:0021660	GO:BP	rhombomere 3 formation	21118	7223
2329	C6	TRUE	0.0429137	1	96	1	0.0104167	1	GO:0042728	GO:BP	flavin-containing compound catabolic process	21118	11949
2330	C6	TRUE	0.0429137	1	96	1	0.0104167	1	GO:0006147	GO:BP	guanine catabolic process	21118	2181
2331	C6	TRUE	0.0429137	1	96	1	0.0104167	1	GO:0035607	GO:BP	fibroblast growth factor receptor signaling pathway involved in orbitofrontal cortex development	21118	10530
2332	C6	TRUE	0.0429402	147	96	4	0.0416667	0.0272109	GO:0016052	GO:BP	carbohydrate catabolic process	21118	5672
2373	C6	TRUE	0.0444345	23	96	2	0.0208333	0.0869565	GO:0060445	GO:BP	branching involved in salivary gland morphogenesis	21118	17262
2374	C6	TRUE	0.0444345	23	96	2	0.0208333	0.0869565	GO:0071218	GO:BP	cellular response to misfolded protein	21118	19309
2375	C6	TRUE	0.0444345	23	96	2	0.0208333	0.0869565	GO:0150105	GO:BP	protein localization to cell-cell junction	21118	23267
2399	C6	TRUE	0.0463795	152	96	4	0.0416667	0.0263158	GO:0031333	GO:BP	negative regulation of protein-containing complex assembly	21118	8290
2455	C6	TRUE	0.0470424	77	96	3	0.03125	0.038961	GO:0009123	GO:BP	nucleoside monophosphate metabolic process	21118	3735
2457	C6	TRUE	0.0472751	24	96	2	0.0208333	0.0833333	GO:0006541	GO:BP	glutamine metabolic process	21118	2527
2544	C6	TRUE	0.0495339	79	96	3	0.03125	0.0379747	GO:1901880	GO:BP	negative regulation of protein depolymerization	21118	25115
2621	C6	TRUE	0.0499194	25	96	2	0.0208333	0.08	GO:0070841	GO:BP	inclusion body assembly	21118	19142
2622	C6	TRUE	0.0499194	25	96	2	0.0208333	0.08	GO:0051788	GO:BP	response to misfolded protein	21118	16139
2623	C6	TRUE	0.0499194	25	96	2	0.0208333	0.08	GO:0001759	GO:BP	organ induction	21118	548
42	C7	TRUE	2.3448e-10	340	104	18	0.173077	0.0529412	GO:0006909	GO:BP	phagocytosis	21118	2862
57	C7	TRUE	4.21267e-09	831	104	23	0.221154	0.0276775	GO:0046649	GO:BP	lymphocyte activation	21118	14309
74	C7	TRUE	3.02268e-08	108	104	10	0.0961538	0.0925926	GO:0050764	GO:BP	regulation of phagocytosis	21118	15347
82	C7	TRUE	5.64173e-08	720	104	20	0.192308	0.0277778	GO:0030155	GO:BP	regulation of cell adhesion	21118	7740
83	C7	TRUE	5.64173e-08	5796	104	59	0.567308	0.0101794	GO:0048522	GO:BP	positive regulation of cellular process	21118	14889
93	C7	TRUE	1.01599e-07	591	104	18	0.173077	0.0304569	GO:0097190	GO:BP	apoptotic signaling pathway	21118	21753
96	C7	TRUE	1.34183e-07	1871	104	31	0.298077	0.0165687	GO:0051049	GO:BP	regulation of transport	21118	15586
100	C7	TRUE	1.82627e-07	698	104	19	0.182692	0.0272206	GO:0050865	GO:BP	regulation of cell activation	21118	15430
101	C7	TRUE	1.83183e-07	340	104	14	0.134615	0.0411765	GO:0007159	GO:BP	leukocyte cell-cell adhesion	21118	3072
102	C7	TRUE	1.87395e-07	1254	104	25	0.240385	0.0199362	GO:0080134	GO:BP	regulation of response to stress	21118	20932
117	C7	TRUE	2.36715e-07	1589	104	28	0.269231	0.0176211	GO:1902531	GO:BP	regulation of intracellular signal transduction	21118	25684
119	C7	TRUE	2.65053e-07	418	104	15	0.144231	0.0358852	GO:0022407	GO:BP	regulation of cell-cell adhesion	21118	7605
121	C7	TRUE	2.88627e-07	2072	104	32	0.307692	0.015444	GO:0008283	GO:BP	cell population proliferation	21118	3580
122	C7	TRUE	2.88627e-07	73	104	8	0.0769231	0.109589	GO:0043407	GO:BP	negative regulation of MAP kinase activity	21118	12337
123	C7	TRUE	3.07533e-07	654	104	18	0.173077	0.0275229	GO:0002694	GO:BP	regulation of leukocyte activation	21118	1344
129	C7	TRUE	3.54485e-07	582	104	17	0.163462	0.0292096	GO:0060627	GO:BP	regulation of vesicle-mediated transport	21118	17436
130	C7	TRUE	3.54485e-07	3876	104	45	0.432692	0.0116099	GO:0065008	GO:BP	regulation of biological quality	21118	18664
134	C7	TRUE	3.83057e-07	309	104	13	0.125	0.0420712	GO:0046651	GO:BP	lymphocyte proliferation	21118	14310
135	C7	TRUE	4.19411e-07	312	104	13	0.125	0.0416667	GO:0032943	GO:BP	mononuclear cell proliferation	21118	9162
137	C7	TRUE	5.15995e-07	116	104	9	0.0865385	0.0775862	GO:0045446	GO:BP	endothelial cell differentiation	21118	13287
138	C7	TRUE	5.63567e-07	124	70	11	0.157143	0.0887097	KEGG:04380	KEGG	Osteoclast differentiation	8790	289
139	C7	TRUE	5.9472e-07	867	104	20	0.192308	0.0230681	GO:0060341	GO:BP	regulation of cellular localization	21118	17166
140	C7	TRUE	5.9472e-07	210	104	11	0.105769	0.052381	GO:0050866	GO:BP	negative regulation of cell activation	21118	15431
142	C7	TRUE	6.018e-07	1582	104	27	0.259615	0.017067	GO:0016192	GO:BP	vesicle-mediated transport	21118	5762
143	C7	TRUE	6.08799e-07	2428	104	34	0.326923	0.0140033	GO:0051128	GO:BP	regulation of cellular component organization	21118	15644
145	C7	TRUE	6.37906e-07	1372	104	25	0.240385	0.0182216	GO:0007155	GO:BP	cell adhesion	21118	3068
148	C7	TRUE	7.43913e-07	1384	104	25	0.240385	0.0180636	GO:0022610	GO:BP	biological adhesion	21118	7625
149	C7	TRUE	8.11433e-07	220	104	11	0.105769	0.05	GO:0002703	GO:BP	regulation of leukocyte mediated immunity	21118	1353
150	C7	TRUE	8.21177e-07	221	104	11	0.105769	0.0497738	GO:0050670	GO:BP	regulation of lymphocyte proliferation	21118	15301
151	C7	TRUE	8.21177e-07	339	104	13	0.125	0.0383481	GO:0070661	GO:BP	leukocyte proliferation	21118	19045
153	C7	TRUE	8.60454e-07	4502	104	48	0.461538	0.0106619	GO:0006810	GO:BP	transport	21118	2779
154	C7	TRUE	8.65631e-07	224	104	11	0.105769	0.0491071	GO:0032944	GO:BP	regulation of mononuclear cell proliferation	21118	9163
157	C7	TRUE	1.11225e-06	825	104	19	0.182692	0.0230303	GO:0098609	GO:BP	cell-cell adhesion	21118	22060
158	C7	TRUE	1.14402e-06	133	104	9	0.0865385	0.0676692	GO:0003158	GO:BP	endothelium development	21118	1738
161	C7	TRUE	1.29754e-06	502	104	15	0.144231	0.0298805	GO:0042110	GO:BP	T cell activation	21118	11574
167	C7	TRUE	1.57439e-06	589	104	16	0.153846	0.0271647	GO:0072657	GO:BP	protein localization to membrane	21118	20427
168	C7	TRUE	1.60911e-06	188	104	10	0.0961538	0.0531915	GO:0002695	GO:BP	negative regulation of leukocyte activation	21118	1345
169	C7	TRUE	1.62112e-06	243	104	11	0.105769	0.0452675	GO:0070663	GO:BP	regulation of leukocyte proliferation	21118	19047
170	C7	TRUE	1.62112e-06	676	104	17	0.163462	0.0251479	GO:0010942	GO:BP	positive regulation of cell death	21118	5076
178	C7	TRUE	1.92862e-06	102	104	8	0.0769231	0.0784314	GO:0007229	GO:BP	integrin-mediated signaling pathway	21118	3138
180	C7	TRUE	2.01812e-06	4658	104	48	0.461538	0.0103049	GO:0051234	GO:BP	establishment of localization	21118	15738
181	C7	TRUE	2.04036e-06	1166	104	22	0.211538	0.0188679	GO:0044092	GO:BP	negative regulation of molecular function	21118	12674
184	C7	TRUE	2.24573e-06	117	70	10	0.142857	0.0854701	KEGG:04670	KEGG	Leukocyte transendothelial migration	8790	323
191	C7	TRUE	2.87864e-06	152	104	9	0.0865385	0.0592105	GO:0051250	GO:BP	negative regulation of lymphocyte activation	21118	15751
193	C7	TRUE	2.88855e-06	708	104	17	0.163462	0.0240113	GO:0043408	GO:BP	regulation of MAPK cascade	21118	12338
196	C7	TRUE	3.1612e-06	73	104	7	0.0673077	0.0958904	GO:0001885	GO:BP	endothelial cell development	21118	634
197	C7	TRUE	3.25953e-06	547	104	15	0.144231	0.0274223	GO:0051249	GO:BP	regulation of lymphocyte activation	21118	15750
200	C7	TRUE	3.8028e-06	69	70	8	0.114286	0.115942	KEGG:05140	KEGG	Leishmaniasis	8790	411
202	C7	TRUE	3.90817e-06	76	104	7	0.0673077	0.0921053	GO:0050766	GO:BP	positive regulation of phagocytosis	21118	15349
204	C7	TRUE	4.14211e-06	77	104	7	0.0673077	0.0909091	GO:0043525	GO:BP	positive regulation of neuron apoptotic process	21118	12425
205	C7	TRUE	4.29408e-06	339	104	12	0.115385	0.0353982	GO:0002697	GO:BP	regulation of immune effector process	21118	1347
206	C7	TRUE	4.53497e-06	276	104	11	0.105769	0.0398551	GO:1903829	GO:BP	positive regulation of cellular protein localization	21118	26828
208	C7	TRUE	4.77308e-06	654	104	16	0.153846	0.0244648	GO:0051668	GO:BP	localization within membrane	21118	16072
222	C7	TRUE	6.74625e-06	288	104	11	0.105769	0.0381944	GO:0043405	GO:BP	regulation of MAP kinase activity	21118	12335
224	C7	TRUE	7.24488e-06	591	104	15	0.144231	0.0253807	GO:0043065	GO:BP	positive regulation of apoptotic process	21118	12162
225	C7	TRUE	7.24488e-06	291	104	11	0.105769	0.0378007	GO:0097193	GO:BP	intrinsic apoptotic signaling pathway	21118	21756
228	C7	TRUE	7.37477e-06	52	104	6	0.0576923	0.115385	GO:0061028	GO:BP	establishment of endothelial barrier	21118	17822
229	C7	TRUE	7.67468e-06	86	104	7	0.0673077	0.0813953	GO:0050672	GO:BP	negative regulation of lymphocyte proliferation	21118	15303
230	C7	TRUE	7.82918e-06	233	104	10	0.0961538	0.0429185	GO:0002699	GO:BP	positive regulation of immune effector process	21118	1349
231	C7	TRUE	8.01317e-06	87	104	7	0.0673077	0.0804598	GO:0032945	GO:BP	negative regulation of mononuclear cell proliferation	21118	9164
233	C7	TRUE	8.25597e-06	179	104	9	0.0865385	0.0502793	GO:0043409	GO:BP	negative regulation of MAPK cascade	21118	12339
234	C7	TRUE	8.90055e-06	131	104	8	0.0769231	0.0610687	GO:0071901	GO:BP	negative regulation of protein serine/threonine kinase activity	21118	19857
236	C7	TRUE	9.12636e-06	607	104	15	0.144231	0.0247117	GO:0043068	GO:BP	positive regulation of programmed cell death	21118	12165
238	C7	TRUE	9.88052e-06	304	104	11	0.105769	0.0361842	GO:1903037	GO:BP	regulation of leukocyte cell-cell adhesion	21118	26123
241	C7	TRUE	1.07818e-05	6168	104	55	0.528846	0.00891699	GO:0051179	GO:BP	localization	21118	15694
242	C7	TRUE	1.1076e-05	92	104	7	0.0673077	0.076087	GO:0070664	GO:BP	negative regulation of leukocyte proliferation	21118	19048
246	C7	TRUE	1.20755e-05	311	104	11	0.105769	0.0353698	GO:0050863	GO:BP	regulation of T cell activation	21118	15428
247	C7	TRUE	1.26018e-05	1922	104	27	0.259615	0.0140479	GO:0042592	GO:BP	homeostatic process	21118	11869
256	C7	TRUE	1.73118e-05	557	104	14	0.134615	0.0251346	GO:1903827	GO:BP	regulation of cellular protein localization	21118	26826
257	C7	TRUE	1.74887e-05	259	104	10	0.0961538	0.03861	GO:0043523	GO:BP	regulation of neuron apoptotic process	21118	12423
260	C7	TRUE	1.87035e-05	63	104	6	0.0576923	0.0952381	GO:0002886	GO:BP	regulation of myeloid leukocyte mediated immunity	21118	1529
270	C7	TRUE	2.10314e-05	35	104	5	0.0480769	0.142857	GO:0042119	GO:BP	neutrophil activation	21118	11579
274	C7	TRUE	2.23123e-05	752	104	16	0.153846	0.0212766	GO:0051129	GO:BP	negative regulation of cellular component organization	21118	15645
291	C7	TRUE	3.40115e-05	281	104	10	0.0961538	0.0355872	GO:0009743	GO:BP	response to carbohydrate	21118	4104
295	C7	TRUE	3.81894e-05	40	104	5	0.0480769	0.125	GO:0042554	GO:BP	superoxide anion generation	21118	11861
297	C7	TRUE	3.97515e-05	518	104	13	0.125	0.0250965	GO:1902532	GO:BP	negative regulation of intracellular signal transduction	21118	25685
298	C7	TRUE	4.05804e-05	289	104	10	0.0961538	0.0346021	GO:0072659	GO:BP	protein localization to plasma membrane	21118	20429
299	C7	TRUE	4.11098e-05	290	104	10	0.0961538	0.0344828	GO:0007162	GO:BP	negative regulation of cell adhesion	21118	3075
300	C7	TRUE	4.11098e-05	290	104	10	0.0961538	0.0344828	GO:0051402	GO:BP	neuron apoptotic process	21118	15869
301	C7	TRUE	4.11098e-05	225	104	9	0.0865385	0.04	GO:0072593	GO:BP	reactive oxygen species metabolic process	21118	20406
302	C7	TRUE	4.12542e-05	74	104	6	0.0576923	0.0810811	GO:0043299	GO:BP	leukocyte degranulation	21118	12268
303	C7	TRUE	4.20056e-05	1333	104	21	0.201923	0.0157539	GO:0071495	GO:BP	cellular response to endogenous stimulus	21118	19572
304	C7	TRUE	4.25056e-05	364	104	11	0.105769	0.0302198	GO:1901214	GO:BP	regulation of neuron death	21118	24504
306	C7	TRUE	4.35189e-05	802	104	16	0.153846	0.0199501	GO:0043086	GO:BP	negative regulation of catalytic activity	21118	12170
307	C7	TRUE	4.41976e-05	2482	104	30	0.288462	0.012087	GO:0032268	GO:BP	regulation of cellular protein metabolic process	21118	8667
308	C7	TRUE	4.41976e-05	42	104	5	0.0480769	0.119048	GO:0036230	GO:BP	granulocyte activation	21118	10980
311	C7	TRUE	4.59989e-05	119	104	7	0.0673077	0.0588235	GO:1901216	GO:BP	positive regulation of neuron death	21118	24506
312	C7	TRUE	4.59989e-05	710	104	15	0.144231	0.0211268	GO:1901699	GO:BP	cellular response to nitrogen compound	21118	24936
316	C7	TRUE	4.95951e-05	715	104	15	0.144231	0.020979	GO:0008285	GO:BP	negative regulation of cell population proliferation	21118	3582
322	C7	TRUE	5.47742e-05	2650	104	31	0.298077	0.0116981	GO:0051246	GO:BP	regulation of protein metabolic process	21118	15747
324	C7	TRUE	6.00199e-05	459	104	12	0.115385	0.0261438	GO:0042493	GO:BP	response to drug	21118	11837
325	C7	TRUE	6.10125e-05	460	104	12	0.115385	0.026087	GO:0071900	GO:BP	regulation of protein serine/threonine kinase activity	21118	19856
343	C7	TRUE	7.45977e-05	3275	104	35	0.336538	0.010687	GO:0031325	GO:BP	positive regulation of cellular metabolic process	21118	8283
346	C7	TRUE	7.53198e-05	557	104	13	0.125	0.0233393	GO:0060284	GO:BP	regulation of cell development	21118	17111
349	C7	TRUE	7.90943e-05	22	104	4	0.0384615	0.181818	GO:0032930	GO:BP	positive regulation of superoxide anion generation	21118	9155
351	C7	TRUE	8.34933e-05	655	104	14	0.134615	0.021374	GO:0030855	GO:BP	epithelial cell differentiation	21118	8051
352	C7	TRUE	8.41276e-05	250	104	9	0.0865385	0.036	GO:0002064	GO:BP	epithelial cell development	21118	782
354	C7	TRUE	8.7107e-05	1529	104	22	0.211538	0.0143885	GO:0051247	GO:BP	positive regulation of protein metabolic process	21118	15748
355	C7	TRUE	9.05823e-05	323	104	10	0.0961538	0.0309598	GO:0048872	GO:BP	homeostasis of number of cells	21118	15206
363	C7	TRUE	9.41363e-05	50	104	5	0.0480769	0.1	GO:0043300	GO:BP	regulation of leukocyte degranulation	21118	12269
369	C7	TRUE	0.000105806	407	104	11	0.105769	0.027027	GO:0042326	GO:BP	negative regulation of phosphorylation	21118	11705
370	C7	TRUE	0.000107371	24	104	4	0.0384615	0.166667	GO:1903306	GO:BP	negative regulation of regulated secretory pathway	21118	26350
371	C7	TRUE	0.000107371	977	104	17	0.163462	0.0174002	GO:0044087	GO:BP	regulation of cellular component biogenesis	21118	12669
382	C7	TRUE	0.000126723	1448	104	21	0.201923	0.0145028	GO:0032270	GO:BP	positive regulation of cellular protein metabolic process	21118	8669
383	C7	TRUE	0.000127345	3069	104	33	0.317308	0.0107527	GO:0051173	GO:BP	positive regulation of nitrogen compound metabolic process	21118	15688
384	C7	TRUE	0.000128086	501	104	12	0.115385	0.0239521	GO:0051051	GO:BP	negative regulation of transport	21118	15588
387	C7	TRUE	0.000144267	26	104	4	0.0384615	0.153846	GO:0032928	GO:BP	regulation of superoxide anion generation	21118	9153
389	C7	TRUE	0.000149599	96	104	6	0.0576923	0.0625	GO:0002275	GO:BP	myeloid cell activation involved in immune response	21118	939
398	C7	TRUE	0.00015847	207	104	8	0.0769231	0.0386473	GO:0042098	GO:BP	T cell proliferation	21118	11569
399	C7	TRUE	0.00015847	348	104	10	0.0961538	0.0287356	GO:0010720	GO:BP	positive regulation of cell development	21118	4873
403	C7	TRUE	0.00016665	908	104	16	0.153846	0.0176211	GO:0140352	GO:BP	export from cell	21118	23108
404	C7	TRUE	0.000167595	1128	104	18	0.173077	0.0159574	GO:0051248	GO:BP	negative regulation of protein metabolic process	21118	15749
409	C7	TRUE	0.000175029	353	104	10	0.0961538	0.0283286	GO:1990778	GO:BP	protein localization to cell periphery	21118	29092
415	C7	TRUE	0.000191691	101	104	6	0.0576923	0.0594059	GO:0002444	GO:BP	myeloid leukocyte mediated immunity	21118	1099
416	C7	TRUE	0.000194545	214	104	8	0.0769231	0.0373832	GO:0043281	GO:BP	regulation of cysteine-type endopeptidase activity involved in apoptotic process	21118	12261
417	C7	TRUE	0.000199226	528	104	12	0.115385	0.0227273	GO:0045936	GO:BP	negative regulation of phosphate metabolic process	21118	13688
418	C7	TRUE	0.000199226	528	104	12	0.115385	0.0227273	GO:0010563	GO:BP	negative regulation of phosphorus metabolic process	21118	4727
421	C7	TRUE	0.000204464	55	70	6	0.0857143	0.109091	KEGG:05144	KEGG	Malaria	8790	414
425	C7	TRUE	0.000212506	722	104	14	0.134615	0.0193906	GO:0043269	GO:BP	regulation of ion transport	21118	12252
435	C7	TRUE	0.000229341	366	104	10	0.0961538	0.0273224	GO:0001933	GO:BP	negative regulation of protein phosphorylation	21118	672
438	C7	TRUE	0.000237663	291	104	9	0.0865385	0.0309278	GO:0002366	GO:BP	leukocyte activation involved in immune response	21118	1030
443	C7	TRUE	0.00024119	106	104	6	0.0576923	0.0566038	GO:0001776	GO:BP	leukocyte homeostasis	21118	562
444	C7	TRUE	0.000248395	370	104	10	0.0961538	0.027027	GO:1901653	GO:BP	cellular response to peptide	21118	24900
448	C7	TRUE	0.000254261	294	104	9	0.0865385	0.0306122	GO:0002263	GO:BP	cell activation involved in immune response	21118	927
449	C7	TRUE	0.000263057	31	104	4	0.0384615	0.129032	GO:0032891	GO:BP	negative regulation of organic acid transport	21118	9121
454	C7	TRUE	0.000272796	643	104	13	0.125	0.0202177	GO:0071417	GO:BP	cellular response to organonitrogen compound	21118	19502
[truncated: 624 more rows]
