# Supplementary material for: Tongue immune compartment analysis reveals spatial macrophage heterogeneity
Source: eLife. 2022 Jun 24;11:e77490. doi: 10.7554/eLife.77490 (PMC9232218; doi:10.7554/eLife.77490)
Supplement: Figure 2—source data 1. — This table includes the full bulk RNA-seq read counts for all isolated tissue resident macrophage populations that are shown in Figure 2. [file elife-77490-fig2-data1.xlsx]

## Sheet: NormalizedCounts_KarinLisa_Manu
symbol	sLC_1	sLC_2	sLC_3	colon_1	colon_2	colon_3	RPM_1	RPM_2	RPM_3	lung_AM_1	lung_AM_2	lung_AM_3	tLC_f1	tLC_f2	tCX3CR1_MF_f1	tCX3CR1_MF_f3	tCX3CR1_MF_f4	tCX3CR1_MF_m2	tCX3CR1_MF_m4	microglia_1	microglia_2	microglia_3	microglia_4	microglia_5	microglia_6	microglia_7	tFOLR2_MF_f1	tFOLR2_MF_f2	tFOLR2_MF_m1	tFOLR2_MF_m2	tFOLR2_MF_m3	tFOLR2_MF_m4	hMHCIIp_1	hMHCIIp_2	hMHCIIp_3	hMHCIIn_1	hMHCIIn_2	hMHCIIn_3	entrez	ensembl	symbol	genename
Gnai3	51.29	150.93	91.96	140.2	116.92	63.94	112.83	116.22	114.45	285.29	262.12	196.64	28.59	209.89	22.49	123.26	104.59	69.68	45.69	69.9	83.05	122.77	112.93	91.83	99.42	102.43	69.65	31.66	77.32	113.67	84.05	79.69	133.38	143.76	121.45	131.11	137.88	250.06	14679	ENSMUSG00000000001	Gnai3	guanine nucleotide binding protein (G protein)/ alpha inhibiting 3
Cdc45	38.6	23.8	15.64	8.56	17.22	7.59	10.32	7.37	2.01	32.57	27.59	17.19	0	4.56	3.21	0	27.89	4.75	0	0	4.47	2.92	5.46	6.78	3.63	0.67	34.83	0	7.54	6	4.99	2.24	88.92	15.08	9.85	20.1	26.08	21.33	12544	ENSMUSG00000000028	Cdc45	cell division cycle 45
H19	4.96	5.64	9.48	9.22	24.47	0	2.21	1.73	5.02	2.15	2.25	1.51	7.8	0	0	0	18.59	0	0	0	0	18.27	36.43	12.52	14.51	2.01	34.83	0	30.18	9.47	10.82	0	0	2.51	0	6.12	14.91	39.57	14955	ENSMUSG00000000031	H19	H19/ imprinted maternally expressed transcript
Scml2	0	8.14	2.37	0.66	1.81	0	2.21	0	0	0.72	0	0.6	0	0	0	25.21	0	0	9.14	0	0.28	0	0	0	0	0	0	0	0	0.95	0	0	0	0.5	0	0	1.24	0	107815	ENSMUSG00000000037	Scml2	Scm polycomb group protein like 2
Apoh	0	0	0	0	0	9.75	0	0	0	0	0.96	0.3	0	0	0	0	0	0	0	0	0	0.73	16.39	0	0	0	0	0	0	0	0	0	0	0	0	0	0	0	11818	ENSMUSG00000000049	Apoh	apolipoprotein H
Narf	18.2	31.31	33.66	19.75	29.91	27.09	22.86	43.37	23.09	15.03	6.74	8.44	18.19	82.13	22.49	92.45	102.27	55.42	85.29	145.39	127.79	96.46	100.18	56.87	55.15	58.24	57.21	37.99	56.58	23.68	45.77	6.73	28.08	50.77	67.29	35.84	34.78	35.08	67608	ENSMUSG00000000056	Narf	nuclear prelamin A recognition factor
Cav2	34.19	63.25	40.77	46.08	28.1	13	10.32	6.07	2.01	169.67	144.7	92.59	163.72	269.21	44.98	44.82	76.7	50.67	73.1	2.8	3.91	13.88	9.11	16.7	9.43	20.08	124.38	0	19.8	74.83	54.09	49.38	39.78	78.92	41.03	81.29	77.01	129.38	12390	ENSMUSG00000000058	Cav2	caveolin 2
Klf6	501.3	236.72	297.21	1708.75	1825.43	1830.37	287.6	392.47	496.97	802.9	743.37	728.95	873.17	953.63	1603.28	1977.77	2289.36	2554.25	1398.09	394.23	420.83	344.93	253.17	265.59	402.05	232.3	2415.47	3850.15	3967.08	3255.05	2649.7	2628.52	5047.46	4349.42	2256.62	3022.55	3355.03	2416.37	23849	ENSMUSG00000000078	Klf6	Kruppel-like factor 6
Scmh1	68.94	93.94	71.58	102.68	116.92	91.03	72.27	101.48	45.18	57.99	31.44	48.56	67.57	0	93.18	39.22	46.48	64.93	115.75	162.16	183.71	190	178.5	157.58	150.95	154.65	12.44	6.33	78.27	54.62	49.93	39.28	44.46	74.39	100.11	59.44	119.25	88.4	29871	ENSMUSG00000000085	Scmh1	sex comb on midleg homolog 1
Cox5a	864.72	685.11	1173.67	983.39	957.12	1155.23	626.82	1180.86	893.55	681.2	752.68	855.91	1101.85	939.94	559.06	599.5	478.79	929.54	904.65	150.98	148.2	190	182.14	184.71	555.9	336.74	315.93	487.6	678.94	1241.84	506.81	675.65	875.17	379	365.16	504.34	398.73	715.37	12858	ENSMUSG00000000088	Cox5a	cytochrome c oxidase subunit 5A
Tbx2	0	8.14	0	12.51	2.72	9.75	5.9	2.17	4.02	12.17	2.57	7.54	0	0	0	2.8	0	0	0	0	2.52	3.65	12.75	1.57	0	0	0	44.33	0	0.32	0.83	0	0	4.52	2.46	0	0	0	21385	ENSMUSG00000000093	Tbx2	T-box 2
Tbx4	0	0	0	1.32	0	0	0	0	0	0	0	0	0	0	0	0	0	0	0	0	0	0	0	0	0	0	0	0	0	0	0	0	0	0	0	0	0	0	21387	ENSMUSG00000000094	Tbx4	T-box 4
Ngfr	2.21	0	0	0.66	2.72	0	0	0	0	0.36	0	0	2.6	0	0	22.41	2.32	6.33	85.29	0	0.84	0	0	0	0	0	0	0	0	0	0	0	4.68	0	0.82	0.87	0	2.53	18053	ENSMUSG00000000120	Ngfr	nerve growth factor receptor (TNFR superfamily/ member 16)
Wnt3	10.48	3.76	1.9	0	0	0	0	0	0	0	0	0	0	0	0	0	0	0	0	0	0	0	0	0	2.18	0	0	0	0	0	0	0	0	0	0	0	0	0	22415	ENSMUSG00000000125	Wnt3	wingless-type MMTV integration site family/ member 3
Wnt9a	367.29	298.72	433.73	0.66	2.72	4.33	0	0	0	0.36	0	0	38.98	0	0	2.8	0	0	0	0	0	0	0	0	5.08	0	0	0	0	0.32	4.99	0	0	2.01	0	0	6.21	0	216795	ENSMUSG00000000126	Wnt9a	wingless-type MMTV integration site family/ member 9A
Fer	7.72	1.25	0.95	25.67	37.16	11.92	36.87	44.23	40.16	35.08	26.31	19.6	0	0	3.21	0	20.92	3.17	0	55.92	40.55	25.58	36.43	29.74	36.29	28.12	0	19	58.46	40.73	30.79	31.43	121.68	55.79	60.72	65.56	81.98	53.32	14158	ENSMUSG00000000127	Fer	fer (fms/fps related) protein kinase
Xpo6	167.1	102.7	210.94	185.62	276.44	312.11	135.69	129.67	251	159.29	129.94	134.21	90.95	22.81	202.42	112.06	134.8	156.77	137.07	97.86	139.53	81.85	102	132.53	197.4	106.44	149.26	164.64	282.89	162.93	132.32	153.76	332.29	129.68	109.96	102.27	83.22	137.52	74204	ENSMUSG00000000131	Xpo6	exportin 6
Tfe3	274.09	306.86	321.86	375.85	309.07	403.14	402.64	394.63	400.59	239.47	279.13	313.96	119.54	41.07	292.38	159.68	443.93	296.12	414.25	749.31	1028.73	689.86	668.45	661.1	627.75	818.75	338.31	541.43	560.12	369.11	663.26	479.24	208.26	368.94	393.06	291.07	301.84	339.3	209446	ENSMUSG00000000134	Tfe3	transcription factor E3
Axin2	7.72	17.53	38.4	17.77	8.16	18.42	0	0.43	0	0	1.28	0	0	0	0	0	0	0	0	0	2.24	0	0	0	2.18	4.02	0	0	2.83	0	0.83	0	0	0	1.64	0.87	6.21	0	12006	ENSMUSG00000000142	Axin2	axin 2
Brat1	47.43	39.45	39.82	67.8	57.1	52.02	100.29	112.32	148.59	76.96	69.62	93.79	59.77	0	122.09	22.41	41.84	33.25	12.18	184.53	185.39	113.27	118.39	123.66	214.09	159.33	22.39	75.99	36.78	29.36	9.99	56.12	86.58	48.76	51.7	19.23	31.05	42.38	231841	ENSMUSG00000000148	Brat1	BRCA1-associated ATM activator 1
Gna12	83.83	54.48	101.44	252.76	653.49	519.09	449.1	837.4	486.93	105.24	105.55	94.1	106.55	4.56	951.04	448.22	371.88	551.07	490.4	374.66	319.89	342.74	455.34	335.51	687.26	682.18	233.84	275.46	358.33	391.21	284.61	191.92	407.17	203.07	263.41	291.07	221.1	331.16	14673	ENSMUSG00000000149	Gna12	guanine nucleotide binding protein/ alpha 12
Slc22a18	116.91	95.82	94.8	90.18	37.16	78.03	17.7	9.97	7.03	123.5	120.31	96.51	0	0	48.19	44.82	62.75	85.51	0	2.8	3.36	3.65	0	5.22	7.98	2.68	0	47.49	69.78	33.79	65.74	67.34	49.14	20.61	9.03	13.11	24.84	17.68	18400	ENSMUSG00000000154	Slc22a18	solute carrier family 22 (organic cation transporter)/ member 18
Itgb2l	12.13	4.38	1.9	0	0	0	0	0	0	0	0	0	0	0	0	0	0	0	0	0	0	0	0	0	0	0	0	0	0	0	0	0	0	0	0	0.87	0	0	16415	ENSMUSG00000000157	Itgb2l	integrin beta 2-like
Igsf5	0	3.76	0	35.54	9.06	16.26	0	0	0	0.36	0	0	0	0	0	0	0	0	0	0	0	0	0	0	0.73	0	0	0	0	0	0	0	0	0	0	0	0	0	72058	ENSMUSG00000000159	Igsf5	immunoglobulin superfamily/ member 5
Pih1d2	2.21	8.14	1.9	0	1.81	0	0	0.87	0	1.43	2.25	3.92	0	0	0	0	0	0	0	0	1.4	1.46	0	1.04	0	2.01	0	91.82	0	2.53	0	0	7.02	0	2.46	0	0	0.28	72614	ENSMUSG00000000167	Pih1d2	PIH1 domain containing 2
Dlat	102.02	113.98	121.35	121.11	86.1	95.37	84.07	93.67	63.25	115.26	112.61	133.6	103.95	31.94	57.83	61.63	99.94	79.18	103.56	103.45	72.42	76	78.32	48.53	137.16	125.19	0	0	67.89	70.1	51.6	63.97	53.82	73.39	83.7	73.42	118	97.38	235339	ENSMUSG00000000168	Dlat	dihydrolipoamide S-acetyltransferase (E2 component of pyruvate dehydrogenase complex)
Sdhd	549.28	363.85	602.48	500.25	464.97	739.09	273.59	407.64	482.92	405.57	427.35	436.7	283.26	301.15	228.12	215.71	332.36	300.87	411.2	109.04	223.98	210.47	229.49	227.5	469.54	299.25	256.22	338.79	169.73	522.88	362	434.35	671.59	321.7	260.95	385.47	413.63	393.47	66925	ENSMUSG00000000171	Sdhd	succinate dehydrogenase complex/ subunit D/ integral membrane protein
Ccnd2	137.32	30.06	35.08	417.97	198.49	295.85	1054.54	783.2	1303.18	2139.52	1656.79	2593.68	93.55	86.69	28.92	266.13	564.79	275.54	283.27	33.55	4.75	5.85	0	21.91	3.63	3.35	79.6	262.8	25.46	46.73	74.07	63.97	259.74	531.8	540.77	355.75	279.48	173.44	12444	ENSMUSG00000000184	Ccnd2	cyclin D2
Gpr107	116.36	176.6	155.48	304.76	211.18	283.93	222.71	219	173.69	143.18	205.01	192.72	200.1	396.97	205.63	100.85	197.56	171.02	191.89	377.45	332.47	420.93	466.27	399.69	357.05	321.34	226.37	50.66	219.71	185.98	192.24	282.83	156.78	299.58	267.51	273.58	277	181.86	277463	ENSMUSG00000000194	Gpr107	G protein-coupled receptor 107
Nalcn	0	0	0	0	0	0	0	0	0	0	0	0	0	0	0	0	0	0	0	0	0	0	5.46	0	0	0	0	0	0	0	0	0	0	0	0	0	0	0	338370	ENSMUSG00000000197	Nalcn	sodium leak channel/ non-selective
Btbd17	5.51	0	0	0	0	0	0	0	0	0	0	0	0	9.13	0	5.6	16.27	0	0	11.18	17.9	12.42	23.68	10.44	1.45	8.03	0	0	0	2.84	11.65	1.12	28.08	5.53	9.85	12.24	4.97	1.12	72014	ENSMUSG00000000202	Btbd17	BTB (POZ) domain containing 17
Slfn4	0	0.63	0	57.92	14.5	22.76	3.69	8.24	9.04	18.61	14.12	15.68	5.2	0	0	0	0	0	0	0	0	0	0	0	0	0	0	0	30.18	33.47	14.98	23.57	32.76	3.02	2.46	24.47	7.45	13.19	20558	ENSMUSG00000000204	Slfn4	schlafen 4
Scnn1g	2.21	4.38	2.84	0.66	0	0	0	0	0	1.07	0	0.3	0	0	0	0	0	0	0	0	0	0	0	0	0	0	0	0	0	0	0	0	0	0	0	0	0	0	20278	ENSMUSG00000000216	Scnn1g	sodium channel/ nonvoltage-gated 1 gamma
Drp2	0.55	3.13	0	0	0	0	0	0	0	0	1.28	0.3	0	0	0	0	0	0	0	0	0	0	0	0	0	0	0	0	2.83	1.58	0	0	0	0	0	0	0	0	13497	ENSMUSG00000000223	Drp2	dystrophin related protein 2
Tspan32	54.6	10.65	27.97	262.63	219.34	161.47	9.59	14.31	10.04	159.65	160.74	233.13	23.39	0	48.19	120.46	11.62	64.93	63.96	103.45	62.08	95.73	103.82	72.01	34.11	51.55	343.29	136.15	105.61	173.98	262.14	198.65	114.66	135.72	125.55	86.53	88.19	68.76	27027	ENSMUSG00000000244	Tspan32	tetraspanin 32
Lhx2	9.38	0	0.95	1.97	4.53	0	0	0	0	0	0.32	0.3	0	0	0	0	0	0	0	0	0	0	0	0	0	0	0	0	0	0	0	0	0	0	0	0	0	0	16870	ENSMUSG00000000247	Lhx2	LIM homeobox protein 2
Clec2g	0	0	0	5.92	20.85	8.67	0	0	0	0	0	0	0	0	0	0	0	0	0	0	0	0	0	0	0	0	0	0	17.92	4.1	19.14	0	2.34	1.51	0	0	0	0	70809	ENSMUSG00000000248	Clec2g	C-type lectin domain family 2/ member g
Gmpr	20.4	26.3	14.22	28.3	26.28	34.68	9.59	1.73	3.01	515.82	508.84	644.8	0	0	9.64	28.01	18.59	47.51	0	329.92	432.3	386.58	393.42	417.95	293.19	309.96	0	47.49	38.66	24.94	53.26	33.67	14.04	60.82	29.54	73.42	73.29	50.52	66355	ENSMUSG00000000253	Gmpr	guanosine monophosphate reductase
Mid2	6.07	7.51	4.74	9.87	3.63	0	1.47	0.43	7.03	0.72	0	0.3	0	0	0	0	0	0	0	0	0	0	0	0	0	0	0	0	0	0.32	0	1.12	4.68	6.03	0	7.87	14.91	10.66	23947	ENSMUSG00000000266	Mid2	midline 2
Trim25	154.97	186.62	237.48	253.42	206.65	488.75	308.99	450.14	563.24	1431.48	1426.43	1889.16	111.74	0	215.27	207.3	378.85	267.62	225.4	47.53	53.41	33.62	51	56.87	129.9	68.28	121.89	221.64	269.69	408.89	270.46	167.23	318.24	259.87	199.4	296.31	223.59	141.17	217069	ENSMUSG00000000275	Trim25	tripartite motif-containing 25
Dgke	22.61	23.8	27.97	11.85	2.72	9.75	15.49	19.95	29.12	44.03	19.89	27.44	18.19	0	0	0	9.3	0	0	0	10.91	6.58	10.93	12.52	3.63	2.01	2.49	0	16.03	10.74	4.16	12.35	0	13.57	4.92	9.61	1.24	12.07	56077	ENSMUSG00000000276	Dgke	diacylglycerol kinase/ epsilon
Scpep1	424.09	245.49	357.41	861.61	705.15	651.31	359.87	365.14	369.47	422.03	309.28	549.5	239.08	219.02	308.45	409	327.72	357.88	432.52	296.37	289.97	301.08	305.99	296.37	291.01	293.22	1029.87	1427.97	1399.37	1045.44	932.06	919.2	1319.78	879.64	763.15	931.76	1114.2	1757.97	74617	ENSMUSG00000000278	Scpep1	serine carboxypeptidase 1
Mnt	331.44	249.25	341.29	120.45	122.36	120.29	109.14	150.48	208.83	83.4	67.7	112.79	135.13	100.38	141.37	235.32	225.45	158.35	225.4	176.14	223.98	127.16	191.24	105.92	232.23	167.37	154.23	193.14	168.79	172.4	167.27	151.52	191.88	123.15	161.66	118.87	110.55	198.98	17428	ENSMUSG00000000282	Mnt	max binding protein
Itgb2	673.36	705.15	703.45	1375.69	2239.64	1258.18	2897.4	4227.35	3171.6	4724.34	5099.03	5479.6	696.46	661.61	1092.41	946.87	1006.39	984.96	1044.76	1140.74	1240.4	2087.85	1708.45	2001.57	2090.07	2483.03	825.89	1219	951.46	1049.86	727.34	728.4	1254.26	993.23	731.97	969.35	945.27	910.14	16414	ENSMUSG00000000290	Itgb2	integrin beta 2
Hddc2	184.2	145.29	155	26.33	69.79	54.19	53.1	49.44	70.28	75.17	48.45	27.44	166.32	0	73.9	39.22	111.56	91.85	85.29	16.78	41.1	31.42	25.5	38.61	39.19	11.38	32.34	0	57.52	22.42	39.95	59.48	58.5	33.17	30.36	14.86	37.26	32.84	69692	ENSMUSG00000000295	Hddc2	HD domain containing 2
Tpd52l1	2.76	0.63	0	10.53	0	27.09	2.21	3.04	2.01	0	0	0	0	0	9.64	0	4.65	0	0	0	0	0.73	0	0	0	0	0	0	0	0	0	0	0	0	0	0.87	0	0	21987	ENSMUSG00000000296	Tpd52l1	tumor protein D52-like 1
Pemt	11.58	6.89	9.01	13.82	6.34	11.92	3.69	6.5	0	9.31	8.98	12.97	0	0	9.64	22.41	0	0	0	2.8	4.47	2.19	5.46	1.57	0.73	5.36	0	0	8.49	13.58	9.99	4.49	0	6.03	7.39	4.37	12.42	7.3	18618	ENSMUSG00000000301	Pemt	phosphatidylethanolamine N-methyltransferase
Cdh1	1215.47	1074.01	903.48	127.7	91.54	125.71	4.42	5.64	18.07	80.9	82.78	60.92	530.14	488.22	9.64	44.82	25.57	0	0	0	0	0	1.82	1.57	0.73	8.7	0	0	0	0	0	0	0	1.51	0	0.87	1.24	0.56	12550	ENSMUSG00000000303	Cdh1	cadherin 1
Cdh4	13.79	3.76	0	0	0	0	0	0	0	0.36	0	0	0	0	0	0	0	0	0	0	0	0	0	0.52	0	0	0	0	0	0	0	4.49	0	0	0	0	0	0	12561	ENSMUSG00000000305	Cdh4	cadherin 4
Ckmt1	61.21	48.22	43.61	781.97	331.73	492	4.42	0	3.01	0	0	1.21	41.58	0	41.77	0	6.97	0	0	0	0.84	5.85	0	2.09	6.53	2.68	0	0	3.77	0	0	0	0	0	0	0	6.21	0	12716	ENSMUSG00000000308	Ckmt1	creatine kinase/ mitochondrial 1/ ubiquitous
Bcl6b	0	0	0	0	0	0	0	0	0	0	0	0	0	0	0	0	0	1.58	0	0	0	1.46	0	0	0	0	2.49	19	0.94	6	0.83	2.24	2.34	3.52	3.28	3.5	3.73	1.4	12029	ENSMUSG00000000317	Bcl6b	B cell CLL/lymphoma 6/ member B
Clec10a	6.62	3.76	3.79	125.06	124.17	92.11	3.69	7.81	1	3.22	1.93	3.02	80.56	228.14	86.75	5.6	18.59	671.42	502.58	25.16	6.71	0.73	0	2.09	7.26	2.68	2325.91	3827.98	2976.96	3491.23	3143.19	2886.66	755.83	185.48	200.22	319.91	248.43	323.59	17312	ENSMUSG00000000318	Clec10a	C-type lectin domain family 10/ member A
Alox12	15.99	1.88	5.69	0.66	0	4.33	0.74	1.3	15.06	1.43	2.57	3.62	18.19	0	0	0	0	0	0	11.18	2.24	0	3.64	2.61	5.81	1.34	0	0	0	0	0	0	0	0.5	0	0	1.24	0	11684	ENSMUSG00000000320	Alox12	arachidonate 12-lipoxygenase
Arvcf	20.4	15.03	0.95	17.11	32.63	17.34	46.46	43.37	55.22	13.24	5.78	10.56	0	0	25.7	25.21	9.3	6.33	48.74	260.02	321.29	320.08	280.49	296.37	280.13	336.74	0	69.66	48.09	17.37	23.3	46.02	11.7	27.14	36.93	29.72	31.05	21.05	11877	ENSMUSG00000000325	Arvcf	armadillo repeat gene deleted in velocardiofacial syndrome
Comt	76.1	93.31	46.93	540.4	415.12	577.61	1235.21	804.01	940.74	1250.71	1001.65	1373.75	569.12	1218.28	738.99	1285.83	1138.87	1809.99	1257.98	2415.69	2396.08	1824.03	1604.63	1599.27	1283.07	1050.38	3114.48	1684.44	876.02	1644.1	2460.79	2271.62	2255.79	2288.06	1642.82	2226.26	1940.23	1903.07	12846	ENSMUSG00000000326	Comt	catechol-O-methyltransferase
Rtca	140.63	176.6	110.92	109.27	100.61	93.2	104.72	117.96	173.69	98.8	109.73	95	93.55	100.38	44.98	44.82	60.43	172.61	88.33	44.74	96.75	83.31	65.57	126.79	136.44	143.93	104.48	246.97	45.26	97.25	84.88	65.1	93.6	52.78	64.01	73.42	98.13	80.55	66368	ENSMUSG00000000339	Rtca	RNA 3'-terminal phosphate cyclase
Dbt	28.68	34.44	18.49	25.67	35.35	32.51	48.67	55.51	104.41	60.14	23.74	25.03	184.51	22.81	0	95.25	0	28.5	51.78	44.74	44.46	38.73	49.18	58.96	51.53	16.07	114.43	0	15.09	30.31	95.7	32.55	91.26	36.69	40.21	23.6	33.54	48.27	13171	ENSMUSG00000000340	Dbt	dihydrolipoamide branched chain transacylase E2
Dazap2	1749.3	1511.76	1723.06	932.7	1040.51	1434.82	683.61	1023.01	1226.87	1213.84	969.88	867.98	1507.25	634.23	1230.57	764.78	880.88	905.79	380.74	145.39	329.11	407.05	336.95	503	909.33	759.84	616.93	516.1	613.87	1352.03	723.17	653.2	1333.82	812.78	811.56	817.26	843.41	1586.78	23994	ENSMUSG00000000346	Dazap2	DAZ associated protein 2
Mcts1	21.51	130.89	40.29	80.96	68.88	53.1	71.53	92.8	53.21	98.44	110.37	44.64	64.97	68.44	16.06	28.01	113.89	39.59	70.06	109.04	84.17	84.04	58.28	117.92	60.23	123.18	47.26	0	21.69	31.89	69.9	21.32	39.78	80.93	94.37	70.8	79.5	202.63	68995	ENSMUSG00000000355	Mcts1	malignant T cell amplified sequence 1
Rem1	1.1	1.25	0	2.63	9.97	0	2.21	0	0	20.4	17.65	21.71	12.99	41.07	0	0	0	4.75	24.37	2.8	0.84	0.73	0	0	0	0	139.31	0	21.69	16.42	44.11	40.4	7.02	2.01	8.21	7.87	6.21	3.93	19700	ENSMUSG00000000359	Rem1	rad and gem related GTP binding protein 1
Rnf17	0.55	0	0	1.97	0	0	8.11	7.37	10.04	2.86	0.64	2.71	0	0	0	0	0	0	0	0	6.43	10.23	7.29	1.57	2.18	0	0	0	0	1.89	0	0	0	1.51	1.64	6.12	0	2.25	30054	ENSMUSG00000000365	Rnf17	ring finger protein 17
Trappc10	115.26	108.97	178.23	110.58	165.87	189.65	136.43	80.66	126.5	150.34	108.12	156.83	231.29	0	115.67	215.71	195.23	213.78	115.75	450.15	343.93	205.35	220.39	170.62	234.41	211.55	194.03	196.31	152.76	228.29	130.65	148.15	102.96	152.81	141.96	229.01	223.59	145.94	216131	ENSMUSG00000000374	Trappc10	trafficking protein particle complex 10
Ccm2	336.4	398.29	398.18	300.15	258.31	280.68	402.64	320.91	270.07	287.44	314.74	380.61	200.1	91.26	170.29	204.5	146.43	242.28	313.73	631.88	432.58	524.7	519.09	452.91	418.74	534.9	532.35	497.1	449.8	413.63	408.61	531.99	603.73	489.58	498.92	443.16	470.77	216.1	216527	ENSMUSG00000000378	Ccm2	cerebral cavernous malformation 2
Tbrg4	157.72	125.25	223.26	121.11	105.14	143.05	118.73	146.58	117.47	116.69	168.44	130.59	179.31	36.5	163.86	30.82	60.43	82.34	103.56	83.88	68.51	74.54	71.03	100.7	127.73	127.87	67.17	41.16	121.64	96.93	99.86	118.97	74.88	65.85	115.7	54.19	39.75	65.67	21379	ENSMUSG00000000384	Tbrg4	transforming growth factor beta regulated gene 4
Tmprss2	0	3.76	0.95	199.44	131.42	180.98	0	0.87	0	0	0.96	0.3	0	0	0	0	0	0	0	0	0	0	0	0	0	0	0	0	0	0	0	0	0	0	0	0	0	0	50528	ENSMUSG00000000385	Tmprss2	transmembrane protease/ serine 2
Mx1	0	0	0	66.48	127.8	96.45	150.44	168.26	151.6	2.15	1.28	0	2.6	0	44.98	47.62	113.89	60.17	18.28	39.14	14.54	7.31	7.29	15.13	31.21	15.4	7.46	25.33	101.84	95.99	49.93	86.42	79.56	44.74	69.75	36.71	40.99	115.07	17857	ENSMUSG00000000386	Mx1	MX dynamin-like GTPase 1
Fap	34.74	98.32	47.4	9.87	8.16	10.84	4.42	2.6	11.04	1.79	0.32	0.6	12.99	0	3.21	2.8	2.32	15.84	0	2.8	0.56	0	1.82	0.52	0	2.01	0	0	0	0.63	12.48	0	9.36	4.02	4.1	6.12	7.45	5.33	14089	ENSMUSG00000000392	Fap	fibroblast activation protein
Gcg	0	0	0	163.24	5.44	7.59	0	0	0	0	0	0	0	0	0	0	0	0	0	0	0	0	0	0	0	0	0	0	0	0	0	0	4.68	0	0	0	0	0	14526	ENSMUSG00000000394	Gcg	glucagon
Ndufa9	157.72	207.29	157.37	391.64	261.03	257.92	323	205.12	173.69	341.49	390.46	293.75	218.29	173.39	224.91	277.34	327.72	190.03	298.5	329.92	338.34	469.16	489.95	458.65	224.25	291.22	161.69	117.15	351.73	140.19	230.52	189.68	177.84	301.09	269.15	250.86	326.68	287.38	66108	ENSMUSG00000000399	Ndufa9	NADH:ubiquinone oxidoreductase subunit A9
Lck	8.27	8.14	17.06	5.27	38.97	0	8.11	24.29	8.03	17.18	26.95	12.37	20.79	0	0	0	2.32	0	0	0	0	2.19	0	0.52	4.35	9.37	0	0	0	0	0	0	9.36	59.31	49.24	0	34.78	5.61	16818	ENSMUSG00000000409	Lck	lymphocyte protein tyrosine kinase
Cttnbp2	0.55	1.88	0	2.63	2.72	0	0	0	0	0	0	0	0	0	0	0	0	0	0	0	1.12	0	3.64	0	0	0	0	0	0	0.95	0	0	0	0	0.82	1.75	1.24	0.84	30785	ENSMUSG00000000416	Cttnbp2	cortactin binding protein 2
Galnt1	78.31	55.74	50.25	175.75	145.93	133.3	163.71	190.81	261.04	97.36	102.03	86.25	218.29	100.38	138.16	266.13	244.04	107.68	100.52	260.02	218.66	154.93	154.82	147.67	171.27	257.07	278.61	91.82	84.87	125.35	116.51	92.03	135.72	152.3	168.22	147.72	168.93	255.39	14423	ENSMUSG00000000420	Galnt1	polypeptide N-acetylgalactosaminyltransferase 1
Mkrn2	61.77	51.35	27.49	63.19	29.91	39.01	61.21	80.66	64.26	66.22	41.71	42.83	33.78	0	25.7	61.63	76.7	31.67	24.37	41.94	78.01	76.73	40.07	72.01	44.99	57.57	42.29	28.5	44.32	34.73	19.97	39.28	65.52	52.78	55.8	52.44	44.72	74.65	67027	ENSMUSG00000000439	Mkrn2	makorin/ ring finger protein/ 2
Pparg	3.86	9.39	3.79	108.61	61.63	99.7	608.39	915.03	1032.1	1367.05	1371.89	1963.96	0	0	22.49	75.64	27.89	11.08	39.6	2.8	0.28	0	0	9.91	2.9	7.36	39.8	22.16	0.94	10.1	10.82	3.37	53.82	28.15	33.64	19.23	21.12	13.19	19016	ENSMUSG00000000440	Pparg	peroxisome proliferator activated receptor gamma
Raf1	156.62	89.55	113.76	220.5	213.9	223.24	278.01	235.91	268.06	371.92	301.91	344.42	54.57	191.64	44.98	176.49	125.51	117.18	106.61	195.72	230.97	239.7	169.39	222.8	187.96	204.85	228.86	161.48	213.11	143.35	208.05	98.77	241.02	202.06	171.5	190.55	160.24	175.97	110157	ENSMUSG00000000441	Raf1	v-raf-leukemia viral oncogene 1
2001-09-01	2.76	1.25	1.42	3.29	0	0	5.16	2.17	0	2.51	1.93	2.11	7.8	0	0	0	0	0	0	0	1.4	3.65	3.64	4.17	0	2.01	0	0	0	2.84	0	0	4.68	18.6	10.67	1.75	6.21	2.25	54204	ENSMUSG00000000486	2001-09-01	septin 1
Pdgfb	19.3	27.55	29.86	429.82	638.08	516.93	219.76	188.21	179.71	9.31	7.06	21.41	210.5	333.09	623.32	893.64	620.57	524.15	694.48	726.94	802.51	924.44	1111.04	699.71	611.06	614.56	57.21	262.8	76.38	56.52	84.05	117.85	283.14	174.42	319.21	204.53	176.38	207.4	18591	ENSMUSG00000000489	Pdgfb	platelet derived growth factor/ B polypeptide
Acvrl1	142.28	101.45	121.82	780.65	561.04	618.79	1078.14	555.52	400.59	385.52	386.93	375.18	132.53	0	886.78	711.55	604.3	597	1117.86	262.82	184.27	271.12	304.17	295.33	104.5	157.99	497.52	436.94	374.36	344.17	416.1	408.53	367.39	647.41	636.78	409.94	560.21	297.77	11482	ENSMUSG00000000530	Acvrl1	activin A receptor/ type II-like 1
Grasp	2901.35	1759.75	2488.13	55.95	31.72	37.93	0	0.43	9.04	17.54	14.76	25.03	192.3	469.97	144.58	145.67	178.96	266.04	146.21	0	5.31	3.65	7.29	3.65	1.45	8.7	39.8	101.32	1.89	2.21	18.31	1.12	65.52	39.21	38.57	6.12	12.42	4.21	56149	ENSMUSG00000000531	Grasp	GRP1 (general receptor for phosphoinositides 1)-associated scaffold protein
Acvr1b	13.24	2.5	13.27	3.29	0	0	5.9	0	0	1.07	4.81	5.43	0	0	0	0	2.32	0	0	5.59	2.8	5.12	5.46	1.57	0	0.67	0	0	8.49	0	0	0	23.4	2.51	0	0	0	0	11479	ENSMUSG00000000532	Acvr1b	activin A receptor/ type 1B
Tom1l2	68.94	144.66	74.42	47.39	35.35	40.1	120.2	76.76	124.49	65.15	74.43	94.1	18.19	310.27	19.28	22.41	60.43	22.17	24.37	67.1	102.06	74.54	112.93	58.96	47.9	83.68	0	117.15	62.24	43.57	69.07	92.03	56.16	45.74	38.57	57.69	53.41	90.65	216810	ENSMUSG00000000538	Tom1l2	target of myb1-like 2 (chicken)
Gpa33	0	0.63	0	648.35	124.17	210.24	0	0	0	0.36	0	1.21	0	0	0	0	0	0	0	0	0	1.46	7.29	1.57	0	0.67	0	0	0	0	0	0	0	0	0	0	0	0	59290	ENSMUSG00000000544	Gpa33	glycoprotein A33 (transmembrane)
Zfp385a	130.15	133.39	47.88	411.39	267.38	231.91	717.53	415.45	272.08	195.45	161.38	138.73	974.52	1204.59	2480.42	941.26	834.4	1198.74	1602.17	1400.77	725.62	845.52	834.19	776.94	463.01	531.55	2395.57	1557.79	513.92	775.16	1013.61	1364.77	514.81	736.88	825.51	914.28	604.92	431.35	29813	ENSMUSG00000000552	Zfp385a	zinc finger protein 385A
Itga5	14.34	18.79	8.53	38.18	27.19	5.42	5.9	5.2	7.03	30.78	44.6	78.72	44.18	82.13	89.96	137.27	146.43	52.26	237.58	36.35	22.37	12.42	12.75	17.22	5.08	4.02	0	0	49.98	55.26	107.35	95.4	18.72	36.69	27.9	53.32	44.72	14.87	16402	ENSMUSG00000000555	Itga5	integrin alpha 5 (fibronectin receptor alpha)
Gabra2	0	0	0	0	0	0	0	0	0	0	0	0	0	0	0	0	0	0	0	0	0	0	0	0	0	0	2.49	0	0	0	0	0	0	0	0	0.87	0	0	14395	ENSMUSG00000000560	Gabra2	gamma-aminobutyric acid (GABA) A receptor/ subunit alpha 2
Wdr77	77.21	78.91	60.2	51.34	44.41	36.85	81.86	122.29	79.32	109.89	109.4	109.18	124.74	27.38	28.92	39.22	32.54	57.01	63.96	30.76	72.14	97.19	69.21	94.96	80.55	172.72	52.24	0	19.8	42.63	28.29	20.2	11.7	42.22	47.59	37.59	36.02	74.09	70465	ENSMUSG00000000561	Wdr77	WD repeat domain 77
Adora3	85.48	69.51	54.99	46.08	55.29	59.6	1.47	0	3.01	27.2	19.89	10.56	12.99	0	109.24	19.61	18.59	14.25	9.14	265.61	428.38	415.82	415.27	581.27	304.08	377.58	0	0	0	1.89	0	0	7.02	5.53	8.21	2.62	0	0.56	11542	ENSMUSG00000000562	Adora3	adenosine A3 receptor
Atp5pb	991.01	815.37	837.12	1451.38	1103.96	1162.81	765.46	882.5	971.86	1246.41	1362.26	1551.68	917.35	661.61	803.25	568.68	857.64	687.26	953.38	349.49	386.72	627.01	861.51	564.05	629.92	771.89	457.72	392.61	419.62	861.99	477.68	542.09	610.75	503.15	490.71	548.04	524.18	755.22	11950	ENSMUSG00000000563	Atp5pb	ATP synthase peripheral stalk-membrane subunit b
Sox9	4.41	14.4	13.27	38.84	8.16	44.43	0	0.87	0	0	0	0.6	0	0	0	25.21	0	11.08	0	0	0	1.46	0	0	0	0	0	0	0	0	0	0	0	0	0	0	1.24	0.28	20682	ENSMUSG00000000567	Sox9	SRY (sex determining region Y)-box 9
Hnrnpd	148.9	123.37	130.83	180.35	111.48	147.38	178.46	130.53	105.42	135.67	130.9	186.99	148.13	164.26	141.37	170.88	409.06	136.18	18.28	301.96	165.26	133	145.71	153.4	102.33	139.25	592.05	231.14	119.76	187.55	149.79	76.32	67.86	150.29	146.89	161.7	130.42	156.04	11991	ENSMUSG00000000568	Hnrnpd	heterogeneous nuclear ribonucleoprotein D
Dynlt1c	0	0	0	0	0	0	0	0	0	0	0	0	0	0	0	0	0	0	0	0	0.56	0	0	0	0	0	2.49	0	0.94	0	0	4.49	0	0	0	0	0	0	100040563	ENSMUSG00000000579	Dynlt1c	dynein light chain Tctex-type 1C
C1d	53.49	65.76	50.72	62.53	60.73	33.59	45.72	60.71	60.24	89.49	94.65	82.03	90.95	45.63	32.13	44.82	74.38	12.67	51.78	13.98	34.67	62.12	40.07	53.22	45.72	68.28	4.98	0	27.35	69.46	39.11	38.16	2.34	32.67	39.39	58.56	26.08	108.05	57316	ENSMUSG00000000581	C1d	C1D nuclear receptor co-repressor
Gm2a	1366.57	1554.97	1162.3	1125.56	1081.3	1088.04	960.88	650.49	830.3	669.03	697.49	430.07	1972.42	2368.11	992.81	1112.15	1361.99	712.59	910.74	687.8	476.48	675.97	608.34	484.22	145.14	247.03	559.71	373.62	364.93	239.34	289.6	310.89	898.57	1029.42	806.64	597.87	510.52	286.82	14667	ENSMUSG00000000594	Gm2a	GM2 ganglioside activator protein
Krit1	83.83	83.92	76.32	67.14	84.29	68.27	95.87	114.92	143.57	72.67	70.9	49.16	51.97	209.89	89.96	8.4	25.57	45.92	48.74	41.94	79.97	76	76.5	80.35	111.76	84.35	17.41	0	29.23	62.52	30.79	54.99	25.74	64.84	48.41	83.04	60.86	84.19	79264	ENSMUSG00000000600	Krit1	KRIT1/ ankyrin repeat containing
Clcn4	317.1	222.94	394.86	291.59	347.14	399.89	317.1	330.89	420.67	346.86	316.98	347.43	402.8	730.05	661.87	302.55	371.88	405.39	277.18	640.27	638.94	733.71	748.59	476.39	674.92	498.08	547.27	104.49	330.98	269.33	314.57	295.18	271.44	403.63	427.53	343.51	309.29	368.77	12727	ENSMUSG00000000605	Clcn4	chloride channel/ voltage-sensitive 4
Sema4f	100.92	97.07	101.91	0	0	1.08	0	0	1	0	0	0	0	0	0	0	0	0	0	0	0	0	0	0	0	0	0	0	0	0	0	0	0	0	0.82	0.87	0	0	20355	ENSMUSG00000000627	Sema4f	sema domain/ immunoglobulin domain (Ig)/ TM domain/ and short cytoplasmic domain
Hk2	354.6	108.97	189.61	312	165.87	513.68	104.72	34.69	92.37	137.81	81.81	133.3	0	104.95	205.63	134.47	343.98	152.02	76.15	1207.85	1699.54	740.28	717.62	630.32	307.7	241.68	258.71	231.14	89.58	88.09	50.76	76.32	182.52	152.3	179.71	147.72	89.43	99.91	15277	ENSMUSG00000000628	Hk2	hexokinase 2
Myo18a	153.86	201.02	120.4	186.28	143.21	89.95	308.25	117.52	76.3	55.84	76.68	51.57	405.4	401.53	408.05	274.54	309.12	142.52	127.93	581.56	432.3	354.43	442.59	426.82	119.02	157.99	131.84	335.62	134.84	112.41	125.66	169.47	140.4	328.73	243.71	245.61	325.44	165.3	360013	ENSMUSG00000000631	Myo18a	myosin XVIIIA
Sez6	0.55	0	0.95	0	0.91	1.08	0.74	0	0	1.07	0.32	0.6	0	0	0	0	0	0	0	0	0.28	0	0	0	0.73	7.36	0	0	0	0	0	0	0	0.5	0	0	0	0.28	20370	ENSMUSG00000000632	Sez6	seizure related gene 6
Haao	127.94	228.58	172.54	28.3	18.13	53.1	6.64	9.97	4.02	30.07	45.56	22.92	311.85	574.92	382.35	271.73	269.61	304.04	213.22	75.49	41.38	130.81	123.85	89.23	14.51	4.69	0	0	0	4.42	3.33	14.59	53.82	59.82	61.54	13.11	9.94	3.65	107766	ENSMUSG00000000673	Haao	3-hydroxyanthranilate 3/4-dioxygenase
Cd52	5796.08	6664.51	5628.51	4082.96	3320.03	3176.33	2082.53	1857.38	1207.8	1565.35	1685.99	978.96	8185.95	6333.21	5474.92	8028.76	7848.89	4764.88	9503.36	1196.66	1168.82	874.75	606.52	726.85	271.42	420.42	587.08	253.3	365.87	209.97	473.52	428.73	2695.72	4519.82	4292.5	2323.29	2420.93	1253.93	23833	ENSMUSG00000000682	Cd52	CD52 antigen
Abhd15	6.62	11.27	7.58	42.13	78.85	30.34	22.86	22.55	28.11	15.75	16.68	11.46	90.95	0	138.16	30.82	34.86	68.09	18.28	72.69	107.65	116.19	81.96	97.05	148.05	162.68	4.98	0	0.94	5.68	26.63	15.71	42.12	31.16	22.98	20.1	31.05	9.26	67477	ENSMUSG00000000686	Abhd15	abhydrolase domain containing 15
Hoxb6	0	0	0	55.95	24.47	9.75	0	0	0	0	0	0	0	0	0	0	0	0	0	0	0	0	0	0	0	0	0	0	0	0	0	0	0	0	0.82	0	0	0	15414	ENSMUSG00000000690	Hoxb6	homeobox B6
Loxl3	0	3.13	6.64	260.66	242	262.26	338.49	124.46	70.28	1.07	0.32	2.71	0	0	0	8.4	0	17.42	51.78	36.35	75.5	98.66	176.67	141.4	66.77	85.02	0	0	30.18	7.26	9.99	10.1	9.36	28.65	29.54	19.23	8.69	19.93	16950	ENSMUSG00000000693	Loxl3	lysyl oxidase-like 3
Btn1a1	0	0	0	1.32	0	0	0	1.73	0	0	0	0	0	0	0	0	0	0	0	0	0	0	0	0	0	0	0	0	0	0	0	0	0	0	0	0	0	0	12231	ENSMUSG00000000706	Btn1a1	butyrophilin/ subfamily 1/ member A1
Kat2b	38.6	81.41	60.2	87.54	56.19	18.42	113.57	114.05	70.28	50.83	21.82	26.24	49.38	0	3.21	89.64	123.18	64.93	30.46	117.43	109.89	61.39	81.96	65.22	63.14	76.32	37.31	47.49	25.46	47.36	34.95	66.22	67.86	113.6	85.34	103.14	96.89	110.01	18519	ENSMUSG00000000708	Kat2b	K(lysine) acetyltransferase 2B
Rab5b	35.29	47.59	43.14	72.4	31.72	34.68	45.72	54.21	40.16	99.51	68.66	101.03	38.98	114.07	19.28	33.62	39.51	19	18.28	19.57	44.74	50.42	63.75	50.61	29.03	38.16	0	3.17	42.43	31.57	29.96	57.24	51.48	34.68	36.11	57.69	36.02	84.19	19344	ENSMUSG00000000711	Rab5b	RAB5B/ member RAS oncogene family
Dnmt3l	0	0	0	1.32	0	0	0	0	0	0	0.96	0.3	0	0	0	0	0	0	0	0	0	0	0	0	0	0	0	0	0	0	0	0	0	0	0	1.75	1.24	0.56	54427	ENSMUSG00000000730	Dnmt3l	DNA (cytosine-5-)-methyltransferase 3-like
Aire	0	0	0	0	0	0	0	0	0	0	0	0	0	0	0	0	0	15.84	0	0	0	0	0	0	0	0	0	0	0	0	0	0	0	0	0	0	0	0	11634	ENSMUSG00000000731	Aire	autoimmune regulator (autoimmune polyendocrinopathy candidiasis ectodermal dystrophy)
Icosl	3.31	11.27	8.06	150.07	94.26	49.85	37.61	16.05	10.04	76.96	116.14	223.78	41.58	77.57	581.55	420.21	357.93	88.68	395.97	137	115.48	214.85	180.32	162.28	84.91	110.46	271.15	3.17	96.18	31.26	89.04	20.2	42.12	103.55	109.96	62.06	55.9	80.83	50723	ENSMUSG00000000732	Icosl	icos ligand
Spg7	183.64	179.11	198.14	159.29	205.75	187.48	201.32	259.33	119.47	160.37	183.2	202.67	262.47	392.4	57.83	277.34	253.34	318.29	560.45	220.88	156.87	204.62	116.57	140.36	284.48	271.13	32.34	360.95	288.55	204.92	342.86	222.22	229.32	198.55	165.76	240.37	255.88	140.88	234847	ENSMUSG00000000738	Spg7	SPG7/ paraplegin matrix AAA peptidase subunit
Sult5a1	41.36	31.31	18.01	0	0	11.92	0	0	1	0	0	0	0	0	0	0	0	0	0	0	0	0	0	0	0	0	0	0	0	0	14.15	0	0	2.01	0	0	0	0.28	57429	ENSMUSG00000000739	Sult5a1	sulfotransferase family 5A/ member 1
Rpl13	2651.53	3681.07	3658.01	3610.36	1552.61	1102.13	1701.27	1360.4	716.85	1935.48	2105	2771.02	4831.01	5302.01	4623.48	6488	5320.14	4188.47	5345.64	1853.71	1189.79	1156.1	927.08	1494.91	705.4	609.88	5420.5	3543.02	2942.07	4287.23	3307.96	3361.41	3844.68	3676.37	4445.95	3899.24	3325.21	2632.19	270106	ENSMUSG00000000740	Rpl13	ribosomal protein L13
Chmp1a	242.1	228.58	216.15	232.35	264.66	217.82	256.63	264.97	160.64	227.66	308.96	295.26	511.95	383.28	616.89	187.69	369.55	329.38	225.4	83.88	130.02	184.16	143.89	193.58	226.42	253.73	186.57	465.44	273.46	280.7	327.88	334.46	276.12	187.49	265.87	224.64	152.78	276.44	234852	ENSMUSG00000000743	Chmp1a	charged multivesicular body protein 1A
Rpa1	90.99	82.66	73.47	104.66	125.99	92.11	126.1	113.19	76.3	133.16	119.03	142.05	106.55	27.38	35.34	98.05	39.51	45.92	9.14	19.57	46.98	46.04	51	74.09	50.07	70.96	0	12.66	64.12	57.15	66.58	49.38	46.8	50.26	57.44	55.07	64.59	67.07	68275	ENSMUSG00000000751	Rpa1	replication protein A1
Serpinf1	25.92	16.28	15.17	166.53	154.08	164.72	3.69	0.43	0	0.36	0	0.6	153.32	679.86	234.55	249.32	290.53	207.44	246.72	447.35	658.79	583.9	506.34	638.14	379.55	544.94	126.87	161.48	86.75	88.73	146.47	147.03	435.25	727.84	772.17	538.43	504.31	378.59	20317	ENSMUSG00000000753	Serpinf1	serine (or cysteine) peptidase inhibitor/ clade F/ member 1
Tubgcp3	73.9	58.87	48.82	69.11	83.39	70.44	75.22	79.36	153.61	97.72	59.03	75.4	2.6	164.26	67.47	56.03	37.19	14.25	39.6	243.25	127.51	109.62	87.43	92.36	71.12	81.67	34.83	0	51.86	52.73	19.97	23.57	133.38	68.86	64.01	62.06	48.44	51.36	259279	ENSMUSG00000000759	Tubgcp3	tubulin/ gamma complex associated protein 3
Oprm1	0	0	0	0	0	0	0	0	0	0.36	0	0.3	0	0	0	0	0	0	0	0	0	0	0	0	0	0	0	0	0	0.32	0	0	0	0	0	0	0	0	18390	ENSMUSG00000000766	Oprm1	opioid receptor/ mu 1
Polr3d	20.4	31.94	26.07	31.59	26.28	66.11	38.35	78.49	35.14	46.53	49.09	52.18	10.39	22.81	25.7	14.01	48.81	17.42	63.96	145.39	53.69	49.69	43.71	23.48	35.56	35.48	0	47.49	55.64	37.57	39.95	13.47	39.78	32.67	35.29	22.73	31.05	17.12	67065	ENSMUSG00000000776	Polr3d	polymerase (RNA) III (DNA directed) polypeptide D
Tcf7	2.21	1.88	0	0	0	1.08	3.69	0.87	11.04	11.81	17.33	6.94	0	0	0	0	0	0	0	0	0	0	0	0	0.73	0	0	0	0	0	0	0	2.34	11.56	16.41	6.12	1.24	2.25	21414	ENSMUSG00000000782	Tcf7	transcription factor 7/ T cell specific
Ddx3x	571.89	643.78	694.44	340.3	231.12	203.74	356.18	264.1	358.42	705.18	477.72	541.05	358.62	228.14	183.14	470.63	395.12	365.8	207.12	405.41	534.64	481.59	431.67	458.65	344.72	425.11	308.46	170.98	320.61	692.75	420.26	397.31	723.07	973.13	641.7	848.73	934.09	1082.46	13205	ENSMUSG00000000787	Ddx3x	DEAD/H (Asp-Glu-Ala-Asp/His) box polypeptide 3/ X-linked
Il12rb1	0	0	0	16.46	36.25	29.26	0	1.73	0	0	1.28	0.9	0	0	0	0	0	0	0	0	0	0	0	0	0	0	0	0	4.71	0	0	2.24	0	1.51	3.28	3.5	4.97	1.4	16161	ENSMUSG00000000791	Il12rb1	interleukin 12 receptor/ beta 1
Slc5a5	0	0	0	0	0	0	1.47	1.3	0	0	0	0	0	0	0	0	0	0	0	2.8	0.56	1.46	1.82	4.7	0.73	6.69	0	0	0	0	0	0	0	0	0	0	2.48	0	114479	ENSMUSG00000000792	Slc5a5	solute carrier family 5 (sodium iodide symporter)/ member 5
Kcnn3	0	0	0	0.66	0	0	0	0	0	61.93	111.01	123.65	0	0	0	0	0	0	0	0	0	0	5.46	0	0.73	0	0	0	0	0.32	0	0	0	0	0	0	0	0	140493	ENSMUSG00000000794	Kcnn3	potassium intermediate/small conductance calcium-activated channel/ subfamily N/ member 3
Usp32	74.45	40.08	59.73	71.09	59.82	111.62	97.34	115.79	236.94	100.94	87.59	89.57	36.38	0	28.92	81.24	139.45	41.17	30.46	47.53	53.13	31.42	51	40.18	79.83	83.01	0	31.66	56.58	69.46	49.1	40.4	84.24	94.5	84.52	83.91	64.59	122.36	237898	ENSMUSG00000000804	Usp32	ubiquitin specific peptidase 32
Car4	0	0	0	159.29	75.23	42.26	19.91	1.3	0	1945.15	2737.68	4095.3	0	0	12.85	0	0	0	0	0	0	1.46	0	16.7	1.45	0	0	0	0	0	0	0	0	0.5	0.82	0	0	0.28	12351	ENSMUSG00000000805	Car4	carbonic anhydrase 4
Txnrd3	113.61	39.45	68.73	21.06	31.72	23.84	57.52	56.38	37.15	15.75	7.7	13.57	33.78	164.26	0	11.21	0	7.92	0	5.59	15.38	19.73	16.39	28.18	13.06	32.13	37.31	0	38.66	30.94	24.13	15.71	7.02	16.59	18.05	30.59	14.91	24.42	232223	ENSMUSG00000000811	Txnrd3	thioredoxin reductase 3
Fasl	4.96	0	0	1.32	4.53	0	0	3.47	0	2.86	1.6	3.32	0	0	0	0	0	0	0	0	0	0	0	0	0	0	0	0	0	0	0	0	4.68	3.02	0	0	3.73	3.09	14103	ENSMUSG00000000817	Fasl	Fas ligand (TNF superfamily/ member 6)
Zfp512b	35.85	12.52	15.64	21.72	27.19	13	58.26	46.84	51.2	40.81	24.38	13.27	64.97	155.14	12.85	16.81	4.65	7.92	0	41.94	57.04	30.69	54.64	41.22	43.54	42.18	0	0	28.29	20.52	24.97	24.69	11.7	21.11	19.69	13.99	14.91	20.77	269401	ENSMUSG00000000823	Zfp512b	zinc finger protein 512B
Dnajc5	302.76	326.27	311.43	325.16	403.33	436.73	551.61	453.61	666.65	727.37	544.14	684.01	540.53	118.63	401.62	607.9	576.41	342.05	319.82	696.19	643.13	493.28	422.56	470.13	423.82	465.28	228.86	405.28	446.97	337.53	423.59	420.88	318.24	373.47	401.27	305.05	424.81	382.52	13002	ENSMUSG00000000826	Dnajc5	DnaJ heat shock protein family (Hsp40) member C5
Tpd52l2	411.41	243.61	341.77	167.19	207.56	278.51	176.99	228.97	264.05	242.34	237.1	230.42	210.5	214.45	253.83	204.5	274.26	242.28	179.71	100.65	146.24	202.43	191.24	222.8	381.73	267.78	104.48	94.99	265.92	331.22	316.23	379.35	184.86	208.1	188.74	263.1	260.85	247.25	66314	ENSMUSG00000000827	Tpd52l2	tumor protein D52-like 2
Fmr1	35.29	56.36	16.59	37.52	17.22	32.51	60.47	48.14	24.1	40.45	38.82	28.95	23.39	4.56	51.41	16.81	69.73	76.01	15.23	41.94	80.53	47.5	38.25	38.61	16.69	29.46	17.41	0	5.66	46.1	41.61	15.71	70.2	71.38	54.16	70.8	55.9	108.89	14265	ENSMUSG00000000838	Fmr1	fragile X mental retardation 1
Bcl11a	8.82	5.01	9.95	15.8	0.91	4.33	13.27	4.77	5.02	5.37	1.6	0.6	57.17	45.63	3.21	0	0	0	0	5.59	7.83	3.65	5.46	2.09	2.9	4.69	0	0	4.71	0.32	0	0	9.36	36.19	30.36	3.5	3.73	0.28	14025	ENSMUSG00000000861	Bcl11a	B cell CLL/lymphoma 11A (zinc finger protein)
Il4	0	0	0	0	0	0	3.69	0.87	0	0	0.64	0	0	0	0	0	11.62	0	0	0	0	0	0	0	0	0	12.44	0	1.89	7.58	3.33	0	0	1.51	0	16.61	0	1.12	16189	ENSMUSG00000000869	Il4	interleukin 4
Pxmp4	197.98	149.67	196.24	109.27	87.01	141.97	185.1	161.32	111.44	376.93	373.45	331.15	431.39	469.97	147.8	308.15	202.21	220.11	109.65	220.88	183.15	184.16	174.85	130.97	119.74	119.83	201.5	402.11	148.05	141.77	238.84	186.31	72.54	145.27	128.83	145.97	106.82	139.2	59038	ENSMUSG00000000876	Pxmp4	peroxisomal membrane protein 4
Dlg3	9.93	0.63	2.84	27.65	36.25	16.26	3.69	0	9.04	1.07	0.32	1.21	0	0	38.56	22.41	0	58.59	18.28	36.35	63.47	44.58	78.32	52.18	82.01	71.63	0	6.33	12.26	10.1	0	14.59	2.34	13.57	14.77	3.5	17.39	21.89	53310	ENSMUSG00000000881	Dlg3	discs large MAGUK scaffold protein 3
Gnb1l	24.27	15.66	8.53	11.85	10.88	30.34	16.96	19.51	7.03	5.01	20.21	10.56	38.98	0	86.75	0	16.27	6.33	12.18	55.92	19.85	28.5	32.78	36.52	36.29	41.51	0	0	8.49	15.47	18.31	5.61	37.44	9.05	10.67	18.36	16.15	13.19	13972	ENSMUSG00000000884	Gnb1l	guanine nucleotide binding protein (G protein)/ beta polypeptide 1-like
Dbh	0	0	0	1.32	0	0	0	0	0	0	0	0	0	0	0	0	0	0	0	0	0	0	0	0	0	0	0	0	0	0	0	0	0	0	0	0	0	0	13166	ENSMUSG00000000889	Dbh	dopamine beta hydroxylase
Mmp11	0	0	0	2.63	0	7.59	0	0	0	1.07	0.96	0.6	0	0	0	0	0	0	45.69	36.35	45.3	18.27	41.89	29.74	11.61	11.38	0	0	11.32	2.53	19.14	0	0	11.06	3.28	14.86	8.69	13.75	17385	ENSMUSG00000000901	Mmp11	matrix metallopeptidase 11
Smarcb1	125.19	131.51	86.75	161.92	87.01	87.78	126.1	62.01	68.27	208.69	211.11	194.53	158.52	132.32	54.62	243.72	169.67	96.6	94.42	109.04	239.92	187.81	174.85	207.15	103.78	156.65	116.92	50.66	114.1	98.83	52.43	62.85	100.62	120.64	136.22	130.24	126.7	131.34	20587	ENSMUSG00000000902	Smarcb1	SWI/SNF related/ matrix associated/ actin dependent regulator of chromatin/ subfamily b/ member 1
Vpreb3	0	0	0	5.92	12.69	15.17	2.95	2.6	1	7.88	4.17	0.3	0	0	0	0	0	0	0	0	0	0	0	0	0	0	0	0	0	0	0	0	0	3.52	2.46	0	0	0	22364	ENSMUSG00000000903	Vpreb3	pre-B lymphocyte gene 3
Hip1r	140.63	273.04	156.43	32.25	6.34	45.52	16.22	7.37	14.06	52.26	56.15	45.24	127.34	196.2	0	2.8	13.95	0	0	33.55	9.51	5.12	12.75	15.13	11.61	2.01	0	3.17	5.66	5.05	0	0	14.04	26.14	14.77	0	8.69	3.93	29816	ENSMUSG00000000915	Hip1r	huntingtin interacting protein 1 related
Nsun5	51.84	49.47	50.72	72.4	106.95	47.68	98.82	147.88	153.61	63.72	58.07	66.95	28.59	100.38	41.77	44.82	37.19	31.67	103.56	97.86	95.91	105.96	91.07	160.19	186.51	121.17	119.41	63.32	69.78	67.89	52.43	97.64	109.98	74.89	48.41	82.16	75.77	42.1	100609	ENSMUSG00000000916	Nsun5	NOL1/NOP2/Sun domain family/ member 5
Top1mt	7.72	26.3	27.02	16.46	34.44	1.08	37.61	27.32	19.08	26.85	36.58	25.03	0	0	35.34	33.62	6.97	12.67	0	53.12	29.08	26.31	45.53	24	33.38	52.89	0	0	30.18	15.79	28.29	20.2	2.34	15.58	1.64	24.47	13.66	3.37	72960	ENSMUSG00000000934	Top1mt	DNA topoisomerase 1/ mitochondrial
Hoxa10	0	0	0	15.8	15.41	1.08	0	0	0	0	0	0	0	0	0	0	0	0	0	0	0	0	0	0	0	0	0	0	0	0	0	0	0	0	0	0	0	0	15395	ENSMUSG00000000938	Hoxa10	homeobox A10
Hoxa4	0	0	0	4.61	0	0	0	0	0	0	0.32	0	0	0	0	0	0	0	0	0	0	0	0	0	0	0	0	0	0	0	0	0	0	0	0	0	0	0	15401	ENSMUSG00000000942	Hoxa4	homeobox A4
NA	9.38	7.51	5.69	11.19	10.88	6.5	17.7	19.95	13.05	0	0	0.3	5.2	0	6.43	0	0	0	0	0	2.24	7.31	10.93	1.04	3.63	0.67	12.44	0	2.83	0.32	10.82	0	0	0	0.82	3.5	6.21	0	NA	ENSMUSG00000000948	NA	NA
Mmp14	333.1	305.61	363.57	1139.39	2002.17	1852.05	11.06	6.94	10.04	11.81	6.1	14.48	226.09	757.43	989.6	1112.15	846.02	1195.57	697.52	145.39	160.5	73.08	63.75	158.1	159.66	164.02	2.49	0	8.49	217.55	27.46	30.3	81.9	28.65	43.49	8.74	24.84	25.26	17387	ENSMUSG00000000957	Mmp14	matrix metallopeptidase 14 (membrane-inserted)
Slc7a7	50.74	33.82	34.6	441.01	471.31	444.32	1339.93	980.51	1225.87	244.49	295.17	314.26	0	141.45	347	226.91	439.28	278.7	265	631.88	813.7	1055.25	879.73	1028.44	838.21	793.31	271.15	357.78	365.87	229.23	199.73	142.54	313.56	327.22	237.15	343.51	373.88	368.77	20540	ENSMUSG00000000958	Slc7a7	solute carrier family 7 (cationic amino acid transporter/ y+ system)/ member 7
Oxa1l	300.01	291.83	251.23	283.69	345.33	275.26	238.93	271.47	336.34	238.4	196.35	229.81	194.9	146.01	186.35	344.57	241.72	254.95	335.05	226.47	217.55	263.81	222.21	343.33	359.96	399.67	54.73	250.13	320.61	240.28	332.04	178.45	259.74	230.72	262.59	176.56	250.91	203.47	69089	ENSMUSG00000000959	Oxa1l	oxidase assembly 1-like
Heatr6	75.55	88.3	37.92	106.63	125.99	125.71	141.59	134.44	147.59	162.16	107.48	145.07	70.17	196.2	144.58	414.6	241.72	145.69	170.57	223.68	247.19	119.12	147.53	124.18	143.69	87.7	236.32	22.16	78.27	105.14	207.22	142.54	91.26	141.75	113.24	107.51	109.31	84.47	217026	ENSMUSG00000000976	Heatr6	HEAT repeat containing 6
Ccl3	6.62	14.4	11.85	968.25	1411.22	1668.9	9.59	16.91	8.03	646.47	696.53	715.07	77.96	273.77	7100.69	5630.78	6089.46	3575.64	3055.09	153.78	79.41	92.08	74.68	122.1	96.52	73.64	129.36	208.97	667.62	549.09	292.93	309.77	1579.52	1319.45	930.55	911.66	1177.55	648.01	20302	ENSMUSG00000000982	Ccl3	chemokine (C-C motif) ligand 3
Wfdc18	0.55	0	0	28.3	9.06	28.18	6.64	12.14	3.01	3.94	0.96	5.73	0	0	167.08	288.54	227.77	117.18	109.65	0	0	0	0	0	0	1.34	121.89	0	92.41	23.05	26.63	13.47	74.88	41.72	53.34	69.05	70.8	103	14038	ENSMUSG00000000983	Wfdc18	WAP four-disulfide core domain 18
Icam4	23.71	18.79	17.06	4.61	0	0	16.22	4.34	2.01	2.86	3.21	7.24	23.39	0	0	0	79.02	11.08	0	0	0	1.46	0	0	0	2.01	0	3.17	3.77	2.21	0	0	2.34	2.01	1.64	2.62	3.73	6.17	78369	ENSMUSG00000001014	Icam4	intercellular adhesion molecule 4/ Landsteiner-Wiener blood group
Ilf2	65.63	38.2	58.78	57.92	34.44	41.18	32.45	36.86	25.1	55.13	62.56	69.97	2.6	22.81	6.43	64.43	65.08	23.75	82.24	89.47	131.14	67.96	61.93	73.57	46.45	50.88	47.26	41.16	56.58	38.84	52.43	47.14	56.16	44.74	66.47	75.17	19.87	27.5	67781	ENSMUSG00000001016	Ilf2	interleukin enhancer binding factor 2
Chtop	341.37	317.51	323.76	162.58	150.46	172.31	168.14	160.02	215.86	196.52	194.75	230.11	226.09	200.76	154.22	128.86	246.37	283.45	234.54	290.78	168.33	184.89	209.46	192.02	190.14	207.53	184.08	142.48	215	210.6	224.69	249.16	180.18	177.94	230.59	218.52	151.54	222.27	66511	ENSMUSG00000001017	Chtop	chromatin target of PRMT1
Snapin	162.14	132.76	145.52	134.94	147.74	201.57	137.16	199.05	207.83	219.07	153.36	158.03	184.51	73.01	80.32	75.64	95.29	191.61	97.47	123.02	136.74	118.39	134.78	190.97	234.41	269.79	246.27	151.98	197.08	205.24	178.92	180.7	168.48	57.8	66.47	84.79	96.89	145.38	20615	ENSMUSG00000001018	Snapin	SNAP-associated protein
S100a4	19770.1	10790.2	13851.8	96.76	30.82	133.3	9.59	22.98	87.35	295.32	207.58	166.48	9724.38	18972.2	379.13	764.78	1331.78	1046.72	3914.04	8.39	10.91	11.69	0	8.87	18.14	60.92	5751.35	4141.44	2244.27	1447.07	3078.28	2595.97	2056.89	760.51	733.61	1060.25	1018.56	1702.69	20198	ENSMUSG00000001020	S100a4	S100 calcium binding protein A4
S100a3	0	0	0.47	0	0	0	0	1.73	0	0	0	0	0	0	0	0	0	0	0	0	0	0	0	0	0	0	0	0	0	0	0	0	0	0	0	0.87	0	0	20197	ENSMUSG00000001021	S100a3	S100 calcium binding protein A3
S100a5	0	1.88	0	0	0	0	0	0	0	0	0	0	0	0	0	0	0	0	0	0	0	0	0	0	0	0	0	0	0	0	0	0	0	0	0	0	6.21	0	20199	ENSMUSG00000001023	S100a5	S100 calcium binding protein A5
S100a6	13486.5	7231.26	11411.1	1097.92	771.32	1805.45	22.12	29.49	93.37	241.26	284.26	133.3	5766.54	8427.55	414.47	579.89	562.46	790.19	2068.2	25.16	0.84	6.58	0	3.65	7.26	41.51	3044.83	3334.05	3222.13	1660.2	2021.39	1712.69	1865.01	467.97	459.53	914.28	629.77	1017.63	20200	ENSMUSG00000001025	S100a6	S100 calcium binding protein A6 (calcyclin)
Scn4a	0	0	0	1.97	0	0	0	3.9	0	0.36	0	0	0	0	0	0	0	0	0	0	0	0	0	0	0	0	0	0	0	0	0	0	0	1.01	3.28	0	0	0	110880	ENSMUSG00000001027	Scn4a	sodium channel/ voltage-gated/ type IV/ alpha
Icam2	0	0	0	22.38	29	14.09	18.44	4.34	2.01	30.07	30.48	9.35	0	0	12.85	0	16.27	52.26	0	13.98	10.07	9.5	7.29	5.74	7.98	8.7	29.85	47.49	6.6	16.1	6.66	3.37	37.44	61.32	51.7	19.23	36.02	9.82	15896	ENSMUSG00000001029	Icam2	intercellular adhesion molecule 2
Mapk7	87.13	86.42	82.48	86.23	170.4	40.1	116.52	130.1	114.45	59.06	54.86	67.86	137.73	68.44	99.6	8.4	104.59	76.01	134.02	92.27	88.08	86.96	83.78	110.62	180.7	135.9	22.39	37.99	100.9	138.3	137.31	48.26	112.32	70.37	73.85	45.45	63.35	32.27	23939	ENSMUSG00000001034	Mapk7	mitogen-activated protein kinase 7
Epn2	22.06	23.17	8.06	11.19	15.41	0	69.32	37.3	58.23	0.72	0	0	0	0	6.43	5.6	0	19	24.37	128.61	144.56	134.46	147.53	83.49	87.81	112.47	149.26	66.49	74.49	51.47	67.41	61.73	14.04	29.66	25.44	40.21	68.32	31.99	13855	ENSMUSG00000001036	Epn2	epsin 2
B9d1	36.4	5.01	21.8	21.72	16.31	24.93	7.37	4.34	2.01	1.43	5.13	3.02	67.57	63.88	6.43	50.42	39.51	19	0	0	6.99	6.58	3.64	10.44	1.45	8.03	101.99	0	11.32	1.89	19.97	15.71	0	15.58	6.56	0	32.3	9.26	27078	ENSMUSG00000001039	B9d1	B9 protein domain 1
Sec24b	80.52	115.23	146	117.16	217.53	137.63	142.33	203.82	153.61	86.27	104.91	167.99	28.59	77.57	228.12	165.28	199.88	139.35	179.71	167.76	157.99	139.58	153	116.88	246.74	175.4	82.09	174.14	117.87	159.45	65.74	159.37	114.66	155.32	164.94	104.01	115.52	143.41	99683	ENSMUSG00000001052	Sec24b	Sec24 related gene family/ member B (S, cerevisiae)
N4bp3	111.4	170.34	81.06	8.56	9.06	19.51	4.42	1.73	1	12.89	21.18	31.67	44.18	410.65	22.49	2.8	32.54	1.58	0	0	1.68	7.31	0	10.96	0	2.01	59.7	0	29.23	33.47	87.38	19.08	98.28	12.57	15.59	7.87	17.39	2.53	212706	ENSMUSG00000001053	N4bp3	NEDD4 binding protein 3
Rmnd5b	180.33	219.81	189.13	70.43	85.2	136.55	112.83	140.94	73.29	147.84	123.52	125.76	397.6	155.14	131.73	50.42	53.46	66.51	51.78	72.69	92.83	116.93	111.1	133.58	163.29	174.06	34.83	120.32	172.56	126.93	125.66	72.95	49.14	67.35	56.62	71.67	79.5	91.21	66089	ENSMUSG00000001054	Rmnd5b	required for meiotic nuclear division 5 homolog B
Nhp2	455.52	347.57	375.42	233.67	322.67	458.41	206.48	156.99	127.51	421.32	520.07	432.48	498.95	209.89	324.51	445.42	302.15	302.46	709.71	218.08	129.46	192.2	136.6	168.01	185.06	189.46	315.93	493.93	274.4	291.12	379.48	345.68	435.25	271.93	256.84	306.8	295.63	127.98	52530	ENSMUSG00000001056	Nhp2	NHP2 ribonucleoprotein
Vps9d1	100.92	171.59	150.26	267.9	263.75	289.35	326.69	356.9	213.85	152.13	176.14	112.49	350.83	333.09	244.19	98.05	53.46	147.27	271.09	296.37	285.49	285.01	367.92	436.21	428.9	492.72	39.8	151.98	135.79	132.3	140.64	134.68	196.56	131.19	129.65	118.87	131.67	110.29	72325	ENSMUSG00000001062	Vps9d1	VPS9 domain containing 1
Zfp276	45.77	63.25	55.46	77.01	97.89	79.11	131.26	140.94	117.47	63.72	102.03	73.89	51.97	0	57.83	47.62	48.81	31.67	51.78	173.35	144.56	181.23	122.03	156.54	349.07	228.29	2.49	22.16	96.18	44.2	77.39	191.92	23.4	47.25	72.21	101.39	70.8	37.33	57247	ENSMUSG00000001065	Zfp276	zinc finger protein (C2H2 type) 276
Mfsd10	402.58	306.86	258.34	276.45	253.78	274.18	325.95	156.55	135.54	258.8	282.33	270.83	413.2	91.26	828.95	257.73	241.72	166.27	194.94	366.27	326.6	295.24	406.17	448.21	165.46	174.06	256.22	243.8	198.02	201.76	231.35	173.96	414.19	255.85	290.49	267.47	229.8	302.82	68294	ENSMUSG00000001082	Mfsd10	major facilitator superfamily domain containing 10
Luzp1	104.23	154.68	158.32	115.85	89.73	128.96	106.19	74.16	76.3	200.46	180.31	226.8	148.13	410.65	266.68	215.71	297.5	383.22	130.98	81.08	93.67	52.62	87.43	40.7	58.78	47.53	161.69	180.48	107.5	168.93	119	76.32	77.22	103.04	128.01	156.46	124.21	79.98	269593	ENSMUSG00000001089	Luzp1	leucine zipper protein 1
Slc13a2	0	1.25	0	92.81	67.98	24.93	28.02	19.95	12.05	4.65	6.42	3.92	0	0	0	0	0	0	0	5.59	0.56	4.38	12.75	0	0	0.67	7.46	0	0	0.95	12.48	0	0	1.51	1.64	0.87	0	1.96	20500	ENSMUSG00000001095	Slc13a2	solute carrier family 13 (sodium-dependent dicarboxylate transporter)/ member 2
Kctd10	172.06	204.78	207.15	281.06	158.61	135.46	113.57	121.86	88.35	278.13	246.72	327.53	408	13.69	504.44	92.45	178.96	117.18	185.8	75.49	68.23	51.15	32.78	90.27	99.42	93.72	149.26	706.07	324.38	220.39	297.92	231.2	264.42	286.01	208.43	291.94	291.9	213.01	330171	ENSMUSG00000001098	Kctd10	potassium channel tetramerisation domain containing 10
Poldip2	107.54	122.74	81.06	154.68	130.52	106.2	199.11	203.39	167.67	140.68	169.72	141.45	18.19	0	89.96	58.83	25.57	42.76	36.55	134.21	177	133.73	233.14	221.24	215.54	222.93	0	0	132.02	42.31	24.97	95.4	128.7	61.83	102.57	65.56	114.28	93.74	67811	ENSMUSG00000001100	Poldip2	polymerase (DNA-directed)/ delta interacting protein 2
Sebox	0	1.88	3.32	0	0	0	0	0	0	0	0	0	0	0	0	0	0	0	0	0	0	0	0	0	0	0	0	0	0	0	0	0	0	0	0	0	0	0	18292	ENSMUSG00000001103	Sebox	SEBOX homeobox
Ift20	751.12	311.24	545.12	442.33	326.29	417.23	304.56	405.48	338.34	370.49	367.36	335.97	836.79	428.91	510.86	420.21	278.91	351.55	505.63	299.17	302.83	431.16	462.63	379.86	446.32	309.29	616.93	946.71	448.85	569.29	441.06	384.96	507.79	434.79	398.81	463.26	485.68	388.42	55978	ENSMUSG00000001105	Ift20	intraflagellar transport 20
Col6a1	0	0	0	18.43	29	3.25	0	2.17	0	0.36	0	0.6	0	0	0	0	0	14.25	0	0	0	0	0	0	0	0	0	0	3.77	1.58	0	0	11.7	8.04	9.85	2.62	2.48	30.59	12833	ENSMUSG00000001119	Col6a1	collagen/ type VI/ alpha 1
Pcbp3	2.76	0	6.16	20.4	7.25	1.08	12.54	0	1	0	0	0.6	7.8	0	0	0	0	11.08	0	2.8	5.31	4.38	3.64	2.09	0	1.34	0	0	6.6	8.84	13.32	20.2	9.36	15.08	8.21	2.62	18.63	7.58	59093	ENSMUSG00000001120	Pcbp3	poly(rC) binding protein 3
Lgals9	257.54	157.19	176.34	1377.66	794.88	1129.22	882.72	798.37	667.65	581.68	492.16	410.77	1140.83	1209.15	3299.73	2322.34	2296.33	1721.31	1194.01	1255.38	1766.37	2274.19	1999.87	1974.96	1310.65	1522.35	1917.95	3397.37	794.92	811.79	1445.52	1136.93	1258.94	957.04	703.24	1282.27	1106.75	1723.45	16859	ENSMUSG00000001123	Lgals9	lectin/ galactose binding/ soluble 9
Araf	313.79	365.1	278.72	190.23	192.15	251.42	370.93	414.58	431.71	219.43	176.46	155.92	98.75	155.14	80.32	226.91	158.05	221.7	188.85	176.14	176.72	224.35	209.46	207.67	229.33	273.14	154.23	158.31	247.06	275.65	251.32	202.02	173.16	213.12	201.04	165.2	166.45	140.88	11836	ENSMUSG00000001127	Araf	Araf proto-oncogene/ serine/threonine kinase
Cfp	3265.33	4139.49	4458.16	2091.83	1478.29	1015.43	19306.2	13428	10401.3	734.53	1325.37	1567.37	2731.25	1688.25	404.84	350.17	304.47	1086.31	877.23	13.98	14.82	25.58	9.11	43.31	17.42	47.53	3987.63	6848.57	5738.92	4451.42	4919.92	4214.39	2801.02	2352.4	1402.39	2918.53	4112.73	3125.85	18636	ENSMUSG00000001128	Cfp	complement factor properdin
Timp1	38.05	117.73	58.3	3.95	8.16	1.08	0.74	1.73	0	3.22	2.89	6.63	25.99	0	16.06	50.42	23.24	58.59	0	0	0	0	0	0	0	0	0	0	21.69	22.73	0	0	18.72	13.07	2.46	11.36	0	9.82	21857	ENSMUSG00000001131	Timp1	tissue inhibitor of metalloproteinase 1
Uxt	110.85	57.61	83.9	36.86	34.44	27.09	66.37	46.84	56.22	87.34	79.57	66.95	111.74	255.52	170.29	14.01	62.75	20.59	97.47	11.18	18.18	12.42	20.04	33.39	35.56	42.85	101.99	72.82	41.49	73.89	45.77	61.73	65.52	27.65	19.69	41.96	31.05	45.46	22294	ENSMUSG00000001134	Uxt	ubiquitously expressed prefoldin like chaperone
Cnnm3	24.82	37.57	17.54	36.86	43.51	50.93	56.05	50.3	47.19	70.52	80.85	53.08	33.78	59.32	77.11	100.85	2.32	30.09	112.7	97.86	47.82	60.65	81.96	43.83	82.01	97.74	72.14	94.99	134.84	45.78	54.92	47.14	35.1	44.23	56.62	71.67	28.57	57.25	94218	ENSMUSG00000001138	Cnnm3	cyclin M3
Lman2l	88.79	75.78	34.13	78.99	79.76	92.11	128.31	100.18	59.24	50.11	70.26	71.48	85.76	159.7	51.41	137.27	41.84	44.34	39.6	204.1	183.71	222.89	189.42	165.93	81.28	107.11	69.65	0	42.43	25.58	79.06	32.55	84.24	88.47	73.03	111.01	75.77	74.09	214895	ENSMUSG00000001143	Lman2l	lectin/ mannose-binding 2-like
Mcm3ap	76.1	108.97	72.05	89.52	96.98	83.45	71.53	79.79	131.52	65.86	68.02	78.72	5.2	77.57	3.21	72.84	11.62	45.92	9.14	111.84	93.39	76	69.21	80.88	135.71	110.46	0	44.33	66.01	48.63	64.08	81.93	135.72	68.86	84.52	77.79	85.71	64.27	54387	ENSMUSG00000001150	Mcm3ap	minichromosome maintenance complex component 3 associated protein
Pcnt	121.33	129.63	120.4	79.65	136.86	127.88	120.94	107.11	122.49	114.19	75.4	99.83	103.95	241.83	192.78	151.27	253.34	38.01	36.55	433.37	309.54	113.27	105.64	78.27	103.05	87.03	146.77	544.59	196.14	112.41	168.94	158.25	133.38	322.2	274.9	273.58	196.26	162.78	18541	ENSMUSG00000001151	Pcnt	pericentrin (kendrin)
Mxd1	102.58	104.58	88.64	321.21	315.42	487.67	53.1	46.84	82.33	150.34	119.03	131.8	124.74	269.21	54.62	44.82	20.92	98.18	39.6	22.37	34.11	45.31	29.14	32.35	40.64	48.87	156.72	44.33	96.18	103.88	50.76	98.77	63.18	75.9	35.29	69.93	50.93	33.96	17119	ENSMUSG00000001156	Mxd1	MAX dimerization protein 1
Gmcl1	8.82	8.14	12.8	24.35	4.53	14.09	16.22	15.18	15.06	85.91	50.37	55.49	0	0	0	2.8	44.16	0	0	33.55	39.43	47.5	49.18	17.22	6.53	44.18	0	0	3.77	11.37	8.32	6.73	0	13.57	6.56	25.35	19.87	34.52	23885	ENSMUSG00000001157	Gmcl1	germ cell-less/ spermatogenesis associated 1
Snrnp27	225	231.08	228.48	175.75	230.22	141.97	125.36	117.96	264.05	217.28	201.16	180.05	197.5	177.95	302.02	484.64	374.2	172.61	167.53	545.21	412.16	298.16	315.1	255.67	273.6	168.7	422.89	284.96	205.57	220.71	253.82	233.45	119.34	303.1	329.88	275.33	370.16	186.07	66618	ENSMUSG00000001158	Snrnp27	small nuclear ribonucleoprotein 27 (U4/U6,U5)
Oas1c	78.31	47.59	45.51	19.09	7.25	24.93	7.37	5.2	0	43.67	37.86	35.89	33.78	0	41.77	70.03	2.32	34.84	51.78	8.39	27.4	27.77	18.21	10.44	4.35	7.36	2.49	0	56.58	16.42	49.93	15.71	28.08	30.66	36.11	17.48	45.96	24.7	114643	ENSMUSG00000001166	Oas1c	2'-5' oligoadenylate synthetase 1C
Ocrl	26.47	46.34	39.82	77.67	85.2	82.36	94.39	70.25	126.5	80.18	51.01	40.71	23.39	241.83	48.19	89.64	44.16	33.25	36.55	30.76	43.34	28.5	30.96	28.18	36.29	25.44	92.04	120.32	82.04	132.61	133.98	57.24	65.52	89.47	102.57	161.7	141.6	110.01	320634	ENSMUSG00000001173	Ocrl	OCRL/ inositol polyphosphate-5-phosphatase
Calm1	9793.23	7155.49	12563	4980.78	3577.44	4565.64	3157.72	2853.07	3628.41	7315.61	6601.81	5787.23	4108.56	4366.63	4199.37	5608.36	6675.16	5198.77	3758.7	4624.48	2653.05	2532.89	2316.79	1499.09	920.94	895.74	3962.76	2624.81	3237.22	4938.3	3992.03	3322.13	5485.04	10983.9	9051.09	10750.2	10010.4	6137.75	12313	ENSMUSG00000001175	Calm1	calmodulin 1
Agpat3	31.99	16.91	16.59	225.11	335.36	357.62	577.42	731.16	574.28	204.39	199.24	164.67	62.37	0	176.71	100.85	199.88	209.03	252.81	391.43	392.31	406.32	462.63	335.51	484.78	459.92	196.52	205.81	411.14	254.49	411.94	280.59	259.74	243.28	233.05	340.89	314.26	325.27	28169	ENSMUSG00000001211	Agpat3	1-acylglycerol-3-phosphate O-acyltransferase 3
Slc26a3	0	0	0	67.14	13.6	26.01	0	0	0	0.36	0	0	0	0	0	0	2.32	0	0	0	0	0	0	0	0	0	0	0	0	0	0	0	0	0	0	0	0	0	13487	ENSMUSG00000001225	Slc26a3	solute carrier family 26/ member 3
Sema6b	2.21	0.63	7.11	25.67	17.22	1.08	15.49	8.67	0	13.24	41.07	15.08	0	0	77.11	2.8	32.54	17.42	21.32	5.59	12.02	33.62	3.64	10.44	0.73	3.35	82.09	12.66	41.49	51.15	161.45	49.38	9.36	43.73	77.14	75.17	79.5	37.61	20359	ENSMUSG00000001227	Sema6b	sema domain/ transmembrane domain (TM)/ and cytoplasmic domain/ (semaphorin) 6B
Uhrf1	21.51	1.88	7.11	4.61	3.63	26.01	6.64	4.34	3.01	16.11	12.83	10.56	0	0	28.92	0	20.92	7.92	0	5.59	5.03	5.12	0	5.74	0.73	0	0	0	0	2.84	0.83	1.12	16.38	12.06	18.05	7.87	14.91	12.07	18140	ENSMUSG00000001228	Uhrf1	ubiquitin-like/ containing PHD and RING finger domains/ 1
Dpp9	341.92	311.87	369.26	338.99	329.92	324.03	283.18	345.2	435.73	540.16	382.43	466.26	353.42	255.52	401.62	355.78	155.72	356.3	286.32	369.06	305.07	283.54	302.35	306.29	275.77	350.8	233.84	376.78	302.69	338.17	467.69	296.3	365.05	448.87	343.83	612.73	418.6	360.63	224897	ENSMUSG00000001229	Dpp9	dipeptidylpeptidase 9
Ramp2	0	0	0	22.38	4.53	3.25	0	0	0	4.65	0.64	2.41	0	0	0	0	13.95	0	0	8.39	15.94	14.62	18.21	14.61	12.34	17.41	14.93	34.83	13.2	14.21	4.99	8.98	70.2	9.05	7.39	4.37	23.6	12.35	54409	ENSMUSG00000001240	Ramp2	receptor (calcitonin) activity modifying protein 2
Lsr	1310.87	1270.65	1605.03	243.54	87.92	206.99	19.17	17.35	8.03	858.03	1019.61	1380.08	1842.49	1318.66	67.47	92.45	20.92	38.01	67.01	0	6.99	16.08	3.64	6.78	4.35	13.39	12.44	69.66	30.18	60.94	83.22	52.75	131.04	141.75	220.74	83.91	62.11	64.27	54135	ENSMUSG00000001247	Lsr	lipolysis stimulated lipoprotein receptor
Gramd1a	586.78	1301.97	719.09	432.45	560.14	418.31	306.78	297.93	280.11	181.13	276.56	243.69	413.2	657.05	694	266.13	460.2	636.58	1044.76	1000.95	682.28	1169.98	1413.39	1123.4	799.02	1739.93	258.71	421.11	654.42	439.52	631.63	762.07	379.09	388.55	328.24	387.21	398.73	182.98	52857	ENSMUSG00000001248	Gramd1a	GRAM domain containing 1A
Hpn	3.31	2.5	4.27	51.34	27.19	53.1	187.31	99.74	52.21	7.52	5.13	10.86	0	0	0	0	9.3	14.25	15.23	61.51	19.29	27.77	38.25	30.26	15.24	18.08	0	22.16	31.12	23.05	19.14	14.59	4.68	3.02	13.13	11.36	17.39	12.91	15451	ENSMUSG00000001249	Hpn	hepsin
Ckb	4.96	16.28	6.16	278.43	222.97	342.45	735.97	655.27	520.07	12.17	16.68	9.65	62.37	77.57	934.98	1008.5	564.79	834.53	938.15	1915.22	1959.31	2193.08	2225.72	2234.8	1454.34	2080.01	440.31	319.79	561.07	396.26	416.1	570.15	669.25	975.14	847.67	865.33	698.08	401.04	12709	ENSMUSG00000001270	Ckb	creatine kinase/ brain
Sp1	259.75	180.99	220.42	113.21	154.99	177.73	127.58	185.17	286.14	175.4	117.43	104.05	54.57	360.46	240.97	78.44	120.86	201.11	207.12	209.7	203.56	192.93	244.06	170.62	312.78	277.16	243.79	170.98	214.05	216.29	152.29	251.4	149.76	186.99	166.58	177.44	132.91	273.07	20683	ENSMUSG00000001280	Sp1	trans-acting transcription factor 1
Itgb7	280.15	345.06	321.39	95.44	53.48	58.52	20.65	19.08	22.09	22.19	42.67	13.57	2138.74	1624.37	51.41	70.03	118.54	83.93	420.34	0	0.56	0.73	12.75	4.7	3.63	6.03	22.39	0	63.18	42.94	33.29	109.99	173.16	295.56	148.53	41.08	48.44	29.75	16421	ENSMUSG00000001281	Itgb7	integrin beta 7
Myg1	149.45	165.96	141.73	173.77	148.64	157.14	193.21	130.1	105.42	186.85	182.23	212.92	119.54	164.26	231.33	114.86	123.18	228.03	255.86	220.88	176.44	273.31	220.39	248.89	176.35	184.77	92.04	227.97	209.34	149.03	297.09	253.65	159.12	284	249.46	236.87	247.19	202.91	60315	ENSMUSG00000001285	Myg1	melanocyte proliferating gene 1
Rarg	17.1	40.71	13.75	47.39	20.85	2.17	39.82	29.92	8.03	37.23	51.65	59.41	38.98	4.56	102.82	16.81	116.21	55.42	161.44	8.39	4.47	23.39	43.71	14.09	8.71	14.06	206.47	250.13	88.64	90.94	89.88	176.21	107.64	91.98	121.45	132.86	96.89	101.87	19411	ENSMUSG00000001288	Rarg	retinoic acid receptor/ gamma
Pfdn5	3188.12	2495.59	3060.27	1500.09	1465.6	1777.27	1110.58	963.6	864.43	1291.16	1475.84	1205.76	1728.14	1168.08	1596.85	2008.59	2017.42	1808.41	2918.02	1006.54	714.99	1067.67	981.72	1120.79	761.28	789.96	1368.18	1399.48	2628.06	1160.37	2097.96	1556.69	2265.15	3230.02	2916.37	2939.51	3045.73	1503.43	56612	ENSMUSG00000001289	Pfdn5	prefoldin 5
Efnb2	8.82	1.88	20.86	9.22	5.44	3.25	0.74	0	1	0	0	0.3	15.59	0	9.64	0	2.32	0	0	0	2.8	5.85	1.82	3.65	15.24	1.34	0	0	0	0.63	0	0	0	0	0	0.87	0	0	13642	ENSMUSG00000001300	Efnb2	ephrin B2
Rrp15	102.02	35.7	51.19	44.1	32.63	37.93	51.62	61.58	84.33	72.31	61.28	79.02	57.17	114.07	77.11	114.86	65.08	49.09	18.28	55.92	40.27	55.54	69.21	48.53	52.25	36.15	62.19	98.15	92.41	52.41	37.45	20.2	84.24	36.69	61.54	62.93	57.14	51.92	67223	ENSMUSG00000001305	Rrp15	ribosomal RNA processing 15 homolog (S, cerevisiae)
Rnd2	18.2	8.77	0.95	20.4	20.85	52.02	1.47	6.94	0	27.56	34.33	35.89	57.17	104.95	0	2.8	23.24	44.34	91.38	2.8	8.11	8.04	21.86	5.74	10.89	10.04	87.07	82.32	66.01	77.67	49.1	148.15	88.92	33.17	37.75	41.96	31.05	51.08	11858	ENSMUSG00000001313	Rnd2	Rho family GTPase 2
Srr	13.24	15.03	13.75	19.75	10.88	15.17	34.66	24.72	11.04	28.99	18.29	21.41	2.6	0	44.98	0	2.32	14.25	9.14	11.18	24.61	15.35	25.5	18.78	13.79	34.81	32.34	9.5	18.86	18	24.97	28.06	4.68	15.08	13.95	11.36	13.66	44.34	27364	ENSMUSG00000001323	Srr	serine racemase
Sync	0	0	0	1.32	0	0	0	0	0	0	0	0.6	0	0	0	0	0	0	0	0	0.56	0.73	0	0	0	0	0	0	0	0	0	0	0	0	2.46	0	0	0	68828	ENSMUSG00000001333	Sync	syncoilin
Fndc5	0	0	0	26.99	2.72	17.34	0	0	0	0.36	0	1.51	0	0	0	0	0	0	0	0	0	0	3.64	2.09	2.9	0	0	0	0	0	0	0	7.02	26.14	20.51	8.74	11.18	4.49	384061	ENSMUSG00000001334	Fndc5	fibronectin type III domain containing 5
Acp5	39.71	17.53	10.43	2995.58	5837.92	6044.9	4836.13	5546.55	3672.59	1161.58	1771.33	1545.05	18.19	0	1751.08	1277.43	748.4	1401.43	992.98	0	3.08	0	0	16.7	10.16	7.36	19.9	104.49	122.59	136.09	92.37	75.2	301.86	320.19	183.81	199.29	262.09	104.4	11433	ENSMUSG00000001348	Acp5	acid phosphatase 5/ tartrate resistant
Cnn1	0	0	0	6.58	23.57	3.25	0	0	0	0	0	0	0	0	0	0	0	7.92	0	0	0	0	0	0	0	0	0	0	0	0	0	0	0	4.02	0	0	18.63	0	12797	ENSMUSG00000001349	Cnn1	calponin 1
Fbxo9	63.97	65.13	51.19	75.04	110.58	55.27	77.43	114.05	122.49	108.1	111.65	88.06	103.95	200.76	25.7	67.23	69.73	114.02	97.47	95.06	93.95	76.73	60.11	73.57	134.26	88.37	134.33	91.82	75.44	75.78	54.09	89.79	84.24	47.75	83.7	78.67	27.33	63.43	71538	ENSMUSG00000001366	Fbxo9	f-box protein 9
Vps50	51.84	103.33	43.14	76.35	89.73	17.34	53.83	51.61	67.27	46.18	47.8	43.73	0	91.26	51.41	103.65	95.29	49.09	3.05	13.98	41.38	46.77	54.64	61.57	80.55	55.57	59.7	0	40.55	54.94	38.28	37.04	32.76	36.69	39.39	33.21	42.23	60.34	73288	ENSMUSG00000001376	Vps50	VPS50 EARP/GARPII complex subunit
NA	70.04	65.13	95.75	59.24	57.1	131.13	81.12	113.19	46.18	45.46	34.97	42.52	72.76	91.26	122.09	61.63	4.65	61.76	82.24	41.94	61.8	52.62	63.75	69.92	151.68	139.92	57.21	28.5	44.32	47.36	64.08	26.94	128.7	45.24	44.31	21.85	55.9	35.92	NA	ENSMUSG00000001379	NA	NA
Hars	191.36	107.09	108.55	122.43	85.2	125.71	118.73	118.39	121.48	192.22	164.27	196.64	135.13	150.57	122.09	131.66	125.51	133.02	94.42	125.82	130.3	105.96	85.6	106.97	121.2	110.46	174.13	186.81	97.13	87.46	87.38	67.34	117	120.64	153.45	129.36	88.19	132.75	15115	ENSMUSG00000001380	Hars	histidyl-tRNA synthetase
Zmat2	172.61	125.88	171.12	159.95	159.52	202.65	144.54	154.38	143.57	205.47	209.51	173.11	239.08	41.07	237.76	260.53	302.15	126.68	167.53	162.16	127.23	130.08	81.96	142.45	106.68	101.76	241.3	341.95	143.33	155.35	236.34	200.9	180.18	165.37	183.81	179.19	181.35	187.19	66492	ENSMUSG00000001383	Zmat2	zinc finger/ matrin type 2
Ube2c	122.98	25.68	56.88	100.05	74.32	141.97	53.83	82.4	100.4	79.47	75.4	51.27	57.17	460.85	83.54	11.21	83.67	101.35	48.74	0	14.26	10.96	5.46	3.65	0.73	0.67	0	6.33	33	46.73	24.97	97.64	112.32	67.35	49.24	95.27	115.52	84.76	68612	ENSMUSG00000001403	Ube2c	ubiquitin-conjugating enzyme E2C
Smg5	97.06	95.82	64.94	142.18	124.17	118.12	97.34	97.14	75.3	140.32	177.1	274.75	49.38	31.94	93.18	14.01	23.24	112.43	70.06	206.9	164.98	179.04	251.35	182.62	88.54	114.48	49.75	66.49	102.78	78.31	103.19	124.58	67.86	106.56	110.78	79.54	130.42	52.2	229512	ENSMUSG00000001415	Smg5	Smg-5 homolog/ nonsense mediated mRNA decay factor (C, elegans)
Cct3	440.08	311.87	362.15	393.62	405.15	378.21	336.27	266.27	217.87	443.51	463.93	557.04	246.88	136.88	282.74	271.73	232.42	242.28	85.29	173.35	256.69	376.35	329.67	363.16	341.09	415.07	340.8	113.98	347.96	220.08	179.75	133.56	348.67	303.1	267.51	321.66	337.86	281.21	12462	ENSMUSG00000001416	Cct3	chaperonin containing Tcp1/ subunit 3 (gamma)
NA	20.4	5.01	6.64	12.51	4.53	0	0	3.47	0	0	0	0	0	0	0	0	0	0	0	0	0	0	0	0	0	0	0	0	0	0	0	0	0	0	0	0	0	0	NA	ENSMUSG00000001417	NA	NA
Glmp	490.27	391.4	429.46	853.72	1068.61	966.66	844.37	1128.83	813.23	1005.15	1472.31	1336.95	589.91	255.52	941.4	804	550.84	1122.73	1398.09	1073.64	864.31	1292.75	1092.83	960.08	1135.02	1284.03	592.05	690.24	1273.95	1279.41	1214.17	1351.3	1474.22	934.42	712.27	1048.01	1085.63	912.38	56700	ENSMUSG00000001418	Glmp	glycosylated lysosomal membrane protein
Mef2d	658.47	615.6	637.08	376.5	449.56	618.79	257.37	354.3	297.18	344.36	246.4	291.94	236.48	360.46	607.25	299.75	169.67	490.9	453.85	290.78	400.14	377.08	380.67	408.04	809.18	657.41	134.33	231.14	376.25	258.28	372.82	288.44	348.67	236.75	189.56	174.81	196.26	194.77	17261	ENSMUSG00000001419	Mef2d	myocyte enhancer factor 2D
Tmem79	42.46	16.91	13.75	17.11	7.25	34.68	3.69	3.47	0	2.15	7.06	6.03	5.2	0	0	0	0	0	0	2.8	1.68	0	12.75	0.52	0	0	0	0	0	0	0	0	0	2.01	0	0	0	5.61	71913	ENSMUSG00000001420	Tmem79	transmembrane protein 79
Snd1	205.15	155.31	215.21	150.73	302.73	244.92	226.39	179.1	177.71	251.29	289.39	308.23	155.92	187.08	436.97	36.42	330.04	134.6	228.45	44.74	64.59	92.08	107.46	125.23	84.91	114.48	196.52	275.46	258.37	148.09	110.68	178.45	210.6	67.35	103.39	106.64	91.92	125.45	56463	ENSMUSG00000001424	Snd1	staphylococcal nuclease and tudor domain containing 1
Col18a1	16.54	6.26	5.21	12.51	18.13	10.84	1.47	0	0	0.36	1.28	0.3	0	0	0	0	0	0	0	0	0.28	0.73	0	0	0	0	0	0	0	3.16	0	0	0	4.02	0	0	1.24	1.12	12822	ENSMUSG00000001435	Col18a1	collagen/ type XVIII/ alpha 1
Slc19a1	25.37	7.51	19.43	23.04	57.1	40.1	28.76	58.54	20.08	23.63	19.25	26.84	10.39	0	32.13	5.6	2.32	17.42	9.14	83.88	53.69	57.73	45.53	54.27	146.6	149.29	0	12.66	38.66	49.57	29.13	46.02	60.84	30.66	32.82	26.22	22.36	10.38	20509	ENSMUSG00000001436	Slc19a1	solute carrier family 19 (folate transporter)/ member 1
Kpnb1	154.42	259.89	181.08	335.04	299.1	202.65	365.03	374.25	354.41	320.73	256.03	281.99	228.69	123.2	417.69	308.15	416.04	259.7	188.85	324.33	442.36	292.31	311.46	333.42	324.4	317.99	89.55	142.48	124.47	204.92	109.02	166.11	386.11	273.44	314.29	263.97	283.21	477.38	16211	ENSMUSG00000001440	Kpnb1	karyopherin (importin) beta 1
Npepps	327.58	211.67	267.82	302.12	237.47	283.93	189.52	236.78	296.18	346.15	296.45	468.37	207.9	168.82	157.44	383.79	274.26	343.63	207.12	287.98	373.02	195.85	207.64	267.68	286.66	232.3	380.6	335.62	301.75	209.03	242.17	206.51	215.28	310.13	235.51	233.38	285.69	299.73	19155	ENSMUSG00000001441	Npepps	aminopeptidase puromycin sensitive
Tbx21	2.21	0	0.95	5.92	0	0	0	2.17	0	1.07	3.85	3.02	0	0	0	0	0	0	0	0	0.28	0	1.82	0.52	1.45	0	0	0	0	0	0	0	0	4.52	7.39	0	6.21	1.12	57765	ENSMUSG00000001444	Tbx21	T-box 21
Mrpl10	150.55	137.77	143.63	181.67	156.8	176.64	194.68	156.55	217.87	167.17	196.03	217.75	88.36	260.08	22.49	81.24	60.43	121.93	207.12	173.35	184.83	141.77	136.6	210.8	227.15	210.88	82.09	126.65	109.38	103.25	91.54	74.07	109.98	109.07	92.73	81.29	88.19	108.05	107732	ENSMUSG00000001445	Mrpl10	mitochondrial ribosomal protein L10
Cyp51	347.43	377.63	305.27	101.37	72.51	145.22	51.62	40.33	85.34	245.92	306.4	375.48	265.07	136.88	32.13	61.63	160.37	71.26	45.69	22.37	23.21	21.19	18.21	17.74	22.5	26.11	0	63.32	45.26	25.26	39.11	35.91	30.42	50.26	32.82	20.98	26.08	42.1	13121	ENSMUSG00000001467	Cyp51	cytochrome P450/ family 51
Tcf25	1358.3	1503.62	1689.41	1147.28	892.77	950.41	1340.67	1134.03	934.71	1366.69	1381.83	1599.64	1065.47	1738.44	1876.38	1389.48	1150.49	1517.03	1757.51	2390.53	2179.65	1469.6	1515.39	1386.38	864.33	899.09	1733.86	1370.98	1330.53	1077.33	1627.77	1121.22	968.77	1219.43	1315.4	1142.41	1335.3	730.24	66855	ENSMUSG00000001472	Tcf25	transcription factor 25 (basic helix-loop-helix)
Tubb6	34.19	3.13	22.75	429.16	414.21	328.36	101.03	128.36	118.47	272.05	403.61	576.04	244.28	219.02	266.68	92.45	225.45	304.04	499.54	67.1	34.39	46.04	25.5	43.31	22.5	46.86	186.57	373.62	504.49	834.52	523.45	840.63	613.09	275.95	266.69	462.38	320.47	331.16	67951	ENSMUSG00000001473	Tubb6	tubulin/ beta 6 class V
Def8	69.49	25.68	50.25	56.61	114.2	174.48	47.2	44.67	35.14	262.74	181.59	193.02	291.06	0	25.7	22.41	88.32	23.75	6.09	19.57	35.51	32.15	18.21	57.92	41.37	89.71	0	3.17	30.18	51.15	113.18	53.87	126.36	31.67	27.9	26.22	31.05	60.06	23854	ENSMUSG00000001482	Def8	differentially expressed in FDCP 8
Meox1	0	0	0	5.92	2.72	4.33	0	0	0	2.15	0.64	0.3	0	0	0	0	0	0	6.09	0	0	1.46	0	0	0	0.67	0	0	0	0	0	0	9.36	0.5	1.64	0	3.73	1.4	17285	ENSMUSG00000001493	Meox1	mesenchyme homeobox 1
Sost	0	0	0	0	0	0	0	0	0	0.72	0	1.21	0	0	0	0	0	0	0	0	0.84	0	0	0	0	0	0	0	0	0	0	0	0	0	0.82	0	0	1.96	74499	ENSMUSG00000001494	Sost	sclerostin
Pax9	0	0	0	0	0	0	0	0	0	0	0	0	0	0	9.64	0	0	0	0	0	0	0	0	0	0	0	4.98	3.17	0	0	0	0	0	0	0	0	0	0.28	18511	ENSMUSG00000001497	Pax9	paired box 9
Irx2	8.82	4.38	2.37	0	0	0	0	0	0	0	0	0	0	0	0	0	0	0	0	0	0	0	0	0	0	0	0	0	0	0	0	0	0	0	0	0	0	0	16372	ENSMUSG00000001504	Irx2	Iroquois homeobox 2
Col1a1	1.65	0	14.22	46.73	91.54	34.68	2.21	2.6	1	1.07	0	0.6	0	0	0	0	0	0	0	2.8	0	0	0	0	0	0.67	0	22.16	1.89	4.42	9.99	0	14.04	4.02	8.21	9.61	28.57	53.04	12842	ENSMUSG00000001506	Col1a1	collagen/ type I/ alpha 1
Itga3	27.02	11.9	2.37	67.14	19.03	34.68	0	0	0	0	0	2.11	0	0	0	0	41.84	0	3.05	0	0	0	0	0	0	0	0	0	0	0	0	0	0	0	0	0	0	0.84	16400	ENSMUSG00000001507	Itga3	integrin alpha 3
Sgca	0	0	0	0	0	0	4.42	0	0	0	0	0	0	0	0	0	0	0	0	0	0.56	0	0	0.52	0	0	0	0	1.89	0	0	0	0	2.01	4.1	7.87	7.45	3.65	20391	ENSMUSG00000001508	Sgca	sarcoglycan/ alpha (dystrophin-associated glycoprotein)
Dlx3	0.55	0	0	0	0	0	0	0	0	0	0	0	0	0	0	0	0	0	0	0	0	0	0	0	0	0	0	0	0	0	0	0	2.34	0	0	0	0	0	13393	ENSMUSG00000001510	Dlx3	distal-less homeobox 3
Foxm1	38.05	10.65	13.75	13.16	4.53	45.52	5.16	6.07	0	29.35	16.36	15.98	0	0	28.92	22.41	0	6.33	12.18	13.98	15.1	17.54	7.29	7.83	15.24	18.08	0	31.66	1.89	5.68	0.83	4.49	7.02	18.1	11.49	21.85	22.36	30.03	14235	ENSMUSG00000001517	Foxm1	forkhead box M1
Itfg2	28.68	16.91	10.43	40.15	44.41	31.43	67.11	41.2	28.11	35.44	40.43	38.91	31.18	0	38.56	2.8	30.21	17.42	0	67.1	47.82	43.12	43.71	59.48	23.95	48.2	0	0	23.57	29.36	9.15	48.26	35.1	33.17	20.51	18.36	22.36	14.87	101142	ENSMUSG00000001518	Itfg2	integrin alpha FG-GAP repeat containing 2
Nrip2	0	0	0	0	0	1.08	0	0	0	0	0	0	0	0	0	0	0	0	0	0	0	0.73	0	0	0	0	0	0	0	0	0	0	0	6.53	0	0	2.48	0.28	60345	ENSMUSG00000001520	Nrip2	nuclear receptor interacting protein 2
Tulp3	3.31	3.13	0	9.22	0	1.08	0	2.6	0	3.94	2.25	0.6	12.99	0	0	2.8	0	6.33	0	61.51	11.18	25.58	23.68	17.22	18.87	20.75	34.83	0	0	5.68	19.14	4.49	9.36	3.02	2.46	2.62	3.73	7.86	22158	ENSMUSG00000001521	Tulp3	tubby-like protein 3
Gtf2h4	49.08	58.87	104.28	57.92	56.19	66.11	72.27	55.94	26.1	46.53	72.19	72.38	41.58	86.69	6.43	33.62	72.05	74.43	85.29	64.31	74.66	82.58	145.71	102.27	69.67	105.77	0	47.49	55.64	90.3	48.27	83.05	51.48	65.34	68.11	99.64	108.07	63.15	14885	ENSMUSG00000001524	Gtf2h4	general transcription factor II H/ polypeptide 4
Tubb5	1504.44	1153.54	1602.19	749.06	815.73	907.06	362.08	356.04	249.99	966.13	1251.26	794.09	1249.98	552.1	1179.17	958.07	785.59	1263.67	1873.26	561.98	709.4	1088.14	1098.29	884.95	1156.8	1009.55	619.41	1063.86	1017.47	1245	1274.92	1329.97	2059.23	852.99	1024.09	1024.41	916.7	1056.92	22154	ENSMUSG00000001525	Tubb5	tubulin/ beta 5 class I
Ell2	305.52	366.35	538.96	41.47	87.01	111.62	25.07	41.2	47.19	172.18	265.01	353.46	15.59	0	167.08	64.43	55.78	174.19	97.47	22.37	17.34	19	16.39	15.13	13.06	24.1	17.41	9.5	14.14	33.47	11.65	51.63	39.78	27.14	16.41	24.47	8.69	28.91	192657	ENSMUSG00000001542	Ell2	elongation factor RNA polymerase II 2
Jup	483.1	220.44	206.67	186.28	90.64	137.63	1187.28	691.26	542.15	331.11	306.72	300.69	410.6	282.9	446.6	78.44	199.88	91.85	188.85	209.7	267.6	184.16	183.96	228.02	59.51	204.19	323.39	246.97	402.65	525.09	389.47	447.81	318.24	229.21	220.74	352.25	199.98	285.42	16480	ENSMUSG00000001552	Jup	junction plakoglobin
Fkbp10	0	1.88	1.9	5.92	12.69	0	0.74	0	0	1.07	0.32	0.3	0	0	0	0	0	0	0	0	0.84	0	0	3.13	0	0.67	0	0	0	0	0	0	0	3.52	5.74	0	8.69	2.25	14230	ENSMUSG00000001555	Fkbp10	FK506 binding protein 10
Klhl10	1.1	1.88	0	0	0	0	2.95	0	0	0	0	0.3	0	0	0	0	0	0	0	0	1.12	0.73	0	0	2.18	0	0	0	0	1.26	0	0	0	0	0.82	0	0	1.68	66720	ENSMUSG00000001558	Klhl10	kelch-like 10
Mnx1	0	0	0	1.32	0	0	0	0	0	0	0	0	0	0	0	0	0	0	0	0	0	0	0	0	0	0	0	0	0	0	0	0	0	0	0	0	0	0	15285	ENSMUSG00000001566	Mnx1	motor neuron and pancreas homeobox 1
Nom1	67.83	113.98	82.01	57.92	75.23	84.53	88.49	71.12	64.26	70.88	51.33	63.94	135.13	164.26	38.56	109.25	104.59	66.51	30.46	58.71	92.28	67.23	96.53	75.66	60.96	60.25	243.79	22.16	72.61	93.15	14.98	26.94	42.12	80.42	72.21	89.16	63.35	47.99	433864	ENSMUSG00000001569	Nom1	nucleolar protein with MIF4G domain 1
Ergic1	105.33	80.79	109.97	226.43	167.68	226.49	176.99	147.88	171.68	222.65	312.17	277.16	96.15	95.82	32.13	86.84	92.97	83.93	115.75	44.74	115.2	147.62	198.53	216.02	207.56	288.54	176.62	120.32	159.36	129.14	109.85	97.64	187.2	91.48	144.42	118	69.56	171.19	67458	ENSMUSG00000001576	Ergic1	endoplasmic reticulum-golgi intermediate compartment (ERGIC) 1
Tnk1	12.68	5.01	0.47	43.44	1.81	22.76	0	0.43	0	0	0	0	0	0	0	0	0	0	0	0	0	0	0	1.04	0	0	0	0	1.89	0	0	0	0	0	0	5.24	0	0	83813	ENSMUSG00000001583	Tnk1	tyrosine kinase/ non-receptor/ 1
Acap1	463.8	583.03	467.86	12.51	9.06	9.75	7.37	13.01	15.06	40.45	67.38	43.13	782.21	748.3	0	47.62	51.13	12.67	76.15	0	0	0	0	0	0.73	6.69	0	0	0.94	0.32	0	3.37	4.68	57.8	27.08	14.86	9.94	3.65	216859	ENSMUSG00000001588	Acap1	ArfGAP with coiled-coil/ ankyrin repeat and PH domains 1
Tcea3	1592.68	1187.36	1494.58	161.92	38.07	162.56	0	1.73	7.03	5.37	6.42	5.73	20.79	0	25.7	53.23	18.59	14.25	112.7	0	2.24	2.19	0	1.57	2.18	8.7	44.78	0	10.37	3.47	0	2.24	70.2	55.79	32.82	12.24	26.08	30.59	21401	ENSMUSG00000001604	Tcea3	transcription elongation factor A (SII)/ 3
Csn3	0	0	0	1.32	0	4.33	0	0	0	0	0	0	0	0	0	0	0	0	0	0	0	0	0	0.52	0.73	0	0	0	0	0	0	0	0	0	2.46	0	0	0	12994	ENSMUSG00000001622	Csn3	casein kappa
Ifrd1	3049.7	3287.79	3654.69	546.98	357.11	514.76	123.15	124.46	122.49	1442.57	1090.52	1287.79	171.52	118.63	613.68	722.76	859.96	954.88	654.88	58.71	79.41	82.58	69.21	106.97	105.95	121.17	208.96	231.14	330.04	864.2	754.8	738.5	589.69	745.93	394.7	487.73	488.16	472.33	15982	ENSMUSG00000001627	Ifrd1	interferon-related developmental regulator 1
Stk38l	274.64	145.29	246.49	74.38	76.13	63.94	28.76	15.18	22.09	32.57	41.07	45.54	46.78	0	28.92	81.24	46.48	11.08	24.37	19.57	13.98	19	16.39	26.09	18.87	15.4	0	0	8.49	12.31	3.33	15.71	25.74	13.57	13.13	3.5	1.24	33.4	232533	ENSMUSG00000001630	Stk38l	serine/threonine kinase 38 like
Brpf1	271.88	320.64	307.16	215.24	216.62	275.26	211.65	264.1	299.19	329.68	251.21	405.04	207.9	511.04	263.46	243.72	185.94	300.87	609.19	458.53	595.87	304.74	326.03	386.12	319.32	307.95	343.29	126.65	234.8	329.01	371.99	294.05	264.42	239.26	234.69	223.76	181.35	198.42	78783	ENSMUSG00000001632	Brpf1	bromodomain and PHD finger containing/ 1
Akr1b3	9.38	11.9	16.59	9.87	9.97	15.17	14.75	16.05	22.09	16.47	21.5	13.87	129.94	50.19	173.5	44.82	106.91	49.09	103.56	27.96	24.89	13.15	21.86	13.57	20.32	18.08	283.59	354.62	90.53	115.88	161.45	108.87	70.2	35.19	31.18	36.71	49.69	18.24	11677	ENSMUSG00000001642	Akr1b3	aldo-keto reductase family 1/ member B3 (aldose reductase)
Hoxc8	0	0	0	0	0	0	0	0	0	0	0	0	0	0	0	0	0	0	0	0	0	0	0	0	0	0	0	0	0	0	0	0	0	0.5	0	0	0	0	15426	ENSMUSG00000001657	Hoxc8	homeobox C8
Gstt1	0	0	0.47	40.15	8.16	47.68	12.54	12.58	11.04	0	1.93	0.3	0	0	0	0	0	1.58	0	0	0.84	0	1.82	1.57	2.18	0.67	0	34.83	35.83	53.68	29.96	7.86	0	16.08	5.74	19.23	13.66	8.42	14871	ENSMUSG00000001663	Gstt1	glutathione S-transferase/ theta 1
Gstt3	77.21	51.98	96.7	92.81	56.19	145.22	38.35	24.72	35.14	88.06	121.6	93.79	57.17	22.81	22.49	28.01	58.11	34.84	158.39	8.39	7.55	23.39	9.11	24	30.48	41.51	9.95	79.16	35.83	81.78	103.19	122.34	119.34	25.64	11.49	23.6	14.91	56.41	103140	ENSMUSG00000001665	Gstt3	glutathione S-transferase/ theta 3
Ddt	316.55	239.23	449.37	200.76	189.43	354.37	266.22	252.83	290.15	158.22	196.67	142.95	376.81	232.7	334.15	263.33	181.29	370.55	444.71	97.86	84.45	132.27	154.82	115.31	254.73	151.3	228.86	405.28	254.6	194.19	254.65	369.25	386.11	135.21	155.09	178.31	177.63	187.47	13202	ENSMUSG00000001666	Ddt	D-dopachrome tautomerase
Tat	0	0	0	2.63	0	7.59	0	0	0	0	0	0	0	0	0	0	0	0	0	0	0	0	0	0	0	0	0	0	0	0	0	0	0	0	0	0	0	0	234724	ENSMUSG00000001670	Tat	tyrosine aminotransferase
Marveld3	8.27	0	0	23.04	15.41	15.17	0	0	0	0.36	0	0	0	0	0	0	0	0	0	0	0	0	0	0	0	0.67	0	0	0	0	0	0	0	0	0	0	0	0	73608	ENSMUSG00000001672	Marveld3	MARVEL (membrane-associating) domain containing 3
Ddx18	42.46	28.81	46.93	39.49	41.69	37.93	47.2	87.17	39.16	45.82	48.77	49.76	18.19	73.01	25.7	84.04	74.38	38.01	6.09	95.06	93.67	65.04	72.86	57.4	84.18	46.19	121.89	107.65	82.04	22.1	42.44	31.43	56.16	56.3	43.49	67.3	57.14	55.57	66942	ENSMUSG00000001674	Ddx18	DEAD (Asp-Glu-Ala-Asp) box polypeptide 18
Ubl3	3254.3	2642.13	3496.37	1124.25	1031.45	1147.64	553.08	626.64	817.25	734.89	626.91	941.57	995.31	698.11	542.99	484.64	425.33	484.56	456.89	539.62	610.97	648.93	601.05	465.43	752.57	725.03	363.19	503.43	211.23	450.89	422.75	496.07	383.77	475	437.37	365.36	419.84	466.15	24109	ENSMUSG00000001687	Ubl3	ubiquitin-like 3
Gramd3	306.62	325.65	334.66	35.54	7.25	44.43	39.08	41.2	82.33	9.66	19.57	8.75	80.56	100.38	0	5.6	4.65	19	18.28	13.98	2.24	0	0	5.22	12.34	4.02	171.64	31.66	153.7	106.09	104.02	130.19	112.32	49.76	92.73	129.36	101.86	141.17	107022	ENSMUSG00000001700	Gramd3	GRAM domain containing 3
Eef1e1	83.83	36.95	61.62	51.34	58.01	43.35	30.24	57.24	73.29	66.94	88.55	87.46	54.57	250.96	54.62	8.4	27.89	53.84	36.55	22.37	43.06	28.5	34.61	53.22	59.51	70.29	2.49	79.16	16.03	42.63	12.48	35.91	49.14	17.09	22.16	43.7	32.3	40.97	66143	ENSMUSG00000001707	Eef1e1	eukaryotic translation elongation factor 1 epsilon 1
Akt1	1918.06	1449.76	1793.69	889.26	751.38	1046.86	1366.48	1042.96	1106.39	1259.3	1430.28	2011.61	2429.8	2149.09	2943.09	1221.4	1071.47	834.53	1279.3	1065.25	1033.48	958.79	1205.75	942.87	1122.69	1534.4	1806	3622.18	1097.62	1032.18	1025.26	1217.74	1298.72	862.04	926.44	969.35	898.07	1365.35	11651	ENSMUSG00000001729	Akt1	thymoma viral proto-oncogene 1
Cldn15	0	0	0	165.87	38.07	137.63	0	0	5.02	4.65	4.81	5.13	0	0	0	0	0	0	0	0	0	0	0	0	0	0	0	0	0	0	4.16	0	0	0	2.46	0	1.24	0.56	60363	ENSMUSG00000001739	Cldn15	claudin 15
Il16	6.07	35.07	3.79	367.29	577.36	444.32	1225.63	1621.9	1398.55	199.74	248.01	151.1	189.71	164.26	498.01	361.38	99.94	384.8	335.05	721.35	586.65	751.98	868.8	717.98	1219.21	1240.51	517.42	503.43	488.46	415.84	568.39	436.59	437.59	466.46	556.36	349.63	417.36	359.79	16170	ENSMUSG00000001741	Il16	interleukin 16
Tcirg1	6.07	32.56	8.53	1344.75	1527.23	1146.56	2275.74	1413.31	1291.13	792.52	1218.21	861.04	106.55	73.01	1747.86	1050.52	1057.52	1450.52	2948.48	2709.26	1677.73	2797.44	2803.1	2690.84	1391.2	2212.57	325.88	664.91	754.38	696.54	1063.54	918.07	463.33	821.33	905.11	728.1	824.78	383.64	27060	ENSMUSG00000001750	Tcirg1	T cell/ immune regulator 1/ ATPase/ H+ transporting/ lysosomal V0 protein A3
Naglu	55.7	46.34	30.81	185.62	112.39	131.13	339.96	210.76	229.91	183.27	248.97	236.75	96.15	4.56	318.09	123.26	155.72	125.1	386.84	698.98	645.65	576.59	730.37	681.97	272.14	447.2	44.78	164.64	382.85	195.76	337.87	208.76	140.4	203.07	160.01	210.65	221.1	129.1	27419	ENSMUSG00000001751	Naglu	alpha-N-acetylglucosaminidase (Sanfilippo disease IIIB)
Coasy	95.41	100.83	68.26	62.53	105.14	95.37	96.6	107.98	65.26	50.11	60.32	60.32	85.76	155.14	54.62	67.23	51.13	118.77	51.78	123.02	113.53	115.46	103.82	168.54	212.64	179.42	32.34	0	92.41	73.57	95.7	145.9	16.38	63.84	68.93	96.15	72.04	71.85	71743	ENSMUSG00000001755	Coasy	Coenzyme A synthase
Smo	0	3.76	7.58	27.65	39.88	40.1	8.85	3.04	1	0	0	0	0	0	67.47	0	18.59	19	6.09	69.9	106.54	65.77	92.89	74.62	92.17	117.16	12.44	0	7.54	5.68	9.15	0	21.06	47.75	40.21	16.61	36.02	49.39	319757	ENSMUSG00000001761	Smo	smoothened/ frizzled class receptor
Tspan33	77.76	57.61	47.88	165.87	142.3	277.43	97.34	65.48	27.11	2.51	1.6	3.92	132.53	41.07	748.63	114.86	343.98	177.36	97.47	229.27	262.84	86.23	138.42	176.89	210.46	142.6	0	0	5.66	12	0	8.98	63.18	64.34	66.47	22.73	23.6	20.21	232670	ENSMUSG00000001763	Tspan33	tetraspanin 33
Crnkl1	63.97	36.32	75.84	60.56	51.66	29.26	74.48	74.59	68.27	83.4	55.5	57.91	38.98	232.7	86.75	8.4	60.43	44.34	0	67.1	90.88	56.27	38.25	61.57	70.39	35.48	87.07	47.49	84.87	26.84	72.4	65.1	7.02	77.41	79.6	100.52	89.43	53.32	66877	ENSMUSG00000001767	Crnkl1	crooked neck pre-mRNA splicing factor 1
Rin2	66.18	109.59	88.64	317.26	245.63	332.7	106.93	136.17	150.6	297.46	262.76	275.35	83.16	0	122.09	308.15	283.55	319.88	322.87	592.74	588.04	444.32	398.88	459.69	476.8	484.69	1271.17	47.49	610.1	566.77	661.59	593.72	276.12	444.84	597.39	517.45	585.05	768.13	74030	ENSMUSG00000001768	Rin2	Ras and Rab interactor 2
Folh1	0	0	0	0	0	0	0	0	0	0	0.32	0	0	0	0	0	0	0	0	0	0	0	0	0	0	0	0	0	0	0	0	0	0	0	0	0	0	0	53320	ENSMUSG00000001773	Folh1	folate hydrolase 1
Chordc1	9.38	77.65	20.86	94.13	71.6	27.09	78.91	106.68	117.47	55.48	118.39	41.62	200.1	0	25.7	106.45	79.02	120.35	18.28	100.65	55.37	69.42	83.78	69.92	97.25	171.38	67.17	98.15	50.92	94.41	125.66	99.89	39.78	100.03	89.44	63.81	80.74	132.18	66917	ENSMUSG00000001774	Chordc1	cysteine and histidine-rich domain (CHORD)-containing/ zinc-binding protein 1
Rtcb	202.39	164.08	157.85	414.02	569.2	387.97	182.89	186.48	165.66	278.49	275.6	316.07	171.52	223.58	1471.55	944.07	1115.63	1065.72	752.35	167.76	182.31	206.81	191.24	261.41	313.51	325.36	59.7	98.15	286.66	308.17	207.22	190.8	210.6	191.51	186.27	128.49	166.45	187.47	28088	ENSMUSG00000001783	Rtcb	RNA 2'/3'-cyclic phosphate and 5'-OH ligase
Pwp1	46.88	66.38	59.73	48.05	78.85	33.59	30.97	55.51	33.13	95.93	72.83	58.81	0	41.07	54.62	120.46	51.13	140.94	79.19	16.78	40.82	31.42	56.46	61.57	95.07	74.98	79.6	37.99	56.58	88.41	74.9	33.67	86.58	32.17	34.46	43.7	44.72	54.16	103136	ENSMUSG00000001785	Pwp1	PWP1 homolog/ endonuclein
Fbxo7	84.93	93.31	58.78	85.57	172.21	146.3	115.04	157.85	182.73	65.51	70.9	65.14	38.98	18.25	289.17	22.41	55.78	107.68	39.6	64.31	94.51	100.85	91.07	76.7	90.71	174.06	124.38	208.97	167.85	71.04	101.53	161.62	126.36	75.4	74.67	85.66	77.01	81.95	69754	ENSMUSG00000001786	Fbxo7	F-box protein 7
Capns1	1643.42	2047.82	1753.4	1641.61	1187.34	1202.91	1817.79	1024.75	894.55	2090.12	2183.6	2173.57	2876.78	2349.86	1805.7	2910.63	2865.76	1697.56	2732.22	942.23	735.96	1102.02	1158.4	954.87	492.76	663.44	3514.99	3976.8	2761.96	1867.02	2332.63	2111.12	1797.15	2436.84	2139.27	2610.86	2958.78	1780.7	12336	ENSMUSG00000001794	Capns1	calpain/ small subunit 1
Lrp3	0	0	0	1.32	0	0	0	0	0	0	0	0	0	0	0	0	0	3.17	0	0	0	0.73	10.93	0	0	0	0	0	8.49	7.58	3.33	17.96	0	0	0	2.62	0	0	435965	ENSMUSG00000001802	Lrp3	low density lipoprotein receptor-related protein 3
Evx2	0	0	0	0.66	0	0	0	0	0	0	0	0	0	0	0	0	0	0	0	0	0	0	0	0	0	0	0	0	0	0	0	0	0	0.5	0	0	0	0	14029	ENSMUSG00000001815	Evx2	even-skipped homeobox 2
Hoxd13	0	0	0	9.87	0	7.59	0	0	0	0	0	0	0	0	0	0	0	0	0	0	0	0	0	0	0	0	0	0	0	0	0	0	0	0	0	0	0	0	15433	ENSMUSG00000001819	Hoxd13	homeobox D13
Folr1	0	0	0	0	0	0	2.95	6.94	0	0	0	0	0	0	0	0	0	0	0	0	5.59	0.73	0	0	10.89	0	0	0	4.71	0	0	0	0	0	0	0	0	0	14275	ENSMUSG00000001827	Folr1	folate receptor 1 (adult)
Clpb	78.31	98.32	88.17	135.59	116.92	97.53	101.03	78.49	123.49	52.26	77.64	58.81	210.5	0	96.39	14.01	79.02	63.34	88.33	156.57	109.61	160.04	163.92	116.36	103.78	99.75	159.21	345.12	115.99	68.83	119	167.23	107.64	146.27	97.65	104.89	167.69	105.8	20480	ENSMUSG00000001829	Clpb	ClpB caseinolytic peptidase B
2007-09-01	71.14	160.95	73.95	132.3	118.73	52.02	112.09	150.05	109.43	200.81	162.02	119.73	197.5	159.7	151.01	190.49	153.4	234.36	94.42	178.94	142.61	149.08	123.85	115.84	111.03	135.23	196.52	6.33	56.58	247.55	220.53	224.47	166.14	239.76	319.21	298.93	350.28	399.92	235072	ENSMUSG00000001833	2007-09-01	septin 7
Zdhhc4	204.05	173.47	191.98	107.95	111.48	117.04	180.67	123.59	95.38	99.87	103.63	76.3	41.58	155.14	64.26	14.01	55.78	74.43	91.38	83.88	97.31	134.46	122.03	160.71	69.67	106.44	62.19	94.99	142.39	97.25	98.2	168.35	100.62	73.39	72.21	97.9	89.43	110.57	72881	ENSMUSG00000001844	Zdhhc4	zinc finger/ DHHC domain containing 4
Rac1	2700.61	2354.06	2853.6	1418.47	1560.77	1421.82	1058.96	1366.47	1726.86	2629.92	2285.95	2604.24	2351.84	1067.7	1169.53	1053.32	1301.56	1778.32	1257.98	472.51	793.29	1055.25	917.97	1194.89	1957.99	1971.56	450.26	1513.46	1190.03	1682.31	1294.89	1371.5	1638.03	787.15	927.27	870.58	832.24	1932.53	19353	ENSMUSG00000001847	Rac1	Rac family small GTPase 1
Nup214	105.33	125.88	217.1	92.15	151.36	101.87	126.1	195.58	122.49	112.4	140.85	164.37	62.37	104.95	93.18	92.45	183.61	148.85	57.87	181.74	142.33	154.2	182.14	142.45	201.02	206.19	72.14	189.97	152.76	171.14	152.29	68.46	58.5	88.47	121.45	79.54	115.52	66.51	227720	ENSMUSG00000001855	Nup214	nucleoporin 214
Aif1l	49.08	3.76	27.49	1.32	0	0	0	0	0	0	0	0	0	0	0	0	0	0	0	0	0	0	0	0	0	0	0	0	0	0	0	0	0	1.51	0	0	0	0	108897	ENSMUSG00000001864	Aif1l	allograft inflammatory factor 1-like
Cpa3	0	0	0	0	0	0	0	0	0	0	0	0	0	0	0	0	0	0	0	0	0	0	0	0	0	0	0	0	0	0	0	5.61	0	0	0	0	0	0	12873	ENSMUSG00000001865	Cpa3	carboxypeptidase A3/ mast cell
Ltbp1	0	0	0	0	0	0	0	0	0	0.72	0	0	0	0	0	0	0	0	0	0	0	0	0	0	0	0	0	0	0	0.32	0	1.12	0	0	0	0	0	0.56	268977	ENSMUSG00000001870	Ltbp1	latent transforming growth factor beta binding protein 1
Ugp2	115.81	221.69	101.44	121.77	103.33	52.02	251.47	253.26	111.44	261.31	235.49	125.16	145.53	114.07	96.39	112.06	181.29	216.95	3.05	226.47	159.66	132.27	131.14	106.44	80.55	102.43	64.68	6.33	42.43	161.35	108.18	94.28	107.64	191.51	157.55	189.67	203.71	194.49	216558	ENSMUSG00000001891	Ugp2	UDP-glucose pyrophosphorylase 2
Kcnh6	0	0	0	1.32	0.91	0	0	0	0	0	0	0	0	0	0	0	0	0	0	0	1.4	0	0	0	2.18	2.01	0	0	0	0	0	0	0	0	0.82	0.87	0	0	192775	ENSMUSG00000001901	Kcnh6	potassium voltage-gated channel/ subfamily H (eag-related)/ member 6
Trmt1	158.83	146.54	170.17	265.92	149.55	152.8	375.36	272.77	225.9	175.04	256.99	243.99	142.93	91.26	552.63	252.12	283.55	327.79	338.1	391.43	378.33	399.74	411.63	417.43	288.11	273.81	972.65	839.05	753.43	569.93	932.06	892.26	236.34	274.45	247	411.69	313.02	274.19	212528	ENSMUSG00000001909	Trmt1	tRNA methyltransferase 1
Nacc1	27.57	59.49	50.72	92.81	57.1	49.85	70.06	37.73	44.18	50.11	50.05	90.48	153.32	86.69	276.32	72.84	204.53	140.94	201.03	106.25	82.49	69.42	72.86	81.4	67.49	43.51	288.56	402.11	183.88	101.04	79.06	66.22	84.24	161.35	121.45	149.47	134.15	56.13	66830	ENSMUSG00000001910	Nacc1	nucleus accumbens associated 1/ BEN and BTB (POZ) domain containing
Nfix	72.24	5.64	33.66	163.9	113.3	131.13	81.12	85.87	93.37	404.14	204.37	314.26	140.33	45.63	533.36	551.87	543.87	475.06	216.26	945.03	623.28	584.63	641.12	378.82	216.99	178.08	557.22	408.44	169.73	323.33	376.15	323.23	156.78	219.15	215.81	288.44	258.37	221.43	18032	ENSMUSG00000001911	Nfix	nuclear factor I/X
Slc1a5	254.78	171.59	255.02	254.73	276.44	224.33	24.34	55.08	23.09	241.62	242.87	284.4	317.04	351.34	382.35	145.67	151.07	307.21	231.49	27.96	12.86	13.15	14.57	13.04	27.58	26.11	2.49	82.32	78.27	137.98	149.79	219.98	231.66	113.6	138.68	104.01	78.25	99.35	20514	ENSMUSG00000001918	Slc1a5	solute carrier family 1 (neutral amino acid transporter)/ member 5
Uba1	709.76	869.23	663.15	1084.75	1008.79	765.09	915.9	744.6	790.14	1026.27	875.88	882.45	951.13	812.18	1580.79	1070.13	1308.54	616	959.47	575.96	673.61	628.47	684.84	785.29	492.04	541.59	1641.82	1969.4	776.07	441.42	837.19	763.19	711.37	1044.5	871.47	1018.3	939.06	1013.42	22201	ENSMUSG00000001924	Uba1	ubiquitin-like modifier activating enzyme 1
Vwf	156.62	170.97	169.7	68.46	33.54	93.2	246.31	393.33	302.2	236.97	122.56	184.27	124.74	18.25	0	2.8	0	0	0	0	3.08	3.65	5.46	9.91	0	6.03	12.44	0	28.29	15.79	40.78	12.35	32.76	53.28	30.36	54.19	43.47	17.4	22371	ENSMUSG00000001930	Vwf	Von Willebrand factor
Siae	40.81	28.18	22.75	53.97	72.51	61.77	84.81	108.42	88.35	71.59	67.05	59.11	70.17	50.19	35.34	81.24	106.91	44.34	12.18	97.86	86.4	94.27	102	73.57	92.89	89.71	67.17	12.66	66.01	72.31	58.25	67.34	18.72	100.53	91.09	81.29	110.55	101.31	22619	ENSMUSG00000001942	Siae	sialic acid acetylesterase
Vsig2	0	1.88	0	11.85	6.34	17.34	5.9	3.9	0	0	0	0	0	0	0	0	0	0	0	0	0	0	0	0	0	0	0	0	0	0	0	0	0	0	0	0	2.48	0	57276	ENSMUSG00000001943	Vsig2	V-set and immunoglobulin domain containing 2
Esam	0	5.01	0.47	9.87	3.63	8.67	53.1	45.53	30.12	3.94	0	2.71	0	31.94	0	5.6	48.81	0	0	0	0	0.73	0	0	0	0	0	0	0	2.53	0	0	0	0.5	1.64	0	1.24	1.12	69524	ENSMUSG00000001946	Esam	endothelial cell-specific adhesion molecule
Spa17	29.78	39.45	27.02	7.9	6.34	3.25	6.64	3.9	6.02	6.44	3.85	5.73	54.57	0	0	30.82	0	49.09	27.41	16.78	4.19	2.19	0	3.65	0	0	34.83	158.31	2.83	43.57	20.8	0	2.34	29.66	9.85	20.1	26.08	14.59	20686	ENSMUSG00000001948	Spa17	sperm autoantigenic protein 17
Fam50a	402.03	296.84	450.79	360.71	329.01	308.86	339.96	376.85	406.61	346.86	564.99	436.4	252.08	962.76	629.74	591.09	518.3	589.08	405.11	450.15	402.66	274.77	244.06	354.81	372.29	299.25	644.29	538.26	379.07	510.88	400.28	314.26	493.75	419.21	457.07	465.88	445.93	296.08	108160	ENSMUSG00000001962	Fam50a	family with sequence similarity 50/ member A
Emd	1529.81	1355.2	1960.55	338.33	248.34	319.69	153.39	118.39	144.57	373.35	424.46	530.8	62.37	346.77	83.54	207.3	158.05	80.76	100.52	125.82	149.32	146.89	194.89	198.28	84.91	153.98	213.93	142.48	150.88	82.73	70.74	136.93	217.62	104.05	118.99	93.53	111.79	185.23	13726	ENSMUSG00000001964	Emd	emerin
Taco1	4.41	3.76	4.74	12.51	5.44	4.33	2.21	6.94	1	6.09	7.06	12.37	0	0	0	0	6.97	20.59	0	27.96	13.7	14.62	5.46	2.09	10.89	8.03	0	22.16	6.6	13.26	4.99	16.84	2.34	2.51	7.39	2.62	4.97	7.3	70207	ENSMUSG00000001983	Taco1	translational activator of mitochondrially encoded cytochrome c oxidase I
Grik3	0	0	0	0	2.72	0	0	0	0	0	0	0	0	0	0	0	0	0	0	0	0	0	0	0	0	0	0	0	0	0	0	0	0	0.5	0	0	0	0	14807	ENSMUSG00000001985	Grik3	glutamate receptor/ ionotropic/ kainate 3
Gria3	0	0	0	1.32	0	0	0	0	0	0	0	0	0	0	0	0	0	0	0	0	0.28	0.73	0	0	0	0	0	0	0	0.63	0	0	0	3.52	0	0	0	1.12	53623	ENSMUSG00000001986	Gria3	glutamate receptor/ ionotropic/ AMPA3 (alpha 3)
Npas1	0	0	0	0	0	0	0	0	0	0	0	0	0	0	0	0	0	0	0	0	0	0	0	2.61	0	0	0	0	0	0	0	0	0	0	0	0	0	0	18142	ENSMUSG00000001988	Npas1	neuronal PAS domain protein 1
Sipa1l2	33.64	39.45	49.77	53.97	87.92	73.69	44.25	61.58	54.22	10.38	11.55	11.76	12.99	0	35.34	25.21	27.89	47.51	33.51	162.16	244.95	275.5	245.89	340.2	422.37	352.81	0	12.66	41.49	34.73	21.64	35.91	107.64	43.23	18.05	21.85	22.36	52.76	244668	ENSMUSG00000001995	Sipa1l2	signal-induced proliferation-associated 1 like 2
Ap4e1	29.23	38.83	31.29	26.99	19.03	21.67	34.66	40.76	36.14	15.75	19.25	23.83	0	0	12.85	47.62	27.89	30.09	36.55	86.67	61.8	50.42	65.57	24.52	41.37	34.81	104.48	94.99	85.81	41.68	44.11	39.28	30.42	59.31	40.21	52.44	78.25	32.27	108011	ENSMUSG00000001998	Ap4e1	adaptor-related protein complex AP-4/ epsilon 1
Blvra	135.11	212.92	123.72	261.97	281.88	147.38	1402.61	1302.29	782.11	1071.73	1395.31	1317.05	213.09	164.26	240.97	212.9	264.96	292.96	456.89	89.47	135.06	158.58	198.53	226.45	159.66	190.8	223.88	208.97	538.44	542.14	769.78	469.14	320.58	311.14	225.66	412.56	429.78	295.24	109778	ENSMUSG00000001999	Blvra	biliverdin reductase A
Pdzd4	97.61	56.99	62.1	1.97	0	0	0	0	3.01	0	1.93	1.81	0	0	0	0	6.97	0	0	0	1.4	0	1.82	1.04	2.18	0	12.44	0	6.6	0	0	0	0	6.03	3.28	3.5	0	0	245469	ENSMUSG00000002006	Pdzd4	PDZ domain containing 4
Srpk3	0	0	0	12.51	16.31	34.68	26.55	42.07	13.05	1.79	6.1	1.51	0	0	128.52	106.45	123.18	58.59	45.69	176.14	272.63	320.08	389.77	409.08	291.01	255.73	74.63	0	0.94	0	0.83	0	14.04	32.67	49.24	6.99	4.97	10.66	56504	ENSMUSG00000002007	Srpk3	serine/arginine-rich protein specific kinase 3
Idh3g	388.24	382.64	414.29	600.96	476.75	477.91	727.85	584.14	749.98	842.28	930.74	816.41	498.95	246.39	838.59	613.5	762.34	693.59	1059.99	486.49	593.36	876.94	681.2	925.12	796.11	686.2	562.2	1139.85	632.73	664.65	810.56	563.41	496.09	548.39	502.2	456.27	496.86	673.27	15929	ENSMUSG00000002010	Idh3g	isocitrate dehydrogenase 3 (NAD+)/ gamma
Pnck	1.1	8.14	4.74	2.63	13.6	6.5	2.21	0.43	0	0	0.32	0	0	0	0	0	0	0	0	11.18	5.59	12.42	1.82	7.83	6.53	6.69	0	0	0	0.63	0	0	0	0.5	0.82	0	0	1.68	93843	ENSMUSG00000002012	Pnck	pregnancy upregulated non-ubiquitously expressed CaM kinase
Ssr4	907.74	618.73	832.85	971.54	526.6	1015.43	601.01	451.44	526.09	980.09	825.83	826.36	647.08	479.1	976.75	1336.26	1434.04	813.94	1413.32	729.74	845.58	884.25	783.19	902.17	661.13	667.45	619.41	620.58	692.14	474.57	516.79	407.41	596.71	476.51	545.69	495.6	532.88	523.13	20832	ENSMUSG00000002014	Ssr4	signal sequence receptor/ delta
Bcap31	280.15	200.4	204.78	248.15	296.38	334.86	239.67	236.35	336.34	255.94	328.86	266.3	137.73	104.95	269.89	207.3	337.01	234.36	371.61	153.78	233.76	320.81	231.31	340.73	515.26	467.28	298.51	199.47	347.01	359.01	211.38	207.63	421.21	236.24	210.07	235.13	247.19	337.62	27061	ENSMUSG00000002015	Bcap31	B cell receptor associated protein 31
Fam98a	65.63	103.33	40.29	34.89	40.79	54.19	63.42	49.44	56.22	56.56	54.86	39.21	10.39	0	0	142.87	9.3	3.17	63.96	30.76	61.24	70.89	43.71	59.48	55.15	68.28	84.58	22.16	52.81	20.21	20.8	12.35	28.08	34.68	36.11	21.85	44.72	71.28	72722	ENSMUSG00000002017	Fam98a	family with sequence similarity 98/ member A
Ltbp2	0	1.25	0	0.66	0	0	0	1.3	0	2.51	2.57	2.41	0	0	0	0	0	0	0	0	0.28	0	0	0	0	0	0	0	0	0	0	0	0	3.02	0	0	0	0.84	16997	ENSMUSG00000002020	Ltbp2	latent transforming growth factor beta binding protein 2
Kmt2a	170.41	103.96	184.87	208	201.21	214.57	235.24	359.94	417.66	291.38	215.6	210.51	293.65	323.96	295.59	624.71	353.28	421.22	316.78	1328.07	1145.89	575.86	635.66	354.29	378.83	324.69	549.76	351.45	220.66	191.66	363.67	350.17	177.84	450.88	494.81	298.06	336.62	284.3	214162	ENSMUSG00000002028	Kmt2a	lysine (K)-specific methyltransferase 2A
Ift46	152.21	95.19	68.73	105.97	137.77	122.46	106.19	95.84	91.36	147.84	146.3	132.7	158.52	209.89	86.75	137.27	120.86	174.19	328.96	89.47	98.43	135.19	71.03	133.58	102.33	169.37	97.02	183.64	196.14	139.56	262.97	274.97	63.18	129.18	138.68	132.86	165.2	131.34	76568	ENSMUSG00000002031	Ift46	intraflagellar transport 46
Tmem25	0	10.02	3.32	3.95	1.81	0	0	0	0	2.15	0.96	0.6	0	0	0	0	0	0	0	0	0.84	0	0	6.26	4.35	0	0	0	0	0	0	0	0	0.5	7.39	0	0	0	71687	ENSMUSG00000002032	Tmem25	transmembrane protein 25
Cd3g	2.76	0	0.95	0.66	0	0	2.21	4.34	0	2.51	6.1	1.81	0	0	0	0	0	0	12.18	0	0	0	0	0	0	0	0	0	0	0	0	0	0	5.53	4.1	0	4.97	1.68	12502	ENSMUSG00000002033	Cd3g	CD3 antigen/ gamma polypeptide
Trappc6a	612.15	392.66	411.45	242.88	195.78	273.09	278.75	214.23	182.73	236.97	274.63	296.16	449.58	241.83	446.6	260.53	223.13	405.39	493.44	128.61	121.64	111.08	116.57	123.66	137.89	119.16	470.16	341.95	305.52	317.01	598.35	505.05	381.43	321.7	274.08	321.66	304.32	207.4	67091	ENSMUSG00000002043	Trappc6a	trafficking protein particle complex 6A
Supt6	185.3	249.87	292.94	205.37	239.28	149.55	474.91	339.56	311.24	200.46	356.13	289.23	111.74	9.13	93.18	134.47	65.08	202.69	155.34	226.47	187.07	170.27	191.24	164.36	115.39	191.47	151.74	240.63	271.58	185.66	214.71	217.73	163.8	173.92	243.71	212.4	221.1	208.24	20926	ENSMUSG00000002052	Supt6	SPT6/ histone chaperone and transcription elongation factor
Spag5	44.12	21.29	27.49	12.51	9.06	15.17	11.06	6.94	13.05	20.4	12.51	15.98	12.99	0	0	0	16.27	7.92	0	2.8	1.96	1.46	1.82	0	0	0	0	98.15	5.66	7.58	0	2.24	35.1	22.12	18.87	25.35	18.63	15.72	54141	ENSMUSG00000002055	Spag5	sperm associated antigen 5
Foxn1	0	0	0	0	0	1.08	0	0	0	0	0	0	0	0	0	0	0	0	0	0	0	0	0	0	0	0	0	0	0	0	0	0	0	0	0	0	0	0	15218	ENSMUSG00000002057	Foxn1	forkhead box N1
Unc119	17.65	28.18	5.69	86.89	58.01	118.12	216.07	171.73	102.41	1134.73	1728.66	1783.31	25.99	0	163.86	187.69	99.94	109.26	176.66	2.8	0.28	2.19	7.29	10.44	2.9	2.01	196.52	427.44	168.79	110.51	185.58	180.7	145.08	210.11	162.48	184.43	212.41	59.5	22248	ENSMUSG00000002058	Unc119	unc-119 lipid binding chaperone
Rab34	31.99	58.87	51.67	44.1	33.54	19.51	99.55	60.71	76.3	13.6	15.08	10.86	0	0	12.85	14.01	13.95	11.08	15.23	61.51	115.48	122.77	105.64	125.75	94.34	103.77	59.7	66.49	108.44	65.68	59.09	83.05	32.76	46.75	41.85	39.33	77.01	35.64	19376	ENSMUSG00000002059	Rab34	RAB34/ member RAS oncogene family
Sdf2	487.51	286.82	482.55	298.83	218.43	370.63	314.89	416.32	620.46	278.85	288.43	262.99	187.11	200.76	192.78	310.95	313.77	161.52	249.77	223.68	239.64	303.27	260.46	278.11	531.23	331.38	181.6	281.8	321.55	394.05	307.91	342.31	451.63	267.41	232.23	374.98	310.54	353.05	20316	ENSMUSG00000002064	Sdf2	stromal cell derived factor 2
Ccne1	13.24	13.15	5.21	3.29	3.63	8.67	8.11	12.58	17.07	24.7	16.36	14.17	10.39	0	6.43	0	20.92	0	6.09	2.8	6.15	5.85	20.04	1.57	0	0	0	0	0.94	5.68	8.32	7.86	0	7.54	3.28	13.11	1.24	5.33	12447	ENSMUSG00000002068	Ccne1	cyclin E1
Hsf2bp	0	0	0	4.61	0.91	2.17	0.74	0	0	0	0	0	0	0	0	0	0	0	0	16.78	31.04	22.65	41.89	36.52	37.74	26.78	0	0	0.94	0.63	0	10.1	0	0.5	2.46	0	0	0.84	74377	ENSMUSG00000002076	Hsf2bp	heat shock transcription factor 2 binding protein
Bbc3	20.96	42.58	20.38	19.75	28.1	56.35	47.93	36.43	41.16	18.61	15.4	19	18.19	0	212.06	137.27	181.29	349.96	207.12	55.92	36.91	37.27	52.82	41.22	23.22	26.11	291.05	132.98	165.02	233.34	144.8	282.83	194.22	106.06	93.55	122.37	105.58	92.33	170770	ENSMUSG00000002083	Bbc3	BCL2 binding component 3
Mybpc3	8.27	18.79	8.06	5.27	3.63	18.42	12.54	1.3	2.01	17.18	23.42	47.35	0	0	89.96	39.22	18.59	12.67	12.18	8.39	7.27	2.19	9.11	9.91	8.71	4.02	0	0	1.89	8.84	10.82	0	4.68	33.68	33.64	25.35	24.84	17.96	17868	ENSMUSG00000002100	Mybpc3	myosin binding protein C/ cardiac
Psmc3	720.24	694.51	534.69	506.17	550.17	759.68	404.85	459.68	497.98	452.46	513.01	465.66	779.61	615.98	1089.2	804	706.56	798.11	929.01	536.82	543.86	603.63	602.88	663.19	764.91	716.99	345.78	994.2	1201.35	713.28	798.07	845.12	882.19	644.9	575.23	800.65	621.07	432.76	19182	ENSMUSG00000002102	Psmc3	proteasome (prosome/ macropain) 26S subunit/ ATPase 3
Acp2	109.19	104.58	79.16	779.99	756.82	797.61	2114.24	1851.74	2384.47	438.86	305.11	346.23	90.95	319.4	327.72	288.54	309.12	288.2	149.25	1149.13	1188.95	1004.1	1049.11	997.65	716.28	834.82	582.1	421.11	211.23	326.17	366.16	242.43	341.65	484.05	437.37	437.04	539.09	590.48	11432	ENSMUSG00000002103	Acp2	acid phosphatase 2/ lysosomal
Rapsn	4.96	17.53	15.17	86.23	232.94	139.8	0.74	0.87	8.03	0	0	0	12.99	0	144.58	16.81	109.24	125.1	158.39	114.63	80.25	208.27	275.03	118.45	218.44	292.55	0	0	54.69	17.68	4.99	43.77	67.86	57.3	59.08	5.24	24.84	14.87	19400	ENSMUSG00000002104	Rapsn	receptor-associated protein of the synapse
Slc39a13	56.8	147.17	91.49	209.97	145.02	59.6	204.27	116.66	91.36	140.68	197.95	189.1	218.29	22.81	224.91	257.73	62.75	88.68	201.03	385.84	261.73	295.24	384.31	291.16	179.25	297.91	74.63	161.48	179.16	118.72	109.02	49.38	44.46	114.1	97.65	118.87	129.18	50.8	68427	ENSMUSG00000002105	Slc39a13	solute carrier family 39 (metal ion transporter)/ member 13
Celf2	584.57	578.02	565.03	491.03	415.12	370.63	900.41	1052.07	1206.79	804.69	665.41	498.83	893.96	570.35	803.25	829.21	1224.86	1003.97	831.54	1037.29	1118.49	1080.1	1129.25	914.69	777.97	841.51	477.62	300.79	260.26	589.5	390.3	524.13	299.52	968.6	996.19	761.32	734.11	1179.84	14007	ENSMUSG00000002107	Celf2	CUGBP/ Elav-like family member 2
Nr1h3	6.07	1.25	0	329.11	288.23	161.47	2454.2	1382.95	1063.22	171.1	308	348.34	0	0	0	14.01	55.78	12.67	76.15	11.18	6.99	8.04	7.29	10.96	3.63	4.69	0	0	28.29	35.05	27.46	19.08	14.04	31.67	28.72	51.57	34.78	26.94	22259	ENSMUSG00000002108	Nr1h3	nuclear receptor subfamily 1/ group H/ member 3
Ddb2	70.59	67.63	56.41	38.18	19.94	45.52	31.71	31.22	58.23	25.06	18.29	24.43	0	0	0	5.6	23.24	19	0	19.57	26.84	34.35	30.96	46.44	36.29	38.83	0	0	16.03	13.26	18.31	5.61	16.38	7.54	11.49	2.62	13.66	25.54	107986	ENSMUSG00000002109	Ddb2	damage specific DNA binding protein 2
Spi1	1063.81	1568.75	902.06	1693.61	1015.13	948.24	839.94	486.57	333.32	1392.46	1480.01	1677.75	3609.61	5402.39	3447.53	3442.9	3142.35	1882.83	2866.24	2924.55	2058.86	2474.43	2662.85	1758.94	610.33	947.96	6206.58	9812.17	1930.26	2147.72	2185.34	2334.47	1280	2810.81	2776.05	3131.8	3340.12	1547.21	20375	ENSMUSG00000002111	Spi1	spleen focus forming virus (SFFV) proviral integration oncogene
Sf3a1	102.58	92.06	100.97	117.16	123.27	89.95	63.42	103.21	92.37	89.85	101.06	103.14	124.74	68.44	54.62	75.64	37.19	68.09	94.42	120.23	86.12	115.46	105.64	109.05	129.9	180.75	0	117.15	115.04	162.29	82.39	79.69	58.5	73.39	87.8	80.41	55.9	74.37	67465	ENSMUSG00000002129	Sf3a1	splicing factor 3a/ subunit 1
Stat6	147.8	365.1	179.65	265.92	193.96	161.47	365.03	297.93	121.48	288.16	457.19	408.66	270.27	200.76	456.24	361.38	309.12	129.85	173.62	369.06	388.95	360.28	342.42	328.72	161.11	302.6	355.73	538.26	494.12	316.06	319.56	322.11	156.78	314.66	349.57	337.39	322.96	327.23	20852	ENSMUSG00000002147	Stat6	signal transducer and activator of transcription 6
Clgn	17.65	6.89	13.27	1.32	5.44	0	0	0	1	3.22	3.53	1.81	0	0	35.34	5.6	0	9.5	21.32	109.04	88.36	71.62	49.18	67.83	124.82	100.42	0	0	5.66	2.21	6.66	0	2.34	1.01	0.82	4.37	4.97	2.81	12745	ENSMUSG00000002190	Clgn	calmegin
Napsa	3507.98	2826.87	3200.11	144.81	111.48	97.53	130.53	161.32	127.51	439.57	424.14	557.64	2141.34	3016.03	266.68	521.06	423.01	459.23	648.79	0	0.28	0	0	4.17	7.98	18.74	0	19	21.69	21.79	15.81	75.2	198.9	219.15	143.6	45.45	26.08	14.31	16541	ENSMUSG00000002204	Napsa	napsin A aspartic peptidase
Vrk3	206.81	203.53	243.17	167.85	367.99	250.34	384.21	432.36	266.06	159.65	207.26	131.19	189.71	319.4	250.61	176.49	174.32	95.01	185.8	192.92	158.27	211.2	193.07	252.02	335.28	384.94	114.43	82.32	194.25	201.13	102.36	253.65	360.37	223.18	161.66	114.5	181.35	148.18	101568	ENSMUSG00000002205	Vrk3	vaccinia related kinase 3
Smg9	217.28	203.53	178.23	199.44	277.35	198.32	273.59	261.07	135.54	108.1	154.32	130.89	337.83	396.97	215.27	156.88	297.5	183.69	341.15	441.76	332.19	399.74	382.49	424.21	256.9	326.03	161.69	360.95	215	129.14	180.59	206.51	175.5	231.72	252.74	204.53	260.85	124.89	71997	ENSMUSG00000002210	Smg9	smg-9 homolog/ nonsense mediated mRNA decay factor (C, elegans)
Paxip1	54.05	93.31	51.19	43.44	40.79	101.87	56.05	75.02	59.24	77.32	51.01	62.73	23.39	4.56	54.62	30.82	11.62	17.42	54.83	16.78	39.71	58.46	25.5	63.66	82.01	78.33	7.46	91.82	88.64	32.52	29.13	25.81	25.74	31.16	31.18	30.59	14.91	55.57	55982	ENSMUSG00000002221	Paxip1	PAX interacting (with transcription-activation domain) protein 1
Rmnd5a	191.92	184.12	190.08	188.91	154.08	151.72	182.89	243.29	408.62	122.78	106.52	133.91	67.57	123.2	70.69	53.23	118.54	107.68	48.74	83.88	77.18	70.16	51	43.83	108.13	84.35	74.63	37.99	85.81	94.72	33.29	22.45	149.76	122.65	167.4	89.16	147.81	246.97	68477	ENSMUSG00000002222	Rmnd5a	required for meiotic nuclear division 5 homolog A
Mov10	1.65	8.77	12.8	48.71	47.13	33.59	89.97	72.42	97.39	40.45	35.93	34.38	12.99	68.44	44.98	36.42	6.97	6.33	3.05	97.86	74.94	40.19	54.64	59.48	29.03	68.28	126.87	31.66	24.52	53.99	38.28	50.51	53.82	37.2	27.9	36.71	16.15	35.64	17454	ENSMUSG00000002227	Mov10	Mov10 RISC complex RNA helicase
Ppm1j	63.42	120.87	176.81	7.9	4.53	20.59	0.74	2.17	0	175.04	205.98	196.03	135.13	232.7	0	0	9.3	0	24.37	5.59	13.42	19	16.39	8.87	5.08	18.08	0	0	0	0.32	0	0	2.34	6.53	15.59	1.75	14.91	4.77	71887	ENSMUSG00000002228	Ppm1j	protein phosphatase 1J
Rhoc	79.96	137.15	228	157.32	130.52	167.97	79.64	92.8	58.23	839.77	969.56	1352.33	67.57	155.14	125.31	212.9	197.56	259.7	304.59	114.63	95.63	110.35	138.42	129.92	169.82	166.03	186.57	411.61	303.64	315.75	503.48	519.64	559.27	463.44	451.32	525.32	585.05	623.6	11853	ENSMUSG00000002233	Rhoc	ras homolog family member C
Tead3	26.47	9.39	9.95	13.16	12.69	5.42	0	0	0	0	0	1.21	0	0	0	0	0	0	0	25.16	30.48	24.12	12.75	22.44	15.24	16.07	0	0	0	2.84	0	8.98	0	2.51	0.82	0	0	1.12	21678	ENSMUSG00000002249	Tead3	TEA domain family member 3
Ppard	36.95	43.21	24.18	310.02	135.05	143.05	61.94	45.1	71.28	127.79	119.99	189.7	15.59	0	141.37	28.01	111.56	101.35	161.44	332.72	193.5	233.12	278.67	284.37	81.28	151.3	17.41	126.65	89.58	95.67	71.57	69.59	21.06	56.8	72.21	46.33	69.56	59.5	19015	ENSMUSG00000002250	Ppard	peroxisome proliferator activator receptor delta
Def6	212.32	258.01	317.12	64.51	83.39	125.71	49.41	68.95	64.26	274.91	295.17	359.5	340.43	109.51	404.84	134.47	181.29	232.78	118.79	195.72	100.66	107.43	98.35	118.45	66.77	153.31	52.24	41.16	129.19	124.72	109.85	142.54	229.32	189.5	196.12	198.41	203.71	120.12	23853	ENSMUSG00000002257	Def6	differentially expressed in FDCP 6
Peg3	0	0	0	3.29	0.91	0	0	0	0	0	0	0	0	0	0	0	0	0	0	0	0.56	0.73	0	0	0	2.01	0	0	0	4.74	0	0	0	1.51	0	0.87	0	1.96	18616	ENSMUSG00000002265	Peg3	paternally expressed 3
Metrn	54.05	68.26	13.75	59.9	24.47	96.45	82.59	37.73	36.14	57.99	70.26	60.62	116.94	214.45	308.45	39.22	0	61.76	70.06	64.31	79.13	71.62	81.96	62.61	37.01	31.46	87.07	0	63.18	47.99	112.35	94.28	67.86	47.25	64.83	101.39	94.4	94.02	70083	ENSMUSG00000002274	Metrn	meteorin/ glial cell differentiation regulator
Lmf1	62.87	40.71	41.24	152.05	103.33	131.13	134.21	122.73	113.45	124.93	154.64	157.13	83.16	0	61.05	266.13	99.94	142.52	225.4	609.51	434.25	586.09	550.06	416.91	235.13	259.75	216.42	132.98	105.61	122.51	213.87	185.19	173.16	231.72	256.02	237.75	242.22	172.32	76483	ENSMUSG00000002279	Lmf1	lipase maturation factor 1
Ciao3	70.59	93.94	102.86	123.75	136.86	76.94	211.65	173.47	157.63	100.23	166.83	141.14	150.73	4.56	73.9	128.86	99.94	77.59	234.54	156.57	145.96	158.58	207.64	182.62	153.13	208.2	156.72	9.5	120.7	94.72	166.44	99.89	121.68	101.54	127.19	134.61	99.37	87.28	67563	ENSMUSG00000002280	Ciao3	cytosolic iron-sulfur assembly component 3
Angptl4	2.76	0	0	13.16	46.22	6.5	514.73	614.5	612.43	570.23	916.3	1236.52	18.19	4.56	0	0	13.95	83.93	0	0	1.96	0.73	0	4.7	4.35	6.69	0	0	7.54	16.73	42.44	37.04	37.44	13.07	4.92	37.59	14.91	8.42	57875	ENSMUSG00000002289	Angptl4	angiopoietin-like 4
NA	0.55	0	0	0.66	1.81	1.08	0	0.87	0	1.07	0.96	0.3	0	0	3.21	0	2.32	0	0	0	0.56	0.73	0	0.52	0	0	0	6.33	0	1.26	0	2.24	4.68	0	0	0.87	1.24	1.12	NA	ENSMUSG00000002290	NA	NA
Dbf4	39.16	25.68	29.86	34.23	44.41	19.51	22.86	39.46	22.09	58.35	42.99	33.48	10.39	41.07	0	25.21	9.3	4.75	51.78	39.14	43.62	24.85	23.68	12.52	21.05	12.72	54.73	0	15.09	24	9.15	10.1	28.08	43.23	45.13	68.18	59.62	42.38	27214	ENSMUSG00000002297	Dbf4	DBF4 zinc finger
Daxx	99.27	118.36	107.13	116.51	153.18	148.47	202.06	153.52	129.51	142.11	159.78	194.53	174.11	136.88	51.41	117.66	95.29	166.27	39.6	120.23	95.35	72.35	78.32	99.14	94.34	75.65	111.94	129.82	176.34	90.94	68.24	74.07	278.46	143.25	162.48	161.7	139.12	181.3	13163	ENSMUSG00000002307	Daxx	Fas death domain-associated protein
Cd320	68.38	98.95	124.19	38.84	43.51	33.59	18.44	20.38	6.02	11.1	27.59	31.97	0	41.07	0	0	25.57	15.84	79.19	30.76	32.44	64.31	49.18	37.05	26.85	53.56	0	98.15	27.35	8.21	22.47	44.89	7.02	29.15	9.85	21.85	7.45	10.1	54219	ENSMUSG00000002308	Cd320	CD320 antigen
Ipo4	169.86	139.65	89.59	132.96	75.23	185.31	160.02	149.61	165.66	137.81	150.15	155.92	15.59	77.57	73.9	33.62	39.51	55.42	176.66	131.41	120.8	120.58	169.39	175.84	171.27	173.39	22.39	63.32	115.99	88.41	101.53	89.79	138.06	66.85	53.34	115.38	88.19	60.06	75751	ENSMUSG00000002319	Ipo4	importin 4
Tm9sf1	15.99	36.95	7.11	11.85	11.78	14.09	22.12	9.54	9.04	9.66	14.12	12.37	0	0	12.85	0	6.97	7.92	0	69.9	50.33	14.62	16.39	16.7	24.67	10.04	0	0	3.77	9.47	9.99	7.86	0	13.07	13.13	6.12	22.36	11.23	74140	ENSMUSG00000002320	Tm9sf1	transmembrane 9 superfamily member 1
Rec8	0	0	1.42	3.95	6.34	34.68	0	0	0	0	0	0	0	0	0	0	2.32	1.58	36.55	2.8	1.68	1.46	0	0.52	7.26	0	0	0	4.71	4.42	3.33	13.47	0	4.02	0	0	0	0	56739	ENSMUSG00000002324	Rec8	REC8 meiotic recombination protein
Irf9	99.82	92.06	121.35	298.18	539.29	601.46	401.17	542.95	518.06	78.75	70.26	129.68	566.52	223.58	517.29	190.49	276.58	394.3	310.69	195.72	226.77	199.5	193.07	208.19	439.06	434.48	131.84	174.14	483.74	378.9	334.54	423.12	671.59	257.86	298.69	234.25	286.93	462.51	16391	ENSMUSG00000002325	Irf9	interferon regulatory factor 9
Gmpr2	175.92	198.52	145.05	168.51	189.43	174.48	329.64	241.98	312.24	174.33	192.5	204.78	150.73	310.27	228.12	168.08	225.45	253.37	335.05	301.96	336.94	467.7	429.85	411.17	345.44	439.17	303.49	60.16	226.31	124.09	179.75	235.69	269.1	197.04	195.3	198.41	190.05	231.81	105446	ENSMUSG00000002326	Gmpr2	guanosine monophosphate reductase 2
Mdp1	284.01	237.97	275.41	188.25	194.87	244.92	154.13	174.33	206.82	109.18	103.63	91.38	431.39	497.35	205.63	173.69	118.54	324.63	234.54	170.55	137.57	231.66	273.21	211.32	263.44	222.26	79.6	148.81	210.28	267.75	184.75	187.43	91.26	113.6	123.09	152.96	127.94	134.15	67881	ENSMUSG00000002329	Mdp1	magnesium-dependent phosphatase 1
Dhrs1	410.3	226.7	307.16	325.16	266.47	313.19	1036.1	870.36	792.15	276.34	323.08	430.07	155.92	54.75	109.24	226.91	271.93	159.94	185.8	53.12	123.87	160.04	171.21	169.58	211.18	183.43	136.82	449.61	249.89	213.13	208.88	181.82	219.96	175.42	154.27	233.38	211.16	253.42	52585	ENSMUSG00000002332	Dhrs1	dehydrogenase/reductase (SDR family) member 1
Ncan	0.55	0	0	0	0	0	0	0	0	0	0	0	0	0	0	0	0	0	0	0	0	0	0	0	0	0	0	0	0	0	0	0	0	0	0	0	0	0	13004	ENSMUSG00000002341	Ncan	neurocan
Tmem161a	142.83	110.85	91.96	84.91	91.54	92.11	150.44	118.39	100.4	58.71	100.1	98.92	5.2	59.32	51.41	75.64	99.94	63.34	82.24	44.74	115.48	137.39	154.82	102.79	131.36	116.49	4.98	123.48	134.84	113.04	79.89	107.74	65.52	76.4	64.83	83.04	74.53	80.55	234371	ENSMUSG00000002342	Tmem161a	transmembrane protein 161A
Armc6	14.89	24.42	11.38	44.1	61.63	22.76	56.78	61.58	8.03	35.8	51.01	35.59	2.6	0	12.85	2.8	37.19	52.26	27.41	89.47	33.55	40.92	47.36	62.61	50.8	76.99	0	12.66	29.23	27.15	71.57	67.34	53.82	38.2	36.93	62.93	45.96	33.4	76813	ENSMUSG00000002343	Armc6	armadillo repeat containing 6
Borcs8	262.51	190.38	256.92	108.61	105.14	110.54	57.52	83.7	59.24	100.59	133.79	129.08	356.02	255.52	202.42	165.28	109.24	110.85	344.19	39.14	52.29	48.23	74.68	67.83	74.75	54.23	293.54	148.81	93.35	63.15	137.31	62.85	145.08	89.47	117.34	122.37	110.55	86.16	72368	ENSMUSG00000002345	Borcs8	BLOC-1 related complex subunit 8
Slc25a42	14.89	15.66	11.38	25.67	18.13	29.26	48.67	56.81	48.19	17.54	23.1	17.79	0	68.44	0	0	2.32	0	0	33.55	25.17	23.39	38.25	16.18	31.21	36.15	0	0	28.29	8.84	29.96	4.49	9.36	3.52	4.92	27.1	8.69	3.65	73095	ENSMUSG00000002346	Slc25a42	solute carrier family 25/ member 42
Snx9	237.69	269.91	347.46	170.48	265.57	225.41	249.99	404.17	531.11	163.59	122.88	171.3	137.73	31.94	64.26	39.22	86	107.68	118.79	83.88	106.54	80.39	107.46	110.1	185.06	162.68	223.88	512.93	368.7	284.49	187.24	251.4	287.82	159.84	136.22	218.52	173.9	308.99	66616	ENSMUSG00000002365	Snx9	sorting nexin 9
Ranbp3	230.52	254.26	268.77	210.63	195.78	226.49	289.81	216.4	219.87	211.2	246.4	253.94	220.89	168.82	80.32	126.06	144.1	254.95	219.31	279.59	273.19	230.2	280.49	388.21	382.45	358.16	353.24	272.3	166.91	161.66	156.45	214.37	348.67	237.25	197.76	199.29	198.74	127.13	71810	ENSMUSG00000002372	Ranbp3	RAN binding protein 3
Ndufa11	822.81	497.87	611.49	528.55	424.18	696.82	394.53	254.13	282.12	508.3	649.37	576.04	834.19	538.41	186.35	375.39	446.25	425.97	965.57	528.43	290.81	461.85	369.74	397.6	273.6	337.41	930.37	386.28	694.97	413.95	831.36	567.9	512.47	472.49	473.48	559.41	577.6	322.74	69875	ENSMUSG00000002379	Ndufa11	NADH:ubiquinone oxidoreductase subunit A11
Nr2f6	61.77	68.26	43.14	119.8	142.3	157.14	194.68	232.88	126.5	85.19	145.98	147.18	33.78	292.02	70.69	64.43	109.24	131.43	97.47	83.88	116.6	103.77	140.25	139.32	96.52	167.37	39.8	75.99	83.92	196.71	137.31	149.27	119.34	66.35	83.7	118	106.82	79.98	13864	ENSMUSG00000002393	Nr2f6	nuclear receptor subfamily 2/ group F/ member 6
Use1	1767.5	1644.52	1907.46	581.87	571.01	822.53	670.33	590.22	419.67	486.82	590.01	354.97	1642.39	1405.35	1368.73	983.28	822.77	1708.64	2546.41	718.56	499.4	692.05	734.02	636.58	563.88	571.05	995.04	918.21	1205.12	1137.64	1478.81	1570.15	1053.02	1164.13	1067.59	917.78	1058.3	454.09	67023	ENSMUSG00000002395	Use1	unconventional SNARE in the ER 1 homolog (S, cerevisiae)
Ocel1	183.64	131.51	115.19	109.92	157.71	186.4	187.31	218.13	152.61	75.53	87.59	85.95	428.79	173.39	122.09	232.51	81.35	253.37	176.66	92.27	70.74	81.12	71.03	80.88	86.36	74.98	333.34	136.15	197.08	299.33	458.54	523.01	156.78	154.82	145.24	118	163.96	96.26	77090	ENSMUSG00000002396	Ocel1	occludin/ELL domain containing 1
Dyrk1b	24.82	60.75	16.12	27.65	12.69	11.92	36.87	6.5	7.03	11.45	17.97	10.56	62.37	0	0	30.82	37.19	15.84	54.83	39.14	51.17	59.92	49.18	31.83	6.53	16.07	4.98	0	31.12	34.1	17.48	10.1	4.68	44.74	56.62	57.69	62.11	33.12	13549	ENSMUSG00000002409	Dyrk1b	dual-specificity tyrosine-(Y)-phosphorylation regulated kinase 1b
Braf	121.33	142.16	127.99	38.84	49.85	36.85	111.35	128.36	167.67	57.27	46.52	53.68	0	118.63	73.9	53.23	72.05	68.09	18.28	125.82	91.16	84.77	78.32	40.7	55.88	85.69	27.36	19	36.78	52.41	93.21	35.91	18.72	61.83	53.34	60.31	39.75	58.09	109880	ENSMUSG00000002413	Braf	Braf transforming gene
Ndufb2	302.76	246.74	460.75	398.23	309.07	500.67	300.14	192.11	280.11	529.06	453.34	525.97	597.7	369.59	594.4	260.53	132.48	387.97	438.62	123.02	104.86	182.7	156.64	163.84	269.24	169.37	283.59	218.47	328.15	378.27	485.17	558.93	489.07	252.83	201.04	297.18	295.63	305.91	68198	ENSMUSG00000002416	Ndufb2	NADH:ubiquinone oxidoreductase subunit B2
Hltf	95.41	125.25	124.19	135.59	98.79	174.48	244.09	286.22	356.42	112.4	93.04	95	18.19	4.56	163.86	252.12	213.83	110.85	204.08	229.27	200.77	173.2	224.03	184.19	186.51	177.41	231.35	170.98	109.38	103.57	80.72	134.68	56.16	181.46	143.6	139.85	144.09	175.4	20585	ENSMUSG00000002428	Hltf	helicase-like transcription factor
Prpf6	132.91	174.1	155	78.33	126.89	137.63	101.03	147.01	90.36	75.17	104.59	90.78	96.15	173.39	144.58	277.34	192.91	144.1	15.23	184.53	158.83	85.5	127.5	105.92	142.97	167.37	151.74	278.63	237.63	104.83	168.94	159.37	121.68	104.05	128.83	101.39	104.34	95.7	68879	ENSMUSG00000002455	Prpf6	pre-mRNA splicing factor 6
Rgs19	671.71	741.48	726.2	400.2	457.72	370.63	685.08	787.53	884.51	797.17	725.41	746.14	545.73	862.37	591.19	557.47	546.19	685.67	618.33	749.31	669.97	906.17	724.91	1142.19	1016.73	1221.1	365.68	300.79	164.08	692.44	535.1	423.12	702.01	463.44	489.07	428.3	511.76	484.12	56470	ENSMUSG00000002458	Rgs19	regulator of G-protein signaling 19
Rgs20	4.96	1.25	0	0	0	0	0	0	0	0	0	0	0	0	0	0	0	0	0	0	0	0	0	0	0	0	0	0	0	0	0	0	0	0	0	0	0	0	58175	ENSMUSG00000002459	Rgs20	regulator of G-protein signaling 20
Abhd3	1.1	2.5	1.42	2.63	3.63	3.25	8.11	13.01	20.08	74.81	70.26	61.83	15.59	0	16.06	0	0	7.92	9.14	2.8	14.82	21.19	10.93	18.26	32.66	39.5	0	0	0.94	1.58	2.5	5.61	9.36	4.52	4.92	1.75	4.97	5.33	106861	ENSMUSG00000002475	Abhd3	abhydrolase domain containing 3
Snrpd1	422.99	276.17	336.55	121.11	153.18	324.03	140.11	196.45	297.18	286.73	299.66	274.45	369.02	323.96	314.87	128.86	202.21	292.96	313.73	39.14	53.97	81.85	69.21	143.49	175.62	143.93	196.52	497.1	377.19	310.7	305.41	320.99	255.06	166.38	189.56	212.4	162.72	200.1	20641	ENSMUSG00000002477	Snrpd1	small nuclear ribonucleoprotein D1
Tchp	11.58	11.9	34.6	58.58	38.97	81.28	62.68	55.51	42.17	42.96	17.65	28.05	44.18	191.64	16.06	84.04	6.97	49.09	0	260.02	263.4	151.27	203.99	139.84	140.79	175.4	169.16	94.99	56.58	59.68	62.41	68.46	18.72	75.9	73.85	52.44	58.38	44.34	77832	ENSMUSG00000002486	Tchp	trichoplein/ keratin filament binding
Tiam1	76.1	77.03	91.01	13.82	3.63	9.75	0.74	0.87	8.03	0.72	1.28	0	194.9	200.76	6.43	16.81	20.92	14.25	51.78	53.12	48.37	8.04	18.21	8.35	29.75	20.08	54.73	25.33	18.86	41.99	17.48	25.81	72.54	38.7	9.85	25.35	13.66	20.49	21844	ENSMUSG00000002489	Tiam1	T cell lymphoma invasion and metastasis 1
Tsc2	232.17	202.9	182.02	158.63	136.86	221.08	191.73	192.11	180.72	196.52	177.42	149.29	265.07	438.03	202.42	201.7	165.02	112.43	377.7	232.06	201.61	249.2	245.89	293.24	172.72	265.11	87.07	215.3	299.86	239.34	299.59	133.56	180.18	190.5	172.32	188.8	198.74	115.91	22084	ENSMUSG00000002496	Tsc2	TSC complex subunit 2
Rpl3l	8.82	2.5	0.47	0.66	0	3.25	0	0	0	59.42	51.33	48.56	0	0	0	0	0	0	0	0	0	0	0	0.52	0	0	0	0	3.77	0.95	0.83	0	9.36	8.04	18.05	8.74	2.48	7.58	66211	ENSMUSG00000002500	Rpl3l	ribosomal protein L3-like
Slc9a3r2	12.13	18.79	12.8	95.44	34.44	58.52	5.16	4.77	2.01	48.32	73.47	75.1	70.17	50.19	0	8.4	32.54	28.5	39.6	11.18	11.46	15.35	25.5	11.48	10.16	18.74	149.26	449.61	210.28	271.54	216.37	337.82	88.92	78.92	62.36	298.93	199.98	181.3	65962	ENSMUSG00000002504	Slc9a3r2	solute carrier family 9 (sodium/hydrogen exchanger)/ member 3 regulator 2
Puf60	668.95	522.29	602.48	476.55	693.37	486.58	480.07	416.75	566.25	517.25	647.77	618.26	680.86	447.16	542.99	156.88	488.09	364.21	228.45	402.62	536.59	684.74	562.81	687.71	581.3	688.88	417.92	607.92	590.3	500.78	610.83	654.32	559.27	491.59	506.3	569.9	459.59	462.23	67959	ENSMUSG00000002524	Puf60	poly-U binding splicing factor 60
Golga2	208.46	139.03	166.38	111.9	216.62	166.89	161.5	199.49	196.78	126	128.33	119.73	135.13	4.56	173.5	212.9	139.45	185.27	115.75	229.27	229.01	178.31	196.71	202.45	164.01	172.72	74.63	63.32	314.95	146.19	173.93	141.41	224.64	158.33	136.22	89.16	116.76	137.52	99412	ENSMUSG00000002546	Golga2	golgi autoantigen/ golgin subfamily a/ 2
Uck1	63.42	58.87	43.14	73.06	122.36	67.19	104.72	81.53	99.39	77.68	100.42	125.16	25.99	9.13	6.43	36.42	48.81	28.5	67.01	100.65	106.82	93.54	98.35	128.88	97.25	93.72	9.95	12.66	42.43	23.68	69.07	40.4	44.46	44.74	45.13	51.57	55.9	33.12	22245	ENSMUSG00000002550	Uck1	uridine-cytidine kinase 1
Scin	246.51	325.65	547.97	47.39	7.25	48.77	0	0	10.04	0	0	0	2.6	0	0	0	0	0	0	0	0	0	0	0	0	0.67	0	0	0	0	0.83	0	0	0	0	0	0	0	20259	ENSMUSG00000002565	Scin	scinderin
Ikzf4	5.51	5.01	10.9	0.66	0.91	0	0	1.3	0	5.37	8.98	7.24	0	0	0	0	0	0	6.09	0	0.28	0.73	0	0	0	0	0	0	0.94	0.32	2.5	0	2.34	1.01	6.56	5.24	1.24	0	22781	ENSMUSG00000002578	Ikzf4	IKAROS family zinc finger 4
Mien1	397.62	313.75	358.36	788.55	582.79	511.51	717.53	469.22	361.44	871.63	1226.55	1128.55	810.8	798.5	555.85	386.59	350.96	433.89	606.14	352.29	400.42	559.78	453.52	456.04	205.38	240.34	524.89	563.59	293.26	558.24	367.83	365.88	582.67	450.88	450.5	438.78	568.9	495.06	103742	ENSMUSG00000002580	Mien1	migration and invasion enhancer 1
Pon1	0	0	0	0	0	0	0	0	0	0	0.32	1.21	0	0	0	0	0	0	0	0	0	0	0	0	0	0	0	0	0	0	0	0	0	0	0	0	0	0	18979	ENSMUSG00000002588	Pon1	paraoxonase 1
Axl	11.03	23.17	1.42	1512.6	2404.59	1958.25	10984.2	13771.8	10070	5210.81	4187.85	3882.68	449.58	460.85	2837.06	3031.09	3279.47	3167.08	2835.78	148.18	39.71	39.46	41.89	60.53	78.38	54.9	97.02	12.66	62.24	43.57	138.98	89.79	924.31	1066.62	1111.9	442.28	452.14	444.26	26362	ENSMUSG00000002602	Axl	AXL receptor tyrosine kinase
Tgfb1	188.06	251.75	210.46	1070.93	461.34	447.57	2126.78	910.26	441.75	1269.32	1173.29	1718.16	517.14	333.09	1118.12	582.69	743.75	585.91	1148.32	1641.22	768.68	1221.87	1930.66	1441.69	325.12	619.25	1308.48	595.25	616.7	554.14	704.87	805.84	276.12	914.82	818.95	851.35	751.5	356.42	21803	ENSMUSG00000002603	Tgfb1	transforming growth factor/ beta 1
Ccdc97	50.18	109.59	60.2	215.9	141.39	173.39	318.57	241.12	234.93	234.82	239.02	275.65	140.33	50.19	228.12	145.67	65.08	158.35	146.21	206.9	319.89	275.5	311.46	279.15	182.16	265.11	32.34	104.49	93.35	77.04	115.67	145.9	88.92	84.95	80.42	62.06	99.37	101.31	52132	ENSMUSG00000002608	Ccdc97	coiled-coil domain containing 97
Zfp40	1.1	18.16	2.84	1.97	4.53	0	2.21	1.73	0	1.07	0.64	0.6	7.8	0	0	0	13.95	22.17	0	33.55	45.02	30.69	21.86	24	1.45	10.04	12.44	0	0	8.53	12.48	7.86	2.34	18.1	22.16	20.1	9.94	14.87	22700	ENSMUSG00000002617	Zfp40	zinc finger protein 40
Akap8l	64.52	170.34	97.65	266.58	182.18	83.45	387.16	333.92	136.54	71.95	132.83	128.48	241.68	552.1	446.6	431.41	416.04	419.64	392.93	1473.46	855.64	1141.48	1069.15	737.28	404.95	581.76	301	544.59	552.58	295.22	376.98	438.84	149.76	343.31	405.37	389.84	334.14	134.71	54194	ENSMUSG00000002625	Akap8l	A kinase (PRKA) anchor protein 8-like
Shh	0	0	0	0.66	0	0	0	0	0	0	0	0	0	0	0	0	0	0	0	0	0	0	0	0	0	0	0	0	0	0	0	0	0	0	0	0	0	0	20423	ENSMUSG00000002633	Shh	sonic hedgehog
Pdcd2l	136.77	88.3	131.78	204.05	151.36	234.08	400.43	334.79	454.81	132.44	130.9	192.41	103.95	159.7	138.16	173.69	276.58	137.77	146.21	111.84	212.51	195.85	142.07	188.89	147.32	137.91	303.49	202.64	206.51	131.04	119.84	108.87	149.76	175.42	241.25	159.08	204.95	247.81	68079	ENSMUSG00000002635	Pdcd2l	programmed cell death 2-like
Gtf2f1	170.41	345.06	259.29	260	250.16	216.74	214.6	154.82	85.34	252.36	297.73	251.83	259.87	136.88	469.1	467.83	371.88	356.3	307.64	380.25	246.07	323.01	258.64	233.76	190.14	190.13	104.48	395.78	401.71	209.03	285.44	436.59	191.88	522.25	464.45	542.8	516.73	210.77	98053	ENSMUSG00000002658	Gtf2f1	general transcription factor IIF/ polypeptide 1
Clpp	53.49	56.36	25.12	116.51	66.16	46.6	124.63	100.18	46.18	88.77	119.35	137.22	98.75	100.38	89.96	156.88	90.64	66.51	137.07	248.84	158.55	182.7	167.57	150.8	52.25	97.74	221.4	202.64	124.47	90.3	163.94	126.82	77.22	141.75	165.76	99.64	135.39	64.27	53895	ENSMUSG00000002660	Clpp	caseinolytic mitochondrial matrix peptidase proteolytic subunit
Alkbh7	12.13	6.26	11.85	127.7	95.17	121.37	57.52	60.28	23.09	45.1	57.43	56.7	176.71	141.45	16.06	134.47	48.81	136.18	97.47	120.23	101.22	195.12	200.35	139.84	130.63	98.41	0	215.3	129.19	139.88	143.97	171.72	95.94	129.18	107.5	134.61	144.09	82.23	66400	ENSMUSG00000002661	Alkbh7	alkB homolog 7
Pspn	0	0	0	0	0	0	0	0	0	0	0	0	0	0	0	0	0	0	0	0	0	0	0	0.52	0	0	0	0	0	0	0	0	0	0	0	0	0	0	19197	ENSMUSG00000002664	Pspn	persephin
Dennd1c	224.45	298.72	241.75	416	240.19	200.49	697.62	367.31	428.7	205.47	191.22	217.75	280.66	127.76	154.22	187.69	102.27	221.7	176.66	796.84	625.51	694.24	686.66	731.54	428.17	508.12	221.4	360.95	361.16	203.03	273.79	263.75	283.14	315.66	293.77	269.21	329.17	201.22	70785	ENSMUSG00000002668	Dennd1c	DENN/MADD domain containing 1C
Med6	73.9	68.26	61.15	73.72	67.98	76.94	62.68	62.01	156.62	69.8	56.79	38.3	83.16	0	9.64	44.82	16.27	17.42	30.46	61.51	52.29	61.39	63.75	99.66	87.81	70.96	0	0	92.41	31.26	24.13	32.55	28.08	48.76	68.93	42.83	67.08	113.1	69792	ENSMUSG00000002679	Med6	mediator complex subunit 6
Prkd1	0	0	0	0	0	0	0	0	0	0	0	0	0	0	0	0	13.95	1.58	0	0	0	0	0	0	0	0	0	0	0	0	0	0	0	0	0	0	0	0	18760	ENSMUSG00000002688	Prkd1	protein kinase D1
Lcp2	272.43	366.98	339.87	296.2	507.57	350.04	732.28	818.76	772.07	254.87	247.04	303.1	67.57	109.51	257.04	168.08	362.58	297.71	103.56	290.78	412.72	270.39	227.67	392.38	396.24	355.48	169.16	202.64	156.53	259.23	99.03	235.69	159.12	236.75	196.94	204.53	207.44	249.21	16822	ENSMUSG00000002699	Lcp2	lymphocyte cytosolic protein 2
Cse1l	138.42	78.91	142.68	89.52	90.64	110.54	65.63	92.8	135.54	70.52	61.28	68.16	57.17	0	44.98	56.03	74.38	53.84	67.01	123.02	86.4	120.58	60.11	80.35	123.37	120.5	59.7	0	46.21	52.1	40.78	41.53	35.1	76.91	52.52	62.06	53.41	97.38	110750	ENSMUSG00000002718	Cse1l	chromosome segregation 1-like (S, cerevisiae)
Naa20	36.4	26.3	37.45	41.47	75.23	61.77	24.34	31.22	42.17	39.38	44.6	30.76	44.18	63.88	28.92	84.04	81.35	50.67	57.87	95.06	74.94	48.96	58.28	43.83	59.51	56.9	99.5	28.5	38.66	110.2	49.93	52.75	145.08	58.81	51.7	61.19	83.22	124.05	67877	ENSMUSG00000002728	Naa20	N(alpha)-acetyltransferase 20/ NatB catalytic subunit
Prkra	130.7	105.84	113.29	98.73	96.98	91.03	81.12	84.56	190.76	61.57	52.94	58.51	122.14	54.75	57.83	201.7	92.97	186.86	94.42	72.69	75.78	61.39	67.39	93.4	147.32	128.54	0	94.99	55.64	93.15	114.84	85.3	112.32	72.38	73.03	71.67	89.43	156.04	23992	ENSMUSG00000002731	Prkra	protein kinase/ interferon inducible double stranded RNA dependent activator
Fkbp7	14.89	21.92	11.85	3.95	7.25	1.08	10.32	13.44	25.1	8.95	5.78	6.33	0	0	0	0	13.95	3.17	3.05	44.74	60.68	46.04	65.57	70.96	131.36	56.23	42.29	0	0	34.73	15.81	25.81	16.38	14.07	18.87	22.73	6.21	39.29	14231	ENSMUSG00000002732	Fkbp7	FK506 binding protein 7
Plekha3	45.77	92.68	52.62	70.43	67.07	68.27	70.79	65.48	93.37	87.7	70.58	89.27	57.17	0	99.6	67.23	65.08	57.01	63.96	86.67	53.41	35.08	52.82	62.09	95.07	48.2	0	72.82	33.95	59.36	57.42	61.73	56.16	62.83	69.75	99.64	62.11	95.42	83435	ENSMUSG00000002733	Plekha3	pleckstrin homology domain-containing/ family A (phosphoinositide binding specific) member 3
Ykt6	251.48	246.11	311.91	285.67	246.53	319.69	247.04	144.41	150.6	331.11	326.29	457.51	272.86	100.38	215.27	257.73	197.56	153.6	158.39	397.02	645.37	658.43	883.37	799.37	732.25	587.12	94.53	269.13	245.17	173.66	178.09	173.96	278.46	142.75	125.55	169.57	216.13	343.23	56418	ENSMUSG00000002741	Ykt6	YKT6 v-SNARE homolog (S, cerevisiae)
Baz1b	194.67	112.1	168.28	251.44	261.03	276.34	233.77	282.31	351.4	188.64	167.15	238.86	145.53	241.83	202.42	409	174.32	210.61	57.87	338.31	334.99	167.35	200.35	176.36	153.85	200.17	226.37	468.6	254.6	219.76	143.97	120.09	255.06	278.97	324.95	238.62	223.59	282.05	22385	ENSMUSG00000002748	Baz1b	bromodomain adjacent to zinc finger domain/ 1B
Pex6	86.03	141.53	38.87	173.11	96.08	70.44	205.01	106.68	133.53	77.32	112.61	143.26	85.76	333.09	215.27	56.03	111.56	57.01	76.15	343.9	246.07	325.2	335.13	256.72	103.78	197.49	52.24	120.32	165.02	95.99	193.07	131.31	88.92	282.99	211.71	224.64	284.45	84.76	224824	ENSMUSG00000002763	Pex6	peroxisomal biogenesis factor 6
Mrpl2	166.55	146.54	111.87	156	161.33	105.12	176.25	151.35	130.52	143.54	191.86	176.73	127.34	287.46	157.44	134.47	220.8	87.09	91.38	173.35	125.55	222.16	140.25	223.32	123.37	172.05	131.84	170.98	235.74	130.09	193.9	163.86	229.32	114.1	123.91	169.57	172.66	63.99	27398	ENSMUSG00000002767	Mrpl2	mitochondrial ribosomal protein L2
Mea1	226.11	413.32	177.28	107.95	133.24	97.53	131.26	98.44	86.34	109.54	147.26	82.94	587.31	602.29	308.45	680.74	653.11	327.79	764.53	195.72	128.63	187.08	112.93	110.62	86.36	125.19	517.42	303.96	271.58	247.23	348.69	429.86	266.76	333.26	362.7	477.24	449.66	235.46	17256	ENSMUSG00000002768	Mea1	male enhanced antigen 1
Gnmt	3.31	7.51	7.11	1.32	0	2.17	17.7	4.77	17.07	1.43	4.17	6.03	0	0	6.43	0	0	9.5	0	0	6.43	10.96	0	4.7	4.35	4.69	0	22.16	25.46	6	0	0	0	4.52	9.85	3.5	22.36	5.05	14711	ENSMUSG00000002769	Gnmt	glycine N-methyltransferase
Grin2d	14.34	14.4	2.84	0.66	0.91	0	2.21	0	0	1.79	1.6	3.02	0	0	0	0	13.95	0	0	0	0.28	0	1.82	0.52	0.73	0	14.93	15.83	3.77	2.53	3.33	38.16	0	9.55	3.28	3.5	2.48	3.65	14814	ENSMUSG00000002771	Grin2d	glutamate receptor/ ionotropic/ NMDA2D (epsilon 4)
Kdelr1	414.71	427.73	475.92	482.48	483.09	424.81	477.86	419.79	350.39	638.6	710.01	634.55	293.65	720.93	1005.66	445.42	269.61	688.84	545.22	318.74	305.63	480.12	448.06	393.95	393.34	532.89	457.72	516.1	566.73	583.5	466.86	672.28	423.55	255.35	274.08	340.01	344.07	436.69	68137	ENSMUSG00000002778	Kdelr1	KDEL (Lys-Asp-Glu-Leu) endoplasmic reticulum protein retention receptor 1
Tmem143	62.87	51.98	47.88	58.58	103.33	49.85	104.72	97.57	106.42	35.8	61.28	91.08	64.97	36.5	48.19	50.42	155.72	93.43	197.99	78.29	91.44	92.81	112.93	70.44	175.62	136.57	0	0	80.15	47.68	69.9	88.66	84.24	52.78	44.31	55.07	77.01	55.85	70209	ENSMUSG00000002781	Tmem143	transmembrane protein 143
Pdxk-ps	0	0	0	0	0	8.67	0	1.3	0	0	0	0	0	0	0	0	4.65	0	0	0	0	0	0	0.52	0	0	0	0	0.94	0	0	0	0	0	0	0	0	1.4	435518	ENSMUSG00000002791	Pdxk-ps	pyridoxal (pyridoxine/ vitamin B6) kinase/ pseudogene
Ggct	151.66	50.73	40.29	26.33	45.32	36.85	48.67	58.54	111.44	75.89	55.5	51.27	28.59	191.64	48.19	78.44	123.18	17.42	30.46	8.39	10.91	15.35	27.32	17.74	17.42	14.73	0	47.49	3.77	21.47	15.81	44.89	7.02	22.62	27.08	34.96	22.36	18.24	110175	ENSMUSG00000002797	Ggct	gamma-glutamyl cyclotransferase
Jag2	17.1	16.28	28.44	15.14	15.41	34.68	2.21	0.43	6.02	0	0.32	1.51	0	0	3.21	11.21	0	0	0	58.71	64.87	11.69	36.43	29.22	15.97	6.03	0	0	8.49	3.16	2.5	19.08	0	14.58	2.46	6.99	3.73	0	16450	ENSMUSG00000002799	Jag2	jagged 2
Btbd6	38.05	40.71	54.99	17.11	45.32	31.43	40.56	55.94	27.11	37.94	20.21	21.71	0	0	115.67	92.45	99.94	63.34	39.6	53.12	90.32	84.04	74.68	109.57	119.02	194.81	0	31.66	16.03	22.73	17.48	28.06	9.36	27.65	28.72	26.22	23.6	21.89	399566	ENSMUSG00000002803	Btbd6	BTB (POZ) domain containing 6
Nudt14	213.98	205.41	234.64	138.23	146.83	92.11	107.67	80.66	102.41	71.23	74.11	84.14	153.32	59.32	308.45	187.69	283.55	133.02	106.61	164.96	164.14	77.46	134.78	156.01	163.29	137.91	59.7	215.3	55.64	89.67	77.39	74.07	72.54	73.89	85.34	86.53	100.61	65.95	66174	ENSMUSG00000002804	Nudt14	nudix (nucleoside diphosphate linked moiety X)-type motif 14
Epdr1	0	0	0	0	0	0	0	0	2.01	0	0	0	0	0	0	0	0	0	0	0	0	0	0	0	0	0	0	0	0	0	0.83	0	0	0	0	0	0	0	105298	ENSMUSG00000002808	Epdr1	ependymin related protein 1 (zebrafish)
Flii	906.09	887.39	890.68	546.98	463.15	345.7	568.57	324.81	430.71	874.14	719.95	926.19	478.16	319.4	343.79	630.31	525.27	275.54	593.96	517.25	547.22	393.89	462.63	460.74	328.02	374.23	1310.97	956.2	918.45	476.46	493.49	435.47	542.89	618.26	589.18	654.68	734.11	549.79	14248	ENSMUSG00000002812	Flii	flightless I actin binding protein
Top3a	28.68	30.69	17.06	34.23	33.54	55.27	133.48	60.28	114.45	20.4	26.95	36.19	67.57	4.56	0	8.4	16.27	77.59	67.01	128.61	85.28	67.23	127.5	63.14	57.33	77.66	2.49	88.65	90.53	32.21	60.75	50.51	23.4	49.76	39.39	41.08	39.75	47.71	21975	ENSMUSG00000002814	Top3a	topoisomerase (DNA) III alpha
Atg4d	62.87	88.3	60.2	80.3	34.44	37.93	53.1	61.15	20.08	40.45	61.92	41.92	168.92	0	54.62	8.4	23.24	28.5	191.89	55.92	45.58	55.54	87.43	76.18	39.91	75.65	29.85	50.66	68.84	79.25	68.24	136.93	53.82	48.25	35.29	50.7	47.2	30.59	235040	ENSMUSG00000002820	Atg4d	autophagy related 4D/ cysteine peptidase
Qtrt1	60.66	63.25	56.88	52.66	63.45	76.94	59.73	73.72	72.29	45.46	45.56	54.89	90.95	91.26	67.47	39.22	41.84	69.68	21.32	69.9	69.07	88.42	91.07	105.92	76.2	107.78	99.5	25.33	69.78	71.99	98.2	115.6	81.9	79.42	56.62	78.67	78.25	35.92	60507	ENSMUSG00000002825	Qtrt1	queuine tRNA-ribosyltransferase catalytic subunit 1
Plin4	0	0	0	0	0	0	0	0	0	3.94	0	1.21	0	0	0	0	0	0	0	0	0	0	0	0	0	0	0	0	0	0	0	0	0	0	0	0.87	0	0	57435	ENSMUSG00000002831	Plin4	perilipin 4
Hdgfl2	121.33	231.08	191.03	169.16	194.87	216.74	202.8	179.97	131.52	127.43	124.8	138.43	174.11	91.26	257.04	140.07	30.21	88.68	149.25	237.65	210.56	238.24	284.13	280.2	285.93	294.56	189.06	303.96	187.65	158.82	90.71	143.66	124.02	150.79	179.71	152.09	115.52	81.11	15193	ENSMUSG00000002833	Hdgfl2	HDGF like 2
Chaf1a	0	0	0	1.32	0	0	0	0	1	0.72	1.6	1.21	0	0	0	0	0	0	0	0	1.4	0	0	0.52	0	0	0	0	1.89	5.05	0	0	0	17.09	9.85	4.37	0	0	27221	ENSMUSG00000002835	Chaf1a	chromatin assembly factor 1/ subunit A (p150)
Adprh	486.96	358.21	544.65	213.26	410.58	451.9	238.19	282.75	258.02	287.08	284.58	339.59	795.21	401.53	224.91	243.72	241.72	307.21	271.09	240.45	297.24	390.97	431.67	350.12	876.67	660.76	276.12	215.3	181.05	449.94	200.56	372.62	552.25	174.92	203.51	232.5	203.71	282.61	11544	ENSMUSG00000002844	Adprh	ADP-ribosylarginine hydrolase
Tmem39a	278.5	217.31	249.33	98.08	56.19	76.94	50.88	65.92	107.43	76.25	92.08	88.67	83.16	77.57	77.11	14.01	23.24	7.92	27.41	44.74	73.26	82.58	78.32	81.92	125.55	178.08	0	0	23.57	24.31	34.12	12.35	63.18	53.78	45.95	31.47	23.6	54.45	67846	ENSMUSG00000002845	Tmem39a	transmembrane protein 39a
Timmdc1	11.58	12.52	1.42	7.9	12.69	16.26	16.22	21.68	8.03	18.26	11.55	4.22	2.6	73.01	19.28	0	6.97	11.08	0	0	22.37	13.15	30.96	20.87	3.63	7.36	0	0	0	5.05	9.15	0	25.74	15.08	16.41	20.98	7.45	4.21	76916	ENSMUSG00000002846	Timmdc1	translocase of inner mitochondrial membrane domain containing 1
Pla1a	4.96	8.14	3.79	6.58	0.91	0	0	0	0	4.65	9.63	14.78	0	0	0	0	0	0	0	0	0.56	0.73	0	0	0	0.67	0	0	0	0	0	0	2.34	0.5	2.46	1.75	0	3.09	85031	ENSMUSG00000002847	Pla1a	phospholipase A1 member A
Mcm2	25.37	16.28	18.01	29.62	36.25	48.77	64.16	33.39	37.15	100.94	64.17	69.06	98.75	41.07	16.06	19.61	76.7	14.25	0	5.59	27.96	19.73	20.04	29.74	10.16	20.08	0	3.17	27.35	24.94	29.96	34.79	35.1	31.67	49.24	41.08	26.08	70.72	17216	ENSMUSG00000002870	Mcm2	minichromosome maintenance complex component 2
Tpra1	160.48	195.39	159.27	408.76	432.34	313.19	1421.05	1029.08	820.26	195.45	208.86	193.92	275.46	118.63	347	126.06	320.74	356.3	213.22	615.11	565.4	666.47	861.51	643.36	594.36	548.29	544.79	699.74	386.62	437.63	409.44	625.14	332.29	353.36	342.19	365.36	376.37	255.95	24100	ENSMUSG00000002871	Tpra1	transmembrane protein/ adipocyte asscociated 1
Nab1	202.95	284.94	274.46	105.97	104.23	76.94	79.64	92.37	74.3	100.94	96.89	124.56	179.31	118.63	57.83	145.67	92.97	83.93	94.42	36.35	27.68	41.65	43.71	32.35	28.3	36.15	69.65	56.99	59.41	109.25	58.25	59.48	102.96	111.09	102.57	114.5	94.4	174	17936	ENSMUSG00000002881	Nab1	Ngfi-A binding protein 1
Adgre5	47.43	45.09	60.67	1016.96	1198.22	1167.15	1294.21	1755.9	2162.59	45.82	52.3	50.37	683.46	775.68	298.81	725.56	429.98	760.1	1873.26	5.59	1.96	0	0	5.74	17.42	21.42	1174.15	1450.14	1339.02	1385.5	1210.01	1663.31	2295.58	1196.81	833.72	1421.24	1275.68	747.08	26364	ENSMUSG00000002885	Adgre5	adhesion G protein-coupled receptor E5
Il17ra	296.15	274.3	276.83	182.33	259.22	230.83	202.8	195.15	300.19	843.71	707.12	1077.28	171.52	611.42	424.11	193.3	155.72	204.28	237.58	1425.93	789.65	874.75	1105.58	660.58	1067.53	1179.59	191.55	322.96	348.9	304.07	234.68	173.96	479.71	175.42	134.58	194.04	144.09	152.95	16172	ENSMUSG00000002897	Il17ra	interleukin 17 receptor A
Lamb1	3.31	0	0	7.24	42.6	1.08	0	0	0	0.36	0	0.3	0	0	0	0	0	0	0	0	0	0	0	0	0	0	0	0	0	0	0	0	18.72	2.51	6.56	4.37	1.24	9.82	16777	ENSMUSG00000002900	Lamb1	laminin B1
Kcnn1	12.13	0	4.27	0.66	0.91	0	1.47	0	0	0	0	0	0	0	0	0	0	1.58	0	0	1.68	0.73	0	3.13	0	0	7.46	0	6.6	5.05	0	4.49	28.08	7.04	3.28	2.62	3.73	3.65	84036	ENSMUSG00000002908	Kcnn1	potassium intermediate/small conductance calcium-activated channel/ subfamily N/ member 1
Arrdc2	38.05	97.69	59.73	73.06	126.89	57.44	134.95	127.93	98.39	46.53	41.39	28.95	38.98	255.52	131.73	81.24	62.75	136.18	210.17	41.94	51.73	86.96	118.39	81.92	29.03	43.51	104.48	75.99	178.22	87.46	203.89	54.99	128.7	128.68	152.63	134.61	98.13	87.56	70807	ENSMUSG00000002910	Arrdc2	arrestin domain containing 2
Cd36	6.62	4.38	1.42	85.57	66.16	15.17	12.54	31.22	17.07	518.68	424.79	288.92	15.59	13.69	240.97	238.12	276.58	771.19	383.79	0	0.28	0	0	4.7	3.63	3.35	639.32	136.15	842.07	1672.52	1345.65	1236.82	271.44	270.93	193.66	416.06	324.2	724.63	12491	ENSMUSG00000002944	Cd36	CD36 molecule
Map2k7	167.65	259.27	241.75	231.69	133.24	283.93	327.42	217.7	132.53	162.16	157.85	208.4	446.98	529.29	176.71	495.84	213.83	218.53	146.21	374.66	283.54	152.73	171.21	173.23	152.4	127.2	273.64	405.28	391.33	282.28	400.28	323.23	152.1	322.2	259.31	260.47	252.15	205.99	26400	ENSMUSG00000002948	Map2k7	mitogen-activated protein kinase kinase 7
Timm44	69.49	53.86	63.52	134.28	87.92	79.11	132	73.72	41.16	81.97	85.34	88.97	77.96	73.01	118.88	95.25	34.86	49.09	70.06	243.25	182.31	160.77	167.57	182.1	76.2	88.37	206.47	189.97	128.24	84.62	91.54	129.07	67.86	107.06	145.24	80.41	121.73	80.83	21856	ENSMUSG00000002949	Timm44	translocase of inner mitochondrial membrane 44
Ap2a2	62.32	64.5	81.53	219.85	271.91	165.81	282.44	361.24	254.01	186.14	262.76	232.53	85.76	18.25	102.82	103.65	132.48	175.77	295.46	192.92	121.36	105.96	56.46	95.49	86.36	119.16	651.75	921.38	1626.63	760.95	922.9	704.83	512.47	551.41	510.41	657.3	801.18	512.74	11772	ENSMUSG00000002957	Ap2a2	adaptor-related protein complex 2/ alpha 2 subunit
Pnkp	232.73	175.35	133.67	146.78	146.83	222.16	187.31	188.64	81.32	186.5	204.05	170.7	153.32	141.45	302.02	173.69	104.59	199.53	243.68	246.04	154.63	189.27	225.85	221.76	281.58	170.71	74.63	424.28	137.67	166.4	232.18	249.16	154.44	147.78	63.19	148.59	106.82	55.57	59047	ENSMUSG00000002963	Pnkp	polynucleotide kinase 3'- phosphatase
Med25	141.18	349.45	171.6	454.17	176.74	231.91	200.58	187.78	71.28	294.24	281.37	272.64	249.48	237.27	138.16	78.44	202.21	166.27	255.86	573.17	436.77	365.39	369.74	398.64	172.72	309.96	263.69	199.47	246.12	258.91	310.41	312.01	154.44	323.71	338.9	377.6	377.61	229.85	75613	ENSMUSG00000002968	Med25	mediator complex subunit 25
Bcam	19.85	16.28	6.16	22.38	5.44	0	0.74	0.43	0	48.32	36.25	50.37	10.39	0	61.05	25.21	16.27	0	0	5.59	0	2.19	0	0.52	0	0	0	180.48	31.12	18	19.97	87.54	7.02	10.05	5.74	8.74	16.15	2.81	57278	ENSMUSG00000002980	Bcam	basal cell adhesion molecule
Clptm1	274.64	479.08	308.59	787.24	484.91	363.04	704.99	366.45	367.46	462.13	813.96	807.06	506.75	428.91	356.64	498.65	416.04	400.64	721.89	1227.42	1063.12	1292.75	1480.78	1153.67	502.92	907.79	477.62	1003.7	624.25	401	619.98	615.04	346.33	673.55	540.77	674.78	672	688.71	56457	ENSMUSG00000002981	Clptm1	cleft lip and palate associated transmembrane protein 1
Relb	612.7	583.03	610.54	181.01	251.97	231.91	171.09	120.56	97.39	99.87	150.79	247.61	192.3	36.5	54.62	114.86	76.7	71.26	240.63	125.82	63.47	55.54	107.46	96.01	52.25	59.58	74.63	19	176.34	159.14	129.82	142.54	142.74	121.14	91.09	126.74	94.4	58.09	19698	ENSMUSG00000002983	Relb	avian reticuloendotheliosis viral (v-rel) oncogene related B
Tomm40	264.16	283.06	239.38	331.09	278.26	407.47	272.85	253.26	193.77	306.41	369.6	479.23	649.68	483.66	430.54	198.9	171.99	441.81	383.79	534.02	444.04	377.08	377.03	385.6	331.65	364.19	412.94	88.65	202.74	244.39	381.14	332.21	301.86	190.5	256.02	270.96	170.17	167.27	53333	ENSMUSG00000002984	Tomm40	translocase of outer mitochondrial membrane 40
Apoe	4220.5	3064.85	3246.56	165878	286231	176909	42482.5	42626.9	23637.9	362.61	359.98	490.99	3996.82	3111.85	367533	237627	189268	219536	236061	25993.8	7620.26	4449.73	4229.24	6292.2	7335.57	4271.16	91633.5	158087	134721	143730	122237	137917	216945	220461	196175	201283	240685	158423	11816	ENSMUSG00000002985	Apoe	apolipoprotein E
Apoc2	0.55	6.89	0	244.2	355.3	219.99	89.97	70.69	65.26	5.01	12.83	5.13	0	0	240.97	187.69	60.43	152.02	173.62	13.98	0.84	6.58	5.46	4.17	11.61	4.02	22.39	0	63.18	83.99	67.41	33.67	224.64	95	48.41	26.22	50.93	38.17	11813	ENSMUSG00000002992	Apoc2	apolipoprotein C-II
Hbp1	336.4	306.23	450.32	240.91	271	281.76	296.45	438	564.24	372.28	309.61	198.45	202.7	77.57	231.33	296.95	304.47	199.53	216.26	150.98	192.66	260.89	307.81	250.98	718.46	587.12	323.39	335.62	455.46	326.48	367.83	237.94	437.59	180.45	210.07	162.58	217.37	387.01	73389	ENSMUSG00000002996	Hbp1	high mobility group box transcription factor 1
Prkar2b	145.04	83.29	149.79	16.46	23.57	45.52	19.17	9.54	8.03	687.28	524.56	611.63	85.76	0	32.13	2.8	18.59	30.09	3.05	0	0.28	0.73	0	6.26	0.73	0	258.71	60.16	99.01	216.6	178.09	141.41	37.44	15.08	29.54	34.09	32.3	47.43	19088	ENSMUSG00000002997	Prkar2b	protein kinase/ cAMP dependent regulatory/ type II beta
Cdkn1b	68.38	93.94	72.05	75.7	47.13	52.02	145.28	111.02	161.64	65.51	32.08	65.45	137.73	296.58	234.55	215.71	309.12	101.35	33.51	346.7	295	118.39	72.86	69.4	54.43	30.8	22.39	82.32	12.26	71.99	72.4	53.87	191.88	261.38	240.43	205.41	234.76	135.27	12576	ENSMUSG00000003031	Cdkn1b	cyclin-dependent kinase inhibitor 1B
Klf4	447.8	223.57	209.04	1194.02	484.91	454.07	48.67	37.3	45.18	1178.4	729.58	1051.65	311.85	150.57	555.85	459.43	316.09	674.59	673.15	53.12	60.12	13.88	20.04	60.01	28.3	52.22	1746.3	2067.55	1749.21	2466.94	2345.12	2611.69	2592.76	3107.88	2799.03	3456.09	3743.82	3565.62	16600	ENSMUSG00000003032	Klf4	Kruppel-like factor 4 (gut)
Ap1m1	304.97	330.03	278.25	208	234.75	200.49	317.84	245.45	198.79	384.09	451.74	357.99	420.99	191.64	195.99	148.47	192.91	129.85	347.24	355.08	223.7	348.58	387.95	379.34	269.97	269.12	880.61	376.78	360.22	321.43	392.79	448.94	308.88	322.7	258.49	319.91	296.87	231.25	11767	ENSMUSG00000003033	Ap1m1	adaptor-related protein complex AP-1/ mu subunit 1
Rab8a	349.09	318.76	448.42	431.79	387.93	445.4	325.21	303.56	288.14	655.42	620.49	666.82	483.36	501.91	363.07	257.73	323.07	292.96	255.86	125.82	176.44	217.04	295.06	229.59	372.29	287.2	109.45	436.94	329.1	310.06	257.98	413.02	587.35	271.43	338.9	241.24	270.79	296.64	17274	ENSMUSG00000003037	Rab8a	RAB8A/ member RAS oncogene family
Hmgn2	57.35	33.82	47.88	17.11	17.22	30.34	11.8	20.38	23.09	62.28	46.52	35.89	51.97	77.57	28.92	22.41	27.89	20.59	51.78	50.33	17.9	9.5	16.39	19.31	6.53	10.04	2.49	37.99	31.12	47.36	65.74	29.18	16.38	37.2	26.26	24.47	14.91	20.21	15331	ENSMUSG00000003038	Hmgn2	high mobility group nucleosomal binding domain 2
Fam32a	165.44	206.03	182.97	248.15	238.37	266.59	202.06	171.3	280.11	234.82	276.88	255.75	252.08	219.02	154.22	238.12	199.88	112.43	167.53	268.41	196.01	199.5	167.57	180.02	216.26	231.63	64.68	288.13	351.73	216.92	169.77	222.22	257.4	214.63	160.01	266.59	221.1	216.94	67922	ENSMUSG00000003039	Fam32a	family with sequence similarity 32/ member A
Elf3	0	0	1.42	275.8	116.02	72.61	0	1.73	0	0	0	1.51	0	0	51.41	0	0	0	0	0	0.56	0	0	0	1.45	0	0	0	0	0	0	0	0	0	0.82	0	0	0	13710	ENSMUSG00000003051	Elf3	E74-like factor 3
Stard3nl	92.65	25.05	108.55	185.62	125.99	109.45	128.31	115.35	200.8	148.91	126.09	115.51	158.52	292.02	247.4	179.29	216.15	121.93	124.88	162.16	280.46	252.85	285.96	214.98	127	153.31	611.95	991.03	239.51	321.12	133.15	138.05	397.81	189	147.71	311.17	198.74	445.39	76205	ENSMUSG00000003062	Stard3nl	STARD3 N-terminal like
Stk11	634.76	613.09	876.46	294.23	358.92	355.45	234.51	355.17	284.13	250.21	396.87	342.91	366.42	588.6	433.75	243.72	246.37	259.7	855.91	248.84	181.19	192.93	211.28	220.19	307.7	268.45	271.15	402.11	460.17	282.28	251.32	241.3	451.63	213.63	275.72	288.44	214.89	244.44	20869	ENSMUSG00000003068	Stk11	serine/threonine kinase 11
Efna2	9.38	11.9	4.74	3.95	0	1.08	0	3.04	0	7.88	7.7	4.83	5.2	45.63	0	0	0	0	0	0	0.28	0.73	1.82	0.52	2.9	0	0	34.83	12.26	8.21	4.16	0	4.68	1.01	1.64	16.61	14.91	2.81	13637	ENSMUSG00000003070	Efna2	ephrin A2
Atp5d	3038.12	2884.49	3426.22	3313.5	1781.01	1880.23	1548.62	1123.62	614.44	2418.01	2969.65	2803.29	3669.38	1998.52	3216.2	2019.8	1719.92	2386.4	3886.63	1476.26	1092.48	1503.95	1519.03	1507.44	1044.31	1018.92	1549.78	2010.56	1466.32	1799.13	2174.52	2645.36	2726.14	2858.06	2405.15	2693.02	2476.83	1935.34	66043	ENSMUSG00000003072	Atp5d	ATP synthase/ H+ transporting/ mitochondrial F1 complex/ delta subunit
Ppp5c	147.8	216.68	155.48	423.9	455	247.08	1009.56	720.31	438.74	319.66	360.94	341.7	187.11	406.09	237.76	238.12	118.54	178.94	438.62	771.68	704.65	843.32	810.51	907.38	442.69	961.35	106.97	272.3	416.79	213.76	282.11	331.09	360.37	416.19	527.64	637.2	506.79	315.73	19060	ENSMUSG00000003099	Ppp5c	protein phosphatase 5/ catalytic subunit
Cdk12	66.73	81.41	63.04	93.47	82.48	57.44	99.55	65.05	126.5	108.46	77.96	105.86	85.76	351.34	83.54	100.85	106.91	148.85	57.87	296.37	215.87	121.31	138.42	84.01	66.04	28.12	184.08	94.99	127.3	138.61	148.96	112.23	58.5	118.12	144.42	109.26	116.76	153.23	69131	ENSMUSG00000003119	Cdk12	cyclin-dependent kinase 12
Lipe	458.28	524.79	611.01	192.86	269.19	252.5	110.62	183.44	123.49	33.29	35.61	40.11	291.06	844.12	305.23	134.47	53.46	182.11	255.86	173.35	193.5	206.08	202.17	176.36	244.57	374.23	87.07	243.8	164.08	94.41	143.97	202.02	105.3	86.46	123.91	76.04	59.62	90.93	16890	ENSMUSG00000003123	Lipe	lipase/ hormone sensitive
Pafah1b2	99.82	184.12	124.19	146.78	105.14	147.38	166.66	152.65	165.66	271.69	248.33	255.75	111.74	141.45	77.11	33.62	62.75	64.93	124.88	83.88	127.79	154.2	136.6	131.49	134.98	126.53	126.87	82.32	161.25	109.56	153.96	131.31	51.48	98.52	82.06	147.72	96.89	179.89	18475	ENSMUSG00000003131	Pafah1b2	platelet-activating factor acetylhydrolase/ isoform 1b/ subunit 2
Tbc1d8	23.16	43.84	45.98	162.58	344.42	268.76	109.14	219.87	203.81	1.79	1.93	1.81	135.13	109.51	54.62	145.67	99.94	98.18	63.96	72.69	74.66	79.66	65.57	60.01	112.49	127.2	4.98	28.5	52.81	36.94	13.32	12.35	131.04	42.73	64.01	34.09	42.23	57.81	54610	ENSMUSG00000003134	Tbc1d8	TBC1 domain family/ member 8
Cnot11	50.74	35.7	60.2	67.8	65.26	60.69	45.72	81.53	86.34	61.93	80.21	80.83	158.52	196.2	38.56	64.43	192.91	115.6	24.37	114.63	98.71	91.35	107.46	90.27	88.54	113.81	62.19	351.45	83.92	82.73	130.65	99.89	70.2	61.32	76.31	61.19	64.59	74.93	52846	ENSMUSG00000003135	Cnot11	CCR4-NOT transcription complex/ subunit 11
Slc2a3	13.24	8.14	15.64	15.14	10.88	15.17	6.64	9.97	6.02	6.44	14.44	4.83	31.18	4.56	167.08	36.42	34.86	26.92	0	11.18	19.29	15.35	12.75	20.87	52.98	30.8	29.85	22.16	9.43	7.26	9.15	5.61	30.42	16.59	27.9	27.1	4.97	42.66	20527	ENSMUSG00000003153	Slc2a3	solute carrier family 2 (facilitated glucose transporter)/ member 3
Foxj2	47.98	35.07	49.77	77.67	84.29	86.7	43.51	25.15	75.3	70.88	58.39	56.4	96.15	95.82	144.58	72.84	62.75	63.34	103.56	33.55	58.16	59.92	65.57	57.4	66.04	49.54	79.6	180.48	50.92	67.57	54.92	37.04	42.12	27.14	29.54	41.96	37.26	46.59	60611	ENSMUSG00000003154	Foxj2	forkhead box J2
Sri	736.23	380.76	760.8	914.93	721.47	1067.45	387.16	402.87	561.23	994.41	927.53	1026.62	808.2	885.19	649.02	588.29	755.37	568.49	609.19	195.72	180.64	195.12	203.99	235.32	320.77	271.8	768.67	1098.68	601.62	716.75	460.2	544.34	870.49	436.8	493.17	573.39	536.61	683.94	109552	ENSMUSG00000003161	Sri	sorcin
Dgcr2	84.93	141.53	135.1	130.33	122.36	121.37	179.2	196.45	238.95	99.15	95.29	98.92	101.35	50.19	86.75	126.06	95.29	49.09	36.55	92.27	156.59	203.89	207.64	152.88	322.22	249.71	106.97	107.65	205.57	97.57	105.69	101.01	135.72	126.16	98.47	113.63	121.73	111.14	13356	ENSMUSG00000003166	Dgcr2	DiGeorge syndrome critical region gene 2
NA	12.68	5.64	2.84	0	0	0	18.44	8.24	3.01	10.38	5.45	6.33	0	0	0	16.81	0	0	12.18	39.14	19.85	8.77	3.64	2.61	4.35	0	0	0	0	0	1.66	0	0	2.51	0	2.62	0	0	NA	ENSMUSG00000003178	NA	NA
Irf3	404.79	534.19	491.08	507.49	621.77	544.02	775.79	787.97	537.13	330.04	489.59	423.13	800.4	438.03	533.36	386.59	536.89	551.07	676.2	360.68	527.09	704.47	868.8	667.36	756.2	771.89	420.41	899.21	653.48	471.73	535.93	515.15	634.15	407.15	423.42	355.75	406.18	391.78	54131	ENSMUSG00000003184	Irf3	interferon regulatory factor 3
Bcl2l12	45.22	22.54	52.14	28.96	54.38	45.52	43.51	38.16	30.12	22.55	30.16	19.9	10.39	45.63	64.26	14.01	69.73	23.75	18.28	8.39	22.65	32.89	30.96	43.31	70.39	44.85	0	9.5	80.15	57.47	26.63	48.26	37.44	24.13	29.54	16.61	9.94	17.12	75736	ENSMUSG00000003190	Bcl2l12	BCL2-like 12 (proline rich)
Zfp959	0	8.14	0.47	2.63	0	0	2.21	3.04	0	0.36	0.64	0.3	7.8	0	16.06	0	0	4.75	0	2.8	6.99	11.69	3.64	1.57	2.18	1.34	0	0	1.89	9.79	14.98	3.37	2.34	11.06	6.56	1.75	1.24	3.65	224893	ENSMUSG00000003198	Zfp959	zinc finger protein 959
Mpnd	111.95	85.8	76.32	196.15	170.4	152.8	225.66	131.4	107.43	141.39	192.5	186.68	153.32	365.03	131.73	126.06	137.13	161.52	499.54	176.14	131.14	152	171.21	130.45	129.9	103.77	527.37	164.64	457.34	332.17	513.46	378.23	194.22	325.21	239.61	363.61	340.35	179.33	68047	ENSMUSG00000003199	Mpnd	MPN domain containing
Sh3gl1	165.44	84.54	164.01	109.27	213.9	163.64	274.33	348.23	339.35	101.3	97.53	113.1	140.33	146.01	202.42	95.25	202.21	243.87	134.02	260.02	211.67	162.96	173.03	202.45	390.44	315.99	753.74	1332.99	673.28	525.72	471.02	476.99	386.11	120.64	142.78	271.84	190.05	204.31	20405	ENSMUSG00000003200	Sh3gl1	SH3-domain GRB2-like 1
Ebi3	252.58	285.57	301.95	746.43	756.82	546.19	710.15	318.31	175.7	34.01	32.4	18.7	519.74	406.09	366.28	226.91	276.58	389.55	155.34	623.49	405.73	458.2	708.52	444.56	163.29	265.78	124.38	151.98	219.71	383.95	196.4	225.59	531.19	555.93	441.48	351.38	421.09	344.92	50498	ENSMUSG00000003206	Ebi3	Epstein-Barr virus induced gene 3
Yju2	34.19	41.96	53.09	26.33	21.75	35.76	27.29	22.12	22.09	10.74	15.72	16.29	49.38	45.63	6.43	30.82	44.16	28.5	103.56	69.9	57.04	56.27	34.61	40.18	10.89	30.13	44.78	22.16	50.92	78.31	57.42	106.62	72.54	42.73	27.9	21.85	40.99	42.94	72886	ENSMUSG00000003208	Yju2	YJU2 splicing factor
Ranbp2	34.19	140.91	37.92	115.85	39.88	23.84	137.16	116.22	70.28	76.6	85.98	60.92	18.19	0	19.28	50.42	130.16	55.42	12.18	170.55	94.51	63.58	81.96	63.14	26.85	45.52	99.5	0	22.63	54.62	47.43	23.57	11.7	92.99	88.62	83.04	88.19	90.37	19386	ENSMUSG00000003226	Ranbp2	RAN binding protein 2
Edar	0	0	0	0	0	0	0	0	0	0	0	0	0	0	0	0	0	0	0	0	0	0	0	0	0	0	0	0	0	0.32	0	0	0	0	0	0	0	0	13608	ENSMUSG00000003227	Edar	ectodysplasin-A receptor
Grk5	8.27	1.25	4.74	6.58	19.03	7.59	13.27	9.97	9.04	63.36	59.03	83.24	0	0	0	0	32.54	7.92	0	2.8	5.59	5.12	0	3.13	5.81	8.7	47.26	0	22.63	29.68	13.32	7.86	18.72	26.64	16.41	13.11	26.08	50.24	14773	ENSMUSG00000003228	Grk5	G protein-coupled receptor kinase 5
Dvl3	6.62	6.89	7.58	11.19	2.72	7.59	11.06	12.14	28.11	2.86	4.49	8.44	28.59	41.07	0	5.6	0	0	0	19.57	42.5	30.69	23.68	19.83	13.79	3.35	0	25.33	10.37	18.94	21.64	1.12	0	13.07	22.98	7.87	6.21	4.49	13544	ENSMUSG00000003233	Dvl3	dishevelled segment polarity protein 3
Abcf3	78.86	104.58	81.06	76.35	93.36	52.02	150.44	120.99	119.47	74.81	122.56	128.18	77.96	209.89	67.47	11.21	99.94	137.77	109.65	106.25	93.95	151.27	185.78	133.58	87.81	104.44	79.6	164.64	83.92	72.94	95.7	150.39	14.04	80.42	71.39	73.42	83.22	74.93	27406	ENSMUSG00000003234	Abcf3	ATP-binding cassette/ sub-family F (GCN20)/ member 3
Eif2b5	86.58	139.65	102.39	94.78	105.14	139.8	174.77	111.02	166.66	111.33	153.68	95.3	148.13	191.64	67.47	114.86	86	57.01	112.7	125.82	122.75	108.16	140.25	125.75	81.28	139.92	24.88	19	132.02	56.2	53.26	71.83	37.44	103.04	95.19	79.54	96.89	70.72	224045	ENSMUSG00000003235	Eif2b5	eukaryotic translation initiation factor 2B/ subunit 5 epsilon
Cyth2	485.86	449.02	519.53	175.09	192.15	172.31	179.2	143.11	133.53	177.91	239.02	234.03	181.91	127.76	89.96	151.27	132.48	112.43	322.87	173.35	186.79	194.39	214.92	252.54	243.12	236.99	141.79	98.15	319.67	196.71	170.6	271.61	226.98	198.04	142.78	145.97	195.02	146.5	19158	ENSMUSG00000003269	Cyth2	cytohesin 2
Sult2b1	95.96	56.36	74.9	54.63	10.88	28.18	2.21	0	0	64.07	91.44	101.33	51.97	0	0	0	13.95	0	0	0	0.56	2.19	0	5.22	5.81	2.01	0	0	0	25.26	10.82	0	0	0.5	0	3.5	2.48	0.28	54200	ENSMUSG00000003271	Sult2b1	sulfotransferase family/ cytosolic/ 2B/ member 1
Car11	3.31	0	0	20.4	29	24.93	5.9	4.77	0	6.09	4.17	9.35	28.59	0	3.21	0	0	0	0	13.98	4.19	24.12	7.29	10.96	24.67	13.39	34.83	9.5	89.58	16.73	71.57	71.83	9.36	21.61	19.69	10.49	19.87	7.58	12348	ENSMUSG00000003273	Car11	carbonic anhydrase 11
Dlgap1	2.21	0	4.74	2.63	2.72	1.08	4.42	0.43	9.04	0.72	0	0.3	0	0	0	0	18.59	0	0	0	0.84	0	7.29	1.04	4.35	0	0	0	0	0	0	0	0	1.01	0	0	0	0.56	224997	ENSMUSG00000003279	Dlgap1	DLG associated protein 1
Plag1	10.48	11.9	5.21	1.97	0	0	0	0	1	1.43	0	0	0	0	0	0	0	0	0	2.8	1.68	0	0	1.04	0	3.35	17.41	0	0	0.95	3.33	0	0	6.03	1.64	0	0	1.12	56711	ENSMUSG00000003282	Plag1	pleiomorphic adenoma gene 1
Hck	232.17	309.99	364.05	1250.62	1356.83	1266.85	1822.21	1545.58	1949.74	776.77	676.64	775.09	327.44	287.46	957.47	927.26	1006.39	722.1	727.98	685	919.68	1032.6	1185.72	1034.7	1035.6	1100.59	216.42	174.14	330.04	190.71	188.08	270.48	559.27	518.73	621.19	383.72	493.13	379.15	15162	ENSMUSG00000003283	Hck	hemopoietic cell kinase
Mrpl4	307.18	267.41	299.11	227.09	185.81	202.65	294.24	292.29	166.66	306.77	316.34	441.23	311.85	91.26	311.66	238.12	153.4	313.54	496.49	248.84	200.77	228.73	191.24	294.29	199.57	230.96	181.6	360.95	217.83	319.85	318.73	308.64	283.14	178.94	181.35	191.42	182.59	136.96	66163	ENSMUSG00000003299	Mrpl4	mitochondrial ribosomal protein L4
Keap1	70.59	135.27	92.91	195.49	221.15	293.68	469.75	323.95	303.2	169.31	163.95	173.72	101.35	255.52	218.48	288.54	278.91	277.12	377.7	374.66	355.12	310.58	349.7	306.29	227.15	174.06	373.14	240.63	281.95	238.39	189.74	237.94	166.14	367.44	299.51	303.3	346.56	197.01	50868	ENSMUSG00000003308	Keap1	kelch-like ECH-associated protein 1
Ap1m2	23.16	8.77	5.21	119.8	20.85	57.44	0	3.47	0	1.43	0.96	0.9	5.2	0	0	0	0	23.75	0	0	0	0.73	0	0	0	0	0	0	0	0	0	0	0	0.5	0.82	0	0	0	11768	ENSMUSG00000003309	Ap1m2	adaptor protein complex AP-1/ mu 2 subunit
Glg1	413.61	450.27	428.99	464.71	589.14	681.65	1179.9	2341.78	2885.46	490.05	285.22	452.99	485.96	967.32	748.63	910.45	1055.2	745.85	944.24	1255.38	1531.49	785.59	794.12	624.05	556.63	422.43	1733.86	1048.02	653.48	770.74	1010.28	673.4	884.53	1068.13	1074.97	990.33	967.63	471.49	20340	ENSMUSG00000003316	Glg1	golgi apparatus protein 1
Atp8b3	0	0	0	0	0	0	0	0	0	0	0.96	0	0	0	0	0	0	0	0	0	0	0	0	0	0	0	0	0	0	0	0.83	0	0	0	0	0	0	0	67331	ENSMUSG00000003341	Atp8b3	ATPase/ class I/ type 8B/ member 3
Btbd2	15.44	8.14	10.9	23.04	65.26	59.6	56.05	60.71	44.18	43.67	84.7	85.35	88.36	114.07	237.76	243.72	23.24	72.84	112.7	58.71	79.69	39.46	83.78	55.31	89.26	87.03	149.26	462.27	137.67	170.5	152.29	114.48	166.14	39.71	96.01	85.66	81.98	93.74	208198	ENSMUSG00000003344	Btbd2	BTB (POZ) domain containing 2
Csnk1g2	497.44	511.64	567.4	280.4	374.33	342.45	419.6	367.75	357.42	460.69	503.07	591.12	353.42	707.24	141.37	86.84	76.7	259.7	316.78	304.76	301.15	285.74	346.06	301.59	236.58	311.97	164.18	183.64	353.61	236.5	334.54	254.77	112.32	154.31	179.71	152.09	166.45	151.55	103236	ENSMUSG00000003345	Csnk1g2	casein kinase 1/ gamma 2
Abhd17a	1088.63	1226.19	832.38	313.31	542.01	651.31	379.78	450.58	490.95	409.86	358.69	417.1	504.15	588.6	388.77	327.76	306.8	633.42	992.98	452.94	338.62	342.01	322.38	344.9	478.25	547.62	189.06	443.27	382.85	398.16	510.13	713.81	704.35	463.94	400.45	375.85	474.5	208.8	216169	ENSMUSG00000003346	Abhd17a	abhydrolase domain containing 17A
Mob3a	113.05	190.38	141.73	233.01	242	272.01	182.15	131.4	159.63	315.72	373.13	335.07	1081.06	269.21	350.22	529.46	553.16	505.15	526.95	251.63	250.26	295.97	275.03	249.93	225.7	301.26	233.84	367.28	202.74	239.34	276.29	315.38	435.25	483.05	585.08	416.93	395	299.73	208228	ENSMUSG00000003348	Mob3a	MOB kinase activator 3A
Cacnb3	8.27	13.15	21.8	20.4	18.13	39.01	0	0	2.01	0	1.28	0.9	20.79	0	0	0	0	0	0	0	0.28	2.92	5.46	0	0	0	0	0	0.94	2.53	5.83	5.61	2.34	1.01	4.92	0.87	6.21	7.86	12297	ENSMUSG00000003352	Cacnb3	calcium channel/ voltage-dependent/ beta 3 subunit
Ccdc65	0	0	0	0	0	0	0.74	0	0	1.07	0	0	0	0	0	0	0	0	0	0	0	0	0	0	0	0	0	0	0	0	0	0	0	0	0	0	0	0	105833	ENSMUSG00000003354	Ccdc65	coiled-coil domain containing 65
Fkbp11	9.38	5.64	6.16	71.09	38.07	94.28	1.47	2.6	0	23.27	28.23	22.62	2.6	0	22.49	0	0	0	0	8.39	8.67	3.65	0	7.3	22.5	6.03	17.41	0	6.6	8.21	0	0	32.76	9.05	1.64	2.62	4.97	3.37	66120	ENSMUSG00000003355	Fkbp11	FK506 binding protein 11
Ddx23	6.62	15.03	14.69	21.72	6.34	4.33	42.77	15.61	0	33.65	18.61	19.3	18.19	9.13	67.47	109.25	123.18	102.93	0	212.49	177.84	67.96	78.32	54.79	8.71	14.73	141.79	94.99	13.2	22.1	10.82	42.65	32.76	88.47	86.98	88.28	85.71	31.71	74351	ENSMUSG00000003360	Ddx23	DEAD (Asp-Glu-Ala-Asp) box polypeptide 23
Pld3	264.16	284.94	210.94	993.26	644.43	729.33	7565.4	4728.23	4154.5	4998.9	5816.09	6224.23	36.38	150.57	745.41	722.76	446.25	638.17	938.15	1266.56	884.44	1062.56	954.4	998.7	439.79	694.23	885.59	873.88	1113.65	729.38	798.07	773.29	322.92	498.63	356.96	529.69	617.34	571.96	18807	ENSMUSG00000003363	Pld3	phospholipase D family/ member 3
Grik5	61.21	107.71	49.3	22.38	9.06	9.75	11.06	2.6	8.03	6.44	1.28	5.13	0	63.88	0	0	0	3.17	0	11.18	21.53	19	18.21	10.96	7.26	6.69	4.98	0	0	2.53	3.33	7.86	0	7.54	6.56	12.24	2.48	5.05	14809	ENSMUSG00000003378	Grik5	glutamate receptor/ ionotropic/ kainate 5 (gamma 2)
Cd79a	0	0	0	1.97	0	0	0.74	1.73	0	1.07	0	0.3	0	0	0	0	2.32	0	0	0	0	0	0	0	1.45	0	0	0	0	0	0	0	0	11.56	4.1	0	1.24	0	12518	ENSMUSG00000003379	Cd79a	CD79A antigen (immunoglobulin-associated alpha)
Rabac1	1160.32	1975.18	1395.51	888.6	516.63	581.95	786.85	583.71	425.69	740.26	984	1026.92	2409.01	3855.59	2669.99	2504.43	2310.27	1662.72	3374.91	2043.83	1321.77	2293.2	2085.48	1393.69	883.2	1068.46	7465.31	2852.78	2014.19	2394.32	2551.5	2699.23	1551.44	2197.08	2330.47	2575.89	2757.55	1020.99	14470	ENSMUSG00000003380	Rabac1	Rab acceptor 1 (prenylated)
Etv3	117.47	121.49	187.24	265.26	263.75	420.48	38.35	50.74	59.24	81.26	54.22	117.62	119.54	73.01	263.46	341.77	297.5	247.03	170.57	274	250.82	134.46	162.1	157.58	108.13	94.39	196.52	66.49	179.16	284.17	307.08	270.48	224.64	234.23	155.09	217.64	136.64	138.36	27049	ENSMUSG00000003382	Etv3	ets variant 3
Prkcsh	314.9	379.51	299.58	631.89	574.64	416.14	580.37	571.13	258.02	503.65	679.21	642.39	327.44	378.71	462.67	322.16	281.23	324.63	478.21	861.15	627.19	917.13	978.08	929.82	570.41	644.02	554.74	240.63	453.57	358.69	417.76	595.96	496.09	733.36	591.64	649.44	816.09	404.69	19089	ENSMUSG00000003402	Prkcsh	protein kinase C substrate 80K-H
Elavl3	0	0	0	0	0	0	0	0	0	2.86	2.25	0.9	0	0	0	0	0	0	0	0	2.24	5.12	3.64	1.57	2.18	0	0	0	0	0	0	0	0	0	0	0	2.48	0.28	15571	ENSMUSG00000003410	Elavl3	ELAV like RNA binding protein 3
Rab3b	2.76	0	5.69	4.61	0	0	0	0	0	1.07	1.28	0.3	0	0	0	0	0	9.5	0	0	1.12	0.73	0	1.04	0	0	17.41	0	0	0	0	0	0	0	5.74	0	0	4.21	69908	ENSMUSG00000003411	Rab3b	RAB3B/ member RAS oncogene family
St8sia6	5.51	3.13	0	11.19	10.88	2.17	0	0.43	0	0.36	0.64	0	23.39	0	0	11.21	0	0	9.14	86.67	26.56	43.85	61.93	21.91	28.3	12.05	0	0	0	3.79	0	0	2.34	11.56	25.44	4.37	0	1.12	241230	ENSMUSG00000003418	St8sia6	ST8 alpha-N-acetyl-neuraminide alpha-2/8-sialyltransferase 6
Fcgrt	166	165.96	124.67	1211.13	976.16	1085.87	2769.09	1920.26	1556.18	1118.26	1976.66	1998.94	639.28	301.15	501.23	338.97	341.66	1045.14	1474.24	534.02	504.16	428.97	508.16	526.48	434.71	412.39	6027.47	7744.62	8540.49	6072.47	6582.64	6069.62	3325.19	4032.75	2785.9	6191.06	7259.08	3723.9	14132	ENSMUSG00000003420	Fcgrt	Fc receptor/ IgG/ alpha chain transporter
Nosip	181.99	244.24	166.38	287.64	270.1	189.65	325.95	274.08	177.71	179.34	196.03	167.99	265.07	118.63	279.53	224.11	206.86	286.62	307.64	248.84	255.85	337.62	397.06	395.51	251.82	270.46	276.12	446.44	236.69	314.49	428.58	406.29	243.36	248.31	279	166.07	303.08	213.01	66394	ENSMUSG00000003421	Nosip	nitric oxide synthase interacting protein
Pih1d1	95.41	77.03	116.13	188.25	152.27	160.39	244.83	191.25	99.39	119.2	184.8	156.53	111.74	191.64	285.96	176.49	83.67	223.28	462.98	187.33	146.24	223.62	163.92	230.63	171.27	142.6	191.55	132.98	261.2	192.61	178.92	225.59	149.76	210.61	164.12	168.7	264.58	199.82	68845	ENSMUSG00000003423	Pih1d1	PIH1 domain containing 1
Rps11	3349.15	3958.5	2747.42	1152.55	1691.28	2209.67	1220.46	1455.37	1439.72	1277.91	1577.54	714.47	5145.45	5543.84	4864.46	7616.95	7841.92	2845.63	5351.73	992.56	862.07	929.56	582.84	643.88	697.42	715.65	6159.32	3403.71	3718.14	1877.12	3594.24	2534.24	3343.91	3389.36	3606.49	3873.89	3109.08	2421.7	27207	ENSMUSG00000003429	Rps11	ribosomal protein S11
Supt5	447.25	460.29	376.85	307.39	322.67	342.45	410.02	366.01	314.25	398.05	417.09	391.46	332.64	378.71	183.14	355.78	299.82	574.83	523.9	296.37	282.7	232.39	260.46	365.77	349.8	346.11	435.33	348.29	553.52	478.36	565.89	545.46	397.81	434.79	484.15	423.93	403.7	231.53	20924	ENSMUSG00000003435	Supt5	suppressor of Ty 5/ DSIF elongation factor subunit
Dll3	0	0	0	1.97	0	0	0	0	0	0.72	0	0	0	0	0	0	0	0	0	0	0	0	0	0.52	0	0	0	0	0	0	0	0	0	0	0	0	0	0	13389	ENSMUSG00000003436	Dll3	delta like canonical Notch ligand 3
Paf1	377.77	412.07	570.72	194.18	266.47	174.48	182.89	210.33	173.69	208.33	316.02	285	116.94	136.88	141.37	229.71	104.59	180.52	191.89	125.82	93.11	108.16	127.5	132.53	183.61	169.37	368.17	218.47	361.16	196.08	207.22	206.51	231.66	175.42	214.99	286.7	180.11	192.24	54624	ENSMUSG00000003437	Paf1	Paf1/ RNA polymerase II complex component
Timm50	239.89	294.34	141.26	180.35	163.15	152.8	176.99	137.04	109.43	138.17	219.45	150.8	218.29	182.51	340.58	72.84	116.21	209.03	332.01	438.96	211.11	290.12	415.27	232.19	115.39	170.04	62.19	202.64	191.42	151.87	198.06	299.66	252.72	306.11	248.64	257.85	337.86	165.02	66525	ENSMUSG00000003438	Timm50	translocase of inner mitochondrial membrane 50
Med29	41.36	43.21	50.25	52	54.38	31.43	28.02	16.91	13.05	36.51	54.54	59.11	36.38	91.26	138.16	84.04	51.13	57.01	112.7	33.55	32.44	32.15	23.68	49.05	23.22	18.08	84.58	6.33	57.52	28.73	34.12	59.48	25.74	26.64	26.26	24.47	31.05	24.98	67224	ENSMUSG00000003444	Med29	mediator complex subunit 29
Bicd1	8.82	7.51	14.22	2.63	6.34	7.59	0	0	0	2.15	4.17	4.52	0	0	0	0	0	0	0	0	0	0	0	0	0	0	0	0	0	0	0	0	0	1.01	0	0	0	0.28	12121	ENSMUSG00000003452	Bicd1	BICD cargo adaptor 1
Ncstn	119.67	76.4	130.83	134.28	164.05	255.75	196.16	150.91	192.77	172.89	164.91	136.92	67.57	287.46	25.7	47.62	65.08	90.26	73.1	97.86	198.53	143.23	173.03	198.28	116.84	194.81	44.78	199.47	162.19	143.35	62.41	78.56	77.22	83.94	79.6	92.65	106.82	129.38	59287	ENSMUSG00000003458	Ncstn	nicastrin
Pex19	90.99	98.32	90.54	110.58	95.17	73.69	87.76	85.87	54.22	90.56	99.46	90.48	64.97	95.82	128.52	11.21	20.92	49.09	21.32	53.12	85.28	70.89	123.85	78.79	48.62	100.42	116.92	98.15	51.86	46.73	54.92	46.02	44.46	48.25	61.54	58.56	95.64	90.37	19298	ENSMUSG00000003464	Pex19	peroxisomal biogenesis factor 19
Phyhip	8.27	3.76	3.32	0	0	0	0.74	1.73	0	0	0	0	0	0	0	0	0	0	0	0	0	2.92	0	0	0	0	0	0	0	0	0	0	0	0.5	0	0	0	0	105653	ENSMUSG00000003469	Phyhip	phytanoyl-CoA hydroxylase interacting protein
Crhr2	0	0	0	0	0	0	0	0	0	0	0	0	0	0	0	0	0	0	0	0	0.56	0.73	0	1.04	0.73	0	0	0	0	0	0	0	0	0	0	0	0	0	12922	ENSMUSG00000003476	Crhr2	corticotropin releasing hormone receptor 2
Inmt	0	0.63	0	0	0	1.08	0	0	0	4.3	8.66	8.44	0	0	0	0	0	0	0	0	0	0	0	0	0	0	29.85	0	16.97	8.84	18.31	24.69	0	5.53	0.82	0	4.97	10.95	21743	ENSMUSG00000003477	Inmt	indolethylamine N-methyltransferase
Cyp4f18	7.17	24.42	4.74	1669.91	1877.09	1283.1	50.88	52.91	37.15	674.75	1043.35	1114.68	88.36	50.19	2120.57	1165.37	922.72	1897.08	3103.82	2.8	7.27	19	5.46	12.52	13.79	35.48	985.09	636.41	1364.48	676.65	1060.21	900.12	526.51	522.25	495.64	191.42	258.37	218.62	72054	ENSMUSG00000003484	Cyp4f18	cytochrome P450/ family 4/ subfamily f/ polypeptide 18
Impdh1	348.54	636.27	368.79	91.49	49.85	108.37	313.41	163.49	71.28	161.8	210.15	241.88	231.29	118.63	83.54	44.82	41.84	17.42	130.98	13.98	17.06	13.88	16.39	23.48	21.77	14.73	74.63	91.82	176.34	195.13	199.73	138.05	93.6	96.51	106.68	187.05	111.79	143.41	23917	ENSMUSG00000003500	Impdh1	inosine monophosphate dehydrogenase 1
Dusp3	117.47	132.76	148.37	177.06	186.71	250.34	199.11	153.95	143.57	868.77	866.9	974.44	59.77	264.64	330.94	439.82	374.2	338.88	554.36	332.72	359.59	253.58	271.39	266.63	148.05	132.55	470.16	452.77	801.53	602.13	681.57	539.85	376.75	439.82	341.36	506.09	455.87	485.24	72349	ENSMUSG00000003518	Dusp3	dual specificity phosphatase 3 (vaccinia virus phosphatase VH1-related)
Prodh	15.99	15.66	18.01	38.18	23.57	36.85	36.87	53.77	37.15	16.82	22.46	16.59	70.17	0	6.43	0	2.32	64.93	63.96	16.78	23.77	43.85	30.96	31.83	37.74	30.13	79.6	53.83	15.09	11.05	34.95	22.45	21.06	14.58	23.8	19.23	6.21	8.7	19125	ENSMUSG00000003526	Prodh	proline dehydrogenase
Ess2	94.3	87.67	120.4	84.25	87.01	68.27	115.04	111.45	60.24	64.43	78.28	67.56	20.79	114.07	44.98	8.4	79.02	74.43	51.78	170.55	100.94	87.69	163.92	128.88	135.71	174.73	32.34	69.66	134.84	79.25	70.74	93.15	37.44	67.86	64.83	76.92	94.4	61.46	27886	ENSMUSG00000003527	Ess2	ess-2 splicing factor
Slc25a1	293.94	301.22	258.34	369.92	196.68	206.99	306.04	157.42	148.59	495.06	625.95	599.56	215.69	301.15	282.74	333.36	146.43	247.03	517.81	240.45	168.89	277.7	249.53	291.68	108.86	197.49	283.59	101.32	380.96	236.5	464.36	342.31	121.68	231.22	262.59	325.16	300.6	203.47	13358	ENSMUSG00000003528	Slc25a1	solute carrier family 25 (mitochondrial carrier/ citrate transporter)/ member 1
Dgcr6	93.75	129.63	55.46	50.68	40.79	31.43	54.57	31.22	30.12	54.77	79.89	74.49	70.17	141.45	86.75	72.84	62.75	3.17	91.38	55.92	65.43	60.65	61.93	52.18	29.75	46.86	136.82	120.32	94.3	58.73	97.37	88.66	91.26	25.13	55.8	87.41	75.77	64.27	13353	ENSMUSG00000003531	Dgcr6	DiGeorge syndrome critical region gene 6
Ddr1	65.07	29.43	18.96	38.18	14.5	3.25	0.74	0	0	0	0	0.3	7.8	0	0	0	2.32	1.58	0	0	1.12	0	0	0	0	0	0	0	0.94	0	4.16	0	37.44	5.53	3.28	1.75	0	0	12305	ENSMUSG00000003534	Ddr1	discoidin domain receptor family/ member 1
Ier3	1732.76	1127.24	1140.02	1097.26	1307.89	2176.08	71.53	43.8	53.21	642.89	368.96	691.25	748.43	748.3	979.96	750.77	732.13	2642.93	3317.04	44.74	49.49	54.81	85.6	101.23	88.54	53.56	4119.48	8099.24	7322.17	7084.13	6292.2	7306.44	4841.53	2739.94	1262.07	2501.6	2881.77	1688.65	15937	ENSMUSG00000003541	Ier3	immediate early response 3
Fosb	2542.89	2903.28	3312.92	1670.57	1580.71	1873.72	8.11	12.14	19.08	1829.17	1376.06	1583.35	1756.73	1729.31	703.64	935.66	753.05	709.43	1373.72	0	0	1.46	0	6.26	5.08	6.03	196.52	405.28	853.39	733.48	813.05	854.1	2372.8	2052.31	1092.2	1898.49	1694.28	1629.44	14282	ENSMUSG00000003545	Fosb	FBJ osteosarcoma oncogene B
Klc4	393.76	430.23	378.74	277.77	267.38	302.35	112.83	100.18	85.34	175.76	166.19	140.54	163.72	104.95	215.27	252.12	248.69	283.45	341.15	285.19	205.8	271.12	245.89	256.2	242.39	272.47	146.77	31.66	175.39	196.4	195.57	294.05	180.18	187.99	140.32	121.5	208.68	100.75	74764	ENSMUSG00000003546	Klc4	kinesin light chain 4
Ercc1	91.55	124.62	91.49	76.35	71.6	52.02	136.43	77.19	33.13	70.52	88.87	77.21	119.54	415.22	170.29	134.47	74.38	83.93	97.47	100.65	108.77	148.35	143.89	137.23	79.1	102.43	54.73	155.15	155.59	133.25	146.47	162.74	147.42	197.04	206.79	152.09	214.89	110.01	13870	ENSMUSG00000003549	Ercc1	excision repair cross-complementing rodent repair deficiency/ complementation group 1
Cyp17a1	0	0.63	0	0	0	0	0	0	0	0	0	0	0	0	0	0	0	0	0	0	0	0	0	0	0	0	0	0	0	0	0	0	0	3.02	0	0	0	0	13074	ENSMUSG00000003555	Cyp17a1	cytochrome P450/ family 17/ subfamily a/ polypeptide 1
As3mt	7.72	6.89	1.9	97.42	111.48	134.38	64.16	76.76	83.33	30.07	36.25	29.86	33.78	41.07	44.98	53.23	20.92	87.09	48.74	78.29	97.31	101.58	129.32	110.1	294.64	126.53	87.07	31.66	84.87	87.78	50.76	77.44	86.58	66.85	42.67	69.05	57.14	62.02	57344	ENSMUSG00000003559	As3mt	arsenic (+3 oxidation state) methyltransferase
Homer3	5.51	18.16	5.69	45.42	80.67	53.1	76.69	81.1	31.12	59.78	72.83	70.27	44.18	0	0	61.63	46.48	60.17	97.47	114.63	121.36	150.54	136.6	166.45	127.73	202.18	74.63	72.82	222.54	136.09	105.69	226.71	107.64	59.82	67.29	84.79	84.47	83.35	26558	ENSMUSG00000003573	Homer3	homer scaffolding protein 3
Crtc1	34.19	46.34	27.02	31.59	44.41	26.01	40.56	30.36	32.13	26.49	37.86	32.57	12.99	177.95	28.92	14.01	13.95	12.67	6.09	83.88	98.99	89.16	52.82	71.48	66.77	67.62	2.49	3.17	32.06	10.74	29.96	4.49	11.7	38.7	23.8	15.73	22.36	13.19	382056	ENSMUSG00000003575	Crtc1	CREB regulated transcription coactivator 1
Rnf215	223.35	246.74	286.31	158.63	236.56	198.32	167.4	228.97	186.74	102.02	111.65	136.62	80.56	155.14	147.8	75.64	118.54	114.02	73.1	369.06	433.41	385.85	316.92	376.73	466.64	463.94	97.02	37.99	122.59	168.61	173.93	242.43	117	156.32	155.09	178.31	147.81	150.43	71673	ENSMUSG00000003581	Rnf215	ring finger protein 215
Sec14l2	205.15	154.06	120.4	15.14	49.85	15.17	11.06	5.64	9.04	231.24	243.83	158.34	90.95	196.2	257.04	165.28	220.8	204.28	222.35	97.86	87.24	76	74.68	85.57	58.06	76.99	0	0	5.66	7.58	1.66	0	0	4.52	1.64	2.62	8.69	2.81	67815	ENSMUSG00000003585	Sec14l2	SEC14-like lipid binding 2
Aven	31.99	22.54	26.07	56.61	33.54	44.43	35.4	35.56	23.09	56.92	65.45	68.76	49.38	191.64	9.64	78.44	25.57	34.84	39.6	36.35	40.55	35.08	27.32	29.74	55.88	47.53	24.88	101.32	34.89	33.47	52.43	26.94	79.56	59.82	70.57	77.79	54.65	74.65	74268	ENSMUSG00000003604	Aven	apoptosis/ caspase activation inhibitor
Cp	0	0	0.47	259.34	257.41	185.31	37.61	32.52	34.14	0.72	0.96	1.81	12.99	4.56	3.21	0	16.27	31.67	0	55.92	12.3	12.42	9.11	4.7	0	4.69	151.74	34.83	152.76	181.87	263.8	120.09	226.98	213.12	381.57	354.87	313.02	810.51	12870	ENSMUSG00000003617	Cp	ceruloplasmin
Crot	33.09	60.75	31.76	40.15	44.41	41.18	42.03	67.22	69.28	49.4	44.6	40.11	5.2	0	3.21	58.83	67.4	25.34	6.09	86.67	90.6	101.58	69.21	82.96	103.05	117.16	0	0	30.18	35.36	36.62	62.85	28.08	64.84	62.36	54.19	80.74	103.28	74114	ENSMUSG00000003623	Crot	carnitine O-octanoyltransferase
Rps6ka1	269.12	221.69	222.32	660.2	774.04	827.95	381.26	364.28	279.11	693.37	486.71	566.69	751.03	1195.46	880.36	700.35	615.92	820.27	1346.31	2029.85	2229.43	1882.5	2003.52	2080.88	1732.29	2600.85	179.11	408.44	447.91	389	404.45	374.86	498.43	531.8	539.95	324.28	476.98	294.12	20111	ENSMUSG00000003644	Rps6ka1	ribosomal protein S6 kinase polypeptide 1
Calb2	0	0	0	1.97	0	0	0	0	0	0	0	0	0	0	0	0	0	0	0	0	0	2.19	0	0	0	0	0	0	0	0	0	0	0	0	0	0	0	0	12308	ENSMUSG00000003657	Calb2	calbindin 2
Snrnp200	395.96	221.69	319.96	226.43	277.35	345.7	241.88	212.93	398.58	250.57	219.13	326.92	23.39	228.14	51.41	148.47	144.1	228.03	91.38	164.96	218.66	111.08	87.43	192.54	265.61	238.33	89.55	151.98	230.08	110.2	153.12	89.79	217.62	243.28	216.64	197.54	219.86	144.81	320632	ENSMUSG00000003660	Snrnp200	small nuclear ribonucleoprotein 200 (U5)
Ciao1	186.95	165.33	216.15	142.83	182.18	216.74	101.77	165.23	238.95	128.87	140.85	158.94	46.78	73.01	67.47	61.63	44.16	104.51	106.61	69.9	104.86	179.04	134.78	146.62	301.17	316.65	77.12	50.66	162.19	173.03	69.07	134.68	278.46	126.16	118.16	107.51	151.54	147.06	26371	ENSMUSG00000003662	Ciao1	cytosolic iron-sulfur protein assembly 1
Has1	0	4.38	1.9	0	0	4.33	0	0	0	3.22	5.78	27.44	0	0	0	0	0	0	0	0	0	0	0	0.52	0	0	0	0	0	0.63	0	0	0	0	0	0.87	0	0.28	15116	ENSMUSG00000003665	Has1	hyaluronan synthase 1
Taf6l	40.26	51.98	17.54	58.58	63.45	36.85	69.32	71.12	48.19	34.72	70.58	70.27	161.12	100.38	67.47	11.21	18.59	38.01	103.56	128.61	56.76	67.96	143.89	68.35	33.38	66.28	34.83	6.33	49.98	60.62	189.74	79.69	37.44	66.35	77.96	98.77	88.19	50.24	225895	ENSMUSG00000003680	Taf6l	TATA-box binding protein associated factor 6 like
Insig2	111.4	182.86	159.27	87.54	94.26	81.28	72.27	105.81	169.67	72.31	71.55	48.25	23.39	50.19	44.98	70.03	104.59	41.17	39.6	61.51	106.26	113.27	131.14	117.4	182.88	135.9	126.87	66.49	55.64	75.78	23.3	57.24	56.16	83.44	76.31	75.17	88.19	118.71	72999	ENSMUSG00000003721	Insig2	insulin induced gene 2
Kpna6	82.72	53.86	81.06	87.54	120.55	57.44	79.64	103.65	77.31	121.35	113.25	155.92	46.78	77.57	12.85	42.02	11.62	31.67	18.28	36.35	60.96	51.89	69.21	109.57	108.13	75.65	0	69.66	63.18	50.2	38.28	35.91	35.1	35.19	41.03	25.35	27.33	51.08	16650	ENSMUSG00000003731	Kpna6	karyopherin (importin) alpha 6
Man1a	62.32	110.85	120.4	396.91	455.9	410.72	66.37	71.99	128.51	28.99	27.27	24.43	153.32	228.14	48.19	170.88	185.94	129.85	57.87	573.17	335.55	380.01	315.1	215.5	289.56	363.52	211.45	329.29	174.45	358.37	221.36	255.89	234	425.24	417.68	426.55	396.24	687.87	17155	ENSMUSG00000003746	Man1a	mannosidase 1/ alpha
Itpkc	333.1	244.24	244.12	85.57	61.63	80.19	70.06	53.34	83.33	30.43	40.75	40.41	33.78	0	70.69	11.21	11.62	71.26	48.74	86.67	81.65	111.81	174.85	94.96	139.34	133.89	39.8	164.64	105.61	86.83	63.25	101.01	250.38	74.39	36.93	47.2	43.47	46.03	233011	ENSMUSG00000003752	Itpkc	inositol 1/4/5-trisphosphate 3-kinase C
Coq8b	19.85	56.99	43.14	67.14	47.13	59.6	69.32	70.25	28.11	42.96	72.19	50.67	54.57	31.94	38.56	36.42	83.67	112.43	100.52	64.31	72.14	105.96	83.78	62.09	29.03	40.17	111.94	94.99	115.04	47.99	104.86	87.54	11.7	96.51	89.44	97.02	80.74	73.25	76889	ENSMUSG00000003762	Coq8b	coenzyme Q8B
Brd8	216.73	234.22	237.48	140.2	165.87	91.03	183.62	240.68	389.55	90.92	102.03	94.7	129.94	214.45	89.96	142.87	88.32	47.51	127.93	257.23	270.67	209	185.78	207.67	254	218.91	154.23	25.33	136.73	77.67	147.3	89.79	140.4	131.19	168.22	131.99	139.12	152.67	78656	ENSMUSG00000003778	Brd8	bromodomain containing 8
Kif20a	24.82	13.15	19.43	6.58	1.81	14.09	9.59	12.58	0	27.92	11.23	9.05	0	0	25.7	0	25.57	12.67	0	0	3.36	2.19	1.82	0.52	0	0.67	0	0	4.71	5.68	0	5.61	11.7	11.06	17.23	17.48	19.87	8.98	19348	ENSMUSG00000003779	Kif20a	kinesin family member 20A
Farsa	54.6	164.7	91.96	149.42	103.33	78.03	238.93	122.73	92.37	121.71	252.5	227.1	80.56	118.63	93.18	81.24	48.81	102.93	60.92	232.06	232.09	245.54	222.21	253.59	107.41	166.03	27.36	25.33	75.44	62.83	131.49	90.91	67.86	106.56	113.24	91.78	114.28	134.71	66590	ENSMUSG00000003808	Farsa	phenylalanyl-tRNA synthetase/ alpha subunit
Gcdh	28.68	38.2	27.49	65.82	72.51	68.27	92.92	84.13	95.38	39.02	59.35	41.92	15.59	13.69	131.73	16.81	0	34.84	6.09	36.35	28.52	64.31	47.36	58.96	41.37	72.97	49.75	9.5	23.57	71.99	37.45	71.83	77.22	28.15	33.64	26.22	36.02	34.52	270076	ENSMUSG00000003809	Gcdh	glutaryl-Coenzyme A dehydrogenase
Mast2	175.92	174.1	162.11	120.45	113.3	55.27	91.44	82.4	73.29	107.75	104.27	96.51	119.54	301.15	343.79	114.86	106.91	14.25	91.38	223.68	145.96	144.69	149.35	195.15	150.95	111.8	174.13	189.97	159.36	107.35	183.91	272.73	140.4	137.22	155.09	143.35	132.91	82.23	17776	ENSMUSG00000003810	Mast2	microtubule associated serine/threonine kinase 2
Dnase2a	113.05	102.08	81.53	325.82	252.88	287.18	1375.33	1351.73	1075.27	594.21	505.96	427.66	324.84	237.27	549.42	644.32	766.99	671.42	581.78	808.03	770.92	595.59	444.42	605.79	444.87	431.8	661.7	345.12	280.06	582.87	766.45	881.04	577.99	383.02	408.65	484.24	479.47	614.62	13423	ENSMUSG00000003812	Dnase2a	deoxyribonuclease II alpha
Rad23a	233.83	266.15	201.93	321.87	294.57	233	500.72	360.37	301.2	351.52	376.34	361.91	405.4	438.03	250.61	574.28	646.13	326.21	584.82	399.82	473.68	349.31	322.38	375.69	188.69	234.31	689.07	639.58	385.68	343.53	432.74	296.3	367.39	387.54	402.09	555.04	491.89	338.18	19358	ENSMUSG00000003813	Rad23a	RAD23 homolog A/ nucleotide excision repair protein
Calr	1417.31	1437.86	1635.84	2985.7	4586.22	2771.03	3019.82	3955.01	2604.34	3976.57	4658.2	3916.16	2349.24	2030.46	2625.01	1512.75	1496.8	3547.13	2750.49	2726.04	4469.2	3234.44	3171.02	3334.73	2999.4	4340.11	1967.7	2824.28	2932.64	2348.85	2602.26	3750.86	3290.09	2077.45	1578.81	1785.73	1747.69	2041.71	12317	ENSMUSG00000003814	Calr	calreticulin
Syce2	61.21	38.83	45.51	23.04	36.25	32.51	27.29	25.15	30.12	56.2	52.3	46.44	54.57	41.07	93.18	72.84	72.05	45.92	54.83	16.78	13.14	18.27	29.14	29.22	12.34	22.09	139.31	22.16	42.43	54.62	25.8	32.55	63.18	41.22	75.49	69.05	38.51	33.96	71846	ENSMUSG00000003824	Syce2	synaptonemal complex central element protein 2
Nfat5	116.91	103.33	84.85	102.68	99.7	115.96	117.25	151.35	232.93	88.06	74.75	65.75	150.73	323.96	51.41	36.42	92.97	44.34	70.06	251.63	200.49	184.89	213.1	165.41	259.08	200.84	79.6	0	33.95	106.41	82.39	94.28	88.92	94	74.67	80.41	72.04	169.23	54446	ENSMUSG00000003847	Nfat5	nuclear factor of activated T cells 5
Nob1	54.6	53.23	52.62	56.61	73.42	44.43	44.98	61.15	100.4	66.58	79.57	120.03	15.59	36.5	28.92	50.42	97.62	28.5	6.09	69.9	78.29	65.04	71.03	63.14	95.79	53.56	4.98	6.33	84.87	94.72	34.95	60.61	51.48	40.71	63.19	47.2	44.72	53.6	67619	ENSMUSG00000003848	Nob1	NIN1/RPN12 binding protein 1 homolog
Nqo1	0.55	0.63	1.9	18.43	0.91	3.25	0.74	1.73	0	2.51	0.32	0.6	0	0	3.21	0	0	3.17	0	0	0	1.46	0	0	0	0	0	0	6.6	4.74	0	0	0	0.5	0	2.62	9.94	1.96	18104	ENSMUSG00000003849	Nqo1	NAD(P)H dehydrogenase/ quinone 1
Ppfia3	3.86	6.26	2.84	56.61	23.57	7.59	4.42	0	7.03	2.15	4.81	9.05	2.6	0	32.13	0	0	0	0	0	5.03	3.65	10.93	4.17	0	1.34	37.31	0	0	0	0	0	0	3.02	7.39	2.62	1.24	3.37	76787	ENSMUSG00000003863	Ppfia3	protein tyrosine phosphatase/ receptor type/ f polypeptide (PTPRF)/ interacting protein (liprin)/ alpha 3
Gys1	79.41	47.59	63.04	46.73	29	61.77	23.6	36.43	46.18	59.78	65.13	73.29	7.8	13.69	9.64	50.42	6.97	15.84	27.41	8.39	40.27	27.77	49.18	36.52	18.87	9.37	0	170.98	29.23	14.21	40.78	8.98	37.44	27.65	41.85	36.71	18.63	35.36	14936	ENSMUSG00000003865	Gys1	glycogen synthase 1/ muscle
Ruvbl2	105.33	75.78	71.58	142.83	72.51	148.47	90.71	108.42	80.32	75.53	87.27	122.75	179.31	159.7	102.82	170.88	83.67	82.34	286.32	95.06	113.53	156.39	103.82	144.01	136.44	206.86	325.88	113.98	155.59	149.66	195.57	188.55	322.92	96.01	116.52	118.87	135.39	98.23	20174	ENSMUSG00000003868	Ruvbl2	RuvB-like protein 2
Lin7b	4.41	7.51	0.47	1.97	0	0	0	0	0	0.72	0.64	3.92	0	0	9.64	0	0	0	0	5.59	6.71	20.46	41.89	15.65	15.24	8.03	0	0	4.71	0	0	0	0	0.5	0	6.99	0	2.53	22342	ENSMUSG00000003872	Lin7b	lin-7 homolog B (C, elegans)
Bax	566.92	350.07	433.25	642.43	493.06	488.75	645.26	489.61	310.23	530.5	772.57	845.06	423.59	561.23	681.15	459.43	601.97	492.48	441.66	329.92	251.38	403.39	358.81	356.9	323.67	285.86	457.72	455.94	402.65	352.38	382.81	497.2	503.11	377.99	460.35	533.18	698.08	806.02	12028	ENSMUSG00000003873	Bax	BCL2-associated X protein
Il7r	184.2	382.64	247.91	22.38	65.26	7.59	1.47	0.43	0	5.01	10.27	3.62	532.74	433.47	128.52	128.86	202.21	118.77	36.55	47.53	76.34	122.04	183.96	54.27	70.39	97.07	0	0	0	8.84	13.32	1.12	0	16.08	25.44	3.5	2.48	7.86	16197	ENSMUSG00000003882	Il7r	interleukin 7 receptor
Tfam	60.66	78.28	64.47	100.71	110.58	113.79	88.49	147.45	113.45	102.73	85.66	75.7	122.14	18.25	61.05	131.66	139.45	52.26	15.23	131.41	108.49	122.77	116.57	107.49	157.48	124.52	74.63	34.83	94.3	88.09	35.78	57.24	86.58	75.9	113.24	118.87	110.55	64.27	21780	ENSMUSG00000003923	Tfam	transcription factor A/ mitochondrial
Zfp81	11.58	9.39	19.43	8.56	9.06	7.59	8.11	18.21	40.16	8.23	5.13	3.02	41.58	0	12.85	0	16.27	3.17	0	27.96	20.13	27.04	12.75	26.61	15.24	25.44	2.49	0	1.89	12.95	14.98	3.37	7.02	30.16	19.69	9.61	27.33	30.59	224694	ENSMUSG00000003929	Zfp81	zinc finger protein 81
Efnb3	70.04	29.43	50.72	0	0.91	1.08	6.64	19.95	18.07	3.22	1.6	1.51	18.19	0	0	0	0	0	0	0	1.96	7.31	0	2.61	0	6.03	0	0	0	0	0	0	0	6.03	6.56	6.12	6.21	0.28	13643	ENSMUSG00000003934	Efnb3	ephrin B3
Mmd	471.52	331.28	378.27	149.42	85.2	163.64	59	79.79	103.41	119.2	132.83	159.24	142.93	123.2	41.77	117.66	174.32	121.93	48.74	39.14	14.26	33.62	20.04	23.48	34.83	46.86	0	41.16	39.6	59.36	34.12	60.61	135.72	52.78	46.77	76.92	95.64	101.03	67468	ENSMUSG00000003948	Mmd	monocyte to macrophage differentiation-associated
Hlf	27.57	9.39	13.27	0	0	1.08	0	0	0	0	0.32	0	0	0	0	0	0	15.84	0	11.18	20.97	22.65	29.14	19.83	44.99	27.45	0	0	0	0	0	0	0	0	3.28	0	0	0	217082	ENSMUSG00000003949	Hlf	hepatic leukemia factor
Fam162a	370.04	251.12	294.84	230.38	183.99	341.37	185.1	239.38	307.22	194.73	201.81	176.43	387.21	9.13	401.62	193.3	120.86	248.62	91.38	58.71	65.15	88.42	89.25	85.05	168.37	135.9	171.64	386.28	178.22	243.76	133.15	264.87	133.38	131.69	109.96	151.21	127.94	178.21	70186	ENSMUSG00000003955	Fam162a	family with sequence similarity 162/ member A
Rpl8	7548.69	9255.91	8184.43	5904.27	3712.48	4070.39	3109.05	2630.6	1995.93	5502.19	5296.02	7138.35	10501.4	7861.75	8334.48	8552.62	8692.58	8910.59	10828.3	3545.25	2086.54	2804.74	2686.53	2759.2	1830.99	1694.4	8139.45	7988.42	5743.64	5975.22	6724.11	7016.87	5449.94	10078.1	9468.77	8974.99	8734.74	3242.59	26961	ENSMUSG00000003970	Rpl8	ribosomal protein L8
Grm3	0	0	0	0	0	0	0	0	0	0	0	0	0	0	0	0	0	0	0	0	3.64	3.65	1.82	0	0	0	0	0	0	0	0	0	0	0	0	0	0	0	108069	ENSMUSG00000003974	Grm3	glutamate receptor/ metabotropic 3
Ssbp2	74.45	63.25	86.27	21.72	18.13	11.92	1.47	7.37	2.01	0.72	0.32	1.51	59.77	50.19	0	28.01	6.97	22.17	33.51	36.35	57.04	59.92	127.5	66.79	142.24	105.11	2.49	0	25.46	63.15	34.95	25.81	44.46	22.62	27.08	25.35	34.78	42.94	66970	ENSMUSG00000003992	Ssbp2	single-stranded DNA binding protein 2
Fancl	78.31	82.04	70.15	32.25	66.16	34.68	41.3	42.07	30.12	29.71	33.05	21.71	72.76	0	44.98	25.21	2.32	36.42	24.37	22.37	28.24	49.69	34.61	39.13	46.45	68.28	0	0	9.43	23.37	37.45	39.28	35.1	26.14	27.9	41.08	29.81	42.1	67030	ENSMUSG00000004018	Fancl	Fanconi anemia/ complementation group L
Brinp2	0	0	0	0	0	0	0	0	0	0	0	0	0	0	0	0	0	0	0	2.8	0.28	0	0	0	0	0	0	0	0	0	0	0	0	0	0	0	0	0	240843	ENSMUSG00000004031	Brinp2	bone morphogenic protein/retinoic acid inducible neural-specific 2
Gstm5	19.3	43.84	21.8	48.71	57.1	46.6	11.8	19.95	0	27.2	36.25	19.3	23.39	0	22.49	92.45	46.48	33.25	76.15	58.71	37.19	48.23	38.25	53.22	41.37	20.75	89.55	44.33	43.38	15.79	66.58	19.08	49.14	39.71	16.41	58.56	29.81	49.96	14866	ENSMUSG00000004032	Gstm5	glutathione S-transferase/ mu 5
Gstm7	0	0	0	16.46	8.16	0	12.54	3.04	9.04	0	0	0.3	0	0	0	0	0	0	0	0	6.15	0.73	0	0	0	6.03	0	0	2.83	2.84	0	0	2.34	4.02	0	3.5	0	3.65	68312	ENSMUSG00000004035	Gstm7	glutathione S-transferase/ mu 7
Gstm3	0	0	0	40.15	7.25	53.1	0	0	0	0	0	0	0	0	0	0	0	0	0	0	0	0	0	0	0	0	0	0	0	0	0	0	0	0	0	0	0	0	14864	ENSMUSG00000004038	Gstm3	glutathione S-transferase/ mu 3
Stat3	279.05	273.04	344.61	645.06	440.49	464.91	274.33	212.93	168.67	782.5	733.75	799.22	280.66	396.97	237.76	406.2	434.63	281.87	581.78	483.7	749.39	620.43	499.06	490.48	241.66	372.89	179.11	601.59	751.55	507.09	559.23	534.23	432.91	361.91	406.19	424.8	248.43	356.14	20848	ENSMUSG00000004040	Stat3	signal transducer and activator of transcription 3
Stat5a	55.7	117.73	49.3	32.91	71.6	36.85	35.4	29.06	38.15	71.59	75.08	58.81	90.95	36.5	0	30.82	39.51	11.08	6.09	39.14	21.25	26.31	49.18	38.61	47.9	51.55	37.31	19	106.56	30.31	61.58	43.77	86.58	59.31	36.11	28.84	44.72	33.4	20850	ENSMUSG00000004043	Stat5a	signal transducer and activator of transcription 5A
Cavin1	3.31	5.01	1.42	19.75	35.35	2.17	0.74	1.3	0	7.88	2.57	1.21	20.79	0	12.85	16.81	32.54	15.84	18.28	0	0	2.19	0	0	0.73	1.34	161.69	50.66	66.01	53.05	60.75	84.18	30.42	8.04	4.92	25.35	11.18	8.7	19285	ENSMUSG00000004044	Cavin1	caveolae associated 1
Map3k11	39.71	164.08	82.95	158.63	136.86	73.69	266.95	129.67	70.28	168.24	202.45	135.72	158.52	351.34	215.27	148.47	81.35	169.44	350.28	738.13	313.74	455.28	537.31	421.6	121.2	210.88	303.49	132.98	507.32	452.15	484.34	640.86	170.82	675.56	504.66	761.32	576.35	172.32	26403	ENSMUSG00000004054	Map3k11	mitogen-activated protein kinase kinase kinase 11
Akt2	49.08	132.14	90.54	46.08	44.41	45.52	106.19	67.65	43.17	63.36	61.28	69.37	28.59	205.33	51.41	72.84	60.43	71.26	70.06	111.84	81.93	71.62	72.86	54.27	78.38	38.16	181.6	275.46	129.19	104.83	117.34	153.76	65.52	149.79	117.34	157.33	168.93	87.28	11652	ENSMUSG00000004056	Akt2	thymoma viral proto-oncogene 2
Dnaja3	43.57	39.45	26.55	77.01	53.48	67.19	78.17	73.29	87.35	72.67	65.13	56.1	64.97	196.2	19.28	30.82	25.57	22.17	42.64	33.55	51.17	60.65	81.96	79.83	52.25	64.94	2.49	19	29.23	28.73	72.4	57.24	18.72	18.6	54.16	37.59	36.02	58.37	83945	ENSMUSG00000004069	Dnaja3	DnaJ heat shock protein family (Hsp40) member A3
Hmox2	185.3	147.79	182.02	562.12	412.4	544.02	661.48	531.67	608.42	496.49	663.17	741.01	485.96	164.26	575.12	554.67	553.16	519.4	490.4	478.11	656.83	703.74	795.94	771.72	758.38	612.56	733.84	525.6	1357.88	833.89	912.91	645.35	1146.62	624.29	657.29	667.79	1002.41	1006.96	15369	ENSMUSG00000004070	Hmox2	heme oxygenase 2
Cdip1	334.2	273.04	395.33	76.35	78.85	157.14	146.75	184.31	148.59	78.39	80.85	66.05	51.97	0	102.82	70.03	88.32	99.76	33.51	78.29	144.56	130.08	151.17	151.84	294.64	237.66	134.33	69.66	115.04	157.24	78.23	131.31	109.98	62.83	66.47	37.59	85.71	75.21	66626	ENSMUSG00000004071	Cdip1	cell death inducing Trp53 target 1
Map3k20	81.07	56.99	62.1	17.77	22.66	17.34	22.86	8.67	26.1	33.65	20.85	18.7	2.6	0	16.06	22.41	0	12.67	51.78	25.16	13.7	13.15	1.82	16.18	15.24	9.37	171.64	41.16	33	44.52	39.11	22.45	0	24.63	23.8	20.98	8.69	25.26	65964	ENSMUSG00000004085	Map3k20	mitogen-activated protein kinase kinase kinase 20
Cwc15	736.23	547.34	703.92	441.67	668.9	717.41	361.35	467.92	488.94	590.27	577.18	503.36	704.25	542.98	420.9	271.73	597.32	389.55	472.12	234.86	311.22	333.24	296.88	368.38	518.16	392.97	395.53	804.22	468.66	634.97	377.82	452.3	559.27	412.67	543.23	502.59	521.7	641.28	66070	ENSMUSG00000004096	Cwc15	CWC15 spliceosome-associated protein
Col5a3	0	0	0	6.58	9.97	6.5	0	0	0	0	0	0	0	0	0	0	0	0	0	0	0	0	0	0	0	0	0	0	1.89	0	0	6.73	9.36	3.02	5.74	2.62	4.97	7.3	53867	ENSMUSG00000004098	Col5a3	collagen/ type V/ alpha 3
Dnmt1	81.62	41.96	115.19	65.82	82.48	146.3	47.93	58.54	94.37	128.51	101.06	91.68	122.14	18.25	99.6	120.46	109.24	47.51	27.41	72.69	114.37	51.15	78.32	39.66	39.19	57.57	124.38	278.63	109.38	211.55	120.67	39.28	109.98	123.15	120.63	104.01	79.5	76.34	13433	ENSMUSG00000004099	Dnmt1	DNA methyltransferase (cytosine-5) 1
Ppan	78.86	88.3	37.92	126.38	120.55	105.12	241.14	205.12	125.5	66.94	258.59	335.37	88.36	118.63	32.13	92.45	95.29	106.1	201.03	324.33	185.95	241.89	258.64	274.46	160.38	155.31	47.26	0	78.27	123.14	146.47	95.4	65.52	100.03	123.09	143.35	108.07	55.85	235036	ENSMUSG00000004100	Ppan	peter pan homolog
Angptl2	36.95	29.43	42.66	3.95	4.53	13	5.16	2.17	0	0.36	0.32	0.6	72.76	187.08	0	0	18.59	0	0	0	0	0	5.46	0.52	0	0	0	0	3.77	0	0	0	4.68	9.05	0.82	0.87	8.69	6.17	26360	ENSMUSG00000004105	Angptl2	angiopoietin-like 2
Cacna1e	260.3	308.74	313.8	5.27	0	0	0.74	0	5.02	0	0	0	0	0	0	0	4.65	0	0	0	0.28	0	0	0	0	0.67	0	0	0	0	0	0	0	1.01	0	0	1.24	0	12290	ENSMUSG00000004110	Cacna1e	calcium channel/ voltage-dependent/ R type/ alpha 1E subunit
Cacna1b	0	0	0	2.63	0	0	0	0	0	0	0	0	0	0	0	0	0	1.58	0	0	0	0	0	0	0	0	0	0	0.94	0	0	0	4.68	0	0	0	1.24	0	12287	ENSMUSG00000004113	Cacna1b	calcium channel/ voltage-dependent/ N type/ alpha 1B subunit
Trmt10a	24.82	33.19	36.5	13.82	9.97	9.75	12.54	28.62	74.3	14.32	8.98	12.37	44.18	13.69	12.85	0	16.27	14.25	0	114.63	74.66	58.46	74.68	61.05	103.78	46.86	9.95	0	63.18	23.68	43.27	42.65	79.56	64.84	40.21	23.6	53.41	17.68	108943	ENSMUSG00000004127	Trmt10a	tRNA methyltransferase 10A
Etv1	0	0	0	8.56	10.88	5.42	5.9	16.05	12.05	1.07	0.32	0	62.37	9.13	0	0	0	26.92	0	30.76	23.49	37.27	47.36	30.26	42.82	55.57	69.65	0	45.26	126.3	75.73	63.97	30.42	60.32	82.88	100.52	108.07	145.66	14009	ENSMUSG00000004151	Etv1	ets variant 1
Kifc2	15.99	28.81	22.28	30.94	18.13	18.42	32.45	54.21	13.05	16.11	25.67	11.76	15.59	0	9.64	22.41	0	0	0	33.55	49.49	51.89	58.28	52.7	52.25	109.12	0	41.16	13.2	23.68	74.9	40.4	14.04	11.56	20.51	5.24	7.45	24.7	16581	ENSMUSG00000004187	Kifc2	kinesin family member C2
Psap	408.1	648.79	414.29	1689	5048.47	4756.37	3305.21	4535.25	4549.07	1004.07	1030.52	616.75	1146.03	876.06	8755.38	11216.7	11802.4	8060.23	5412.65	2636.57	1650.05	1941.69	1695.7	1463.08	2265.69	2548.64	3544.84	4201.6	8682.88	4684.44	3534.32	3232.34	3105.23	3434.1	3010.74	3310.12	2583.66	537.16	19156	ENSMUSG00000004207	Psap	prosaposin
Ikbkg	79.96	94.56	82.48	82.94	60.73	59.6	95.13	87.6	80.32	80.54	72.19	63.64	57.17	4.56	12.85	47.62	48.81	52.26	51.78	30.76	52.29	62.12	72.86	79.31	95.07	102.43	47.26	0	53.75	37.26	20.8	16.84	67.86	35.19	51.7	31.47	58.38	71.85	16151	ENSMUSG00000004221	Ikbkg	inhibitor of kappaB kinase gamma
Pax2	0	0	0	0	0	0	0	0	0	0	0	0	0	0	0	0	0	0	0	0	0	0	0	0	0	0	0	0	0	0	0	0	0	0	1.64	0	0	0	18504	ENSMUSG00000004231	Pax2	paired box 2
Wars2	30.88	37.57	25.12	35.54	29.91	22.76	23.6	35.13	60.24	28.64	38.82	15.68	2.6	0	38.56	39.22	16.27	19	42.64	44.74	41.1	35.08	21.86	27.65	18.14	10.04	0	0	11.32	10.42	24.97	17.96	30.42	21.61	24.62	18.36	18.63	19.08	70560	ENSMUSG00000004233	Wars2	tryptophanyl tRNA synthetase 2 (mitochondrial)
Atn1	186.95	67.01	102.39	275.14	141.39	73.69	87.76	67.22	91.36	176.47	101.7	239.16	70.17	41.07	64.26	81.24	106.91	58.59	70.06	198.51	281.86	218.5	245.89	226.98	78.38	119.83	0	446.44	53.75	53.99	104.02	88.66	56.16	94	77.14	97.02	63.35	180.46	13498	ENSMUSG00000004263	Atn1	atrophin 1
Phb2	574.09	401.42	462.17	462.73	431.43	469.24	572.99	434.1	398.58	689.43	743.05	757.29	584.71	511.04	652.24	302.55	292.85	370.55	493.44	184.53	451.03	439.93	409.81	568.75	413.66	414.4	134.33	215.3	384.73	377	393.63	410.78	482.05	395.58	378.29	390.71	391.27	305.91	12034	ENSMUSG00000004264	Phb2	prohibitin 2
Ptpn6	880.72	1162.94	614.33	1095.28	1741.13	1170.4	2260.25	1623.63	1177.68	1067.08	1594.23	1113.47	2907.96	1679.12	1821.76	1568.77	980.82	1000.8	1489.47	1219.03	1338.55	1429.41	1438.89	1398.91	685.08	1148.13	529.86	728.23	1076.87	837.36	956.19	695.85	772.21	1404.9	1691.23	1110.95	1034.7	983.67	15170	ENSMUSG00000004266	Ptpn6	protein tyrosine phosphatase/ non-receptor type 6
Eno2	0	0	0	6.58	2.72	2.17	3.69	7.81	11.04	1.07	0	4.22	0	0	0	0	0	34.84	0	5.59	6.71	19	40.07	4.7	21.05	0	0	0	0	1.89	0	0	0	0	0	0	0	0	13807	ENSMUSG00000004267	Eno2	enolase 2/ gamma neuronal
Emg1	162.14	90.18	84.85	123.75	80.67	160.39	95.13	76.32	120.48	197.59	173.89	155.02	114.34	155.14	89.96	151.27	162.7	134.6	76.15	89.47	135.9	135.19	91.07	188.36	132.81	127.87	106.97	145.65	111.27	225.44	108.18	111.11	224.64	147.28	120.63	159.08	163.96	128.82	14791	ENSMUSG00000004268	Emg1	EMG1 N1-specific pseudouridine methyltransferase
Lpcat3	170.96	66.38	89.59	198.78	325.39	193.98	306.04	426.72	369.47	565.93	572.05	566.09	218.29	250.96	195.99	131.66	181.29	199.53	170.57	729.74	926.39	911.29	952.58	974.17	1232.27	1168.21	276.12	142.48	152.76	104.2	141.47	164.98	124.02	118.12	117.34	154.71	98.13	80.27	14792	ENSMUSG00000004270	Lpcat3	lysophosphatidylcholine acyltransferase 3
Atp6v1f	1958.87	1021.41	1980.93	1309.86	1359.55	1759.93	1140.82	1095	1238.92	1774.76	1511.13	1584.26	1832.09	1158.96	2319.77	1972.17	1438.69	1618.38	2107.8	676.62	437.61	649.67	628.38	739.37	984.8	725.7	2549.8	2020.06	1376.74	1154.69	1728.46	1441.09	1593.56	1044	1042.15	1113.57	1494.3	1150.09	66144	ENSMUSG00000004285	Atp6v1f	ATPase/ H+ transporting/ lysosomal V1 subunit F
Il12b	0	0	3.32	10.53	13.6	11.92	2.95	3.9	0	0	0	0.3	0	77.57	347	159.68	276.58	243.87	3.05	0	0.28	0	0	0	0	0	0	6.33	0	0	0	2.24	0	4.02	0.82	0	0	3.09	16160	ENSMUSG00000004296	Il12b	interleukin 12b
Clcn5	18.75	38.2	51.19	38.18	25.38	37.93	42.03	41.2	57.23	58.35	38.5	36.79	15.59	0	0	2.8	27.89	26.92	39.6	106.25	120.52	68.69	58.28	91.31	64.59	76.32	161.69	22.16	108.44	154.4	180.59	131.31	39.78	118.63	99.29	122.37	98.13	137.24	12728	ENSMUSG00000004317	Clcn5	chloride channel/ voltage-sensitive 5
Clcn3	75	70.14	60.2	73.06	40.79	66.11	69.32	91.94	86.34	77.32	59.68	66.65	119.54	0	32.13	84.04	88.32	66.51	51.78	164.96	165.82	153.46	127.5	95.49	124.82	79.67	0	0	10.37	61.26	42.44	24.69	4.68	63.33	54.98	97.02	79.5	85.88	12725	ENSMUSG00000004319	Clcn3	chloride channel/ voltage-sensitive 3
Hif3a	0	0	0	1.97	0	0	0.74	3.04	0	0	0	0	0	0	0	0	0	0	0	0	12.02	4.38	0	1.57	5.81	15.4	101.99	41.16	46.21	38.84	50.76	0	67.86	10.05	19.69	9.61	2.48	57.53	53417	ENSMUSG00000004328	Hif3a	hypoxia inducible factor 3/ alpha subunit
Gpx5	0	0	0	0.66	0	0	0	0	0	0	0	0	0	0	0	0	0	0	0	0	0	0	0	0	0	0	0	0	0	0	0	0	0	0	0	0	0	0	14780	ENSMUSG00000004344	Gpx5	glutathione peroxidase 5
Pde1c	0	0	0	1.97	0	0	0	0.43	0	1.43	0	0	0	0	0	0	0	0	0	0	0	0	0	0	0	0	0	0	0	0	0	0	0	0.5	0	0	0	0	18575	ENSMUSG00000004347	Pde1c	phosphodiesterase 1C
Utp20	36.4	31.94	23.7	65.82	48.94	63.94	53.83	61.15	44.18	60.14	51.65	39.51	49.38	22.81	0	11.21	2.32	14.25	21.32	75.49	52.85	25.58	34.61	50.61	26.85	47.53	4.98	158.31	22.63	17.37	23.3	20.2	25.74	37.2	21.34	42.83	13.66	22.17	70683	ENSMUSG00000004356	Utp20	UTP20 small subunit processome component
Spic	0.55	12.52	0	46.73	87.92	71.52	4042.65	4281.12	5346.23	15.75	8.66	0.6	0	0	6.43	50.42	0	31.67	24.37	0	0.84	0.73	0	20.87	0	12.05	27.36	22.16	14.14	31.89	30.79	34.79	70.2	86.96	40.21	51.57	58.38	29.19	20728	ENSMUSG00000004359	Spic	Spi-C transcription factor (Spi-1/PU,1 related)
9330159F19Rik	0	0	0	0	0	0	0	0	0	0.36	0	0	0	0	0	0	0	0	0	0	0	0	0	0	0	0	0	0	0	0	0	0	0	0	0	0	0	0	212448	ENSMUSG00000004360	9330159F19Rik	RIKEN cDNA 9330159F19 gene
Cul3	152.76	179.73	152.16	129.67	187.62	130.04	147.49	182.57	154.61	183.63	144.38	174.92	98.75	168.82	61.05	165.28	83.67	175.77	82.24	148.18	116.32	100.85	111.1	99.14	118.29	151.97	126.87	25.33	66.01	141.46	110.68	90.91	98.28	175.93	159.19	130.24	150.3	192.8	26554	ENSMUSG00000004364	Cul3	cullin 3
Sst	0	0	0	32.25	1.81	4.33	0	0	0	0	0	0	0	0	0	0	0	0	0	0	0.28	0.73	1.82	0	0.73	3.35	0	0	0	0	0	0	0	0	0	0	0	0	20604	ENSMUSG00000004366	Sst	somatostatin
Il11	0	2.5	1.42	0	0	0	0	0	0	1.07	1.28	0.9	0	0	0	0	0	0	0	0	0	0	0	0	0	0	0	0	1.89	1.58	0	0	0	0	0	0	0	0.28	16156	ENSMUSG00000004371	Il11	interleukin 11
Large1	10.48	15.66	6.64	7.9	7.25	4.33	50.88	62.45	48.19	68.37	30.48	37.7	2.6	0	28.92	19.61	2.32	7.92	12.18	89.47	61.8	61.39	107.46	63.66	76.2	160	0	0	10.37	6	4.99	2.24	2.34	16.08	10.67	13.11	2.48	12.07	16795	ENSMUSG00000004383	Large1	LARGE xylosyl- and glucuronyltransferase 1
Ddx56	73.9	113.98	89.59	78.33	70.7	96.45	122.42	57.24	37.15	73.38	114.54	113.7	192.3	91.26	28.92	42.02	30.21	64.93	33.51	64.31	95.35	116.19	100.18	104.88	63.86	86.36	62.19	50.66	84.87	82.41	69.9	107.74	51.48	80.42	38.57	60.31	68.32	56.41	52513	ENSMUSG00000004393	Ddx56	DEAD (Asp-Glu-Ala-Asp) box polypeptide 56
Tmed4	95.41	68.26	116.61	112.56	87.92	113.79	139.38	170	207.83	157.5	147.26	171	215.69	59.32	67.47	72.84	74.38	82.34	24.37	83.88	134.22	146.89	227.67	176.36	193.04	168.03	37.31	117.15	114.1	111.14	86.55	42.65	187.2	57.8	52.52	69.93	72.04	111.98	103694	ENSMUSG00000004394	Tmed4	transmembrane p24 trafficking protein 4
Bid	14.34	14.4	22.75	104.66	74.32	130.04	79.64	104.95	138.55	36.15	26.31	33.78	0	0	0	2.8	18.59	11.08	18.28	100.65	174.2	208.27	187.6	234.8	283.76	298.58	0	0	51.86	85.25	37.45	37.04	60.84	51.77	45.95	62.93	52.17	116.75	12122	ENSMUSG00000004446	Bid	BH3 interacting domain death agonist
Ralb	140.63	87.67	82.48	185.62	122.36	125.71	99.55	75.02	127.51	178.62	154	248.21	153.32	228.14	147.8	361.38	153.4	163.1	167.53	413.8	310.66	366.85	404.35	157.58	148.77	145.94	365.68	424.28	237.63	176.19	115.67	142.54	170.82	172.41	184.63	201.04	150.3	160.81	64143	ENSMUSG00000004451	Ralb	v-ral simian leukemia viral oncogene B
Ppp1cc	4.41	6.26	3.79	4.61	5.44	8.67	2.95	3.9	4.02	4.3	4.17	4.52	0	0	16.06	28.01	32.54	36.42	15.23	19.57	16.78	11.69	23.68	6.78	13.06	6.69	34.83	12.66	46.21	22.42	34.95	19.08	4.68	8.55	6.56	14.86	18.63	5.89	19047	ENSMUSG00000004455	Ppp1cc	protein phosphatase 1 catalytic subunit gamma
Dnajb11	209.01	194.14	199.56	330.43	455	359.79	230.08	317.44	282.12	306.05	419.01	450.88	228.69	469.97	237.76	154.08	155.72	167.86	48.74	212.49	206.36	211.93	203.99	243.67	267.06	285.19	79.6	227.97	173.51	143.67	109.02	120.09	170.82	120.13	133.76	131.99	88.19	170.35	67838	ENSMUSG00000004460	Dnajb11	DnaJ heat shock protein family (Hsp40) member B11
Tbccd1	35.85	22.54	15.17	48.71	64.35	46.6	50.15	92.37	93.37	43.31	58.39	42.83	0	0	9.64	2.8	2.32	7.92	27.41	50.33	50.89	65.04	63.75	57.92	98.7	94.39	37.31	41.16	27.35	30.94	31.62	10.1	37.44	23.12	31.18	20.98	38.51	33.96	70573	ENSMUSG00000004462	Tbccd1	TBCC domain containing 1
Clec11a	156.62	162.2	146.95	1.32	0	0	5.9	1.73	4.02	0	2.25	0.6	7.8	0	0	5.6	0	0	0	0	0.28	0.73	0	1.04	0	0.67	0	0	5.66	0.63	0.83	1.12	0	0	0.82	0	2.48	1.12	20256	ENSMUSG00000004473	Clec11a	C-type lectin domain family 11/ member a
Zfp324	7.72	0.63	14.22	13.16	21.75	9.75	40.56	16.05	17.07	7.88	4.81	5.13	103.95	0	41.77	0	2.32	0	9.14	22.37	38.31	17.54	32.78	28.18	29.75	52.89	0	0	10.37	3.16	0	24.69	42.12	4.02	13.95	0.87	8.69	8.98	243834	ENSMUSG00000004500	Zfp324	zinc finger protein 324
Gab2	147.25	268.66	222.32	142.83	256.5	222.16	119.47	181.27	262.04	201.89	229.72	218.65	62.37	260.08	314.87	448.22	576.41	277.12	286.32	83.88	67.39	40.19	76.5	69.92	111.03	56.9	236.32	113.98	89.58	83.99	148.96	80.81	119.34	121.64	116.52	90.9	89.43	153.23	14389	ENSMUSG00000004508	Gab2	growth factor receptor bound protein 2-associated protein 2
Coro1c	351.29	384.51	312.85	437.72	622.67	740.17	255.89	191.25	97.39	838.7	889.67	709.64	823.79	629.67	918.91	515.45	502.03	771.19	636.6	167.76	196.29	133	160.28	237.41	162.56	223.6	616.93	1219	993.89	1007.87	1102.65	1005.62	575.65	659.98	751.66	949.24	771.37	583.47	23790	ENSMUSG00000004530	Coro1c	coronin/ actin binding protein 1C
Tax1bp1	870.79	819.76	975.53	473.26	356.2	542.94	290.55	346.06	556.21	504.36	407.78	431.27	319.64	542.98	533.36	504.25	608.95	278.7	222.35	413.8	358.2	301.81	309.63	233.24	404.23	372.22	475.13	167.81	323.44	415.84	297.92	344.56	369.73	496.11	491.53	580.38	537.85	394.87	52440	ENSMUSG00000004535	Tax1bp1	Tax1 (human T cell leukemia virus type I) binding protein 1
Ctse	3.31	2.5	0	15.8	4.53	35.76	51.62	81.1	88.35	1.43	1.28	0	0	0	138.16	0	23.24	26.92	15.23	8.39	17.9	0.73	1.82	1.04	0	0.67	0	22.16	0.94	9.16	0	0	0	5.53	2.46	5.24	0	2.25	13034	ENSMUSG00000004552	Ctse	cathepsin E
Ndrg2	22.06	29.43	5.21	61.21	26.28	10.84	0.74	0	0	3.22	1.28	0.9	0	0	3.21	0	0	0	0	8.39	15.1	19.73	5.46	16.18	33.38	37.49	67.17	0	6.6	9.47	34.95	0	11.7	27.14	31.18	18.36	24.84	14.31	29811	ENSMUSG00000004558	Ndrg2	N-myc downstream regulated gene 2
Mettl17	59.01	36.32	49.77	78.99	75.23	104.04	105.45	116.66	187.75	89.13	113.25	119.73	174.11	41.07	96.39	25.21	25.57	60.17	30.46	150.98	117.72	137.39	94.71	156.01	174.9	221.59	34.83	0	64.12	60.31	76.56	76.32	39.78	43.23	68.11	37.59	53.41	65.95	52535	ENSMUSG00000004561	Mettl17	methyltransferase like 17
Arhgef40	169.86	179.73	114.71	43.44	50.76	35.76	5.16	0	13.05	195.09	125.13	183.07	155.92	100.38	276.32	84.04	130.16	41.17	42.64	914.27	1111.22	1079.37	1287.71	994.52	611.06	781.93	0	0	12.26	3.47	0.83	3.37	7.02	50.26	40.21	33.21	29.81	26.38	268739	ENSMUSG00000004562	Arhgef40	Rho guanine nucleotide exchange factor (GEF) 40
Pnpla6	112.5	110.22	116.13	74.38	69.79	57.44	143.06	88.47	97.39	68.01	106.84	99.83	109.15	104.95	160.65	53.23	118.54	72.84	48.74	75.49	86.12	104.5	111.1	70.96	182.16	147.28	216.42	44.33	231.97	68.2	160.61	154.88	149.76	82.43	107.5	57.69	98.13	97.67	50767	ENSMUSG00000004565	Pnpla6	patatin-like phospholipase domain containing 6
Mcoln1	371.7	300.6	312.85	271.19	238.37	283.93	318.57	314.41	494.97	489.33	463.61	577.85	132.53	146.01	347	89.64	130.16	269.2	161.44	192.92	205.52	329.58	313.28	271.33	269.97	313.31	69.65	205.81	455.46	210.92	211.38	242.43	184.86	148.78	154.27	175.69	191.29	298.89	94178	ENSMUSG00000004567	Mcoln1	mucolipin 1
Arhgef18	18.2	38.83	20.38	23.04	47.13	58.52	78.17	59.85	62.25	95.22	79.57	53.38	0	73.01	73.9	0	30.21	25.34	0	55.92	90.88	106.69	87.43	74.09	95.79	157.99	0	31.66	50.92	41.68	29.96	41.53	53.82	63.84	42.67	21.85	26.08	57.81	102098	ENSMUSG00000004568	Arhgef18	rho/rac guanine nucleotide exchange factor (GEF) 18
Pkn2	122.43	107.09	175.39	129.67	92.45	113.79	72.27	81.53	68.27	89.49	55.18	86.86	96.15	200.76	64.26	198.9	158.05	278.7	130.98	293.57	242.15	139.58	145.71	74.62	68.94	72.97	425.38	66.49	91.47	227.65	204.72	149.27	194.22	219.66	180.53	139.85	216.13	136.39	109333	ENSMUSG00000004591	Pkn2	protein kinase N2
Cd33	7.72	36.32	19.91	171.14	240.19	263.34	35.4	23.85	43.17	289.95	327.25	248.51	23.39	4.56	330.94	521.06	425.33	289.79	106.61	405.41	465.01	607.28	621.09	613.1	730.07	646.03	318.41	446.44	144.27	428.47	302.09	396.19	355.69	137.73	157.55	219.39	182.59	307.03	12489	ENSMUSG00000004609	Cd33	CD33 antigen
Etfb	281.81	341.3	243.17	384.4	242	272.01	1386.39	818.32	525.09	600.66	821.66	744.63	644.48	552.1	498.01	411.8	418.36	462.39	813.27	534.02	286.33	439.93	358.81	317.77	194.49	196.82	738.82	1313.99	628.96	479.62	942.87	766.56	587.35	865.06	732.79	1048.01	1023.52	301.13	110826	ENSMUSG00000004610	Etfb	electron transferring flavoprotein/ beta polypeptide
Nkg7	0	0	0.95	13.16	10.88	7.59	1.47	24.72	1	26.49	45.24	15.38	0	0	0	0	0	0	0	0	0	3.65	0	0	2.9	0	0	0	0	0	0	0	63.18	59.82	59.08	9.61	44.72	20.49	72310	ENSMUSG00000004612	Nkg7	natural killer cell group 7 sequence
Stxbp2	548.73	839.8	804.41	701.67	444.12	613.38	1196.87	1003.93	727.89	980.81	1215.96	1252.81	1096.66	351.34	636.17	319.36	606.62	712.59	679.25	472.51	379.45	386.58	506.34	453.95	531.95	435.15	450.26	946.71	717.6	508.67	616.65	539.85	547.57	546.38	476.76	437.04	515.49	453.53	20911	ENSMUSG00000004626	Stxbp2	syntaxin binding protein 2
Pcp2	0	0	0	0	0	0	0	0	0	0	0	0	0	0	0	0	0	0	0	0	0	0	0	0	0	0	0	0	0	0	0	1.12	0	0	0	0	0	0	18545	ENSMUSG00000004630	Pcp2	Purkinje cell protein 2 (L7)
Sgce	0.55	0	0	1.32	5.44	13	1.47	0.87	6.02	0.72	0.64	0	0	0	0	0	16.27	3.17	0	176.14	354	356.62	271.39	382.99	518.16	483.35	116.92	3.17	49.03	60.94	44.94	21.32	74.88	61.32	70.57	78.67	86.95	118.43	20392	ENSMUSG00000004631	Sgce	sarcoglycan/ epsilon
Chn2	3.31	0	0.47	13.16	21.75	47.68	117.25	158.72	277.1	2.86	1.93	0	0	0	16.06	5.6	6.97	12.67	0	293.57	298.36	228	227.67	230.63	273.6	322.01	0	28.5	8.49	21.47	26.63	12.35	60.84	32.67	47.59	60.31	43.47	39.57	69993	ENSMUSG00000004633	Chn2	chimerin 2
Wwox	33.09	70.14	31.29	17.77	16.31	21.67	6.64	9.54	1	71.59	58.07	61.83	0	0	0	44.82	18.59	25.34	30.46	22.37	20.13	17.54	30.96	31.31	24.67	20.75	82.09	101.32	32.06	27.79	27.46	38.16	42.12	13.07	28.72	45.45	28.57	11.79	80707	ENSMUSG00000004637	Wwox	WW domain-containing oxidoreductase
Slbp	15.99	22.54	16.59	15.8	12.69	4.33	7.37	7.81	3.01	12.17	10.27	12.97	80.56	0	3.21	30.82	39.51	23.75	63.96	30.76	29.36	20.46	18.21	13.57	2.9	6.03	0	66.49	8.49	28.73	24.97	3.37	9.36	30.16	20.51	23.6	22.36	23.57	20492	ENSMUSG00000004642	Slbp	stem-loop binding protein
Aqp1	2.21	0	4.74	69.11	10.88	9.75	60.47	76.76	56.22	1.43	0.32	1.21	18.19	0	0	47.62	23.24	76.01	85.29	0	0	0	0	0	0	0.67	184.08	500.27	288.55	361.85	639.12	509.54	84.24	30.66	22.16	118	140.36	69.04	11826	ENSMUSG00000004655	Aqp1	aquaporin 1
Arid3b	54.05	33.19	10.9	67.14	52.57	87.78	52.36	45.1	82.33	53.34	46.84	45.54	220.89	123.2	234.55	120.46	283.55	221.7	335.05	575.96	419.71	334.7	402.52	260.89	252.55	243.01	176.62	75.99	49.03	58.1	72.4	86.42	86.58	153.31	201.86	97.02	135.39	74.65	56380	ENSMUSG00000004661	Arid3b	AT rich interactive domain 3B (BRIGHT-like)
Cnn2	898.37	821.01	1009.66	604.91	662.56	797.61	556.77	649.63	361.44	172.89	188.33	159.54	3175.63	1482.92	1375.16	1364.27	1222.54	1385.6	1970.73	394.23	244.39	225.08	211.28	227.5	150.22	220.25	1711.47	1241.17	1039.15	1221.95	1375.61	1780.03	1577.18	2317.71	1793.81	1502.53	1714.16	1128.2	12798	ENSMUSG00000004665	Cnn2	calponin 2
Polr2e	462.14	469.68	370.21	260.66	255.6	247.08	284.65	257.16	199.79	306.41	343.61	287.11	826.39	985.57	263.46	563.08	509	430.72	664.02	556.39	366.86	643.09	555.52	476.39	558.8	409.71	402.99	405.28	348.9	481.83	449.38	492.71	657.55	499.63	444.76	538.43	524.18	387.57	66420	ENSMUSG00000004667	Polr2e	polymerase (RNA) II (DNA directed) polypeptide E
Abca13	0	0	0	0	0	0	0	0	0	0	0	0	0	0	0	0	0	0	0	16.78	1.96	0	0	2.09	0	0	0	0	0	0	0	0	0	0	0	0	0	0	268379	ENSMUSG00000004668	Abca13	ATP-binding cassette/ sub-family A (ABC1)/ member 13
Myo9b	137.32	216.05	175.39	263.29	438.68	447.57	472.7	653.1	339.35	298.9	321.48	249.72	168.92	86.69	777.54	204.5	395.12	628.67	615.28	257.23	231.81	173.93	209.46	231.15	288.84	310.63	315.93	335.62	313.07	247.86	332.04	350.17	212.94	325.72	294.59	195.79	284.45	175.4	17925	ENSMUSG00000004677	Myo9b	myosin IXb
Hdac9	0.55	0.63	0.47	21.72	11.78	8.67	106.93	103.21	41.16	16.47	5.45	4.22	0	0	6.43	42.02	146.43	9.5	30.46	27.96	43.34	17.54	27.32	29.74	12.34	10.04	0	0	14.14	31.89	18.31	53.87	42.12	48.25	38.57	61.19	23.6	69.32	79221	ENSMUSG00000004698	Hdac9	histone deacetylase 9
Ly9	13.24	35.07	21.8	188.25	302.73	206.99	685.82	1028.22	647.57	145.33	150.79	111.29	0	123.2	163.86	274.54	178.96	319.88	213.22	187.33	52.57	165.16	120.21	82.44	122.65	96.4	124.38	199.47	254.6	225.13	245.5	179.57	147.42	78.41	88.62	59.44	74.53	151.55	17085	ENSMUSG00000004707	Ly9	lymphocyte antigen 9
Cd244a	250.92	328.15	272.56	84.91	112.39	98.62	208.7	202.09	173.69	43.67	31.44	16.29	311.85	661.61	12.85	89.64	109.24	47.51	42.64	2.8	5.03	3.65	5.46	14.61	1.45	6.03	0	31.66	0	0.32	0	0	32.76	22.12	12.31	9.61	1.24	1.4	18106	ENSMUSG00000004709	Cd244a	CD244 molecule A
Adgre1	836.6	712.04	1011.56	3082.46	3425.17	2447	3374.53	4186.58	3369.38	996.92	1004.53	1068.84	356.02	228.14	1163.1	1190.59	1282.97	744.26	478.21	550.8	661.03	980.71	1165.68	1054.53	1594.4	1319.51	328.36	227.97	359.27	1097.86	541.76	694.73	2758.9	1441.6	1473.78	1193.11	1582.49	2981.31	13733	ENSMUSG00000004730	Adgre1	adhesion G protein-coupled receptor E1
Mtfp1	2.76	3.13	1.42	18.43	12.69	18.42	11.8	25.15	24.1	22.91	22.78	21.71	0	0	151.01	5.6	25.57	20.59	9.14	36.35	15.1	36.54	30.96	22.96	6.53	19.41	27.36	0	25.46	13.89	39.95	86.42	25.74	17.09	14.77	48.07	8.69	6.74	67900	ENSMUSG00000004748	Mtfp1	mitochondrial fission process 1
Rab23	11.03	6.26	14.69	15.8	29	11.92	23.6	13.88	16.06	10.02	6.74	6.94	0	0	48.19	16.81	0	17.42	0	8.39	20.69	11.69	23.68	15.65	22.5	22.09	57.21	0	11.32	12.31	14.15	4.49	18.72	7.04	8.21	26.22	9.94	14.59	19335	ENSMUSG00000004768	Rab23	RAB23/ member RAS oncogene family
Rab11a	721.34	451.52	650.36	340.96	341.7	426.98	237.46	268.87	404.61	428.83	449.81	394.18	774.42	433.47	443.39	319.36	420.68	427.56	240.63	164.96	255.57	332.51	353.35	387.16	481.88	504.1	231.35	424.28	317.78	849.68	314.57	620.65	456.31	315.66	274.08	359.24	463.32	635.1	53869	ENSMUSG00000004771	Rab11a	RAB11A/ member RAS oncogene family
Eif2b2	554.24	667.58	924.34	182.99	280.97	548.35	251.47	246.32	215.86	101.66	127.69	97.41	236.48	196.2	318.09	156.88	106.91	182.11	587.87	145.39	100.94	138.12	127.5	130.97	198.12	149.29	159.21	19	255.55	149.35	214.71	228.96	175.5	152.81	160.84	118	168.93	94.3	217715	ENSMUSG00000004788	Eif2b2	eukaryotic translation initiation factor 2B/ subunit 2 beta
Dlst	507.36	599.94	624.76	300.81	424.18	544.02	468.27	595.42	636.53	362.97	425.11	406.54	350.83	310.27	330.94	338.97	232.42	395.89	335.05	181.74	229.01	244.81	293.24	306.29	363.59	433.81	218.91	566.76	238.57	244.07	302.09	359.15	161.46	147.78	127.19	140.73	140.36	137.24	78920	ENSMUSG00000004789	Dlst	dihydrolipoamide S-succinyltransferase (E2 component of 2-oxo-glutarate complex)
Pgf	1283.3	1622.6	1584.65	169.16	87.92	377.13	5.9	8.24	7.03	11.45	18.61	6.94	145.53	54.75	0	28.01	9.3	11.08	130.98	0	0.56	3.65	0	1.04	0	5.36	0	0	0	0	0	0	2.34	1.51	0	0	1.24	1.68	18654	ENSMUSG00000004791	Pgf	placental growth factor
Ulk2	55.15	83.92	106.18	83.59	92.45	54.19	180.67	253.26	373.48	77.32	70.9	69.67	83.16	68.44	67.47	72.84	120.86	123.52	48.74	397.02	242.15	179.77	171.21	166.45	265.61	374.23	74.63	50.66	36.78	124.4	101.53	77.44	117	152.81	191.2	135.48	116.76	213.29	29869	ENSMUSG00000004798	Ulk2	unc-51 like kinase 2
Ccl24	11.58	0.63	2.37	43.44	1.81	75.86	240.41	232.88	306.22	0.72	0	0.3	57.17	182.51	44.98	14.01	0	310.37	405.11	67.1	49.49	21.19	18.21	20.35	21.05	15.4	3201.55	3283.39	4356.53	1873.33	2391.72	2120.1	1053.02	517.23	213.35	953.61	1013.59	701.62	56221	ENSMUSG00000004814	Ccl24	chemokine (C-C motif) ligand 24
Dgkq	48.53	45.09	82.95	50.68	57.1	54.19	45.72	59.85	74.3	35.44	34.01	28.65	23.39	68.44	16.06	5.6	27.89	1.58	27.41	55.92	55.92	42.39	40.07	39.13	76.93	47.53	0	25.33	71.67	29.36	11.65	28.06	30.42	24.63	18.87	16.61	40.99	46.87	110524	ENSMUSG00000004815	Dgkq	diacylglycerol kinase/ theta
Grap	0	0.63	4.27	35.54	21.75	21.67	13.27	10.41	20.08	6.8	6.74	2.11	109.15	18.25	102.82	112.06	2.32	126.68	106.61	629.09	530.16	850.63	881.55	505.09	597.99	631.3	1057.23	1621.11	729.86	717.06	880.46	1296.3	585.01	551.41	430.81	928.27	876.95	438.37	71520	ENSMUSG00000004837	Grap	GRB2-related adaptor protein
Chmp2b	96.51	185.37	105.71	78.99	70.7	65.02	78.17	95.84	67.27	124.57	128.33	89.57	142.93	141.45	41.77	61.63	111.56	134.6	33.51	64.31	100.66	66.5	38.25	69.92	66.04	72.97	82.09	31.66	40.55	128.51	68.24	88.66	107.64	84.44	95.19	105.76	94.4	113.66	68942	ENSMUSG00000004843	Chmp2b	charged multivesicular body protein 2B
Plod3	191.92	176.6	173.02	555.54	450.46	435.65	308.99	261.93	300.19	1402.13	1513.7	1769.43	337.83	173.39	366.28	579.89	343.98	354.71	691.43	1358.83	1318.42	1384.83	1508.1	1134.36	1244.61	1438.67	315.93	753.56	333.81	405.1	381.14	589.23	486.73	427.25	384.04	477.24	452.14	323.59	26433	ENSMUSG00000004846	Plod3	procollagen-lysine/ 2-oxoglutarate 5-dioxygenase 3
Ap1s1	188.06	231.08	251.7	366.63	324.48	357.62	215.33	217.27	135.54	376.57	463.93	344.42	161.12	219.02	321.3	154.08	211.5	207.44	502.58	234.86	230.41	276.24	271.39	247.85	124.1	218.91	174.13	66.49	256.49	252.91	390.3	204.27	175.5	305.61	226.48	386.34	311.78	184.67	11769	ENSMUSG00000004849	Ap1s1	adaptor protein complex AP-1/ sigma 1
Mapk13	90.99	33.82	22.28	266.58	145.02	182.06	0.74	0	1	0	0	0.3	0	0	0	0	0	6.33	0	0	0	0.73	0	3.65	0	0.67	52.24	0	2.83	9.79	17.48	30.3	0	7.54	4.92	0.87	1.24	1.12	26415	ENSMUSG00000004864	Mapk13	mitogen-activated protein kinase 13
Srpk1	76.66	130.89	92.91	135.59	125.99	99.7	134.95	121.43	106.42	135.67	152.08	143.86	114.34	296.58	32.13	204.5	120.86	136.18	167.53	111.84	128.91	119.85	149.35	123.14	87.81	82.34	64.68	79.16	88.64	101.04	94.87	92.03	37.44	140.24	123.09	97.02	109.31	74.09	20815	ENSMUSG00000004865	Srpk1	serine/arginine-rich protein specific kinase 1
Pax3	23.71	13.78	15.64	0.66	0	0	0	0	0	0	0.32	0	0	0	0	0	0	0	0	0	0	0	0	0	0	0	0	0	9.43	0	0	0	0	0	0	0	0	0	18505	ENSMUSG00000004872	Pax3	paired box 3
Lbr	8.27	16.28	9.48	69.11	32.63	28.18	30.97	43.37	93.37	11.45	10.27	6.63	51.97	0	118.88	58.83	32.54	36.42	30.46	30.76	30.2	23.39	51	31.83	36.29	39.5	24.88	0	60.35	72.94	76.56	54.99	107.64	122.65	108.32	124.12	96.89	190	98386	ENSMUSG00000004880	Lbr	lamin B receptor
Crabp2	5.51	19.41	7.58	0	0	0	0.74	1.73	0	0	0	0.6	38.98	0	0	0	0	0	0	0	0	0	0	0	0	0	0	0	1.89	3.47	0	0	0	0	0	2.62	0	0.56	12904	ENSMUSG00000004885	Crabp2	cellular retinoic acid binding protein II
Nes	3.31	0	0	5.27	2.72	4.33	0	0	0	2.86	0	0	0	0	218.48	207.3	453.22	235.95	109.65	61.51	42.22	3.65	5.46	29.22	0.73	0.67	0	0	0.94	9.79	26.63	8.98	74.88	219.66	187.09	83.04	145.33	27.22	18008	ENSMUSG00000004891	Nes	nestin
Bcan	0	0	0	1.32	0	0	0	0	0	0	0.32	0	0	0	0	0	0	0	0	0	2.24	2.19	0	2.09	2.18	0	0	0	0	0	0	0	0	0	0	0	0	0	12032	ENSMUSG00000004892	Bcan	brevican
Prcc	1.65	1.88	1.42	8.56	6.34	3.25	2.95	5.64	2.01	2.86	5.13	3.32	0	0	0	0	0	14.25	0	50.33	15.38	7.31	10.93	7.83	10.89	6.03	12.44	0	20.75	13.58	9.15	2.24	11.7	14.58	11.49	20.1	9.94	9.26	94315	ENSMUSG00000004895	Prcc	papillary renal cell carcinoma (translocation-associated)
Rrnad1	72.8	72.64	106.65	69.77	52.57	88.86	178.46	160.46	248.99	63.36	63.2	57.6	124.74	164.26	115.67	84.04	120.86	80.76	155.34	321.53	281.02	165.89	191.24	195.67	191.59	293.22	92.04	145.65	78.27	69.46	33.29	38.16	128.7	81.93	66.47	64.68	58.38	90.37	229503	ENSMUSG00000004896	Rrnad1	ribosomal RNA adenine dimethylase domain containing 1
Hdgf	880.17	638.14	694.44	669.41	474.03	602.54	386.42	362.11	420.67	665.45	614.4	697.88	504.15	269.21	385.56	369.78	397.44	310.37	466.03	204.1	263.96	330.31	275.03	286.46	273.6	368.87	452.74	405.28	400.76	373.53	387.8	419.76	582.67	422.73	434.09	532.31	450.9	590.48	15191	ENSMUSG00000004897	Hdgf	heparin binding growth factor
Slc25a18	0	0	0	0	0	0	0	0	0	0	0	0	0	0	0	0	0	0	0	0	0	0	0	0	1.45	0	0	0	4.71	0	0	0	0	0	0	0	0	0	71803	ENSMUSG00000004902	Slc25a18	solute carrier family 25 (mitochondrial carrier)/ member 18
Thop1	32.54	15.66	15.17	55.29	33.54	37.93	73.01	21.68	5.02	16.47	47.16	22.62	181.91	0	70.69	33.62	32.54	31.67	48.74	64.31	52.01	38	74.68	47.48	12.34	22.76	34.83	91.82	15.09	41.05	54.92	42.65	11.7	78.41	64.01	119.75	115.52	14.59	50492	ENSMUSG00000004929	Thop1	thimet oligopeptidase 1
Apba3	48.53	48.22	25.12	55.95	64.35	41.18	49.41	81.96	54.22	36.15	57.43	60.92	51.97	50.19	0	92.45	51.13	50.67	88.33	75.49	84.45	65.04	54.64	45.4	95.79	137.91	203.98	256.47	123.53	150.61	223.03	167.23	53.82	31.67	53.34	83.91	59.62	57.81	57267	ENSMUSG00000004931	Apba3	amyloid beta (A4) precursor protein-binding/ family A/ member 3
Matk	41.36	77.03	74.42	184.3	246.53	109.45	61.94	85.87	59.24	3.58	5.45	2.71	18.19	0	195.99	50.42	118.54	199.53	386.84	662.64	580.77	781.21	726.73	590.14	720.64	771.22	199.01	12.66	249.89	216.6	259.64	216.61	182.52	227.2	237.15	120.62	192.53	119.84	17179	ENSMUSG00000004933	Matk	megakaryocyte-associated tyrosine kinase
Pias4	173.17	263.65	173.49	179.04	140.49	127.88	201.32	125.76	58.23	151.06	155.28	190.3	257.27	292.02	244.19	324.96	357.93	159.94	60.92	494.88	317.09	308.39	224.03	237.41	152.4	140.59	609.46	193.14	181.99	288.28	222.2	246.91	180.18	304.1	268.33	342.64	259.61	156.04	59004	ENSMUSG00000004934	Pias4	protein inhibitor of activated STAT 4
Map2k1	286.77	348.19	342.72	343.59	358.92	404.22	143.8	264.97	236.94	293.17	300.62	468.67	350.83	396.97	186.35	277.34	267.29	224.86	118.79	120.23	267.6	241.89	187.6	284.89	621.94	548.29	136.82	79.16	108.44	205.87	150.63	243.55	238.68	203.57	210.89	166.07	211.16	323.59	26395	ENSMUSG00000004936	Map2k1	mitogen-activated protein kinase kinase 1
Sgta	153.31	392.03	146.95	299.49	378.86	186.4	483.02	255.86	216.86	349.37	539.64	385.73	176.71	314.84	372.71	271.73	174.32	188.44	539.13	592.74	374.13	593.4	632.02	524.92	228.6	435.82	203.98	186.81	414.91	256.07	344.53	362.52	140.4	683.6	585.9	562.9	654.61	275.88	52551	ENSMUSG00000004937	Sgta	small glutamine-rich tetratricopeptide repeat (TPR)-containing/ alpha
Nmrk2	2.21	0	0	0	0	0	0	0	0	0	0	0	0	0	0	0	0	0	0	0	0	0	0	0	0	0	0	0	7.54	0	0	0	0	0	0	0	0	0	69564	ENSMUSG00000004939	Nmrk2	nicotinamide riboside kinase 2
Tmem242	109.75	165.33	146.95	203.39	135.96	131.13	140.85	81.1	81.32	182.2	179.03	174.02	311.85	246.39	350.22	296.95	406.74	213.78	298.5	83.88	130.58	94.27	103.82	108.01	52.25	109.79	549.76	224.8	106.56	171.45	279.62	241.3	210.6	180.95	181.35	205.41	211.16	227.32	70544	ENSMUSG00000004945	Tmem242	transmembrane protein 242
Dtx2	48.53	83.92	48.82	148.1	106.95	158.22	171.82	139.64	162.65	65.86	64.49	87.16	57.17	0	64.26	22.41	44.16	123.52	237.58	190.12	136.18	166.62	205.82	153.93	97.25	168.03	164.18	265.96	180.11	189.13	222.2	244.67	119.34	244.79	161.66	213.27	244.7	96.82	74198	ENSMUSG00000004947	Dtx2	deltex 2/ E3 ubiquitin ligase
Zp3	0	1.25	0	0	0	0	0	0	0	0	0	0	0	0	0	0	0	0	0	0	0	0	0	0	0	0	0	0	0	1.58	0	0	0	1.01	0	0	0	0	22788	ENSMUSG00000004948	Zp3	zona pellucida glycoprotein 3
Hspb1	607.18	166.58	124.67	57.27	94.26	138.71	0.74	0	0	0	0.32	0.3	223.49	54.75	170.29	162.48	274.26	1722.89	874.19	13.98	2.24	1.46	0	1.57	7.98	9.37	2462.73	3600.01	5428.69	4600.45	3077.45	8814.86	6194.08	2717.32	1051.99	3049.64	3284.22	833.52	15507	ENSMUSG00000004951	Hspb1	heat shock protein 1
Rasa4	16.54	10.65	0	502.88	870.11	542.94	1271.35	1314	668.66	28.28	21.18	22.92	44.18	59.32	854.65	403.4	574.08	486.15	801.08	740.92	838.31	549.55	748.59	900.6	764.91	911.81	293.54	132.98	411.14	453.1	452.71	561.17	243.36	295.56	384.86	208.03	252.15	179.33	54153	ENSMUSG00000004952	Rasa4	RAS p21 protein activator 4
Syt5	1.65	7.51	0	1.32	0	0	3.69	3.47	0	1.07	5.13	0.3	0	0	0	0	0	0	0	0	0	0	0	4.7	0	0	0	0	0	0	0	10.1	0	0	0	0	0	0	53420	ENSMUSG00000004961	Syt5	synaptotagmin V
Hnrnpa2b1	1422.27	1608.2	1610.72	841.87	1310.61	910.31	891.57	1359.97	1074.27	893.82	1044.64	785.64	1055.08	985.57	742.2	812.4	1022.66	785.44	868.1	1014.93	841.1	743.94	876.08	769.11	1272.91	1308.13	584.59	630.08	868.48	1047.34	675.74	702.59	1095.14	842.94	875.57	1212.34	869.5	1415.58	53379	ENSMUSG00000004980	Hnrnpa2b1	heterogeneous nuclear ribonucleoprotein A2/B1
Fxyd4	0	0	0	0.66	0	3.25	0	0	0	0	0	0	0	0	0	0	0	0	0	0	0	0	0	1.04	0	0	0	0	0	0	0	0	0	0	0	0	0	0	108017	ENSMUSG00000004988	Fxyd4	FXYD domain-containing ion transport regulator 4
Ccdc130	28.13	45.09	33.66	40.15	65.26	37.93	50.15	37.73	44.18	28.99	47.16	39.51	5.2	22.81	12.85	44.82	20.92	28.5	30.46	61.51	50.33	82.58	58.28	54.27	56.61	87.03	111.94	0	77.32	59.99	32.46	69.59	21.06	53.28	80.42	53.32	55.9	55.57	67736	ENSMUSG00000004994	Ccdc130	coiled-coil domain containing 130
Mri1	212.87	145.29	146	92.15	91.54	86.7	112.83	62.88	52.21	187.57	228.76	217.15	218.29	219.02	122.09	81.24	127.83	101.35	243.68	109.04	107.37	71.62	85.6	125.75	99.42	49.54	57.21	19	72.61	86.52	81.55	85.3	154.44	160.34	119.81	92.65	113.03	48.83	67873	ENSMUSG00000004996	Mri1	methylthioribose-1-phosphate isomerase 1
Prkacb	232.73	212.3	206.2	202.73	248.34	224.33	209.43	220.3	297.18	114.9	84.38	81.13	296.25	237.27	382.35	212.9	257.99	163.1	149.25	170.55	169.17	116.93	118.39	146.1	211.18	210.88	475.13	310.29	379.07	370.37	344.53	219.98	229.32	284	234.69	315.54	358.98	512.74	18749	ENSMUSG00000005034	Prkacb	protein kinase/ cAMP dependent/ catalytic/ beta
Sgsh	48.53	75.78	71.58	129.67	173.12	131.13	184.36	139.64	214.85	5.01	1.6	4.52	31.18	18.25	48.19	114.86	83.67	95.01	9.14	78.29	73.54	97.92	138.42	91.31	97.97	137.91	144.28	170.98	311.18	175.24	154.79	122.34	28.08	56.3	42.67	63.81	100.61	66.23	27029	ENSMUSG00000005043	Sgsh	N-sulfoglucosamine sulfohydrolase (sulfamidase)
Chd5	2.21	2.5	8.53	0.66	2.72	0	0	0	0	51.55	57.75	30.76	0	0	0	0	0	0	21.32	2.8	1.96	0	5.46	1.04	0	0	0	3.17	0.94	0.63	6.66	11.22	0	0.5	4.1	5.24	1.24	0.28	269610	ENSMUSG00000005045	Chd5	chromodomain helicase DNA binding protein 5
Cstb	509.57	318.13	524.27	867.54	1042.32	975.33	477.86	387.69	490.95	1998.84	1725.77	1783.91	506.75	501.91	623.32	577.08	685.64	1133.82	2068.2	142.59	128.91	159.31	136.6	208.71	310.61	174.06	547.27	851.72	1244.72	1614.1	1144.26	1333.34	753.49	443.84	333.98	426.55	565.17	806.02	13014	ENSMUSG00000005054	Cstb	cystatin B
Sh2b2	405.89	524.79	349.35	71.75	141.39	158.22	19.17	18.21	1	134.59	205.01	220.76	106.55	123.2	115.67	84.04	104.59	104.51	85.29	422.19	315.41	393.89	437.13	516.05	474.62	634.65	0	12.66	53.75	110.83	54.09	42.65	42.12	54.29	94.37	55.07	32.3	16.56	23921	ENSMUSG00000005057	Sh2b2	SH2B adaptor protein 2
Pex5	34.74	16.28	32.71	48.71	26.28	29.26	28.76	37.73	43.17	32.93	27.91	46.44	33.78	27.38	102.82	28.01	23.24	15.84	0	36.35	30.48	24.12	32.78	27.13	23.22	24.1	57.21	132.98	49.03	43.26	23.3	30.3	16.38	26.14	18.87	17.48	32.3	52.48	19305	ENSMUSG00000005069	Pex5	peroxisomal biogenesis factor 5
Jkamp	159.38	180.99	149.32	215.9	127.8	188.56	175.51	108.42	148.59	220.86	196.35	155.62	215.69	127.76	189.57	291.34	104.59	104.51	204.08	274	337.5	440.66	417.1	323.51	254.73	249.71	216.42	193.14	123.53	117.14	161.45	115.6	65.52	158.84	133.76	145.97	144.09	186.35	104771	ENSMUSG00000005078	Jkamp	JNK1/MAPK8-associated membrane protein
Cd44	795.24	689.5	685.43	672.7	490.35	462.74	855.43	786.67	917.64	2407.99	2373.86	2834.65	1624.2	821.31	639.38	540.67	483.44	467.14	858.96	13.98	3.08	1.46	9.11	37.05	13.06	10.71	360.7	34.83	354.56	372.58	254.65	317.62	425.89	427.75	338.08	383.72	324.2	449.32	12505	ENSMUSG00000005087	Cd44	CD44 antigen
Slc1a2	0	0	0	1.32	0	0	25.81	19.51	18.07	0.72	0	0.3	0	0	0	0	0	0	0	0	1.4	0	1.82	0.52	0	0	0	0	0	0	0	0	0	0	0.82	0	0	0	20511	ENSMUSG00000005089	Slc1a2	solute carrier family 1 (glial high affinity glutamate transporter)/ member 2
Eif2ak4	43.57	48.22	52.62	35.54	29.91	39.01	101.03	89.33	114.45	73.74	66.41	57.91	15.59	41.07	28.92	33.62	65.08	26.92	18.28	44.74	47.82	42.39	30.96	57.4	90.71	44.18	29.85	6.33	20.75	32.84	23.3	23.57	30.42	24.63	30.36	10.49	8.69	16.56	27103	ENSMUSG00000005102	Eif2ak4	eukaryotic translation initiation factor 2 alpha kinase 4
Wdr1	539.35	495.36	679.27	356.1	413.3	482.25	451.31	420.65	451.79	788.23	729.9	687.93	769.22	889.75	491.59	322.16	350.96	359.46	225.4	97.86	187.07	192.2	253.17	280.72	253.28	307.28	233.84	449.61	329.1	455.31	309.58	331.09	437.59	269.42	255.2	300.68	233.52	367.09	22388	ENSMUSG00000005103	Wdr1	WD repeat domain 1
Slc2a9	6.07	9.39	0.47	19.75	25.38	23.84	8.85	7.37	1	37.94	22.78	25.03	0	0	9.64	11.21	2.32	30.09	18.28	27.96	48.37	24.85	40.07	26.09	36.29	54.23	42.29	85.49	32.06	35.68	47.43	20.2	30.42	18.1	11.49	6.99	14.91	18.52	117591	ENSMUSG00000005107	Slc2a9	solute carrier family 2 (facilitated glucose transporter)/ member 9
Ccn4	0	0	0	0	0	0	0	0	0	0	0	0	0	0	0	0	0	0	0	0	0	0	0	0	0	0	0	0	0	0	0	0	0	0	0	0	9.94	0	22402	ENSMUSG00000005124	Ccn4	cellular communication network factor 4
Ndrg1	5542.95	4969.89	6056.55	98.08	52.57	119.21	0.74	1.73	19.08	28.64	12.51	21.11	306.65	219.02	28.92	50.42	65.08	7.92	33.51	0	0	0	1.82	0.52	2.9	25.44	0	0	5.66	10.42	7.49	19.08	18.72	17.59	5.74	13.99	7.45	16.28	17988	ENSMUSG00000005125	Ndrg1	N-myc downstream regulated gene 1
4930550C14Rik	0.55	1.88	0	0.66	0	2.17	0	0.43	0	0	0	0	0	0	0	0	0	0	0	0	0.28	0	1.82	0.52	0	0	0	0	0	0.95	0	4.49	0	0	0	0	1.24	0.56	75311	ENSMUSG00000005131	4930550C14Rik	RIKEN cDNA 4930550C14 gene
Man2b1	657.92	950.64	852.76	2440.69	3597.38	3185	7423.81	5963.74	3861.34	1991.68	2730.94	2432.63	1787.91	1907.26	6879	3367.26	3646.7	3993.69	5065.41	4300.15	3456.69	3292.17	4200.1	3840.86	3398.54	4743.8	1985.11	3527.19	3683.25	2512.41	2938.47	2567.92	3222.23	3159.65	3110.85	3359.94	3597.24	4170.69	17159	ENSMUSG00000005142	Man2b1	mannosidase 2/ alpha B1
Klf5	74.45	29.43	17.54	288.3	107.86	135.46	0	0	1	0.36	0.32	0	278.06	27.38	64.26	0	58.11	14.25	0	0	0	0.73	0	0	0	0	0	0	6.6	6.95	4.16	0	0	2.01	0	3.5	0	0.28	12224	ENSMUSG00000005148	Klf5	Kruppel-like factor 5
Wdr83	49.08	36.95	40.29	89.52	108.76	98.62	115.04	95.41	107.43	36.87	56.47	56.4	124.74	155.14	38.56	75.64	106.91	69.68	106.61	95.06	86.68	71.62	132.96	101.23	81.28	115.15	94.53	44.33	127.3	58.41	98.2	86.42	60.84	124.15	105.04	134.61	105.58	77.46	67836	ENSMUSG00000005150	Wdr83	WD repeat domain containing 83
Prdx2	839.91	594.93	761.75	636.5	717.84	648.05	903.36	828.73	691.75	787.15	811.07	599.86	701.65	1026.64	629.74	462.23	513.65	848.78	871.14	215.29	318.49	319.35	355.17	365.77	412.21	348.79	791.06	446.44	744	817.47	916.24	978.68	685.63	459.92	384.04	522.7	618.59	471.49	21672	ENSMUSG00000005161	Prdx2	peroxiredoxin 2
Polr2a	397.62	204.16	446.05	398.88	338.08	352.2	325.21	402.87	472.88	810.78	641.99	834.2	145.53	264.64	205.63	159.68	153.4	182.11	143.16	128.61	347.29	163.7	153	286.98	288.11	342.76	410.46	275.46	299.86	201.45	165.61	245.79	374.41	269.92	352.85	293.69	198.74	429.39	20020	ENSMUSG00000005198	Polr2a	polymerase (RNA) II (DNA directed) polypeptide A
Shbg	0	0	0	0.66	0	0	0	0	0	0	0	0	0	0	0	0	0	0	0	0	0	0	0	0	0	0	0	0	0	0	0	0	0	0	0	0	0	0	20415	ENSMUSG00000005202	Shbg	sex hormone binding globulin
Senp3	51.84	70.14	57.83	144.81	171.3	124.63	232.29	257.6	177.71	135.67	187.37	215.03	57.17	118.63	61.05	70.03	60.43	47.51	73.1	120.23	142.05	114	167.57	94.44	64.59	87.7	134.33	174.14	120.7	71.67	70.74	81.93	93.6	57.8	67.29	87.41	80.74	121.52	80886	ENSMUSG00000005204	Senp3	SUMO/sentrin specific peptidase 3
Corin	0	0	0	0	0	0	0	0	0	0	0	0	0	0	0	0	0	0	0	8.39	0	0	0	0	0	0	0	0	0	0	0	0	0	0	0	0	0	0	53419	ENSMUSG00000005220	Corin	corin/ serine peptidase
Plekha8	3.86	1.88	0.47	11.85	9.97	21.67	14.01	7.81	10.04	6.44	3.53	4.22	0	0	6.43	16.81	4.65	9.5	21.32	58.71	30.76	12.42	23.68	13.04	22.5	23.43	14.93	12.66	10.37	7.58	18.31	15.71	4.68	9.05	11.49	24.47	14.91	20.21	231999	ENSMUSG00000005225	Plekha8	pleckstrin homology domain containing/ family A (phosphoinositide binding specific) member 8
Spc25	22.06	11.9	18.96	11.19	14.5	34.68	6.64	21.68	8.03	11.81	20.21	10.56	0	9.13	0	0	6.97	11.08	9.14	27.96	6.71	3.65	5.46	2.09	0	0.67	0	0	1.89	13.89	3.33	20.2	25.74	18.1	9.85	16.61	36.02	29.19	66442	ENSMUSG00000005233	Spc25	SPC25/ NDC80 kinetochore complex component/ homolog (S, cerevisiae)
Dnah2	87.69	72.02	137.47	83.59	68.88	117.04	138.64	164.79	214.85	3.22	1.28	1.51	0	13.69	0	0	0	9.5	12.18	8.39	1.68	2.19	0	3.13	0.73	6.69	0	9.5	0	11.37	0	7.86	0	10.56	13.13	0	6.21	3.37	327954	ENSMUSG00000005237	Dnah2	dynein/ axonemal/ heavy chain 2
Ripk4	15.99	5.01	13.27	5.92	0	15.17	0	0	0	0	0	0	0	0	0	0	0	0	0	0	0	0	0	0	0	0	0	0	0	0	0	0	0	0	0	0	0	0	72388	ENSMUSG00000005251	Ripk4	receptor-interacting serine-threonine kinase 4
Ufd1	387.69	287.45	474.49	203.39	150.46	188.56	171.82	184.74	189.75	229.45	199.88	224.69	181.91	155.14	160.65	95.25	165.02	133.02	152.3	150.98	147.92	154.93	153	199.32	286.66	266.45	154.23	427.44	163.13	136.09	136.48	81.93	201.24	103.04	168.22	112.76	150.3	218.9	22230	ENSMUSG00000005262	Ufd1	ubiquitin recognition factor in ER-associated degradation 1
Zfp287	2.76	14.4	9.01	6.58	4.53	3.25	12.54	3.47	2.01	1.79	4.17	2.41	5.2	31.94	0	5.6	0	9.5	0	27.96	16.5	9.5	1.82	8.35	15.97	7.36	0	15.83	9.43	1.58	1.66	0	28.08	7.54	9.03	0	2.48	5.89	170740	ENSMUSG00000005267	Zfp287	zinc finger protein 287
Prlr	16.54	5.01	1.9	9.87	0	0	0	0	0	0.72	0.96	0	0	0	0	2.8	0	0	0	0	0.56	0	0	0	0.73	0	0	0	0	0	0	0	0	0	0	0	0	0	19116	ENSMUSG00000005268	Prlr	prolactin receptor
Letm1	226.11	207.29	199.09	308.71	327.2	403.14	264.74	235.05	338.34	291.74	297.09	295.26	265.07	50.19	260.25	156.88	176.64	133.02	149.25	299.17	375.25	217.77	276.85	245.76	293.19	285.19	223.88	392.61	204.62	166.08	260.48	170.6	255.06	220.16	216.64	212.4	291.9	135.55	56384	ENSMUSG00000005299	Letm1	leucine zipper-EF-hand containing transmembrane protein 1
Ubqln1	269.12	304.98	326.6	172.45	238.37	166.89	367.98	401.14	245.98	378.72	515.9	571.51	246.88	442.59	221.7	308.15	155.72	194.78	127.93	162.16	206.36	230.93	267.74	232.19	159.66	193.47	69.65	75.99	202.74	185.34	147.3	126.82	126.36	169.9	119.81	151.21	140.36	169.23	56085	ENSMUSG00000005312	Ubqln1	ubiquilin 1
Fgfr4	0	0	0.47	4.61	6.34	0	0	0	0	0	0.96	0.3	0	0	0	0	0	0	0	0	0	0	0	0	0	0	0	0	0	0	0	0	0	0	0	0	0	0	14186	ENSMUSG00000005320	Fgfr4	fibroblast growth factor receptor 4
Cadm3	152.21	92.06	87.22	11.85	2.72	0	0.74	1.3	0	0	0	0	0	86.69	3.21	0	0	0	12.18	0	0.56	0	0	0	0	0	0	0	0	0.63	4.16	0	0	5.53	14.77	0	0	0	94332	ENSMUSG00000005338	Cadm3	cell adhesion molecule 3
Txn2	510.67	559.86	591.1	947.84	465.87	635.05	612.81	405.91	417.66	896.33	811.39	912.01	1023.89	584.04	623.32	680.74	534.57	549.49	654.88	366.27	313.18	380.01	300.53	369.42	248.92	231.63	915.44	1063.86	619.53	977.87	793.08	913.59	928.99	645.9	810.74	901.17	794.97	685.34	56551	ENSMUSG00000005354	Txn2	thioredoxin 2
Casp14	12.68	0	0	1.32	0	0	0	0	0	0	0	0	0	0	0	0	0	0	0	0	0	0	0	0	0	0	0	0	0	0	0	0	0	0	0	0	0	0	12365	ENSMUSG00000005355	Casp14	caspase 14
Slc1a3	0	1.88	0	1.32	11.78	1.08	413.7	418.05	540.15	22.55	13.48	13.87	0	0	0	0	0	0	0	780.07	631.11	808.25	757.69	419.51	399.15	502.1	0	0	0	0	0	0	0	3.02	0.82	0	0	0	20512	ENSMUSG00000005360	Slc1a3	solute carrier family 1 (glial high affinity glutamate transporter)/ member 3
Crbn	55.7	93.94	67.31	53.32	56.19	37.93	89.97	121.43	108.43	60.14	45.24	25.64	124.74	45.63	25.7	47.62	69.73	63.34	12.18	81.08	88.08	111.81	114.75	103.84	144.42	160.67	82.09	0	55.64	39.78	43.27	39.28	16.38	49.26	73.85	75.17	69.56	143.97	58799	ENSMUSG00000005362	Crbn	cereblon
Il5ra	0	0	0	0	0	0	0	0	0	0	0	0	7.8	0	0	5.6	0	0	0	0	0	0	0	0	0	0	0	0	0	0.32	0	0	2.34	0	1.64	0	0	0	16192	ENSMUSG00000005364	Il5ra	interleukin 5 receptor/ alpha
Msh6	52.39	59.49	31.76	21.72	36.25	70.44	40.56	62.88	132.53	36.51	23.42	30.46	5.2	0	0	47.62	55.78	99.76	51.78	16.78	35.79	39.46	41.89	48.53	44.99	103.77	57.21	0	21.69	24.63	34.95	19.08	72.54	37.7	50.06	36.71	29.81	71.56	17688	ENSMUSG00000005370	Msh6	mutS homolog 6
Fbxo11	49.63	145.29	83.43	70.43	39.88	7.59	67.11	73.29	31.12	57.63	45.56	44.03	77.96	4.56	6.43	58.83	27.89	71.26	21.32	109.04	91.44	81.85	83.78	80.35	57.33	101.76	17.41	0	6.6	52.41	54.92	84.18	58.5	91.98	88.62	76.92	80.74	136.11	225055	ENSMUSG00000005371	Fbxo11	F-box protein 11
Mlxipl	0	5.64	0	24.35	9.06	7.59	5.16	0	6.02	6.09	3.21	0	0	0	0	0	0	3.17	0	869.54	1340.23	1471.07	1464.39	2076.7	1779.46	2189.81	0	0	0	6.63	0	0	9.36	3.02	3.28	6.12	8.69	8.14	58805	ENSMUSG00000005373	Mlxipl	MLX interacting protein-like
Tbl2	22.06	16.28	24.65	48.05	25.38	35.76	35.4	73.72	42.17	29.71	41.07	34.08	57.17	9.13	25.7	42.02	46.48	6.33	33.51	95.06	92	92.08	51	105.4	129.9	127.87	0	34.83	46.21	30.94	6.66	65.1	81.9	47.75	16.41	51.57	28.57	47.71	27368	ENSMUSG00000005374	Tbl2	transducin (beta)-like 2
Bud23	354.6	238.6	333.24	228.4	220.25	282.85	194.68	252.83	229.91	201.89	217.85	243.69	142.93	237.27	176.71	86.84	139.45	164.69	103.56	271.21	263.68	255.04	245.89	281.76	362.86	276.49	37.31	120.32	143.33	214.39	178.92	205.39	266.76	134.71	141.14	202.79	140.36	140.32	66138	ENSMUSG00000005378	Bud23	BUD23/ rRNA methyltransferase and ribosome maturation factor
Nid1	0	0	0	5.27	1.81	5.42	0	0	0	0	0	0.3	0	0	0	0	0	1.58	0	0	0	0	0	0	0	0	0	0	0	1.89	0	0	4.68	3.02	5.74	0	8.69	30.31	18073	ENSMUSG00000005397	Nid1	nidogen 1
Mcm5	55.15	82.04	36.03	47.39	67.98	173.39	59.73	51.17	100.4	85.55	71.23	45.84	75.36	200.76	141.37	64.43	118.54	183.69	152.3	22.37	34.11	29.23	40.07	42.26	51.53	37.49	131.84	19	42.43	57.47	38.28	68.46	243.36	133.7	91.91	128.49	121.73	91.21	17218	ENSMUSG00000005410	Mcm5	minichromosome maintenance complex component 5
Hmox1	71.14	54.48	17.06	1117.66	948.97	907.06	29029.3	24724.4	26488.2	677.97	834.17	909.6	51.97	237.27	729.35	330.56	306.8	1566.12	584.82	109.04	83.05	168.08	171.21	171.15	169.82	224.94	1007.48	3077.58	7639.01	5137.86	2740.41	3059.5	6849.29	3071.18	2607.83	2693.89	3235.78	4817.59	15368	ENSMUSG00000005413	Hmox1	heme oxygenase 1
Mprip	307.73	247.99	348.88	208	183.09	228.66	192.47	176.93	160.64	200.1	150.47	196.03	270.27	77.57	160.65	100.85	37.19	69.68	179.71	114.63	154.07	139.58	116.57	175.84	211.18	210.21	99.5	370.45	209.34	188.5	148.96	217.73	154.44	179.95	150.17	156.46	146.57	186.91	26936	ENSMUSG00000005417	Mprip	myosin phosphatase Rho interacting protein
Cic	589.53	635.01	561.24	518.02	390.64	415.06	303.83	266.7	290.15	555.19	374.41	444.24	790.01	1140.71	973.53	479.04	378.85	717.34	740.17	726.94	851.73	713.24	883.37	756.59	581.3	817.41	402.99	642.75	429.99	534.56	788.92	808.09	744.13	501.64	602.31	482.49	399.97	463.91	71722	ENSMUSG00000005442	Cic	capicua transcriptional repressor
Pafah1b3	405.34	211.04	263.56	219.19	135.05	158.22	67.84	72.42	44.18	153.21	160.74	147.48	696.46	538.41	446.6	260.53	395.12	177.36	435.57	164.96	140.65	196.58	158.46	219.15	212.64	140.59	169.16	79.16	230.08	269.33	324.55	277.22	248.04	251.32	177.25	166.95	163.96	92.05	18476	ENSMUSG00000005447	Pafah1b3	platelet-activating factor acetylhydrolase/ isoform 1b/ subunit 3
Il27ra	4.41	0	0.47	4.61	13.6	13	0.74	9.97	0	34.36	29.2	25.33	0	0	0	5.6	0	6.33	21.32	5.59	5.59	5.12	0	0.52	7.26	4.02	0	0	4.71	19.89	15.81	24.69	53.82	14.58	7.39	3.5	1.24	7.86	50931	ENSMUSG00000005465	Il27ra	interleukin 27 receptor/ alpha
Prkaca	153.31	150.3	151.21	200.1	139.58	139.8	157.07	112.32	57.23	239.83	169.08	199.05	15.59	82.13	44.98	176.49	92.97	52.26	188.85	109.04	160.5	132.27	129.32	165.93	116.12	179.42	59.7	75.99	158.42	91.57	94.04	83.05	114.66	135.21	93.55	112.76	113.03	187.47	18747	ENSMUSG00000005469	Prkaca	protein kinase/ cAMP dependent/ catalytic/ alpha
Asf1b	68.94	36.95	48.35	26.99	17.22	46.6	16.22	37.73	31.12	66.94	46.52	43.13	72.76	0	80.32	67.23	16.27	19	30.46	5.59	7.27	9.5	12.75	12.52	12.34	5.36	0	0	7.54	46.73	24.13	14.59	35.1	34.68	27.9	34.96	39.75	56.41	66929	ENSMUSG00000005470	Asf1b	anti-silencing function 1B histone chaperone
Myl10	0	0	0	0	0	0	0	0	0	0	0	0	0	0	0	0	0	0	0	0	0	0	0	0	0	0	0	0	0	0	0	0	0	0	0	0	0	1.12	59310	ENSMUSG00000005474	Myl10	myosin/ light chain 10/ regulatory
Ddx39	209.01	137.15	148.84	221.16	174.02	223.24	215.33	179.97	278.1	181.84	196.03	217.75	59.77	127.76	67.47	36.42	118.54	55.42	24.37	95.06	127.79	111.81	98.35	153.93	148.05	163.35	116.92	161.48	144.27	160.4	96.53	90.91	119.34	110.58	102.57	87.41	80.74	115.91	68278	ENSMUSG00000005481	Ddx39	DEAD (Asp-Glu-Ala-Asp) box polypeptide 39
Dnajb1	705.9	661.94	910.12	840.55	978.88	760.76	114.3	162.19	232.93	166.09	200.52	176.13	1081.06	282.9	1214.51	1504.34	1759.43	5661.16	3399.28	150.98	167.21	227.27	176.67	186.8	348.35	383.6	1460.23	2542.49	3128.78	2974.03	2806.98	4125.72	4921.1	5805.59	4027.45	2714.87	3292.92	2304.39	81489	ENSMUSG00000005483	Dnajb1	DnaJ heat shock protein family (Hsp40) member B1
Msh4	0	0	0	0	0	0	0	0	0	0	0	0.3	0	0	0	0	0	0	0	0	0	0	0	0	0	0	0	0	0	0	0	0	0	0	0	0	0	0	55993	ENSMUSG00000005493	Msh4	mutS homolog 4
Usp40	18.2	49.47	42.19	49.37	36.25	31.43	77.43	44.67	96.38	44.39	41.71	48.86	57.17	27.38	112.45	8.4	55.78	47.51	82.24	195.72	150.72	120.58	160.28	103.31	82.01	103.77	101.99	47.49	37.72	35.36	54.09	51.63	37.44	67.86	60.72	42.83	68.32	81.11	227334	ENSMUSG00000005501	Usp40	ubiquitin specific peptidase 40
Evx1	6.62	10.02	9.01	0.66	0	0	0	0	0	0	0	0	0	0	0	0	0	0	0	0	0	0	0	0	0	0	0	0	0	0	0	0	0	0	0	0	0	0	14028	ENSMUSG00000005503	Evx1	even-skipped homeobox 1
Kbtbd4	24.82	43.84	31.29	57.27	41.69	42.26	75.96	107.11	128.51	50.83	54.22	47.65	31.18	73.01	32.13	56.03	53.46	53.84	0	55.92	102.34	107.43	107.46	85.57	119.02	138.58	27.36	37.99	20.75	44.84	31.62	47.14	56.16	49.26	39.39	55.07	43.47	64.27	67136	ENSMUSG00000005505	Kbtbd4	kelch repeat and BTB (POZ) domain containing 4
Celf1	185.3	220.44	244.12	150.73	209.37	180.98	239.67	243.72	304.21	183.27	110.05	159.54	241.68	146.01	128.52	277.34	185.94	153.6	88.33	436.17	618.52	405.58	511.81	298.46	494.94	280.5	97.02	164.64	91.47	227.02	203.89	176.21	131.04	176.93	230.59	178.31	181.35	209.64	13046	ENSMUSG00000005506	Celf1	CUGBP/ Elav-like family member 1
Ndufs3	43.02	56.99	58.78	119.8	67.98	60.69	87.76	60.71	26.1	78.75	91.76	99.83	135.13	95.82	86.75	173.69	195.23	41.17	161.44	64.31	74.1	80.39	58.28	103.31	39.19	36.15	57.21	231.14	170.68	214.71	95.7	136.93	28.08	66.85	81.24	114.5	113.03	54.16	68349	ENSMUSG00000005510	Ndufs3	NADH:ubiquinone oxidoreductase core subunit S3
Por	201.29	148.42	128.46	280.4	271.91	165.81	883.45	1099.34	702.79	370.49	422.54	608.61	181.91	410.65	208.84	72.84	72.05	207.44	210.17	405.41	287.45	298.16	309.63	272.89	224.97	235.65	651.75	161.48	298.92	253.86	250.49	176.21	161.46	169.39	145.24	210.65	208.68	150.43	18984	ENSMUSG00000005514	Por	P450 (cytochrome) oxidoreductase
Igf1r	4.41	6.26	14.69	9.87	10.88	1.08	0.74	0	1	2.15	0.64	2.41	0	0	0	0	0	0	30.46	39.14	13.42	10.96	10.93	16.7	2.9	18.08	0	0	16.03	11.68	13.32	11.22	23.4	15.08	13.13	7.87	9.94	7.02	16001	ENSMUSG00000005533	Igf1r	insulin-like growth factor I receptor
Insr	71.14	82.66	114.71	35.54	45.32	20.59	98.82	175.2	167.67	83.4	79.57	76.6	10.39	0	9.64	120.46	2.32	20.59	21.32	69.9	59.84	41.65	52.82	54.27	53.7	52.89	34.83	0	21.69	46.41	32.46	28.06	23.4	57.3	53.34	41.96	29.81	72.41	16337	ENSMUSG00000005534	Insr	insulin receptor
Fcer2a	6.62	3.13	3.32	0.66	0.91	0	0	5.64	0	5.37	3.53	3.02	10.39	0	0	0	0	0	0	0	0.28	0	0	0	0	0	0	0	0	0	0	0	11.7	38.2	19.69	0	6.21	0	14128	ENSMUSG00000005540	Fcer2a	Fc receptor/ IgE/ low affinity II/ alpha polypeptide
Cyp2a5	1.65	0	0	0	0	0	0	0	0	0.36	0	0.3	0	0	0	0	0	0	0	0	0	0	0	0	0	0	0	0	0	0	0	0	0	0	0	0	0	0	13087	ENSMUSG00000005547	Cyp2a5	cytochrome P450/ family 2/ subfamily a/ polypeptide 5
Atp4a	11.03	19.41	17.06	0	0	0	0	0	0	0	0	0	0	0	0	0	0	0	0	0	0	0	0	0	0	0	0	0	0	0	0	0	0	0	0	0	0	0	11944	ENSMUSG00000005553	Atp4a	ATPase/ H+/K+ exchanging/ gastric/ alpha polypeptide
Trim28	458.28	412.07	439.89	427.19	320.85	407.47	415.92	382.92	407.62	393.04	408.42	396.29	735.44	95.82	713.28	361.38	299.82	326.21	874.19	374.66	499.4	488.16	530.02	559.35	869.41	757.83	136.82	462.27	417.74	291.75	302.09	456.79	680.95	364.92	333.16	358.37	347.8	315.45	21849	ENSMUSG00000005566	Trim28	tripartite motif-containing 28
Ube2m	372.8	384.51	374.48	392.3	226.59	282.85	370.19	233.74	245.98	404.85	365.43	332.05	608.1	552.1	565.49	210.1	309.12	311.96	639.65	349.49	391.75	457.47	395.24	402.82	211.91	237.66	1067.18	870.72	411.14	306.59	475.18	461.28	245.7	367.94	372.55	555.91	449.66	295.52	22192	ENSMUSG00000005575	Ube2m	ubiquitin-conjugating enzyme E2M
Adcy9	1.65	3.76	3.32	13.16	16.31	1.08	7.37	5.2	0	2.15	0.96	0.6	0	0	0	70.03	16.27	22.17	3.05	89.47	130.3	104.5	89.25	48	23.22	22.76	89.55	34.83	43.38	60.31	133.98	70.71	2.34	62.33	46.77	56.81	33.54	20.21	11515	ENSMUSG00000005580	Adcy9	adenylate cyclase 9
Mef2c	5.51	11.9	1.42	144.15	158.61	113.79	8.11	8.67	28.11	12.17	12.19	4.52	31.18	27.38	388.77	826.41	657.75	387.97	265	1277.74	1022.86	811.17	887.01	640.75	537.76	607.87	310.95	288.13	393.22	413.31	323.72	290.69	234	505.16	403.73	371.48	395	492.54	17260	ENSMUSG00000005583	Mef2c	myocyte enhancer factor 2C
Ctr9	105.88	118.36	75.84	81.62	87.01	102.95	117.25	107.55	145.58	120.63	122.56	119.13	77.96	159.7	115.67	11.21	137.13	47.51	137.07	198.51	222.02	115.46	165.75	116.88	87.81	151.3	37.31	37.99	148.05	87.46	36.62	125.7	67.86	116.61	147.71	75.17	131.67	110.57	22083	ENSMUSG00000005609	Ctr9	CTR9 homolog/ Paf1/RNA polymerase II complex component
Eif4g2	270.23	837.29	334.18	585.82	687.03	343.53	498.51	573.3	458.82	900.62	832.89	665.91	420.99	278.33	134.95	355.78	525.27	616	380.74	578.76	579.66	609.47	686.66	532.74	452.12	780.59	308.46	75.99	215.94	523.51	262.97	369.25	334.63	606.7	598.21	652.06	537.85	921.64	13690	ENSMUSG00000005610	Eif4g2	eukaryotic translation initiation factor 4/ gamma 2
Mrvi1	0.55	1.88	2.84	9.87	1.81	9.75	0	0	0	0	0.32	0	109.15	0	0	0	0	19	0	2.8	0.56	0.73	0	1.57	5.81	0	74.63	53.83	84.87	126.62	133.98	176.21	140.4	123.65	144.42	93.53	165.2	181.3	17540	ENSMUSG00000005611	Mrvi1	MRV integration site 1
Pcyt1a	65.63	101.45	98.6	125.72	177.65	147.38	52.36	54.64	50.2	146.05	82.45	98.32	140.33	109.51	157.44	308.15	116.21	136.18	88.33	64.31	69.07	34.35	60.11	31.83	76.93	49.54	79.6	0	99.95	247.86	184.75	142.54	119.34	135.21	130.47	107.51	89.43	118.71	13026	ENSMUSG00000005615	Pcyt1a	phosphate cytidylyltransferase 1/ choline/ alpha isoform
Zfp592	71.69	150.93	182.5	133.62	209.37	192.9	216.07	255.43	267.06	158.22	134.11	144.76	137.73	63.88	279.53	210.1	102.27	85.51	127.93	159.37	239.92	164.43	171.21	233.24	212.64	301.26	149.26	126.65	198.97	117.46	194.73	123.46	117	209.1	164.94	184.43	155.27	137.8	233410	ENSMUSG00000005621	Zfp592	zinc finger protein 592
Psmd4	750.02	707.66	671.69	616.76	526.6	493.09	661.48	496.11	422.68	524.05	699.74	617.96	992.71	1966.58	835.38	899.24	913.42	736.35	773.67	721.35	554.49	567.09	484.49	471.69	458.65	430.46	803.5	1203.17	982.58	681.07	919.57	713.81	603.73	691.64	649.91	770.93	699.33	451.28	19185	ENSMUSG00000005625	Psmd4	proteasome (prosome/ macropain) 26S subunit/ non-ATPase/ 4
Tmod4	0.55	0.63	6.64	0.66	5.44	1.08	5.16	9.11	10.04	0.36	2.25	7.54	0	0	0	0	0	0	0	16.78	4.47	0.73	0	8.87	0	16.74	17.41	0	1.89	5.68	8.32	0	0	0	6.56	0	11.18	2.81	50874	ENSMUSG00000005628	Tmod4	tropomodulin 4
Insrr	0	0	0	7.9	3.63	2.17	0	0	0	0.36	0	0	0	0	0	0	0	0	0	0	0	0	0	0	0	0	0	174.14	0	0	0	0	0	0	0	0	0	0	23920	ENSMUSG00000005640	Insrr	insulin receptor-related receptor
Snx6	236.59	186	188.66	273.16	373.42	456.24	377.57	510.42	483.92	192.58	207.26	168.59	319.64	269.21	401.62	397.8	332.36	351.55	374.65	413.8	499.4	374.89	298.71	406.99	592.91	571.72	763.7	1051.19	934.48	997.76	742.32	732.89	599.05	550.9	521.89	787.54	766.4	652.78	72183	ENSMUSG00000005656	Snx6	sorting nexin 6
Mthfd2	175.37	157.19	226.58	62.53	34.44	43.35	23.6	12.14	10.04	110.97	81.49	69.06	246.88	246.39	86.75	123.26	123.18	98.18	85.29	11.18	98.15	45.31	72.86	111.14	54.43	31.46	0	0	1.89	12.95	4.16	56.12	30.42	42.73	35.29	36.71	22.36	22.73	17768	ENSMUSG00000005667	Mthfd2	methylenetetrahydrofolate dehydrogenase (NAD+ dependent)/ methenyltetrahydrofolate cyclohydrolase
Kit	31.43	30.69	24.65	17.77	2.72	26.01	0	1.73	2.01	1.07	0	0.3	176.71	91.26	0	0	0	0	6.09	0	0	0.73	0	0	0	0.67	0	0	0	0	0	0	0	1.01	6.56	0	0	0	16590	ENSMUSG00000005672	Kit	KIT proto-oncogene receptor tyrosine kinase
Tomm40l	57.35	60.75	37.92	82.28	88.82	101.87	109.88	101.91	115.46	70.88	84.7	74.49	57.17	91.26	57.83	47.62	90.64	53.84	85.29	19.57	46.14	46.04	61.93	68.88	44.27	46.86	74.63	189.97	98.07	121.25	104.02	59.48	88.92	55.29	54.16	54.19	75.77	81.39	641376	ENSMUSG00000005674	Tomm40l	translocase of outer mitochondrial membrane 40-like
Nr1i3	0	0	0	0.66	0	0	0	0	0	0	0	0	0	0	0	0	0	0	0	0	0	0	0	0	0	0	0	0	0	0	0	0	0	0	0	0	0	0	12355	ENSMUSG00000005677	Nr1i3	nuclear receptor subfamily 1/ group I/ member 3
Apoa2	1.1	8.14	8.06	12.51	3.63	7.59	7.37	4.34	0	2.51	2.57	1.81	0	0	0	28.01	0	0	0	0	0	8.77	21.86	2.61	0	2.01	0	0	0	0.32	0	0	0	3.52	1.64	0	0	0	11807	ENSMUSG00000005681	Apoa2	apolipoprotein A-II
Pan2	79.96	89.55	113.29	46.73	60.73	48.77	64.89	97.57	85.34	30.07	19.25	22.62	33.78	0	16.06	2.8	41.84	26.92	15.23	36.35	49.77	42.39	63.75	58.96	66.77	49.54	64.68	41.16	49.98	44.2	30.79	24.69	30.42	25.64	15.59	14.86	13.66	28.63	103135	ENSMUSG00000005682	Pan2	PAN2 poly(A) specific ribonuclease subunit
Cs	527.22	355.08	415.24	462.73	394.27	442.15	328.9	365.14	371.48	739.19	567.56	547.39	626.29	387.84	215.27	327.76	299.82	418.06	365.51	128.61	182.31	166.62	131.14	233.24	402.05	311.3	415.43	243.8	276.29	253.86	287.94	318.74	475.03	199.55	224.84	200.16	199.98	327.52	12974	ENSMUSG00000005683	Cs	citrate synthase
Ampd3	47.98	63.25	71.58	49.37	59.82	72.61	143.06	267.14	338.34	137.81	126.09	140.54	64.97	0	0	8.4	13.95	0	6.09	53.12	50.61	45.31	83.78	50.09	86.36	76.32	139.31	19	28.29	81.46	74.07	75.2	37.44	57.3	88.62	84.79	79.5	111.42	11717	ENSMUSG00000005686	Ampd3	adenosine monophosphate deaminase 3
Bcas2	199.64	127.13	135.57	171.8	183.09	244.92	185.1	209.46	221.88	203.68	204.37	179.14	207.9	209.89	131.73	182.09	241.72	117.18	51.78	97.86	146.52	151.27	136.6	145.58	222.8	127.87	111.94	158.31	224.43	231.76	158.12	94.28	212.94	117.62	115.7	178.31	193.77	245.29	68183	ENSMUSG00000005687	Bcas2	breast carcinoma amplified sequence 2
Sh2d1a	0	0	0	0	0.91	0	0	1.3	0	0	0	0	7.8	0	0	0	0	0	0	0	0	0	0	0	0	0	0	0	0	0	0	0	0	1.51	3.28	0	0	0	20400	ENSMUSG00000005696	Sh2d1a	SH2 domain containing 1A
Ctcf	199.64	175.98	204.3	150.07	149.55	133.3	146.75	160.89	120.48	156.43	138.6	162.56	200.1	282.9	314.87	355.78	425.33	299.29	127.93	522.84	529.6	206.81	233.14	153.4	181.43	168.7	350.75	284.96	134.84	198.92	357.01	337.82	173.16	320.69	273.26	336.52	283.21	186.63	13018	ENSMUSG00000005698	Ctcf	CCCTC-binding factor
Pard6a	80.52	93.31	51.67	34.23	30.82	55.27	33.18	26.45	20.08	32.22	34.65	37.7	0	9.13	0	58.83	53.46	38.01	85.29	83.88	24.61	38.73	25.5	33.92	41.37	39.5	19.9	12.66	68.84	36	61.58	41.53	49.14	32.67	41.85	52.44	45.96	20.21	56513	ENSMUSG00000005699	Pard6a	par-6 family cell polarity regulator alpha
Agrp	10.48	0	0.47	0	0	0	0	0	0	0.36	0	0	0	0	0	0	0	0	0	0	0	0	0	0	0	0	0	0	5.66	0	0	17.96	0	0	0	0	0	0	11604	ENSMUSG00000005705	Agrp	agouti related neuropeptide
Pvalb	0	0	0	0	0	0	0	0	0	0	0	0	0	0	0	0	0	0	0	0	0	0.73	0	0	0	0	0	101.32	1.89	0	0	0	0	0	0	0	0	0	19293	ENSMUSG00000005716	Pvalb	parvalbumin
Tfap4	0	3.13	1.9	12.51	11.78	2.17	13.27	14.74	6.02	9.66	3.85	3.32	0	0	32.13	0	11.62	4.75	3.05	0	21.53	31.42	16.39	14.61	13.79	12.05	2.49	12.66	9.43	20.21	20.8	3.37	4.68	10.05	6.56	9.61	7.45	14.31	83383	ENSMUSG00000005718	Tfap4	transcription factor AP4
Ranbp1	453.32	175.35	230.37	171.14	206.65	229.75	143.06	158.29	206.82	347.22	293.56	245.8	275.46	337.65	417.69	294.15	436.95	156.77	118.79	156.57	153.51	151.27	145.71	187.84	148.05	130.54	159.21	338.79	248.94	271.86	151.46	163.86	367.39	224.68	234.69	291.94	270.79	206.28	19385	ENSMUSG00000005732	Ranbp1	RAN binding protein 1
Cd247	2.21	1.88	0	0.66	0.91	0	2.21	2.6	0	6.09	9.95	2.11	0	0	0	0	0	0	0	0	0	0	0	0	0.73	0	0	0	0	0.32	0	0	14.04	10.56	4.92	0	2.48	0.56	12503	ENSMUSG00000005763	Cd247	CD247 antigen
Rfx5	106.99	93.31	97.65	35.54	38.97	32.51	46.46	31.66	81.32	15.75	14.44	22.32	12.99	4.56	12.85	25.21	23.24	22.17	24.37	33.55	32.16	36.54	23.68	33.39	68.94	67.62	0	0	5.66	27.15	7.49	23.57	9.36	17.09	41.85	25.35	12.42	23.01	53970	ENSMUSG00000005774	Rfx5	regulatory factor X/ 5 (influences HLA class II expression)
Psmb4	1710.7	1407.17	1688.46	778.68	1623.31	1312.36	616.5	862.99	809.21	786.79	987.85	906.28	1242.18	876.06	1339.81	860.02	755.37	1159.15	1136.14	408.21	412.72	484.51	508.16	565.09	1201.06	935.24	1325.89	1614.78	1135.34	1572.11	926.23	1066.22	1095.14	572.52	584.26	789.29	673.24	734.17	19172	ENSMUSG00000005779	Psmb4	proteasome (prosome/ macropain) subunit/ beta type 4
Mmp8	0	0	0	7.24	2.72	0	7.37	0	0	164.3	126.41	101.94	0	0	0	0	13.95	7.92	0	0	0	0	0	1.57	0	0	0	0	0	0.95	0	0	0	0	0	6.99	0	0.56	17394	ENSMUSG00000005800	Mmp8	matrix metallopeptidase 8
Slc30a4	36.95	114.6	45.03	28.3	15.41	4.33	2.95	0	0	0.36	1.6	0.6	88.36	31.94	0	5.6	16.27	0	3.05	25.16	22.93	21.19	25.5	32.87	10.16	28.79	0	44.33	11.32	12.31	4.99	10.1	18.72	12.06	21.34	13.99	7.45	39.85	22785	ENSMUSG00000005802	Slc30a4	solute carrier family 30 (zinc transporter)/ member 4
Sqor	138.97	131.51	133.67	276.45	211.18	338.12	129.05	175.63	212.85	226.95	242.87	218.05	54.57	68.44	118.88	210.1	104.59	164.69	42.64	78.29	178.4	230.2	280.49	291.68	413.66	431.8	72.14	101.32	101.84	185.03	154.79	142.54	187.2	121.64	149.35	139.85	172.66	261	59010	ENSMUSG00000005803	Sqor	sulfide quinone oxidoreductase
Bloc1s6	87.13	78.28	32.23	105.32	160.43	84.53	66.37	115.79	65.26	81.26	106.84	65.14	155.92	82.13	0	30.82	32.54	125.1	15.23	55.92	48.93	73.08	76.5	64.18	64.59	119.16	34.83	0	56.58	81.46	91.54	88.66	126.36	61.83	70.57	58.56	78.25	131.9	18457	ENSMUSG00000005804	Bloc1s6	biogenesis of lysosomal organelles complex-1/ subunit 6/ pallidin
Metap1	98.16	81.41	126.56	65.16	85.2	70.44	70.06	78.06	86.34	47.97	50.69	73.89	38.98	45.63	22.49	39.22	55.78	33.25	54.83	61.51	52.57	70.16	54.64	86.09	143.69	74.31	14.93	19	65.07	64.73	57.42	35.91	18.72	26.64	32	40.21	49.69	87	75624	ENSMUSG00000005813	Metap1	methionyl aminopeptidase 1
Gpr108	253.13	213.55	207.15	381.77	300.01	267.67	412.23	300.09	200.8	330.75	436.34	376.69	304.05	328.52	257.04	437.02	109.24	224.86	371.61	447.35	348.69	394.62	506.34	432.56	234.41	331.38	159.21	687.07	289.49	219.45	300.42	227.84	224.64	286.01	237.97	285.82	285.69	233.5	78308	ENSMUSG00000005823	Gpr108	G protein-coupled receptor 108
Tnfsf14	0	0	0	11.85	19.03	2.17	0.74	0.87	0	4.65	4.81	13.57	18.19	27.38	35.34	8.4	13.95	1.58	6.09	0	1.4	0	3.64	1.04	0	0	27.36	60.16	15.09	22.1	0	1.12	9.36	19.6	11.49	25.35	4.97	10.1	50930	ENSMUSG00000005824	Tnfsf14	tumor necrosis factor (ligand) superfamily/ member 14
Gata6	4.41	0	0	31.59	0	18.42	0	0.43	0	0.36	0	0.3	0	0	0	0	0	0	0	0	0	0	10.93	0	0	0	0	0	0	0	0	0	0	1.01	0.82	0	3.73	5.89	14465	ENSMUSG00000005836	Gata6	GATA binding protein 6
Rsl1d1	172.61	153.43	69.21	129.01	156.8	145.22	132	196.88	226.9	190.43	209.51	178.84	114.34	132.32	89.96	75.64	144.1	110.85	118.79	187.33	152.95	157.12	112.93	198.28	240.21	218.91	59.7	183.64	77.32	127.88	126.49	147.03	53.82	98.52	112.42	109.26	103.1	103.84	66409	ENSMUSG00000005846	Rsl1d1	ribosomal L1 domain containing 1
Cnga2	0	0	0	0	0	0	0	0	0	0	0	0	0	0	0	0	0	0	0	0	1.4	1.46	9.11	1.04	0	2.68	0	0	0	0	0	0	0	0	0	0	0	0	12789	ENSMUSG00000005864	Cnga2	cyclic nucleotide gated channel alpha 2
Apc	50.74	56.36	60.67	78.99	116.92	119.21	90.71	118.82	141.56	44.03	34.65	44.94	179.31	22.81	48.19	184.89	37.19	79.18	109.65	262.82	192.1	104.5	123.85	77.75	135.71	89.71	199.01	79.16	65.07	114.93	80.72	102.13	21.06	129.68	141.96	145.97	104.34	133.31	11789	ENSMUSG00000005871	Apc	APC/ WNT signaling pathway regulator
Reep5	1029.62	1274.41	1101.62	779.34	670.71	628.55	2191.67	2087.22	1296.15	2353.94	2519.84	2624.44	1382.52	2231.22	983.17	1173.78	1447.99	940.62	1888.49	701.78	622.44	963.17	872.44	863.03	862.88	911.81	2089.59	1975.73	1444.63	1059.02	1184.21	1304.16	924.31	866.57	951.06	1274.4	1243.38	1047.94	13476	ENSMUSG00000005873	Reep5	receptor accessory protein 5
Ergic3	256.44	469.68	324.7	487.09	393.36	308.86	467.54	287.09	103.41	373.71	441.79	425.85	644.48	337.65	886.78	400.6	713.54	552.66	980.8	710.17	731.49	1156.1	1100.11	699.19	502.92	456.57	942.8	1706.6	647.82	475.83	634.96	860.84	496.09	543.36	521.89	581.26	658.34	678.04	66366	ENSMUSG00000005881	Ergic3	ERGIC and golgi 3
Uqcc1	75.55	60.12	71.1	63.85	88.82	59.6	78.91	94.1	57.23	46.53	53.26	52.78	54.57	0	67.47	78.44	30.21	114.02	48.74	50.33	50.61	67.96	54.64	77.22	77.65	91.05	49.75	47.49	75.44	55.26	74.07	109.99	14.04	52.78	56.62	27.1	42.23	44.9	56046	ENSMUSG00000005882	Uqcc1	ubiquinol-cytochrome c reductase complex assembly factor 1
Spo11	0	0	0	0.66	0	2.17	0.74	5.64	11.04	0	0	0	0	0	0	0	0	0	0	0	0	0	0	0	0	0	0	0	0	0	0	0	0	0	0.82	0	0	0	26972	ENSMUSG00000005883	Spo11	SPO11 meiotic protein covalently bound to DSB
Ncoa2	61.21	103.33	66.84	53.97	87.01	58.52	117.99	109.28	93.37	65.86	58.07	56.7	231.29	54.75	54.62	84.04	27.89	82.34	103.56	198.51	167.77	83.31	114.75	70.96	62.41	79.67	99.5	19	20.75	59.99	79.06	84.18	51.48	121.14	109.96	92.65	100.61	103	17978	ENSMUSG00000005886	Ncoa2	nuclear receptor coactivator 2
Nr2c2	46.88	58.24	43.61	55.95	44.41	54.19	63.42	65.92	101.4	70.16	42.35	35.59	2.6	273.77	3.21	64.43	39.51	63.34	48.74	176.14	154.63	117.66	129.32	64.7	92.89	126.53	19.9	69.66	42.43	47.99	72.4	75.2	16.38	80.42	88.62	59.44	58.38	78.3	22026	ENSMUSG00000005893	Nr2c2	nuclear receptor subfamily 2/ group C/ member 2
Nr2c1	19.3	6.89	13.27	19.75	32.63	7.59	29.5	46.4	54.22	26.49	34.65	22.32	12.99	0	0	22.41	30.21	19	21.32	39.14	44.18	38	58.28	35.48	34.11	46.19	37.31	0	11.32	27.15	27.46	42.65	23.4	22.12	35.29	32.34	38.51	52.2	22025	ENSMUSG00000005897	Nr2c1	nuclear receptor subfamily 2/ group C/ member 1
Smpd4	70.59	80.79	59.25	46.73	48.94	41.18	65.63	58.54	60.24	39.02	42.99	47.05	77.96	13.69	32.13	25.21	79.02	99.76	48.74	106.25	79.97	55.54	71.03	60.53	68.22	94.39	17.41	15.83	85.81	85.57	65.74	28.06	28.08	49.26	31.18	38.46	52.17	29.19	77626	ENSMUSG00000005899	Smpd4	sphingomyelin phosphodiesterase 4
Pex1	43.02	29.43	54.51	30.28	25.38	32.51	42.77	40.33	31.12	27.56	21.5	20.51	0	0	12.85	58.83	48.81	14.25	12.18	44.74	45.3	30.69	18.21	27.13	40.64	28.79	57.21	79.16	21.69	18.94	24.13	33.67	14.04	15.08	18.87	13.99	14.91	28.63	71382	ENSMUSG00000005907	Pex1	peroxisomal biogenesis factor 1
Otx1	0.55	1.25	0	0	0	0	0	0	0	0	0	0	0	0	0	0	0	0	0	0	0	0	0	0	0	0	0	0	0	0	0	0	0	0	0	0	0	0	18423	ENSMUSG00000005917	Otx1	orthodenticle homeobox 1
Kctd20	99.82	90.81	111.87	97.42	106.95	128.96	90.71	70.69	88.35	161.8	166.51	161.95	18.19	31.94	93.18	50.42	76.7	57.01	45.69	30.76	62.36	69.42	109.28	91.83	98.7	145.27	94.53	155.15	108.44	64.41	63.25	97.64	79.56	47.25	46.77	70.8	52.17	65.11	66989	ENSMUSG00000005936	Kctd20	potassium channel tetramerisation domain containing 20
Itgae	56.25	55.74	54.99	1.32	9.06	0	0.74	0	7.03	0.72	1.6	0	18.19	0	0	0	0	0	0	5.59	28.52	12.42	12.75	18.26	22.5	28.79	0	0	0	0	0	0	7.02	5.03	0	0	1.24	0	16407	ENSMUSG00000005947	Itgae	integrin alpha E/ epithelial-associated
Ctns	61.21	41.96	61.62	125.06	90.64	125.71	126.84	85.87	81.32	181.13	173.57	173.41	25.99	22.81	67.47	33.62	41.84	45.92	24.37	81.08	131.7	188.54	136.6	148.71	113.94	174.06	34.83	98.15	142.39	74.2	77.39	85.3	77.22	55.79	49.24	41.08	37.26	160.25	83429	ENSMUSG00000005949	Ctns	cystinosis/ nephropathic
P2rx5	335.3	388.9	412.87	1.32	0	2.17	5.9	0.43	12.05	58.35	59.68	63.33	428.79	1017.51	3.21	2.8	13.95	0	36.55	0	0	0	0	1.04	0.73	0.67	0	0	0	0	0	0	0	0.5	0	0	0	0	94045	ENSMUSG00000005950	P2rx5	purinergic receptor P2X/ ligand-gated ion channel/ 5
Shpk	14.34	18.79	5.69	11.19	14.5	16.26	29.5	13.01	15.06	19.33	25.99	23.52	0	36.5	0	0	0	0	0	2.8	13.14	18.27	9.11	19.31	13.06	18.74	0	0	5.66	8.21	0	4.49	0	6.03	4.92	1.75	0	3.09	74637	ENSMUSG00000005951	Shpk	sedoheptulokinase
Trpv1	0	0	0	0	0	0	0.74	0	0	0	0	0.3	0	0	0	0	0	0	0	0	0	0	0	0	0	0	0	0	0	1.89	0	0	0	0	0	0	0	0	193034	ENSMUSG00000005952	Trpv1	transient receptor potential cation channel/ subfamily V/ member 1
Ephb3	6.62	11.27	5.69	19.09	6.34	13	0	1.73	0	0	0.64	0	0	0	0	0	2.32	0	0	61.51	46.7	27.77	29.14	34.96	21.77	22.76	0	0	0	0	0	0	0	2.51	0	2.62	6.21	0.56	13845	ENSMUSG00000005958	Ephb3	Eph receptor B3
Tuft1	91.55	31.31	27.02	39.49	38.97	20.59	11.8	6.5	3.01	0.72	5.45	4.83	18.19	0	6.43	2.8	0	23.75	3.05	8.39	3.91	19.73	0	14.61	7.26	12.72	37.31	3.17	115.99	80.52	58.25	79.69	28.08	23.62	9.03	22.73	26.08	59.78	22156	ENSMUSG00000005968	Tuft1	tuftelin 1
Rcn1	6.62	4.38	1.9	17.77	19.94	0	46.46	48.14	26.1	0.72	0	0	15.59	0	0	2.8	0	19	0	25.16	25.17	24.85	32.78	24	34.83	26.11	0	63.32	0	5.37	0	10.1	16.38	6.53	6.56	6.99	13.66	6.17	19672	ENSMUSG00000005973	Rcn1	reticulocalbin 1
Dnase1	0	0	0	0	0	0	2.21	0	0	0	0	0	0	0	0	0	0	0	0	0	0	0	0	0	0	0	0	0	0	0	0	0	0	0	0	0	0	0	13419	ENSMUSG00000005980	Dnase1	deoxyribonuclease I
Trap1	153.31	229.21	191.98	119.8	218.43	183.15	204.27	216.83	162.65	191.51	280.41	193.32	122.14	214.45	138.16	64.43	120.86	188.44	225.4	97.86	109.61	91.35	127.5	135.66	210.46	245.69	82.09	104.49	138.62	98.2	161.45	142.54	142.74	133.2	118.16	105.76	124.21	99.91	68015	ENSMUSG00000005981	Trap1	TNF receptor-associated protein 1
Naa60	461.59	488.47	482.55	518.02	591.86	450.82	501.46	621.87	620.46	778.92	720.27	688.23	1083.66	438.03	671.51	344.57	348.63	503.57	338.1	338.31	422.23	619.7	619.27	544.22	655.32	858.25	654.24	734.57	717.6	601.18	444.39	469.14	793.27	387.54	429.99	505.21	439.72	788.34	74763	ENSMUSG00000005982	Naa60	N(alpha)-acetyltransferase 60/ NatF catalytic subunit
1700037C18Rik	46.88	38.2	23.7	20.4	24.47	20.59	32.45	31.22	14.06	11.1	13.15	4.52	59.77	269.21	0	16.81	55.78	45.92	3.05	64.31	43.06	110.35	114.75	47.48	84.18	41.51	129.36	3.17	4.71	49.26	26.63	21.32	21.06	43.73	58.26	56.81	75.77	15.44	73261	ENSMUSG00000005983	1700037C18Rik	RIKEN cDNA 1700037C18 gene
Ankrd13d	34.19	41.33	36.03	36.2	45.32	42.26	59	54.21	32.13	13.24	24.7	14.17	5.2	86.69	16.06	0	32.54	3.17	51.78	92.27	60.68	94.27	116.57	56.87	50.8	107.78	0	31.66	58.46	23.68	22.47	19.08	28.08	60.32	73.85	44.58	47.2	30.03	68423	ENSMUSG00000005986	Ankrd13d	ankyrin repeat domain 13 family/ member D
Tyrp1	0	0	0	0	0	0	0	0	0	0.36	0	0	0	0	0	0	0	0	0	0	0	0	0	0	0	0	0	0	0	0	0	0	0	0	0	0	0	0	22178	ENSMUSG00000005994	Tyrp1	tyrosinase-related protein 1
Tpr	361.77	448.39	481.6	441.67	568.29	568.94	542.02	692.56	696.77	465.7	309.28	358.29	613.3	342.21	610.47	885.24	1227.19	756.93	204.08	531.23	497.17	236.77	258.64	205.58	240.21	257.74	1567.19	1171.51	473.37	942.19	679.07	667.79	711.37	1019.37	1142.26	1166.89	1127.86	836.61	108989	ENSMUSG00000006005	Tpr	translocated promoter region/ nuclear basket protein
Pdc	0	0	0	0	0	0	0	0	0	0	0	0	0	0	0	0	0	0	0	0	0	0	0	0	0	0	0	0	0	2.21	0	1.12	0	0	0	0	0	0	20028	ENSMUSG00000006007	Pdc	phosducin
Odr4	122.43	170.97	124.67	203.39	206.65	148.47	202.8	323.51	282.12	127.43	132.5	105.56	148.13	182.51	147.8	179.29	248.69	356.3	21.32	215.29	257.81	236.77	256.81	253.59	296.09	230.29	412.94	316.62	157.48	259.86	205.55	223.35	208.26	345.32	228.12	258.73	309.29	330.6	226499	ENSMUSG00000006010	Odr4	odr4 GPCR localization factor homolog
Prg4	0	0	0.47	0	0.91	0	0	0.87	1	0	0.32	0.6	12.99	0	0	42.02	25.57	3.17	0	0	0	0	0	0	0	0	0	0	11.32	6	7.49	0	0	0.5	5.74	9.61	0	8.98	96875	ENSMUSG00000006014	Prg4	proteoglycan 4 (megakaryocyte stimulating factor/ articular superficial zone protein)
Dhx34	49.63	65.13	57.83	123.75	116.02	105.12	286.13	147.45	148.59	62.28	63.53	70.87	46.78	141.45	83.54	47.62	65.08	53.84	6.09	215.29	169.73	219.97	224.03	171.67	82.73	151.3	0	240.63	212.17	92.51	130.65	102.13	53.82	119.63	132.94	82.16	94.4	75.77	71723	ENSMUSG00000006019	Dhx34	DEAH (Asp-Glu-Ala-His) box polypeptide 34
Kptn	25.37	53.86	53.09	44.1	92.45	100.78	81.12	91.07	75.3	50.11	49.09	37.1	119.54	95.82	51.41	56.03	65.08	36.42	42.64	83.88	70.74	35.08	56.46	58.96	48.62	64.27	42.29	9.5	121.64	78.62	99.03	49.38	56.16	98.52	71.39	44.58	58.38	35.08	70394	ENSMUSG00000006021	Kptn	kaptin
Napa	862.52	616.23	925.76	570.02	876.46	891.89	811.18	936.71	768.05	728.45	921.12	746.74	756.23	410.65	1265.92	781.59	771.64	1301.67	1519.93	685	491.02	685.47	712.16	663.71	932.55	964.02	669.17	972.04	918.45	664.02	894.61	852.98	1322.12	830.88	517.79	721.11	847.14	415.08	108124	ENSMUSG00000006024	Napa	N-ethylmaleimide sensitive fusion protein attachment protein alpha
Sra1	438.98	330.03	469.28	223.8	182.18	287.18	145.28	133.13	195.78	304.27	296.77	280.48	267.67	159.7	109.24	448.22	320.74	259.7	344.19	111.84	103.74	158.58	134.78	165.93	154.58	132.55	286.07	227.97	158.42	346.06	212.21	260.38	215.28	186.99	224.84	186.18	219.86	182.7	24068	ENSMUSG00000006050	Sra1	steroid receptor RNA activator 1
Calcoco2	0	0	0	0	0	0	0	0	0	0.72	0	0	0	0	0	0	0	0	0	0	0	0	0	0	0	0	0	0	0	0	0	0	0	0	0	0	0	0	76815	ENSMUSG00000006056	Calcoco2	calcium binding and coiled-coil domain 2
Atp5g1	875.2	394.53	698.71	514.73	405.15	753.17	193.95	171.3	371.48	475.73	419.65	417.7	1177.22	1127.02	697.22	1081.33	769.32	677.76	1254.93	287.98	152.11	187.08	109.28	188.89	338.91	218.24	646.78	1010.03	417.74	657.7	755.63	822.68	851.77	422.73	443.12	568.15	459.59	390.66	11951	ENSMUSG00000006057	Atp5g1	ATP synthase/ H+ transporting/ mitochondrial F0 complex/ subunit C1 (subunit 9)
Snf8	486.41	356.33	424.72	335.04	274.63	300.19	278.75	263.67	217.87	374.43	533.55	457.51	496.35	424.34	189.57	344.57	420.68	291.37	499.54	265.61	259.21	298.89	296.88	290.11	182.88	246.36	435.33	364.12	420.57	273.75	381.14	329.97	341.65	324.71	312.64	367.98	365.19	226.48	27681	ENSMUSG00000006058	Snf8	SNF8/ ESCRT-II complex subunit/ homolog (S, cerevisiae)
Tbcb	2639.95	1940.11	2835.11	599.64	405.15	585.2	548.66	363.41	388.54	686.57	876.52	1027.52	938.14	935.38	456.24	288.54	778.61	558.99	1184.87	494.88	436.49	629.93	553.7	681.97	523.97	463.27	644.29	455.94	617.65	507.41	773.11	637.49	512.47	577.04	454.61	666.92	637.22	335.93	66411	ENSMUSG00000006095	Tbcb	tubulin folding cofactor B
Inpp5k	205.15	377.63	257.87	233.67	288.23	337.03	339.96	372.95	404.61	169.67	210.79	209.3	210.5	155.14	151.01	280.14	244.04	266.04	194.94	153.78	229.57	237.5	203.99	239.5	283.03	422.43	266.17	443.27	514.86	314.8	542.59	395.06	119.34	208.1	210.07	224.64	188.81	234.06	19062	ENSMUSG00000006127	Inpp5k	inositol polyphosphate 5-phosphatase K
Crkl	8.27	14.4	11.85	1.32	6.34	3.25	1.47	0.43	0	1.79	2.57	2.71	2.6	0	16.06	0	34.86	25.34	0	39.14	16.78	18.27	12.75	3.13	0.73	2.01	0	0	3.77	6.95	0	1.12	0	14.07	11.49	27.1	2.48	8.98	12929	ENSMUSG00000006134	Crkl	v-crk avian sarcoma virus CT10 oncogene homolog-like
Upk3bl	0	0	0	2.63	0	0	0	0	0	0	0	0	0	0	0	0	0	0	0	0	0	0	0	0	0	0	0	0	0	0	0	0	0	0	0	0	0	0	69665	ENSMUSG00000006143	Upk3bl	uroplakin 3B-like
Eps8l1	62.32	40.71	58.3	30.28	42.6	41.18	71.53	59.41	110.44	7.16	11.23	28.05	33.78	31.94	73.9	11.21	20.92	83.93	30.46	287.98	179.24	114.73	171.21	180.54	139.34	206.19	111.94	117.15	38.66	24.31	26.63	46.02	152.1	98.52	111.6	104.01	103.1	86.16	67425	ENSMUSG00000006154	Eps8l1	EPS8-like 1
Clint1	136.77	126.5	113.76	221.82	196.68	147.38	150.44	181.7	156.62	133.16	113.25	137.83	298.85	333.09	244.19	322.16	278.91	237.53	231.49	357.88	279.06	180.5	242.24	178.45	156.03	123.18	276.12	88.65	130.13	283.86	238.84	158.25	201.24	257.86	228.94	261.35	207.44	227.89	216705	ENSMUSG00000006169	Clint1	clathrin interactor 1
Prss16	0	0	0	7.24	0	29.26	0	0	0	0	0	0.6	0	0	0	0	0	0	0	0	0	0	0	0	0	0	0	0	0	0.32	0	0	0	0	1.64	0	0	0	54373	ENSMUSG00000006179	Prss16	protease/ serine 16 (thymus)
Cdkal1	33.64	14.4	10.9	11.19	9.97	8.67	7.37	2.6	7.03	19.69	11.23	5.43	119.54	0	9.64	0	16.27	0	9.14	25.16	18.73	23.39	7.29	19.31	28.3	24.77	2.49	0	0.94	15.47	16.64	14.59	7.02	15.08	16.41	23.6	13.66	19.65	68916	ENSMUSG00000006191	Cdkal1	CDK5 regulatory subunit associated protein 1-like 1
Htra1	12.68	3.13	0	121.77	139.58	197.23	2.95	7.37	0	0.36	0.32	2.41	10.39	0	0	0	2.32	22.17	0	0	0.56	0	0	0	0	0	0	0	0	3.16	22.47	0	0	2.51	0	0.87	0	2.53	56213	ENSMUSG00000006205	Htra1	HtrA serine peptidase 1
Zbtb17	65.07	110.22	54.04	73.72	48.04	98.62	124.63	65.05	48.19	49.04	54.22	78.41	18.19	146.01	77.11	28.01	37.19	22.17	63.96	167.76	113.25	120.58	94.71	118.97	63.86	81	42.29	3.17	134.84	49.57	70.74	47.14	49.14	108.57	77.14	61.19	91.92	24.7	22642	ENSMUSG00000006215	Zbtb17	zinc finger and BTB domain containing 17
Clcnkb	3.31	3.13	0.95	0	0	0	0	0	0	0	0	0	0	0	0	0	0	0	0	0	0	0	0	0	0	0	0	0	0	0	0	0	0	0	0	0	0	0	56365	ENSMUSG00000006216	Clcnkb	chloride channel/ voltage-sensitive Kb
Fam131c	0	0	0	0	0	0	0	0	0	0	0	0	0	0	0	0	0	0	0	0	0	0	0	0	0	0	0	0	0	0	0	0	0	0	0	0	0	0.28	277743	ENSMUSG00000006218	Fam131c	family with sequence similarity 131/ member C
Fblim1	538.25	372.62	418.56	402.83	521.16	468.16	345.12	420.65	558.22	294.24	220.09	340.5	101.35	196.2	498.01	633.11	643.81	598.58	417.29	304.76	103.18	198.77	187.6	132.53	125.55	117.83	134.33	291.29	165.02	158.82	190.57	211	159.12	282.99	273.26	207.16	240.98	283.73	74202	ENSMUSG00000006219	Fblim1	filamin binding LIM protein 1
Hspb7	0	0	0	0	0	0	0	0	0	0	0	0.3	0	0	0	0	0	0	0	0	0.56	0	0	0	0	0	29.85	0	20.75	2.21	0	0	14.04	23.12	36.93	25.35	19.87	34.8	29818	ENSMUSG00000006221	Hspb7	heat shock protein family/ member 7 (cardiovascular)
Epor	0	0.63	0	42.78	46.22	40.1	587.74	372.08	499.99	22.19	23.1	27.14	2.6	0	0	28.01	13.95	14.25	0	22.37	48.93	6.58	7.29	37.57	34.11	12.72	111.94	79.16	94.3	134.19	168.94	129.07	93.6	108.57	86.98	131.99	136.64	107.49	13857	ENSMUSG00000006235	Epor	erythropoietin receptor
Ccdc159	4.41	1.88	0	1.32	3.63	0	2.95	0	0	1.07	0.96	2.11	0	0	0	0	0	1.58	0	0	0	0	0	0	0	0	0	0	11.32	0.63	0	0	0	1.51	0.82	0	0	0	67119	ENSMUSG00000006241	Ccdc159	coiled-coil domain containing 159
Mob1b	83.27	62	96.7	53.32	87.92	61.77	47.93	53.34	79.32	48.68	49.41	46.14	36.38	0	19.28	19.61	16.27	23.75	54.83	44.74	25.45	29.23	34.61	27.65	53.7	49.54	139.31	34.83	52.81	30.94	22.47	38.16	32.76	25.13	60.72	36.71	40.99	43.22	68473	ENSMUSG00000006262	Mob1b	MOB kinase activator 1B
Vax1	0	0	0	0	0	0	0	0	0	0	0	0	0	0	0	0	0	0	0	5.59	0.56	5.85	7.29	1.04	0.73	0.67	0	0	0	0	0	0	0	0	0	0	0	0	22326	ENSMUSG00000006270	Vax1	ventral anterior homeobox 1
Atp6v1b2	169.31	121.49	161.64	449.57	337.17	417.23	362.08	364.28	367.46	1258.58	1151.8	1667.19	166.32	18.25	302.02	322.16	348.63	405.39	362.47	215.29	211.39	209.73	207.64	233.76	195.22	177.41	121.89	531.93	289.49	362.79	350.35	358.03	224.64	151.3	161.66	205.41	198.74	345.48	11966	ENSMUSG00000006273	Atp6v1b2	ATPase/ H+ transporting/ lysosomal V1 subunit B2
Eps15l1	119.67	87.67	117.56	122.43	82.48	109.45	223.44	178.24	157.63	130.66	119.67	141.14	283.26	31.94	57.83	159.68	132.48	53.84	207.12	195.72	167.49	181.23	202.17	156.01	221.34	179.42	87.07	259.63	229.14	170.82	173.93	191.92	257.4	165.87	151.81	155.59	86.95	204.31	13859	ENSMUSG00000006276	Eps15l1	epidermal growth factor receptor pathway substrate 15-like 1
Tep1	966.2	996.98	1034.31	903.74	1019.66	1000.26	1370.9	1213.82	1386.51	651.13	581.35	581.47	579.51	643.36	735.77	826.41	627.54	910.54	1017.35	531.23	568.47	407.05	491.77	424.21	446.32	418.41	815.94	690.24	1012.75	720.85	942.04	804.72	779.23	701.7	711.45	711.5	695.6	768.13	21745	ENSMUSG00000006281	Tep1	telomerase associated protein 1
Ttc5	7.72	10.65	9.01	7.9	11.78	16.26	18.44	19.51	5.02	9.31	9.3	7.84	10.39	0	19.28	14.01	60.43	12.67	0	30.76	35.23	16.81	47.36	19.31	10.16	10.71	57.21	3.17	4.71	24.31	22.47	11.22	2.34	13.57	18.87	9.61	9.94	8.7	219022	ENSMUSG00000006288	Ttc5	tetratricopeptide repeat domain 5
Osgep	340.26	203.53	246.02	94.13	211.18	205.9	174.77	241.55	238.95	146.05	166.83	134.81	202.7	164.26	375.92	201.7	264.96	297.71	310.69	100.65	192.94	187.81	174.85	189.93	451.4	282.51	189.06	462.27	346.07	504.25	371.16	391.7	318.24	192.01	212.53	272.71	195.02	185.51	66246	ENSMUSG00000006289	Osgep	O-sialoglycoprotein endopeptidase
Aamp	604.42	678.85	567.4	393.62	677.06	465.99	642.31	701.23	448.78	573.09	745.94	680.69	340.43	383.28	517.29	451.02	357.93	741.1	996.02	603.92	569.59	867.44	810.51	645.45	687.98	898.42	554.74	623.75	540.32	568.98	756.46	732.89	437.59	415.19	375.01	472	414.88	291.31	227290	ENSMUSG00000006299	Aamp	angio-associated migratory protein
Tmbim1	363.43	258.01	255.5	346.88	299.1	280.68	245.57	253.69	218.87	1325.16	1564.07	1909.37	194.9	182.51	983.17	599.5	578.73	519.4	761.49	86.67	129.19	152	120.21	182.1	127.73	121.17	410.46	332.46	358.33	421.52	350.35	401.8	280.8	264.9	271.61	333.02	350.28	424.34	69660	ENSMUSG00000006301	Tmbim1	transmembrane BAX inhibitor motif containing 1
Arpc2	1133.3	1160.43	1081.71	2080.64	2074.68	2199.92	2379.72	2366.5	2766.99	4798.08	3232.41	3952.65	2177.72	1583.3	3479.66	4120.83	4597.31	4388	3192.15	1962.75	2692.2	1753.88	1786.77	1838.25	1671.33	1610.05	3830.92	1437.47	2039.65	3043.18	2887.71	2839.52	2864.2	2782.16	2768.67	2777.81	2414.72	2858.11	76709	ENSMUSG00000006304	Arpc2	actin related protein 2/3 complex/ subunit 2
Kmt2b	54.05	131.51	67.78	81.62	59.82	60.69	179.2	84.13	67.27	92	77	104.95	57.17	182.51	115.67	84.04	60.43	52.26	109.65	204.1	190.7	155.66	178.5	119.49	95.07	103.1	223.88	117.15	144.27	85.25	115.67	129.07	121.68	96.51	123.91	110.13	79.5	94.86	75410	ENSMUSG00000006307	Kmt2b	lysine (K)-specific methyltransferase 2B
Zbtb32	20.4	18.79	5.21	1.32	1.81	0	0	2.17	0	34.36	51.33	52.18	0	0	12.85	19.61	6.97	19	0	5.59	0	0	0	0.52	0	0	0	0	0	0	0	0	2.34	5.53	3.28	1.75	1.24	0	58206	ENSMUSG00000006310	Zbtb32	zinc finger and BTB domain containing 32
Etv2	0	0	0	0.66	0	0	0.74	0	0	0	0	0	0	0	0	0	0	0	0	0	0	0	0	0	0	0	0	0	0	0	0	0	0	0	1.64	0.87	0	0	14008	ENSMUSG00000006311	Etv2	ets variant 2
Upk1a	8.82	7.51	6.64	7.24	1.81	0	4.42	1.3	3.01	5.01	1.93	1.81	0	0	89.96	0	2.32	0	0	0	2.24	0	1.82	1.04	0	0	29.85	0	0	1.58	13.32	0	4.68	0.5	2.46	0	0	6.45	109637	ENSMUSG00000006313	Upk1a	uroplakin 1A
Tmem147	659.57	432.11	501.99	199.44	296.38	319.69	248.52	269.74	232.93	207.97	297.09	218.35	509.35	903.44	536.57	288.54	457.87	228.03	566.55	215.29	151.28	213.39	264.1	261.94	276.5	331.38	766.18	753.56	415.85	524.14	535.93	503.93	191.88	206.59	215.81	300.68	260.85	226.76	69804	ENSMUSG00000006315	Tmem147	transmembrane protein 147
Rps9	8027.38	5617.43	5279.16	3400.38	3701.61	4785.63	2269.1	2426.78	2702.73	2018.89	2569.89	2618.41	12946.8	15919.7	17077	16248	13194.6	10880.5	16700.9	2742.82	1747.92	2261.77	1957.98	1610.75	1509.5	1727.21	9323.55	11569.4	8286.83	5900.39	8173.79	7860.87	8126.95	6942.58	8121.37	6595.76	6262.88	4594.19	76846	ENSMUSG00000006333	Rps9	ribosomal protein S9
Tfpt	29.23	33.19	20.86	35.54	17.22	8.67	21.39	24.29	15.06	30.78	46.52	25.33	176.71	36.5	102.82	140.07	41.84	53.84	51.78	89.47	34.67	49.69	32.78	45.92	14.51	61.59	109.45	110.82	114.1	104.51	89.88	130.19	30.42	51.77	78.78	62.93	72.04	69.88	69714	ENSMUSG00000006335	Tfpt	TCF3 (E2A) fusion partner
Susd2	87.69	36.95	14.22	1.32	3.63	1.08	4.42	0	0	1.07	0.64	1.81	0	0	0	0	0	0	3.05	0	0.56	0	0	1.57	0	0	0	53.83	3.77	0	3.33	5.61	0	4.52	2.46	0	0	0	71733	ENSMUSG00000006342	Susd2	sushi domain containing 2
Ggt5	46.88	60.12	53.09	134.94	143.21	171.23	227.13	180.84	113.45	23.98	28.88	36.79	210.5	95.82	93.18	184.89	123.18	114.02	100.52	243.25	247.19	336.16	358.81	224.37	215.54	298.58	42.29	288.13	296.09	176.82	317.9	222.22	121.68	140.74	100.11	139.85	155.27	101.87	23887	ENSMUSG00000006344	Ggt5	gamma-glutamyltransferase 5
Ggt1	0	0	0.95	2.63	0	4.33	0	0	0	2.15	0.64	1.81	0	0	0	0	0	0	0	0	0	0	0	0	0	0	0	0	0	0	0	0	4.68	9.05	9.03	0	0	0	14598	ENSMUSG00000006345	Ggt1	gamma-glutamyltransferase 1
Crip2	194.12	173.47	104.28	21.72	21.75	1.08	2123.09	1726.85	1287.11	43.67	23.74	28.65	797.8	255.52	22.49	84.04	155.72	71.26	167.53	0	0	0	0	6.26	0	0	62.19	243.8	77.32	62.2	133.15	129.07	156.78	81.43	85.34	83.91	157.75	44.62	68337	ENSMUSG00000006356	Crip2	cysteine rich protein 2
Crip1	454.42	475.95	423.3	2520.34	878.27	807.36	1817.05	1392.49	799.17	1011.23	1605.14	653.25	26137.8	19629.3	2653.92	6387.15	6277.72	5661.16	20331.7	148.18	33	23.39	81.96	45.4	26.13	24.1	18560	14039.1	14829.2	7065.5	14493.5	13098.8	12582.4	10866.8	10209.8	17271.7	17980	5795.08	12925	ENSMUSG00000006360	Crip1	cysteine-rich protein 1 (intestinal)
Cbfa2t3	94.3	169.71	137.47	234.99	135.05	243.83	16.22	27.75	1	56.2	45.88	36.19	1039.49	2135.4	247.4	263.33	502.03	188.44	319.82	740.92	726.18	330.31	613.8	427.86	149.5	125.19	726.38	633.25	337.58	463.52	657.43	650.96	325.27	540.85	584.26	682.65	397.49	227.6	12398	ENSMUSG00000006362	Cbfa2t3	CBFA2/RUNX1 translocation partner 3
Fbln1	3.31	0	0	15.14	29	6.5	0	0	0	1.43	0	0	0	0	0	0	0	0	0	11.18	4.75	3.65	1.82	3.65	0	2.68	0	0	0	0.63	0	2.24	30.42	23.12	9.03	16.61	14.91	33.68	14114	ENSMUSG00000006369	Fbln1	fibulin 1
Pgrmc1	99.82	103.96	71.1	50.02	29	52.02	30.97	60.28	96.38	74.81	72.19	71.18	114.34	82.13	64.26	14.01	67.4	60.17	9.14	44.74	34.39	56.27	72.86	49.57	109.58	74.31	2.49	6.33	39.6	97.88	79.06	60.61	79.56	50.77	48.41	67.3	74.53	97.95	53328	ENSMUSG00000006373	Pgrmc1	progesterone receptor membrane component 1
Gcat	75.55	75.78	36.97	43.44	38.97	46.6	4.42	6.07	3.01	15.75	13.8	6.94	132.53	27.38	3.21	8.4	60.43	12.67	0	8.39	11.74	9.5	32.78	10.96	7.98	18.74	44.78	3.17	33	28.42	40.78	60.61	7.02	40.71	48.41	39.33	34.78	21.89	26912	ENSMUSG00000006378	Gcat	glycine C-acetyltransferase (2-amino-3-ketobutyrate-coenzyme A ligase)
Tek	0	0	0	1.32	3.63	0	0	0	0	0	0	0	0	0	0	0	0	0	0	0	0	0	0	0	0	0	0	0	0	0	1.66	0	0	0.5	4.92	0	2.48	3.37	21687	ENSMUSG00000006386	Tek	TEK receptor tyrosine kinase
Mpl	0	0	0	0	0	0	0	0	0	0.36	0	0	0	0	0	0	0	0	0	0	0	0	0	0	0	0	0	0	0	0	0	0	0	0	0	0	0	0	17480	ENSMUSG00000006389	Mpl	myeloproliferative leukemia virus oncogene
Elovl1	662.33	723.31	541.8	497.62	517.54	537.52	752.19	495.68	472.88	704.82	940.69	741.91	535.33	469.97	517.29	308.15	441.6	451.31	1044.76	704.58	584.13	898.13	1012.69	828.59	812.81	790.63	455.23	490.77	550.7	640.97	687.39	746.36	636.49	613.73	489.89	627.58	719.2	360.35	54325	ENSMUSG00000006390	Elovl1	elongation of very long chain fatty acids (FEN1/Elo2/ SUR4/Elo3/ yeast)-like 1
Med8	140.08	119.61	191.03	187.59	204.84	239.5	224.92	226.81	428.7	264.53	239.66	270.53	176.71	77.57	141.37	112.06	181.29	153.6	73.1	139.8	188.19	192.2	132.96	238.98	422.37	245.02	87.07	310.29	132.96	172.08	188.91	168.35	126.36	152.3	164.94	192.3	217.37	166.14	80509	ENSMUSG00000006392	Med8	mediator complex subunit 8
Hyi	103.68	272.42	181.55	104	44.41	30.34	307.51	170	109.43	72.31	80.21	46.14	168.92	63.88	337.36	394.99	253.34	294.54	292.41	254.43	153.51	225.08	169.39	146.62	47.9	112.47	328.36	155.15	173.51	164.82	278.78	134.68	95.94	154.82	218.28	170.44	156.51	73.25	68180	ENSMUSG00000006395	Hyi	hydroxypyruvate isomerase (putative)
Cdc20	20.96	19.41	21.8	28.3	30.82	9.75	6.64	3.9	11.04	14.32	21.18	11.16	10.39	36.5	32.13	0	13.95	17.42	0	5.59	6.15	7.31	3.64	3.65	0.73	1.34	0	0	9.43	10.74	3.33	19.08	9.36	16.08	27.08	30.59	34.78	21.33	107995	ENSMUSG00000006398	Cdc20	cell division cycle 20
Adamts4	0.55	0	0	0.66	3.63	0	0	0	0	0.72	0	0	0	0	0	0	0	0	0	0	1.12	0	0	1.57	0	0	0	0	11.32	1.89	0	7.86	0	0	0	0	0	0.84	240913	ENSMUSG00000006403	Adamts4	a disintegrin-like and metallopeptidase (reprolysin type) with thrombospondin type 1 motif/ 4
Nectin4	14.89	5.64	8.06	23.7	29.91	37.93	62.68	46.4	49.2	7.52	6.1	8.44	0	0	6.43	11.21	53.46	1.58	3.05	321.53	243.27	129.35	203.99	103.31	33.38	41.51	111.94	0	53.75	19.89	28.29	29.18	11.7	55.79	54.16	29.72	67.08	35.36	71740	ENSMUSG00000006411	Nectin4	nectin cell adhesion molecule 4
Pfdn2	213.42	78.91	158.32	152.71	123.27	106.2	117.25	103.65	122.49	174.68	218.17	213.22	296.25	182.51	481.95	182.09	467.17	218.53	258.91	81.08	93.67	137.39	96.53	104.88	142.97	100.42	370.65	718.74	309.29	221.97	238.01	204.27	198.9	94	122.27	99.64	104.34	101.03	18637	ENSMUSG00000006412	Pfdn2	prefoldin 2
Rnf114	738.99	879.88	892.58	422.58	515.72	721.75	547.92	580.68	774.07	301.76	338.48	294.05	280.66	278.33	308.45	442.62	304.47	354.71	755.4	380.25	483.19	437.01	615.63	624.05	902.07	761.85	124.38	373.62	568.61	401.63	420.26	543.21	748.81	445.35	391.42	381.97	372.64	253.7	81018	ENSMUSG00000006418	Rnf114	ring finger protein 114
C330007P06Rik	8.27	10.65	15.17	7.9	0.91	8.67	4.42	8.24	5.02	11.81	9.63	4.52	57.17	36.5	22.49	28.01	0	3.17	27.41	16.78	8.11	15.35	1.82	7.3	15.97	10.71	17.41	0	0.94	12.31	4.16	3.37	2.34	10.56	14.77	13.99	12.42	20.49	77644	ENSMUSG00000006423	C330007P06Rik	RIKEN cDNA C330007P06 gene
Neurl1a	0.55	4.38	0	48.05	61.63	34.68	19.91	7.81	20.08	0	3.21	0	0	0	147.8	11.21	46.48	63.34	121.84	341.1	479.83	342.74	344.24	268.2	298.27	315.99	0	28.5	16.03	13.89	34.12	0	74.88	112.09	192.84	106.64	105.58	74.37	18011	ENSMUSG00000006435	Neurl1a	neuralized E3 ubiquitin protein ligase 1A
Srm	178.13	171.59	156.9	186.28	191.24	153.89	272.12	201.65	161.64	344.71	404.25	414.99	236.48	273.77	131.73	64.43	146.43	258.12	88.33	388.64	404.05	525.43	537.31	691.89	549.37	368.87	353.24	208.97	159.36	148.09	279.62	153.76	147.42	169.39	126.37	248.24	181.35	114.22	20810	ENSMUSG00000006442	Srm	spermidine synthase
Epha2	141.73	50.1	92.91	19.09	14.5	17.34	0	0	0	2.86	0	0.3	67.57	187.08	221.7	92.45	62.75	104.51	48.74	109.04	114.37	124.96	234.96	68.35	52.98	100.42	0	0	0	5.05	8.32	2.24	102.96	33.68	23.8	28.84	13.66	16.84	13836	ENSMUSG00000006445	Epha2	Eph receptor A2
Rbm14	140.08	202.28	221.84	149.42	128.7	80.19	114.3	151.78	126.5	107.39	150.47	168.29	72.76	22.81	32.13	78.44	220.8	125.1	124.88	81.08	106.54	127.16	105.64	93.92	154.58	174.73	2.49	151.98	87.7	92.51	96.53	63.97	105.3	57.3	59.08	50.7	89.43	87	56275	ENSMUSG00000006456	Rbm14	RNA binding motif protein 14
Actn3	0	0	0	0	0	0	0.74	0	0	0	0	0	0	0	0	0	0	0	0	0	0	2.92	7.29	0	0	1.34	0	0	5.66	0	0	0	0	1.01	0	0	0	0.56	11474	ENSMUSG00000006457	Actn3	actinin alpha 3
A530013C23Rik	0	1.25	0	0	8.16	2.17	3.69	2.17	0	10.38	11.87	10.25	0	0	0	11.21	0	0	0	0	0.84	0	0	3.65	4.35	0	0	0	17.92	2.84	0	0	4.68	7.04	0.82	0.87	1.24	0.28	329562	ENSMUSG00000006462	A530013C23Rik	RIKEN cDNA A530013C23 gene
Zdhhc24	6.07	23.8	56.88	18.43	48.04	30.34	34.66	97.14	35.14	28.64	26.63	25.64	25.99	0	6.43	19.61	4.65	4.75	0	8.39	30.76	39.46	43.71	29.74	76.93	79.67	2.49	25.33	15.09	17.37	24.97	15.71	14.04	6.53	9.85	20.1	11.18	5.33	70605	ENSMUSG00000006463	Zdhhc24	zinc finger/ DHHC domain containing 24
Bbs1	2.76	3.13	3.32	2.63	8.16	11.92	0	0.43	0	2.15	2.57	1.81	0	0	0	0	0	0	0	2.8	9.51	5.12	12.75	5.22	15.97	14.73	0	0	13.2	0.63	5.83	0	0	3.52	1.64	0	4.97	5.33	52028	ENSMUSG00000006464	Bbs1	Bardet-Biedl syndrome 1 (human)
Ndor1	92.65	171.59	79.16	105.97	81.57	86.7	233.77	181.27	120.48	72.31	106.84	70.27	124.74	200.76	115.67	86.84	90.64	30.09	60.92	254.43	169.73	190.73	222.21	221.76	135.71	186.11	32.34	3.17	154.65	78.94	138.14	132.44	145.08	119.63	141.96	139.85	115.52	74.65	78797	ENSMUSG00000006471	Ndor1	NADPH dependent diflavin oxidoreductase 1
Nsmf	236.59	324.4	281.09	102.02	96.08	86.7	117.99	105.38	28.11	90.21	120.63	92.59	223.49	273.77	83.54	39.22	120.86	148.85	185.8	246.04	157.15	172.46	209.46	178.97	113.94	159.33	425.38	620.58	496.95	343.85	383.64	540.97	121.68	189.5	199.4	148.59	296.87	101.03	56876	ENSMUSG00000006476	Nsmf	NMDA receptor synaptonuclear signaling and neuronal migration factor
Prl7a1	0	0	0	0	0	0	0	0	0	0	0	0	0	0	0	0	0	0	0	0	0	0	0	0	0	0	0	0	0	0	0	0	0	0.5	0	0	0	0	19113	ENSMUSG00000006488	Prl7a1	prolactin family 7/ subfamily a/ member 1
Pdk1	61.21	51.98	65.89	52.66	29.91	72.61	103.98	91.94	118.47	70.52	48.45	57.91	46.78	173.39	16.06	67.23	0	34.84	39.6	402.62	314.85	303.27	331.49	217.06	354.88	263.77	34.83	0	33.95	22.73	26.63	14.59	44.46	56.3	63.19	60.31	47.2	41.26	228026	ENSMUSG00000006494	Pdk1	pyruvate dehydrogenase kinase/ isoenzyme 1
Ptbp1	297.8	315.63	374	426.53	360.73	329.45	346.6	355.17	238.95	568.44	718.67	785.04	254.67	374.15	571.91	501.45	622.89	528.9	319.82	248.84	458.3	393.16	429.85	432.04	402.77	524.86	258.71	326.12	614.82	430.36	363.67	576.88	234	172.41	164.12	155.59	140.36	387.29	19205	ENSMUSG00000006498	Ptbp1	polypyrimidine tract binding protein 1
Mvd	58.46	108.34	61.15	84.91	85.2	41.18	68.58	26.45	16.06	168.24	347.14	348.34	137.73	136.88	16.06	19.61	18.59	41.17	130.98	53.12	30.48	40.19	36.43	38.61	17.42	18.08	42.29	101.32	81.1	44.52	63.25	52.75	14.04	49.76	46.77	47.2	29.81	31.71	192156	ENSMUSG00000006517	Mvd	mevalonate (diphospho) decarboxylase
Cyba	936.42	1099.06	1057.54	2854.72	3163.22	2548.87	4235.86	4070.8	3277.02	3680.53	4577.99	4430.97	5621.02	5288.32	10628.5	7457.28	7263.19	8296.18	18461.5	3276.84	2052.42	3192.06	3418.73	2268.72	2209.09	2025.79	8895.68	9976.82	4960.97	5335.51	6911.36	7610.59	5822.01	3028.46	3499.81	3998.01	3879.21	2895.15	13057	ENSMUSG00000006519	Cyba	cytochrome b-245/ alpha polypeptide
Itih3	0	0	2.37	0	0	6.5	0	0.43	0	0	0	0	0	0	0	0	0	0	0	0	0	0	0	0	0	0	0	0	0	0	0	0	0	0	0	0	0	0	16426	ENSMUSG00000006522	Itih3	inter-alpha trypsin inhibitor/ heavy chain 3
Stimate	46.32	44.46	46.93	52	76.13	85.61	47.2	66.35	72.29	44.03	45.24	60.32	10.39	9.13	6.43	84.04	27.89	60.17	21.32	237.65	190.7	161.5	183.96	142.45	132.08	133.22	34.83	82.32	59.41	30.31	44.94	48.26	21.06	56.8	43.49	26.22	32.3	29.75	69179	ENSMUSG00000006526	Stimate	STIM activating enhancer
Sfmbt1	54.6	75.15	20.86	40.81	46.22	33.59	59.73	29.92	54.22	39.73	25.03	25.03	0	109.51	25.7	106.45	118.54	39.59	3.05	123.02	127.51	57.73	83.78	76.7	58.78	83.68	29.85	37.99	38.66	30.63	24.13	58.36	39.78	72.88	58.26	49.82	45.96	58.94	54650	ENSMUSG00000006527	Sfmbt1	Scm-like with four mbt domains 1
Itih1	0	0	0	0	0	0	0	0	0	0	0	1.21	0	0	0	0	0	0	0	0	0	0	0	1.04	0	0	0	0	0	0	0	0	0	0	0	0	0	0	16424	ENSMUSG00000006529	Itih1	inter-alpha trypsin inhibitor/ heavy chain 1
Ihh	0	0	0	25.01	1.81	17.34	0	0.43	0	2.86	0	0.9	0	0	0	0	0	0	0	0	0	0	3.64	0	0	0	0	0	6.6	0	0	0	0	0	0	0	1.24	0	16147	ENSMUSG00000006538	Ihh	Indian hedgehog
Prkag3	0	0	0	0	0	0	0	0	0	0	0	0	0	0	0	0	0	0	0	0	0	0	0	0	0	0	0	0	0	0	0	0	0	0	1.64	0	0	0	241113	ENSMUSG00000006542	Prkag3	protein kinase/ AMP-activated/ gamma 3 non-catalytic subunit
Cryba2	0	2.5	0	2.63	0	0	0	0	0	0	0	0	0	0	0	0	0	0	0	0	0	0	0	0	0	0	0	0	0	0	0	0	0	0	0	1.75	0	0	12958	ENSMUSG00000006546	Cryba2	crystallin/ beta A2
Atp7b	0	0	0	0	0	0	0.74	0.43	5.02	0	0	0.6	0	0	0	0	0	0	0	2.8	0.84	0.73	0	0	0	4.69	0	0	2.83	0	0	0	0	0	0	0	0	0	11979	ENSMUSG00000006567	Atp7b	ATPase/ Cu++ transporting/ beta polypeptide
Slc4a1	0.55	0.63	6.16	3.95	0.91	0	225.66	248.49	155.62	1.79	0.96	1.51	0	0	0	0	16.27	0	0	0	0	8.04	1.82	0	5.08	9.37	0	0	0	0.32	0	0	0	0	0	0	0	0	20533	ENSMUSG00000006574	Slc4a1	solute carrier family 4 (anion exchanger)/ member 1
Rundc3a	0	0	0	8.56	7.25	0	16.22	6.5	4.02	0	0.64	1.81	0	0	0	0	0	1.58	0	5.59	16.5	35.81	18.21	16.18	10.16	10.04	0	0	0	0.95	0	0	0	2.01	2.46	0	3.73	0.28	51799	ENSMUSG00000006575	Rundc3a	RUN domain containing 3A
Slc4a3	11.58	6.89	0	15.14	7.25	11.92	0.74	0	0	0	0.32	1.81	0	0	0	0	65.08	17.42	15.23	5.59	1.12	8.04	12.75	3.65	1.45	6.69	0	0	0	0.95	4.16	11.22	0	6.53	7.39	21.85	11.18	3.65	20536	ENSMUSG00000006576	Slc4a3	solute carrier family 4 (anion exchanger)/ member 3
Cdt1	140.63	110.85	79.64	52.66	104.23	63.94	49.41	54.64	68.27	73.74	103.95	95.3	31.18	146.01	109.24	42.02	69.73	118.77	130.98	22.37	24.33	38	23.68	30.79	49.35	47.53	9.95	0	28.29	77.67	37.45	54.99	86.58	50.77	56.62	52.44	40.99	67.07	67177	ENSMUSG00000006585	Cdt1	chromatin licensing and DNA replication factor 1
Runx1t1	0	0	0	0.66	2.72	0	0	0	0	0	0	0	0	0	0	0	0	0	0	2.8	0.84	3.65	5.46	0	0.73	0	0	0	0	0.32	0	0	0	0.5	0.82	0	0	0	12395	ENSMUSG00000006586	Runx1t1	RUNX1 translocation partner 1
Snai3	0	0	0	1.97	0	0	0	0	0	4.3	5.13	11.46	0	0	0	0	0	0	0	0	0	0	0	0	0	0	0	0	0	0	0	0	0	0	0	0	0	0	30927	ENSMUSG00000006587	Snai3	snail family zinc finger 3
Aprt	840.46	839.17	769.33	942.58	579.17	722.83	319.31	173.03	178.71	2569.43	2673.84	3304.83	1172.02	1341.47	1349.45	1358.67	1104	1327.01	1699.64	285.19	324.36	409.24	322.38	361.08	174.17	245.02	604.49	259.63	338.53	526.35	574.21	454.55	407.17	483.05	415.22	410.81	329.17	256.79	11821	ENSMUSG00000006589	Aprt	adenine phosphoribosyl transferase
Gtf2h1	73.9	64.5	90.54	53.97	79.76	113.79	93.65	140.07	174.69	129.22	116.46	150.19	38.98	114.07	83.54	81.24	132.48	34.84	48.74	114.63	76.34	67.96	74.68	60.01	93.62	51.55	47.26	22.16	117.87	55.26	35.78	78.56	65.52	85.95	96.83	101.39	78.25	63.15	14884	ENSMUSG00000006599	Gtf2h1	general transcription factor II H/ polypeptide 1
Hfe	324.27	262.4	245.07	557.52	750.47	522.35	1679.89	2133.19	1909.58	120.99	128.33	89.87	509.35	579.48	571.91	322.16	257.99	430.72	289.37	357.88	475.64	496.2	606.52	542.66	833.85	868.29	442.79	642.75	306.47	676.33	612.49	921.44	919.63	707.23	801.72	661.67	710.51	928.38	15216	ENSMUSG00000006611	Hfe	homeostatic iron regulator
Abhd1	13.79	2.5	4.27	11.19	12.69	16.26	30.97	19.51	21.08	0.72	0.32	0.3	0	45.63	0	0	2.32	33.25	0	13.98	19.01	38	25.5	36	32.66	31.46	0	6.33	21.69	6.95	2.5	10.1	0	11.06	6.56	6.12	6.21	4.21	57742	ENSMUSG00000006638	Abhd1	abhydrolase domain containing 1
Slc5a6	13.24	2.5	5.21	34.23	18.13	19.51	23.6	15.61	30.12	46.89	39.46	38.6	0	0	0	0	2.32	12.67	67.01	27.96	16.22	25.58	21.86	30.26	43.54	31.46	0	28.5	16.97	24.94	42.44	33.67	21.06	8.04	19.69	29.72	6.21	21.05	330064	ENSMUSG00000006641	Slc5a6	solute carrier family 5 (sodium-dependent vitamin transporter)/ member 6
Tcf23	0	0	0	1.97	0	0	0	0	0	0	0	0	0	0	0	0	0	0	0	0	0	0	0	0	0	0	0	0	0	0	0	0	0	0	0	0	0	0	69852	ENSMUSG00000006642	Tcf23	transcription factor 23
Aplp1	46.88	56.36	35.08	29.62	23.57	32.51	0.74	0	1	35.8	36.58	38.3	25.99	0	106.03	2.8	13.95	0	45.69	2.8	8.39	8.04	10.93	12	15.24	10.04	9.95	0	14.14	9.47	31.62	21.32	23.4	24.63	9.03	21.85	33.54	17.4	11803	ENSMUSG00000006651	Aplp1	amyloid beta (A4) precursor-like protein 1
Qrich1	52.94	33.19	55.93	67.8	72.51	45.52	78.17	71.55	87.35	102.38	76.68	86.86	12.99	0	57.83	50.42	4.65	31.67	0	44.74	48.93	67.23	102	67.83	46.45	68.95	14.93	88.65	16.03	50.52	41.61	41.53	32.76	31.67	45.95	22.73	31.05	96.82	69232	ENSMUSG00000006673	Qrich1	glutamine-rich 1
P4htm	1.65	3.13	0	0	0.91	0	4.42	3.04	0	0.36	0	1.51	23.39	0	0	0	0	0	0	0	1.68	1.46	0	1.57	0	0	0	19	0	0	0	0	0	2.01	0	4.37	2.48	0	74443	ENSMUSG00000006675	P4htm	prolyl 4-hydroxylase/ transmembrane (endoplasmic reticulum)
Usp19	395.96	305.61	342.24	303.44	443.21	231.91	317.84	493.51	522.07	261.67	312.17	312.75	223.49	86.69	215.27	179.29	146.43	144.1	292.41	436.17	317.93	312.77	340.6	314.11	519.61	514.15	114.43	104.49	261.2	243.44	141.47	227.84	292.5	172.91	196.12	215.9	180.11	204.31	71472	ENSMUSG00000006676	Usp19	ubiquitin specific peptidase 19
Pola1	20.96	16.28	11.85	25.67	0	15.17	22.12	17.78	8.03	15.39	12.83	12.97	0	0	44.98	2.8	65.08	0	0	16.78	8.39	5.12	10.93	4.17	3.63	4.02	24.88	0	5.66	11.05	14.15	14.59	23.4	44.23	50.88	46.33	54.65	42.66	18968	ENSMUSG00000006678	Pola1	polymerase (DNA directed)/ alpha 1
Cdc42	3887.4	2695.99	3274.06	3141.04	2962.92	3525.29	2253.62	2072.48	2388.49	5270.59	4462.49	3792.81	3269.18	2222.1	2049.88	2417.59	3051.7	2007.93	1845.84	1739.07	1708.77	2521.2	2070.91	2398.12	2873.85	2829.14	1467.69	503.43	1222.09	2011.32	1148.43	1469.14	3547.49	2873.14	2680.86	2836.37	2905.37	5474.86	12540	ENSMUSG00000006699	Cdc42	cell division cycle 42
Pknox1	186.4	138.4	195.3	155.34	146.83	156.05	268.43	251.52	326.3	164.3	161.06	161.65	83.16	4.56	212.06	201.7	176.64	145.69	152.3	668.23	896.47	644.55	530.02	640.75	525.42	537.58	121.89	44.33	131.07	108.3	163.94	106.62	201.24	221.17	201.04	157.33	178.87	129.38	18771	ENSMUSG00000006705	Pknox1	Pbx/knotted 1 homeobox
D130043K22Rik	0	0	0	0	0	0	0	0	0	0	0	0	0	0	0	0	0	0	0	0	0	0	0	0	0	0	0	0	0	0	0	0	0	0	0	0.87	0	0	210108	ENSMUSG00000006711	D130043K22Rik	RIKEN cDNA D130043K22 gene
Gmnn	53.49	34.44	28.44	43.44	46.22	75.86	56.05	56.38	85.34	130.3	137.96	84.45	75.36	118.63	19.28	61.63	92.97	25.34	27.41	2.8	10.63	16.08	18.21	17.22	10.16	17.41	0	60.16	36.78	26.21	41.61	29.18	49.14	44.23	32.82	59.44	31.05	56.13	57441	ENSMUSG00000006715	Gmnn	geminin
Acot13	90.99	88.3	106.18	124.4	213	163.64	154.86	179.1	157.63	192.58	180.95	141.45	254.67	177.95	128.52	100.85	218.48	288.2	405.11	153.78	124.15	151.27	120.21	141.93	178.53	170.04	174.13	186.81	232.91	335.32	277.95	270.48	276.12	192.51	160.01	192.3	135.39	242.48	66834	ENSMUSG00000006717	Acot13	acyl-CoA thioesterase 13
Zfp184	0	0	0	0	9.97	0	1.47	0	22.09	0	1.28	0	0	0	0	0	0	0	0	16.78	3.08	10.23	1.82	3.65	16.69	1.34	0	0	0	0	0	0	0	0	0	0	0	0.28	193452	ENSMUSG00000006720	Zfp184	zinc finger protein 184 (Kruppel-like)
Cyp27b1	0.55	0	0	0.66	0	0	0	0	0	0	0	0.3	0	0	0	0	0	0	0	0	0.84	0.73	0	1.04	0	0	0	0	0	0.32	0	0	0	0	0	0	0	0	13115	ENSMUSG00000006724	Cyp27b1	cytochrome P450/ family 27/ subfamily b/ polypeptide 1
Cdk4	197.98	120.24	168.28	331.74	449.56	348.95	339.22	366.01	303.2	265.96	271.11	290.13	379.41	182.51	369.49	193.3	327.72	403.8	429.48	209.7	216.99	279.89	367.92	316.2	484.78	395.65	246.27	389.45	386.62	494.78	340.37	374.86	439.93	207.09	274.9	286.7	222.34	324.99	12567	ENSMUSG00000006728	Cdk4	cyclin-dependent kinase 4
B4galnt1	19.85	91.43	41.24	549.62	300.91	264.42	294.24	181.7	45.18	879.15	1393.06	752.77	444.38	214.45	793.61	635.91	492.73	547.91	874.19	422.19	221.74	258.7	216.74	220.19	57.33	131.88	116.92	19	100.9	81.46	158.12	67.34	119.34	443.34	429.99	159.08	207.44	69.32	14421	ENSMUSG00000006731	B4galnt1	beta-1/4-N-acetyl-galactosaminyl transferase 1
Mettl1	90.99	50.1	36.5	103.34	48.94	69.36	151.18	120.12	95.38	142.83	124.48	104.65	267.67	264.64	16.06	263.33	137.13	95.01	103.56	156.57	230.97	154.93	116.57	154.97	85.63	78.33	94.53	117.15	82.04	28.73	100.7	67.34	9.36	96.01	100.11	99.64	95.64	83.91	17299	ENSMUSG00000006732	Mettl1	methyltransferase like 1
Tspan31	94.3	73.9	113.76	263.29	281.88	352.2	255.15	179.97	279.11	264.53	317.95	276.26	215.69	346.77	263.46	162.48	132.48	186.86	152.3	234.86	383.36	466.24	393.42	467.52	323.67	437.16	310.95	452.77	341.36	365	196.4	193.04	442.27	210.61	256.02	233.38	280.72	354.18	67125	ENSMUSG00000006736	Tspan31	tetraspanin 31
Kif5b	363.98	373.24	369.74	318.58	532.04	300.19	343.65	477.46	317.26	363.69	346.82	332.35	784.81	698.11	80.32	551.87	546.19	405.39	197.99	332.72	313.46	186.35	156.64	146.1	140.06	186.78	330.85	215.3	320.61	339.43	392.79	410.78	248.04	485.56	439.84	491.23	386.31	354.18	16573	ENSMUSG00000006740	Kif5b	kinesin family member 5B
Saal1	49.63	77.03	36.97	33.57	24.47	33.59	13.27	6.5	15.06	31.14	22.46	27.44	23.39	18.25	0	25.21	25.57	17.42	45.69	13.98	36.07	44.58	52.82	68.88	52.25	52.89	0	28.5	47.15	52.1	46.6	12.35	42.12	26.64	25.44	18.36	34.78	40.13	78935	ENSMUSG00000006763	Saal1	serum amyloid A-like 1
Krt23	47.98	5.01	25.12	5.27	0	4.33	0	0	0	0	0	0	10.39	0	0	0	0	0	0	0	0	0	0	0	0	0	0	0	0	0.95	0	0	0	0	0	0	0	0.28	94179	ENSMUSG00000006777	Krt23	keratin 23
Cnp	191.36	147.17	155.48	254.07	155.9	285.01	225.66	165.66	153.61	136.74	142.77	126.06	725.04	433.47	372.71	257.73	181.29	349.96	277.18	131.41	182.87	223.62	289.6	246.8	275.77	298.58	514.93	949.87	433.77	455.31	436.9	611.68	428.23	251.83	225.66	200.16	245.94	244.72	12799	ENSMUSG00000006782	Cnp	2'/3'-cyclic nucleotide 3' phosphodiesterase
Ttc25	4.41	1.25	3.32	2.63	5.44	0	2.21	0.43	0	2.15	1.6	0.6	10.39	41.07	0	0	4.65	0	3.05	25.16	16.22	3.65	5.46	6.78	15.97	9.37	0	0	13.2	5.05	53.26	2.24	0	8.04	0	4.37	12.42	6.45	74407	ENSMUSG00000006784	Ttc25	tetratricopeptide repeat domain 25
Sulf2	31.43	41.33	42.66	397.57	603.64	707.66	57.52	81.1	124.49	1106.81	806.58	964.19	197.5	369.59	266.68	302.55	281.23	319.88	374.65	67.1	66.27	21.19	20.04	42.79	42.82	43.51	430.36	734.57	677.05	957.03	707.36	716.05	346.33	242.28	150.99	446.65	321.71	477.94	72043	ENSMUSG00000006800	Sulf2	sulfatase 2
Sod2	406.44	173.47	333.24	377.16	532.94	395.55	213.12	208.16	226.9	441.01	588.73	779.91	306.65	241.83	372.71	252.12	251.02	193.19	213.22	58.71	62.08	89.16	100.18	116.88	149.5	100.42	4.98	183.64	278.18	333.75	102.36	148.15	306.54	209.1	175.61	279.7	229.8	248.09	20656	ENSMUSG00000006818	Sod2	superoxide dismutase 2/ mitochondrial
Tmco6	3.31	5.01	5.69	5.92	9.06	32.51	16.22	19.95	17.07	7.52	2.57	3.32	20.79	0	112.45	0	120.86	53.84	27.41	72.69	87.24	42.39	34.61	15.65	19.59	15.4	24.88	9.5	26.4	18.94	18.31	0	18.72	27.65	39.39	6.99	19.87	16.84	71983	ENSMUSG00000006850	Tmco6	transmembrane and coiled-coil domains 6
Stambp	66.73	66.38	105.71	60.56	49.85	62.85	70.06	101.91	58.23	86.98	74.75	60.62	64.97	0	28.92	16.81	9.3	14.25	6.09	83.88	62.91	59.92	49.18	81.92	66.04	97.07	72.14	72.82	37.72	52.41	51.6	61.73	35.1	33.68	38.57	43.7	39.75	72.97	70527	ENSMUSG00000006906	Stambp	STAM binding protein
Ezh1	210.11	158.44	184.39	161.26	141.39	113.79	290.55	218.57	225.9	146.41	144.38	159.84	54.57	164.26	240.97	123.26	67.4	107.68	109.65	178.94	223.14	249.2	275.03	186.8	179.25	360.17	233.84	120.32	231.97	109.88	176.42	142.54	182.52	195.03	172.32	200.16	180.11	171.19	14055	ENSMUSG00000006920	Ezh1	enhancer of zeste 1 polycomb repressive complex 2 subunit
Hap1	362.32	311.24	214.73	33.57	26.28	87.78	1005.13	1614.09	1352.37	3.22	1.6	0.3	5.2	0	0	16.81	20.92	25.34	21.32	0	6.43	5.12	5.46	8.35	26.13	33.47	0	0	7.54	8.84	42.44	0	4.68	5.53	1.64	3.5	2.48	1.4	15114	ENSMUSG00000006930	Hap1	huntingtin-associated protein 1
P3h4	6.07	1.25	0.95	6.58	3.63	4.33	6.64	8.24	10.04	0.36	1.6	0.6	18.19	0	0	0	4.65	0	0	11.18	29.92	27.04	16.39	25.57	21.05	24.77	0	0	6.6	0.32	0	0	0	1.01	0.82	0	2.48	2.25	66180	ENSMUSG00000006931	P3h4	prolyl 3-hydroxylase family member 4 (non-enzymatic)
Ctnnb1	367.84	420.84	384.43	765.51	637.18	710.91	312.67	408.94	563.24	1651.26	1428.68	2159.99	337.83	246.39	138.16	156.88	192.91	129.85	103.56	173.35	338.9	301.81	342.42	404.91	423.09	665.44	206.47	256.47	134.84	238.71	163.94	149.27	236.34	227.2	251.1	243.87	270.79	477.66	12387	ENSMUSG00000006932	Ctnnb1	catenin (cadherin associated protein)/ beta 1
Eif1b	127.94	100.83	148.37	196.15	216.62	280.68	165.92	147.45	214.85	273.48	240.63	236.75	155.92	296.58	109.24	212.9	146.43	186.86	115.75	240.45	289.41	275.5	242.24	316.2	373.02	287.2	14.93	158.31	155.59	233.02	122.33	105.5	170.82	128.18	123.09	186.18	196.26	212.73	68969	ENSMUSG00000006941	Eif1b	eukaryotic translation initiation factor 1B
Chrd	0	0	0	0	0	0	0	0	0	0	0	0	0	0	0	0	0	0	0	0	0	0	1.82	0	0	0	0	0	0	0	0	0	0	0	0	0	0	0	12667	ENSMUSG00000006958	Chrd	chordin
Psmd2	171.51	203.53	154.53	185.62	204.84	138.71	163.71	174.77	113.45	220.5	276.56	293.75	72.76	91.26	89.96	128.86	58.11	82.34	100.52	123.02	142.89	130.81	131.14	119.49	119.02	145.94	101.99	75.99	189.54	104.2	81.55	79.69	98.28	107.06	92.73	94.4	118	152.39	21762	ENSMUSG00000006998	Psmd2	proteasome (prosome/ macropain) 26S subunit/ non-ATPase/ 2
Syngr3	0	6.89	5.69	0	4.53	0	0	3.04	0	0.72	0	0	0	0	0	0	0	0	0	0	1.12	0	0	0.52	1.45	0	0	0	2.83	0	0	0	0	0.5	0.82	0	0	0	20974	ENSMUSG00000007021	Syngr3	synaptogyrin 3
Vars	75	134.64	79.16	137.57	213.9	164.72	144.54	115.79	120.48	110.25	109.73	114.6	241.68	533.85	472.31	282.94	204.53	235.95	435.57	556.39	388.67	289.39	344.24	275.5	101.6	151.3	353.24	414.78	165.96	192.92	208.88	206.51	147.42	305.61	274.08	278.83	206.2	120.12	22321	ENSMUSG00000007029	Vars	valyl-tRNA synthetase
Vwa7	0	0	0	0	0	0	2.95	0	0	0	0	2.71	0	0	0	0	0	0	0	2.8	11.74	18.27	10.93	23.48	7.98	11.38	0	0	4.71	0.95	25.8	0	0	1.01	0.82	5.24	1.24	1.12	27762	ENSMUSG00000007030	Vwa7	von Willebrand factor A domain containing 7
Hspa1l	1.1	4.38	20.86	5.92	3.63	1.08	0	0	0	0	0.32	0	0	0	0	2.8	0	4.75	0	0	0.28	1.46	1.82	4.17	0	0	0	0	2.83	6.63	4.16	13.47	11.7	25.64	22.16	7.87	13.66	17.12	15482	ENSMUSG00000007033	Hspa1l	heat shock protein 1-like
Slc44a4	82.72	95.82	96.23	202.73	84.29	198.32	0	2.17	0	1.79	3.85	1.81	12.99	0	0	0	0	0	0	0	0.28	2.19	0	0	0	0	0	0	0	0	0	0	0	0	0	0	0	0	70129	ENSMUSG00000007034	Slc44a4	solute carrier family 44/ member 4
Msh5	19.85	16.91	5.21	3.29	2.72	1.08	6.64	1.3	15.06	1.07	0.32	1.81	10.39	0	25.7	36.42	2.32	4.75	6.09	13.98	13.98	6.58	7.29	12	7.26	15.4	0	0	0.94	22.1	26.63	0	0	3.52	7.39	6.99	12.42	4.49	17687	ENSMUSG00000007035	Msh5	mutS homolog 5
Abhd16a	702.04	591.8	842.33	360.05	561.95	560.27	745.55	740.7	598.38	400.56	402.33	404.13	275.46	305.71	183.14	81.24	190.59	107.68	249.77	355.08	355.96	400.47	424.38	520.74	611.78	530.21	121.89	256.47	366.82	310.06	268.8	354.66	472.69	247.3	260.95	253.48	290.66	306.47	193742	ENSMUSG00000007036	Abhd16a	abhydrolase domain containing 16A
Neu1	194.67	169.71	186.29	423.9	375.24	580.87	747.76	978.34	1128.48	727.73	825.19	1163.24	44.18	63.88	205.63	324.96	195.23	418.06	380.74	240.45	279.62	241.89	326.03	266.11	295.37	378.25	472.65	598.42	794.92	518.46	603.34	650.96	510.13	434.79	375.83	367.11	396.24	335.09	18010	ENSMUSG00000007038	Neu1	neuraminidase 1
Ddah2	4.41	25.68	17.06	14.48	29	37.93	2.95	13.01	4.02	8.23	6.74	11.16	33.78	0	99.6	19.61	20.92	83.93	82.24	394.23	384.48	275.5	347.88	335.51	558.8	421.76	116.92	221.64	163.13	224.18	279.62	300.79	210.6	130.19	115.7	196.67	279.48	146.5	51793	ENSMUSG00000007039	Ddah2	dimethylarginine dimethylaminohydrolase 2
Clic1	2307.4	1352.06	1755.3	1568.55	1643.25	1526.94	1154.83	1271.93	1085.31	1776.19	1785.12	2017.34	4625.71	4900.48	6162.5	4880.01	4773.95	2761.7	4571.97	1082.03	1459.07	1693.95	1562.74	1971.3	1711.97	1583.94	3112	3805.82	2152.8	1897.02	2287.7	2553.32	2798.68	1598.42	1619.84	1794.47	1973.76	2751.46	114584	ENSMUSG00000007041	Clic1	chloride intracellular channel 1
Lsm2	44.67	45.09	32.23	57.27	40.79	24.93	37.61	37.73	14.06	63.36	83.74	66.05	101.35	45.63	41.77	5.6	69.73	45.92	12.18	67.1	49.77	69.42	63.75	41.74	15.97	32.13	29.85	307.13	63.18	46.41	64.08	54.99	44.46	54.79	51.7	70.8	43.47	83.91	27756	ENSMUSG00000007050	Lsm2	LSM2 homolog/ U6 small nuclear RNA and mRNA degradation associated
Pole	37.5	37.57	46.45	5.92	7.25	14.09	6.64	7.81	10.04	20.05	18.29	6.63	70.17	0	3.21	0	23.24	0	0	0	13.42	0	12.75	6.26	0	1.34	0	0	14.14	17.05	6.66	14.59	39.78	15.08	13.95	17.48	8.69	21.61	18973	ENSMUSG00000007080	Pole	polymerase (DNA directed)/ epsilon
Atp1a2	0	0	0.95	11.19	8.16	0	5.16	0.43	0	0.36	0.32	3.32	0	63.88	0	2.8	118.54	42.76	124.88	33.55	6.99	5.12	1.82	4.17	0.73	9.37	1325.89	503.43	82.04	105.78	783.09	283.95	37.44	66.85	79.6	102.27	88.19	172.04	98660	ENSMUSG00000007097	Atp1a2	ATPase/ Na+/K+ transporting/ alpha 2 polypeptide
Casq1	0	0	0.47	3.29	0	2.17	0	0	0	0	0	0	0	0	0	0	0	9.5	0	0	0	0	0	0	0	0	0	0	0	0.95	0	0	0	0	0	0.87	0	0	12372	ENSMUSG00000007122	Casq1	calsequestrin 1
Stx1a	0	0	5.69	3.95	4.53	0	0.74	0	0	1.79	2.25	0	0	0	0	0	2.32	1.58	0	30.76	54.81	43.85	98.35	50.61	68.22	93.06	0	0	2.83	12.63	40.78	10.1	2.34	8.55	13.95	0.87	6.21	7.58	20907	ENSMUSG00000007207	Stx1a	syntaxin 1A (brain)
Zfp775	4.41	8.77	25.6	16.46	29.91	22.76	9.59	9.97	1	5.37	5.13	10.25	0	4.56	0	11.21	2.32	39.59	0	22.37	37.75	40.92	52.82	33.92	14.51	34.81	111.94	41.16	32.06	14.21	3.33	30.3	9.36	12.57	27.9	15.73	6.21	31.15	243372	ENSMUSG00000007216	Zfp775	zinc finger protein 775
Scube2	0	0	0	1.32	0	0	0	0	0	0	0	0	0	0	0	0	0	0	0	0	0	0	0	0	0	0	0	0	0	0.63	0	0	0	0.5	0	0	3.73	1.96	56788	ENSMUSG00000007279	Scube2	signal peptide/ CUB domain/ EGF-like 2
Mrpl49	84.38	47.59	131.78	95.44	111.48	137.63	109.88	97.14	119.47	108.1	98.5	104.95	174.11	91.26	54.62	114.86	32.54	131.43	155.34	53.12	74.1	112.54	38.25	116.36	113.94	102.43	213.93	117.15	69.78	77.36	103.19	65.1	95.94	78.41	84.52	120.62	110.55	118.99	18120	ENSMUSG00000007338	Mrpl49	mitochondrial ribosomal protein L49
Dennd2c	44.12	20.67	19.91	10.53	12.69	3.25	11.06	8.24	7.03	0.36	0.32	0.3	18.19	18.25	0	28.01	0	49.09	21.32	33.55	62.36	44.58	51	62.09	23.95	54.9	32.34	0	24.52	17.68	25.8	15.71	30.42	34.18	43.49	26.22	44.72	38.45	329727	ENSMUSG00000007379	Dennd2c	DENN/MADD domain containing 2C
Mark3	333.1	320.01	365.94	140.86	114.2	132.21	203.53	152.22	297.18	137.1	94.33	146.57	194.9	333.09	109.24	193.3	285.88	88.68	76.15	338.31	268.44	241.89	289.6	173.75	190.14	151.3	4.98	164.64	207.45	148.72	117.34	204.27	112.32	174.42	202.69	242.12	144.09	178.21	17169	ENSMUSG00000007411	Mark3	MAP/microtubule affinity regulating kinase 3
Gatad1	150	168.46	175.39	131.64	150.46	141.97	111.35	144.41	122.49	137.1	120.95	181.56	275.46	114.07	83.54	56.03	171.99	178.94	60.92	75.49	65.71	70.16	107.46	71.48	69.67	91.05	44.78	123.48	72.61	93.78	74.07	147.03	229.32	99.02	95.19	86.53	118	155.76	67210	ENSMUSG00000007415	Gatad1	GATA zinc finger domain containing 1
Pcdha10	0	0	0	0	0	0	1.47	0.43	0	0	0	0	7.8	0	0	0	0	3.17	0	0	0	0	1.82	0	0	0	0	0	17.92	13.89	29.13	7.86	0	6.03	9.85	26.22	42.23	29.19	12943	ENSMUSG00000007440	Pcdha10	protocadherin alpha 10
M6pr	786.41	549.84	798.25	1069.61	1357.74	1005.68	918.85	1377.31	1668.63	1752.92	1479.69	2137.68	335.23	282.9	549.42	467.83	657.75	308.79	353.33	567.58	704.09	684.01	577.38	675.71	883.2	913.14	184.08	478.1	468.66	375.11	245.5	217.73	800.29	384.02	492.35	426.55	414.88	758.03	17113	ENSMUSG00000007458	M6pr	mannose-6-phosphate receptor/ cation dependent
Lrrc8a	57.35	14.4	62.57	44.76	21.75	41.18	41.3	21.25	103.41	22.19	7.7	10.56	0	50.19	51.41	28.01	2.32	14.25	0	61.51	93.95	89.16	56.46	87.14	219.17	131.21	124.38	85.49	72.61	156.93	100.7	50.51	112.32	40.21	54.16	51.57	55.9	47.99	241296	ENSMUSG00000007476	Lrrc8a	leucine rich repeat containing 8A VRAC subunit A
Ppp2r1a	462.69	409.56	403.86	484.45	251.97	356.54	294.24	199.05	169.67	509.02	465.53	613.44	265.07	187.08	363.07	249.32	190.59	190.03	188.85	195.72	338.9	398.28	397.06	356.9	196.67	325.36	355.73	668.08	347.01	285.75	289.6	150.39	301.86	251.83	298.69	292.81	278.24	497.31	51792	ENSMUSG00000007564	Ppp2r1a	protein phosphatase 2/ regulatory subunit A/ alpha
Fance	59.56	51.35	68.26	69.77	72.51	94.28	79.64	50.74	39.16	56.56	49.09	58.81	49.38	0	73.9	78.44	30.21	57.01	27.41	187.33	212.79	225.08	287.78	228.02	105.23	113.14	0	3.17	61.29	68.83	49.1	22.45	56.16	66.35	76.31	55.07	29.81	65.95	72775	ENSMUSG00000007570	Fance	Fanconi anemia/ complementation group E
Tinf2	142.28	79.53	217.1	94.13	91.54	104.04	123.89	135.3	113.45	37.94	72.19	76	49.38	196.2	51.41	42.02	46.48	22.17	63.96	75.49	72.14	62.85	85.6	74.09	87.81	91.05	82.09	0	41.49	68.2	74.9	59.48	23.4	67.86	55.8	43.7	31.05	60.06	28113	ENSMUSG00000007589	Tinf2	Terf1 (TRF1)-interacting nuclear factor 2
Tssk4	9.93	7.51	2.84	4.61	1.81	0	11.8	14.31	11.04	5.01	0.96	3.32	0	0	0	0	0	0	12.18	19.57	2.24	1.46	0	2.61	0	0	34.83	0	0.94	6.95	0	0	0	5.53	5.74	5.24	0	5.05	71099	ENSMUSG00000007591	Tssk4	testis-specific serine kinase 4
Hapln4	2.21	0	0	0	0	1.08	0	0	0	0.36	0.96	0	0	0	0	0	0	0	0	0	0.28	0.73	0	0.52	0	0	0	0	0	0	0	0	0	0	0	0	0	0	330790	ENSMUSG00000007594	Hapln4	hyaluronan and proteoglycan link protein 4
Dus3l	135.11	117.73	127.99	219.19	143.21	164.72	293.5	191.25	224.89	134.59	135.71	154.41	153.32	177.95	151.01	134.47	109.24	137.77	97.47	357.88	263.4	331.04	307.81	372.03	279.4	309.96	47.26	148.81	180.11	115.88	143.14	189.68	194.22	127.67	153.45	91.78	98.13	101.87	224907	ENSMUSG00000007603	Dus3l	dihydrouridine synthase 3-like (S, cerevisiae)
Gtpbp3	12.68	26.3	18.96	38.84	38.97	43.35	62.68	54.21	60.24	25.06	26.95	23.83	15.59	22.81	80.32	50.42	27.89	52.26	0	75.49	67.39	29.23	45.53	70.44	75.47	65.61	27.36	34.83	18.86	25.26	29.96	33.67	14.04	30.16	30.36	20.98	29.81	35.64	70359	ENSMUSG00000007610	Gtpbp3	GTP binding protein 3
Tgfbr1	121.33	140.91	76.79	1175.59	1926.03	1415.32	366.51	454.91	466.85	883.44	625.63	878.84	657.47	1473.79	2098.08	2187.88	1982.56	1966.76	849.82	3576.01	2972.94	3052.48	3338.59	3115.06	4574.93	5442.72	39.8	63.32	58.46	154.72	108.18	94.28	395.47	388.04	467.74	166.07	214.89	337.34	21812	ENSMUSG00000007613	Tgfbr1	transforming growth factor/ beta receptor I
Homer1	114.71	138.4	77.27	30.94	21.75	20.59	38.35	32.96	99.39	68.37	56.47	75.1	67.57	77.57	25.7	42.02	9.3	25.34	21.32	27.96	11.18	8.77	21.86	14.61	16.69	41.51	57.21	0	50.92	32.84	29.96	21.32	51.48	42.22	36.11	62.06	38.51	60.9	26556	ENSMUSG00000007617	Homer1	homer scaffolding protein 1
Rad51c	19.3	27.55	37.45	6.58	3.63	24.93	2.95	1.73	0	4.3	2.57	4.83	0	0	19.28	0	0	0	0	0	1.68	0.73	0	0	0	0	0	0	1.89	2.53	1.66	0	7.02	10.05	9.03	7.87	6.21	8.42	114714	ENSMUSG00000007646	Rad51c	RAD51 paralog C
Cav1	15.44	2.5	6.64	22.38	15.41	0	1.47	0.87	0	193.66	110.37	113.4	0	0	0	8.4	55.78	6.33	6.09	2.8	0.56	6.58	0	1.57	0	0.67	0	15.83	0.94	6	1.66	0	14.04	6.53	1.64	0	4.97	12.35	12389	ENSMUSG00000007655	Cav1	caveolin 1/ caveolae protein
Arpp19	1120.06	1120.35	1007.29	533.16	602.73	435.65	403.38	308.77	316.26	636.09	908.92	481.94	1325.34	1117.89	944.62	1675.23	1180.7	937.46	2025.56	542.41	459.7	458.2	369.74	558.83	396.24	302.6	1216.44	794.73	764.75	628.02	775.6	747.48	680.95	1044	1184.93	865.33	1079.42	486.08	59046	ENSMUSG00000007656	Arpp19	cAMP-regulated phosphoprotein 19
Bcl2l1	743.95	751.5	933.35	177.72	196.68	202.65	123.15	89.33	119.47	138.89	156.57	209	296.25	136.88	758.26	207.3	234.75	636.58	231.49	369.06	265.64	345.66	362.45	341.25	124.82	162.68	134.33	53.83	263.09	161.66	223.03	310.89	519.49	298.57	265.87	336.52	325.44	203.19	12048	ENSMUSG00000007659	Bcl2l1	BCL2-like 1
Khsrp	70.59	40.71	56.88	42.78	87.01	107.29	63.42	75.02	133.53	72.31	59.68	67.25	2.6	237.27	154.22	134.47	158.05	88.68	94.42	145.39	126.67	71.62	112.93	75.66	105.23	109.12	830.86	509.76	303.64	81.78	110.68	88.66	114.66	76.4	68.93	101.39	70.8	73.53	16549	ENSMUSG00000007670	Khsrp	KH-type splicing regulatory protein
Dio2	2.21	0	1.42	0	0	0	0	0	0	0	0	0	0	0	0	0	0	0	9.14	0	0	0	0	0	0.73	0	0	0	0	0.63	0	0	0	0.5	0	0	0	0.28	13371	ENSMUSG00000007682	Dio2	deiodinase/ iodothyronine/ type II
Ccdc124	235.48	319.39	222.32	157.32	169.49	160.39	205.01	132.7	85.34	200.81	308.32	275.35	790.01	638.8	385.56	198.9	251.02	422.81	514.77	315.94	178.4	312.77	278.67	210.28	109.58	194.81	465.18	414.78	452.63	319.22	619.15	612.8	255.06	408.15	305.26	493.85	593.74	211.89	234388	ENSMUSG00000007721	Ccdc124	coiled-coil domain containing 124
Cct4	229.97	330.66	306.22	196.15	203.03	182.06	136.43	229.84	258.02	255.58	275.6	245.19	161.12	146.01	314.87	156.88	144.1	367.38	258.91	148.18	104.86	135.19	160.28	141.4	281.58	234.31	87.07	44.33	202.74	295.86	131.49	209.88	215.28	262.38	292.95	277.08	242.22	232.38	12464	ENSMUSG00000007739	Cct4	chaperonin containing Tcp1/ subunit 4 (delta)
0610009B22Rik	55.7	40.08	57.83	96.76	97.89	112.71	45.72	60.28	133.53	82.69	59.35	54.89	72.76	0	25.7	50.42	58.11	23.75	15.23	111.84	110.17	112.54	78.32	130.97	154.58	131.21	24.88	186.81	74.49	29.36	52.43	19.08	88.92	66.35	47.59	59.44	90.68	128.26	66050	ENSMUSG00000007777	0610009B22Rik	RIKEN cDNA 0610009B22 gene
Cpt1c	0.55	5.01	0	1.97	0	11.92	1.47	0	0	1.43	0	0	0	0	0	0	16.27	1.58	0	11.18	5.59	4.38	5.46	5.22	6.53	2.68	37.31	0	27.35	19.89	32.46	56.12	23.4	12.57	7.39	8.74	6.21	5.61	78070	ENSMUSG00000007783	Cpt1c	carnitine palmitoyltransferase 1c
Twist2	0	0	0	0	4.53	6.5	0	0	0	0	0	0	0	0	0	0	0	0	0	0	0	0	0	0	0	0	0	0	0	0	0	0	0	0	0	0	0	0	13345	ENSMUSG00000007805	Twist2	twist basic helix-loop-helix transcription factor 2
Zfp655	23.16	59.49	23.23	30.94	27.19	21.67	39.82	56.81	53.21	34.36	36.25	21.41	46.78	0	35.34	0	37.19	55.42	15.23	30.76	24.89	19	36.43	28.18	20.32	27.45	64.68	0	32.06	36	37.45	26.94	11.7	41.72	40.21	48.95	27.33	34.8	72611	ENSMUSG00000007812	Zfp655	zinc finger protein 655
Rhoa	719.68	569.26	756.54	754.98	618.14	772.68	506.62	519.53	636.53	1495.55	1339.81	1357.16	769.22	657.05	539.78	540.67	836.72	967.54	892.46	315.94	463.61	583.16	453.52	517.61	801.19	606.53	713.94	835.89	751.55	888.83	920.4	1048.27	1506.98	614.24	601.49	774.43	742.8	1579.76	11848	ENSMUSG00000007815	Rhoa	ras homolog family member A
Zmiz1	87.13	63.88	132.25	125.72	107.86	238.41	142.33	88.03	197.79	274.55	108.76	212.92	595.11	1031.2	632.96	375.39	787.91	536.82	332.01	1683.15	1330.72	520.32	515.45	428.91	315.69	218.91	1460.23	310.29	244.23	474.57	751.47	419.76	358.03	421.22	376.65	342.64	326.68	214.13	328365	ENSMUSG00000007817	Zmiz1	zinc finger/ MIZ-type containing 1
Ankrd26	8.27	9.39	12.32	26.99	17.22	19.51	33.18	33.83	25.1	25.42	10.59	14.78	80.56	41.07	0	64.43	39.51	22.17	3.05	81.08	102.34	34.35	25.5	32.35	15.97	21.42	24.88	0	36.78	35.36	80.72	35.91	72.54	59.31	54.98	83.04	45.96	37.33	232339	ENSMUSG00000007827	Ankrd26	ankyrin repeat domain 26
Aldh16a1	199.64	233.59	175.86	251.44	203.93	237.33	516.21	283.62	195.78	175.04	228.43	289.23	109.15	68.44	318.09	173.69	58.11	248.62	466.03	201.31	196.57	266.74	313.28	219.67	126.28	144.6	34.83	148.81	248	181.56	272.96	209.88	128.7	194.02	160.84	274.46	181.35	142.57	69748	ENSMUSG00000007833	Aldh16a1	aldehyde dehydrogenase 16 family/ member A1
Hnrnpa0	504.61	561.12	730.46	501.57	405.15	512.59	341.43	326.98	346.38	476.09	536.11	939.46	83.16	196.2	189.57	369.78	306.8	345.21	289.37	363.47	385.04	363.93	346.06	357.94	473.17	441.17	119.41	563.59	254.6	319.22	258.81	375.98	196.56	260.87	248.64	275.33	267.06	512.18	77134	ENSMUSG00000007836	Hnrnpa0	heterogeneous nuclear ribonucleoprotein A0
Prrg2	202.95	154.68	131.78	170.48	109.67	146.3	140.85	111.02	136.54	121.71	145.66	191.51	49.38	150.57	141.37	92.45	120.86	193.19	365.51	75.49	112.41	118.39	140.25	158.1	143.69	196.15	79.6	221.64	174.45	201.45	226.36	307.52	163.8	91.98	96.83	178.31	120.49	152.95	65116	ENSMUSG00000007837	Prrg2	proline-rich Gla (G-carboxyglutamic acid) polypeptide 2
Hnrnph1	327.03	199.77	193.4	115.19	125.08	237.33	159.29	211.63	555.21	167.88	130.9	126.06	171.52	114.07	134.95	243.72	158.05	158.35	100.52	419.39	376.37	333.24	371.56	266.63	324.4	328.71	42.29	183.64	155.59	349.85	136.48	131.31	339.31	226.19	236.33	263.97	212.41	278.96	59013	ENSMUSG00000007850	Hnrnph1	heterogeneous nuclear ribonucleoprotein H1
Ift43	188.61	88.93	156.43	51.34	24.47	88.86	25.07	42.07	44.18	49.4	42.99	57.6	46.78	73.01	3.21	14.01	34.86	38.01	18.28	0	13.14	19	38.25	14.61	26.13	8.7	0	0	76.38	21.47	43.27	24.69	21.06	29.15	26.26	13.99	48.44	31.43	76411	ENSMUSG00000007867	Ift43	intraflagellar transport 43
Id3	137.32	54.48	97.65	471.29	336.26	288.27	10.32	12.58	9.04	177.55	158.17	380.91	7.8	0	57.83	159.68	127.83	221.7	392.93	0	1.4	1.46	0	1.57	7.26	3.35	32.34	56.99	217.83	190.71	106.52	97.64	1850.97	753.97	190.38	406.44	731.62	201.22	15903	ENSMUSG00000007872	Id3	inhibitor of DNA binding 3
Tcap	0.55	0.63	0	1.97	9.97	0	0	4.34	0	0.72	0.96	0.6	0	0	19.28	2.8	13.95	0	24.37	11.18	3.91	1.46	12.75	6.26	8.71	2.01	0	0	59.41	7.89	65.74	86.42	93.6	98.52	107.5	111.01	93.16	63.71	21393	ENSMUSG00000007877	Tcap	titin-cap
Arid1a	87.69	145.29	121.35	310.02	279.16	253.59	359.13	287.52	382.52	290.66	170.04	216.84	210.5	109.51	102.82	218.51	390.47	126.68	219.31	1177.09	1379.65	806.05	846.94	626.66	341.09	461.26	92.04	189.97	96.18	114.93	105.69	216.61	163.8	371.46	340.54	231.63	234.76	265.49	93760	ENSMUSG00000007880	Arid1a	AT rich interactive domain 1A (SWI-like)
Crlf1	29.23	5.64	12.8	1.97	0	0	0	0	0	0	0	0	10.39	0	0	11.21	25.57	0	0	0	0	0	0	0	0	0	0	0	0	0	0	0	0	0.5	0	1.75	1.24	0.56	12931	ENSMUSG00000007888	Crlf1	cytokine receptor-like factor 1
Ctsd	177.03	266.78	174.91	2592.08	3027.27	2069.87	13576.3	11983.4	8791.92	21774.3	30048.7	27905.9	337.83	155.14	7630.84	5331.03	4460.18	7094.27	10919.7	43837.5	32615.1	53018.3	49521.4	41668.7	34981.8	43772.7	3641.86	2181.54	10033.2	6227.5	6727.44	4326.62	3598.98	4008.12	2230.36	5582.71	6002.03	2963.35	13033	ENSMUSG00000007891	Ctsd	cathepsin D
Rplp1	31515	17209.2	24778.9	9403.38	12263.2	19444.9	7736.49	8248.71	12672.3	10282.4	11172.8	8635.45	35054	31063.7	23448.4	23380.3	19107.4	26332.7	46788.8	8812.8	4600.9	7472.25	6309.25	4935.04	10476.5	6647.74	27032.8	24956.3	21934.5	17112.6	25014.9	25056.2	34939.1	17871.7	21264.7	21389.5	16845.9	12650.7	56040	ENSMUSG00000007892	Rplp1	ribosomal protein/ large/ P1
Hmgcll1	0	0	0	0	0	0	0	0	0	0	0	0	0	0	0	0	0	0	0	0	0	0	0	0	0	0	0	0	0	0	0	0	0	0	0	0	0	2.25	208982	ENSMUSG00000007908	Hmgcll1	3-hydroxymethyl-3-methylglutaryl-Coenzyme A lyase-like 1
Ttc9b	0	0	0	0	0	0	0	0	0	0	0	0	0	0	0	0	0	0	0	0	2.24	0	5.46	0	1.45	0	0	0	0	0	0	0	0	0	0	0	0	0	73032	ENSMUSG00000007944	Ttc9b	tetratricopeptide repeat domain 9B
Phox2a	0	0	0	0	0	1.08	0	0	2.01	0	0	0.3	0	0	0	0	2.32	0	0	0	0.28	0	1.82	0.52	0	0	0	0	2.83	0	0	0	14.04	0	0.82	0	0	0.28	11859	ENSMUSG00000007946	Phox2a	paired-like homeobox 2a
Abhd8	24.82	5.01	18.01	57.92	47.13	37.93	47.2	49	22.09	46.53	76.36	54.59	114.34	4.56	41.77	67.23	37.19	104.51	124.88	69.9	85.28	93.54	154.82	89.23	55.88	94.39	37.31	0	80.15	31.89	84.05	120.09	18.72	69.87	60.72	53.32	69.56	19.65	64296	ENSMUSG00000007950	Abhd8	abhydrolase domain containing 8
Ift22	88.79	124.62	116.61	91.49	89.73	84.53	44.98	45.53	13.05	45.1	64.49	70.27	254.67	31.94	112.45	198.9	95.29	28.5	124.88	39.14	32.44	46.77	63.75	32.87	31.21	42.85	47.26	155.15	90.53	154.09	98.2	83.05	53.82	99.02	73.85	113.63	93.16	70.16	67286	ENSMUSG00000007987	Ift22	intraflagellar transport 22
Fzd3	0	0.63	0	1.32	2.72	0	0	0	0	0	0	0	0	0	0	0	0	0	0	0	0.56	0	0	0.52	0	0	0	0	0	0	0	0	0	1.01	0	0	0	0	14365	ENSMUSG00000007989	Fzd3	frizzled class receptor 3
1700008O03Rik	6.62	13.78	21.33	1.97	0.91	0	2.95	2.17	1	1.43	1.93	0.6	2.6	0	0	0	0	0	6.09	16.78	4.47	5.12	9.11	5.22	2.9	0	0	0	14.14	7.58	4.16	0	0	5.03	0	15.73	9.94	2.25	69349	ENSMUSG00000008028	1700008O03Rik	RIKEN cDNA 1700008O03 gene
Mid1ip1	97.61	29.43	82.01	173.77	99.7	226.49	55.31	85.87	110.44	58.71	57.75	105.56	18.19	73.01	89.96	58.83	37.19	102.93	146.21	153.78	239.64	339.81	428.02	259.33	550.09	554.31	72.14	297.63	279.12	400.05	167.27	286.2	222.3	143.76	144.42	126.74	226.07	227.89	68041	ENSMUSG00000008035	Mid1ip1	Mid1 interacting protein 1 (gastrulation specific G12-like (zebrafish))
Ap2s1	512.33	605.58	658.41	916.91	795.79	651.31	761.78	519.53	355.41	695.51	1096.29	892.41	1481.27	1136.14	1121.33	700.35	1001.74	1094.23	1638.72	810.82	485.42	818.48	826.91	583.88	373.02	499.42	2788.61	1982.07	2028.33	1834.18	2467.45	1884.41	2208.99	1723.58	1422.9	2866.96	2187.41	1821.68	232910	ENSMUSG00000008036	Ap2s1	adaptor-related protein complex 2/ sigma 1 subunit
Fgfrl1	16.54	27.55	23.7	24.35	1.81	28.18	22.86	8.67	10.04	9.31	15.08	18.4	0	0	0	0	2.32	4.75	24.37	22.37	26.56	30.69	47.36	19.83	16.69	36.15	0	0	8.49	12	1.66	7.86	16.38	18.1	20.51	11.36	6.21	12.91	116701	ENSMUSG00000008090	Fgfrl1	fibroblast growth factor receptor-like 1
4930432K21Rik	15.44	7.51	0	0.66	0	5.42	5.16	7.37	0	0.36	0.32	4.83	0	0	22.49	58.83	0	25.34	0	8.39	4.19	5.12	0	4.7	0	0	0	0	0	0.32	0	0	0	4.52	5.74	0.87	0	5.33	74666	ENSMUSG00000008129	4930432K21Rik	RIKEN cDNA 4930432K21 gene
Fhl2	7.72	5.64	0.47	16.46	8.16	32.51	0	0	0	0	1.93	0	0	0	0	0	6.97	0	0	0	0	0	0	0	0	0	0	0	0	0.32	0	0	7.02	20.11	36.93	30.59	16.15	24.42	14200	ENSMUSG00000008136	Fhl2	four and a half LIM domains 2
Emc10	410.3	556.11	549.86	387.04	614.52	347.87	578.89	562.46	271.08	390.18	479.01	398.1	683.46	305.71	465.88	204.5	251.02	590.66	840.68	444.55	322.96	526.16	601.05	597.97	627.75	873.65	121.89	1029.03	577.1	653.6	613.33	959.6	482.05	429.76	352.03	389.84	393.76	272.23	69683	ENSMUSG00000008140	Emc10	ER membrane protein complex subunit 10
Clstn3	0	4.38	0.47	0	0	0	2.21	0	0	2.86	0	0	0	0	0	0	0	0	0	0	0.84	0	0	0	0	0	0	0	0	0	0	0	0	0	0.82	0	2.48	0	232370	ENSMUSG00000008153	Clstn3	calsyntenin 3
Fbxw9	62.32	45.09	83.43	38.84	50.76	62.85	50.88	51.17	47.19	30.78	30.48	28.05	23.39	0	64.26	28.01	16.27	49.09	27.41	19.57	43.06	48.23	71.03	54.79	43.54	82.34	12.44	0	44.32	49.26	49.1	53.87	23.4	14.58	14.77	13.99	6.21	23.85	68628	ENSMUSG00000008167	Fbxw9	F-box and WD-40 domain protein 9
Spib	0	0	0.95	2.63	26.28	11.92	15.49	11.71	0	12.17	13.15	5.73	0	0	0	0	0	0	0	0	0	0	0	0	1.45	0	0	0	0	0	0	0	9.36	28.15	18.87	0	3.73	0.56	272382	ENSMUSG00000008193	Spib	Spi-B transcription factor (Spi-1/PU,1 related)
Fnbp4	212.87	186	241.28	179.04	150.46	185.31	287.6	288.39	317.26	194.37	160.42	199.05	140.33	0	64.26	140.07	151.07	88.68	176.66	220.88	211.95	130.08	211.28	231.15	211.91	194.14	151.74	82.32	146.16	155.66	86.55	97.64	95.94	145.77	158.37	103.14	88.19	134.43	55935	ENSMUSG00000008200	Fnbp4	formin binding protein 4
Cers4	69.49	19.41	34.6	59.24	17.22	46.6	0.74	6.94	0	3.22	1.6	3.32	31.18	0	3.21	0	20.92	3.17	21.32	5.59	13.42	11.69	14.57	19.31	12.34	29.46	4.98	28.5	91.47	62.52	88.21	109.99	25.74	81.93	58.26	25.35	38.51	27.5	67260	ENSMUSG00000008206	Cers4	ceramide synthase 4
Scrn3	158.28	110.85	103.34	19.09	38.07	41.18	36.13	51.61	42.17	52.98	43.63	43.43	20.79	0	41.77	56.03	58.11	7.92	9.14	16.78	40.82	49.69	29.14	48.53	98.7	93.72	99.5	44.33	57.52	27.47	31.62	41.53	32.76	40.71	22.16	19.23	27.33	51.64	74616	ENSMUSG00000008226	Scrn3	secernin 3
Phax	137.87	170.34	159.27	125.72	159.52	183.15	142.33	209.89	230.92	145.69	160.1	138.13	340.43	223.58	122.09	243.72	248.69	308.79	70.06	100.65	171.13	148.35	102	153.93	291.74	164.69	129.36	503.43	325.33	254.81	289.6	328.85	210.6	212.62	236.33	203.66	206.2	207.12	56698	ENSMUSG00000008301	Phax	phosphorylated adaptor for RNA export
Tle1	109.19	113.98	149.32	104	135.96	109.45	95.87	151.35	182.73	89.49	134.75	148.99	116.94	86.69	266.68	316.56	309.12	259.7	130.98	5.59	20.13	25.58	10.93	13.57	28.3	28.12	0	0	7.54	38.21	18.31	19.08	65.52	40.21	78.78	15.73	33.54	24.98	21885	ENSMUSG00000008305	Tle1	transducin-like enhancer of split 1
1700109H08Rik	0	0	2.37	2.63	0.91	7.59	6.64	5.2	1	7.16	5.13	5.73	2.6	0	0	2.8	4.65	15.84	0	8.39	2.52	6.58	5.46	2.61	9.43	0.67	0	0	2.83	0.63	0.83	0	2.34	7.04	9.03	2.62	0	1.96	77036	ENSMUSG00000008307	1700109H08Rik	RIKEN cDNA 1700109H08 gene
Relt	44.12	64.5	66.84	121.77	117.83	84.53	215.33	160.46	129.51	121.35	119.99	193.62	51.97	0	106.03	64.43	39.51	76.01	112.7	19.57	45.02	57	65.57	59.48	41.37	44.85	256.22	31.66	100.9	129.14	70.74	114.48	105.3	129.68	135.4	98.77	104.34	68.48	320100	ENSMUSG00000008318	Relt	RELT tumor necrosis factor receptor
Snrpb2	145.59	219.81	181.08	145.47	155.9	152.8	106.93	117.52	167.67	179.34	165.55	95.6	75.36	374.15	154.22	106.45	230.1	174.19	204.08	159.37	138.41	205.35	125.68	187.32	112.49	164.02	89.55	132.98	184.82	190.71	135.65	99.89	117	166.88	192.02	202.79	190.05	248.37	20639	ENSMUSG00000008333	Snrpb2	U2 small nuclear ribonucleoprotein B
Ubc	2665.87	2224.43	3047.95	7392.51	5753.63	4650.17	3372.31	2694.35	2256.96	2932.76	3370.37	3747.57	1954.23	1628.93	3894.14	2011.39	1922.13	5042	5287.77	2815.51	3615.51	4229.04	4373.13	7030.01	3494.34	3956.51	2174.17	8130.9	8164.25	5745.67	4466.38	5101.04	10431.9	8432.44	6031.33	5971.67	6941.09	5206.28	22190	ENSMUSG00000008348	Ubc	ubiquitin C
Prpf31	125.19	138.4	85.8	140.86	135.05	82.36	123.89	107.98	70.28	195.45	175.82	203.27	80.56	123.2	22.49	128.86	62.75	159.94	51.78	83.88	113.81	78.92	76.5	102.79	96.52	117.83	12.44	63.32	70.72	87.46	109.02	92.03	91.26	107.57	128.01	102.27	90.68	115.91	68988	ENSMUSG00000008373	Prpf31	pre-mRNA processing factor 31
Sertad1	427.4	338.8	461.22	160.61	163.15	128.96	46.46	73.72	58.23	201.17	288.43	344.12	220.89	22.81	234.55	226.91	292.85	305.62	600.05	25.16	35.51	43.12	51	46.96	34.83	60.92	559.71	737.73	528.06	887.88	1031.92	879.91	1088.12	475	530.92	517.45	480.71	290.47	55942	ENSMUSG00000008384	Sertad1	SERTA domain containing 1
Carhsp1	99.82	80.79	83.43	114.53	91.54	182.06	73.01	64.62	33.13	204.04	250.57	204.18	127.34	0	54.62	86.84	130.16	128.27	170.57	19.57	26.28	30.69	51	29.22	32.66	66.28	231.35	167.81	195.2	136.4	166.44	181.82	234	132.7	114.06	190.55	187.56	194.21	52502	ENSMUSG00000008393	Carhsp1	calcium regulated heat stable protein 1
Elk3	109.75	87.05	64.94	237.62	283.69	231.91	92.92	82.4	102.41	149.63	100.74	115.51	187.11	177.95	334.15	392.19	218.48	302.46	265	928.25	631.95	501.32	522.74	420.56	505.1	577.08	1301.02	807.39	340.41	478.67	545.92	580.25	138.06	284.5	249.46	335.64	356.49	252.3	13713	ENSMUSG00000008398	Elk3	ELK3/ member of ETS oncogene family
Herpud2	78.31	102.08	109.02	101.37	132.33	54.19	77.43	121.43	128.51	107.03	96.25	97.72	127.34	223.58	96.39	131.66	55.78	72.84	3.05	64.31	80.53	104.5	98.35	111.66	167.64	160	106.97	69.66	33	155.35	91.54	68.46	98.28	141.24	135.4	146.84	144.09	197.86	80517	ENSMUSG00000008429	Herpud2	HERPUD family member 2
Rdh13	13.24	18.79	16.59	13.16	21.75	4.33	16.22	10.41	9.04	15.03	24.7	10.56	0	0	48.19	2.8	39.51	26.92	21.32	11.18	9.79	21.92	20.04	27.65	16.69	20.75	0	0	14.14	30.63	17.48	41.53	16.38	3.02	9.85	1.75	13.66	5.05	108841	ENSMUSG00000008435	Rdh13	retinol dehydrogenase 13 (all-trans and 9-cis)
Adam21	0	0	0	0	0	0	0	0	0	0	0	0	0	0	0	0	0	0	0	0	0.56	0	0	0	0	2.01	0	0	0	0	0	0	0	0	0	0	0	0.28	56622	ENSMUSG00000008438	Adam21	a disintegrin and metallopeptidase domain 21
Nutf2	17.1	33.82	20.86	15.8	24.47	0	19.91	29.92	13.05	27.2	33.05	26.84	38.98	13.69	19.28	30.82	11.62	1.58	0	5.59	22.93	32.89	32.78	31.31	36.29	74.31	2.49	0	25.46	17.68	8.32	14.59	65.52	19.6	12.31	26.22	13.66	24.14	68051	ENSMUSG00000008450	Nutf2	nuclear transport factor 2
Fut1	4.96	0.63	0	1.97	0.91	0	0	0	0	0	0	0	0	0	0	0	2.32	0	0	0	0	0	0	0	0	0	0	0	0	0	0.83	2.24	0	1.01	0	0.87	0	0	14343	ENSMUSG00000008461	Fut1	fucosyltransferase 1
Arpc5	2327.81	1591.29	2235.95	930.07	1266.2	1361.13	961.62	1457.54	1770.03	2392.24	2331.83	1930.18	1847.68	830.43	1041.01	890.84	1280.65	1206.66	1242.75	279.59	299.48	347.12	380.67	374.64	657.5	733.73	574.64	1298.16	1008.98	1638.42	898.77	936.03	2122.41	865.06	809.92	1058.5	949	1616.53	67771	ENSMUSG00000008475	Arpc5	actin related protein 2/3 complex/ subunit 5
Rnf151	1.65	0	0	0	0	0	0	0	0	1.07	0.64	0	0	0	0	0	0	0	0	0	0	0	0	0.52	0	1.34	0	0	0	0	0	0	0	0	0	0	0	0	67504	ENSMUSG00000008482	Rnf151	ring finger protein 151
Pou2f2	0.55	8.14	8.06	1117.66	672.53	701.16	3317.74	2174.82	2113.39	33.29	19.89	11.16	470.37	483.66	1230.57	921.65	625.22	633.42	740.17	3399.86	2959.24	1818.92	2030.84	2274.46	702.5	690.21	194.03	493.93	148.99	299.96	456.87	319.87	877.51	1110.85	1375.31	631.96	681.94	502.92	18987	ENSMUSG00000008496	Pou2f2	POU domain/ class 2/ transcription factor 2
Mgst1	46.88	8.77	7.58	175.09	59.82	192.9	364.3	448.41	694.76	1057.41	1144.42	903.57	5.2	0	0	14.01	4.65	80.76	130.98	0	0	0	1.82	13.57	2.9	4.02	129.36	126.65	165.02	246.28	165.61	226.71	32.76	31.67	21.34	45.45	48.44	129.1	56615	ENSMUSG00000008540	Mgst1	microsomal glutathione S-transferase 1
Nfib	42.46	23.17	11.85	28.96	8.16	11.92	1.47	6.5	0	1.79	1.6	0	2.6	4.56	19.28	2.8	2.32	3.17	6.09	0	0	0	0	0.52	1.45	0	0	0	0.94	2.21	0.83	4.49	0	9.55	2.46	5.24	11.18	12.35	18028	ENSMUSG00000008575	Nfib	nuclear factor I/B
Rab25	98.72	59.49	44.08	288.3	52.57	213.49	1.47	1.73	1	2.86	8.02	2.11	241.68	73.01	0	2.8	0	14.25	0	0	1.68	5.12	7.29	2.09	15.24	7.36	0	0	0	0.95	13.32	5.61	0	0.5	3.28	1.75	0	2.25	53868	ENSMUSG00000008601	Rab25	RAB25/ member RAS oncogene family
Ubqln4	51.84	79.53	52.14	74.38	57.1	57.44	97.34	96.27	60.24	83.4	122.56	97.41	41.58	45.63	51.41	42.02	34.86	17.42	24.37	16.78	58.44	60.65	69.21	79.31	60.96	62.26	0	44.33	132.96	37.57	31.62	70.71	72.54	68.86	68.93	47.2	60.86	116.47	94232	ENSMUSG00000008604	Ubqln4	ubiquilin 4
Rbfox1	451.11	233.59	313.8	0	0	0	0	0	0	0.36	0.32	0	0	0	122.09	137.27	244.04	101.35	60.92	47.53	76.34	53.35	40.07	63.14	82.73	31.46	2.49	0	0	0	0	0	0	0.5	0	2.62	2.48	1.12	268859	ENSMUSG00000008658	Rbfox1	RNA binding protein/ fox-1 homolog (C, elegans) 1
Rps18	19076.3	10871	16209.1	4096.78	6160.58	8304.42	2983.68	3835.32	5160.5	4559.32	4729.74	4457.21	10337.7	7419.16	8543.32	10765.7	9496.76	13996.9	15241.9	3592.78	2339.88	2886.59	2724.78	2121.06	2743.94	1860.43	5010.04	6335.64	6331.11	4337.75	9496.14	7794.65	9172.94	9024.56	10036.6	7140.31	7270.26	4062.08	20084	ENSMUSG00000008668	Rps18	ribosomal protein S18
Rpl10	1704.08	1729.69	1697.47	489.06	928.12	1124.88	516.95	647.89	722.87	699.81	778.34	398.7	4121.56	3449.5	5648.43	6143.43	5845.41	4813.97	6466.55	276.8	295.84	332.51	369.74	391.86	645.89	465.94	4301.07	2390.51	4556.44	4435	3530.16	3696.99	2269.83	1826.63	1907.87	1821.57	1753.9	1143.64	110954	ENSMUSG00000008682	Rpl10	ribosomal protein L10
Rps15a	716.38	1195.5	547.97	601.62	390.64	561.36	665.91	373.82	494.97	750.28	708.4	526.88	701.65	269.21	771.12	605.1	581.06	367.38	420.34	486.49	304.51	334.7	247.71	381.95	140.06	146.61	236.32	348.29	194.25	234.29	247.16	193.04	376.75	1359.66	1291.61	856.59	873.23	838.01	267019	ENSMUSG00000008683	Rps15a	ribosomal protein S15A
NA	0	5.64	0	0	0	0	0	0	0	0	0.32	0	0	0	0	0	0	0	0	8.39	3.36	5.12	3.64	1.57	0	0	0	0	0	0.32	0	3.37	2.34	1.51	2.46	5.24	4.97	1.68	NA	ENSMUSG00000008686	NA	NA
Ncaph2	366.74	643.78	357.89	306.73	232.94	174.48	385.68	272.77	144.57	218.71	359.01	333.26	210.5	150.57	308.45	352.97	257.99	201.11	335.05	545.21	348.41	425.32	428.02	368.38	169.09	253.06	283.59	218.47	402.65	279.44	348.69	270.48	226.98	501.64	511.23	541.05	714.23	330.88	52683	ENSMUSG00000008690	Ncaph2	non-SMC condensin II complex/ subunit H2
Hipk1	199.64	109.59	220.42	282.38	372.52	342.45	129.79	219.43	225.9	313.21	266.93	303.1	226.09	173.39	186.35	81.24	153.4	79.18	94.42	164.96	138.13	146.16	131.14	100.7	219.89	248.37	74.63	132.98	100.9	152.19	124	106.62	208.26	179.95	194.48	199.29	136.64	314.89	15257	ENSMUSG00000008730	Hipk1	homeodomain interacting protein kinase 1
Gprc5b	2.76	3.76	3.79	1.32	2.72	0	0	0	0	0.72	0.32	0.3	0	0	0	0	0	7.92	9.14	0	2.24	0	0	0.52	2.18	10.04	84.58	120.32	132.96	184.4	116.51	125.7	16.38	6.53	4.1	44.58	19.87	40.13	64297	ENSMUSG00000008734	Gprc5b	G protein-coupled receptor/ family C/ group 5/ member B
Man1a2	38.05	103.33	61.62	142.83	146.83	146.3	117.25	155.25	130.52	158.93	123.84	111.59	171.52	250.96	237.76	375.39	374.2	229.61	158.39	959.01	1103.95	428.24	479.02	443.52	565.33	417.74	218.91	60.16	91.47	106.72	116.51	79.69	196.56	170.9	178.89	154.71	157.75	173.16	17156	ENSMUSG00000008763	Man1a2	mannosidase/ alpha/ class 1A/ member 2
Acyp1	103.68	46.97	119.93	51.34	53.48	91.03	92.18	138.77	177.71	52.98	44.28	49.46	28.59	63.88	51.41	44.82	58.11	74.43	103.56	39.14	25.17	45.31	29.14	48	50.07	43.51	89.55	94.99	72.61	56.83	65.74	74.07	28.08	53.28	49.24	47.2	62.11	56.69	66204	ENSMUSG00000008822	Acyp1	acylphosphatase 1/ erythrocyte (common) type
Cldn13	0	1.25	0	0	0	0	28.02	20.82	15.06	0	0	0	0	0	0	0	0	0	0	0	0	3.65	0	0	0	0	0	0	0	0	0	0	0	0	0	0	0	0	57255	ENSMUSG00000008843	Cldn13	claudin 13
Cd163	17.1	24.42	33.66	196.81	77.95	81.28	1937.26	2587.23	3973.78	15.75	6.1	0.9	249.48	223.58	160.65	5.6	58.11	1027.72	441.66	47.53	11.46	2.19	10.93	12	18.14	26.78	8517.57	12826.4	10170	5323.52	7359.07	5912.49	3779.16	3527.09	4604.32	5501.42	7260.32	12381.9	93671	ENSMUSG00000008845	Cd163	CD163 antigen
Hdac5	861.42	805.35	1105.89	342.93	312.7	259.01	214.6	142.68	96.38	219.43	189.29	202.67	441.78	237.27	453.03	294.15	104.59	264.45	392.93	609.51	541.35	465.51	582.84	542.66	280.13	322.68	206.47	332.46	508.26	373.53	332.04	409.65	381.43	473.5	459.53	356.62	428.54	274.19	15184	ENSMUSG00000008855	Hdac5	histone deacetylase 5
Rala	1483.49	1132.25	1328.2	339.64	362.55	374.96	168.14	194.28	260.03	366.19	324.04	436.4	1083.66	1907.26	507.65	705.95	764.67	473.48	332.01	262.82	280.74	256.5	293.24	180.02	235.13	242.34	218.91	322.96	204.62	444.26	206.38	250.28	418.87	278.97	235.51	325.16	361.46	318.81	56044	ENSMUSG00000008859	Rala	v-ral simian leukemia viral oncogene A (ras related)
Vdac3	94.3	146.54	79.64	175.09	157.71	149.55	119.47	161.76	141.56	221.22	217.53	151.7	90.95	63.88	6.43	22.41	90.64	118.77	106.61	47.53	95.91	137.39	105.64	164.36	147.32	181.42	57.21	15.83	65.07	89.36	99.03	99.89	51.48	117.62	103.39	123.24	144.09	112.82	22335	ENSMUSG00000008892	Vdac3	voltage-dependent anion channel 3
Vps72	258.65	252.38	334.66	523.95	206.65	212.41	357.66	205.99	132.53	307.84	395.27	419.81	517.14	255.52	311.66	266.13	297.5	224.86	365.51	802.43	765.05	829.44	846.94	728.41	339.64	370.88	1007.48	148.81	355.5	219.76	287.94	434.35	210.6	328.73	311	294.56	424.81	303.94	21427	ENSMUSG00000008958	Vps72	vacuolar protein sorting 72
Gabpa	105.33	58.87	112.82	77.67	106.05	112.71	86.28	113.19	118.47	92.71	74.75	93.19	88.36	27.38	86.75	50.42	99.94	64.93	15.23	75.49	92.55	76.73	92.89	82.44	139.34	88.37	4.98	161.48	41.49	68.83	54.92	28.06	81.9	77.41	97.65	84.79	98.13	123.48	14390	ENSMUSG00000008976	Gabpa	GA repeat binding protein/ alpha
Bmp7	3.86	13.15	6.16	10.53	9.97	0	0	0	0	2.86	0.32	0.6	5.2	0	0	0	0	0	0	0	0	0	0	0	0	0	0	0	0	0	0	0	0	1.01	3.28	0	0	0	12162	ENSMUSG00000008999	Bmp7	bone morphogenetic protein 7
Dynll1	917.67	437.75	934.29	356.1	472.22	357.62	126.1	150.91	257.02	521.55	556.97	561.86	626.29	711.8	491.59	512.65	318.42	278.7	657.92	195.72	138.69	206.08	147.53	155.49	415.11	168.7	537.32	487.6	274.4	417.1	330.38	355.78	306.54	217.65	306.9	280.58	216.13	411.71	56455	ENSMUSG00000009013	Dynll1	dynein light chain LC8-type 1
Pdcl	33.64	48.22	54.51	65.82	66.16	50.93	31.71	28.19	32.13	67.65	66.09	50.67	33.78	187.08	80.32	0	83.67	23.75	3.05	25.16	33.28	49.69	36.43	46.96	71.12	59.58	2.49	31.66	3.77	47.68	28.29	8.98	7.02	40.21	61.54	46.33	16.15	114.78	67466	ENSMUSG00000009030	Pdcl	phosducin-like
Tmem184b	76.66	91.43	115.66	123.09	165.87	127.88	134.21	152.22	136.54	208.33	184.48	258.76	129.94	438.03	465.88	47.62	130.16	121.93	127.93	223.68	285.49	266	331.49	225.93	386.81	310.63	273.64	427.44	71.67	113.35	86.55	84.18	84.24	75.4	67.29	118	52.17	106.37	223693	ENSMUSG00000009035	Tmem184b	transmembrane protein 184b
Nf2	200.19	182.86	175.86	134.28	104.23	101.87	188.78	125.33	233.93	183.27	135.39	157.13	135.13	91.26	61.05	19.61	83.67	126.68	106.61	103.45	162.74	117.66	94.71	164.88	202.48	180.08	17.41	15.83	126.36	80.2	49.1	122.34	210.6	134.21	146.89	121.5	126.7	144.25	18016	ENSMUSG00000009073	Nf2	neurofibromin 2
Cabp7	0	0	0.47	0	0	0	0	0	0	0	0.32	0	0	0	0	0	0	0	0	0	0.28	0	0	0	1.45	0	0	0	0	0	0.83	3.37	0	0.5	0	0	0	0	192650	ENSMUSG00000009075	Cabp7	calcium binding protein 7
Zmat5	177.03	189.75	100.02	152.05	116.92	91.03	169.61	119.26	68.27	108.46	146.94	154.72	454.77	734.62	218.48	403.4	223.13	505.15	319.82	251.63	127.79	182.7	134.78	129.92	87.09	119.16	355.73	440.11	213.11	305.01	312.07	249.16	219.96	291.03	274.9	411.69	319.23	216.38	67178	ENSMUSG00000009076	Zmat5	zinc finger/ matrin type 5
Ewsr1	425.74	282.44	361.2	277.11	394.27	481.16	363.56	343.03	538.14	281	230.36	303.4	311.85	314.84	449.82	344.57	237.07	197.94	307.64	377.45	355.96	330.31	349.7	296.37	285.21	332.72	363.19	1016.36	546.92	404.16	302.92	258.14	437.59	314.16	261.77	341.76	281.97	260.16	14030	ENSMUSG00000009079	Ewsr1	Ewing sarcoma breakpoint region 1
Ap1b1	243.2	341.93	286.78	1377.66	1422.09	1107.54	410.75	391.6	221.88	265.96	320.51	322.1	228.69	127.76	337.36	333.36	158.05	362.63	1306.71	917.07	785.46	869.63	934.37	767.02	857.07	964.69	1208.98	2276.53	2465.87	1430.34	1889.08	1626.27	1329.14	1701.47	1613.28	1992.01	2383.67	1285.92	11764	ENSMUSG00000009090	Ap1b1	adaptor protein complex AP-1/ beta 1 subunit
Derl3	17.65	11.9	7.58	91.49	81.57	56.35	8.11	15.61	0	9.66	17.97	16.89	0	0	0	5.6	0	0	60.92	2.8	4.75	8.04	0	7.3	5.08	18.08	0	0	0	0	1.66	0	0	10.05	2.46	0	1.24	0.84	70377	ENSMUSG00000009092	Derl3	Der1-like domain family/ member 3
Gstt4	0	0	0	0	0	0	0	3.04	0	0	0	0	0	0	0	0	0	0	0	0	0	0	0	0	0.73	0	0	0	0	0	0	3.37	0	0	0	2.62	0	0	75886	ENSMUSG00000009093	Gstt4	glutathione S-transferase/ theta 4
Tbx1	9.38	1.25	0	0	0	0	0	0	0	0	0	0	0	0	0	0	0	0	0	2.8	0.84	0	0	0	0	0	0	0	0	0.32	0	0	0	0	0	0	0	0.28	21380	ENSMUSG00000009097	Tbx1	T-box 1
Gnat2	0	0	0	2.63	0	0	0	0	0	0	0	0	0	0	0	0	0	0	0	0	0.28	0	0	0	0	0	0	0	0	0	0	0	0	0	0	0	0	0	14686	ENSMUSG00000009108	Gnat2	guanine nucleotide binding protein/ alpha transducing 2
Bcl2l13	56.25	75.78	72.05	110.58	53.48	56.35	98.82	75.46	111.44	133.52	109.73	125.16	51.97	0	41.77	75.64	127.83	57.01	82.24	64.31	104.3	65.04	41.89	85.05	97.97	101.09	0	34.83	79.21	52.73	34.95	74.07	51.48	60.32	63.19	43.7	59.62	74.93	94044	ENSMUSG00000009112	Bcl2l13	BCL2-like 13 (apoptosis facilitator)
Spatc1l	0	0	0	0	0	0	2.95	1.73	0	0	0.64	0.6	0	0	0	0	0	0	0	0	0	0	0	0.52	2.18	0	0	0	0	0	0	0	0	0	0	0	0	2.81	76573	ENSMUSG00000009115	Spatc1l	spermatogenesis and centriole associated 1 like
Dqx1	1.1	3.13	4.27	7.9	9.06	7.59	9.59	7.37	10.04	2.15	0.96	1.21	0	0	9.64	0	0	0	3.05	19.57	20.69	11.69	1.82	7.3	8.71	5.36	0	0	2.83	4.74	1.66	0	7.02	3.02	3.28	2.62	11.18	5.05	93838	ENSMUSG00000009145	Dqx1	DEAQ RNA-dependent ATPase
Ccl8	0	8.14	0.47	3611.67	2409.13	7533.91	0.74	3.9	2.01	0.72	0	3.32	0	0	0	53.23	0	147.27	137.07	2.8	0.84	0	0	0	0	5.36	883.1	699.74	974.09	543.09	346.19	1294.06	175.5	63.84	68.11	166.95	84.47	529.86	20307	ENSMUSG00000009185	Ccl8	chemokine (C-C motif) ligand 8
Lnpk	34.74	51.98	34.6	26.33	26.28	8.67	14.01	16.48	8.03	14.32	16.04	17.79	12.99	0	80.32	5.6	4.65	31.67	24.37	30.76	17.06	17.54	12.75	14.61	23.95	12.72	0	0	10.37	23.05	24.13	15.71	16.38	17.09	22.98	39.33	28.57	33.96	69605	ENSMUSG00000009207	Lnpk	lunapark/ ER junction formation factor
Prr29	0	0	0	0	0	0	0	0	0	0	0	0	0	0	0	0	0	0	0	0	0	0	0	0	0	0	0	0	0	0	0	0	0	1.01	0	0	0	0	75573	ENSMUSG00000009210	Prr29	proline rich 29
Mymk	0	0	0	0.66	0	0	0.74	0	0	0	0	0	0	0	0	0	0	0	0	64.31	71.86	219.23	127.5	170.62	172	182.09	0	0	0	0.63	0	0	0	0	0	0	0	0.28	66139	ENSMUSG00000009214	Mymk	myomaker/ myoblast fusion factor
Fam163b	0	0	0	0	0	0	0	0	0	0	0	0	0	0	0	0	0	0	0	0	0	1.46	0	0	0	0	0	0	0	0	0	0	0	0	0	0	0	0	109349	ENSMUSG00000009216	Fam163b	family with sequence similarity 163/ member B
Trpm5	0	0	0	3.29	0.91	4.33	0	0	0	0	0	0	0	0	0	0	0	0	0	0	0	0	0	0	0	0	0	0	0	0	0	0	0	2.01	0.82	0	0	0	56843	ENSMUSG00000009246	Trpm5	transient receptor potential cation channel/ subfamily M/ member 5
Ascl2	3.31	0.63	1.9	16.46	3.63	7.59	0	0	1	0	0	1.51	0	0	0	0	16.27	0	0	0	7.27	21.92	1.82	10.96	37.74	0	0	0	0	7.26	0	3.37	25.74	5.53	1.64	18.36	3.73	4.77	17173	ENSMUSG00000009248	Ascl2	achaete-scute family bHLH transcription factor 2
Rarres2	0	0	0.47	38.84	73.42	54.19	0	2.17	0	1.07	1.93	0	0	0	0	0	37.19	9.5	12.18	0	0	0.73	0	0	0	0	0	0	2.83	3.47	14.98	0	0	10.05	5.74	9.61	23.6	18.24	71660	ENSMUSG00000009281	Rarres2	retinoic acid receptor responder (tazarotene induced) 2
Pttg1ip	191.36	308.11	330.87	242.23	215.72	215.66	386.42	621.87	360.43	506.87	503.71	374.88	587.31	323.96	732.56	526.66	369.55	443.39	335.05	301.96	411.6	563.43	519.09	517.61	716.28	609.21	723.89	810.56	464.88	691.49	624.98	594.84	491.41	296.56	351.21	361.87	475.74	403.01	108705	ENSMUSG00000009291	Pttg1ip	pituitary tumor-transforming 1 interacting protein
Trpm2	0.55	8.77	0	167.19	350.76	428.06	1743.31	2196.94	2526.03	19.33	12.19	9.65	0	0	340.58	308.15	278.91	101.35	137.07	304.76	165.54	381.47	375.2	187.84	369.39	361.51	44.78	37.99	34.89	7.58	36.62	26.94	105.3	72.38	96.01	47.2	60.86	54.45	28240	ENSMUSG00000009292	Trpm2	transient receptor potential cation channel/ subfamily M/ member 2
Ube2g2	268.57	288.7	526.16	154.68	306.35	164.72	193.21	327.85	187.75	158.93	268.54	279.88	335.23	86.69	183.14	134.47	137.13	194.78	277.18	137	127.23	152.73	169.39	176.89	333.1	321.34	241.3	120.32	262.15	207.13	329.55	288.44	376.75	127.17	86.98	225.51	142.85	193.09	22213	ENSMUSG00000009293	Ube2g2	ubiquitin-conjugating enzyme E2G 2
Mpo	0	0	0	0	1.81	0	0	0	0	0	0.96	1.51	2.6	0	0	0	0	0	0	0	0	0	0	0	0	0	0	0	0	0.32	0	0	0	0	5.74	0	0	0	17523	ENSMUSG00000009350	Mpo	myeloperoxidase
Lpo	0	3.76	2.37	53.97	17.22	45.52	0	0	0	0	0	0	0	0	0	0	0	0	0	0	0	0	0	0	0	0	0	0	0	0	0	0	0	0	0	0	0	0	76113	ENSMUSG00000009356	Lpo	lactoperoxidase
Met	0	0	0	17.77	12.69	10.84	0	0	0	0.72	0	1.21	0	0	0	0	0	0	0	5.59	0.28	1.46	1.82	0	0.73	0	0	0	2.83	0.32	0	0	0	1.51	0	0.87	0	0	17295	ENSMUSG00000009376	Met	met proto-oncogene
Slc16a12	0	0	0	0	0	0	0	0	8.03	0	0	0	0	0	0	0	0	0	0	0	0	0	0	0	0	0	0	0	0	0.63	1.66	0	0	0.5	0	0	0	2.25	240638	ENSMUSG00000009378	Slc16a12	solute carrier family 16 (monocarboxylic acid transporters)/ member 12
Syn2	0	0	0	6.58	0	0	0	0	0	2.15	0.96	1.51	0	0	0	0	0	0	0	0	0.28	2.19	5.46	0.52	0	0	0	0	0	0	0	0	0	2.01	0	0.87	0	0.28	20965	ENSMUSG00000009394	Syn2	synapsin II
Elk1	14.89	26.3	35.55	30.28	21.75	8.67	67.84	47.27	20.08	38.66	51.01	80.83	0	0	9.64	11.21	13.95	6.33	42.64	0	7.27	2.92	9.11	10.96	2.9	3.35	0	28.5	22.63	12	22.47	42.65	18.72	21.61	18.05	14.86	11.18	28.06	13712	ENSMUSG00000009406	Elk1	ELK1/ member of ETS oncogene family
Nav1	495.78	432.74	543.7	140.86	173.12	121.37	1414.41	984.85	1531.08	184.35	128.01	132.4	517.14	1049.45	141.37	120.46	95.29	161.52	225.4	287.98	384.48	212.66	203.99	219.15	211.91	147.28	1149.27	804.22	828.87	917.56	1064.37	1126.83	540.55	674.55	580.16	680.03	773.85	592.73	215690	ENSMUSG00000009418	Nav1	neuron navigator 1
Tnpo1	105.88	155.94	158.8	138.89	195.78	123.54	114.3	177.8	237.95	205.47	113.25	108.87	80.56	4.56	38.56	92.45	90.64	77.59	121.84	162.16	152.67	138.85	134.78	108.53	161.84	188.79	34.83	66.49	66.01	87.78	64.91	65.1	46.8	82.43	96.83	90.03	80.74	141.45	238799	ENSMUSG00000009470	Tnpo1	transportin 1
Myod1	0	0	0	0	0	0	0	0	0	0	0	0	0	0	0	0	0	0	0	0	0	0	0	0	0	0	0	0	0	0.32	0	0	0	0	0	0	0	0	17927	ENSMUSG00000009471	Myod1	myogenic differentiation 1
Otog	0	0	0	0	0	0	0	0	0	0	0	0.3	0	0	0	0	0	0	0	0	0	0	0	0	0	0	0	0	0	0	0	0	0	0	0	0	0	0	18419	ENSMUSG00000009487	Otog	otogelin
Rnmt	75.55	87.67	73.47	66.48	47.13	132.21	64.16	76.76	176.7	124.57	96.57	107.97	77.96	0	38.56	25.21	88.32	71.26	33.51	67.1	92	94.27	83.78	72.01	71.12	106.44	0	15.83	49.98	45.78	48.27	28.06	7.02	42.22	36.93	34.96	32.3	88.97	67897	ENSMUSG00000009535	Rnmt	RNA (guanine-7-) methyltransferase
Kcnq1	0	0	0	76.35	19.94	47.68	17.7	13.88	35.14	0	0	0	0	0	0	11.21	18.59	9.5	6.09	0	0	0	0	0	0	0.67	0	139.31	44.32	13.89	32.46	16.84	21.06	13.07	3.28	12.24	2.48	6.74	16535	ENSMUSG00000009545	Kcnq1	potassium voltage-gated channel/ subfamily Q/ member 1
Srp14	725.75	453.4	725.25	406.78	292.76	612.29	196.16	258.03	320.27	408.79	372.81	415.59	384.61	396.97	302.02	451.02	295.18	210.61	277.18	153.78	166.93	174.66	163.92	147.67	439.06	225.61	238.81	310.29	601.62	439.21	253.82	242.43	339.31	216.64	229.76	260.47	290.66	391.22	20813	ENSMUSG00000009549	Srp14	signal recognition particle 14
6330409D20Rik	0	0	0	0	0	0	0	0	0	0	0	0	0	0	0	0	0	0	0	0	0	0	9.11	0	0	0	0	0	0	0	0	0	0	0	0	0	0	0	70730	ENSMUSG00000009551	6330409D20Rik	RIKEN cDNA 6330409D20 gene
Cdk9	65.07	75.15	72.53	36.2	69.79	43.35	55.31	58.98	59.24	37.94	39.46	41.62	155.92	351.34	106.03	358.58	206.86	167.86	127.93	55.92	116.04	64.31	61.93	78.27	129.18	117.16	233.84	123.48	257.43	130.09	233.01	160.49	35.1	72.88	76.31	93.53	63.35	26.94	107951	ENSMUSG00000009555	Cdk9	cyclin-dependent kinase 9 (CDC2-related kinase)
Tor2a	264.16	196.64	226.58	184.96	219.34	225.41	190.26	180.84	112.45	203.32	259.88	253.03	200.1	146.01	112.45	98.05	67.4	126.68	216.26	164.96	228.73	276.24	304.17	266.11	301.17	284.52	171.64	72.82	106.56	159.77	111.51	138.05	210.6	132.2	132.94	123.24	206.2	126.01	30933	ENSMUSG00000009563	Tor2a	torsin family 2/ member A
Fpgs	18.2	6.89	9.01	24.35	12.69	8.67	27.29	15.18	6.02	24.7	33.69	39.51	15.59	22.81	12.85	14.01	32.54	15.84	3.05	69.9	45.02	43.85	41.89	44.87	53.7	30.8	0	37.99	16.97	27.79	7.49	13.47	32.76	14.07	18.87	24.47	16.15	19.93	14287	ENSMUSG00000009566	Fpgs	folylpolyglutamyl synthetase
Mrtfb	23.16	21.92	13.27	15.8	22.66	19.51	35.4	31.22	61.24	77.32	51.65	53.68	0	0	0	154.08	13.95	6.33	27.41	13.98	12.02	19.73	7.29	5.22	14.51	7.36	2.49	94.99	16.97	14.84	69.07	15.71	4.68	16.59	34.46	24.47	18.63	25.26	239719	ENSMUSG00000009569	Mrtfb	myocardin related transcription factor B
Cbx5	45.77	36.32	26.07	31.59	45.32	57.44	39.08	53.34	55.22	30.43	25.99	32.87	33.78	41.07	25.7	5.6	113.89	19	60.92	36.35	29.92	26.31	51	26.09	30.48	34.81	62.19	145.65	37.72	38.84	14.98	63.97	14.04	62.33	58.26	37.59	31.05	83.63	12419	ENSMUSG00000009575	Cbx5	chromobox 5
Odam	0	0	0	0	0	0	0	0	0	0	0	0	0	0	25.7	16.81	11.62	26.92	6.09	0	0	0	0	0	0	0	0	0	0	0.95	4.99	0	0	0	0	0	0	0	69592	ENSMUSG00000009580	Odam	odontogenic/ ameloblast asssociated
Apobec3	55.15	104.58	46.45	583.19	667.09	536.43	439.51	703.84	608.42	95.58	91.76	99.52	265.07	611.42	597.61	470.63	662.4	429.14	405.11	262.82	456.06	372.7	413.45	385.08	357.05	392.3	208.96	332.46	415.85	339.75	344.53	317.62	493.75	347.83	394.7	268.34	291.9	527.34	80287	ENSMUSG00000009585	Apobec3	apolipoprotein B mRNA editing enzyme/ catalytic polypeptide 3
St6galnac1	0	0	0	0	0	0	0	0	0	1.07	0	0	0	0	0	0	0	0	0	0	0	0	0	0	0	0	0	0	0	0	0	0	0	3.02	0	0	0	0	20445	ENSMUSG00000009588	St6galnac1	ST6 (alpha-N-acetyl-neuraminyl-2/3-beta-galactosyl-1/3)-N-acetylgalactosaminide alpha-2/6-sialyltransferase 1
Sardh	11.03	16.28	7.58	7.24	9.97	7.59	8.11	0	0	23.27	30.16	21.41	0	0	0	0	0	1.58	6.09	72.69	45.58	59.19	58.28	36.52	21.05	68.95	17.41	15.83	16.97	5.05	40.78	13.47	0	49.26	19.69	27.1	26.08	26.66	192166	ENSMUSG00000009614	Sardh	sarcosine dehydrogenase
Vav2	5.51	29.43	11.38	260	353.48	294.77	1392.29	902.89	909.61	245.2	369.6	364.92	44.18	9.13	366.28	198.9	306.8	134.6	249.77	405.41	371.34	336.89	431.67	382.47	288.11	373.56	151.74	101.32	188.59	155.66	96.53	121.21	91.26	124.15	122.27	76.92	65.83	75.77	22325	ENSMUSG00000009621	Vav2	vav 2 oncogene
Tex15	0	0.63	0	0	0	0	0	2.17	0	0	0	0	0	0	0	0	0	4.75	0	0	0	0	0	0	0	0	0	0	0	0	0	0	0	0	0	3.5	0	0	104271	ENSMUSG00000009628	Tex15	testis expressed gene 15
Ppp2cb	218.94	211.04	289.63	240.91	203.93	132.21	171.09	230.28	269.07	334.69	414.2	547.39	241.68	100.38	89.96	72.84	141.78	58.59	88.33	159.37	135.9	196.58	180.32	163.32	426.72	315.32	24.88	79.16	83.92	149.98	90.71	111.11	126.36	108.57	120.63	159.96	134.15	188.88	19053	ENSMUSG00000009630	Ppp2cb	protein phosphatase 2 (formerly 2A)/ catalytic subunit/ beta isoform
G0s2	0.55	1.25	0.47	7.9	11.78	3.25	1.47	3.9	1	124.21	137.64	125.46	41.58	95.82	9.64	16.81	18.59	4.75	0	2.8	3.36	2.92	1.82	7.83	7.98	4.69	201.5	25.33	8.49	26.84	0	1.12	28.08	11.56	13.13	43.7	3.73	1.4	14373	ENSMUSG00000009633	G0s2	G0/G1 switch gene 2
Dmap1	76.1	66.38	62.57	71.09	77.95	42.26	101.77	82.4	29.12	47.97	69.62	61.52	132.53	4.56	80.32	28.01	46.48	60.17	94.42	128.61	122.19	148.35	143.89	139.84	99.42	97.07	169.16	53.83	124.47	65.99	223.86	111.11	105.3	94	66.47	85.66	108.07	49.96	66233	ENSMUSG00000009640	Dmap1	DNA methyltransferase 1-associated protein 1
Pla2g12b	0	0	0	1.97	0	7.59	0	0	0	0.72	0	0	0	0	0	0	0	0	0	0	0	1.46	0	0	0	0	0	0	0	0	0	0	0	0	0	0	0	0	69836	ENSMUSG00000009646	Pla2g12b	phospholipase A2/ group XIIB
Mcu	13.79	6.89	7.58	60.56	55.29	19.51	15.49	29.06	24.1	6.09	2.89	10.25	7.8	0	12.85	8.4	9.3	14.25	54.83	8.39	20.97	32.89	20.04	21.39	29.03	20.08	39.8	31.66	46.21	21.79	16.64	50.51	16.38	18.1	21.34	34.96	13.66	38.17	215999	ENSMUSG00000009647	Mcu	mitochondrial calcium uniporter
Oit3	0	0	7.11	0	0	0	0.74	0	0	0.36	0	0	0	0	0	0	0	0	0	0	0	0	0	0	0	0	0	0	4.71	0	0	0	0	0	0	0	2.48	0	18302	ENSMUSG00000009654	Oit3	oncoprotein induced transcript 3
Tex11	0	0	0	0	0	0	0	0	0	0	0	0	0	0	0	0	0	0	0	0	0	3.65	0	1.04	0	0	0	0	0	0	0	0	0	0	0	0	0	0	83558	ENSMUSG00000009670	Tex11	testis expressed gene 11
Bcr	4.96	5.01	2.37	27.65	40.79	23.84	2.21	7.81	12.05	3.22	3.21	1.21	2.6	36.5	0	30.82	53.46	0	60.92	78.29	41.38	45.31	65.57	28.7	18.14	57.57	0	0	33	6	12.48	8.98	25.74	30.66	25.44	28.84	23.6	10.38	110279	ENSMUSG00000009681	Bcr	breakpoint cluster region
Fxyd5	6923.86	8199.44	6922.11	2365	1704.88	1299.36	1141.56	896.38	617.45	6538.48	8821.03	6555.38	10441.6	12128	3090.89	4157.25	4269.59	4243.89	8321.53	164.96	56.76	175.39	100.18	86.62	55.88	53.56	2470.19	1741.43	1642.66	1798.82	2200.32	2558.94	2885.26	4450.95	4189.11	3178.13	3728.91	2771.39	18301	ENSMUSG00000009687	Fxyd5	FXYD domain-containing ion transport regulator 5
Kcnd1	2.76	0.63	1.42	15.8	7.25	10.84	4.42	8.24	16.06	5.73	6.1	3.62	0	0	67.47	0	20.92	31.67	0	260.02	278.78	286.47	377.03	284.89	368.67	358.83	0	0	0	0.32	0	7.86	0	5.53	1.64	1.75	4.97	2.81	16506	ENSMUSG00000009731	Kcnd1	potassium voltage-gated channel/ Shal-related family/ member 1
Tfcp2	7.72	11.9	8.06	8.56	12.69	5.42	15.49	28.19	30.12	13.6	4.81	12.37	0	0	67.47	11.21	13.95	19	33.51	27.96	49.49	16.08	30.96	14.09	36.29	23.43	0	0	9.43	6.95	31.62	16.84	9.36	17.09	7.39	9.61	4.97	16.84	21422	ENSMUSG00000009733	Tfcp2	transcription factor CP2
Pou6f2	0	0	0	0.66	0	0	0	0	0	0	0	0	0	0	0	0	4.65	0	0	0	0	0	0	0	0	0	0	0	0	0	0	0	0	0	0.82	0	0	0	218030	ENSMUSG00000009734	Pou6f2	POU domain/ class 6/ transcription factor 2
Pou6f1	14.34	38.83	11.85	29.62	25.38	45.52	101.77	84.13	108.43	32.22	13.48	18.4	23.39	0	22.49	50.42	0	0	3.05	33.55	49.21	49.69	40.07	62.61	18.87	71.63	0	0	32.06	24	30.79	68.46	35.1	22.12	31.18	22.73	29.81	23.01	19009	ENSMUSG00000009739	Pou6f1	POU domain/ class 6/ transcription factor 1
Ubp1	324.82	264.28	405.29	147.44	103.33	185.31	166.66	177.37	196.78	256.3	211.43	271.73	267.67	250.96	115.67	89.64	197.56	88.68	15.23	237.65	247.47	118.39	116.57	173.75	233.68	236.32	59.7	196.31	134.84	171.45	117.34	93.15	142.74	163.36	144.42	148.59	160.24	229.01	22221	ENSMUSG00000009741	Ubp1	upstream binding protein 1
Nuak2	116.91	117.11	140.31	90.18	130.52	94.28	357.66	220.3	99.39	204.39	225.55	102.54	148.13	104.95	57.83	86.84	76.7	283.45	246.72	27.96	30.2	84.77	74.68	55.31	65.31	94.39	69.65	139.31	94.3	171.14	148.13	290.69	154.44	144.26	98.47	113.63	121.73	96.54	74137	ENSMUSG00000009772	Nuak2	NUAK family/ SNF1-like kinase/ 2
Ick	28.68	15.03	22.28	61.21	30.82	80.19	49.41	55.94	63.25	76.6	59.68	63.64	10.39	9.13	41.77	33.62	6.97	36.42	51.78	81.08	86.68	81.85	47.36	82.44	108.13	116.49	0	88.65	83.92	52.73	79.89	29.18	56.16	26.64	41.03	43.7	42.23	59.78	56542	ENSMUSG00000009828	Ick	intestinal cell kinase
Sdhb	1046.16	864.22	965.1	1076.85	970.72	1267.93	1090.67	952.76	764.03	982.96	1101.1	810.98	579.51	652.48	970.32	809.6	955.25	1048.3	1489.47	863.94	628.59	710.32	668.45	743.54	914.41	759.17	1422.91	677.58	970.32	827.26	1051.89	986.54	868.15	747.44	743.45	770.93	812.36	640.16	67680	ENSMUSG00000009863	Sdhb	succinate dehydrogenase complex/ subunit B/ iron sulfur (Ip)
Cox4i2	0	1.25	0.95	5.27	0	0	8.11	1.3	0	0.72	0.96	1.21	0	0	0	0	0	0	0	0	0	0.73	0	1.04	0	0	0	0	0	0	0	0	0	1.01	0	1.75	7.45	0.28	84682	ENSMUSG00000009876	Cox4i2	cytochrome c oxidase subunit 4I2
Snap47	261.4	190.38	229.9	49.37	60.73	28.18	73.74	78.06	80.32	39.73	59.68	42.83	311.85	31.94	141.37	151.27	39.51	49.09	12.18	81.08	71.3	102.31	72.86	101.75	154.58	136.57	0	25.33	67.89	34.42	87.38	88.66	72.54	42.73	31.18	29.72	53.41	29.19	67826	ENSMUSG00000009894	Snap47	synaptosomal-associated protein/ 47
Kdsr	18.75	43.84	18.96	44.76	15.41	31.43	48.67	45.53	38.15	63.36	57.11	40.11	7.8	4.56	0	5.6	37.19	34.84	9.14	95.06	62.91	55.54	98.35	67.83	66.77	53.56	12.44	120.32	54.69	61.26	34.95	31.43	46.8	43.23	31.18	77.79	39.75	49.96	70750	ENSMUSG00000009905	Kdsr	3-ketodihydrosphingosine reductase
Vps4b	147.25	163.45	125.14	146.78	174.02	132.21	117.25	196.45	152.61	154.64	128.33	124.86	129.94	86.69	102.82	168.08	146.43	201.11	70.06	226.47	157.15	149.81	112.93	108.53	200.3	200.84	44.78	12.66	37.72	185.98	128.99	85.3	142.74	125.16	174.79	199.29	161.48	172.88	20479	ENSMUSG00000009907	Vps4b	vacuolar protein sorting 4B
Rps25	2541.78	2487.45	2167.22	1702.17	886.43	1354.63	1123.86	540.78	901.58	1960.18	1840.31	2049.01	2383.02	1501.17	1500.46	2381.17	2882.03	1379.27	1745.33	768.88	1073.47	998.25	1127.43	1196.45	409.31	380.92	2718.95	1662.28	1025.95	863.57	991.14	787.88	1078.76	1345.59	1534.5	1162.52	1224.75	1535.98	75617	ENSMUSG00000009927	Rps25	ribosomal protein S25
Nxf2	0	0	0	1.32	0	0	0	0	0	0.72	0	0.9	0	0	0	0	0	0	0	0	0	0	0	0	0	0	0	0	0	2.53	0	0	0	0	0	0	0	0	83454	ENSMUSG00000009941	Nxf2	nuclear RNA export factor 2
Taz	193.57	205.41	267.35	196.81	122.36	182.06	393.79	241.98	192.77	215.85	223.3	207.49	181.91	237.27	77.11	61.63	86	118.77	39.6	142.59	361.55	409.97	402.52	377.25	331.65	384.27	82.09	199.47	124.47	92.51	91.54	106.62	159.12	50.77	96.01	61.19	59.62	179.61	66826	ENSMUSG00000009995	Taz	tafazzin
Kif19a	0	0	0	1.97	4.53	17.34	2.95	6.94	18.07	0.36	0.32	0.3	0	0	12.85	8.4	0	11.08	36.55	2.8	0.56	0	5.46	1.04	5.08	0.67	0	34.83	18.86	9.16	14.15	20.2	9.36	0.5	1.64	4.37	4.97	4.49	286942	ENSMUSG00000010021	Kif19a	kinesin family member 19A
Aldh3a2	184.2	137.15	255.5	183.64	98.79	178.81	103.24	141.37	144.57	220.86	182.55	276.56	197.5	255.52	19.28	98.05	162.7	131.43	109.65	100.65	150.16	151.27	149.35	133.06	293.19	180.75	84.58	294.46	159.36	111.14	153.12	95.4	107.64	96.51	85.34	113.63	119.25	113.38	11671	ENSMUSG00000010025	Aldh3a2	aldehyde dehydrogenase family 3/ subfamily A2
Zmynd10	9.93	6.26	5.21	0	0	0	0	0	0	3.22	2.25	2.41	0	31.94	0	0	0	14.25	0	0	1.4	2.19	0	3.65	2.9	0	0	0	0	2.21	1.66	13.47	0	2.01	2.46	0	1.24	0.28	114602	ENSMUSG00000010044	Zmynd10	zinc finger/ MYND domain containing 10
Tmem115	77.21	101.45	78.21	123.09	87.01	67.19	160.76	113.62	58.23	103.09	124.8	116.41	109.15	36.5	102.82	64.43	27.89	52.26	127.93	371.86	196.01	282.08	238.6	213.93	135.71	201.51	27.36	47.49	162.19	115.56	117.34	109.99	53.82	108.57	148.53	126.74	161.48	96.26	56395	ENSMUSG00000010045	Tmem115	transmembrane protein 115
Hyal2	17.65	45.09	18.96	59.9	55.29	21.67	94.39	123.16	95.38	39.38	53.9	54.59	10.39	0	41.77	5.6	20.92	30.09	21.32	64.31	76.9	103.04	112.93	87.14	102.33	149.96	184.08	123.48	95.24	147.77	252.99	109.99	238.68	68.86	43.49	128.49	108.07	131.9	15587	ENSMUSG00000010047	Hyal2	hyaluronoglucosaminidase 2
Ifrd2	31.99	27.55	14.69	24.35	19.03	37.93	85.54	51.61	64.26	24.34	23.1	31.97	0	0	41.77	56.03	23.24	42.76	45.69	16.78	28.52	14.62	23.68	33.92	21.77	26.78	0	25.33	33	37.26	49.93	10.1	2.34	19.6	22.98	21.85	31.05	11.51	15983	ENSMUSG00000010048	Ifrd2	interferon-related developmental regulator 2
Hyal1	89.89	67.01	110.92	43.44	31.72	52.02	81.86	77.63	72.29	9.31	15.4	11.46	18.19	0	16.06	14.01	20.92	30.09	15.23	123.02	167.21	169.54	125.68	101.75	89.26	95.06	303.49	155.15	107.5	131.67	202.22	188.55	18.72	47.25	33.64	90.9	68.32	62.58	15586	ENSMUSG00000010051	Hyal1	hyaluronoglucosaminidase 1
Tusc2	47.98	123.37	68.73	107.29	106.95	61.77	132	166.96	148.59	85.19	109.4	112.19	80.56	31.94	6.43	39.22	18.59	57.01	100.52	55.92	86.12	119.85	176.67	105.4	66.77	115.15	159.21	291.29	108.44	104.51	66.58	102.13	107.64	92.49	119.81	167.82	154.03	151.27	80385	ENSMUSG00000010054	Tusc2	tumor suppressor 2/ mitochondrial calcium regulator
Nprl2	125.74	60.12	74.42	61.21	38.97	75.86	73.01	74.16	92.37	35.8	78.28	57	12.99	22.81	112.45	47.62	6.97	17.42	45.69	25.16	62.36	74.54	81.96	105.4	136.44	117.83	27.36	126.65	69.78	77.04	60.75	86.42	37.44	69.87	49.24	64.68	49.69	60.34	56032	ENSMUSG00000010057	Nprl2	NPR2 like/ GATOR1 complex subunit
Slc38a3	7.17	10.02	10.43	0	0	0	0	0	0	0	0	0	0	0	0	0	0	0	0	0	2.52	1.46	0	0	2.18	0	0	0	0	0	0	0	0	0.5	1.64	0	0	0	76257	ENSMUSG00000010064	Slc38a3	solute carrier family 38/ member 3
Cacna2d2	0	0	0	5.27	0	3.25	0	0	0	0	0	0	0	0	0	0	0	0	0	0	0	0	0	0	0	0	0	0	0	0	0	0	0	1.01	0	0	0	0	56808	ENSMUSG00000010066	Cacna2d2	calcium channel/ voltage-dependent/ alpha 2/delta subunit 2
Rassf1	818.4	539.82	1065.6	299.49	404.24	476.83	131.26	193.41	289.15	510.81	644.88	771.47	285.86	136.88	170.29	372.58	255.66	304.04	365.51	125.82	168.05	133	125.68	186.28	214.81	157.99	174.13	763.06	365.87	460.99	382.81	484.85	629.47	278.47	307.72	252.61	283.21	351.09	56289	ENSMUSG00000010067	Rassf1	Ras association (RalGDS/AF-6) domain family member 1
Epn3	25.92	11.27	6.64	28.3	5.44	8.67	0	0	0	0	0	0	0	0	0	0	34.86	0	0	0	0	0.73	0	1.04	0	0	0	0	0	0.95	0	0	0	0	0	0	0	0	71889	ENSMUSG00000010080	Epn3	epsin 3
Rnf112	0	0	0	0	1.81	0	0	0	0	0	0	0	0	0	0	0	0	0	3.05	0	0	5.12	0	0	0	0	0	0	0	0	0	0	0	0	0	0	0	0	22671	ENSMUSG00000010086	Rnf112	ring finger protein 112
Slc3a2	4124.54	2590.15	5554.57	1267.74	1884.34	2174.99	2055.25	2179.59	1966.81	1717.85	2076.76	2567.14	1283.76	374.15	1940.64	1927.35	1299.24	1328.59	1516.88	1196.66	1576.23	2065.19	2233.01	2000.52	3112.61	2878.01	1059.72	1282.33	1708.66	1419.92	1144.26	1631.88	2758.9	959.05	832.08	1221.08	941.54	1283.4	17254	ENSMUSG00000010095	Slc3a2	solute carrier family 3 (activators of dibasic and neutral amino acid transport)/ member 2
Nxf1	818.95	760.26	705.34	449.57	358.92	561.36	747.03	575.9	861.42	367.98	448.53	430.97	389.81	150.57	163.86	226.91	218.48	205.86	545.22	402.62	428.1	426.78	431.67	531.18	624.84	596.49	261.2	237.47	412.08	299.33	510.97	314.26	273.78	270.93	292.95	187.05	255.88	259.88	53319	ENSMUSG00000010097	Nxf1	nuclear RNA export factor 1
Stx5a	496.33	500.37	681.64	360.05	338.08	261.17	533.91	532.97	379.51	257.73	434.41	270.23	501.55	488.22	308.45	254.93	267.29	327.79	341.15	514.45	486.54	548.82	550.06	517.09	791.76	767.87	313.44	256.47	456.4	358.69	624.14	386.09	472.69	471.48	404.55	370.61	421.09	288.22	56389	ENSMUSG00000010110	Stx5a	syntaxin 5A
Slc47a1	0.55	0	4.27	3.29	4.53	0	0	0	0	0	0.64	0	0	0	0	0	0	0	0	0	0	0	0	0	0	0	0	0	0	0	0	0	0	0	0	0	0	2.81	67473	ENSMUSG00000010122	Slc47a1	solute carrier family 47/ member 1
Tnfrsf13b	108.09	78.28	81.06	72.4	125.08	248.17	7.37	4.77	13.05	50.47	40.43	32.27	101.35	63.88	147.8	291.34	127.83	210.61	82.24	466.92	417.2	241.89	344.24	325.59	437.61	411.72	161.69	110.82	164.08	140.82	93.21	139.17	196.56	133.2	95.19	87.41	65.83	172.6	57916	ENSMUSG00000010142	Tnfrsf13b	tumor necrosis factor receptor superfamily/ member 13b
Spire2	0	0	0	5.27	0	8.67	0	0.43	4.02	0	0	0	0	0	0	0	0	0	0	0	0	0	0	0.52	0	0	0	0	0	0	0	0	0	0	0	0	0	0	234857	ENSMUSG00000010154	Spire2	spire type actin nucleation factor 2
Prox1	0	0.63	0	0	0	0	5.16	0	0	1.07	1.93	0.6	0	0	0	0	0	0	0	5.59	15.94	3.65	12.75	3.13	6.53	0	0	0	0	0	0	0	16.38	0	0	0	1.24	0	19130	ENSMUSG00000010175	Prox1	prospero homeobox 1
Raver1	29.23	35.07	38.4	36.2	18.13	6.5	49.41	19.08	9.04	18.61	18.61	20.81	72.76	0	44.98	58.83	32.54	22.17	18.28	36.35	49.77	35.08	27.32	34.96	44.27	36.15	32.34	50.66	58.46	29.68	19.14	25.81	30.42	18.1	15.59	25.35	9.94	10.66	71766	ENSMUSG00000010205	Raver1	ribonucleoprotein/ PTB-binding 1
2610507B11Rik	260.85	160.95	173.97	238.94	584.61	562.44	300.14	460.98	549.18	182.56	147.9	129.68	135.13	136.88	404.84	428.61	539.22	380.05	426.43	234.86	349.53	160.04	176.67	164.88	312.78	226.95	691.55	721.9	702.51	533.61	598.35	518.52	517.15	612.73	585.08	743.84	675.73	582.06	72503	ENSMUSG00000010277	2610507B11Rik	RIKEN cDNA 2610507B11 gene
AI597479	46.88	60.75	41.71	34.23	9.97	21.67	33.92	29.06	65.26	35.44	28.55	35.89	2.6	41.07	32.13	14.01	6.97	1.58	12.18	22.37	21.81	25.58	10.93	28.7	22.5	20.75	0	0	24.52	13.89	5.83	13.47	4.68	11.06	2.46	16.61	6.21	43.78	98404	ENSMUSG00000010290	AI597479	expressed sequence AI597479
Tmem86a	20.4	43.84	63.52	1208.5	2069.24	1764.27	1699.8	1399.43	861.42	616.05	590.66	660.48	361.22	177.95	1619.34	1100.94	1090.06	1108.48	1023.44	2393.32	2624.53	2834.71	2925.13	2809.29	2604.6	2365.87	437.82	348.29	402.65	539.3	375.32	332.21	355.69	405.64	356.96	316.41	346.56	402.45	67893	ENSMUSG00000010307	Tmem86a	transmembrane protein 86A
Optc	0	0	0	0	0	2.17	0	0	0	0	0	0	0	0	0	0	0	0	0	0	0	0	0	0	0	0	0	0	0	0	0	0	0	0	0	0	0	0	269120	ENSMUSG00000010311	Optc	opticin
Tex14	2.21	0	0.95	3.95	6.34	11.92	1.47	3.9	11.04	1.79	0.32	3.32	0	0	0	0	0	3.17	0	0	1.4	0	0	1.04	0	0	0	0	0.94	2.84	3.33	19.08	4.68	1.01	0.82	0.87	3.73	0.84	83560	ENSMUSG00000010342	Tex14	testis expressed gene 14
Ifi35	128.5	225.45	161.17	268.56	338.98	197.23	550.87	446.24	263.04	180.77	238.38	198.75	384.61	501.91	764.69	383.79	562.46	367.38	557.41	385.84	241.03	342.74	315.1	317.25	274.32	257.74	298.51	72.82	296.09	270.91	371.99	258.14	479.71	502.65	362.7	488.61	472.01	233.22	70110	ENSMUSG00000010358	Ifi35	interferon-induced protein 35
Rdm1	61.77	68.89	42.66	99.39	67.07	60.69	106.93	96.71	48.19	105.6	144.38	106.76	145.53	9.13	289.17	72.84	46.48	88.68	207.12	106.25	91.16	200.97	163.92	98.62	113.94	134.56	44.78	56.99	129.19	174.29	150.63	184.06	77.22	161.85	143.6	195.79	252.15	126.57	66599	ENSMUSG00000010362	Rdm1	RAD52 motif 1
Nedd8	878.51	605.58	815.31	672.05	592.76	581.95	532.43	399.84	358.42	628.58	895.77	805.55	1112.25	720.93	587.98	1137.36	811.15	547.91	758.44	287.98	432.58	578.78	564.63	443.52	389.71	271.8	1340.82	934.04	924.11	524.14	575.04	466.89	517.15	690.14	683.55	866.21	862.05	946.06	18002	ENSMUSG00000010376	Nedd8	neural precursor cell expressed/ developmentally down-regulated gene 8
Gosr1	85.48	71.39	127.51	42.13	71.6	70.44	101.77	126.63	138.55	78.39	67.38	71.18	10.39	27.38	32.13	64.43	60.43	7.92	39.6	27.96	38.03	22.65	32.78	57.4	72.57	68.95	42.29	9.5	23.57	35.68	31.62	19.08	35.1	29.66	36.93	41.08	26.08	53.32	53334	ENSMUSG00000010392	Gosr1	golgi SNAP receptor complex member 1
Mrpl52	1646.18	1063.99	1724.96	878.73	1224.5	1198.58	544.23	510.86	639.54	490.05	478.69	519.64	3027.5	1966.58	2319.77	1325.05	1308.54	2183.7	2744.4	1453.89	761.13	1223.33	1129.25	1039.92	714.83	603.85	694.04	810.56	739.29	864.83	1172.56	1057.24	1123.22	883.66	1042.97	1006.93	765.16	617.7	68836	ENSMUSG00000010406	Mrpl52	mitochondrial ribosomal protein L52
Kansl3	324.27	378.88	423.77	118.48	170.4	217.82	151.18	232.44	374.49	95.58	96.57	108.57	317.04	273.77	234.55	207.3	192.91	101.35	213.22	109.04	145.96	116.19	149.35	128.36	424.55	262.43	223.88	123.48	229.14	207.13	98.2	233.45	175.5	143.25	141.14	149.47	122.97	206.56	226976	ENSMUSG00000010453	Kansl3	KAT8 regulatory NSL complex subunit 3
Eya4	0	0.63	0	4.61	0	4.33	0	0	0	0	0	0	0	0	12.85	19.61	23.24	0	0	22.37	37.75	16.81	16.39	13.04	0	3.35	0	0	0	4.42	0	0	0	1.51	0	4.37	0	1.96	14051	ENSMUSG00000010461	Eya4	EYA transcriptional coactivator and phosphatase 4
Ebf3	0	0	0	0	0.91	0	0	0	1	0.36	0.32	0	0	0	0	0	13.95	0	0	53.12	75.78	90.62	76.5	96.01	92.17	83.01	0	0	0	0	0	0	0	0	0	0	0	0	13593	ENSMUSG00000010476	Ebf3	early B cell factor 3
Uckl1os	0	0	0	0	0	0	0	0	0	0.36	0	2.41	0	0	0	0	0	0	0	0	0.56	0	0	0	0	0	7.46	0	0	0.95	48.27	0	0	0	0.82	0	0	0	100271841	ENSMUSG00000010492	Uckl1os	uridine-cytidine kinase 1-like 1/ opposite strand
Faf1	184.2	174.1	108.08	147.44	111.48	98.62	112.83	93.24	94.37	131.01	136.35	139.33	244.28	173.39	273.1	162.48	86	145.69	82.24	81.08	105.14	117.66	123.85	135.66	78.38	117.83	149.26	34.83	203.68	82.41	109.02	101.01	201.24	136.22	121.45	138.1	110.55	165.3	14084	ENSMUSG00000010517	Faf1	Fas-associated factor 1
Gm266	0	0	0	0	0	0	0	0	2.01	0	0	0.9	0	0	0	0	0	0	0	0	0	0	0	0	0	0	0	0	0	0.32	0	8.98	0	0	0	0	0	0	212539	ENSMUSG00000010529	Gm266	predicted gene 266
Tsacc	29.23	13.78	36.03	5.92	12.69	5.42	6.64	7.37	10.04	8.59	7.06	11.16	54.57	18.25	0	0	6.97	6.33	0	8.39	21.81	31.42	25.5	29.22	20.32	14.06	69.65	44.33	13.2	10.74	8.32	11.22	46.8	4.02	19.69	2.62	7.45	22.17	76927	ENSMUSG00000010538	Tsacc	TSSK6 activating co-chaperone
Mettl16	52.39	35.7	56.88	45.42	60.73	62.85	49.41	52.04	69.28	28.64	42.99	50.06	158.52	82.13	61.05	117.66	11.62	66.51	54.83	83.88	60.96	62.85	69.21	44.87	84.18	68.28	119.41	151.98	61.29	52.1	54.09	121.21	46.8	57.8	63.19	77.79	33.54	40.69	67493	ENSMUSG00000010554	Mettl16	methyltransferase like 16
Dazl	0	0	0	0	0	0	0.74	0.43	0	0.36	0.32	0	0	0	0	0	0	0	0	5.59	0	1.46	0	0.52	0	0	0	0	0	0.95	0	0	0	0	0	0	0	0	13164	ENSMUSG00000010592	Dazl	deleted in azoospermia-like
Apol7a	4.96	0	0	10.53	0.91	8.67	0	0	0	0	0	0	0	0	0	0	0	0	0	0	0	0	0	0	0	0	0	0	0	0	0	0	0	0	0	0	0	0	75761	ENSMUSG00000010601	Apol7a	apolipoprotein L 7a
Pigyl	50.18	68.89	36.5	136.91	148.64	137.63	163.71	155.25	57.23	75.53	179.03	112.79	153.32	18.25	86.75	86.84	53.46	120.35	261.95	170.55	147.08	191.46	198.53	134.62	135.71	171.38	213.93	82.32	162.19	125.35	198.89	208.76	112.32	124.15	109.96	194.04	139.12	95.7	66268	ENSMUSG00000010607	Pigyl	phosphatidylinositol glycan anchor biosynthesis/ class Y-like
Rbm25	979.43	1038.94	1067.97	670.07	573.73	667.56	885.67	876.43	985.92	743.48	469.7	519.04	1374.72	4553.7	2094.87	2000.19	2089.47	1363.43	712.75	2617	2829.49	1260.6	885.19	964.26	603.07	556.32	4607.05	3460.7	1143.82	1120.27	1390.59	1127.95	1174.7	1709.01	1943.15	1963.17	1577.52	944.1	67039	ENSMUSG00000010608	Rbm25	RNA binding motif protein 25
Psen2	58.46	112.72	83.43	209.97	193.96	206.99	335.54	417.62	448.78	560.21	585.2	570.01	114.34	374.15	568.7	837.61	755.37	475.06	667.06	142.59	112.69	104.5	147.53	98.62	74.02	92.39	298.51	155.15	191.42	222.92	197.23	134.68	138.06	111.09	145.24	125.87	90.68	78.3	19165	ENSMUSG00000010609	Psen2	presenilin 2
Acaa1b	5.51	1.25	7.58	11.85	0.91	14.09	13.27	1.3	17.07	961.48	2064.89	2728.49	2.6	9.13	9.64	0	0	4.75	0	0	1.12	2.19	0	8.35	5.08	1.34	0	0	6.6	0.95	6.66	2.24	0	2.01	0.82	0.87	0	0	235674	ENSMUSG00000010651	Acaa1b	acetyl-Coenzyme A acyltransferase 1B
Plcd1	9.93	15.66	15.64	44.1	55.29	58.52	44.25	29.06	19.08	34.72	37.54	42.22	2.6	0	3.21	0	0	12.67	48.74	109.04	96.75	135.19	167.57	132.53	217.72	151.97	84.58	0	43.38	50.2	82.39	81.93	60.84	27.65	22.98	20.98	48.44	39.01	18799	ENSMUSG00000010660	Plcd1	phospholipase C/ delta 1
Fads1	547.07	641.9	937.14	350.17	384.3	626.38	297.19	264.53	396.58	22.91	18.61	29.86	1018.7	296.58	343.79	288.54	227.77	266.04	325.92	137	227.33	350.78	530.02	285.42	500.75	581.76	398.02	269.13	244.23	231.44	230.52	215.49	231.66	279.47	289.67	200.16	259.61	444.26	76267	ENSMUSG00000010663	Fads1	fatty acid desaturase 1
Lmbr1	54.05	29.43	17.06	15.14	14.5	24.93	12.54	18.21	46.18	25.77	22.46	27.14	0	0	0	2.8	9.3	6.33	0	2.8	11.46	11.69	10.93	18.78	17.42	12.72	0	0	19.8	22.73	5.83	11.22	30.42	13.07	0.82	6.99	14.91	16.84	56873	ENSMUSG00000010721	Lmbr1	limb region 1
Tnfrsf22	6.62	17.53	7.58	0.66	0	1.08	0	0	0	9.31	8.66	3.92	0	0	0	0	0	6.33	0	2.8	0	2.19	0	2.61	0.73	11.38	0	22.16	0	1.89	0	6.73	4.68	1.51	3.28	1.75	2.48	5.33	79202	ENSMUSG00000010751	Tnfrsf22	tumor necrosis factor receptor superfamily/ member 22
Cars	84.93	206.03	117.56	92.81	81.57	43.35	52.36	85.43	40.16	80.9	86.95	93.49	51.97	269.21	89.96	70.03	67.4	112.43	106.61	120.23	167.77	133	132.96	224.89	107.41	161.34	72.14	101.32	143.33	75.78	133.98	63.97	46.8	87.46	83.7	90.03	127.94	35.36	27267	ENSMUSG00000010755	Cars	cysteinyl-tRNA synthetase
Phlda2	0	0	0	0.66	0	5.42	0	0	0	0	0	0.6	0	0	0	0	0	0	0	0	0	0	0	0	0	0	0	0	0	0	0	0	0	0	0	0	0	0	22113	ENSMUSG00000010760	Phlda2	pleckstrin homology like domain/ family A/ member 2
Wnt2	0	0	0	0	0	0	0	0	0	0	0	0	0	0	0	0	0	0	0	0	0	0	0	0	0	0	0	0	0	0	0	0	0	0.5	0	0	0	0.28	22413	ENSMUSG00000010797	Wnt2	wingless-type MMTV integration site family/ member 2
Gabra1	0	0	0	0	0	0	0	0	0	0	0	0	0	0	0	0	0	0	0	0	0	0	0	0	0	0	0	0	0	0	0	0	0	0.5	0	0	0	0	14394	ENSMUSG00000010803	Gabra1	gamma-aminobutyric acid (GABA) A receptor/ subunit alpha 1
Kdelr3	24.27	20.67	46.45	17.77	0	46.6	0	0	0	0	0.32	0.9	0	0	0	0	0	0	0	0	1.68	0	0	0	0	0	0	0	7.54	0	0	3.37	21.06	1.01	0.82	0	0	2.25	105785	ENSMUSG00000010830	Kdelr3	KDEL (Lys-Asp-Glu-Leu) endoplasmic reticulum protein retention receptor 3
Apip	122.43	102.08	99.07	100.71	77.95	109.45	71.53	64.62	81.32	91.28	78.93	78.41	80.56	100.38	93.18	100.85	86	88.68	137.07	95.06	71.3	70.89	56.46	56.87	85.63	79.67	109.45	53.83	107.5	148.72	131.49	70.71	105.3	94.5	64.01	104.01	139.12	123.2	56369	ENSMUSG00000010911	Apip	APAF1 interacting protein
Pdhx	63.97	59.49	99.07	75.7	40.79	59.6	61.21	68.95	49.2	84.84	55.5	37.4	23.39	0	54.62	39.22	37.19	34.84	48.74	47.53	80.81	62.12	76.5	84.53	127	96.4	19.9	37.99	74.49	63.15	74.07	49.38	28.08	41.72	68.11	40.21	28.57	44.62	27402	ENSMUSG00000010914	Pdhx	pyruvate dehydrogenase complex/ component X
Vac14	182.54	204.78	249.33	275.8	274.63	177.73	460.16	314.41	280.11	277.06	269.82	375.78	358.62	219.02	228.12	142.87	111.56	118.77	304.59	265.61	236.28	219.97	233.14	194.63	137.89	135.9	422.89	243.8	281.95	249.44	244.66	203.14	215.28	237.75	267.51	286.7	284.45	225.08	234729	ENSMUSG00000010936	Vac14	Vac14 homolog (S, cerevisiae)
Mcoln2	85.48	103.96	65.41	32.25	10.88	48.77	123.15	72.42	41.16	30.78	13.15	16.59	20.79	0	6.43	0	30.21	26.92	0	5.59	0	0	0	2.09	0	1.34	59.7	91.82	52.81	74.83	64.08	29.18	9.36	3.02	0	9.61	7.45	7.02	68279	ENSMUSG00000011008	Mcoln2	mucolipin 2
Slc5a1	29.23	2.5	0	41.47	17.22	24.93	0	0	0	0	0	0	0	0	0	0	0	0	0	0	0	0.73	0	0	0	0	0	0	0	0	0	0	0	0	0	0	0	0	20537	ENSMUSG00000011034	Slc5a1	solute carrier family 5 (sodium/glucose cotransporter)/ member 1
Akt1s1	105.33	67.63	73.95	156	119.64	114.87	179.94	166.53	146.58	128.87	166.51	185.48	127.34	100.38	163.86	92.45	146.43	150.44	94.42	106.25	168.89	214.85	183.96	260.89	150.22	176.07	69.65	183.64	211.23	199.87	211.38	285.07	170.82	98.02	97.65	145.1	163.96	130.22	67605	ENSMUSG00000011096	Akt1s1	AKT1 substrate 1 (proline-rich)
Tbrg1	472.07	460.92	575.93	163.24	161.33	209.15	138.64	128.8	100.4	246.28	221.38	188.19	717.24	296.58	311.66	274.54	376.52	353.13	304.59	128.61	159.94	126.43	103.82	96.01	154.58	101.76	111.94	189.97	173.51	396.9	362.84	215.49	212.94	252.33	214.17	186.18	135.39	118.99	21376	ENSMUSG00000011114	Tbrg1	transforming growth factor beta regulated gene 1
Panx3	1.1	0	0	0	0	0	0	0	0	0	0	0	0	0	0	0	0	0	0	0	0.28	0	0	0	0	0	0	0	0	0	0	0	0	0	0	0	0	0	208098	ENSMUSG00000011118	Panx3	pannexin 3
Adssl1	349.64	310.62	489.19	49.37	93.36	47.68	137.9	263.23	243.97	29.35	40.1	37.1	145.53	86.69	86.75	86.84	53.46	126.68	109.65	47.53	62.36	54.81	49.18	76.18	83.46	70.29	32.34	319.79	135.79	136.4	44.94	78.56	222.3	101.03	86.16	110.13	83.22	63.99	11565	ENSMUSG00000011148	Adssl1	adenylosuccinate synthetase like 1
Cfap161	0	0	1.9	0.66	0	0	0	0	0	3.58	1.28	3.32	0	22.81	0	14.01	0	0	0	0	0	0	0	0	0	0	0	0	0	0	0	0	0	0.5	0	0	0	0.28	75556	ENSMUSG00000011154	Cfap161	cilia and flagella associated protein 161
Brf1	181.44	154.06	182.97	101.37	146.83	127.88	152.65	110.15	133.53	72.31	77.96	90.48	83.16	95.82	122.09	98.05	90.64	155.19	176.66	285.19	250.54	165.89	187.6	207.67	230.05	251.05	104.48	132.98	248	241.86	116.51	187.43	105.3	136.72	118.16	137.23	104.34	74.09	72308	ENSMUSG00000011158	Brf1	BRF1/ RNA polymerase III transcription initiation factor 90 kDa subunit
Vipr2	0	0	0	1.32	0	5.42	0	0	0	0.36	0	0	0	0	0	0	0	0	0	0	0	0	0	0	0	0	0	0	0	0	0	0	0	0	0	0	0	0	22355	ENSMUSG00000011171	Vipr2	vasoactive intestinal peptide receptor 2
Odc1	22.61	7.51	17.54	49.37	75.23	57.44	18.44	23.42	8.03	21.84	42.03	36.79	31.18	13.69	6.43	58.83	20.92	36.42	24.37	61.51	11.18	19	23.68	9.91	14.51	0.67	0	34.83	50.92	46.73	26.63	3.37	39.78	49.76	45.13	62.06	26.08	42.38	18263	ENSMUSG00000011179	Odc1	ornithine decarboxylase/ structural 1
Thg1l	16.54	12.52	14.22	11.19	6.34	23.84	5.16	1.73	3.01	10.38	13.15	11.46	0	4.56	44.98	0	6.97	14.25	0	0	10.63	13.88	3.64	12	13.06	4.02	2.49	0	3.77	6	5.83	12.35	0	14.58	9.85	1.75	7.45	7.86	66628	ENSMUSG00000011254	Thg1l	tRNA-histidine guanylyltransferase 1-like (S, cerevisiae)
Adam19	45.77	61.37	81.53	190.88	197.59	180.98	0.74	0.43	0	1.79	0.64	2.71	127.34	187.08	67.47	137.27	72.05	107.68	100.52	0	0.28	0	0	0	0	1.34	159.21	15.83	250.83	145.24	187.24	142.54	138.06	176.93	150.17	90.03	132.91	146.22	11492	ENSMUSG00000011256	Adam19	a disintegrin and metallopeptidase domain 19 (meltrin beta)
Pabpc4	49.08	29.43	26.55	41.47	35.35	62.85	70.79	57.24	29.12	66.58	68.98	73.29	38.98	118.63	61.05	61.63	51.13	61.76	27.41	162.16	89.2	122.77	63.75	111.66	66.04	77.66	0	50.66	16.03	29.05	22.47	24.69	18.72	52.78	59.08	35.84	45.96	34.52	230721	ENSMUSG00000011257	Pabpc4	poly(A) binding protein/ cytoplasmic 4
Exoc3l2	1.1	0	0.47	5.27	0	0	12.54	3.9	8.03	0	0	0	0	0	0	0	0	0	0	5.59	5.59	2.19	3.64	8.87	6.53	4.69	0	0	0	0	2.5	0	0	0	0	0	0	0	74463	ENSMUSG00000011263	Exoc3l2	exocyst complex component 3-like 2
Zfp296	1.65	10.02	9.95	4.61	2.72	0	9.59	2.17	0	3.22	10.27	9.95	0	0	32.13	5.6	0	12.67	9.14	5.59	5.59	10.23	0	5.74	3.63	2.68	0	0	15.09	9.47	0.83	10.1	7.02	6.03	10.67	6.99	4.97	3.93	63872	ENSMUSG00000011267	Zfp296	zinc finger protein 296
Plin5	0	0	0	0	0	0	0	0	0	0	0.64	0.3	0	0	0	0	0	0	0	0	0	0	0	0	0	0	0	0	0	0	0	0	0	0	0	0	2.48	0	66968	ENSMUSG00000011305	Plin5	perilipin 5
Sugp1	91.55	128.38	122.3	107.95	121.45	119.21	178.46	127.93	95.38	95.22	102.35	115.81	101.35	77.57	83.54	120.46	74.38	117.18	176.66	109.04	93.67	95.73	176.67	158.1	74.75	105.77	74.63	224.8	149.93	108.93	129.82	86.42	91.26	163.36	169.04	117.13	158.99	105.24	70616	ENSMUSG00000011306	Sugp1	SURP and G patch domain containing 1
Dhdh	0	1.25	0.47	19.09	23.57	1.08	14.01	19.51	10.04	0	0.64	0	0	0	6.43	58.83	51.13	38.01	21.32	67.1	40.27	52.62	41.89	36.52	5.08	11.38	72.14	0	33.95	30	42.44	44.89	11.7	49.76	50.88	76.04	38.51	29.47	71755	ENSMUSG00000011382	Dhdh	dihydrodiol dehydrogenase (dimeric)
Zfp790	11.03	22.54	16.59	18.43	7.25	4.33	18.44	22.55	36.14	14.32	15.08	9.95	0	0	3.21	5.6	0	15.84	15.23	22.37	24.61	31.42	20.04	18.26	20.32	45.52	47.26	0	2.83	18.63	16.64	13.47	4.68	14.58	11.49	13.99	22.36	28.06	233056	ENSMUSG00000011427	Zfp790	zinc finger protein 790
Fsd1	0	0	0	0	0	0	0	0	0	0	0	0	0	0	0	0	0	0	0	0	0	0	0	0	0.73	0	0	0	0	0	0	0	0	0	0	0	0	0	240121	ENSMUSG00000011589	Fsd1	fibronectin type 3 and SPRY domain-containing protein
Pinlyp	9.38	10.02	3.79	0	0	0	0	0	0	0.72	0	0	36.38	0	0	0	0	0	0	0	0	0	0	0	0	0	0	0	0	0	0	0	0	0	0	0	0	0	641361	ENSMUSG00000011632	Pinlyp	phospholipase A2 inhibitor and LY6/PLAUR domain containing
Fuz	33.09	23.8	29.39	62.53	29	7.59	148.96	88.03	35.14	29.35	45.88	26.54	36.38	68.44	19.28	36.42	62.75	41.17	30.46	89.47	165.82	157.12	143.89	99.66	31.21	94.39	0	85.49	105.61	39.15	88.21	67.34	28.08	59.82	52.52	53.32	28.57	62.58	70300	ENSMUSG00000011658	Fuz	fuzzy planar cell polarity protein
Sptbn4	0	0.63	0	7.24	0.91	1.08	4.42	2.6	7.03	0.72	0	0	0	0	0	0	0	15.84	3.05	0	7.83	6.58	0	8.35	0	4.02	0	0	0	5.05	4.16	8.98	11.7	0	11.49	4.37	7.45	5.89	80297	ENSMUSG00000011751	Sptbn4	spectrin beta/ non-erythrocytic 4
Pgam1	0.55	1.25	2.37	3.29	1.81	2.17	0.74	0.87	2.01	1.43	3.85	4.83	0	31.94	0	0	4.65	0	0	2.8	1.68	2.92	5.46	3.65	0.73	2.01	0	0	2.83	3.16	1.66	0	0	1.51	2.46	1.75	0	1.4	18648	ENSMUSG00000011752	Pgam1	phosphoglycerate mutase 1
Evi5	46.32	28.81	16.59	59.24	55.29	61.77	30.97	65.92	65.26	97.01	68.98	82.94	62.37	13.69	48.19	64.43	65.08	77.59	85.29	173.35	158.55	97.92	111.1	80.88	114.66	123.18	111.94	145.65	58.46	287.96	182.25	112.23	138.06	186.99	173.14	202.79	197.5	199.54	14020	ENSMUSG00000011831	Evi5	ecotropic viral integration site 5
Evi5l	38.05	51.35	16.59	25.01	26.28	21.67	45.72	19.95	9.04	39.38	42.35	40.71	5.2	77.57	0	0	27.89	17.42	3.05	33.55	53.69	47.5	52.82	55.83	18.87	36.15	92.04	56.99	76.38	16.1	14.98	23.57	18.72	38.7	41.03	29.72	42.23	32.84	213027	ENSMUSG00000011832	Evi5l	ecotropic viral integration site 5 like
Snapc2	88.24	73.27	71.1	109.27	71.6	59.6	89.97	57.24	110.44	69.09	84.06	92.89	181.91	301.15	48.19	5.6	20.92	134.6	57.87	114.63	112.41	159.31	234.96	170.1	134.26	131.88	114.43	88.65	55.64	57.47	168.94	131.31	30.42	98.02	61.54	86.53	75.77	102.44	102209	ENSMUSG00000011837	Snapc2	small nuclear RNA activating complex/ polypeptide 2
Git1	73.9	134.02	86.27	231.69	154.08	131.13	257.37	142.68	103.41	221.58	244.48	265.4	179.31	27.38	298.81	159.68	206.86	115.6	143.16	424.98	400.14	368.31	395.24	360.55	162.56	256.4	504.98	661.74	274.4	153.14	236.34	111.11	142.74	363.92	377.47	388.09	422.33	185.23	216963	ENSMUSG00000011877	Git1	GIT ArfGAP 1
Gltp	911.6	635.01	488.24	808.96	984.32	842.04	1062.65	1323.97	1172.66	996.2	977.26	1043.5	1029.09	917.13	925.34	1190.59	766.99	823.44	618.33	394.23	478.43	483.05	428.02	372.03	446.32	532.89	1323.41	1757.26	897.71	1264.26	1027.76	1361.4	1397	835.9	896.9	1107.45	1105.51	1534.3	56356	ENSMUSG00000011884	Gltp	glycolipid transfer protein
Bnip2	277.4	347.57	321.39	358.07	298.2	318.61	358.4	258.03	339.35	319.66	266.61	364.92	353.42	346.77	167.08	355.78	429.98	508.32	243.68	198.51	233.48	176.12	183.96	247.85	167.64	168.7	283.59	516.1	377.19	267.12	247.99	194.16	231.66	271.43	304.44	312.92	310.54	401.04	12175	ENSMUSG00000011958	Bnip2	BCL2/adenovirus E1B interacting protein 2
Ccnt1	176.47	226.07	169.7	148.76	74.32	127.88	132.74	143.54	158.63	200.1	163.95	191.81	54.57	246.39	106.03	215.71	167.34	201.11	94.42	164.96	196.85	192.93	211.28	166.97	120.47	121.84	106.97	6.33	130.13	113.99	88.21	212.12	131.04	153.31	138.68	161.7	185.08	154.08	12455	ENSMUSG00000011960	Ccnt1	cyclin T1
Scarf2	0.55	2.5	0.95	17.77	16.31	18.42	20.65	9.97	9.04	21.12	20.85	21.41	2.6	0	0	2.8	0	52.26	3.05	131.41	50.61	105.96	98.35	110.62	45.72	60.25	0	0	1.89	2.21	0	0	0	7.04	13.13	11.36	2.48	6.74	224024	ENSMUSG00000012017	Scarf2	scavenger receptor class F/ member 2
Brms1l	78.86	56.36	74.42	23.04	37.16	43.35	47.2	42.5	30.12	35.8	17.65	25.94	33.78	127.76	25.7	11.21	51.13	3.17	0	8.39	24.61	29.96	25.5	30.26	68.22	49.54	0	117.15	25.46	13.89	7.49	33.67	18.72	10.05	22.98	3.5	8.69	26.1	52592	ENSMUSG00000012076	Brms1l	breast cancer metastasis-suppressor 1-like
Med15	156.62	211.67	135.57	187.59	146.83	144.13	218.28	170	142.57	191.15	192.18	255.15	2.6	27.38	128.52	56.03	81.35	69.68	73.1	36.35	78.01	97.92	114.75	96.53	96.52	111.8	47.26	164.64	138.62	121.56	87.38	26.94	86.58	98.02	75.49	84.79	106.82	107.49	94112	ENSMUSG00000012114	Med15	mediator complex subunit 15
Dhdds	70.04	84.54	86.75	97.42	126.89	42.26	69.32	99.74	84.33	132.09	172.29	198.15	322.24	100.38	32.13	81.24	25.57	88.68	185.8	44.74	64.87	72.35	105.64	74.62	78.38	73.64	4.98	72.82	92.41	68.52	101.53	96.52	84.24	74.89	64.83	44.58	84.47	61.74	67422	ENSMUSG00000012117	Dhdds	dehydrodolichyl diphosphate synthase
Crybg2	63.42	21.29	15.64	15.14	5.44	16.26	1.47	0	0	1.79	3.21	1.81	0	0	0	19.61	2.32	0	0	0	0	0	0	0	0	0	0	0	0	0	0	0	0	0.5	0	0	0	0	230806	ENSMUSG00000012123	Crybg2	crystallin beta-gamma domain containing 2
Ubxn11	24.27	50.1	16.12	6.58	8.16	3.25	11.8	6.94	1	4.3	4.81	4.83	28.59	0	0	0	9.3	9.5	0	0	3.36	1.46	5.46	1.57	2.9	2.01	22.39	37.99	19.8	3.79	11.65	7.86	0	24.13	2.46	16.61	8.69	12.35	67586	ENSMUSG00000012126	Ubxn11	UBX domain protein 11
Mogat1	6.07	0	0	0	0	0	33.18	44.67	93.37	0	0	0	0	0	0	0	0	0	0	0	0	0	0	0	0	0	0	0	0	0	0	0	0	0	0	0.87	0	0.56	68393	ENSMUSG00000012187	Mogat1	monoacylglycerol O-acyltransferase 1
Tex22	3.31	0	0	0	0	0	0	0	0	0	0	0	0	0	0	0	0	0	0	0	0.28	0	0	2.09	0	0	0	0	0	0	0	5.61	0	1.01	0	0	0	0	75671	ENSMUSG00000012211	Tex22	testis expressed gene 22
Tjap1	282.36	410.19	282.52	55.29	101.51	74.78	55.31	98.44	71.28	51.55	60.64	62.43	20.79	45.63	224.91	53.23	44.16	76.01	82.24	123.02	68.79	101.58	76.5	89.23	150.22	146.61	0	0	110.33	76.1	64.08	85.3	142.74	50.26	48.41	74.3	48.44	30.03	74094	ENSMUSG00000012296	Tjap1	tight junction associated protein 1
Ehf	3.31	11.9	2.84	130.99	48.94	92.11	0	3.04	0	0.36	0	0.3	0	0	0	0	0	19	9.14	0	1.68	2.19	0	0.52	0	0	0	0	0	0	4.16	0	0	3.02	0	0	1.24	0	13661	ENSMUSG00000012350	Ehf	ets homologous factor
Nanog	0	0	0	0.66	0	0	0	0	0	0	0	0	0	0	0	0	0	0	0	0	0	0	0	0	0	0	0	0	0	0	0	0	0	0.5	0	0	0	0	71950	ENSMUSG00000012396	Nanog	Nanog homeobox
Rpl15	180.33	228.58	155.95	88.86	87.01	133.3	75.22	135.74	82.33	68.01	83.74	59.11	431.39	365.03	337.36	532.26	592.68	489.31	767.58	69.9	40.55	43.12	18.21	49.05	97.25	83.68	370.65	373.62	313.07	463.2	363.67	332.21	215.28	138.23	121.45	199.29	105.58	111.98	66480	ENSMUSG00000012405	Rpl15	ribosomal protein L15
Tmem167	84.93	154.06	101.91	131.64	116.92	82.36	112.83	91.94	152.61	203.32	178.7	108.27	28.59	182.51	6.43	67.23	88.32	47.51	60.92	114.63	90.32	99.39	122.03	108.53	91.44	105.77	69.65	60.16	44.32	66.62	82.39	51.63	107.64	112.09	74.67	99.64	103.1	210.49	66074	ENSMUSG00000012422	Tmem167	transmembrane protein 167
Steap4	11.58	0	1.42	3.29	0	0	0	0.43	0	0.72	0.64	0.6	0	0	0	14.01	0	0	0	0	0	0	0	0	0	0	27.36	66.49	51.86	16.1	9.15	4.49	7.02	4.02	2.46	23.6	12.42	5.89	117167	ENSMUSG00000012428	Steap4	STEAP family member 4
Mplkip	74.45	48.22	77.27	59.24	64.35	35.76	42.03	65.05	49.2	40.81	45.88	36.79	85.76	155.14	57.83	39.22	118.54	31.67	36.55	55.92	52.85	56.27	51	45.92	95.79	68.28	29.85	91.82	34.89	52.1	56.59	16.84	81.9	50.26	53.34	42.83	70.8	60.34	66308	ENSMUSG00000012429	Mplkip	M-phase specific PLK1 intereacting protein
Kif11	18.75	14.4	11.38	5.27	0.91	0	12.54	0.87	2.01	16.82	11.87	8.75	0	4.56	0	2.8	25.57	0	0	5.59	5.03	3.65	0	0.52	0	0	0	0	5.66	7.58	4.99	11.22	11.7	26.64	25.44	20.98	27.33	13.47	16551	ENSMUSG00000012443	Kif11	kinesin family member 11
Rpa3	62.32	28.81	49.77	40.15	48.04	36.85	30.24	20.38	54.22	77.32	58.07	45.24	46.78	41.07	19.28	8.4	41.84	9.5	6.09	0	26.84	21.92	12.75	27.65	18.87	26.78	9.95	0	20.75	19.26	21.64	10.1	16.38	21.61	26.26	24.47	28.57	95.98	68240	ENSMUSG00000012483	Rpa3	replication protein A3
Mlkl	7.72	0	5.69	39.49	14.5	47.68	62.68	82.4	74.3	30.43	10.27	14.48	2.6	0	22.49	22.41	0	11.08	63.96	0	1.96	0.73	0	0.52	0	2.01	27.36	12.66	22.63	50.2	35.78	37.04	35.1	11.56	18.87	11.36	6.21	21.05	74568	ENSMUSG00000012519	Mlkl	mixed lineage kinase domain-like
Tnpo3	221.7	254.88	187.24	154.02	122.36	140.88	255.15	221.6	299.19	233.75	185.76	215.34	153.32	187.08	128.52	184.89	197.56	248.62	124.88	234.86	292.76	233.12	245.89	187.32	164.74	184.1	241.3	180.48	86.75	161.35	287.11	235.69	147.42	204.58	215.81	159.96	161.48	300.01	320938	ENSMUSG00000012535	Tnpo3	transportin 3
Ttll5	76.1	67.01	62.57	16.46	17.22	28.18	16.22	13.44	21.08	44.03	47.8	39.81	23.39	0	0	5.6	46.48	4.75	0	16.78	24.05	14.62	9.11	13.57	5.81	12.05	0	22.16	5.66	11.05	22.47	8.98	0	10.05	11.49	21.85	13.66	8.7	320244	ENSMUSG00000012609	Ttll5	tubulin tyrosine ligase-like family/ member 5
Zfp715	2.21	21.92	8.06	18.43	23.57	6.5	24.34	26.02	18.07	24.7	25.03	10.86	67.57	91.26	9.64	16.81	30.21	9.5	6.09	95.06	96.75	89.16	83.78	102.79	58.78	99.75	0	0	12.26	18.63	26.63	19.08	4.68	30.66	20.51	17.48	37.26	72.69	69930	ENSMUSG00000012640	Zfp715	zinc finger protein 715
Retn	0	0.63	0	2.63	0	0	1.47	0	0	0	1.28	0.6	0	0	0	2.8	0	0	0	0	0.56	0	0	0	0	0	0	0	0	0	0	0	0	0	1.64	0	0	0	57264	ENSMUSG00000012705	Retn	resistin
Acp4	21.51	16.28	32.71	0	0	0	0	0.43	0	0	0	0	0	0	0	0	0	0	0	0	0	0	0	0	0	0.67	0	0	0	0	0	0	0	0.5	1.64	0	0	0	100503991	ENSMUSG00000012777	Acp4	acid phosphatase 4
Cdh23	1.65	1.88	0	1.32	0	1.08	1.47	1.73	1	1.43	0.64	0.3	0	0	0	22.41	0	6.33	0	125.82	112.69	200.23	185.78	139.84	172	166.7	0	0	0	0	0	0	0	0	3.28	0	0	0.56	22295	ENSMUSG00000012819	Cdh23	cadherin 23 (otocadherin)
Rps5	9986.25	7962.09	12393.7	6235.35	5047.56	4723.86	3631.16	2857.84	2965.78	6414.62	6979.44	7519.26	9537.28	7784.19	11184.4	10482.8	10737.9	10034.9	12506.7	2653.35	2052.7	2798.17	2642.82	2369.95	1791.8	1521.01	6554.85	8213.22	6335.82	6463.05	6988.75	6094.31	7354.73	7461.32	7827.6	5433.24	6667.82	5478.79	20103	ENSMUSG00000012848	Rps5	ribosomal protein S5
Podnl1	0.55	0	0.95	3.29	12.69	0	1.47	0.87	0	0.36	0.64	0	0	0	0	0	0	0	0	0	0	0.73	0	0	0	0	0	0	0	0	0	0	0	0.5	20.51	2.62	1.24	0.28	244550	ENSMUSG00000012889	Podnl1	podocan-like 1
Adgrl1	284.01	241.73	305.27	9.87	22.66	0	1.47	2.6	1	3.94	1.28	0	5.2	0	0	5.6	13.95	3.17	0	111.84	135.9	46.04	100.18	77.22	133.53	91.05	0	19	3.77	7.26	0	28.06	42.12	5.03	4.1	6.12	6.21	10.38	330814	ENSMUSG00000013033	Adgrl1	adhesion G protein-coupled receptor L1
Amotl1	27.57	9.39	1.9	7.9	12.69	4.33	0.74	1.73	1	10.74	3.85	0.9	0	0	0	0	6.97	0	0	139.8	92	81.85	91.07	48	35.56	36.82	0	0	11.32	4.1	1.66	7.86	0	7.54	8.21	5.24	22.36	8.7	75723	ENSMUSG00000013076	Amotl1	angiomotin-like 1
2200002J24Rik	2.76	0.63	1.9	1.32	0	0	0	0	0	0	0	0	0	0	0	0	0	0	0	0	0	0	0	0	0	0	0	0	0	0	0	0	0	0	0	0	0	0	69147	ENSMUSG00000013083	2200002J24Rik	RIKEN cDNA 2200002J24 gene
Etv5	1.65	31.94	12.32	135.59	130.52	191.82	83.33	77.19	34.14	2.86	5.13	2.71	2.6	0	22.49	47.62	6.97	41.17	12.18	223.68	188.19	138.12	143.89	269.24	118.29	211.55	37.31	196.31	96.18	73.89	86.55	58.36	58.5	80.42	101.75	95.27	91.92	97.95	104156	ENSMUSG00000013089	Etv5	ets variant 5
Gfod2	3.31	14.4	0	9.22	9.97	0	0	1.73	10.04	1.79	4.17	3.02	0	0	0	0	0	0	0	5.59	8.95	8.77	7.29	8.35	5.08	7.36	0	12.66	3.77	3.16	15.81	2.24	0	5.53	4.92	5.24	2.48	2.81	70575	ENSMUSG00000013150	Gfod2	glucose-fructose oxidoreductase domain containing 2
Enkd1	19.85	25.68	16.12	38.18	7.25	20.59	15.49	7.81	1	8.95	16.68	18.7	5.2	0	0	0	37.19	9.5	0	5.59	25.17	38	25.5	32.87	15.24	16.07	0	6.33	49.98	29.05	67.41	40.4	18.72	30.16	9.85	24.47	24.84	8.14	102124	ENSMUSG00000013155	Enkd1	enkurin domain containing 1
4933405L10Rik	0	0	0	0	0	0	0	0	0	0	0.32	0	0	0	0	0	0	0	0	0	0	0	0	0	0	2.01	0	0	0	1.89	0	0	18.72	0	0	0	0	0	71046	ENSMUSG00000013158	4933405L10Rik	RIKEN cDNA 4933405L10 gene
Atp6v0d1	1179.62	1308.23	1370.87	643.08	774.04	600.37	592.16	755.01	556.21	1350.22	1521.72	1508.56	319.64	296.58	417.69	299.75	397.44	597	612.24	324.33	328.28	449.43	382.49	496.74	453.57	496.74	149.26	531.93	570.5	696.86	669.91	621.78	468.01	328.73	298.69	379.35	383.82	469.52	11972	ENSMUSG00000013160	Atp6v0d1	ATPase/ H+ transporting/ lysosomal V0 subunit D1
Ptprs	13.24	10.02	4.27	55.29	87.01	71.52	13.27	27.32	15.06	45.46	51.33	40.11	174.11	45.63	192.78	0	18.59	148.85	149.25	190.12	100.94	122.04	136.6	134.1	215.54	218.91	17.41	22.16	109.38	71.67	58.25	97.64	51.48	45.74	58.26	50.7	38.51	45.18	19280	ENSMUSG00000013236	Ptprs	protein tyrosine phosphatase/ receptor type/ S
Slc41a1	224.45	192.26	243.17	27.65	48.94	60.69	67.84	64.62	140.56	131.01	124.8	166.48	83.16	50.19	3.21	8.4	48.81	9.5	51.78	47.53	46.42	59.92	34.61	55.31	72.57	95.06	0	34.83	55.64	46.1	34.95	30.3	117	40.71	58.26	41.08	33.54	44.34	98396	ENSMUSG00000013275	Slc41a1	solute carrier family 41/ member 1
Fer1l4	0	0	0	2.63	0	0	0	0	0	0	0	0	0	0	0	0	0	0	0	0	0	0	0	0	0	0	0	0	0	0	0	0	0	0	0	0	0	0	74562	ENSMUSG00000013338	Fer1l4	fer-1-like 4 (C, elegans)
4931406B18Rik	0	0	0	0	0	0	0	0	0	0	0	0	0	0	0	0	0	0	0	0	0	0.73	0	0	0	0	0	0	0	0	0	0	0	1.51	0	0	0	1.12	74054	ENSMUSG00000013353	4931406B18Rik	RIKEN cDNA 4931406B18 gene
Iglon5	0	0	0	0	0	0	0	0	0	0.36	0.32	1.51	0	0	0	0	0	0	0	0	0	1.46	0	0	0	0	0	0	0	0.32	0	0	0	0	0	0	0	0	210094	ENSMUSG00000013367	Iglon5	IgLON family member 5
Igf2bp1	0	0	0	1.32	0	0	0	0	0	1.43	0	0	0	0	0	0	0	0	0	2.8	0.84	1.46	0	0	0	0	0	0	4.71	2.21	0.83	0	0	0	0	0	0	0	140486	ENSMUSG00000013415	Igf2bp1	insulin-like growth factor 2 mRNA binding protein 1
B4galnt2	2.76	0.63	2.37	9.22	4.53	1.08	0	0	0	0	0	0	0	0	0	0	0	0	0	0	0	0	0	0	0	0	0	0	0	0	0	0	0	0	0	0	0	0	14422	ENSMUSG00000013418	B4galnt2	beta-1/4-N-acetyl-galactosaminyl transferase 2
Zfp651	29.23	23.17	9.95	1.97	1.81	0	1.47	5.64	0	32.57	22.14	19.6	2.6	0	0	0	27.89	0	0	109.04	53.97	57	18.21	38.61	40.64	49.54	0	0	4.71	6	14.15	24.69	23.4	15.58	2.46	18.36	11.18	14.31	270210	ENSMUSG00000013419	Zfp651	zinc finger protein 651
Nelfb	191.92	197.27	225.63	294.23	219.34	202.65	323	290.99	290.15	243.41	287.15	309.13	168.92	123.2	173.5	201.7	44.16	183.69	197.99	276.8	351.76	362.47	384.31	315.16	239.49	401.68	154.23	357.78	341.36	137.03	179.75	158.25	245.7	220.16	271.61	201.91	214.89	184.39	58202	ENSMUSG00000013465	Nelfb	negative elongation factor complex member B
Card14	17.65	19.41	1.42	16.46	4.53	0	0	0	0	0	0.32	0	0	0	3.21	0	0	0	0	0	0.28	0	0	0	0	0	0	0	1.89	0.63	3.33	0	0	0	0	0	0	0	170720	ENSMUSG00000013483	Card14	caspase recruitment domain family/ member 14
Tmem175	36.95	47.59	22.75	61.21	77.04	85.61	168.14	168.69	160.64	64.07	62.88	52.48	59.77	82.13	199.2	84.04	58.11	55.42	36.55	134.21	116.6	170.27	169.39	208.19	261.26	192.8	19.9	22.16	72.61	78.94	112.35	74.07	42.12	67.86	96.83	48.95	83.22	90.65	72392	ENSMUSG00000013495	Tmem175	transmembrane protein 175
Bcas1	0	0	0	45.42	19.94	67.19	4.42	0	1	15.39	13.8	29.86	0	73.01	0	0	0	0	0	0	1.4	0	0	0	2.18	0	0	0	0.94	0.32	12.48	0	0	4.52	0	0	0	0.28	76960	ENSMUSG00000013523	Bcas1	breast carcinoma amplified sequence 1
Tango2	78.31	65.76	89.59	94.13	130.52	143.05	120.94	126.63	147.59	127.79	144.05	131.8	67.57	31.94	109.24	81.24	125.51	129.85	134.02	184.53	190.14	155.66	191.24	168.54	205.38	164.02	84.58	44.33	51.86	77.99	128.99	114.48	100.62	62.83	64.01	46.33	60.86	69.6	27883	ENSMUSG00000013539	Tango2	transport and golgi organization 2
NA	4.41	1.25	0	0	0	0	0	0	0	0	0.32	0	0	0	0	0	0	0	0	11.18	0.56	2.19	0	3.13	3.63	6.69	0	0	0	0	0.83	0	0	2.51	0	0	0	0	NA	ENSMUSG00000013562	NA	NA
Aldh1a2	0	0	0.47	2.63	0.91	0	0	1.3	0	1.43	5.45	1.81	10.39	0	19.28	2.8	27.89	4.75	0	0	0	0	0	0	0	0	12.44	31.66	8.49	12.31	13.32	10.1	14.04	9.55	5.74	15.73	1.24	0.84	19378	ENSMUSG00000013584	Aldh1a2	aldehyde dehydrogenase family 1/ subfamily A2
Ndufs2	344.13	574.89	309.06	647.03	522.07	449.74	643.05	447.97	409.63	541.59	829.04	707.23	272.86	442.59	324.51	403.4	499.71	429.14	505.63	450.15	427.26	630.67	710.34	491	328.75	407.7	681.6	620.58	599.73	324.9	435.24	413.02	374.41	555.43	486.61	532.31	585.05	459.14	226646	ENSMUSG00000013593	Ndufs2	NADH:ubiquinone oxidoreductase core subunit S2
Snx31	0	0.63	0	0	0	0	61.94	84.13	89.35	0	0	0	0	0	0	0	0	0	0	0	0	0	0	0.52	0	0.67	0	0	0	0	0	0	0	0	0	0	0	0	66696	ENSMUSG00000013611	Snx31	sorting nexin 31
Atraid	254.23	250.5	194.35	215.9	220.25	211.32	247.78	256.29	230.92	216.92	286.51	218.35	168.92	91.26	176.71	201.7	181.29	308.79	389.88	287.98	311.22	475.01	435.31	453.95	571.87	688.88	298.51	72.82	424.34	595.19	426.91	393.94	182.52	222.17	175.61	210.65	240.98	221.43	381629	ENSMUSG00000013622	Atraid	all-trans retinoic acid induced differentiation factor
Cad	31.99	30.69	28.44	55.95	98.79	47.68	62.68	52.47	49.2	97.72	89.19	107.06	23.39	114.07	70.69	2.8	58.11	34.84	27.41	95.06	97.59	102.31	92.89	98.1	83.46	79.67	62.19	28.5	37.72	27.79	19.14	21.32	56.16	35.19	49.24	22.73	29.81	50.52	69719	ENSMUSG00000013629	Cad	carbamoyl-phosphate synthetase 2/ aspartate transcarbamylase/ and dihydroorotase
Lypd8	0.55	2.5	0	3195.02	881.9	1768.6	0	3.47	1	0.36	2.25	5.13	0	0	0	0	0	0	0	0	0	2.19	0	0	0	1.34	0	0	0	0	0	0	0	0	0	0	0	0	70163	ENSMUSG00000013643	Lypd8	LY6/PLAUR domain containing 8
Sh3bp5l	75.55	99.57	57.83	77.67	85.2	71.52	64.16	49.87	67.27	66.22	48.45	75.1	64.97	45.63	70.69	120.46	41.84	12.67	106.61	89.47	111.85	107.43	51	103.31	84.18	84.35	114.43	126.65	196.14	60.31	63.25	80.81	149.76	101.03	121.45	110.13	157.75	113.66	79566	ENSMUSG00000013646	Sh3bp5l	SH3 binding domain protein 5 like
1810065E05Rik	1.65	1.88	1.9	1082.78	270.1	400.97	0	0	0	0	0.96	0.6	0	0	0	0	0	0	0	0	0	1.46	0	0	0	0.67	0	0	0	0	0	0	0	0	0	0	0	0	69864	ENSMUSG00000013653	1810065E05Rik	RIKEN cDNA 1810065E05 gene
Atad1	40.81	49.47	42.19	121.77	116.02	98.62	92.92	106.68	137.55	129.94	102.03	72.68	33.78	141.45	32.13	25.21	37.19	33.25	21.32	19.57	58.72	81.85	102	92.88	122.65	98.41	17.41	6.33	24.52	32.52	18.31	34.79	21.06	47.75	29.54	30.59	23.6	114.78	67979	ENSMUSG00000013662	Atad1	ATPase family/ AAA domain containing 1
Pten	53.49	64.5	65.41	89.52	116.02	53.1	87.76	119.26	93.37	71.95	42.99	51.27	96.15	241.83	32.13	140.07	130.16	87.09	45.69	131.41	183.15	219.23	163.92	88.18	135.71	126.53	129.36	9.5	83.92	116.83	98.2	40.4	166.14	217.14	270.79	216.77	198.74	261.56	19211	ENSMUSG00000013663	Pten	phosphatase and tensin homolog
Pea15a	602.22	571.76	750.37	1429.66	1353.21	965.58	839.94	705.14	469.87	436.35	513.66	506.67	995.31	369.59	2714.97	2577.27	2249.85	2076.02	1382.86	609.51	705.49	716.17	688.48	681.97	723.54	771.22	1509.98	2305.02	1689.8	1099.75	1441.36	1612.8	2122.41	2132.24	2149.12	1910.72	2056.99	2555.57	18611	ENSMUSG00000013698	Pea15a	phosphoprotein enriched in astrocytes 15A
Timm23	3.31	6.89	5.21	21.72	9.06	3.25	14.01	6.94	5.02	24.7	20.85	25.33	2.6	13.69	9.64	0	2.32	12.67	3.05	2.8	12.02	12.42	3.64	18.78	0	3.35	2.49	0	0.94	2.21	0.83	5.61	0	5.03	2.46	10.49	4.97	8.42	53600	ENSMUSG00000013701	Timm23	translocase of inner mitochondrial membrane 23
Tnfaip8l2	237.14	256.76	250.76	730.63	1057.73	942.82	398.22	468.36	262.04	553.76	614.72	407.15	1668.37	1638.06	2011.33	1159.77	827.42	1401.43	1742.28	1493.03	1458.79	1489.33	1475.32	1572.66	1803.41	1654.24	2169.19	820.06	1229.63	1292.04	1828.33	2105.51	1659.09	1199.82	1531.22	1265.66	1176.31	1167.49	69769	ENSMUSG00000013707	Tnfaip8l2	tumor necrosis factor/ alpha-induced protein 8-like 2
Trnt1	36.95	49.47	60.2	39.49	35.35	30.34	33.18	30.79	52.21	40.45	34.97	34.98	5.2	18.25	54.62	44.82	25.57	4.75	51.78	69.9	43.06	40.92	16.39	35.48	24.67	34.81	39.8	0	13.2	46.1	25.8	21.32	30.42	46.24	66.47	19.23	48.44	57.25	70047	ENSMUSG00000013736	Trnt1	tRNA nucleotidyl transferase/ CCA-adding/ 1
Ly6g6e	39.71	10.65	16.59	9.22	25.38	34.68	0.74	1.3	1	0	0.32	0	10.39	0	0	2.8	0	4.75	0	22.37	20.97	28.5	27.32	33.92	40.64	35.48	0	0	0.94	24.94	5.83	5.61	2.34	1.51	0	0.87	2.48	3.65	70274	ENSMUSG00000013766	Ly6g6e	lymphocyte antigen 6 complex/ locus G6E
Ehmt2	175.92	427.73	302.9	399.54	446.84	382.55	679.18	570.27	518.06	308.92	345.54	413.48	267.67	109.51	427.33	268.93	255.66	364.21	831.54	229.27	229.85	271.12	322.38	255.15	402.77	369.54	651.75	940.37	678.94	517.83	390.3	526.38	241.02	382.52	321.67	307.67	387.55	312.64	110147	ENSMUSG00000013787	Ehmt2	euchromatic histone lysine N-methyltransferase 2
Elof1	142.28	211.67	95.28	271.85	201.21	131.13	195.42	150.91	132.53	183.99	184.16	199.65	228.69	82.13	173.5	313.75	216.15	204.28	243.68	156.57	128.91	203.16	156.64	166.97	88.54	135.23	159.21	72.82	298.92	191.03	281.28	199.78	109.98	148.78	119.81	161.7	257.12	120.68	66126	ENSMUSG00000013822	Elof1	ELF1 homolog/ elongation factor 1
Med16	113.61	72.02	120.88	53.32	87.92	109.45	80.38	130.97	105.42	54.77	37.54	49.16	109.15	168.82	218.48	75.64	83.67	74.43	188.85	100.65	97.31	57.73	74.68	65.74	63.14	66.95	119.41	91.82	193.31	137.67	223.03	194.16	18.72	103.04	130.47	106.64	105.58	44.34	216154	ENSMUSG00000013833	Med16	mediator complex subunit 16
St3gal1	113.05	94.56	201.46	188.91	375.24	229.75	199.85	195.58	126.5	236.61	198.6	344.12	433.99	670.74	205.63	364.18	137.13	292.96	405.11	30.76	10.63	7.31	1.82	20.35	43.54	24.77	706.48	354.62	442.25	596.13	461.87	460.16	369.73	252.33	170.68	215.02	147.81	279.52	20442	ENSMUSG00000013846	St3gal1	ST3 beta-galactoside alpha-2/3-sialyltransferase 1
Tmem259	322.07	908.68	456.96	533.16	452.28	272.01	1027.25	569.83	336.34	369.77	609.27	580.86	293.65	392.4	379.13	196.1	125.51	389.55	703.61	1481.85	878.29	1304.45	1648.35	879.21	354.15	779.25	532.35	474.94	588.41	583.82	805.56	565.66	336.97	728.84	738.53	601.36	842.17	330.04	216157	ENSMUSG00000013858	Tmem259	transmembrane protein 259
Rnf170	22.61	39.45	10.9	24.35	25.38	4.33	19.91	12.58	19.08	43.67	28.55	17.79	44.18	54.75	3.21	16.81	92.97	33.25	24.37	53.12	53.41	51.89	56.46	31.31	5.81	26.11	0	9.5	33.95	14.21	21.64	13.47	18.72	44.74	27.9	26.22	26.08	20.77	77733	ENSMUSG00000013878	Rnf170	ring finger protein 170
Clip3	0	0	0	12.51	6.34	6.5	0	0	0	1.07	0.32	0.6	0	0	0	2.8	16.27	0	0	5.59	4.47	12.42	29.14	4.17	1.45	6.03	0	0	0	0	0	0	2.34	3.52	0	13.11	0	3.09	76686	ENSMUSG00000013921	Clip3	CAP-GLY domain containing linker protein 3
LOC108167416	0	0	0	0	0	0	0	0	0	0	0	0	0	0	0	0	0	0	0	0	0.28	0	0	0	0	2.01	0	0	0	0.32	0	0	0	3.52	0	0	0	0	108167416	ENSMUSG00000013928	LOC108167416	uncharacterized LOC108167416
Myl2	0	0	0	0.66	0	0	0	0	0	0.36	0.64	0	0	0	0	0	9.3	0	30.46	97.86	124.43	125.69	94.71	120.53	60.23	82.34	0	0	4.71	11.05	0	0	407.17	674.55	1190.67	761.32	469.53	568.31	17906	ENSMUSG00000013936	Myl2	myosin/ light polypeptide 2/ regulatory/ cardiac/ slow
Dedd	72.24	52.6	72.05	78.99	96.08	119.21	78.17	75.89	164.65	62.64	53.9	63.64	12.99	209.89	35.34	58.83	62.75	12.67	3.05	69.9	89.2	114	109.28	133.58	190.14	155.98	32.34	19	83.92	59.04	89.04	98.77	56.16	54.29	35.29	39.33	52.17	107.21	21945	ENSMUSG00000013973	Dedd	death effector domain-containing
Mcemp1	70.59	83.29	91.49	19.09	13.6	17.34	19.91	1.3	1	2674.67	2749.23	2675.11	96.15	31.94	35.34	0	2.32	9.5	18.28	0	0.28	0.73	0	14.09	4.35	0	0	0	2.83	0.63	0	0	16.38	15.08	14.77	3.5	1.24	1.4	69189	ENSMUSG00000013974	Mcemp1	mast cell expressed membrane protein 1
NA	0	10.02	0	0	0	0	0	0	0	0.72	0	0	0	77.57	0	0	6.97	0	0	11.18	6.99	0	0	2.09	0	0	0	0	0	0	0	7.86	0	1.51	0	0	0	0	NA	ENSMUSG00000013989	NA	NA
Nit1	116.91	132.76	119.45	103.34	96.08	149.55	137.9	180.84	148.59	135.31	140.2	115.51	166.32	31.94	115.67	204.5	58.11	133.02	33.51	254.43	171.69	206.08	187.6	180.02	409.31	255.06	87.07	98.15	127.3	88.09	120.67	121.21	91.26	107.57	105.04	90.9	83.22	92.89	27045	ENSMUSG00000013997	Nit1	nitrilase 1
Pax5	0.55	0	0	0.66	0	0	15.49	8.67	0	6.44	7.7	3.92	0	0	0	0	0	0	0	0	0	0	0	0	10.16	0	0	0	0	0	0	0	0	41.72	13.95	0	1.24	0	18507	ENSMUSG00000014030	Pax5	paired box 5
Prdm15	7.72	20.04	33.18	13.16	12.69	31.43	24.34	43.37	10.04	16.11	14.12	10.86	31.18	0	6.43	16.81	13.95	9.5	3.05	5.59	14.26	10.23	7.29	15.65	28.3	52.89	0	22.16	14.14	14.52	26.63	13.47	0	10.56	13.95	6.99	3.73	21.61	114604	ENSMUSG00000014039	Prdm15	PR domain containing 15
Rnf168	56.8	88.93	52.62	46.73	33.54	35.76	74.48	66.35	72.29	44.74	31.76	35.89	70.17	141.45	22.49	207.3	48.81	95.01	6.09	125.82	92.28	97.92	80.14	79.83	31.93	54.9	77.12	34.83	47.15	76.41	126.49	67.34	56.16	85.95	126.37	100.52	83.22	69.6	70238	ENSMUSG00000014074	Rnf168	ring finger protein 168
Tctex1d2	310.48	217.93	267.82	84.25	107.86	92.11	28.76	24.72	19.08	35.08	27.59	22.92	124.74	59.32	73.9	184.89	113.89	68.09	146.21	47.53	33.28	43.85	43.71	56.35	68.22	32.13	7.46	9.5	32.06	21.47	15.81	22.45	11.7	52.28	57.44	20.98	23.6	32.84	66061	ENSMUSG00000014075	Tctex1d2	Tctex1 domain containing 2
Chp1	1064.91	849.82	1217.28	358.73	300.01	370.63	180.67	212.06	360.43	2113.03	1830.04	1875.59	272.86	54.75	134.95	106.45	148.75	71.26	161.44	39.14	90.04	106.69	89.25	131.49	182.16	188.12	211.45	227.97	311.18	173.98	122.33	130.19	243.36	152.81	141.96	166.95	130.42	298.89	56398	ENSMUSG00000014077	Chp1	calcineurin-like EF hand protein 1
Trpv4	3.86	11.27	6.64	44.76	32.63	27.09	49.41	36.86	27.11	5.01	4.17	2.41	0	0	80.32	44.82	9.3	66.51	130.98	50.33	9.23	35.81	7.29	8.35	6.53	13.39	291.05	170.98	350.79	180.92	370.33	297.42	182.52	300.08	285.56	460.64	419.84	239.67	63873	ENSMUSG00000014158	Trpv4	transient receptor potential cation channel/ subfamily V/ member 4
Klhl3	2.21	0	0	0	0	0	0	0	0	0.36	0.64	1.51	0	0	0	0	0	0	0	8.39	12.58	2.92	0	0	7.26	0	0	0	0	0.32	0	17.96	0	0	0	0	0	0	100503085	ENSMUSG00000014164	Klhl3	kelch-like 3
Tvp23b	86.58	67.01	87.22	107.95	78.85	72.61	61.94	86.73	118.47	81.26	56.15	67.86	72.76	54.75	38.56	33.62	65.08	22.17	12.18	30.76	79.41	101.58	58.28	66.79	152.4	150.63	29.85	15.83	31.12	43.26	18.31	22.45	79.56	38.7	36.93	38.46	77.01	66.79	67510	ENSMUSG00000014177	Tvp23b	trans-golgi network vesicle protein 23B
Dnajc7	331.99	180.99	239.38	291.59	502.13	407.47	453.53	678.25	856.4	339.7	365.75	356.18	459.97	369.59	722.92	512.65	536.89	367.38	274.14	411	511.99	438.47	422.56	450.3	777.24	746.45	457.72	620.58	375.3	256.7	244.66	272.73	315.9	208.6	219.1	188.8	197.5	338.18	56354	ENSMUSG00000014195	Dnajc7	DnaJ heat shock protein family (Hsp40) member C7
Zfp385c	0	0	0	0	2.72	1.08	5.9	5.64	0	0.36	1.6	1.21	2.6	0	0	19.61	11.62	17.42	0	25.16	19.85	21.19	12.75	26.61	14.51	26.78	0	0	1.89	0	0	0	0	1.01	1.64	0	8.69	1.4	278304	ENSMUSG00000014198	Zfp385c	zinc finger protein 385C
Cacybp	205.7	207.29	331.34	194.18	305.45	114.87	88.49	198.62	247.98	207.26	253.14	255.15	88.36	22.81	118.88	148.47	204.53	267.62	231.49	69.9	57.88	108.16	80.14	72.01	206.83	156.65	49.75	120.32	116.93	287.65	136.48	217.73	264.42	208.1	157.55	287.57	201.23	239.11	12301	ENSMUSG00000014226	Cacybp	calcyclin binding protein
Cluap1	131.25	73.27	79.64	57.27	41.69	62.85	50.15	58.54	58.23	65.51	70.9	58.21	70.17	191.64	0	33.62	39.51	42.76	60.92	83.88	116.6	80.39	92.89	116.36	111.76	143.26	92.04	151.98	62.24	79.57	44.94	41.53	79.56	53.78	51.7	53.32	57.14	45.75	76779	ENSMUSG00000014232	Cluap1	clusterin associated protein 1
Zswim7	55.15	50.73	48.35	34.23	33.54	7.59	53.1	34.69	30.12	18.61	43.31	25.94	85.76	36.5	64.26	2.8	11.62	30.09	3.05	8.39	35.79	23.39	21.86	37.57	24.67	34.81	72.14	15.83	16.03	25.89	30.79	24.69	7.02	17.59	25.44	28.84	18.63	32.84	69747	ENSMUSG00000014243	Zswim7	zinc finger SWIM-type containing 7
Pigl	17.65	10.65	17.06	25.01	1.81	0	33.18	34.69	47.19	17.9	13.48	15.08	5.2	82.13	0	8.4	18.59	15.84	45.69	11.18	23.21	9.5	14.57	15.13	6.53	20.75	32.34	0	15.09	2.53	13.32	6.73	7.02	7.54	6.56	10.49	21.12	12.07	327942	ENSMUSG00000014245	Pigl	phosphatidylinositol glycan anchor biosynthesis/ class L
Ndufa2	1514.37	1158.55	1128.64	1217.06	817.54	1050.11	773.57	546.42	669.66	918.16	1159.5	736.79	1676.17	2582.56	1484.4	2078.62	1550.25	1041.97	2841.87	746.52	510.87	742.47	642.95	627.71	377.37	417.07	1858.24	2542.49	2156.58	785.58	1669.38	1202.03	1345.52	1404.9	1541.07	2002.5	1693.04	1058.88	17991	ENSMUSG00000014294	Ndufa2	NADH:ubiquinone oxidoreductase subunit A2
Pam16	230.52	164.08	187.24	49.37	125.99	76.94	114.3	164.36	121.48	53.34	85.02	62.13	158.52	18.25	173.5	70.03	65.08	174.19	295.46	156.57	80.53	106.69	67.39	76.18	161.11	147.95	87.07	60.16	198.97	173.98	142.3	169.47	184.86	129.68	102.57	131.99	113.03	105.52	66449	ENSMUSG00000014301	Pam16	presequence translocase-asssociated motor 16 homolog (S, cerevisiae)
Glis2	0	0	0	1.97	0	0	0	0	0	0	0.96	0	28.59	0	0	0	0	0	0	5.59	2.52	2.92	5.46	7.3	3.63	10.04	17.41	0	5.66	30.63	15.81	21.32	2.34	5.53	13.95	16.61	21.12	31.71	83396	ENSMUSG00000014303	Glis2	GLIS family zinc finger 2
Cox6c	733.47	743.98	825.27	850.42	490.35	641.55	385.68	381.62	387.54	585.26	780.59	539.85	628.89	588.6	302.02	946.87	885.53	292.96	414.25	246.04	189.58	295.97	251.35	241.59	193.77	181.42	957.73	1548.29	842.07	222.29	587.53	314.26	503.11	733.36	831.26	1209.72	900.55	747.92	12864	ENSMUSG00000014313	Cox6c	cytochrome c oxidase subunit 6C
Bicc1	0	0	0	1.97	7.25	3.25	0	0	0	2.86	0	0	0	0	0	0	0	0	0	0	0	0	0	0	0	0	0	0	4.71	5.05	0	0	0	21.61	6.56	19.23	2.48	7.58	83675	ENSMUSG00000014329	Bicc1	BicC family RNA binding protein 1
Ube2z	223.9	140.28	208.09	127.04	134.14	146.3	106.93	135.74	141.56	142.83	166.51	191.21	41.58	77.57	73.9	106.45	120.86	80.76	88.33	86.67	113.53	95.73	140.25	130.45	163.29	171.38	109.45	234.3	126.36	90.62	60.75	44.89	128.7	86.46	70.57	111.88	63.35	125.45	268470	ENSMUSG00000014349	Ube2z	ubiquitin-conjugating enzyme E2Z
Tmem87b	72.24	56.99	85.8	163.9	116.02	180.98	141.59	106.25	196.78	204.39	149.51	185.78	5.2	41.07	38.56	70.03	74.38	95.01	106.61	220.88	248.86	153.46	180.32	163.32	130.63	131.21	134.33	338.79	224.43	166.4	107.35	122.34	460.99	218.65	226.48	326.9	252.15	299.17	72477	ENSMUSG00000014353	Tmem87b	transmembrane protein 87B
Anapc1	59.01	132.14	105.71	103.34	115.11	45.52	103.24	122.73	167.67	127.79	75.08	78.11	23.39	0	35.34	86.84	23.24	71.26	60.92	100.65	96.19	82.58	109.28	108.53	155.3	129.88	14.93	79.16	112.21	88.09	36.62	59.48	58.5	72.88	80.42	57.69	69.56	85.04	17222	ENSMUSG00000014355	Anapc1	anaphase promoting complex subunit 1
Mertk	2.21	14.4	1.42	422.58	309.98	274.18	5788.17	3971.92	4978.77	2024.62	1242.91	1191.89	18.19	0	504.44	322.16	178.96	215.36	255.86	4518.24	7075.55	3509.95	3954.21	3866.95	2520.42	2607.55	365.68	145.65	331.93	517.51	654.94	468.02	439.93	1389.32	1483.62	797.15	1084.39	848.4	17289	ENSMUSG00000014361	Mertk	MER proto-oncogene tyrosine kinase
NA	0	1.25	0	5.92	0	0	0	0	0	0	0	0	0	0	0	0	0	0	0	0	0	0	0	0	0	0	0	0	0	0	0	0	0	0	0	0	0	0	NA	ENSMUSG00000014372	NA	NA
Tsg101	467.11	350.07	469.75	279.75	341.7	515.84	156.34	223.77	323.28	307.13	318.91	293.15	132.53	177.95	112.45	165.28	118.54	123.52	76.15	137	175.32	175.39	162.1	210.8	356.33	468.62	59.7	34.83	126.36	118.41	54.09	94.28	215.28	110.08	93.55	92.65	86.95	161.09	22088	ENSMUSG00000014402	Tsg101	tumor susceptibility gene 101
Hps5	79.96	130.26	139.36	114.53	120.55	127.88	101.03	146.58	133.53	37.94	54.22	30.46	142.93	127.76	163.86	84.04	99.94	82.34	67.01	19.57	28.52	35.81	65.57	39.13	111.76	131.21	47.26	113.98	37.72	70.73	20.8	48.26	32.76	48.25	71.39	29.72	34.78	50.8	246694	ENSMUSG00000014418	Hps5	HPS5/ biogenesis of lysosomal organelles complex 2 subunit 2
Map3k4	160.48	127.75	153.58	80.3	53.48	60.69	91.44	80.66	81.32	66.22	48.13	50.06	62.37	223.58	35.34	246.52	99.94	115.6	12.18	343.9	298.36	142.5	187.6	126.27	206.1	97.07	216.42	132.98	81.1	62.2	54.09	113.36	86.58	218.15	173.96	125.87	121.73	72.13	26407	ENSMUSG00000014426	Map3k4	mitogen-activated protein kinase kinase kinase 4
Piezo1	18.2	6.89	4.27	118.48	159.52	84.53	202.06	136.6	71.28	251.29	284.58	279.57	67.57	0	134.95	86.84	188.26	109.26	213.22	570.37	291.93	314.24	360.63	274.98	139.34	198.16	184.08	69.66	173.51	185.66	217.2	235.69	149.76	263.89	260.13	393.33	259.61	136.11	234839	ENSMUSG00000014444	Piezo1	piezo-type mechanosensitive ion channel component 1
Blk	6.07	6.89	13.27	0	0	0	7.37	1.73	0	7.16	7.7	0.9	41.58	0	0	0	0	0	0	0	0	0	0	0	1.45	0	0	0	0	0	0	0	0	13.57	13.13	0	0	0	12143	ENSMUSG00000014453	Blk	B lymphoid kinase
Rnf166	319.86	485.34	287.26	311.34	304.54	448.65	1030.94	904.19	1314.22	736.68	652.26	690.64	335.23	597.73	321.3	459.43	481.11	348.38	368.56	986.97	940.37	686.94	668.45	649.62	754.75	787.96	532.35	360.95	435.65	335.01	342.03	372.62	493.75	560.96	459.53	399.45	500.58	281.49	68718	ENSMUSG00000014470	Rnf166	ring finger protein 166
Ankrd28	37.5	40.08	19.91	3.95	4.53	0	0.74	0.87	0	4.65	4.17	1.51	0	0	0	0	0	0	0	2.8	3.36	3.65	9.11	4.7	0	7.36	0	0	4.71	1.58	0	0	0	1.51	2.46	0.87	0	1.96	105522	ENSMUSG00000014496	Ankrd28	ankyrin repeat domain 28
Ankrd52	13.79	15.66	22.28	26.99	3.63	0	27.29	20.38	3.01	11.81	9.95	9.65	12.99	95.82	35.34	64.43	11.62	11.08	21.32	123.02	106.26	37.27	41.89	37.57	21.77	6.69	57.21	0	12.26	7.89	9.99	0	0	33.17	22.98	10.49	11.18	10.95	237615	ENSMUSG00000014498	Ankrd52	ankyrin repeat domain 52
Pkd2l2	0	1.25	0.47	0.66	0	0	13.27	12.14	29.12	4.3	0.96	0.6	0	0	0	0	0	0	0	0	3.36	2.92	1.82	1.04	0	6.69	0	0	0	0	0	0	0	0	0	0	1.24	0	53871	ENSMUSG00000014503	Pkd2l2	polycystic kidney disease 2-like 2
Srp19	216.73	214.8	293.89	333.06	266.47	285.01	280.96	243.72	416.65	394.11	371.53	364.92	200.1	228.14	86.75	207.3	167.34	277.12	234.54	243.25	305.07	295.97	302.35	280.2	252.55	216.24	186.57	72.82	198.02	188.82	225.52	273.85	297.18	208.6	198.58	208.9	259.61	327.8	66384	ENSMUSG00000014504	Srp19	signal recognition particle 19
Clec4f	9.38	7.51	6.64	0	0	0	0	0	0	0	0	0	41.58	0	0	0	0	0	0	0	0	0	0	0	0	0	0	0	0	0	0	0	0	26.64	6.56	13.99	14.91	0	51811	ENSMUSG00000014542	Clec4f	C-type lectin domain family 4/ member f
Klra17	1.1	0.63	2.84	19.75	27.19	24.93	2.95	3.04	10.04	0	2.25	0.3	0	50.19	0	14.01	39.51	1.58	12.18	0	0	0	0	0	0	0	0	0	0	0	0	0	0	10.05	7.39	1.75	0	0.28	170733	ENSMUSG00000014543	Klra17	killer cell lectin-like receptor/ subfamily A/ member 17
Wdfy2	32.54	35.7	32.71	9.22	5.44	9.75	5.9	0	4.02	4.65	3.53	7.24	18.19	0	19.28	33.62	30.21	0	0	44.74	28.8	16.81	16.39	12	4.35	1.34	52.24	0	9.43	28.1	19.97	4.49	0	34.68	11.49	20.1	22.36	8.7	268752	ENSMUSG00000014547	Wdfy2	WD repeat and FYVE domain containing 2
Rbsn	40.81	48.22	60.67	63.85	58.01	63.94	58.26	63.31	117.47	74.81	69.94	86.56	106.55	82.13	9.64	114.86	62.75	41.17	0	106.25	142.33	73.08	98.35	108.53	127	125.86	121.89	265.96	82.04	81.78	131.49	121.21	109.98	85.45	108.32	158.21	116.76	155.48	78287	ENSMUSG00000014550	Rbsn	rabenosyn/ RAB effector
Mrps25	139.53	136.52	75.37	77.01	150.46	80.19	58.26	85.87	96.38	120.63	133.15	109.78	93.55	86.69	151.01	117.66	192.91	153.6	191.89	83.88	72.7	105.23	74.68	85.05	73.3	89.04	92.04	56.99	223.48	182.82	214.71	200.9	182.52	134.71	129.65	225.51	187.56	137.8	64658	ENSMUSG00000014551	Mrps25	mitochondrial ribosomal protein S25
Dguok	196.88	137.77	283.94	124.4	188.52	262.26	294.24	347.36	562.23	109.89	193.78	149.59	246.88	136.88	179.93	232.51	183.61	178.94	100.52	123.02	185.39	260.89	196.71	211.32	271.42	247.03	116.92	221.64	213.11	203.34	177.26	177.33	109.98	120.64	100.11	97.9	157.75	234.34	27369	ENSMUSG00000014554	Dguok	deoxyguanosine kinase
Camta1	96.51	46.34	70.15	59.9	48.04	78.03	33.18	33.39	19.08	22.55	14.44	22.02	28.59	31.94	51.41	50.42	58.11	41.17	60.92	39.14	30.2	24.12	27.32	32.87	55.15	71.63	9.95	0	33	81.15	28.29	10.1	39.78	28.65	16.41	27.1	38.51	56.13	100072	ENSMUSG00000014592	Camta1	calmodulin binding transcription activator 1
Csf1	0.55	1.25	6.64	9.87	4.53	14.09	31.71	31.66	24.1	6.44	6.1	5.43	23.39	45.63	3.21	25.21	18.59	4.75	33.51	629.09	230.97	127.89	142.07	134.62	62.41	66.95	0	75.99	11.32	15.79	18.31	5.61	39.78	56.8	37.75	67.3	62.11	17.96	12977	ENSMUSG00000014599	Csf1	colony stimulating factor 1 (macrophage)
Strip1	154.97	126.5	72.53	142.83	140.49	134.38	115.04	72.42	69.28	112.76	115.5	166.18	41.58	13.69	64.26	67.23	102.27	26.92	54.83	195.72	159.38	143.96	222.21	235.32	117.57	196.82	238.81	85.49	192.37	88.09	77.39	102.13	149.76	89.47	104.21	103.14	88.19	88.68	229707	ENSMUSG00000014601	Strip1	striatin interacting protein 1
Kif1a	8.82	0	4.74	13.16	11.78	18.42	33.18	23.42	22.09	5.37	15.08	25.94	0	9.13	28.92	0	0	1.58	27.41	5.59	1.96	2.92	0	0.52	0	0	0	0	0	1.26	4.99	0	16.38	0	4.1	0	0	0	16560	ENSMUSG00000014602	Kif1a	kinesin family member 1A
Slc25a11	659.02	571.14	621.91	405.47	519.35	524.51	417.39	487	404.61	509.73	547.66	428.86	618.49	515.6	655.45	282.94	604.3	490.9	286.32	296.37	453.55	598.51	637.48	551.53	1088.58	792.64	191.55	481.27	333.81	463.52	421.09	474.75	531.19	389.05	411.94	421.3	450.9	548.38	67863	ENSMUSG00000014606	Slc25a11	solute carrier family 25 (mitochondrial carrier oxoglutarate carrier)/ member 11
Chrne	59.01	38.2	62.57	0.66	0	0	0	0	0	0.72	1.28	0.6	0	0	0	0	0	0	0	0	0	0	0	0	0	0	0	0	0	0	0	0	0	0	3.28	0	0	0	11448	ENSMUSG00000014609	Chrne	cholinergic receptor/ nicotinic/ epsilon polypeptide
Cmc2	205.7	134.02	172.54	95.44	87.01	192.9	101.77	54.64	87.35	184.35	231	244.59	706.85	301.15	151.01	145.67	169.67	248.62	252.81	22.37	50.61	70.16	51	32.35	69.67	58.24	149.26	123.48	137.67	202.71	144.8	215.49	269.1	119.13	115.7	164.33	186.32	118.71	66531	ENSMUSG00000014633	Cmc2	COX assembly mitochondrial protein 2
Chfr	49.63	73.27	93.38	46.73	36.25	43.35	29.5	58.11	79.32	54.41	40.75	42.22	124.74	278.33	9.64	14.01	62.75	26.92	15.23	50.33	56.76	42.39	47.36	37.05	83.46	50.21	17.41	63.32	72.61	56.52	24.97	37.04	25.74	23.62	22.16	27.97	33.54	33.4	231600	ENSMUSG00000014668	Chfr	checkpoint with forkhead and ring finger domains
Ceacam16	0	0.63	0.95	13.82	29.91	13	443.94	240.68	259.03	52.62	67.05	62.43	0	0	0	0	23.24	0	0	2.8	2.52	0	1.82	3.65	0	0	0	0	0	0	5.83	20.2	16.38	5.53	9.03	0.87	4.97	1.12	330483	ENSMUSG00000014686	Ceacam16	carcinoembryonic antigen-related cell adhesion molecule 16
Hoxa2	2.21	0	0	5.27	0	0	0	0	0	0	0	0	0	0	0	0	0	0	0	0	0	0	0	0	0	0	0	0	0	0	0	0	0	0	0	0	0	0	15399	ENSMUSG00000014704	Hoxa2	homeobox A2
Adam28	0	0	0	0.66	0	0	0	0.87	0	1.07	0	0	0	0	0	8.4	0	0	0	0	0	0	1.82	0.52	0	0	0	0	0	0	0	0	0	0	0	0	0	0	13522	ENSMUSG00000014725	Adam28	a disintegrin and metallopeptidase domain 28
Tex261	490.82	432.74	493.93	420.6	388.83	392.3	445.41	480.5	407.62	747.78	600.6	517.53	532.74	460.85	671.51	851.62	671.7	973.88	511.72	595.53	881.37	726.4	826.91	674.67	827.32	983.44	398.02	658.58	446.97	694.65	709.03	638.61	718.39	523.76	481.69	478.99	623.56	523.97	21766	ENSMUSG00000014748	Tex261	testis expressed gene 261
Fam120b	51.29	58.24	82.01	82.28	106.05	123.54	133.48	205.12	130.52	75.89	79.89	131.19	64.97	36.5	28.92	53.23	30.21	57.01	51.78	117.43	102.9	146.16	236.78	138.27	214.09	192.14	37.31	50.66	60.35	73.25	78.23	23.57	58.5	56.8	70.57	49.82	68.32	95.14	67544	ENSMUSG00000014763	Fam120b	family with sequence similarity 120/ member B
Tbp	54.6	40.08	38.4	54.63	56.19	45.52	39.08	81.53	91.36	52.62	48.13	59.41	93.55	4.56	0	39.22	20.92	22.17	6.09	11.18	40.82	63.58	43.71	68.35	74.02	82.34	149.26	25.33	32.06	69.15	43.27	25.81	65.52	24.13	24.62	29.72	34.78	66.79	21374	ENSMUSG00000014767	Tbp	TATA box binding protein
Psmb1	1642.87	1194.88	1204.96	837.92	743.22	1135.72	648.21	637.48	825.28	1035.93	1163.03	945.79	966.72	816.75	1044.22	1042.11	862.29	829.78	819.36	402.62	527.65	553.2	550.06	627.71	687.98	556.99	860.71	661.74	996.72	837.05	650.77	630.76	1141.94	747.94	708.17	735.97	799.94	1006.4	19170	ENSMUSG00000014769	Psmb1	proteasome (prosome/ macropain) subunit/ beta type 1
Pdcd2	52.39	83.92	47.88	81.62	113.3	98.62	101.03	149.61	147.59	67.3	107.8	70.57	132.53	305.71	173.5	218.51	220.8	304.04	70.06	78.29	97.59	75.27	54.64	111.66	153.85	109.12	7.46	91.82	129.19	111.77	122.33	171.72	119.34	111.59	117.34	83.04	109.31	94.02	18567	ENSMUSG00000014771	Pdcd2	programmed cell death 2
Dll1	2.76	1.25	5.69	5.92	0	1.08	0	0.43	0	0	0	0	0	0	0	0	0	0	0	0	5.87	0.73	5.46	3.65	7.98	4.02	0	0	0	0	0	0	0	0	0	0	0	0	13388	ENSMUSG00000014773	Dll1	delta like canonical Notch ligand 1
Nol3	0	0	9.95	0.66	2.72	0	3.69	0.43	0	0	0.96	0.6	0	0	0	0	0	0	0	0	0.28	0	7.29	0	0	0	171.64	0	7.54	3.47	24.13	48.26	0	3.52	3.28	0.87	4.97	3.93	78688	ENSMUSG00000014776	Nol3	nucleolar protein 3 (apoptosis repressor with CARD domain)
Fhod1	23.16	40.71	51.67	101.37	126.89	56.35	696.88	682.59	547.17	50.47	47.8	74.49	171.52	136.88	263.46	218.51	239.39	213.78	265	156.57	112.97	119.85	162.1	174.28	143.69	118.49	29.85	85.49	92.41	55.26	68.24	136.93	18.72	30.16	42.67	26.22	45.96	46.03	234686	ENSMUSG00000014778	Fhod1	formin homology 2 domain containing 1
Plekhg4	0	0	1.42	3.29	3.63	3.25	2.95	0.87	2.01	1.07	0	0	0	0	0	0	0	0	0	0	0	0	0	0	0	0	0	0	0	0	0	8.98	0	0	0	0	0	0	102075	ENSMUSG00000014782	Plekhg4	pleckstrin homology domain containing/ family G (with RhoGef domain) member 4
Slc9a5	8.82	23.17	8.53	15.8	7.25	3.25	77.43	33.83	52.21	15.03	9.95	12.37	5.2	0	22.49	0	9.3	0	12.18	2.8	13.7	13.88	16.39	22.96	2.9	14.73	0	0	2.83	4.74	0	0	11.7	6.53	4.1	7.87	9.94	5.33	277973	ENSMUSG00000014786	Slc9a5	solute carrier family 9 (sodium/hydrogen exchanger)/ member 5
Elmo3	30.88	17.53	15.17	39.49	15.41	17.34	22.12	10.41	11.04	7.52	7.38	11.16	0	0	9.64	0	0	11.08	0	5.59	8.11	2.19	7.29	14.61	3.63	18.08	0	91.82	3.77	2.53	5.83	0	2.34	1.01	3.28	0.87	0	1.4	234683	ENSMUSG00000014791	Elmo3	engulfment and cell motility 3
Stc1	0	0	0	2.63	0	0	0	0.43	0	0	0	0	0	0	0	0	6.97	0	0	0	0	0	0	1.04	0	0	0	0	0	0	0	0	0	0	0.82	0	0	0	20855	ENSMUSG00000014813	Stc1	stanniocalcin 1
4931428F04Rik	13.24	0	9.95	3.29	3.63	17.34	19.17	12.14	2.01	2.86	8.02	5.43	0	0	0	30.82	0	7.92	0	5.59	28.24	12.42	12.75	37.05	10.89	26.78	9.95	0	14.14	2.84	7.49	6.73	0	7.54	10.67	2.62	17.39	10.38	74356	ENSMUSG00000014837	4931428F04Rik	RIKEN cDNA 4931428F04 gene
Tppp3	299.46	260.52	454.11	850.42	540.2	559.19	12.54	21.68	9.04	1132.94	1558.29	1399.98	9386.55	6114.19	697.22	1518.35	1278.32	2384.81	9716.57	5.59	6.43	16.08	10.93	18.78	16.69	6.69	7726.51	10078.1	5412.66	6453.26	6205.66	11251.5	2496.82	1541.12	739.35	2424.68	2951.33	1209.59	67971	ENSMUSG00000014846	Tppp3	tubulin polymerization-promoting protein family member 3
Msh3	55.7	48.85	46.93	25.01	11.78	40.1	18.44	15.61	10.04	17.18	17.65	19.9	49.38	59.32	0	0	25.57	72.84	6.09	25.16	24.89	17.54	27.32	17.22	13.06	11.38	0	22.16	6.6	11.05	1.66	25.81	25.74	14.07	13.95	20.1	13.66	21.89	17686	ENSMUSG00000014850	Msh3	mutS homolog 3
Tmem208	325.93	262.4	243.65	290.28	325.39	257.92	786.85	722.05	655.6	352.59	417.41	509.99	202.7	365.03	375.92	431.41	311.45	321.46	892.46	324.33	292.2	468.43	489.95	484.74	418.01	407.7	218.91	243.8	386.62	225.13	396.96	418.63	416.53	324.21	312.64	465.01	449.66	268.02	66320	ENSMUSG00000014856	Tmem208	transmembrane protein 208
E2f4	137.32	117.73	167.33	238.28	293.66	248.17	297.93	352.13	352.4	206.18	282.33	335.67	145.53	310.27	93.18	58.83	153.4	79.18	36.55	75.49	172.81	230.93	295.06	290.63	219.17	237.66	74.63	142.48	169.73	121.56	49.93	58.36	100.62	129.18	141.96	119.75	127.94	166.98	104394	ENSMUSG00000014859	E2f4	E2F transcription factor 4
Surf4	754.98	836.66	755.59	652.96	560.14	925.48	547.18	506.52	614.44	727.01	648.41	724.42	278.06	447.16	456.24	448.22	571.76	563.74	536.09	598.33	551.41	594.86	715.8	638.66	1269.28	911.81	226.37	623.75	522.41	427.21	391.96	301.91	580.33	426.75	493.99	581.26	438.48	530.14	20932	ENSMUSG00000014867	Surf4	surfeit gene 4
Surf2	233.28	129.63	216.63	157.97	167.68	306.69	194.68	308.77	321.28	140.68	121.28	137.83	218.29	205.33	269.89	257.73	144.1	216.95	152.3	145.39	176.16	207.54	229.49	249.41	570.41	412.39	146.77	376.78	253.66	208.39	213.87	273.85	320.58	105.05	122.27	83.91	132.91	166.42	20931	ENSMUSG00000014873	Surf2	surfeit gene 2
Dnajb9	50.74	58.87	46.45	105.97	95.17	75.86	65.63	83.26	103.41	134.95	215.92	156.53	62.37	73.01	109.24	47.62	62.75	39.59	27.41	139.8	81.65	126.43	153	69.92	87.81	142.6	29.85	72.82	43.38	137.35	73.23	114.48	60.84	108.57	137.86	109.26	88.19	214.41	27362	ENSMUSG00000014905	Dnajb9	DnaJ heat shock protein family (Hsp40) member B9
[truncated: 21,149 more rows]
