# Supplementary material for: Tongue immune compartment analysis reveals spatial macrophage heterogeneity
Source: eLife. 2022 Jun 24;11:e77490. doi: 10.7554/eLife.77490 (PMC9232218; doi:10.7554/eLife.77490)
Supplement: Figure 2—source data 2. — Listed are the upregulated genes that could be extracted from the bulk RNA-seq data. These genes were used for GO annotations represented in Figure 2. Each subset is represented in a separate tab. Note that heart macrophages were not separated into MHCII- and MHCII+ cells for this analysis. [file elife-77490-fig2-data2.xlsx]

## Sheet: Colon
	baseMean	log2FoldChange	lfcSE	stat	pvalue	padj	entrez	ensembl	symbol	genename	refseq
ENSMUSG00000013643	154.324	11.3685	1.48444	7.65846	1.88174e-14	2.12046e-11	70163	ENSMUSG00000013643	Lypd8	LY6/PLAUR domain containing 8	NM_001083884
ENSMUSG00000028255	196.519	11.0368	1.50184	7.34886	1.99899e-13	1.97101e-10	23844	ENSMUSG00000028255	Clca1	chloride channel accessory 1	NM_017474
ENSMUSG00000026531	272.242	10.9942	1.34959	8.14632	3.7518e-16	8.45548e-13	66289	ENSMUSG00000026531	Mptx1	mucosal pentraxin 1	NM_025470
ENSMUSG00000020581	224.243	10.9178	1.39152	7.84599	4.29554e-15	6.77664e-12	23795	ENSMUSG00000020581	Agr2	anterior gradient 2	NM_011783
ENSMUSG00000021749	61.3051	10.8568	1.25117	8.6773	4.05258e-18	1.59834e-14	18300	ENSMUSG00000021749	Oit1	oncoprotein induced transcript 1	NM_146050
ENSMUSG00000022650	93.6916	10.6907	1.37448	7.77797	7.36958e-15	9.68854e-12	57263	ENSMUSG00000022650	Retnlb	resistin like beta	NM_023881
ENSMUSG00000028415	101.89	10.6558	1.3023	8.18229	2.78493e-16	7.3225e-13	20731	ENSMUSG00000028415	Spink4	serine peptidase inhibitor, Kazal type 4	NM_011463
ENSMUSG00000060615	89.6922	10.5926	1.34258	7.88972	3.02859e-15	5.97238e-12	219033	ENSMUSG00000060615	Ang4	angiogenin, ribonuclease A family, member 4	NM_177544
ENSMUSG00000028699	57.8183	10.5706	1.46878	7.19688	6.16075e-13	5.11537e-10	66805	ENSMUSG00000028699	Tspan1	tetraspanin 1	NM_133681
ENSMUSG00000013653	46.394	10.3812	1.33443	7.77951	7.28082e-15	9.68854e-12	69864	ENSMUSG00000013653	1810065E05Rik	RIKEN cDNA 1810065E05 gene	NM_027239
ENSMUSG00000071356	64.1863	10.185	1.42405	7.15211	8.54519e-13	6.74044e-10	18489	ENSMUSG00000071356	Reg3b	regenerating islet-derived 3 beta	NM_011036
ENSMUSG00000025515	437.078	10.1683	1.13033	8.99583	2.34454e-19	1.23292e-15	#N/A	ENSMUSG00000025515	#N/A	#N/A	#N/A
ENSMUSG00000027556	177.991	10.094	2.05885	4.90274	9.45092e-07	0.000276107	12346	ENSMUSG00000027556	Car1	carbonic anhydrase 1	NM_001083957
ENSMUSG00000030017	40.5957	9.93757	2.23788	4.44062	8.96982e-06	0.00217704	19695	ENSMUSG00000030017	Reg3g	regenerating islet-derived 3 gamma	NM_011260
ENSMUSG00000022824	29.9527	9.78595	1.42717	6.8569	7.03727e-12	4.62583e-09	17063	ENSMUSG00000022824	Muc13	mucin 13, epithelial transmembrane	NM_010739
ENSMUSG00000070473	24.3868	9.77706	1.5071	6.48732	8.73763e-11	5.10536e-08	12739	ENSMUSG00000070473	Cldn3	claudin 3	NM_009902
ENSMUSG00000048992	20.7748	9.70024	1.37844	7.0371	1.96276e-12	1.40748e-09	69814	ENSMUSG00000048992	Prss32	protease, serine 32	NM_027220
ENSMUSG00000035775	15.3712	9.63875	1.58483	6.08188	1.18782e-09	5.85572e-07	66809	ENSMUSG00000035775	Krt20	keratin 20	NM_023256
ENSMUSG00000027876	24.3109	9.60268	1.71075	5.61315	1.98672e-08	7.64452e-06	67709	ENSMUSG00000027876	Reg4	regenerating islet-derived family, member 4	NM_026328
ENSMUSG00000000544	26.2088	9.58349	1.3789	6.95012	3.64978e-12	2.50343e-09	59290	ENSMUSG00000000544	Gpa33	glycoprotein A33 (transmembrane)	NM_001360925
ENSMUSG00000063903	90.4332	9.52521	1.94936	4.88634	1.02728e-06	0.0002894	16612	ENSMUSG00000063903	Klk1	kallikrein 1	NM_001320331
ENSMUSG00000037390	29.9692	9.47015	2.33951	4.04792	5.16749e-05	0.00947933	666339	ENSMUSG00000037390	Muc3	mucin 3, intestinal	NM_010843
ENSMUSG00000027875	32.4936	9.42994	1.02066	9.2391	2.48569e-20	1.96072e-16	15360	ENSMUSG00000027875	Hmgcs2	3-hydroxy-3-methylglutaryl-Coenzyme A synthase 2	NM_008256
ENSMUSG00000049382	53.3171	9.38501	0.913116	10.278	8.85381e-25	1.39678e-20	16691	ENSMUSG00000049382	Krt8	keratin 8	NM_031170
ENSMUSG00000037033	19.183	9.28745	1.72816	5.37418	7.69332e-08	2.7584e-05	229927	ENSMUSG00000037033	Clca3b	chloride channel accessory 3B	NM_139148
ENSMUSG00000022057	42.9856	9.25504	1.23066	7.52038	5.46178e-14	5.74434e-11	58860	ENSMUSG00000022057	Adamdec1	ADAM-like, decysin 1	NM_021475
ENSMUSG00000049350	83.4777	9.08225	1.46615	6.19464	5.84192e-10	2.97297e-07	69036	ENSMUSG00000049350	Zg16	zymogen granule protein 16	NM_026918
ENSMUSG00000047517	136.375	9.04692	1.28359	7.04816	1.81305e-12	1.36204e-09	12945	ENSMUSG00000047517	Dmbt1	deleted in malignant brain tumors 1	NM_001347632
ENSMUSG00000017950	11.226	9.0303	1.2415	7.2737	3.49782e-13	3.06565e-10	15378	ENSMUSG00000017950	Hnf4a	hepatic nuclear factor 4, alpha	NM_001312906
ENSMUSG00000026175	12.6901	8.94661	1.74401	5.1299	2.89902e-07	9.73083e-05	22349	ENSMUSG00000026175	Vil1	villin 1	NM_009509
ENSMUSG00000029646	10.4516	8.86114	1.6067	5.51512	3.48548e-08	1.30921e-05	12591	ENSMUSG00000029646	Cdx2	caudal type homeobox 2	NM_007673
ENSMUSG00000000385	13.6495	8.83053	1.69272	5.21675	1.82085e-07	6.38351e-05	50528	ENSMUSG00000000385	Tmprss2	transmembrane protease, serine 2	NM_015775
ENSMUSG00000023247	73.5842	8.82781	1.96048	4.50288	6.70402e-06	0.00165254	14915	ENSMUSG00000023247	Guca2a	guanylate cyclase activator 2a (guanylin)	NM_008190
ENSMUSG00000030866	6.36596	8.60955	2.08392	4.13143	3.60512e-05	0.00702153	26918	ENSMUSG00000030866	Ern2	endoplasmic reticulum (ER) to nucleus signalling 2	NM_001316689
ENSMUSG00000018569	38.5895	8.53913	1.4859	5.74676	9.09707e-09	3.98654e-06	53624	ENSMUSG00000018569	Cldn7	claudin 7	NM_001193619
ENSMUSG00000055748	20.7059	8.30593	1.32082	6.28848	3.20591e-10	1.74402e-07	74548	ENSMUSG00000055748	Gsdmc4	gasdermin C4	NM_028992
ENSMUSG00000034427	23.5112	8.14876	1.75341	4.64738	3.36185e-06	0.000869451	217328	ENSMUSG00000034427	Myo15b	myosin XVB	XR_001780366
ENSMUSG00000075420	7.65101	8.14058	1.57544	5.1672	2.37632e-07	8.14974e-05	68528	ENSMUSG00000075420	Smim6	small integral membrane protein 6	NM_001162998
ENSMUSG00000074115	10.1325	8.02663	1.88846	4.25037	2.1342e-05	0.00454988	20208	ENSMUSG00000074115	Saa1	serum amyloid A 1	NM_001357493
ENSMUSG00000007034	13.4447	7.82055	1.62936	4.79976	1.58855e-06	0.000432084	70129	ENSMUSG00000007034	Slc44a4	solute carrier family 44, member 4	NM_023557
ENSMUSG00000048706	4.66279	7.81066	1.83431	4.25808	2.06188e-05	0.00445593	52829	ENSMUSG00000048706	Lurap1l	leucine rich adaptor protein 1-like	NM_026821
ENSMUSG00000035852	17.7942	7.67996	1.90275	4.03625	5.43129e-05	0.00975884	78906	ENSMUSG00000035852	Misp	mitotic spindle positioning	NM_030218
ENSMUSG00000031089	5.41324	7.61313	1.86482	4.08251	4.45526e-05	0.00857149	56774	ENSMUSG00000031089	Slc6a14	solute carrier family 6 (neurotransmitter transporter), member 14	NM_020049
ENSMUSG00000021208	14.308	7.59195	1.323	5.73844	9.55517e-09	4.07412e-06	217845	ENSMUSG00000021208	Ifi27l2b	interferon, alpha-inducible protein 27 like 2B	NM_145449
ENSMUSG00000034981	6.40949	7.51915	1.50409	4.99914	5.75867e-07	0.000178135	231440	ENSMUSG00000034981	Parm1	prostate androgen-regulated mucin-like protein 1	NM_145562
ENSMUSG00000028392	10.646	7.41924	1.29511	5.72867	1.01221e-08	4.20226e-06	192120	ENSMUSG00000028392	Bspry	B-box and SPRY domain containing	NM_001368623
ENSMUSG00000039131	9.27597	7.4077	1.76189	4.2044	2.61774e-05	0.00543387	54120	ENSMUSG00000039131	Gipc2	GIPC PDZ domain containing family, member 2	NM_016867
ENSMUSG00000061718	15.4141	7.157	1.63096	4.3882	1.14291e-05	0.0027319	19049	ENSMUSG00000061718	Ppp1r1b	protein phosphatase 1, regulatory inhibitor subunit 1B	NM_001313970
ENSMUSG00000037362	6.76831	7.12768	1.64669	4.32848	1.50141e-05	0.00328975	18133	ENSMUSG00000037362	Ccn3	cellular communication network factor 3	NM_010930
ENSMUSG00000054161	10.476	6.90872	1.14944	6.01052	1.84932e-09	8.58085e-07	73813	ENSMUSG00000054161	Fam83e	family with sequence similarity 83, member E	NM_001033170
ENSMUSG00000053964	122.27	6.43887	1.10604	5.82156	5.83018e-09	2.62791e-06	16855	ENSMUSG00000053964	Lgals4	lectin, galactose binding, soluble 4	NM_010706
ENSMUSG00000021263	11.4199	6.43691	1.29825	4.95815	7.11682e-07	0.000215913	70059	ENSMUSG00000021263	Degs2	delta(4)-desaturase, sphingolipid 2	NM_001171002
ENSMUSG00000040026	23.2912	6.4143	1.39674	4.59233	4.38329e-06	0.00111533	20210	ENSMUSG00000040026	Saa3	serum amyloid A 3	NM_011315
ENSMUSG00000043099	24.5015	6.23714	1.4891	4.18855	2.80747e-05	0.00575203	15248	ENSMUSG00000043099	Hic1	hypermethylated in cancer 1	NM_001098203
ENSMUSG00000030739	9.29411	6.10939	1.34435	4.54448	5.50715e-06	0.00137906	71960	ENSMUSG00000030739	Myh14	myosin, heavy polypeptide 14	NM_001271538
ENSMUSG00000029153	12.2375	6.08807	1.4705	4.14014	3.4709e-05	0.00684461	433904	ENSMUSG00000029153	Ociad2	OCIA domain containing 2	NM_001310636
ENSMUSG00000030587	62.9067	5.47693	1.01545	5.39361	6.90578e-08	2.53362e-05	72275	ENSMUSG00000030587	2200002D01Rik	RIKEN cDNA 2200002D01 gene	NM_028179
ENSMUSG00000021211	6.18024	5.30514	1.31455	4.03572	5.44357e-05	0.00975884	622402	ENSMUSG00000021211	Akr1c12	aldo-keto reductase family 1, member C12	NM_013777
ENSMUSG00000038515	6.64982	5.03446	0.885668	5.68437	1.31298e-08	5.31116e-06	66790	ENSMUSG00000038515	Grtp1	GH regulated TBC protein 1	NM_001368858
ENSMUSG00000040152	58.0195	4.64371	1.07212	4.33134	1.48206e-05	0.00328975	21825	ENSMUSG00000040152	Thbs1	thrombospondin 1	NM_001313914
ENSMUSG00000027546	9.08305	3.70237	0.887416	4.17208	3.01836e-05	0.00610482	11981	ENSMUSG00000027546	Atp9a	ATPase, class II, type 9A	NM_001289445
ENSMUSG00000001156	99.6899	2.30669	0.494432	4.66533	3.08116e-06	0.000813123	17119	ENSMUSG00000001156	Mxd1	MAX dimerization protein 1	NM_010751
ENSMUSG00000031770	649.993	1.83618	0.419713	4.37485	1.21516e-05	0.00281917	64209	ENSMUSG00000031770	Herpud1	homocysteine-inducible, endoplasmic reticulum stress-inducible, ubiquitin-like domain member 1	NM_001357205

## Sheet: Heart
	baseMean	log2FoldChange	lfcSE	stat	pvalue	padj	entrez	ensembl	symbol	genename	refseq
ENSMUSG00000059741	36.8304	10.219	0.593666	17.2134	2.10665e-66	2.79195e-62	17897	ENSMUSG00000059741	Myl3	myosin, light polypeptide 3	NM_001364484
ENSMUSG00000041616	29.1577	9.88452	0.679864	14.539	6.86319e-48	4.54789e-44	230899	ENSMUSG00000041616	Nppa	natriuretic peptide type A	NM_008725
ENSMUSG00000026414	49.446	8.93794	0.937116	9.53771	1.4602e-21	1.61267e-18	21956	ENSMUSG00000026414	Tnnt2	troponin T2, cardiac	NM_001130174
ENSMUSG00000040752	13.7942	8.45794	1.19666	7.06794	1.57251e-12	9.06105e-10	17888	ENSMUSG00000040752	Myh6	myosin, heavy polypeptide 6, cardiac muscle, alpha	NM_001164171
ENSMUSG00000068614	30.8291	8.2488	0.858694	9.60621	7.52659e-22	9.06817e-19	11464	ENSMUSG00000068614	Actc1	actin, alpha, cardiac muscle 1	NM_009608
ENSMUSG00000038583	8.00759	7.8433	0.793765	9.88114	5.026e-23	7.40107e-20	18821	ENSMUSG00000038583	Pln	phospholamban	NM_001141927
ENSMUSG00000028773	10.3235	6.8842	0.726829	9.47155	2.75726e-21	2.81092e-18	14077	ENSMUSG00000028773	Fabp3	fatty acid binding protein 3, muscle and heart	NM_010174
ENSMUSG00000020469	26.0108	6.86058	1.26482	5.42415	5.8231e-08	1.67769e-05	17898	ENSMUSG00000020469	Myl7	myosin, light polypeptide 7, regulatory	NM_022879
ENSMUSG00000061086	20.4524	6.10868	0.556636	10.9743	5.08021e-28	1.34656e-24	17896	ENSMUSG00000061086	Myl4	myosin, light polypeptide 4	NM_001355754
ENSMUSG00000025488	9.24696	5.96717	1.1998	4.97348	6.57629e-07	0.000158345	12869	ENSMUSG00000025488	Cox8b	cytochrome c oxidase subunit 8B	NM_007751
ENSMUSG00000030218	29.9258	4.80121	1.21236	3.96021	7.48838e-05	0.00514215	17313	ENSMUSG00000030218	Mgp	matrix Gla protein	NM_008597
ENSMUSG00000028195	175.507	4.14849	0.926081	4.47961	7.47779e-06	0.000957638	16007	ENSMUSG00000028195	Ccn1	cellular communication network factor 1	NM_010516
ENSMUSG00000022602	22.877	3.8364	0.985321	3.89356	9.87841e-05	0.0061209	11838	ENSMUSG00000022602	Arc	activity regulated cytoskeletal-associated protein	NM_001276684
ENSMUSG00000032060	26.3497	3.44121	0.602493	5.71161	1.11912e-08	3.70793e-06	12955	ENSMUSG00000032060	Cryab	crystallin, alpha B	NM_001289782
ENSMUSG00000035385	380.563	3.3919	0.713739	4.7523	2.01115e-06	0.00036512	20296	ENSMUSG00000035385	Ccl2	chemokine (C-C motif) ligand 2	NM_011333
ENSMUSG00000044285	34.7433	3.00098	0.487173	6.15998	7.2754e-10	2.92185e-07	218963	ENSMUSG00000044285	Gm1821	ubiquitin pseudogene	NR_002875
ENSMUSG00000035458	121.458	2.45734	0.511056	4.80836	1.52177e-06	0.000310276	21954	ENSMUSG00000035458	Tnni3	troponin I, cardiac 3	NM_009406
ENSMUSG00000064342	40.0926	2.28088	0.545653	4.18009	2.91393e-05	0.00264509	#N/A	ENSMUSG00000064342	#N/A	#N/A	#N/A
ENSMUSG00000039910	323.858	2.27263	0.356635	6.37243	1.86061e-10	8.21954e-08	17684	ENSMUSG00000039910	Cited2	Cbp/p300-interacting transactivator, with Glu/Asp-rich carboxy-terminal domain, 2	NM_010828
ENSMUSG00000037868	40.5571	2.16193	0.553596	3.90525	9.41268e-05	0.00598309	13654	ENSMUSG00000037868	Egr2	early growth response 2	NM_001347458
ENSMUSG00000032366	245.071	1.97612	0.419827	4.707	2.51395e-06	0.000427145	22003	ENSMUSG00000032366	Tpm1	tropomyosin 1, alpha	NM_001164248
ENSMUSG00000028410	395.38	1.92419	0.335556	5.73433	9.78962e-09	3.32671e-06	15502	ENSMUSG00000028410	Dnaja1	DnaJ heat shock protein family (Hsp40) member A1	NM_001164671
ENSMUSG00000020063	42.4533	1.76869	0.405941	4.35702	1.31845e-05	0.00150633	93759	ENSMUSG00000020063	Sirt1	sirtuin 1	NM_001159589
ENSMUSG00000004880	51.8791	1.71562	0.454365	3.77587	0.000159449	0.00824952	98386	ENSMUSG00000004880	Lbr	lamin B receptor	NM_133815
ENSMUSG00000032265	532.383	1.43799	0.389258	3.69418	0.000220599	0.00997815	212943	ENSMUSG00000032265	Tent5a	terminal nucleotidyltransferase 5A	NM_001160378
ENSMUSG00000025980	281.224	1.335	0.338735	3.94114	8.10938e-05	0.00537368	15510	ENSMUSG00000025980	Hspd1	heat shock protein 1 (chaperonin)	NM_001356512
ENSMUSG00000090170	536.165	1.33153	0.319889	4.16249	3.14801e-05	0.00281896	#N/A	ENSMUSG00000090170	#N/A	#N/A	#N/A
ENSMUSG00000058761	208.764	1.31237	0.306581	4.28067	1.86329e-05	0.00187078	108937	ENSMUSG00000058761	Rnf169	ring finger protein 169	NM_175388
ENSMUSG00000024290	293.095	1.30982	0.33248	3.93956	8.16316e-05	0.0053824	19877	ENSMUSG00000024290	Rock1	Rho-associated coiled-coil containing protein kinase 1	NM_009071
ENSMUSG00000042599	285.284	1.187	0.309986	3.82921	0.000128554	0.00718873	338523	ENSMUSG00000042599	Kdm7a	lysine (K)-specific demethylase 7A	NM_001033430
ENSMUSG00000041040	136.024	1.15583	0.258971	4.46315	8.07638e-06	0.00100034	72750	ENSMUSG00000041040	Fam117b	family with sequence similarity 117, member B	NM_001037725
ENSMUSG00000025907	122.12	1.0982	0.295014	3.72256	0.000197217	0.00917092	12421	ENSMUSG00000025907	Rb1cc1	RB1-inducible coiled-coil 1	NM_009826
ENSMUSG00000040128	1072	1.09267	0.235081	4.64808	3.35043e-06	0.000522391	108767	ENSMUSG00000040128	Pnrc1	proline-rich nuclear receptor coactivator 1	NM_001033225
ENSMUSG00000000787	478.732	1.09026	0.238642	4.5686	4.90983e-06	0.000685221	13205	ENSMUSG00000000787	Ddx3x	DEAD/H (Asp-Glu-Ala-Asp/His) box polypeptide 3, X-linked	NM_010028
ENSMUSG00000019132	308.329	1.06946	0.265378	4.02995	5.5789e-05	0.00417724	79555	ENSMUSG00000019132	BC005537	cDNA sequence BC005537	NM_024473
ENSMUSG00000023353	291.912	1.00748	0.240046	4.19703	2.70437e-05	0.00250637	213990	ENSMUSG00000023353	Agap3	ArfGAP with GTPase domain, ankyrin repeat and PH domain 3	NM_001256431

## Sheet: sLC
	baseMean	log2FoldChange	lfcSE	stat	pvalue	padj	entrez	ensembl	symbol	genename	refseq
ENSMUSG00000068890	27.9695	10.2424	2.787	3.67506	0.000237793	0.00270638	73722	ENSMUSG00000068890	Lce1a2	late cornified envelope 1A2	NM_028625
ENSMUSG00000057182	28.086	9.62822	2.71049	3.55221	0.000382005	0.00396351	20269	ENSMUSG00000057182	Scn3a	sodium channel, voltage-gated, type III, alpha	NM_001355166
ENSMUSG00000022766	23.653	9.13895	1.47663	6.18906	6.05258e-10	4.06099e-08	15160	ENSMUSG00000022766	Serpind1	serine (or cysteine) peptidase inhibitor, clade D, member 1	NM_001331047
ENSMUSG00000004110	23.7292	8.91297	1.56075	5.71069	1.12518e-08	5.60203e-07	12290	ENSMUSG00000004110	Cacna1e	calcium channel, voltage-dependent, R type, alpha 1E subunit	NM_009782
ENSMUSG00000029503	121.125	8.89838	2.34945	3.78742	0.000152218	0.00185854	231602	ENSMUSG00000029503	P2rx2	purinergic receptor P2X, ligand-gated ion channel, 2	NM_001164833
ENSMUSG00000000627	7.99174	8.67245	1.40276	6.1824	6.31338e-10	4.2159e-08	20355	ENSMUSG00000000627	Sema4f	sema domain, immunoglobulin domain (Ig), TM domain, and short cytoplasmic domain	NM_001113481
ENSMUSG00000018907	10.067	8.61829	1.56852	5.49453	3.91762e-08	1.67779e-06	11685	ENSMUSG00000018907	Alox12e	arachidonate lipoxygenase, epidermal	NM_145684
ENSMUSG00000028347	9.39555	8.49672	1.98394	4.28274	1.84605e-05	0.000323518	230157	ENSMUSG00000028347	Tmeff1	transmembrane protein with EGF-like and two follistatin-like domains 1	NM_001356272
ENSMUSG00000025064	7.89591	8.40386	2.0102	4.1806	2.90745e-05	0.000473595	12821	ENSMUSG00000025064	Col17a1	collagen, type XVII, alpha 1	NM_001290825
ENSMUSG00000041193	36.9092	8.3217	2.36709	3.51559	0.000438775	0.00444044	18784	ENSMUSG00000041193	Pla2g5	phospholipase A2, group V	NM_001122954
ENSMUSG00000032511	5.18668	8.31576	2.46583	3.37239	0.000745189	0.00665381	20271	ENSMUSG00000032511	Scn5a	sodium channel, voltage-gated, type V, alpha	NM_001253860
ENSMUSG00000040690	171.259	8.24286	1.76405	4.67268	2.97297e-06	7.10626e-05	107581	ENSMUSG00000040690	Col16a1	collagen, type XVI, alpha 1	NM_028266
ENSMUSG00000028601	41.9721	8.241	2.02997	4.05967	4.91414e-05	0.000731153	52430	ENSMUSG00000028601	Echdc2	enoyl Coenzyme A hydratase domain containing 2	NM_001254754
ENSMUSG00000037989	58.945	8.19407	1.55309	5.27597	1.32055e-07	4.83287e-06	75607	ENSMUSG00000037989	Wnk2	WNK lysine deficient protein kinase 2	NM_001290311
ENSMUSG00000015222	18.7192	8.18683	1.5189	5.38997	7.04685e-08	2.7969e-06	17756	ENSMUSG00000015222	Map2	microtubule-associated protein 2	NM_001039934
ENSMUSG00000043165	106.993	8.18336	2.2044	3.71229	0.000205391	0.00240562	16939	ENSMUSG00000043165	Lor	loricrin	NM_008508
ENSMUSG00000085805	5.69051	8.14952	2.19047	3.72043	0.00019888	0.00234495	#N/A	ENSMUSG00000085805	#N/A	#N/A	#N/A
ENSMUSG00000059898	5.75247	7.99781	2.37711	3.36452	0.000766775	0.00678208	13507	ENSMUSG00000059898	Dsc3	desmocollin 3	NM_001291809
ENSMUSG00000024459	80.8189	7.93353	1.93148	4.10749	3.99988e-05	0.000622744	240095	ENSMUSG00000024459	H2-M5	histocompatibility 2, M region locus 5	NM_001115075
ENSMUSG00000030513	22.0472	7.91884	1.61703	4.89716	9.72332e-07	2.70754e-05	18553	ENSMUSG00000030513	Pcsk6	proprotein convertase subtilisin/kexin type 6	NM_001291184
ENSMUSG00000084950	6.18597	7.88658	1.36278	5.78713	7.16006e-09	3.7227e-07	434064	ENSMUSG00000084950	Gm5577	predicted gene 5577	NR_026990
ENSMUSG00000019761	371.833	7.76183	0.95976	8.08726	6.10237e-16	1.50846e-13	16661	ENSMUSG00000019761	Krt10	keratin 10	NM_010660
ENSMUSG00000031538	27.2266	7.75957	1.52697	5.08166	3.74145e-07	1.15355e-05	18791	ENSMUSG00000031538	Plat	plasminogen activator, tissue	NM_008872
ENSMUSG00000020674	17.1372	7.74513	1.68272	4.60274	4.16967e-06	9.32551e-05	69675	ENSMUSG00000020674	Pxdn	peroxidasin	NM_181395
ENSMUSG00000038132	7.04143	7.66144	1.2781	5.99439	2.04257e-09	1.16991e-07	666794	ENSMUSG00000038132	Rbm24	RNA binding motif protein 24	NM_001081425
ENSMUSG00000030605	3429.67	7.63826	0.712259	10.724	7.85313e-27	9.22088e-24	17304	ENSMUSG00000030605	Mfge8	milk fat globule-EGF factor 8 protein	NM_001045489
ENSMUSG00000000126	30.742	7.61126	2.15116	3.53821	0.000402853	0.00414623	216795	ENSMUSG00000000126	Wnt9a	wingless-type MMTV integration site family, member 9A	NM_139298
ENSMUSG00000038264	270.74	7.58058	1.36288	5.56219	2.66414e-08	1.19929e-06	20361	ENSMUSG00000038264	Sema7a	sema domain, immunoglobulin domain (Ig), and GPI membrane anchor, (semaphorin) 7A	NM_011352
ENSMUSG00000045875	5.73555	7.57112	2.09254	3.61815	0.000296718	0.00325098	11549	ENSMUSG00000045875	Adra1a	adrenergic receptor, alpha 1a	NM_001271759
ENSMUSG00000034783	3773.69	7.56843	1.95038	3.88049	0.000104248	0.001383	246278	ENSMUSG00000034783	Cd207	CD207 antigen	NM_144943
ENSMUSG00000020913	7.55586	7.51633	2.25714	3.33003	0.000868378	0.00752025	75706	ENSMUSG00000020913	Krt24	keratin 24	NM_029393
ENSMUSG00000033722	6.77687	7.40719	1.89082	3.91745	8.94905e-05	0.00121742	207792	ENSMUSG00000033722	BC034090	cDNA sequence BC034090	NM_001370865
ENSMUSG00000066720	4.18319	7.37963	1.67774	4.39855	1.08978e-05	0.000209116	56863	ENSMUSG00000066720	Cldn9	claudin 9	NM_020293
ENSMUSG00000029602	12.8895	7.37773	1.85238	3.98283	6.80991e-05	0.00096144	19415	ENSMUSG00000029602	Rasal1	RAS protein activator like 1 (GAP1 like)	NM_001281999
ENSMUSG00000005125	468.096	7.32662	1.24614	5.87944	4.11668e-09	2.21389e-07	17988	ENSMUSG00000005125	Ndrg1	N-myc downstream regulated gene 1	NM_008681
ENSMUSG00000044317	58.6315	7.30822	1.24429	5.87342	4.26898e-09	2.27841e-07	319197	ENSMUSG00000044317	Gpr4	G protein-coupled receptor 4	NM_175668
ENSMUSG00000014609	4.37693	7.19975	1.86255	3.86554	0.000110844	0.0014461	11448	ENSMUSG00000014609	Chrne	cholinergic receptor, nicotinic, epsilon polypeptide	NM_009603
ENSMUSG00000020435	7.61021	7.19913	2.19278	3.2831	0.00102671	0.00866069	74309	ENSMUSG00000020435	Osbp2	oxysterol binding protein 2	NM_001302630
ENSMUSG00000033508	19.303	7.17134	1.64488	4.35979	1.30186e-05	0.000243279	67855	ENSMUSG00000033508	Asprv1	aspartic peptidase, retroviral-like 1	NM_026414
ENSMUSG00000051397	16.9143	7.11526	2.0696	3.43799	0.000586044	0.00549758	56753	ENSMUSG00000051397	Tacstd2	tumor-associated calcium signal transducer 2	NM_020047
ENSMUSG00000028600	16.3617	7.09693	1.68189	4.21962	2.44714e-05	0.000409972	242608	ENSMUSG00000028600	Podn	podocan	NM_001285956
ENSMUSG00000027313	14.6293	7.02681	1.79806	3.908	9.30624e-05	0.0012584	69065	ENSMUSG00000027313	Chac1	ChaC, cation transport regulator 1	NM_026929
ENSMUSG00000004473	13.4309	6.94488	0.882229	7.87197	3.49109e-15	7.23374e-13	20256	ENSMUSG00000004473	Clec11a	C-type lectin domain family 11, member a	NM_009131
ENSMUSG00000041329	10.8841	6.92268	0.771073	8.97798	2.75782e-19	1.25347e-16	11932	ENSMUSG00000041329	Atp1b2	ATPase, Na+/K+ transporting, beta 2 polypeptide	NM_013415
ENSMUSG00000029122	6.69718	6.90807	1.84876	3.7366	0.000186526	0.00221411	59056	ENSMUSG00000029122	Evc	EvC ciliary complex subunit 1	NM_021292
ENSMUSG00000017386	58.9118	6.76514	0.988661	6.84273	7.76981e-12	8.04975e-10	22032	ENSMUSG00000017386	Traf4	TNF receptor associated factor 4	NM_009423
ENSMUSG00000041046	19.15	6.75024	1.46904	4.595	4.32748e-06	9.60224e-05	56089	ENSMUSG00000041046	Ramp3	receptor (calcitonin) activity modifying protein 3	NM_019511
ENSMUSG00000026073	1457.59	6.66153	1.80141	3.69795	0.000217348	0.00252052	16178	ENSMUSG00000026073	Il1r2	interleukin 1 receptor, type II	NM_001360800
ENSMUSG00000015619	6.37146	6.5819	1.54138	4.27014	1.95348e-05	0.000339809	14462	ENSMUSG00000015619	Gata3	GATA binding protein 3	NM_001355110
ENSMUSG00000040035	4.81072	6.47658	1.43354	4.51788	6.24619e-06	0.000130384	214240	ENSMUSG00000040035	Disp2	dispatched RND tramsporter family member 2	NM_170593
ENSMUSG00000061397	21.3971	6.44952	1.83789	3.5092	0.000449454	0.00453314	223917	ENSMUSG00000061397	Krt79	keratin 79	NM_146063
ENSMUSG00000020017	4.77603	6.44148	1.29819	4.9619	6.98085e-07	2.00964e-05	15109	ENSMUSG00000020017	Hal	histidine ammonia lyase	NM_010401
ENSMUSG00000036832	83.8927	6.32785	1.93269	3.27412	0.00105992	0.00887701	65086	ENSMUSG00000036832	Lpar3	lysophosphatidic acid receptor 3	NM_022983
ENSMUSG00000004791	137.202	6.18928	1.63118	3.79435	0.000148031	0.00182224	18654	ENSMUSG00000004791	Pgf	placental growth factor	NM_001271705
ENSMUSG00000036395	14.9012	6.09581	1.64352	3.709	0.00020808	0.00243105	244757	ENSMUSG00000036395	Glb1l2	galactosidase, beta 1-like 2	NM_001310768
ENSMUSG00000051379	37.6466	6.05689	1.46466	4.13535	3.54408e-05	0.000557944	71436	ENSMUSG00000051379	Flrt3	fibronectin leucine rich transmembrane protein 3	NM_001172160
ENSMUSG00000050921	73.2822	5.93228	1.63577	3.6266	0.00028718	0.00316369	78826	ENSMUSG00000050921	P2ry10	purinergic receptor P2Y, G-protein coupled 10	NM_001357810
ENSMUSG00000042523	72.2186	5.9318	1.30468	4.54656	5.45298e-06	0.000116945	105000	ENSMUSG00000042523	Dnal1	dynein, axonemal, light chain 1	NM_001346528
ENSMUSG00000025383	8.03762	5.84972	1.61323	3.6261	0.000287733	0.00316731	83430	ENSMUSG00000025383	Il23a	interleukin 23, alpha subunit p19	NM_031252
ENSMUSG00000027603	4.80436	5.78133	1.7886	3.23232	0.00122788	0.00992586	207182	ENSMUSG00000027603	Ggt7	gamma-glutamyltransferase 7	NM_001362898
ENSMUSG00000001604	137.216	5.734	1.20561	4.7561	1.97371e-06	4.97489e-05	21401	ENSMUSG00000001604	Tcea3	transcription elongation factor A (SII), 3	NM_011542
ENSMUSG00000051359	9.44675	5.69863	1.58397	3.59769	0.000321061	0.00345324	52589	ENSMUSG00000051359	Ncald	neurocalcin delta	NM_001170866
ENSMUSG00000037071	25.3845	5.634	1.57446	3.57836	0.000345752	0.00365464	20249	ENSMUSG00000037071	Scd1	stearoyl-Coenzyme A desaturase 1	NM_009127
ENSMUSG00000035640	192.263	5.56822	0.706626	7.88001	3.27345e-15	6.88401e-13	100503659	ENSMUSG00000035640	Cbarp	calcium channel, voltage-dependent, beta subunit associated regulatory protein	NM_001195268
ENSMUSG00000002006	7.12318	5.5531	1.37262	4.04562	5.21852e-05	0.00076857	245469	ENSMUSG00000002006	Pdzd4	PDZ domain containing 4	NM_001029868
ENSMUSG00000033083	438.834	5.54868	0.630169	8.80508	1.30764e-18	5.11796e-16	210789	ENSMUSG00000033083	Tbc1d4	TBC1 domain family, member 4	NM_001081278
ENSMUSG00000045790	7.69463	5.54174	1.61171	3.43842	0.000585117	0.00549758	100503884	ENSMUSG00000045790	Ccdc149	coiled-coil domain containing 149	NM_001256059
ENSMUSG00000032281	6.10854	5.45113	1.51385	3.60085	0.000317184	0.00342462	94180	ENSMUSG00000032281	Acsbg1	acyl-CoA synthetase bubblegum family member 1	NM_053178
ENSMUSG00000022505	32.7153	5.44767	1.03476	5.26469	1.40426e-07	5.08639e-06	13731	ENSMUSG00000022505	Emp2	epithelial membrane protein 2	NM_007929
ENSMUSG00000068115	159.512	5.40606	0.852558	6.34098	2.28301e-10	1.71105e-08	78177	ENSMUSG00000068115	Ninl	ninein-like	NM_207204
ENSMUSG00000027954	8.34698	5.34803	1.38577	3.85925	0.000113737	0.00147294	13636	ENSMUSG00000027954	Efna1	ephrin A1	NM_001162425
ENSMUSG00000021411	557.3	5.33652	0.854265	6.24692	4.18632e-10	2.99417e-08	66895	ENSMUSG00000021411	Pxdc1	PX domain containing 1	NM_025831
ENSMUSG00000021782	22.275	5.33042	1.41047	3.77918	0.000157348	0.00191289	71228	ENSMUSG00000021782	Dlg5	discs large MAGUK scaffold protein 5	NM_001163513
ENSMUSG00000000531	243.319	5.3294	1.22637	4.34566	1.38857e-05	0.000257028	56149	ENSMUSG00000000531	Grasp	GRP1 (general receptor for phosphoinositides 1)-associated scaffold protein	NM_019518
ENSMUSG00000034634	51.4176	5.29199	1.48075	3.57386	0.000351762	0.00370428	17068	ENSMUSG00000034634	Ly6d	lymphocyte antigen 6 complex, locus D	NM_010742
ENSMUSG00000026558	159.679	5.27854	1.33699	3.94809	7.87763e-05	0.00108289	80914	ENSMUSG00000026558	Uck2	uridine-cytidine kinase 2	NM_030724
ENSMUSG00000022240	47.2416	5.25737	1.08673	4.83777	1.31304e-06	3.51057e-05	18163	ENSMUSG00000022240	Ctnnd2	catenin (cadherin associated protein), delta 2	NM_001355502
ENSMUSG00000032216	74.3575	5.21936	1.22941	4.24543	2.18179e-05	0.000371722	17999	ENSMUSG00000032216	Nedd4	neural precursor cell expressed, developmentally down-regulated 4	NM_001039251
ENSMUSG00000052632	14.5393	5.21737	0.908633	5.742	9.35668e-09	4.72529e-07	211914	ENSMUSG00000052632	Asap2	ArfGAP with SH3 domain, ankyrin repeat and PH domain 2	NM_001004364
ENSMUSG00000020601	7.93802	5.17799	1.55933	3.32065	0.00089808	0.00773468	217410	ENSMUSG00000020601	Trib2	tribbles pseudokinase 2	NM_144551
ENSMUSG00000042417	9.41562	5.16789	1.33994	3.85682	0.000114873	0.00148356	218630	ENSMUSG00000042417	Ccno	cyclin O	NM_001081062
ENSMUSG00000045659	10.5735	5.14802	1.26114	4.08203	4.46445e-05	0.000681517	233765	ENSMUSG00000045659	Plekha7	pleckstrin homology domain containing, family A member 7	NM_001305185
ENSMUSG00000042842	43.7602	5.1338	1.26737	4.05075	5.1054e-05	0.000755621	20708	ENSMUSG00000042842	Serpinb6b	serine (or cysteine) peptidase inhibitor, clade B, member 6b	NM_011454
ENSMUSG00000026080	16.4837	5.12431	1.4748	3.47458	0.000511645	0.00500649	98388	ENSMUSG00000026080	Chst10	carbohydrate sulfotransferase 10	NM_001368780
ENSMUSG00000047586	14.8669	5.05168	1.38516	3.64699	0.000265329	0.00297413	233038	ENSMUSG00000047586	Nccrp1	non-specific cytotoxic cell receptor protein 1 homolog (zebrafish)	NM_001081115
ENSMUSG00000031995	73.851	5.04752	1.18386	4.26362	2.01142e-05	0.000349027	19143	ENSMUSG00000031995	St14	suppression of tumorigenicity 14 (colon carcinoma)	NM_011176
ENSMUSG00000027002	29.1272	5.04107	1.07978	4.6686	3.0326e-06	7.21803e-05	50884	ENSMUSG00000027002	Nckap1	NCK-associated protein 1	NM_001290745
ENSMUSG00000021280	54.8431	5.01834	0.919529	5.45752	4.8284e-08	2.03081e-06	74190	ENSMUSG00000021280	Exoc3l4	exocyst complex component 3-like 4	NM_001289487
ENSMUSG00000001588	54.7189	4.96966	1.26893	3.91642	8.98752e-05	0.00121881	216859	ENSMUSG00000001588	Acap1	ArfGAP with coiled-coil, ankyrin repeat and PH domains 1	NM_153788
ENSMUSG00000020099	26.098	4.92063	1.43664	3.4251	0.000614566	0.00570829	107449	ENSMUSG00000020099	Unc5b	unc-5 netrin receptor B	NM_001359273
ENSMUSG00000032258	15.3982	4.8881	1.06262	4.60005	4.22398e-06	9.41706e-05	75782	ENSMUSG00000032258	Lca5	Leber congenital amaurosis 5 (human)	NM_027448
ENSMUSG00000028341	348.532	4.69415	1.32614	3.53971	0.000400573	0.00413183	18124	ENSMUSG00000028341	Nr4a3	nuclear receptor subfamily 4, group A, member 3	NM_001307989
ENSMUSG00000032688	239.88	4.68728	0.666592	7.03171	2.04023e-12	2.33714e-10	240354	ENSMUSG00000032688	Malt1	MALT1 paracaspase	NM_001365019
ENSMUSG00000028214	20.6109	4.66609	1.03603	4.50382	6.67443e-06	0.000137289	14579	ENSMUSG00000028214	Gem	GTP binding protein (gene overexpressed in skeletal muscle)	NM_010276
ENSMUSG00000027368	1259.44	4.6579	1.0773	4.32368	1.53444e-05	0.000280056	13537	ENSMUSG00000027368	Dusp2	dual specificity phosphatase 2	NM_010090
ENSMUSG00000021281	1589.13	4.6452	0.933916	4.9739	6.56197e-07	1.89853e-05	21928	ENSMUSG00000021281	Tnfaip2	tumor necrosis factor, alpha-induced protein 2	NM_009396
ENSMUSG00000032012	81.9563	4.56291	1.34777	3.38552	0.000710441	0.00640853	58235	ENSMUSG00000032012	Nectin1	nectin cell adhesion molecule 1	NM_021424
ENSMUSG00000024664	106.606	4.55198	0.577519	7.88197	3.22263e-15	6.87983e-13	60527	ENSMUSG00000024664	Fads3	fatty acid desaturase 3	NM_021890
ENSMUSG00000040511	375.354	4.49295	0.595394	7.54617	4.4824e-14	7.43024e-12	52118	ENSMUSG00000040511	Pvr	poliovirus receptor	NM_027514
ENSMUSG00000024590	167.075	4.40323	0.809707	5.43805	5.38662e-08	2.22573e-06	16906	ENSMUSG00000024590	Lmnb1	lamin B1	NM_010721
ENSMUSG00000063889	234.372	4.35272	0.842252	5.16795	2.36679e-07	7.7326e-06	12916	ENSMUSG00000063889	Crem	cAMP responsive element modulator	NM_001110850
ENSMUSG00000046056	76.5378	4.30247	1.0243	4.20038	2.6647e-05	0.000442234	282619	ENSMUSG00000046056	Sbsn	suprabasin	NM_001083903
ENSMUSG00000027952	328.877	4.27647	0.59774	7.1544	8.40425e-13	1.09644e-10	68603	ENSMUSG00000027952	Pmvk	phosphomevalonate kinase	NM_001310640
ENSMUSG00000048911	38.9936	4.24738	0.745604	5.69656	1.22248e-08	6.02264e-07	51902	ENSMUSG00000048911	Rnf24	ring finger protein 24	NM_178607
ENSMUSG00000092279	12.9047	4.14161	0.791957	5.22959	1.69885e-07	5.88127e-06	#N/A	ENSMUSG00000092279	#N/A	#N/A	#N/A
ENSMUSG00000038552	76.1864	4.1407	1.15235	3.59326	0.000326573	0.00350183	64339	ENSMUSG00000038552	Fndc4	fibronectin type III domain containing 4	NM_001356945
ENSMUSG00000018500	44.6138	4.13606	1.15444	3.58275	0.000339993	0.00361275	11541	ENSMUSG00000018500	Adora2b	adenosine A2b receptor	NM_007413
ENSMUSG00000021298	337.139	4.12807	1.10592	3.73272	0.000189427	0.00224476	56696	ENSMUSG00000021298	Gpr132	G protein-coupled receptor 132	NM_019925
ENSMUSG00000026153	29.6445	4.08317	0.827716	4.93305	8.09535e-07	2.28584e-05	68187	ENSMUSG00000026153	Fam135a	family with sequence similarity 135, member A	NM_026604
ENSMUSG00000042659	182.685	4.07202	0.641227	6.35035	2.14826e-10	1.63616e-08	66412	ENSMUSG00000042659	Arrdc4	arrestin domain containing 4	NM_001042592
ENSMUSG00000057176	23.2245	4.05861	0.979328	4.14428	3.40881e-05	0.000541489	233899	ENSMUSG00000057176	Ccdc189	coiled-coil domain containing 189	NM_001033040
ENSMUSG00000029101	52.8085	4.04796	0.861549	4.69846	2.62128e-06	6.33513e-05	71729	ENSMUSG00000029101	Rgs12	regulator of G-protein signaling 12	NM_001163512
ENSMUSG00000042215	10.1035	4.02322	0.925691	4.34618	1.3853e-05	0.000257028	213539	ENSMUSG00000042215	Bag2	BCL2-associated athanogene 2	NM_145392
ENSMUSG00000019437	24.3349	4.01941	0.826018	4.86601	1.13872e-06	3.1034e-05	68385	ENSMUSG00000019437	Tlcd1	TLC domain containing 1	NM_001291235
ENSMUSG00000027583	15.6185	3.97669	1.22421	3.24836	0.00116072	0.0094909	72147	ENSMUSG00000027583	Zbtb46	zinc finger and BTB domain containing 46	NM_027656
ENSMUSG00000026708	45.0311	3.97625	0.383509	10.3681	3.46441e-25	3.48668e-22	70454	ENSMUSG00000026708	Cenpl	centromere protein L	NM_001159930
ENSMUSG00000047281	73.6065	3.89939	1.15786	3.36777	0.0007578	0.00672804	55948	ENSMUSG00000047281	Sfn	stratifin	NM_018754
ENSMUSG00000000392	8.53933	3.8736	0.959256	4.03812	5.38805e-05	0.000785084	14089	ENSMUSG00000000392	Fap	fibroblast activation protein	NM_007986
ENSMUSG00000023947	766.373	3.86864	0.591086	6.54496	5.95099e-11	5.20804e-09	18037	ENSMUSG00000023947	Nfkbie	nuclear factor of kappa light polypeptide gene enhancer in B cells inhibitor, epsilon	NM_001304956
ENSMUSG00000058317	13.8447	3.85926	1.04521	3.69233	0.000222209	0.00256151	218793	ENSMUSG00000058317	Ube2e2	ubiquitin-conjugating enzyme E2E 2	NM_001360327
ENSMUSG00000053687	494.793	3.8425	1.06406	3.61117	0.00030482	0.00332167	319446	ENSMUSG00000053687	Dpep2	dipeptidase 2	NM_001301204
ENSMUSG00000022265	209.979	3.83872	0.738422	5.19854	2.00857e-07	6.67471e-06	11732	ENSMUSG00000022265	Ank	progressive ankylosis	NM_020332
ENSMUSG00000073758	39.6695	3.83619	1.0745	3.57021	0.000356702	0.0037479	66938	ENSMUSG00000073758	Sh3d21	SH3 domain containing 21	NM_001162533
ENSMUSG00000029821	31.1565	3.83545	0.884328	4.33714	1.4435e-05	0.000265868	54722	ENSMUSG00000029821	Gsdme	gasdermin E	NM_018769
ENSMUSG00000035310	56.0367	3.8232	0.51755	7.38711	1.50056e-13	2.27344e-11	231506	ENSMUSG00000035310	Lin54	lin-54 homolog (C. elegans)	NM_001115010
ENSMUSG00000022010	246.792	3.72425	0.709837	5.24664	1.54901e-07	5.47005e-06	21807	ENSMUSG00000022010	Tsc22d1	TSC22 domain family, member 1	NM_001177751
ENSMUSG00000029070	15.5222	3.7128	1.08316	3.42775	0.0006086	0.00567141	74761	ENSMUSG00000029070	Mxra8	matrix-remodelling associated 8	NM_024263
ENSMUSG00000021636	66.497	3.71136	0.877051	4.23164	2.31996e-05	0.000391007	218518	ENSMUSG00000021636	Marveld2	MARVEL (membrane-associating) domain containing 2	NM_001038602
ENSMUSG00000052949	38.725	3.70559	0.818504	4.52727	5.97504e-06	0.00012623	217340	ENSMUSG00000052949	Rnf157	ring finger protein 157	NM_027258
ENSMUSG00000026709	43.5068	3.59469	0.459982	7.81485	5.50294e-15	1.04779e-12	226539	ENSMUSG00000026709	Dars2	aspartyl-tRNA synthetase 2 (mitochondrial)	NM_172644
ENSMUSG00000017405	24.722	3.53982	0.677996	5.22101	1.77951e-07	6.11543e-06	140859	ENSMUSG00000017405	Nek8	NIMA (never in mitosis gene a)-related expressed kinase 8	NM_080849
ENSMUSG00000032515	822.648	3.50589	0.805029	4.35498	1.33078e-05	0.000248025	215418	ENSMUSG00000032515	Csrnp1	cysteine-serine-rich nuclear protein 1	NM_001357560
ENSMUSG00000030056	186.167	3.47982	0.531122	6.55184	5.68336e-11	5.03639e-09	57905	ENSMUSG00000030056	Isy1	ISY1 splicing factor homolog	NM_133934
ENSMUSG00000029312	26.7655	3.46133	0.650757	5.31892	1.04382e-07	3.98576e-06	246293	ENSMUSG00000029312	Klhl8	kelch-like 8	NM_001359986
ENSMUSG00000024232	27.2504	3.4611	0.769306	4.49899	6.82777e-06	0.000139425	68010	ENSMUSG00000024232	Bambi	BMP and activin membrane-bound inhibitor	NM_026505
ENSMUSG00000018736	374.552	3.44655	0.381863	9.0256	1.78712e-19	8.68295e-17	83431	ENSMUSG00000018736	Ndel1	nudE neurodevelopment protein 1 like 1	NM_001363304
ENSMUSG00000029752	17.8419	3.43033	0.931889	3.68105	0.000232275	0.00265216	27053	ENSMUSG00000029752	Asns	asparagine synthetase	NM_012055
ENSMUSG00000022529	267.862	3.42836	0.420159	8.15967	3.35939e-16	8.60615e-14	74120	ENSMUSG00000022529	Zfp263	zinc finger protein 263	NM_148924
ENSMUSG00000025723	24.648	3.40419	0.735019	4.63143	3.63143e-06	8.33336e-05	68039	ENSMUSG00000025723	Nmb	neuromedin B	NM_001291280
ENSMUSG00000037548	93.8847	3.40323	0.941002	3.6166	0.000298502	0.00326545	15000	ENSMUSG00000037548	H2-DMb2	histocompatibility 2, class II, locus Mb2	NM_010388
ENSMUSG00000037514	222.823	3.30082	0.458424	7.20036	6.00535e-13	8.1361e-11	74450	ENSMUSG00000037514	Pank2	pantothenate kinase 2	NM_001355679
ENSMUSG00000032849	78.0282	3.28705	0.887364	3.70428	0.00021199	0.00246855	239273	ENSMUSG00000032849	Abcc4	ATP-binding cassette, sub-family C (CFTR/MRP), member 4	NM_001033336
ENSMUSG00000030203	145.259	3.21284	0.637015	5.04359	4.56874e-07	1.36965e-05	70686	ENSMUSG00000030203	Dusp16	dual specificity phosphatase 16	NM_001048054
ENSMUSG00000053641	205.063	3.18696	0.648955	4.91091	9.06525e-07	2.54441e-05	102442	ENSMUSG00000053641	Dennd4a	DENN/MADD domain containing 4A	NM_001162917
ENSMUSG00000003378	13.3795	3.16803	0.857549	3.69428	0.000220508	0.00254668	14809	ENSMUSG00000003378	Grik5	glutamate receptor, ionotropic, kainate 5 (gamma 2)	NM_001360067
ENSMUSG00000048537	48.3882	3.15137	0.757166	4.16206	3.15393e-05	0.000507873	102693	ENSMUSG00000048537	Phldb1	pleckstrin homology like domain, family B, member 1	NM_153537
ENSMUSG00000022514	20.6961	3.15113	0.90119	3.49664	0.000471162	0.00470161	16180	ENSMUSG00000022514	Il1rap	interleukin 1 receptor accessory protein	NM_001159317
ENSMUSG00000001964	295.241	3.14682	0.463685	6.78656	1.14839e-11	1.14758e-09	13726	ENSMUSG00000001964	Emd	emerin	NM_007927
ENSMUSG00000018821	198.176	3.13404	0.92095	3.40305	0.000666372	0.00610083	69534	ENSMUSG00000018821	Avpi1	arginine vasopressin-induced 1	NM_027106
ENSMUSG00000001630	41.1755	3.10949	0.735597	4.22717	2.36648e-05	0.000398372	232533	ENSMUSG00000001630	Stk38l	serine/threonine kinase 38 like	NM_001346666
ENSMUSG00000029149	42.9114	3.10807	0.813372	3.82122	0.000132792	0.00167555	69815	ENSMUSG00000029149	Krtcap3	keratinocyte associated protein 3	NM_001363337
ENSMUSG00000054893	10.4662	3.1055	0.731328	4.24638	2.1725e-05	0.000371036	384763	ENSMUSG00000054893	Zfp667	zinc finger protein 667	NM_001024928
ENSMUSG00000045827	42.2248	3.10468	0.78732	3.94335	8.03498e-05	0.00110022	20723	ENSMUSG00000045827	Serpinb9	serine (or cysteine) peptidase inhibitor, clade B, member 9	NM_009256
ENSMUSG00000020400	373.176	3.09881	0.464263	6.67469	2.47762e-11	2.34294e-09	57783	ENSMUSG00000020400	Tnip1	TNFAIP3 interacting protein 1	NM_001199275
ENSMUSG00000038059	265.76	3.08058	0.905166	3.40333	0.000665701	0.00609865	106878	ENSMUSG00000038059	Smim3	small integral membrane protein 3	NM_134133
ENSMUSG00000021959	158.121	3.06692	0.424209	7.22972	4.83983e-13	6.81932e-11	50523	ENSMUSG00000021959	Lats2	large tumor suppressor 2	NM_015771
ENSMUSG00000018405	77.5557	3.0542	0.600029	5.09009	3.57893e-07	1.11073e-05	217038	ENSMUSG00000018405	Mrm1	mitochondrial rRNA methyltransferase 1	NM_145433
ENSMUSG00000030231	23.0574	3.05055	0.815025	3.74289	0.000181916	0.00216486	109135	ENSMUSG00000030231	Plekha5	pleckstrin homology domain containing, family A member 5	NM_144920
ENSMUSG00000085492	31.9394	3.0157	0.848329	3.55486	0.000378174	0.00392955	68789	ENSMUSG00000085492	Trmt61b	tRNA methyltransferase 61B	NR_015549
ENSMUSG00000031570	88.4552	3.00509	0.652741	4.6038	4.14853e-06	9.29297e-05	71910	ENSMUSG00000031570	Plpp5	phospholipid phosphatase 5	NM_001293703
ENSMUSG00000033760	34.1746	2.98011	0.691135	4.3119	1.61856e-05	0.000292379	66704	ENSMUSG00000033760	Rbm4b	RNA binding motif protein 4B	NM_025717
ENSMUSG00000024812	118.617	2.97422	0.646411	4.60113	4.20208e-06	9.38308e-05	21873	ENSMUSG00000024812	Tjp2	tight junction protein 2	NM_001198985
ENSMUSG00000042826	68.1241	2.96889	0.877164	3.38465	0.000712693	0.00642472	14166	ENSMUSG00000042826	Fgf11	fibroblast growth factor 11	NM_001291104
ENSMUSG00000031662	876.724	2.96395	0.55153	5.37405	7.69882e-08	3.03007e-06	71607	ENSMUSG00000031662	Snx20	sorting nexin 20	NM_027840
ENSMUSG00000068036	240.573	2.96134	0.862643	3.43286	0.000597243	0.00558034	17356	ENSMUSG00000068036	Afdn	afadin, adherens junction formation factor	NM_010806
ENSMUSG00000031652	464.778	2.95798	0.385898	7.66519	1.7857e-14	3.18488e-12	80750	ENSMUSG00000031652	N4bp1	NEDD4 binding protein 1	NM_030563
ENSMUSG00000029135	253.778	2.9459	0.848333	3.47258	0.000515483	0.00502641	14284	ENSMUSG00000029135	Fosl2	fos-like antigen 2	NM_008037
ENSMUSG00000066894	24.7145	2.94583	0.722199	4.07897	4.52366e-05	0.000689063	231668	ENSMUSG00000066894	Vsig10	V-set and immunoglobulin domain containing 10	NM_001033311
ENSMUSG00000032413	199.537	2.93953	0.789057	3.72537	0.000195032	0.00230924	114713	ENSMUSG00000032413	Rasa2	RAS p21 protein activator 2	NM_053268
ENSMUSG00000043154	53.5376	2.92263	0.899464	3.2493	0.00115689	0.00946606	235542	ENSMUSG00000043154	Ppp2r3a	protein phosphatase 2, regulatory subunit B'', alpha	NM_001161362
ENSMUSG00000021792	91.4193	2.9137	0.653818	4.45644	8.33334e-06	0.000165843	70564	ENSMUSG00000021792	Prxl2a	peroxiredoxin like 2A	NM_001316732
ENSMUSG00000079553	18.1899	2.89541	0.81159	3.56757	0.000360301	0.00377474	100502766	ENSMUSG00000079553	Kifc1	kinesin family member C1	NM_001195298
ENSMUSG00000078485	75.3864	2.87344	0.513783	5.5927	2.23563e-08	1.02606e-06	231002	ENSMUSG00000078485	Plekhn1	pleckstrin homology domain containing, family N member 1	NM_001008233
ENSMUSG00000027997	151.995	2.86486	0.452797	6.32704	2.49915e-10	1.86312e-08	12368	ENSMUSG00000027997	Casp6	caspase 6	NM_009811
ENSMUSG00000030060	138.695	2.85122	0.362712	7.86084	3.8157e-15	7.79176e-13	232210	ENSMUSG00000030060	Hmces	5-hydroxymethylcytosine (hmC) binding, ES cell specific	NM_173737
ENSMUSG00000022960	61.4193	2.84148	0.529229	5.3691	7.91304e-08	3.1057e-06	60364	ENSMUSG00000022960	Donson	downstream neighbor of SON	NM_021720
ENSMUSG00000030934	275.889	2.8343	0.514815	5.50547	3.68184e-08	1.58646e-06	18242	ENSMUSG00000030934	Oat	ornithine aminotransferase	NM_016978
ENSMUSG00000001627	700.75	2.80812	0.699157	4.01644	5.90847e-05	0.000854352	15982	ENSMUSG00000001627	Ifrd1	interferon-related developmental regulator 1	NM_013562
ENSMUSG00000085156	250.812	2.8016	0.722011	3.88027	0.000104339	0.001383	100041286	ENSMUSG00000085156	Snhg15	small nucleolar RNA host gene 15	NR_045893
ENSMUSG00000027333	394.487	2.80093	0.543792	5.15075	2.59453e-07	8.30838e-06	228608	ENSMUSG00000027333	Smox	spermine oxidase	NM_001177833
ENSMUSG00000051278	11.626	2.79672	0.61389	4.55573	5.22033e-06	0.000112297	71643	ENSMUSG00000051278	Zgrf1	zinc finger, GRF-type containing 1	NM_197997
ENSMUSG00000028603	272.774	2.76626	0.552168	5.00982	5.4481e-07	1.59925e-05	20280	ENSMUSG00000028603	Scp2	sterol carrier protein 2, liver	NM_011327
ENSMUSG00000024891	26.0416	2.76216	0.803112	3.43932	0.000583175	0.00549261	13340	ENSMUSG00000024891	Slc29a2	solute carrier family 29 (nucleoside transporters), member 2	NM_007854
ENSMUSG00000025758	18.9152	2.7605	0.709662	3.88989	0.000100291	0.00133944	20873	ENSMUSG00000025758	Plk4	polo like kinase 4	NM_011495
ENSMUSG00000024981	428.428	2.75589	0.43238	6.37378	1.84427e-10	1.45172e-08	433256	ENSMUSG00000024981	Acsl5	acyl-CoA synthetase long-chain family member 5	NM_027976
ENSMUSG00000022066	168.461	2.74526	0.458571	5.98656	2.14325e-09	1.21768e-07	100862375	ENSMUSG00000022066	Entpd4b	ectonucleoside triphosphate diphosphohydrolase 4B	NM_001359159
ENSMUSG00000078851	340.134	2.72928	0.50494	5.40515	6.47554e-08	2.6294e-06	319162	ENSMUSG00000078851	H2aw	H2A.W histone	NM_178218
ENSMUSG00000050821	53.4751	2.68771	0.650448	4.13208	3.5949e-05	0.000565314	78408	ENSMUSG00000050821	Fam131a	family with sequence similarity 131, member A	NM_133778
ENSMUSG00000037905	164.415	2.68442	0.773766	3.46929	0.00052184	0.00507435	76809	ENSMUSG00000037905	Bri3bp	Bri3 binding protein	NM_001359486
ENSMUSG00000024098	21.7268	2.68263	0.692553	3.87354	0.000107266	0.00141382	65960	ENSMUSG00000024098	Twsg1	twisted gastrulation BMP signaling modulator 1	NM_023053
ENSMUSG00000017929	211.972	2.68127	0.66188	4.05099	5.10015e-05	0.000755621	56336	ENSMUSG00000017929	B4galt5	UDP-Gal:betaGlcNAc beta 1,4-galactosyltransferase, polypeptide 5	NM_019835
ENSMUSG00000030774	507.299	2.66277	0.589085	4.52018	6.17865e-06	0.000129597	18479	ENSMUSG00000030774	Pak1	p21 (RAC1) activated kinase 1	NM_001357362
ENSMUSG00000058748	12.3869	2.65043	0.751205	3.52824	0.000418327	0.00426809	233987	ENSMUSG00000058748	Zfp958	zinc finger protein 958	NM_001368404
ENSMUSG00000026617	37.8973	2.63845	0.613357	4.30165	1.69532e-05	0.000304294	23827	ENSMUSG00000026617	Bpnt1	bisphosphate 3'-nucleotidase 1	NM_001347210
ENSMUSG00000039234	59.5781	2.62968	0.570867	4.60646	4.09586e-06	9.22608e-05	69608	ENSMUSG00000039234	Sec24d	Sec24 related gene family, member D (S. cerevisiae)	NM_027135
ENSMUSG00000047881	121.018	2.62556	0.788597	3.3294	0.000870326	0.00753249	100532	ENSMUSG00000047881	Rell1	RELT-like 1	NM_145923
ENSMUSG00000060466	47.615	2.60454	0.564917	4.61047	4.01751e-06	9.10077e-05	#N/A	ENSMUSG00000060466	#N/A	#N/A	#N/A
ENSMUSG00000031529	66.4034	2.59909	0.716408	3.62794	0.00028569	0.00314974	21951	ENSMUSG00000031529	Tnks	tankyrase, TRF1-interacting ankyrin-related ADP-ribose polymerase	NM_175091
ENSMUSG00000032119	14.5758	2.57428	0.600177	4.2892	1.79314e-05	0.000316213	102423	ENSMUSG00000032119	Hinfp	histone H4 transcription factor	NM_172162
ENSMUSG00000029310	464.069	2.56651	0.258214	9.93945	2.80364e-23	2.32373e-20	74167	ENSMUSG00000029310	Nudt9	nudix (nucleoside diphosphate linked moiety X)-type motif 9	NM_028794
ENSMUSG00000037815	389.319	2.54935	0.389708	6.54168	6.08311e-11	5.29081e-09	12385	ENSMUSG00000037815	Ctnna1	catenin (cadherin associated protein), alpha 1	NM_009818
ENSMUSG00000027455	173.728	2.53468	0.415663	6.09794	1.07447e-09	6.75511e-08	386649	ENSMUSG00000027455	Nsfl1c	NSFL1 (p97) cofactor (p47)	NM_001291074
ENSMUSG00000025225	374.943	2.51686	0.480318	5.23998	1.60593e-07	5.64278e-06	18034	ENSMUSG00000025225	Nfkb2	nuclear factor of kappa light polypeptide gene enhancer in B cells 2, p49/p100	NM_001177369
ENSMUSG00000063550	27.2314	2.51516	0.471849	5.33043	9.79791e-08	3.76165e-06	269966	ENSMUSG00000063550	Nup98	nucleoporin 98	NM_001287164
ENSMUSG00000085650	37.6204	2.51368	0.472576	5.31909	1.04285e-07	3.98576e-06	#N/A	ENSMUSG00000085650	#N/A	#N/A	#N/A
ENSMUSG00000031776	91.1216	2.50982	0.517949	4.8457	1.26168e-06	3.4121e-05	107566	ENSMUSG00000031776	Arl2bp	ADP-ribosylation factor-like 2 binding protein	NM_024191
ENSMUSG00000032349	150.172	2.49333	0.590925	4.21936	2.44994e-05	0.000409972	68801	ENSMUSG00000032349	Elovl5	ELOVL family member 5, elongation of long chain fatty acids (yeast)	NM_134255
ENSMUSG00000028159	353.164	2.46825	0.349635	7.05949	1.6711e-12	1.97863e-10	26377	ENSMUSG00000028159	Dapp1	dual adaptor for phosphotyrosine and 3-phosphoinositides 1	NM_001310753
ENSMUSG00000038497	77.9198	2.46491	0.617323	3.99291	6.52678e-05	0.000927975	234076	ENSMUSG00000038497	Tmco3	transmembrane and coiled-coil domains 3	NM_001364217
ENSMUSG00000064145	195.691	2.46257	0.454554	5.41755	6.04216e-08	2.46765e-06	23807	ENSMUSG00000064145	Arih2	ariadne RBR E3 ubiquitin protein ligase 2	NM_001357283
ENSMUSG00000025340	88.2876	2.45875	0.675241	3.64129	0.000271272	0.0030287	56715	ENSMUSG00000025340	Rabgef1	RAB guanine nucleotide exchange factor (GEF) 1	NM_001199059
ENSMUSG00000018541	119.11	2.45188	0.393945	6.22392	4.84875e-10	3.33263e-08	67480	ENSMUSG00000018541	Cwc25	CWC25 spliceosome-associated protein	NM_026186
ENSMUSG00000044340	34.8046	2.44016	0.680278	3.587	0.0003345	0.003562	98432	ENSMUSG00000044340	Phlpp1	PH domain and leucine rich repeat protein phosphatase 1	NM_133821
ENSMUSG00000065663	14.1485	2.4368	0.503361	4.84106	1.2915e-06	3.47084e-05	115487276	ENSMUSG00000065663	LOC115487276	small nucleolar RNA SNORA25	XR_003948464
ENSMUSG00000019876	207.141	2.42893	0.729764	3.32838	0.000873518	0.00755084	18768	ENSMUSG00000019876	Pkib	protein kinase inhibitor beta, cAMP dependent, testis specific	NM_001039050
ENSMUSG00000049866	746.55	2.42549	0.693483	3.49754	0.000469563	0.00468898	320982	ENSMUSG00000049866	Arl4c	ADP-ribosylation factor-like 4C	NM_177305
ENSMUSG00000042507	166.073	2.4186	0.533294	4.53522	5.75447e-06	0.000122849	238317	ENSMUSG00000042507	Elmsan1	ELM2 and Myb/SANT-like domain containing 1	NM_001163501
ENSMUSG00000029463	32.7011	2.41424	0.600714	4.01895	5.84578e-05	0.000847397	68948	ENSMUSG00000029463	Fam216a	family with sequence similarity 216, member A	NM_026883
ENSMUSG00000017418	30.2112	2.41265	0.513024	4.7028	2.56614e-06	6.23003e-05	75869	ENSMUSG00000017418	Arl5b	ADP-ribosylation factor-like 5B	NM_029466
ENSMUSG00000085037	25.9529	2.40001	0.711868	3.37143	0.000747791	0.00665548	100504166	ENSMUSG00000085037	4933421O10Rik	RIKEN cDNA 4933421O10 gene	NR_036602
ENSMUSG00000049755	30.6456	2.39886	0.566241	4.23646	2.2707e-05	0.000383623	319475	ENSMUSG00000049755	Zfp672	zinc finger protein 672	NM_001256516
ENSMUSG00000001687	800.605	2.38056	0.321008	7.41588	1.20816e-13	1.87066e-11	24109	ENSMUSG00000001687	Ubl3	ubiquitin-like 3	NM_001359199
ENSMUSG00000019850	641.721	2.37542	0.723598	3.28279	0.00102786	0.00866069	21929	ENSMUSG00000019850	Tnfaip3	tumor necrosis factor, alpha-induced protein 3	NM_001166402
ENSMUSG00000035232	73.1735	2.37345	0.556471	4.26519	1.99736e-05	0.000347013	236900	ENSMUSG00000035232	Pdk3	pyruvate dehydrogenase kinase, isoenzyme 3	NM_145630
ENSMUSG00000039789	25.0839	2.37224	0.600523	3.95029	7.80576e-05	0.00107405	71063	ENSMUSG00000039789	Zfp597	zinc finger protein 597	NM_001033159
ENSMUSG00000029009	104.928	2.36462	0.437918	5.3997	6.67525e-08	2.68726e-06	17769	ENSMUSG00000029009	Mthfr	methylenetetrahydrofolate reductase	NM_001161798
ENSMUSG00000041313	32.2849	2.36427	0.706802	3.34503	0.000822726	0.00717406	11987	ENSMUSG00000041313	Slc7a1	solute carrier family 7 (cationic amino acid transporter, y+ system), member 1	NM_001301424
ENSMUSG00000032018	50.4114	2.36182	0.63231	3.73522	0.000187552	0.00222442	235293	ENSMUSG00000032018	Sc5d	sterol-C5-desaturase	NM_172769
ENSMUSG00000034300	108.471	2.3562	0.46517	5.06524	4.07892e-07	1.2413e-05	66306	ENSMUSG00000034300	Fam53c	family with sequence similarity 53, member C	NM_001357456
ENSMUSG00000051341	35.1825	2.35363	0.552963	4.25639	2.0775e-05	0.000359166	22710	ENSMUSG00000051341	Zfp52	zinc finger protein 52	NM_144515
ENSMUSG00000014075	69.5341	2.3485	0.597501	3.93054	8.47556e-05	0.0011583	66061	ENSMUSG00000014075	Tctex1d2	Tctex1 domain containing 2	NM_001347183
ENSMUSG00000050212	274.053	2.34322	0.414936	5.64718	1.63098e-08	7.81651e-07	230752	ENSMUSG00000050212	Eva1b	eva-1 homolog B (C. elegans)	NM_172145
ENSMUSG00000003948	104.192	2.31151	0.58129	3.97652	6.99315e-05	0.000981409	67468	ENSMUSG00000003948	Mmd	monocyte to macrophage differentiation-associated	NM_026178
ENSMUSG00000002983	158.977	2.31057	0.442247	5.22461	1.74522e-07	6.02701e-06	19698	ENSMUSG00000002983	Relb	avian reticuloendotheliosis viral (v-rel) oncogene related B	NM_001290457
ENSMUSG00000038375	157.122	2.30271	0.706529	3.25919	0.00111729	0.00923866	68728	ENSMUSG00000038375	Trp53inp2	transformation related protein 53 inducible nuclear protein 2	NM_178111
ENSMUSG00000026074	283.561	2.28225	0.52257	4.36736	1.25757e-05	0.000236887	26921	ENSMUSG00000026074	Map4k4	mitogen-activated protein kinase kinase kinase kinase 4	NM_001252200
ENSMUSG00000084796	317.708	2.27991	0.483541	4.71504	2.4166e-06	5.88081e-05	#N/A	ENSMUSG00000084796	#N/A	#N/A	#N/A
ENSMUSG00000023495	24.0295	2.27888	0.663083	3.43679	0.000588652	0.00551002	59092	ENSMUSG00000023495	Pcbp4	poly(rC) binding protein 4	NM_021567
ENSMUSG00000024789	113.333	2.27258	0.584948	3.88509	0.000102292	0.001361	16452	ENSMUSG00000024789	Jak2	Janus kinase 2	NM_001048177
ENSMUSG00000020437	854.75	2.259	0.497095	4.54439	5.50943e-06	0.000117976	246177	ENSMUSG00000020437	Myo1g	myosin IG	NM_178440
ENSMUSG00000037351	219.786	2.24072	0.494874	4.52786	5.95836e-06	0.00012623	226977	ENSMUSG00000037351	Actr1b	ARP1 actin-related protein 1B, centractin beta	NM_146107
ENSMUSG00000042992	65.7724	2.22955	0.444037	5.02109	5.13785e-07	1.52085e-05	67774	ENSMUSG00000042992	Borcs5	BLOC-1 related complex subunit 5	NM_001170479
ENSMUSG00000025190	305.587	2.21496	0.643098	3.4442	0.000572746	0.00543068	14718	ENSMUSG00000025190	Got1	glutamic-oxaloacetic transaminase 1, soluble	NM_010324
ENSMUSG00000036093	40.384	2.20312	0.612244	3.59843	0.000320142	0.00344862	75423	ENSMUSG00000036093	Arl5a	ADP-ribosylation factor-like 5A	NM_182994
ENSMUSG00000020876	161.278	2.19596	0.498397	4.40605	1.05272e-05	0.000202911	74479	ENSMUSG00000020876	Snx11	sorting nexin 11	NM_001163389
ENSMUSG00000023169	167.432	2.19351	0.655758	3.34499	0.000822847	0.00717406	105727	ENSMUSG00000023169	Slc38a1	solute carrier family 38, member 1	NM_001166456
ENSMUSG00000007867	40.6335	2.18036	0.627471	3.47484	0.000511149	0.00500649	76411	ENSMUSG00000007867	Ift43	intraflagellar transport 43	NM_001199843
ENSMUSG00000022463	277.369	2.17553	0.538361	4.04101	5.32208e-05	0.000778074	20788	ENSMUSG00000022463	Srebf2	sterol regulatory element binding factor 2	NM_033218
ENSMUSG00000030161	407.624	2.16388	0.403669	5.36055	8.29711e-08	3.22946e-06	57436	ENSMUSG00000030161	Gabarapl1	gamma-aminobutyric acid (GABA) A receptor-associated protein-like 1	NM_020590
ENSMUSG00000085148	102.41	2.16192	0.581165	3.71997	0.000199243	0.00234531	100042498	ENSMUSG00000085148	Mir22hg	Mir22 host gene (non-protein coding)	NR_030711
ENSMUSG00000022426	68.9311	2.14427	0.566138	3.78754	0.000152145	0.00185854	74158	ENSMUSG00000022426	Josd1	Josephin domain containing 1	NM_028792
ENSMUSG00000071713	1327.4	2.13694	0.657914	3.24806	0.00116195	0.0094909	12983	ENSMUSG00000071713	Csf2rb	colony stimulating factor 2 receptor, beta, low-affinity (granulocyte-macrophage)	NM_001358854
ENSMUSG00000021115	191.942	2.13538	0.603373	3.53908	0.000401531	0.00413868	22367	ENSMUSG00000021115	Vrk1	vaccinia related kinase 1	NM_001029843
ENSMUSG00000015467	87.392	2.12564	0.627701	3.38638	0.000708201	0.0063965	81701	ENSMUSG00000015467	Egfl8	EGF-like domain 8	NM_152922
ENSMUSG00000084877	70.5748	2.11675	0.450263	4.70113	2.5873e-06	6.26375e-05	#N/A	ENSMUSG00000084877	#N/A	#N/A	#N/A
ENSMUSG00000025486	84.9812	2.11561	0.594705	3.55741	0.000374526	0.0038974	64384	ENSMUSG00000025486	Sirt3	sirtuin 3	NM_001127351
ENSMUSG00000046207	205.019	2.10719	0.568759	3.70488	0.000211489	0.00246475	104709	ENSMUSG00000046207	Pik3r6	phosphoinositide-3-kinase regulatory subunit 5	NM_001004435
ENSMUSG00000028945	399.116	2.10154	0.406489	5.16998	2.34121e-07	7.68892e-06	19744	ENSMUSG00000028945	Rheb	Ras homolog enriched in brain	NM_053075
ENSMUSG00000061589	255.864	2.10118	0.504325	4.16633	3.09547e-05	0.000501323	208266	ENSMUSG00000061589	Dot1l	DOT1-like, histone H3 methyltransferase (S. cerevisiae)	NM_199322
ENSMUSG00000012296	95.7682	2.09394	0.541048	3.87016	0.000108766	0.00142559	74094	ENSMUSG00000012296	Tjap1	tight junction associated protein 1	NM_001252473
ENSMUSG00000041153	46.1051	2.08917	0.620418	3.36735	0.000758933	0.00673386	209212	ENSMUSG00000041153	Osgin2	oxidative stress induced growth inhibitor family member 2	NM_001355615
ENSMUSG00000036712	98.311	2.08619	0.427176	4.88369	1.0412e-06	2.87998e-05	74256	ENSMUSG00000036712	Cyld	CYLD lysine 63 deubiquitinase	NM_001128169
ENSMUSG00000002845	73.6635	2.07257	0.636999	3.25365	0.00113931	0.00936028	67846	ENSMUSG00000002845	Tmem39a	transmembrane protein 39a	NM_001205286
ENSMUSG00000023571	80.0499	2.07152	0.616989	3.35747	0.000786583	0.00692252	67389	ENSMUSG00000023571	C1qtnf12	C1q and tumor necrosis factor related 12	NM_026125
ENSMUSG00000026360	3719.51	2.06883	0.557163	3.71315	0.000204695	0.00239947	19735	ENSMUSG00000026360	Rgs2	regulator of G-protein signaling 2	NM_009061
ENSMUSG00000024135	57.6385	2.06708	0.395265	5.22962	1.69858e-07	5.88127e-06	78586	ENSMUSG00000024135	Srbd1	S1 RNA binding domain 1	NM_030133
ENSMUSG00000024603	160.604	2.06646	0.445972	4.6336	3.59357e-06	8.25994e-05	67665	ENSMUSG00000024603	Dctn4	dynactin 4	NM_001357462
ENSMUSG00000029475	98.4672	2.04633	0.611559	3.34609	0.000819593	0.00716381	30841	ENSMUSG00000029475	Kdm2b	lysine (K)-specific demethylase 2B	NM_001003953
ENSMUSG00000079065	72.38	2.03847	0.496625	4.10465	4.04926e-05	0.000629736	100042165	ENSMUSG00000079065	BC005561	cDNA sequence BC005561	NM_001166581
ENSMUSG00000030960	21.9992	2.03384	0.448852	4.5312	5.86493e-06	0.000124641	72096	ENSMUSG00000030960	Eef1akmt2	EEF1A lysine methyltransferase 2	NM_001347629
ENSMUSG00000052087	125.816	2.02979	0.472794	4.29317	1.76141e-05	0.000311787	51791	ENSMUSG00000052087	Rgs14	regulator of G-protein signaling 14	NM_001360714
ENSMUSG00000006095	753.722	2.02866	0.285491	7.10587	1.19569e-12	1.46498e-10	66411	ENSMUSG00000006095	Tbcb	tubulin folding cofactor B	NM_001360648
ENSMUSG00000053332	736.524	2.01216	0.384258	5.23648	1.63665e-07	5.72219e-06	14455	ENSMUSG00000053332	Gas5	growth arrest specific 5	NR_002840
ENSMUSG00000022462	538.181	2.01114	0.437714	4.59464	4.3349e-06	9.60359e-05	67760	ENSMUSG00000022462	Slc38a2	solute carrier family 38, member 2	NM_001355633
ENSMUSG00000031604	115.296	2.00247	0.617666	3.24199	0.00118697	0.00964305	66234	ENSMUSG00000031604	Msmo1	methylsterol monoxygenase 1	NM_025436
ENSMUSG00000026655	129.336	1.99497	0.578495	3.44855	0.000563604	0.00536438	66540	ENSMUSG00000026655	Fam107b	family with sequence similarity 107, member B	NM_025626
ENSMUSG00000022450	1326.45	1.99039	0.312608	6.36706	1.92681e-10	1.49993e-08	67130	ENSMUSG00000022450	Ndufa6	NADH:ubiquinone oxidoreductase subunit A6	NM_025987
ENSMUSG00000017774	777.778	1.98566	0.471435	4.21195	2.53177e-05	0.000423164	17913	ENSMUSG00000017774	Myo1c	myosin IC	NM_001080774
ENSMUSG00000024948	149.588	1.98306	0.583909	3.39618	0.000683333	0.00621975	26412	ENSMUSG00000024948	Map4k2	mitogen-activated protein kinase kinase kinase kinase 2	NM_001291787
ENSMUSG00000021670	40.259	1.98285	0.583803	3.39644	0.000682693	0.00621794	15357	ENSMUSG00000021670	Hmgcr	3-hydroxy-3-methylglutaryl-Coenzyme A reductase	NM_001360165
ENSMUSG00000024507	469.003	1.98077	0.376901	5.25541	1.47698e-07	5.32242e-06	15488	ENSMUSG00000024507	Hsd17b4	hydroxysteroid (17-beta) dehydrogenase 4	NM_008292
ENSMUSG00000039176	153.422	1.96393	0.431039	4.55627	5.20691e-06	0.000112179	18975	ENSMUSG00000039176	Polg	polymerase (DNA directed), gamma	NM_001360095
ENSMUSG00000030291	24.7162	1.96335	0.600184	3.27125	0.00107075	0.00895362	108098	ENSMUSG00000030291	Med21	mediator complex subunit 21	NM_025315
ENSMUSG00000049516	103.337	1.96156	0.413574	4.74294	2.10634e-06	5.26212e-05	101685	ENSMUSG00000049516	Spty2d1	SPT2 chromatin protein domain containing 1	NM_175318
ENSMUSG00000022905	68.0861	1.95417	0.47978	4.07306	4.64003e-05	0.000700729	16646	ENSMUSG00000022905	Kpna1	karyopherin (importin) alpha 1	NM_008465
ENSMUSG00000011148	122.252	1.94489	0.50976	3.81532	0.000136009	0.00171104	11565	ENSMUSG00000011148	Adssl1	adenylosuccinate synthetase like 1	NM_007421
ENSMUSG00000026615	309.702	1.93462	0.371036	5.21412	1.84694e-07	6.25562e-06	107508	ENSMUSG00000026615	Eprs	glutamyl-prolyl-tRNA synthetase	NM_001357474
ENSMUSG00000032485	263.049	1.92417	0.541798	3.55144	0.000383123	0.00396927	235623	ENSMUSG00000032485	Scap	SREBF chaperone	NM_001001144
ENSMUSG00000037649	3849.93	1.91582	0.589942	3.24747	0.00116434	0.00950496	14998	ENSMUSG00000037649	H2-DMa	histocompatibility 2, class II, locus DMa	NM_001360530
ENSMUSG00000013275	70.9398	1.9069	0.59043	3.22969	0.00123925	0.00998743	98396	ENSMUSG00000013275	Slc41a1	solute carrier family 41, member 1	NM_173865
ENSMUSG00000022801	167.658	1.90527	0.473207	4.0263	5.66619e-05	0.000822211	70144	ENSMUSG00000022801	Lrch3	leucine-rich repeats and calponin homology (CH) domain containing 3	NM_001081255
ENSMUSG00000026283	42.3369	1.90141	0.470317	4.04284	5.28084e-05	0.000774266	66262	ENSMUSG00000026283	Ing5	inhibitor of growth family, member 5	NM_025454
ENSMUSG00000004788	233.444	1.89997	0.44723	4.2483	2.15399e-05	0.00036877	217715	ENSMUSG00000004788	Eif2b2	eukaryotic translation initiation factor 2B, subunit 2 beta	NM_145445
ENSMUSG00000025025	159.719	1.89588	0.520001	3.64591	0.000266448	0.0029843	17859	ENSMUSG00000025025	Mxi1	MAX interactor 1, dimerization protein	NM_001008542
ENSMUSG00000005774	32.3987	1.86787	0.578193	3.23052	0.00123563	0.00997347	53970	ENSMUSG00000005774	Rfx5	regulatory factor X, 5 (influences HLA class II expression)	NM_001355705
ENSMUSG00000047767	44.1871	1.86473	0.47537	3.92269	8.75673e-05	0.00119441	73683	ENSMUSG00000047767	Atg16l2	autophagy related 16-like 2 (S. cerevisiae)	NM_001111111
ENSMUSG00000025234	121.967	1.85951	0.37984	4.8955	9.80555e-07	2.72505e-05	23806	ENSMUSG00000025234	Arih1	ariadne RBR E3 ubiquitin protein ligase 1	NM_019927
ENSMUSG00000022453	195.802	1.85435	0.477715	3.88171	0.000103726	0.00137747	17939	ENSMUSG00000022453	Naga	N-acetyl galactosaminidase, alpha	NM_001355546
ENSMUSG00000027176	43.3247	1.84923	0.477376	3.87375	0.000107175	0.00141382	228410	ENSMUSG00000027176	Cstf3	cleavage stimulation factor, 3' pre-RNA, subunit 3	NM_001037326
ENSMUSG00000060260	78.2967	1.84346	0.514659	3.58191	0.000341094	0.00362171	101631	ENSMUSG00000060260	Pwwp2b	PWWP domain containing 2B	NM_001033206
ENSMUSG00000003752	92.0311	1.83947	0.549944	3.34484	0.000823312	0.00717406	233011	ENSMUSG00000003752	Itpkc	inositol 1,4,5-trisphosphate 3-kinase C	NM_181593
ENSMUSG00000052214	237.895	1.83563	0.286536	6.40627	1.49121e-10	1.20754e-08	403187	ENSMUSG00000052214	Opa3	optic atrophy 3	NM_207525
ENSMUSG00000026289	111.462	1.83287	0.363739	5.03897	4.68047e-07	1.3972e-05	77040	ENSMUSG00000026289	Atg16l1	autophagy related 16-like 1 (S. cerevisiae)	NM_001205391
ENSMUSG00000046962	71.7158	1.83193	0.349117	5.24734	1.54312e-07	5.47005e-06	114565	ENSMUSG00000046962	Zbtb21	zinc finger and BTB domain containing 21	NM_001081684
ENSMUSG00000023286	174.473	1.82569	0.351156	5.19909	2.00267e-07	6.67085e-06	140499	ENSMUSG00000023286	Ube2j2	ubiquitin-conjugating enzyme E2J 2	NM_001039157
ENSMUSG00000023249	175.841	1.81994	0.484782	3.75413	0.000173945	0.00208232	235587	ENSMUSG00000023249	Parp3	poly (ADP-ribose) polymerase family, member 3	NM_001311150
ENSMUSG00000025103	112.036	1.81952	0.412105	4.41519	1.00922e-05	0.000195867	83962	ENSMUSG00000025103	Btbd1	BTB (POZ) domain containing 1	NM_146193
ENSMUSG00000037822	410.552	1.80864	0.471122	3.839	0.000123535	0.00158093	68552	ENSMUSG00000037822	Smim14	small integral membrane protein 14	NM_133697
ENSMUSG00000034377	103.887	1.78314	0.392619	4.54165	5.58144e-06	0.000119336	68842	ENSMUSG00000034377	Tulp4	tubby like protein 4	NM_001033529
ENSMUSG00000025337	322.935	1.77595	0.242454	7.3249	2.39071e-13	3.50887e-11	66711	ENSMUSG00000025337	Sbds	SBDS ribosome maturation factor	NM_023248
ENSMUSG00000033767	98.9809	1.75998	0.473608	3.71612	0.000202307	0.00237542	229473	ENSMUSG00000033767	Tmem131l	transmembrane 131 like	NM_172681
ENSMUSG00000029464	102.619	1.74807	0.459973	3.80038	0.000144476	0.00178722	68080	ENSMUSG00000029464	Gpn3	GPN-loop GTPase 3	NM_024216
ENSMUSG00000015133	300.507	1.73671	0.481989	3.60321	0.000314313	0.00340143	233328	ENSMUSG00000015133	Lrrk1	leucine-rich repeat kinase 1	NM_146191
ENSMUSG00000023272	169.303	1.73462	0.355732	4.87621	1.08143e-06	2.96447e-05	76737	ENSMUSG00000023272	Creld2	cysteine-rich with EGF-like domains 2	NM_029720
ENSMUSG00000020743	240.887	1.7326	0.351317	4.93173	8.15049e-07	2.29681e-05	69674	ENSMUSG00000020743	Mif4gd	MIF4G domain containing	NM_001243584
ENSMUSG00000008859	470.575	1.72934	0.482053	3.58745	0.000333925	0.003559	56044	ENSMUSG00000008859	Rala	v-ral simian leukemia viral oncogene A (ras related)	NM_019491
ENSMUSG00000031256	32.075	1.72912	0.446341	3.874	0.000107066	0.00141382	108062	ENSMUSG00000031256	Cstf2	cleavage stimulation factor, 3' pre-RNA subunit 2	NM_001290398
ENSMUSG00000029071	141.699	1.72315	0.424176	4.06234	4.85835e-05	0.000725149	13542	ENSMUSG00000029071	Dvl1	dishevelled segment polarity protein 1	NM_001302342
ENSMUSG00000020034	127.805	1.70479	0.389643	4.37527	1.21282e-05	0.000229377	216198	ENSMUSG00000020034	Tcp11l2	t-complex 11 (mouse) like 2	NM_146008
ENSMUSG00000086316	116.613	1.70442	0.435227	3.91616	8.99689e-05	0.00121891	70123	ENSMUSG00000086316	Nbdy	negative regulator of P-body association	NM_027327
ENSMUSG00000020668	25.1047	1.69991	0.509274	3.33791	0.000844123	0.0073237	16570	ENSMUSG00000020668	Kif3c	kinesin family member 3C	NM_008445
ENSMUSG00000022973	399.722	1.69243	0.286528	5.9067	3.49035e-09	1.91409e-07	104015	ENSMUSG00000022973	Synj1	synaptojanin 1	NM_001045515
ENSMUSG00000039156	102.813	1.68536	0.463904	3.63299	0.00028016	0.00310579	116873	ENSMUSG00000039156	Stim2	stromal interaction molecule 2	NM_001081103
ENSMUSG00000037731	805.6	1.68451	0.430069	3.91684	8.9716e-05	0.00121782	230787	ENSMUSG00000037731	Themis2	thymocyte selection associated family member 2	NM_001033308
ENSMUSG00000024097	432.45	1.6845	0.41433	4.06561	4.79065e-05	0.000716563	225027	ENSMUSG00000024097	Srsf7	serine/arginine-rich splicing factor 7	NM_001195485
ENSMUSG00000062210	423.143	1.66575	0.411439	4.0486	5.15244e-05	0.000760984	106869	ENSMUSG00000062210	Tnfaip8	tumor necrosis factor, alpha-induced protein 8	NM_001177759
ENSMUSG00000007659	300.296	1.66037	0.450408	3.68636	0.000227483	0.0026117	12048	ENSMUSG00000007659	Bcl2l1	BCL2-like 1	NM_001289716
ENSMUSG00000020455	168.794	1.65492	0.348969	4.74231	2.11291e-06	5.26815e-05	94091	ENSMUSG00000020455	Trim11	tripartite motif-containing 11	NM_001290988
ENSMUSG00000061979	44.7624	1.65193	0.376269	4.39027	1.13209e-05	0.000216727	94254	ENSMUSG00000061979	Rcc1l	reculator of chromosome condensation 1 like	NM_033572
ENSMUSG00000067194	187.22	1.64922	0.347667	4.74368	2.09875e-06	5.25376e-05	66235	ENSMUSG00000067194	Eif1ax	eukaryotic translation initiation factor 1A, X-linked	NM_025437
ENSMUSG00000032424	47.9228	1.63212	0.378575	4.31122	1.62357e-05	0.00029277	#N/A	ENSMUSG00000032424	#N/A	#N/A	#N/A
ENSMUSG00000004071	125.74	1.62166	0.466165	3.47872	0.000503821	0.00494911	66626	ENSMUSG00000004071	Cdip1	cell death inducing Trp53 target 1	NM_001358078
ENSMUSG00000021669	178.571	1.62042	0.462182	3.50603	0.000454839	0.0045711	68018	ENSMUSG00000021669	Col4a3bp	collagen, type IV, alpha 3 (Goodpasture antigen) binding protein	NM_001164222
ENSMUSG00000028277	258.21	1.60705	0.374846	4.28724	1.8091e-05	0.000317437	56228	ENSMUSG00000028277	Ube2j1	ubiquitin-conjugating enzyme E2J 1	NM_001355494
ENSMUSG00000031015	149.296	1.6008	0.439503	3.6423	0.000270208	0.00301921	20947	ENSMUSG00000031015	Swap70	SWA-70 protein	NM_009302
ENSMUSG00000030822	167.672	1.58945	0.333401	4.7674	1.86621e-06	4.75497e-05	233895	ENSMUSG00000030822	Prr14	proline rich 14	NM_145589
ENSMUSG00000071528	111.711	1.58741	0.434908	3.65	0.000262244	0.00294475	66477	ENSMUSG00000071528	Atp5md	ATP synthase membrane subunit DAPIT	NM_023211
ENSMUSG00000008226	47.5703	1.58253	0.458645	3.45045	0.000559655	0.00534613	74616	ENSMUSG00000008226	Scrn3	secernin 3	NM_001355711
ENSMUSG00000002881	98.6773	1.57642	0.402417	3.91739	8.95133e-05	0.00121742	17936	ENSMUSG00000002881	Nab1	Ngfi-A binding protein 1	NM_008667
ENSMUSG00000030057	628.672	1.57383	0.254647	6.18043	6.39252e-10	4.24862e-08	12785	ENSMUSG00000030057	Cnbp	cellular nucleic acid binding protein	NM_001109745
ENSMUSG00000042406	1602.64	1.573	0.436599	3.60284	0.00031476	0.00340366	11911	ENSMUSG00000042406	Atf4	activating transcription factor 4	NM_001287180
ENSMUSG00000021987	137.729	1.57253	0.353427	4.44938	8.61202e-06	0.000170906	219135	ENSMUSG00000021987	Mtmr6	myotubularin related protein 6	NM_144843
ENSMUSG00000032370	208.263	1.5655	0.428662	3.65206	0.000260145	0.00292767	80907	ENSMUSG00000032370	Lactb	lactamase, beta	NM_030717
ENSMUSG00000029147	302.157	1.55453	0.274198	5.66938	1.43317e-08	6.91551e-07	14208	ENSMUSG00000029147	Ppm1g	protein phosphatase 1G (formerly 2C), magnesium-dependent, gamma isoform	NM_008014
ENSMUSG00000047714	90.2516	1.54465	0.44345	3.48326	0.00049534	0.00489092	66849	ENSMUSG00000047714	Ppp1r2	protein phosphatase 1, regulatory inhibitor subunit 2	NM_025800
ENSMUSG00000060743	602.12	1.54383	0.389752	3.96105	7.46219e-05	0.00103998	15078	ENSMUSG00000060743	H3f3a	H3.3 histone A	NM_008210
ENSMUSG00000037894	223.439	1.54359	0.467672	3.30059	0.000964805	0.008209	51788	ENSMUSG00000037894	H2afz	H2A histone family, member Z	NM_001316995
ENSMUSG00000025959	445.112	1.54306	0.351941	4.38443	1.1629e-05	0.000220529	93691	ENSMUSG00000025959	Klf7	Kruppel-like factor 7 (ubiquitous)	NM_033563
ENSMUSG00000028889	94.2269	1.53991	0.418094	3.68316	0.00023036	0.00263456	230734	ENSMUSG00000028889	Yrdc	yrdC domain containing (E.coli)	NM_153566
ENSMUSG00000071715	641.014	1.53671	0.427304	3.59629	0.000322793	0.00346923	17972	ENSMUSG00000071715	Ncf4	neutrophil cytosolic factor 4	NM_008677
ENSMUSG00000034636	78.4642	1.52701	0.450446	3.39	0.000698933	0.00633252	414872	ENSMUSG00000034636	Zyg11b	zyg-ll family member B, cell cycle regulator	NM_001033634
ENSMUSG00000026036	64.1025	1.52693	0.437198	3.49253	0.00047847	0.00476104	65102	ENSMUSG00000026036	Nif3l1	Ngg1 interacting factor 3-like 1 (S. pombe)	NM_022988
ENSMUSG00000020397	150.007	1.52416	0.418949	3.63807	0.000274694	0.00305963	66213	ENSMUSG00000020397	Med7	mediator complex subunit 7	NM_001104530
ENSMUSG00000025868	738.664	1.51536	0.290591	5.21477	1.84048e-07	6.25562e-06	67044	ENSMUSG00000025868	Higd2a	HIG1 domain family, member 2A	NM_025933
ENSMUSG00000045160	167.871	1.51196	0.422283	3.58045	0.000342999	0.00363373	78653	ENSMUSG00000045160	Bola3	bolA-like 3 (E. coli)	NM_001363772
ENSMUSG00000039168	322.906	1.49905	0.374074	4.00737	6.1399e-05	0.00088097	223453	ENSMUSG00000039168	Dap	death-associated protein	NM_146057
ENSMUSG00000033186	71.3293	1.49761	0.39112	3.82903	0.000128652	0.00163601	76789	ENSMUSG00000033186	Mzt1	mitotic spindle organizing protein 1	NM_175245
ENSMUSG00000031545	235.645	1.49454	0.390517	3.82708	0.000129674	0.00164605	102247	ENSMUSG00000031545	Gpat4	glycerol-3-phosphate acyltransferase 4	NM_018743
ENSMUSG00000022205	471.038	1.48405	0.427426	3.47206	0.000516474	0.00503258	20024	ENSMUSG00000022205	Sub1	SUB1 homolog, transcriptional regulator	NM_011294
ENSMUSG00000028879	190.601	1.48112	0.381966	3.87763	0.000105479	0.00139419	100226	ENSMUSG00000028879	Stx12	syntaxin 12	NM_133887
ENSMUSG00000029363	57.099	1.4752	0.368542	4.0028	6.25968e-05	0.00089542	72151	ENSMUSG00000029363	Rfc5	replication factor C (activator 1) 5	NM_028128
ENSMUSG00000028840	81.3166	1.46914	0.35425	4.14719	3.36577e-05	0.000537127	68040	ENSMUSG00000028840	Zfp593	zinc finger protein 593	NM_024215
ENSMUSG00000048277	1153.4	1.44666	0.42199	3.42819	0.000607629	0.00566611	20973	ENSMUSG00000048277	Syngr2	synaptogyrin 2	NM_009304
ENSMUSG00000037513	295.294	1.42897	0.400589	3.56716	0.000360867	0.00377477	#N/A	ENSMUSG00000037513	#N/A	#N/A	#N/A
ENSMUSG00000020941	262.042	1.42825	0.429025	3.32906	0.000871386	0.00753704	53859	ENSMUSG00000020941	Map3k14	mitogen-activated protein kinase kinase kinase 14	NM_016896
ENSMUSG00000049470	184.948	1.42729	0.355649	4.01319	5.99042e-05	0.000862155	93736	ENSMUSG00000049470	Aff4	AF4/FMR2 family, member 4	NM_001363331
ENSMUSG00000008855	390.038	1.42543	0.368369	3.86958	0.000109021	0.00142761	15184	ENSMUSG00000008855	Hdac5	histone deacetylase 5	NM_001077696
ENSMUSG00000029311	340.863	1.41506	0.230431	6.14093	8.20396e-10	5.37646e-08	114664	ENSMUSG00000029311	Hsd17b11	hydroxysteroid (17-beta) dehydrogenase 11	NM_053262
ENSMUSG00000061787	3183.97	1.41325	0.344327	4.10437	4.05412e-05	0.000629796	20068	ENSMUSG00000061787	Rps17	ribosomal protein S17	NM_009092
ENSMUSG00000036615	143.418	1.40536	0.333692	4.21153	2.53646e-05	0.000423444	170767	ENSMUSG00000036615	Rfxap	regulatory factor X-associated protein	NM_133231
ENSMUSG00000022947	71.6793	1.40416	0.338066	4.15349	3.27438e-05	0.000524869	109857	ENSMUSG00000022947	Cbr3	carbonyl reductase 3	NM_173047
ENSMUSG00000066043	110.946	1.40098	0.379223	3.69433	0.000220464	0.00254668	100169	ENSMUSG00000066043	Phactr4	phosphatase and actin regulator 4	NM_001161797
ENSMUSG00000032097	277.865	1.3974	0.310521	4.50017	6.78978e-06	0.000138915	13209	ENSMUSG00000032097	Ddx6	DEAD (Asp-Glu-Ala-Asp) box polypeptide 6	NM_001110826
ENSMUSG00000024312	75.8613	1.3882	0.405589	3.42268	0.000620063	0.00573273	57315	ENSMUSG00000024312	Wdr46	WD repeat domain 46	NM_020603
ENSMUSG00000029131	140.646	1.38348	0.426869	3.24099	0.00119115	0.00966227	23950	ENSMUSG00000029131	Dnajb6	DnaJ heat shock protein family (Hsp40) member B6	NM_001037940
ENSMUSG00000020430	137.711	1.37586	0.352175	3.90674	9.35484e-05	0.00126134	64934	ENSMUSG00000020430	Pes1	pescadillo ribosomal biogenesis factor 1	NM_022889
ENSMUSG00000003269	209.878	1.37268	0.254043	5.40336	6.54041e-08	2.64811e-06	19158	ENSMUSG00000003269	Cyth2	cytohesin 2	NM_001112701
ENSMUSG00000041264	66.9914	1.36848	0.331783	4.12462	3.7135e-05	0.000580724	231915	ENSMUSG00000041264	Uspl1	ubiquitin specific peptidase like 1	NM_001013378
ENSMUSG00000030263	352.168	1.36457	0.375528	3.63375	0.000279336	0.00310153	16970	ENSMUSG00000030263	Lrmp	lymphoid-restricted membrane protein	NM_001281980
ENSMUSG00000040297	58.3678	1.3622	0.38186	3.56726	0.00036073	0.00377477	226551	ENSMUSG00000040297	Suco	SUN domain containing ossification factor	NM_001357401
ENSMUSG00000042670	43.4526	1.35928	0.392834	3.4602	0.000539775	0.00520207	66541	ENSMUSG00000042670	Immp1l	IMP1 inner mitochondrial membrane peptidase-like (S. cerevisiae)	NM_028260
ENSMUSG00000078671	328.878	1.35895	0.339341	4.00466	6.21063e-05	0.000889306	244059	ENSMUSG00000078671	Chd2	chromodomain helicase DNA binding protein 2	NM_001081345
ENSMUSG00000040843	131.146	1.35857	0.291318	4.66354	3.10812e-06	7.34788e-05	226591	ENSMUSG00000040843	Tiprl	TIP41, TOR signalling pathway regulator-like (S. cerevisiae)	NM_001357410
ENSMUSG00000022897	126.923	1.35313	0.339781	3.98236	6.82354e-05	0.000962399	13548	ENSMUSG00000022897	Dyrk1a	dual-specificity tyrosine-(Y)-phosphorylation regulated kinase 1a	NM_001113389
ENSMUSG00000040661	29.6168	1.34699	0.389986	3.45393	0.000552472	0.00528468	81000	ENSMUSG00000040661	Rad54l2	RAD54 like 2 (S. cerevisiae)	NM_030730
ENSMUSG00000063358	243.7	1.34295	0.38938	3.44896	0.00056276	0.00536438	26413	ENSMUSG00000063358	Mapk1	mitogen-activated protein kinase 1	NM_001038663
ENSMUSG00000028060	94.3057	1.33708	0.362681	3.68666	0.000227221	0.00261137	74200	ENSMUSG00000028060	Khdc4	KH domain containing 4, pre-mRNA splicing factor	NM_028814
ENSMUSG00000026977	133.432	1.33315	0.392172	3.39939	0.000675363	0.00615947	57438	ENSMUSG00000026977	March7	membrane-associated ring finger (C3HC4) 7	NM_020575
ENSMUSG00000073155	322.233	1.33272	0.372377	3.57896	0.00034497	0.00364912	67705	ENSMUSG00000073155	1810058I24Rik	RIKEN cDNA 1810058I24 gene	NR_015608
ENSMUSG00000023027	79.1716	1.32179	0.374606	3.52848	0.000417955	0.00426738	11908	ENSMUSG00000023027	Atf1	activating transcription factor 1	NM_007497
ENSMUSG00000063800	78.6349	1.32002	0.379468	3.4786	0.000504043	0.00494911	230596	ENSMUSG00000063800	Prpf38a	PRP38 pre-mRNA processing factor 38 (yeast) domain containing A	NM_172697
ENSMUSG00000067365	121.103	1.31835	0.343832	3.83429	0.000125926	0.0016057	66309	ENSMUSG00000067365	Tmem128	transmembrane protein 128	NM_001356960
ENSMUSG00000061983	7427.23	1.31528	0.379358	3.46711	0.00052608	0.00510501	20042	ENSMUSG00000061983	Rps12	ribosomal protein S12	NM_011295
ENSMUSG00000030055	425.555	1.30963	0.374607	3.49601	0.000472266	0.00470596	69834	ENSMUSG00000030055	Rab43	RAB43, member RAS oncogene family	NM_001039394
ENSMUSG00000039230	58.2721	1.30945	0.374184	3.49949	0.000466155	0.00465824	108903	ENSMUSG00000039230	Tbcd	tubulin-specific chaperone d	NM_029878
ENSMUSG00000031537	406.305	1.29596	0.247057	5.24558	1.55789e-07	5.48768e-06	16150	ENSMUSG00000031537	Ikbkb	inhibitor of kappaB kinase beta	NM_001159774
ENSMUSG00000058600	1021.23	1.29528	0.376358	3.44162	0.000578234	0.005468	19946	ENSMUSG00000058600	Rpl30	ribosomal protein L30	NM_001163485
ENSMUSG00000078578	368.533	1.29502	0.370902	3.49154	0.000480252	0.00477203	66105	ENSMUSG00000078578	Ube2d3	ubiquitin-conjugating enzyme E2D 3	NM_001356594
ENSMUSG00000059182	339.536	1.29435	0.382654	3.38256	0.000718127	0.00646543	54353	ENSMUSG00000059182	Skap2	src family associated phosphoprotein 2	NM_018773
ENSMUSG00000031029	1089.01	1.29217	0.390616	3.30804	0.000939524	0.00801326	66085	ENSMUSG00000031029	Eif3f	eukaryotic translation initiation factor 3, subunit F	NM_025344
ENSMUSG00000032112	227.027	1.28403	0.313641	4.09396	4.24059e-05	0.000653004	60409	ENSMUSG00000032112	Trappc4	trafficking protein particle complex 4	NM_021789
ENSMUSG00000010095	1871.98	1.28132	0.346744	3.69528	0.000219645	0.00254507	17254	ENSMUSG00000010095	Slc3a2	solute carrier family 3 (activators of dibasic and neutral amino acid transport), member 2	NM_001161413
ENSMUSG00000058546	3139.04	1.2755	0.368322	3.46301	0.000534162	0.00515503	268449	ENSMUSG00000058546	Rpl23a	ribosomal protein L23A	NM_207523
ENSMUSG00000028998	461.664	1.27349	0.389156	3.27243	0.00106626	0.00892142	66169	ENSMUSG00000028998	Tomm7	translocase of outer mitochondrial membrane 7	NM_025394
ENSMUSG00000066571	103.628	1.2696	0.348966	3.63818	0.000274574	0.00305963	233103	ENSMUSG00000066571	4931406P16Rik	RIKEN cDNA 4931406P16 gene	NM_172741
ENSMUSG00000041841	3666.8	1.26858	0.3032	4.18397	2.86462e-05	0.000468436	67281	ENSMUSG00000041841	Rpl37	ribosomal protein L37	NM_026069
ENSMUSG00000020248	53.2232	1.26819	0.309396	4.09893	4.15071e-05	0.000643382	18045	ENSMUSG00000020248	Nfyb	nuclear transcription factor-Y beta	NM_010914
ENSMUSG00000052146	4084.35	1.25902	0.353563	3.56095	0.000369518	0.00385667	67097	ENSMUSG00000052146	Rps10	ribosomal protein S10	NM_001364934
ENSMUSG00000052040	1014.74	1.255	0.3508	3.57753	0.000346856	0.00366357	50794	ENSMUSG00000052040	Klf13	Kruppel-like factor 13	NM_021366
ENSMUSG00000016308	241.649	1.25228	0.3306	3.7879	0.000151926	0.00185854	22209	ENSMUSG00000016308	Ube2a	ubiquitin-conjugating enzyme E2A	NM_001313696
ENSMUSG00000030967	198.553	1.25148	0.366464	3.41501	0.000637788	0.00586667	360216	ENSMUSG00000030967	Zranb1	zinc finger, RAN-binding domain containing 1	NM_001362198
ENSMUSG00000032745	162.684	1.24918	0.302648	4.12749	3.66751e-05	0.000574168	73274	ENSMUSG00000032745	Gpbp1	GC-rich promoter binding protein 1	NM_001122963
ENSMUSG00000020946	81.9014	1.24316	0.368749	3.37128	0.00074819	0.00665548	56494	ENSMUSG00000020946	Gosr2	golgi SNAP receptor complex member 2	NM_001362852
ENSMUSG00000025485	255.887	1.22246	0.293576	4.16405	3.12658e-05	0.000504622	101489	ENSMUSG00000025485	Ric8a	RIC8 guanine nucleotide exchange factor A	NM_053194
ENSMUSG00000024146	162.132	1.22059	0.351418	3.47332	0.000514055	0.00501595	56724	ENSMUSG00000024146	Cript	cysteine-rich PDZ-binding protein	NM_019936
ENSMUSG00000003346	499.873	1.21481	0.291838	4.16263	3.14602e-05	0.000507179	216169	ENSMUSG00000003346	Abhd17a	abhydrolase domain containing 17A	NM_145421
ENSMUSG00000062006	2574.73	1.20498	0.33813	3.56366	0.000365713	0.00382263	68436	ENSMUSG00000062006	Rpl34	ribosomal protein L34	NM_001005859
ENSMUSG00000003437	217.176	1.20042	0.296156	4.05332	5.04952e-05	0.000750503	54624	ENSMUSG00000003437	Paf1	Paf1, RNA polymerase II complex component	NM_019458
ENSMUSG00000084786	511.812	1.19706	0.340935	3.51109	0.000446265	0.00450421	66177	ENSMUSG00000084786	Ubl5	ubiquitin-like 5	NM_001310746
ENSMUSG00000017421	270.052	1.18092	0.317321	3.72153	0.000198018	0.0023387	22680	ENSMUSG00000017421	Zfp207	zinc finger protein 207	NM_001130169
ENSMUSG00000041459	295.611	1.17334	0.296949	3.95131	7.77231e-05	0.0010705	230908	ENSMUSG00000041459	Tardbp	TAR DNA binding protein	NM_001003898
ENSMUSG00000003068	347.865	1.16756	0.305452	3.8224	0.000132161	0.00167159	20869	ENSMUSG00000003068	Stk11	serine/threonine kinase 11	NM_001301853
ENSMUSG00000031536	161.759	1.15323	0.347896	3.31488	0.000916811	0.00787194	18970	ENSMUSG00000031536	Polb	polymerase (DNA directed), beta	NM_011130
ENSMUSG00000061904	1600.57	1.14094	0.328211	3.47624	0.000508491	0.00498583	18674	ENSMUSG00000061904	Slc25a3	solute carrier family 25 (mitochondrial carrier, phosphate carrier), member 3	NM_133668
ENSMUSG00000004535	444.033	1.13109	0.254495	4.44445	8.81155e-06	0.000174373	52440	ENSMUSG00000004535	Tax1bp1	Tax1 (human T cell leukemia virus type I) binding protein 1	NM_001355595
ENSMUSG00000005262	193.386	1.11401	0.281694	3.95468	7.66369e-05	0.00105968	22230	ENSMUSG00000005262	Ufd1	ubiquitin recognition factor in ER-associated degradation 1	NM_011672
ENSMUSG00000031633	598.964	1.10697	0.280041	3.9529	7.72091e-05	0.0010655	11739	ENSMUSG00000031633	Slc25a4	solute carrier family 25 (mitochondrial carrier, adenine nucleotide translocator), member 4	NM_007450
ENSMUSG00000034024	488.153	1.10147	0.308094	3.57512	0.000350063	0.00369191	12461	ENSMUSG00000034024	Cct2	chaperonin containing Tcp1, subunit 2 (beta)	NM_001358767
ENSMUSG00000029328	475.299	1.09474	0.300682	3.64087	0.000271719	0.0030313	50926	ENSMUSG00000029328	Hnrnpdl	heterogeneous nuclear ribonucleoprotein D-like	NM_016690
ENSMUSG00000020076	142.105	1.08687	0.307437	3.53525	0.000407392	0.00417732	94213	ENSMUSG00000020076	Ddx50	DEAD (Asp-Glu-Ala-Asp) box polypeptide 50	NM_001358819
ENSMUSG00000068823	350.616	1.08063	0.315864	3.42118	0.000623509	0.00575704	229663	ENSMUSG00000068823	Csde1	cold shock domain containing E1, RNA binding	NM_001161854
ENSMUSG00000028878	123.286	1.07903	0.331211	3.25782	0.00112271	0.00926167	230789	ENSMUSG00000028878	Fam76a	family with sequence similarity 76, member A	NM_001163792
ENSMUSG00000020525	43.0678	1.07443	0.290232	3.70198	0.00021392	0.0024869	53892	ENSMUSG00000020525	Ppm1d	protein phosphatase 1D magnesium-dependent, delta isoform	NM_016910
ENSMUSG00000024429	233.762	1.07004	0.242757	4.40786	1.04395e-05	0.000201496	14670	ENSMUSG00000024429	Gnl1	guanine nucleotide binding protein-like 1	NM_008136
ENSMUSG00000038975	150.297	1.06366	0.269476	3.94715	7.90861e-05	0.00108503	19352	ENSMUSG00000038975	Rabggtb	Rab geranylgeranyl transferase, b subunit	NM_001163478
ENSMUSG00000030220	1625.93	1.06076	0.328347	3.23062	0.00123523	0.00997347	11857	ENSMUSG00000030220	Arhgdib	Rho, GDP dissociation inhibitor (GDI) beta	NM_001301301
ENSMUSG00000027854	78.0198	1.05125	0.305881	3.4368	0.000588627	0.00551002	66641	ENSMUSG00000027854	Sike1	suppressor of IKBKE 1	NM_025679
ENSMUSG00000033467	1093.45	1.04492	0.302165	3.45812	0.000543957	0.00522095	57914	ENSMUSG00000033467	Crlf2	cytokine receptor-like factor 2	NM_001164735
ENSMUSG00000036860	160.51	1.0347	0.30771	3.36259	0.000772155	0.00682539	67212	ENSMUSG00000036860	Mrpl55	mitochondrial ribosomal protein L55	NM_001302334
ENSMUSG00000029068	444.049	1.00119	0.284339	3.52113	0.000429718	0.00436534	56036	ENSMUSG00000029068	Ccnl2	cyclin L2	NM_018856

## Sheet: lung AM
	baseMean	log2FoldChange	lfcSE	stat	pvalue	padj	entrez	ensembl	symbol	genename	refseq
ENSMUSG00000030278	172.039	10.9677	3.05645	3.58837	0.000332752	0.00455926	14311	ENSMUSG00000030278	Cidec	cell death-inducing DFFA-like effector c	NM_001301295
ENSMUSG00000040809	4550.71	10.4058	1.80193	5.77479	7.7048e-09	5.40838e-07	12655	ENSMUSG00000040809	Chil3	chitinase-like 3	NM_009892
ENSMUSG00000072601	229.849	10.3866	2.36834	4.38559	1.15669e-05	0.000299297	13586	ENSMUSG00000072601	Ear1	eosinophil-associated, ribonuclease A family, member 1	NM_007894
ENSMUSG00000034258	45.3473	9.85225	1.56634	6.29	3.17458e-10	3.21879e-08	217721	ENSMUSG00000034258	Flvcr2	feline leukemia virus subgroup C cellular receptor 2	NM_145447
ENSMUSG00000036853	29.3956	9.39836	2.24615	4.1842	2.86171e-05	0.000609194	171166	ENSMUSG00000036853	Mcoln3	mucolipin 3	NM_134160
ENSMUSG00000032942	20.63	9.38229	1.7513	5.35734	8.44557e-08	4.56929e-06	22229	ENSMUSG00000032942	Ucp3	uncoupling protein 3 (mitochondrial, proton carrier)	NM_009464
ENSMUSG00000054422	107.924	9.3515	1.58474	5.90099	3.61332e-09	2.76308e-07	14080	ENSMUSG00000054422	Fabp1	fatty acid binding protein 1, liver	NM_017399
ENSMUSG00000031443	224.785	9.26524	1.79976	5.14804	2.63229e-07	1.25903e-05	14068	ENSMUSG00000031443	F7	coagulation factor VII	NM_010172
ENSMUSG00000010651	155.054	8.901	0.915035	9.72749	2.30192e-22	1.85345e-19	235674	ENSMUSG00000010651	Acaa1b	acetyl-Coenzyme A acyltransferase 1B	NM_146230
ENSMUSG00000024008	98.8042	8.82892	2.56829	3.43766	0.000586762	0.00711511	240058	ENSMUSG00000024008	Cpne5	copine V	NM_001360239
ENSMUSG00000062148	7.84679	8.60941	1.43329	6.00675	1.8928e-09	1.57022e-07	93719	ENSMUSG00000062148	Ear6	eosinophil-associated, ribonuclease A family, member 6	NM_053111
ENSMUSG00000070529	6.2528	8.54769	2.38661	3.58151	0.000341611	0.00465735	629756	ENSMUSG00000070529	Wfdc10	WAP four-disulfide core domain 10	NM_001039501
ENSMUSG00000051748	103.302	8.46532	1.88253	4.49678	6.89909e-06	0.000197976	66107	ENSMUSG00000051748	Wfdc21	WAP four-disulfide core domain 21	NM_183249
ENSMUSG00000000794	7.99347	8.4519	1.60019	5.28181	1.27913e-07	6.63211e-06	140493	ENSMUSG00000000794	Kcnn3	potassium intermediate/small conductance calcium-activated channel, subfamily N, member 3	NM_080466
ENSMUSG00000030162	96.2064	8.2394	1.07509	7.66395	1.80306e-14	4.25522e-12	108078	ENSMUSG00000030162	Olr1	oxidized low density lipoprotein (lectin-like) receptor 1	NM_001301094
ENSMUSG00000059463	6.99045	8.21513	2.26843	3.6215	0.000292895	0.0041374	546038	ENSMUSG00000059463	Spag11b	sperm associated antigen 11B	NM_001034905
ENSMUSG00000022097	7.19813	8.20136	1.96824	4.16686	3.08827e-05	0.000651345	20389	ENSMUSG00000022097	Sftpc	surfactant associated protein C	NM_011359
ENSMUSG00000031377	7.43275	8.18065	1.0743	7.61486	2.63972e-14	6.02208e-12	12169	ENSMUSG00000031377	Bmx	BMX non-receptor tyrosine kinase	NM_009759
ENSMUSG00000028111	156.579	8.15486	1.09202	7.46768	8.16235e-14	1.69986e-11	13038	ENSMUSG00000028111	Ctsk	cathepsin K	NM_007802
ENSMUSG00000024907	52.1806	7.98933	1.9673	4.06106	4.88503e-05	0.000955233	14419	ENSMUSG00000024907	Gal	galanin and GMAP prepropeptide	NM_001329667
ENSMUSG00000029314	16.6644	7.94965	1.52733	5.20493	1.94072e-07	9.59011e-06	231510	ENSMUSG00000029314	Gpat3	glycerol-3-phosphate acyltransferase 3	NM_172715
ENSMUSG00000042265	112.662	7.83182	1.2474	6.27854	3.41777e-10	3.41477e-08	58217	ENSMUSG00000042265	Trem1	triggering receptor expressed on myeloid cells 1	NM_001347399
ENSMUSG00000032068	331.673	7.61448	2.15049	3.54081	0.000398898	0.0052653	76509	ENSMUSG00000032068	Plet1	placenta expressed transcript 1	NM_029639
ENSMUSG00000028238	320.047	7.49689	1.48658	5.04303	4.58224e-07	1.99117e-05	242341	ENSMUSG00000028238	Atp6v0d2	ATPase, H+ transporting, lysosomal V0 subunit D2	NM_175406
ENSMUSG00000048834	4.71653	7.49034	1.60318	4.67218	2.98016e-06	9.94936e-05	211739	ENSMUSG00000048834	Vstm2a	V-set and transmembrane domain containing 2A	NM_001290539
ENSMUSG00000064147	75.461	7.46436	1.47354	5.06558	4.07154e-07	1.80946e-05	442827	ENSMUSG00000064147	Rab44	RAB44, member RAS oncogene family	NM_001002786
ENSMUSG00000026065	96.6792	7.35819	1.28406	5.7304	1.00195e-08	6.85737e-07	110895	ENSMUSG00000026065	Slc9a4	solute carrier family 9 (sodium/hydrogen exchanger), member 4	NM_177084
ENSMUSG00000013974	228.564	7.33383	1.32529	5.53374	3.13473e-08	1.84155e-06	69189	ENSMUSG00000013974	Mcemp1	mast cell expressed membrane protein 1	NM_026985
ENSMUSG00000041324	15.5917	7.25452	1.52223	4.76571	1.88193e-06	6.69089e-05	16323	ENSMUSG00000041324	Inhba	inhibin beta-A	NM_008380
ENSMUSG00000035355	24.1322	7.07079	1.6379	4.317	1.58167e-05	0.000378496	380728	ENSMUSG00000035355	Kcnh4	potassium voltage-gated channel, subfamily H (eag-related), member 4	NM_001081194
ENSMUSG00000021363	6.69294	6.92915	1.80985	3.82858	0.000128885	0.00212552	17152	ENSMUSG00000021363	Mak	male germ cell-associated kinase	NM_001145802
ENSMUSG00000086862	14.4654	6.88937	1.994	3.45505	0.000550191	0.00677535	100042926	ENSMUSG00000086862	Gm13546	predicted gene 13546	NR_045895
ENSMUSG00000039431	10.4264	6.86745	1.46933	4.67386	2.95592e-06	9.89259e-05	54384	ENSMUSG00000039431	Mtmr7	myotubularin related protein 7	NM_001040699
ENSMUSG00000045551	103.914	6.77493	1.55592	4.35429	1.33501e-05	0.00033407	14293	ENSMUSG00000045551	Fpr1	formyl peptide receptor 1	NM_013521
ENSMUSG00000072572	46.0198	6.76436	1.15513	5.85592	4.74369e-09	3.56767e-07	214922	ENSMUSG00000072572	Slc39a2	solute carrier family 39 (zinc transporter), member 2	NM_001039676
ENSMUSG00000005800	11.6293	6.51774	1.90905	3.41413	0.000639864	0.00760943	17394	ENSMUSG00000005800	Mmp8	matrix metallopeptidase 8	NM_008611
ENSMUSG00000032135	28.411	6.4804	1.4799	4.37893	1.19261e-05	0.000306134	84004	ENSMUSG00000032135	Mcam	melanoma cell adhesion molecule	NM_001359530
ENSMUSG00000032420	8.16317	6.29148	1.52497	4.12565	3.69692e-05	0.000758124	23959	ENSMUSG00000032420	Nt5e	5' nucleotidase, ecto	NM_011851
ENSMUSG00000030020	4.91143	6.26386	1.12171	5.5842	2.34778e-08	1.45091e-06	243548	ENSMUSG00000030020	Prickle2	prickle planar cell polarity protein 2	NM_001081146
ENSMUSG00000036377	10.2192	6.25196	1.63229	3.83018	0.000128051	0.00212071	320827	ENSMUSG00000036377	C530008M17Rik	RIKEN cDNA C530008M17 gene	NM_001163793
ENSMUSG00000072596	459.039	6.1213	1.54866	3.95264	7.72949e-05	0.00141332	13587	ENSMUSG00000072596	Ear2	eosinophil-associated, ribonuclease A family, member 2	NM_007895
ENSMUSG00000051177	5.45571	6.09371	1.59736	3.81487	0.000136257	0.00222121	18795	ENSMUSG00000051177	Plcb1	phospholipase C, beta 1	NM_001145830
ENSMUSG00000000440	145.372	6.06546	1.00125	6.05791	1.37902e-09	1.21781e-07	19016	ENSMUSG00000000440	Pparg	peroxisome proliferator activated receptor gamma	NM_001127330
ENSMUSG00000031444	114.992	5.94752	1.39639	4.25921	2.05153e-05	0.000468023	14058	ENSMUSG00000031444	F10	coagulation factor X	NM_001242368
ENSMUSG00000061815	22.5416	5.79485	1.31664	4.40124	1.07634e-05	0.000285085	435626	ENSMUSG00000061815	Rufy4	RUN and FYVE domain containing 4	NM_001034060
ENSMUSG00000061859	43.0908	5.76877	0.973797	5.924	3.14205e-09	2.4438e-07	12695	ENSMUSG00000061859	Patj	PATJ, crumbs cell polarity complex component	NM_001005784
ENSMUSG00000017002	274.516	5.71104	1.37413	4.15612	3.23698e-05	0.000675423	20568	ENSMUSG00000017002	Slpi	secretory leukocyte peptidase inhibitor	NM_011414
ENSMUSG00000039013	157.904	5.65266	1.34311	4.20863	2.56921e-05	0.000562677	233186	ENSMUSG00000039013	Siglecf	sialic acid binding Ig-like lectin F	NM_001271019
ENSMUSG00000079445	76.9147	5.62257	1.11221	5.05531	4.29685e-07	1.89241e-05	227327	ENSMUSG00000079445	B3gnt7	UDP-GlcNAc:betaGal beta-1,3-N-acetylglucosaminyltransferase 7	NM_145222
ENSMUSG00000021215	165.336	5.51557	1.15091	4.79235	1.64842e-06	5.95343e-05	56349	ENSMUSG00000021215	Net1	neuroepithelial cell transforming gene 1	NM_001047159
ENSMUSG00000027803	19.5679	5.49569	1.10203	4.98687	6.13669e-07	2.60059e-05	97064	ENSMUSG00000027803	Wwtr1	WW domain containing transcription regulator 1	NM_001168281
ENSMUSG00000029304	178.565	5.42307	1.13056	4.79679	1.61226e-06	5.88457e-05	20750	ENSMUSG00000029304	Spp1	secreted phosphoprotein 1	NM_001204201
ENSMUSG00000039813	19.0124	5.3447	1.43928	3.71344	0.000204459	0.00310135	381605	ENSMUSG00000039813	Tbc1d2	TBC1 domain family, member 2	NM_198664
ENSMUSG00000029648	72.0078	5.32794	1.29148	4.12547	3.69979e-05	0.000758124	14254	ENSMUSG00000029648	Flt1	FMS-like tyrosine kinase 1	NM_001363135
ENSMUSG00000029379	44.3166	5.31519	1.35178	3.93201	8.42399e-05	0.00151521	330122	ENSMUSG00000029379	Cxcl3	chemokine (C-X-C motif) ligand 3	NM_203320
ENSMUSG00000020836	20.788	5.26449	1.02455	5.13835	2.77158e-07	1.29479e-05	216961	ENSMUSG00000020836	Coro6	coronin 6	NM_001368670
ENSMUSG00000022665	19.3002	5.25036	1.32836	3.95251	7.73359e-05	0.00141332	67896	ENSMUSG00000022665	Ccdc80	coiled-coil domain containing 80	NM_026439
ENSMUSG00000025324	47.7512	5.22972	1.31412	3.97963	6.9023e-05	0.0012733	11982	ENSMUSG00000025324	Atp10a	ATPase, class V, type 10A	NM_009728
ENSMUSG00000030159	16.3252	5.08637	0.995615	5.10877	3.24265e-07	1.48944e-05	56760	ENSMUSG00000030159	Clec1b	C-type lectin domain family 1, member b	NM_001204239
ENSMUSG00000089665	17.1607	5.0042	1.36895	3.6555	0.000256679	0.00373197	100503924	ENSMUSG00000089665	Fcor	Foxo1 corepressor	NM_001357661
ENSMUSG00000025092	33.4623	4.96987	1.44741	3.43362	0.000595579	0.00718263	73442	ENSMUSG00000025092	Hspa12a	heat shock protein 12A	NM_001327998
ENSMUSG00000043687	12.6534	4.96774	1.05826	4.69423	2.67608e-06	9.02221e-05	68918	ENSMUSG00000043687	1190005I06Rik	RIKEN cDNA 1190005I06 gene	NM_197988
ENSMUSG00000074280	19.2175	4.96614	1.20938	4.10636	4.01939e-05	0.000815073	#N/A	ENSMUSG00000074280	#N/A	#N/A	#N/A
ENSMUSG00000044734	119.378	4.89976	1.15255	4.25123	2.12597e-05	0.000483393	66222	ENSMUSG00000044734	Serpinb1a	serine (or cysteine) peptidase inhibitor, clade B, member 1a	NM_025429
ENSMUSG00000025213	32.9971	4.89875	1.16814	4.19363	2.74525e-05	0.000589906	107250	ENSMUSG00000025213	Kazald1	Kazal-type serine peptidase inhibitor domain 1	NM_001362397
ENSMUSG00000016194	10.2615	4.87089	1.36202	3.57623	0.000348583	0.00472096	15483	ENSMUSG00000016194	Hsd11b1	hydroxysteroid 11-beta dehydrogenase 1	NM_001044751
ENSMUSG00000031778	20.1883	4.83061	1.14956	4.20213	2.6441e-05	0.000574837	20312	ENSMUSG00000031778	Cx3cl1	chemokine (C-X3-C motif) ligand 1	NM_009142
ENSMUSG00000037411	117.787	4.79952	1.12095	4.28165	1.85515e-05	0.000434073	18787	ENSMUSG00000037411	Serpine1	serine (or cysteine) peptidase inhibitor, clade E, member 1	NM_008871
ENSMUSG00000023087	76.8626	4.73991	1.06507	4.45034	8.57353e-06	0.000236602	12457	ENSMUSG00000023087	Noct	nocturnin	NM_009834
ENSMUSG00000062082	44.2125	4.60343	1.24046	3.71108	0.000206377	0.00311798	239849	ENSMUSG00000062082	Cd200r4	CD200 receptor 4	NM_207244
ENSMUSG00000086309	34.6342	4.5586	1.1996	3.8001	0.000144637	0.00232642	#N/A	ENSMUSG00000086309	#N/A	#N/A	#N/A
ENSMUSG00000045362	5.8476	4.51831	1.14971	3.92997	8.49557e-05	0.00152608	244237	ENSMUSG00000045362	Tnfrsf26	tumor necrosis factor receptor superfamily, member 26	NM_175649
ENSMUSG00000007655	16.7074	4.50531	1.16116	3.88	0.000104458	0.00181219	12389	ENSMUSG00000007655	Cav1	caveolin 1, caveolae protein	NM_001243064
ENSMUSG00000032860	15.2221	4.50423	1.1751	3.83307	0.000126554	0.00209973	18442	ENSMUSG00000032860	P2ry2	purinergic receptor P2Y, G-protein coupled 2	NM_001302346
ENSMUSG00000047798	112.223	4.47503	0.991535	4.51324	6.38458e-06	0.000186735	246746	ENSMUSG00000047798	Cd300lf	CD300 molecule like family member F	NM_001169153
ENSMUSG00000026193	235.882	4.4433	1.32527	3.35276	0.000800106	0.00909245	14268	ENSMUSG00000026193	Fn1	fibronectin 1	NM_001276408
ENSMUSG00000046223	424.307	4.31489	0.806935	5.34725	8.93002e-08	4.81237e-06	18793	ENSMUSG00000046223	Plaur	plasminogen activator, urokinase receptor	NM_011113
ENSMUSG00000032369	24.1836	4.27301	1.00775	4.24014	2.23384e-05	0.000504569	22038	ENSMUSG00000032369	Plscr1	phospholipid scramblase 1	NM_011636
ENSMUSG00000058755	260.061	4.20732	0.926273	4.5422	5.56698e-06	0.000168368	18413	ENSMUSG00000058755	Osm	oncostatin M	NM_001013365
ENSMUSG00000021069	183.222	4.19504	0.839743	4.99562	5.86458e-07	2.50857e-05	110095	ENSMUSG00000021069	Pygl	liver glycogen phosphorylase	NM_133198
ENSMUSG00000015568	723.603	4.1852	0.90506	4.62423	3.75992e-06	0.000121382	16956	ENSMUSG00000015568	Lpl	lipoprotein lipase	NM_008509
ENSMUSG00000036526	90.2746	4.15531	1.09877	3.78177	0.000155714	0.00248198	108723	ENSMUSG00000036526	Card11	caspase recruitment domain family, member 11	NM_175362
ENSMUSG00000036533	81.3911	4.12119	0.677114	6.0864	1.1548e-09	1.06291e-07	260409	ENSMUSG00000036533	Cdc42ep3	CDC42 effector protein (Rho GTPase binding) 3	NM_026514
ENSMUSG00000028121	42.2232	4.11618	0.924186	4.45385	8.4346e-06	0.000234184	29815	ENSMUSG00000028121	Bcar3	breast cancer anti-estrogen resistance 3	NM_001355264
ENSMUSG00000028480	83.2246	4.01131	1.07424	3.7341	0.000188386	0.00290059	384009	ENSMUSG00000028480	Glipr2	GLI pathogenesis-related 2	NM_027450
ENSMUSG00000037868	88.747	3.98255	0.909543	4.37863	1.1943e-05	0.000306134	13654	ENSMUSG00000037868	Egr2	early growth response 2	NM_001347458
ENSMUSG00000029094	37.7068	3.97038	1.046	3.79577	0.000147188	0.00236191	70292	ENSMUSG00000029094	Afap1	actin filament associated protein 1	NM_027373
ENSMUSG00000037418	20.3714	3.94308	1.14704	3.43762	0.000586861	0.00711511	24115	ENSMUSG00000037418	Best1	bestrophin 1	NM_011913
ENSMUSG00000024667	46.6727	3.92883	0.621355	6.323	2.56537e-10	2.66021e-08	68642	ENSMUSG00000024667	Tmem216	transmembrane protein 216	NM_001277860
ENSMUSG00000002058	223.323	3.82141	1.00823	3.79022	0.000150515	0.00240684	22248	ENSMUSG00000002058	Unc119	unc-119 lipid binding chaperone	NM_001313985
ENSMUSG00000028341	113.055	3.80241	1.09518	3.47195	0.000516689	0.0065004	18124	ENSMUSG00000028341	Nr4a3	nuclear receptor subfamily 4, group A, member 3	NM_001307989
ENSMUSG00000024030	362.311	3.76216	0.922022	4.08033	4.49716e-05	0.000894899	11307	ENSMUSG00000024030	Abcg1	ATP binding cassette subfamily G member 1	NM_009593
ENSMUSG00000034445	339.238	3.7548	0.792084	4.74041	2.13291e-06	7.37255e-05	225912	ENSMUSG00000034445	Cyb561a3	cytochrome b561 family, member A3	NM_001282064
ENSMUSG00000020262	39.0891	3.74343	0.890067	4.20578	2.60178e-05	0.000568901	110532	ENSMUSG00000020262	Adarb1	adenosine deaminase, RNA-specific, B1	NM_001024837
ENSMUSG00000020027	61.7443	3.61361	1.05001	3.44152	0.000578464	0.00705275	216233	ENSMUSG00000020027	Socs2	suppressor of cytokine signaling 2	NM_001168655
ENSMUSG00000017390	47.1369	3.57456	1.06634	3.35218	0.000801767	0.00909245	11676	ENSMUSG00000017390	Aldoc	aldolase C, fructose-bisphosphate	NM_001303423
ENSMUSG00000025355	140.177	3.54349	0.886733	3.99612	6.43903e-05	0.00121068	58223	ENSMUSG00000025355	Mmp19	matrix metallopeptidase 19	NM_001164197
ENSMUSG00000030091	33.1112	3.52938	0.83285	4.23772	2.25806e-05	0.00050836	54563	ENSMUSG00000030091	Nup210	nucleoporin 210	NM_018815
ENSMUSG00000009633	21.2719	3.49582	0.995623	3.51119	0.000446113	0.00576619	14373	ENSMUSG00000009633	G0s2	G0/G1 switch gene 2	NM_008059
ENSMUSG00000022305	28.7815	3.45657	0.677698	5.10046	3.3883e-07	1.53573e-05	239393	ENSMUSG00000022305	Lrp12	low density lipoprotein-related protein 12	NM_001347036
ENSMUSG00000040263	160.789	3.45163	0.490608	7.03541	1.98671e-12	3.16211e-10	234825	ENSMUSG00000040263	Klhdc4	kelch domain containing 4	NM_145605
ENSMUSG00000028771	173.162	3.44333	0.512529	6.71832	1.83838e-11	2.46703e-09	19248	ENSMUSG00000028771	Ptpn12	protein tyrosine phosphatase, non-receptor type 12	NM_001356590
ENSMUSG00000021365	99.5887	3.44233	1.01457	3.39289	0.000691582	0.00809784	18003	ENSMUSG00000021365	Nedd9	neural precursor cell expressed, developmentally down-regulated gene 9	NM_001111324
ENSMUSG00000020085	43.0661	3.42175	0.99983	3.42234	0.000620857	0.00742858	71361	ENSMUSG00000020085	Aifm2	apoptosis-inducing factor, mitochondrion-associated 2	NM_001039194
ENSMUSG00000043421	196.569	3.35091	0.837689	4.00019	6.32924e-05	0.00119332	69573	ENSMUSG00000043421	Hilpda	hypoxia inducible lipid droplet associated	NM_001190461
ENSMUSG00000041268	119.723	3.34337	0.710873	4.70318	2.56137e-06	8.69975e-05	235380	ENSMUSG00000041268	Dmxl2	Dmx-like 2	NM_172771
ENSMUSG00000031584	62.6388	3.33939	0.755085	4.42254	9.75471e-06	0.000262323	14782	ENSMUSG00000031584	Gsr	glutathione reductase	NM_010344
ENSMUSG00000042289	457.222	3.30191	0.424723	7.77427	7.58855e-15	1.92356e-12	101502	ENSMUSG00000042289	Hsd3b7	hydroxy-delta-5-steroid dehydrogenase, 3 beta- and steroid delta-isomerase 7	NM_001040684
ENSMUSG00000015143	185.867	3.2879	0.640929	5.1299	2.89891e-07	1.3451e-05	109711	ENSMUSG00000015143	Actn1	actinin, alpha 1	NM_001346669
ENSMUSG00000075705	703.999	3.27087	0.68675	4.76282	1.9091e-06	6.76987e-05	27361	ENSMUSG00000075705	Msrb1	methionine sulfoxide reductase B1	NM_001346668
ENSMUSG00000021182	19.5757	3.24052	0.942247	3.43914	0.000583572	0.00709408	68339	ENSMUSG00000021182	Ccdc88c	coiled-coil domain containing 88C	NM_001362342
ENSMUSG00000091955	280.628	3.2341	0.64192	5.03817	4.70005e-07	2.02947e-05	#N/A	ENSMUSG00000091955	#N/A	#N/A	#N/A
ENSMUSG00000040084	26.3442	3.21198	0.75913	4.23114	2.32514e-05	0.000520892	12236	ENSMUSG00000040084	Bub1b	BUB1B, mitotic checkpoint serine/threonine kinase	NM_009773
ENSMUSG00000029534	47.3662	3.1825	0.689895	4.61302	3.96855e-06	0.000127515	64213	ENSMUSG00000029534	St7	suppression of tumorigenicity 7	NM_001083315
ENSMUSG00000028494	686.254	3.18173	0.660683	4.81582	1.466e-06	5.46774e-05	11520	ENSMUSG00000028494	Plin2	perilipin 2	NM_007408
ENSMUSG00000028420	31.7128	3.17442	0.652119	4.86786	1.12816e-06	4.41205e-05	52076	ENSMUSG00000028420	Tmem38b	transmembrane protein 38B	NM_028053
ENSMUSG00000030168	451.652	3.15792	0.446894	7.06638	1.59029e-12	2.65462e-10	68465	ENSMUSG00000030168	Adipor2	adiponectin receptor 2	NM_001355692
ENSMUSG00000070713	24.3333	3.15509	0.573888	5.49776	3.84653e-08	2.21224e-06	#N/A	ENSMUSG00000070713	#N/A	#N/A	#N/A
ENSMUSG00000027329	43.2564	3.1445	0.814464	3.86082	0.000113008	0.00192155	70997	ENSMUSG00000027329	Spef1	sperm flagellar 1	NM_027641
ENSMUSG00000046573	27.5429	3.07213	0.552712	5.55828	2.72448e-08	1.65012e-06	380840	ENSMUSG00000046573	Lyrm4	LYR motif containing 4	NM_201358
ENSMUSG00000002475	12.9736	3.0435	0.861595	3.5324	0.000411798	0.0054147	106861	ENSMUSG00000002475	Abhd3	abhydrolase domain containing 3	NM_134130
ENSMUSG00000062081	28.3259	2.97085	0.713048	4.16641	3.09431e-05	0.000651613	#N/A	ENSMUSG00000062081	#N/A	#N/A	#N/A
ENSMUSG00000073674	34.7792	2.92873	0.686398	4.2668	1.98293e-05	0.000458017	#N/A	ENSMUSG00000073674	#N/A	#N/A	#N/A
ENSMUSG00000014077	390.054	2.91109	0.6422	4.53299	5.81548e-06	0.000173804	56398	ENSMUSG00000014077	Chp1	calcineurin-like EF hand protein 1	NM_019769
ENSMUSG00000026821	272.726	2.87737	0.742282	3.87638	0.000106023	0.00183237	19730	ENSMUSG00000026821	Ralgds	ral guanine nucleotide dissociation stimulator	NM_001145834
ENSMUSG00000059195	149.15	2.87038	0.585026	4.90642	9.27542e-07	3.70151e-05	#N/A	ENSMUSG00000059195	#N/A	#N/A	#N/A
ENSMUSG00000000275	324.803	2.86441	0.608243	4.70931	2.48551e-06	8.50543e-05	217069	ENSMUSG00000000275	Trim25	tripartite motif-containing 25	NM_009546
ENSMUSG00000032786	314.709	2.85889	0.446668	6.40048	1.54887e-10	1.68262e-08	11655	ENSMUSG00000032786	Alas1	aminolevulinic acid synthase 1	NM_001291835
ENSMUSG00000032540	132.185	2.83945	0.526272	5.39541	6.83686e-08	3.77351e-06	67469	ENSMUSG00000032540	Abhd5	abhydrolase domain containing 5	NM_001359207
ENSMUSG00000021646	49.3537	2.82315	0.6168	4.57709	4.71489e-06	0.00014701	78038	ENSMUSG00000021646	Mccc2	methylcrotonoyl-Coenzyme A carboxylase 2 (beta)	NM_030026
ENSMUSG00000037573	96.9334	2.81117	0.824409	3.40993	0.000649803	0.00769211	22057	ENSMUSG00000037573	Tob1	transducer of ErbB-2.1	NM_009427
ENSMUSG00000020593	338.126	2.77231	0.527401	5.25656	1.46778e-07	7.46875e-06	14245	ENSMUSG00000020593	Lpin1	lipin 1	NM_001130412
ENSMUSG00000061411	37.0587	2.74286	0.731411	3.7501	0.000176766	0.0027427	329540	ENSMUSG00000061411	Nol4l	nucleolar protein 4-like	NM_001001986
ENSMUSG00000036611	47.1523	2.72545	0.630924	4.31977	1.56189e-05	0.000375731	67484	ENSMUSG00000036611	Eepd1	endonuclease/exonuclease/phosphatase family domain containing 1	NM_026189
ENSMUSG00000059248	118.519	2.72458	0.787002	3.46198	0.000536223	0.00667256	53860	ENSMUSG00000059248	Sept9	septin 9	NM_001113486
ENSMUSG00000022555	199.204	2.70679	0.655591	4.12877	3.64703e-05	0.000751815	13350	ENSMUSG00000022555	Dgat1	diacylglycerol O-acyltransferase 1	NM_010046
ENSMUSG00000024666	38.4316	2.70319	0.454863	5.94285	2.80101e-09	2.24212e-07	72982	ENSMUSG00000024666	Tmem138	transmembrane protein 138	NM_001302218
ENSMUSG00000021108	76.4637	2.6909	0.506872	5.30884	1.10324e-07	5.83058e-06	18755	ENSMUSG00000021108	Prkch	protein kinase C, eta	NM_001313977
ENSMUSG00000016541	256.06	2.68004	0.51626	5.19126	2.08877e-07	1.02111e-05	54138	ENSMUSG00000016541	Atxn10	ataxin 10	NM_016843
ENSMUSG00000028076	51.1908	2.65278	0.699658	3.79154	0.000149717	0.00239688	12479	ENSMUSG00000028076	Cd1d1	CD1d1 antigen	NM_007639
ENSMUSG00000024942	185.605	2.63604	0.599607	4.39629	1.10119e-05	0.000288756	12333	ENSMUSG00000024942	Capn1	calpain 1	NM_001110504
ENSMUSG00000028680	358.192	2.60405	0.576937	4.51357	6.37449e-06	0.000186735	12795	ENSMUSG00000028680	Plk3	polo like kinase 3	NM_001313916
ENSMUSG00000073557	57.6688	2.60109	0.705059	3.68918	0.000224978	0.00333087	329251	ENSMUSG00000073557	Ppp1r12b	protein phosphatase 1, regulatory subunit 12B	NM_001081307
ENSMUSG00000026107	77.6989	2.60067	0.671472	3.87308	0.000107467	0.00185265	109019	ENSMUSG00000026107	Nabp1	nucleic acid binding protein 1	NM_001310548
ENSMUSG00000029413	396.339	2.59088	0.524093	4.94355	7.67131e-07	3.17235e-05	67111	ENSMUSG00000029413	Naaa	N-acylethanolamine acid amidase	NM_001163687
ENSMUSG00000081413	29.6411	2.59009	0.695909	3.72187	0.000197749	0.00301089	#N/A	ENSMUSG00000081413	#N/A	#N/A	#N/A
ENSMUSG00000029994	144.158	2.58125	0.625754	4.12502	3.70703e-05	0.000758474	11746	ENSMUSG00000029994	Anxa4	annexin A4	NM_001331120
ENSMUSG00000027346	161.711	2.557	0.413504	6.18374	6.26023e-10	6.12072e-08	74182	ENSMUSG00000027346	Gpcpd1	glycerophosphocholine phosphodiesterase 1	NM_001042671
ENSMUSG00000025017	475.322	2.5458	0.602819	4.22316	2.40906e-05	0.000536182	83490	ENSMUSG00000025017	Pik3ap1	phosphoinositide-3-kinase adaptor protein 1	NM_031376
ENSMUSG00000078088	99.3786	2.51796	0.620257	4.05954	4.91689e-05	0.000957571	#N/A	ENSMUSG00000078088	#N/A	#N/A	#N/A
ENSMUSG00000075312	31.4607	2.51654	0.677873	3.71241	0.000205296	0.00310508	#N/A	ENSMUSG00000075312	#N/A	#N/A	#N/A
ENSMUSG00000067161	100.726	2.51103	0.696369	3.60588	0.000311093	0.00434958	#N/A	ENSMUSG00000067161	#N/A	#N/A	#N/A
ENSMUSG00000027995	763.248	2.50363	0.615064	4.07052	4.69092e-05	0.000926541	24088	ENSMUSG00000027995	Tlr2	toll-like receptor 2	NM_011905
ENSMUSG00000031605	24.0707	2.5035	0.578532	4.32733	1.50927e-05	0.000366292	77113	ENSMUSG00000031605	Klhl2	kelch-like 2, Mayven	NM_178633
ENSMUSG00000020777	178.66	2.49347	0.611567	4.07719	4.55828e-05	0.000902949	11430	ENSMUSG00000020777	Acox1	acyl-Coenzyme A oxidase 1, palmitoyl	NM_001271898
ENSMUSG00000034312	85.1948	2.48578	0.539958	4.60366	4.15136e-06	0.000132456	232227	ENSMUSG00000034312	Iqsec1	IQ motif and Sec7 domain 1	NM_001134383
ENSMUSG00000069367	55.4877	2.46375	0.61645	3.99668	6.42371e-05	0.00120946	#N/A	ENSMUSG00000069367	#N/A	#N/A	#N/A
ENSMUSG00000024410	60.3435	2.44856	0.497241	4.9243	8.46627e-07	3.449e-05	76482	ENSMUSG00000024410	Rmc1	regulator of MON1-CCZ1	NM_029623
ENSMUSG00000028266	741.419	2.43439	0.544658	4.46958	7.83741e-06	0.000220284	16911	ENSMUSG00000028266	Lmo4	LIM domain only 4	NM_001161769
ENSMUSG00000044345	102.71	2.43255	0.671779	3.62106	0.000293398	0.00414023	277010	ENSMUSG00000044345	Marveld1	MARVEL (membrane-associating) domain containing 1	NM_183195
ENSMUSG00000006517	72.4721	2.4299	0.512317	4.74296	2.10621e-06	7.3172e-05	192156	ENSMUSG00000006517	Mvd	mevalonate (diphospho) decarboxylase	NM_138656
ENSMUSG00000068663	59.8905	2.42112	0.486342	4.97823	6.41685e-07	2.70258e-05	74374	ENSMUSG00000068663	Clec16a	C-type lectin domain family 16, member A	NM_001204229
ENSMUSG00000006932	437.465	2.42079	0.441214	5.48665	4.09628e-08	2.34602e-06	12387	ENSMUSG00000006932	Ctnnb1	catenin (cadherin associated protein), beta 1	NM_001165902
ENSMUSG00000021767	47.1016	2.3982	0.622961	3.84968	0.000118273	0.00198154	54169	ENSMUSG00000021767	Kat6b	K(lysine) acetyltransferase 6B	NM_001205241
ENSMUSG00000053581	219.331	2.38348	0.614056	3.88154	0.000103798	0.00180663	100494	ENSMUSG00000053581	Zfand2a	zinc finger, AN1-type domain 2A	NM_001159908
ENSMUSG00000048787	14.5103	2.38284	0.624358	3.81646	0.00013538	0.00221659	233805	ENSMUSG00000048787	Dcun1d3	DCN1, defective in cullin neddylation 1, domain containing 3 (S. cerevisiae)	NM_001163703
ENSMUSG00000030530	185.668	2.36988	0.357947	6.62076	3.57348e-11	4.48751e-09	18550	ENSMUSG00000030530	Furin	furin (paired basic amino acid cleaving enzyme)	NM_001081454
ENSMUSG00000020741	126.357	2.35875	0.513986	4.58914	4.45086e-06	0.000140376	74148	ENSMUSG00000020741	Cluh	clustered mitochondria (cluA/CLU1) homolog	NM_001081158
ENSMUSG00000039934	136.152	2.35473	0.602186	3.91031	9.21764e-05	0.00163434	212167	ENSMUSG00000039934	Gsap	gamma-secretase activating protein	NM_001359876
ENSMUSG00000029390	120.614	2.35395	0.561463	4.19252	2.75868e-05	0.000590937	56334	ENSMUSG00000029390	Tmed2	transmembrane p24 trafficking protein 2	NM_019770
ENSMUSG00000006273	355.399	2.3345	0.401909	5.80853	6.30245e-09	4.54042e-07	11966	ENSMUSG00000006273	Atp6v1b2	ATPase, H+ transporting, lysosomal V1 subunit B2	NM_007509
ENSMUSG00000033684	141.113	2.32826	0.535197	4.35028	1.35963e-05	0.000338374	104009	ENSMUSG00000033684	Qsox1	quiescin Q6 sulfhydryl oxidase 1	NM_001024945
ENSMUSG00000055447	845.954	2.2995	0.340254	6.75819	1.39726e-11	1.9431e-09	16423	ENSMUSG00000055447	Cd47	CD47 antigen (Rh-related antigen, integrin-associated signal transducer)	NM_001368415
ENSMUSG00000006301	427.868	2.29171	0.453338	5.05519	4.29967e-07	1.89241e-05	69660	ENSMUSG00000006301	Tmbim1	transmembrane BAX inhibitor motif containing 1	NM_027154
ENSMUSG00000020231	22.9211	2.27331	0.441834	5.14516	2.67292e-07	1.27038e-05	64451	ENSMUSG00000020231	Dip2a	disco interacting protein 2 homolog A	NM_001081419
ENSMUSG00000024732	198.557	2.27171	0.567383	4.00384	6.23226e-05	0.00117991	108673	ENSMUSG00000024732	Ccdc86	coiled-coil domain containing 86	NM_023731
ENSMUSG00000022094	34.3445	2.22701	0.670739	3.32024	0.000899394	0.00994971	213053	ENSMUSG00000022094	Slc39a14	solute carrier family 39 (zinc transporter), member 14	NM_001135151
ENSMUSG00000036553	166.164	2.22638	0.572836	3.8866	0.000101658	0.0017726	231147	ENSMUSG00000036553	Sh3tc1	SH3 domain and tetratricopeptide repeats 1	NM_001359895
ENSMUSG00000036257	78.7245	2.22436	0.669418	3.32283	0.000891087	0.00989248	67452	ENSMUSG00000036257	Pnpla8	patatin-like phospholipase domain containing 8	NM_026164
ENSMUSG00000019528	116.918	2.19175	0.535274	4.09463	4.22842e-05	0.000849905	27357	ENSMUSG00000019528	Gyg	glycogenin	NM_001355261
ENSMUSG00000006589	801.22	2.18954	0.536716	4.07952	4.51285e-05	0.000895246	11821	ENSMUSG00000006589	Aprt	adenine phosphoribosyl transferase	NM_009698
ENSMUSG00000030545	40.0285	2.18383	0.591597	3.69143	0.000223001	0.00330708	18631	ENSMUSG00000030545	Pex11a	peroxisomal biogenesis factor 11 alpha	NM_011068
ENSMUSG00000019883	24.9918	2.17412	0.643351	3.37937	0.000726531	0.0083944	52665	ENSMUSG00000019883	Echdc1	enoyl Coenzyme A hydratase domain containing 1	NM_001110195
ENSMUSG00000024236	125.974	2.173	0.499819	4.34758	1.37649e-05	0.000341328	225115	ENSMUSG00000024236	Svil	supervillin	NM_001347449
ENSMUSG00000019872	188.846	2.17085	0.629874	3.44648	0.000567941	0.00694744	57319	ENSMUSG00000019872	Smpdl3a	sphingomyelin phosphodiesterase, acid-like 3A	NM_020561
ENSMUSG00000021710	59.0001	2.16145	0.568784	3.80014	0.000144617	0.00232642	75805	ENSMUSG00000021710	Nln	neurolysin (metallopeptidase M3 family)	NM_029447
ENSMUSG00000039753	105.527	2.15884	0.362026	5.96323	2.47299e-09	2.0149e-07	242960	ENSMUSG00000039753	Fbxl5	F-box and leucine-rich repeat protein 5	NM_001159963
ENSMUSG00000032688	80.0714	2.15299	0.512511	4.20087	2.65893e-05	0.000576789	240354	ENSMUSG00000032688	Malt1	MALT1 paracaspase	NM_001365019
ENSMUSG00000037493	290.457	2.15111	0.476298	4.51631	6.29263e-06	0.000186436	56506	ENSMUSG00000037493	Cib2	calcium and integrin binding family member 2	NM_019686
ENSMUSG00000026064	39.948	2.15003	0.622263	3.45518	0.000549935	0.00677535	19243	ENSMUSG00000026064	Ptp4a1	protein tyrosine phosphatase 4a1	NM_011200
ENSMUSG00000050471	68.2825	2.13956	0.300757	7.1139	1.12807e-12	1.93013e-10	109229	ENSMUSG00000050471	Fam118b	family with sequence similarity 118, member B	NM_001286604
ENSMUSG00000032120	92.4662	2.11926	0.387284	5.4721	4.44731e-08	2.52592e-06	71764	ENSMUSG00000032120	C2cd2l	C2 calcium-dependent domain containing 2-like	NM_001359259
ENSMUSG00000079252	82.3023	2.11664	0.496609	4.26219	2.02434e-05	0.000463363	#N/A	ENSMUSG00000079252	#N/A	#N/A	#N/A
ENSMUSG00000035021	439.617	2.10021	0.447146	4.69692	2.64117e-06	8.9265e-05	217578	ENSMUSG00000035021	Baz1a	bromodomain adjacent to zinc finger domain 1A	NM_013815
ENSMUSG00000042569	228.454	2.0848	0.424155	4.91519	8.86971e-07	3.56037e-05	216820	ENSMUSG00000042569	Dhrs7b	dehydrogenase/reductase (SDR family) member 7B	NM_001172112
ENSMUSG00000043157	381.19	2.07693	0.597627	3.4753	0.000510286	0.00643167	219144	ENSMUSG00000043157	Arl11	ADP-ribosylation factor-like 11	NM_177337
ENSMUSG00000002233	315.514	2.06223	0.562956	3.66322	0.000249063	0.00364617	11853	ENSMUSG00000002233	Rhoc	ras homolog family member C	NM_001291859
ENSMUSG00000032382	451.454	2.00758	0.220279	9.11379	7.95538e-20	4.35573e-17	56440	ENSMUSG00000032382	Snx1	sorting nexin 1	NM_019727
ENSMUSG00000030533	148.839	1.99208	0.575246	3.46299	0.000534199	0.00665343	101869	ENSMUSG00000030533	Unc45a	unc-45 myosin chaperone A	NM_133952
ENSMUSG00000086784	52.089	1.98379	0.52089	3.80846	0.000139837	0.00226788	664994	ENSMUSG00000086784	Isoc2a	isochorismatase domain containing 2a	NM_001101598
ENSMUSG00000049327	198.233	1.98286	0.275218	7.20467	5.81845e-13	1.04793e-10	67956	ENSMUSG00000049327	Kmt5a	lysine methyltransferase 5A	NM_001310723
ENSMUSG00000073859	142.451	1.95184	0.410268	4.75748	1.96029e-06	6.8978e-05	#N/A	ENSMUSG00000073859	#N/A	#N/A	#N/A
ENSMUSG00000037326	112.324	1.94385	0.424616	4.57791	4.69642e-06	0.000146769	50817	ENSMUSG00000037326	Capn15	calpain 15	NM_001347334
ENSMUSG00000029229	183.234	1.93308	0.460629	4.19661	2.70938e-05	0.000585877	74277	ENSMUSG00000029229	Chic2	cysteine-rich hydrophobic domain 2	NM_028850
ENSMUSG00000025795	124.453	1.92926	0.500788	3.85244	0.000116944	0.00197135	192678	ENSMUSG00000025795	Rassf3	Ras association (RalGDS/AF-6) domain family member 3	NM_138956
ENSMUSG00000032381	178.633	1.91044	0.327632	5.83106	5.50756e-09	4.03141e-07	68250	ENSMUSG00000032381	Ciao2a	cytosolic iron-sulfur assembly component 2A	NM_001359210
ENSMUSG00000021306	163.067	1.91036	0.450762	4.23807	2.25449e-05	0.00050836	83924	ENSMUSG00000021306	Gpr137b	G protein-coupled receptor 137B	NM_031999
ENSMUSG00000033545	204.903	1.9103	0.472948	4.03914	5.3648e-05	0.00103427	170737	ENSMUSG00000033545	Znrf1	zinc and ring finger 1	NM_001168621
ENSMUSG00000033918	156.871	1.90292	0.448683	4.24113	2.22401e-05	0.000503178	381038	ENSMUSG00000033918	Parl	presenilin associated, rhomboid-like	NM_001005767
ENSMUSG00000000290	1659.12	1.90207	0.442444	4.299	1.7157e-05	0.000405604	16414	ENSMUSG00000000290	Itgb2	integrin beta 2	NM_008404
ENSMUSG00000023068	125.399	1.88573	0.40658	4.63804	3.51735e-06	0.000114784	52014	ENSMUSG00000023068	Nus1	NUS1 dehydrodolichyl diphosphate synthase subunit	NM_030250
ENSMUSG00000025417	162.008	1.88504	0.478819	3.93685	8.25579e-05	0.00148887	117150	ENSMUSG00000025417	Pip4k2c	phosphatidylinositol-5-phosphate 4-kinase, type II, gamma	NM_001359280
ENSMUSG00000086583	143.399	1.85548	0.537051	3.45494	0.000550423	0.00677535	#N/A	ENSMUSG00000086583	#N/A	#N/A	#N/A
ENSMUSG00000034807	578.158	1.85011	0.547483	3.37929	0.000726722	0.0083944	234407	ENSMUSG00000034807	Colgalt1	collagen beta(1-O)galactosyltransferase 1	NM_001364443
ENSMUSG00000027952	132.785	1.84612	0.490364	3.76479	0.000166686	0.00262909	68603	ENSMUSG00000027952	Pmvk	phosphomevalonate kinase	NM_001310640
ENSMUSG00000022533	147.394	1.83997	0.468809	3.92478	8.68105e-05	0.00155736	224088	ENSMUSG00000022533	Atp13a3	ATPase type 13A3	NM_001128094
ENSMUSG00000031328	910.786	1.8323	0.549131	3.33672	0.000847744	0.00951141	192176	ENSMUSG00000031328	Flna	filamin, alpha	NM_001290421
ENSMUSG00000031996	639.849	1.83075	0.536129	3.41475	0.000638404	0.00759867	11804	ENSMUSG00000031996	Aplp2	amyloid beta (A4) precursor-like protein 2	NM_001102455
ENSMUSG00000024900	181.415	1.82116	0.526739	3.45743	0.000545364	0.0067556	12894	ENSMUSG00000024900	Cpt1a	carnitine palmitoyltransferase 1a, liver	NM_013495
ENSMUSG00000057363	44.7275	1.81797	0.460348	3.94913	7.84372e-05	0.00143153	67883	ENSMUSG00000057363	Uxs1	UDP-glucuronate decarboxylase 1	NM_001368287
ENSMUSG00000039680	119.906	1.81539	0.322201	5.63434	1.75729e-08	1.11878e-06	121022	ENSMUSG00000039680	Mrps6	mitochondrial ribosomal protein S6	NM_080456
ENSMUSG00000038301	202.481	1.80671	0.411947	4.38579	1.15563e-05	0.000299297	71982	ENSMUSG00000038301	Snx10	sorting nexin 10	NM_001127348
ENSMUSG00000021417	270.827	1.79854	0.394204	4.56247	5.05549e-06	0.000154809	23986	ENSMUSG00000021417	Eci2	enoyl-Coenzyme A delta isomerase 2	NM_001110331
ENSMUSG00000025366	713.312	1.79801	0.324189	5.54616	2.92005e-08	1.7454e-06	23943	ENSMUSG00000025366	Esyt1	extended synaptotagmin-like protein 1	NM_011843
ENSMUSG00000022362	117.857	1.79615	0.387328	4.63729	3.53014e-06	0.000114784	#N/A	ENSMUSG00000022362	#N/A	#N/A	#N/A
ENSMUSG00000030741	297.408	1.79558	0.404022	4.44425	8.81973e-06	0.000241201	73658	ENSMUSG00000030741	Spns1	spinster homolog 1	NM_023712
ENSMUSG00000018001	128.126	1.79476	0.491863	3.6489	0.00026337	0.00381079	19159	ENSMUSG00000018001	Cyth3	cytohesin 3	NM_001163548
ENSMUSG00000024556	107.286	1.79374	0.501585	3.57615	0.000348691	0.00472096	107029	ENSMUSG00000024556	Me2	malic enzyme 2, NAD(+)-dependent, mitochondrial	NM_145494
ENSMUSG00000062456	254.548	1.79365	0.512691	3.4985	0.000467885	0.00599664	#N/A	ENSMUSG00000062456	#N/A	#N/A	#N/A
ENSMUSG00000038650	1005.14	1.79047	0.2971	6.02647	1.67577e-09	1.41592e-07	107702	ENSMUSG00000038650	Rnh1	ribonuclease/angiogenin inhibitor 1	NM_001172100
ENSMUSG00000034201	215.763	1.79036	0.447106	4.00432	6.21959e-05	0.00117914	78926	ENSMUSG00000034201	Gas2l1	growth arrest-specific 2 like 1	NM_001190406
ENSMUSG00000028405	109.246	1.77199	0.46919	3.7767	0.00015892	0.00252355	11428	ENSMUSG00000028405	Aco1	aconitase 1	NM_007386
ENSMUSG00000032501	367.448	1.76702	0.391104	4.51805	6.24125e-06	0.000185315	211770	ENSMUSG00000032501	Trib1	tribbles pseudokinase 1	NM_144549
ENSMUSG00000024661	21237.2	1.75149	0.506398	3.45872	0.000542749	0.00673363	14319	ENSMUSG00000024661	Fth1	ferritin heavy polypeptide 1	NM_010239
ENSMUSG00000025648	356.978	1.74737	0.44956	3.88684	0.000101559	0.0017726	270198	ENSMUSG00000025648	Pfkfb4	6-phosphofructo-2-kinase/fructose-2,6-biphosphatase 4	NM_001039215
ENSMUSG00000053898	414.885	1.74644	0.219804	7.94544	1.93501e-15	5.29729e-13	51798	ENSMUSG00000053898	Ech1	enoyl coenzyme A hydratase 1, peroxisomal	NM_016772
ENSMUSG00000032026	524.381	1.74306	0.440783	3.95445	7.67116e-05	0.00140755	104444	ENSMUSG00000032026	Rexo2	RNA exonuclease 2	NM_001357501
ENSMUSG00000015806	192.711	1.74054	0.352411	4.93896	7.854e-07	3.23812e-05	110391	ENSMUSG00000015806	Qdpr	quinoid dihydropteridine reductase	NM_024236
ENSMUSG00000031819	173.877	1.7338	0.308035	5.62859	1.81692e-08	1.14608e-06	18117	ENSMUSG00000031819	Emc8	ER membrane protein complex subunit 8	NM_010926
ENSMUSG00000020484	704.587	1.7309	0.389283	4.44638	8.73275e-06	0.000239896	22433	ENSMUSG00000020484	Xbp1	X-box binding protein 1	NM_001271730
ENSMUSG00000057134	56.4653	1.70129	0.493636	3.44645	0.000568008	0.00694744	211488	ENSMUSG00000057134	Ado	2-aminoethanethiol (cysteamine) dioxygenase	NM_001005419
ENSMUSG00000021831	37.8687	1.70054	0.486438	3.49589	0.000472479	0.0060273	50527	ENSMUSG00000021831	Ero1l	ERO1-like (S. cerevisiae)	NM_015774
ENSMUSG00000035397	30.7786	1.69899	0.482098	3.52416	0.000424822	0.00555393	118445	ENSMUSG00000035397	Klf16	Kruppel-like factor 16	NM_078477
ENSMUSG00000020917	179.689	1.69403	0.388556	4.35979	1.30185e-05	0.000326967	104112	ENSMUSG00000020917	Acly	ATP citrate lyase	NM_001199296
ENSMUSG00000028961	490.086	1.68896	0.34623	4.87816	1.07078e-06	4.21175e-05	110208	ENSMUSG00000028961	Pgd	phosphogluconate dehydrogenase	NM_001081274
ENSMUSG00000019832	204.142	1.67992	0.493378	3.40494	0.000661795	0.00779573	67844	ENSMUSG00000019832	Rab32	RAB32, member RAS oncogene family	NM_026405
ENSMUSG00000034006	157.7	1.65138	0.468101	3.52782	0.000418999	0.00549355	66943	ENSMUSG00000034006	Pqlc1	PQ loop repeat containing 1	NM_001164420
ENSMUSG00000024851	263.434	1.64194	0.443711	3.70047	0.000215203	0.00321935	18739	ENSMUSG00000024851	Pitpnm1	phosphatidylinositol transfer protein, membrane-associated 1	NM_001136078
ENSMUSG00000022051	216.424	1.6299	0.363179	4.48786	7.19416e-06	0.000205582	12177	ENSMUSG00000022051	Bnip3l	BCL2/adenovirus E1B interacting protein 3-like	NM_009761
ENSMUSG00000041438	39.278	1.6247	0.462043	3.51633	0.000437552	0.0056716	21771	ENSMUSG00000041438	Utp4	UTP4 small subunit processome component	NM_001358982
ENSMUSG00000018659	84.6251	1.59556	0.44532	3.58295	0.000339731	0.00463633	103711	ENSMUSG00000018659	Pnpo	pyridoxine 5'-phosphate oxidase	NM_134021
ENSMUSG00000019210	452.71	1.59407	0.286322	5.56739	2.5859e-08	1.58017e-06	11973	ENSMUSG00000019210	Atp6v1e1	ATPase, H+ transporting, lysosomal V1 subunit E1	NM_007510
ENSMUSG00000031924	144.148	1.58955	0.357682	4.44405	8.8283e-06	0.000241201	66427	ENSMUSG00000031924	Cyb5b	cytochrome b5 type B	NM_025558
ENSMUSG00000074102	22.7909	1.58857	0.462336	3.43597	0.000590447	0.00713961	109095	ENSMUSG00000074102	Rbm15b	RNA binding motif protein 15B	NM_175402
ENSMUSG00000032667	363.273	1.58165	0.357159	4.42842	9.49279e-06	0.000256793	330260	ENSMUSG00000032667	Pon2	paraoxonase 2	NM_183308
ENSMUSG00000028164	96.7088	1.56731	0.409358	3.82871	0.000128816	0.00212552	110173	ENSMUSG00000028164	Manba	mannosidase, beta A, lysosomal	NM_027288
ENSMUSG00000023048	699.969	1.56651	0.373601	4.19301	2.75274e-05	0.000590589	66151	ENSMUSG00000023048	Prr13	proline rich 13	NM_001170911
ENSMUSG00000020120	685.816	1.53626	0.397264	3.86711	0.000110135	0.00188441	56193	ENSMUSG00000020120	Plek	pleckstrin	NM_019549
ENSMUSG00000025027	159.432	1.51866	0.384924	3.94534	7.96859e-05	0.00145045	170750	ENSMUSG00000025027	Xpnpep1	X-prolyl aminopeptidase (aminopeptidase P) 1, soluble	NM_133216
ENSMUSG00000026470	112.272	1.51842	0.352805	4.30387	1.67842e-05	0.000397478	58244	ENSMUSG00000026470	Stx6	syntaxin 6	NM_021433
ENSMUSG00000026192	80.8249	1.51241	0.4144	3.64963	0.000262615	0.00380792	108147	ENSMUSG00000026192	Atic	5-aminoimidazole-4-carboxamide ribonucleotide formyltransferase/IMP cyclohydrolase	NM_026195
ENSMUSG00000030659	252.946	1.4948	0.38587	3.87386	0.000107126	0.00184911	53322	ENSMUSG00000030659	Nucb2	nucleobindin 2	NM_001130479
ENSMUSG00000034868	785.952	1.485	0.356558	4.16483	3.11585e-05	0.000653867	67938	ENSMUSG00000034868	Myl12b	myosin, light chain 12B, regulatory	NM_023402
ENSMUSG00000021036	331.382	1.47965	0.308485	4.79649	1.61467e-06	5.88457e-05	20773	ENSMUSG00000021036	Sptlc2	serine palmitoyltransferase, long chain base subunit 2	NM_011479
ENSMUSG00000068264	101.931	1.47078	0.373131	3.94173	8.08959e-05	0.00146617	69596	ENSMUSG00000068264	Ap5s1	adaptor-related protein 5 complex, sigma 1 subunit	NM_001291031
ENSMUSG00000053604	84.763	1.46716	0.37978	3.86319	0.000111915	0.00191008	19895	ENSMUSG00000053604	Rpia	ribose 5-phosphate isomerase A	NM_009075
ENSMUSG00000005198	318.609	1.43649	0.327755	4.38282	1.17153e-05	0.000302564	20020	ENSMUSG00000005198	Polr2a	polymerase (RNA) II (DNA directed) polypeptide A	NM_001291068
ENSMUSG00000027465	279.951	1.42971	0.274622	5.2061	1.92853e-07	9.56439e-06	67231	ENSMUSG00000027465	Tbc1d20	TBC1 domain family, member 20	NM_024196
ENSMUSG00000021820	198.836	1.42968	0.349435	4.0914	4.28779e-05	0.00085806	12325	ENSMUSG00000021820	Camk2g	calcium/calmodulin-dependent protein kinase II gamma	NM_001039138
ENSMUSG00000013160	621.062	1.40814	0.390984	3.60153	0.000316353	0.00441849	11972	ENSMUSG00000013160	Atp6v0d1	ATPase, H+ transporting, lysosomal V0 subunit D1	NM_013477
ENSMUSG00000015889	170.091	1.38303	0.352534	3.9231	8.74163e-05	0.00156617	16993	ENSMUSG00000015889	Lta4h	leukotriene A4 hydrolase	NM_001313897
ENSMUSG00000020456	276.481	1.38163	0.281825	4.90245	9.46487e-07	3.76614e-05	18293	ENSMUSG00000020456	Ogdh	oxoglutarate (alpha-ketoglutarate) dehydrogenase (lipoamide)	NM_001252282
ENSMUSG00000025745	255.72	1.36632	0.292578	4.66993	3.01304e-06	0.000100347	97212	ENSMUSG00000025745	Hadha	hydroxyacyl-Coenzyme A dehydrogenase/3-ketoacyl-Coenzyme A thiolase/enoyl-Coenzyme A hydratase (trifunctional protein), alpha subunit	NM_178878
ENSMUSG00000021877	350.707	1.36314	0.399165	3.41498	0.000637868	0.00759867	11843	ENSMUSG00000021877	Arf4	ADP-ribosylation factor 4	NM_007479
ENSMUSG00000036966	85.3619	1.36204	0.371285	3.66844	0.000244038	0.00357643	223918	ENSMUSG00000036966	Spryd3	SPRY domain containing 3	NM_001033277
ENSMUSG00000032508	295.867	1.35801	0.38349	3.54118	0.000398347	0.00526492	17874	ENSMUSG00000032508	Myd88	myeloid differentiation primary response gene 88	NM_010851
ENSMUSG00000063410	263.498	1.35791	0.36569	3.71327	0.000204597	0.00310135	223255	ENSMUSG00000063410	Stk24	serine/threonine kinase 24	NM_145465
ENSMUSG00000037601	399.703	1.3428	0.330854	4.05859	4.9369e-05	0.000957571	18102	ENSMUSG00000037601	Nme1	NME/NM23 nucleoside diphosphate kinase 1	NM_008704
ENSMUSG00000029777	259.203	1.33752	0.389337	3.43539	0.000591703	0.00714849	353172	ENSMUSG00000029777	Gars	glycyl-tRNA synthetase	NM_180678
ENSMUSG00000034187	182.963	1.33041	0.397998	3.34275	0.000829527	0.00936073	18195	ENSMUSG00000034187	Nsf	N-ethylmaleimide sensitive fusion protein	NM_008740
ENSMUSG00000018326	1446.16	1.32692	0.273355	4.85419	1.20878e-06	4.6872e-05	54401	ENSMUSG00000018326	Ywhab	tyrosine 3-monooxygenase/tryptophan 5-monooxygenase activation protein, beta polypeptide	NM_018753
ENSMUSG00000029234	127.607	1.32476	0.38582	3.43363	0.000595565	0.00718263	21982	ENSMUSG00000029234	Tmem165	transmembrane protein 165	NM_011626
ENSMUSG00000042129	574.617	1.32091	0.390739	3.38054	0.000723436	0.00838475	213391	ENSMUSG00000042129	Rassf4	Ras association (RalGDS/AF-6) domain family member 4	NM_178045
ENSMUSG00000024758	686.252	1.31904	0.392786	3.35817	0.000784601	0.00894969	20168	ENSMUSG00000024758	Rtn3	reticulon 3	NM_001003930
ENSMUSG00000024856	705.724	1.30447	0.349462	3.73279	0.000189368	0.00291243	52004	ENSMUSG00000024856	Cdk2ap2	CDK2-associated protein 2	NM_026373
ENSMUSG00000018848	104.944	1.29916	0.338405	3.83908	0.000123497	0.00205239	104458	ENSMUSG00000018848	Rars	arginyl-tRNA synthetase	NM_025936
ENSMUSG00000028670	424.075	1.29915	0.292976	4.43434	9.23553e-06	0.000251285	26394	ENSMUSG00000028670	Lypla2	lysophospholipase 2	NM_011942
ENSMUSG00000041958	196.447	1.29605	0.261859	4.94942	7.4434e-07	3.08743e-05	276846	ENSMUSG00000041958	Pigs	phosphatidylinositol glycan anchor biosynthesis, class S	NM_201406
ENSMUSG00000025647	803.44	1.28276	0.335899	3.81888	0.00013406	0.00219762	66940	ENSMUSG00000025647	Shisa5	shisa family member 5	NM_001284332
ENSMUSG00000030096	595.069	1.23324	0.355844	3.46567	0.000528909	0.00659955	21366	ENSMUSG00000030096	Slc6a6	solute carrier family 6 (neurotransmitter transporter, taurine), member 6	NM_009320
ENSMUSG00000031887	112.336	1.23116	0.358215	3.43694	0.000588322	0.00712651	71609	ENSMUSG00000031887	Tradd	TNFRSF1A-associated via death domain	NM_001033161
ENSMUSG00000005312	231.438	1.2227	0.34942	3.49922	0.000466628	0.00599011	56085	ENSMUSG00000005312	Ubqln1	ubiquilin 1	NM_026842
ENSMUSG00000046032	108.163	1.22244	0.353653	3.45661	0.000547008	0.00675973	55988	ENSMUSG00000046032	Snx12	sorting nexin 12	NM_001110310
ENSMUSG00000022952	588.01	1.21273	0.303503	3.99576	6.44872e-05	0.00121084	12394	ENSMUSG00000022952	Runx1	runt related transcription factor 1	NM_001111021
ENSMUSG00000018583	257.71	1.21115	0.322447	3.75611	0.000172573	0.00269041	27041	ENSMUSG00000018583	G3bp1	GTPase activating protein (SH3 domain) binding protein 1	NM_013716
ENSMUSG00000066440	82.8907	1.20758	0.308073	3.91977	8.86328e-05	0.00158176	211978	ENSMUSG00000066440	Zfyve26	zinc finger, FYVE domain containing 26	NM_001008550
ENSMUSG00000078652	144.093	1.20429	0.325469	3.70017	0.000215453	0.00321956	19192	ENSMUSG00000078652	Psme3	proteaseome (prosome, macropain) activator subunit 3 (PA28 gamma, Ki)	NM_011192
ENSMUSG00000029038	290.694	1.20238	0.271754	4.42452	9.66575e-06	0.000260443	68991	ENSMUSG00000029038	Ssu72	Ssu72 RNA polymerase II CTD phosphatase homolog (yeast)	NM_026899
ENSMUSG00000037710	94.0353	1.1959	0.354609	3.37244	0.000745062	0.0085773	52637	ENSMUSG00000037710	Cisd1	CDGSH iron sulfur domain 1	NM_134007
ENSMUSG00000060904	131.849	1.19057	0.29181	4.07995	4.50457e-05	0.000894899	104303	ENSMUSG00000060904	Arl1	ADP-ribosylation factor-like 1	NM_025859
ENSMUSG00000059447	131.891	1.18934	0.357997	3.3222	0.000893106	0.00989865	231086	ENSMUSG00000059447	Hadhb	hydroxyacyl-Coenzyme A dehydrogenase/3-ketoacyl-Coenzyme A thiolase/enoyl-Coenzyme A hydratase (trifunctional protein), beta subunit	NM_001289798
ENSMUSG00000046062	188.732	1.18278	0.263707	4.48521	7.2842e-06	0.000206863	108954	ENSMUSG00000046062	Ppp1r15b	protein phosphatase 1, regulatory subunit 15B	NM_133819
ENSMUSG00000056952	119.814	1.18248	0.345448	3.42304	0.000619251	0.00742234	381801	ENSMUSG00000056952	Tatdn2	TatD DNase domain containing 2	NM_001033463
ENSMUSG00000002580	526.276	1.16986	0.278814	4.19586	2.71832e-05	0.000586884	103742	ENSMUSG00000002580	Mien1	migration and invasion enhancer 1	NM_025559
ENSMUSG00000029064	391.196	1.15169	0.310664	3.7072	0.000209563	0.00315219	14688	ENSMUSG00000029064	Gnb1	guanine nucleotide binding protein (G protein), beta 1	NM_001160016
ENSMUSG00000041360	103.319	1.14834	0.336798	3.40957	0.00065065	0.00769211	52874	ENSMUSG00000041360	Pum3	pumilio RNA-binding family member 3	NM_177474
ENSMUSG00000003528	284.007	1.14685	0.318012	3.6063	0.000310594	0.00434704	13358	ENSMUSG00000003528	Slc25a1	solute carrier family 25 (mitochondrial carrier, citrate transporter), member 1	NM_153150
ENSMUSG00000055943	404.2	1.14421	0.3199	3.57676	0.000347873	0.00471922	73024	ENSMUSG00000055943	Emc7	ER membrane protein complex subunit 7	NM_133749
ENSMUSG00000031207	588.064	1.13436	0.327209	3.46678	0.000526732	0.00658667	17698	ENSMUSG00000031207	Msn	moesin	NM_010833
ENSMUSG00000022295	258.746	1.11056	0.334473	3.32032	0.000899159	0.00994971	66335	ENSMUSG00000022295	Atp6v1c1	ATPase, H+ transporting, lysosomal V1 subunit C1	NM_025494
ENSMUSG00000021814	195.436	1.10697	0.272426	4.06337	4.83687e-05	0.000951251	11750	ENSMUSG00000021814	Anxa7	annexin A7	NM_001110794
ENSMUSG00000015575	551.91	1.08713	0.304343	3.57204	0.000354208	0.00478146	11974	ENSMUSG00000015575	Atp6v0e	ATPase, H+ transporting, lysosomal V0 subunit E	NM_025272
ENSMUSG00000003131	131.63	1.08416	0.284915	3.80521	0.000141686	0.00228433	18475	ENSMUSG00000003131	Pafah1b2	platelet-activating factor acetylhydrolase, isoform 1b, subunit 2	NM_001357238
ENSMUSG00000006998	135.09	1.07045	0.274665	3.8973	9.72716e-05	0.00171579	21762	ENSMUSG00000006998	Psmd2	proteasome (prosome, macropain) 26S subunit, non-ATPase, 2	NM_134101
ENSMUSG00000025354	93.9431	1.06189	0.319947	3.31896	0.000903527	0.00998182	74330	ENSMUSG00000025354	Dnajc14	DnaJ heat shock protein family (Hsp40) member C14	NM_001359824
ENSMUSG00000077450	563.468	1.05478	0.309074	3.4127	0.00064323	0.00763047	19326	ENSMUSG00000077450	Rab11b	RAB11B, member RAS oncogene family	NM_008997
ENSMUSG00000020530	299.904	1.04917	0.309471	3.39021	0.000698385	0.00814961	217039	ENSMUSG00000020530	Ggnbp2	gametogenetin binding protein 2	NM_001364111
ENSMUSG00000021794	580.805	1.0424	0.279922	3.72389	0.000196177	0.00299028	14661	ENSMUSG00000021794	Glud1	glutamate dehydrogenase 1	NM_008133
ENSMUSG00000019173	1092.44	1.03529	0.286352	3.61545	0.000299832	0.00421708	19345	ENSMUSG00000019173	Rab5c	RAB5C, member RAS oncogene family	NM_001305003
ENSMUSG00000026687	268.826	1.0319	0.306626	3.36533	0.000764514	0.00874241	56752	ENSMUSG00000026687	Aldh9a1	aldehyde dehydrogenase 9, subfamily A1	NM_019993
ENSMUSG00000032959	115.578	1.00295	0.29633	3.38456	0.000712932	0.00827702	23980	ENSMUSG00000032959	Pebp1	phosphatidylethanolamine binding protein 1	NM_018858
ENSMUSG00000003037	349.615	1.00119	0.288213	3.47379	0.000513165	0.00646201	17274	ENSMUSG00000003037	Rab8a	RAB8A, member RAS oncogene family	NM_023126

## Sheet: microglia
	baseMean	log2FoldChange	lfcSE	stat	pvalue	padj	entrez	ensembl	symbol	genename	refseq
ENSMUSG00000031665	141.78	10.0328	0.872051	11.5048	1.24812e-30	3.27599e-28	58198	ENSMUSG00000031665	Sall1	spalt like transcription factor 1	NM_001371069
ENSMUSG00000024565	90.1726	9.98462	0.90186	11.0711	1.73167e-28	3.50101e-26	20689	ENSMUSG00000024565	Sall3	spalt like transcription factor 3	NM_001369133
ENSMUSG00000028976	282.716	9.88696	0.744602	13.2782	3.09845e-40	2.01548e-37	56485	ENSMUSG00000028976	Slc2a5	solute carrier family 2 (facilitated glucose transporter), member 5	NM_019741
ENSMUSG00000020181	59.6954	9.69906	0.652236	14.8705	5.12491e-50	7.66738e-47	260315	ENSMUSG00000020181	Nav3	neuron navigator 3	NM_001081035
ENSMUSG00000026249	231.99	9.39891	0.524916	17.9055	1.06745e-71	3.99253e-68	20720	ENSMUSG00000026249	Serpine2	serine (or cysteine) peptidase inhibitor, clade E, member 2	NM_009255
ENSMUSG00000009214	26.5769	9.17627	0.537631	17.068	2.56919e-65	6.40628e-62	66139	ENSMUSG00000009214	Mymk	myomaker, myoblast fusion factor	NM_001159602
ENSMUSG00000050138	62.8206	9.1604	0.617279	14.84	8.08013e-50	1.09897e-46	210741	ENSMUSG00000050138	Kcnk12	potassium channel, subfamily K, member 12	NM_199251
ENSMUSG00000073599	233.64	9.1061	0.794751	11.4578	2.14883e-30	5.44891e-28	68545	ENSMUSG00000073599	Ecscr	endothelial cell surface expressed chemotaxis and apoptosis regulator	NM_001033141
ENSMUSG00000049436	80.6463	8.97939	0.784063	11.4524	2.28785e-30	5.70475e-28	22268	ENSMUSG00000049436	Upk1b	uroplakin 1B	NM_178924
ENSMUSG00000018593	4340.67	8.68224	0.669496	12.9683	1.85006e-38	1.02514e-35	20692	ENSMUSG00000018593	Sparc	secreted acidic cysteine rich glycoprotein	NM_001290817
ENSMUSG00000005373	297.545	8.6581	0.716618	12.0819	1.31649e-33	4.8039e-31	58805	ENSMUSG00000005373	Mlxipl	MLX interacting protein-like	NM_001359237
ENSMUSG00000030054	125.872	8.58591	0.910823	9.42653	4.23875e-21	4.5623e-19	54368	ENSMUSG00000030054	Gp9	glycoprotein 9 (platelet)	NM_018762
ENSMUSG00000051456	24.3165	8.41994	0.487483	17.2723	7.60814e-67	2.27651e-63	56534	ENSMUSG00000051456	Hspb3	heat shock protein 3	NM_019960
ENSMUSG00000029343	583.147	8.32135	0.654222	12.7195	4.61065e-37	2.29933e-34	12960	ENSMUSG00000029343	Crybb1	crystallin, beta B1	NM_001312893
ENSMUSG00000075593	43.7138	8.28978	0.747251	11.0937	1.34595e-28	2.75847e-26	330217	ENSMUSG00000075593	Gal3st4	galactose-3-O-sulfotransferase 4	NM_001033416
ENSMUSG00000091472	11.8682	8.25618	0.704554	11.7183	1.02701e-31	3.07301e-29	#N/A	ENSMUSG00000091472	#N/A	#N/A	#N/A
ENSMUSG00000022311	20.1487	8.24781	0.557216	14.8018	1.42598e-49	1.77784e-46	239420	ENSMUSG00000022311	Csmd3	CUB and Sushi multiple domains 3	NM_001081391
ENSMUSG00000023153	35.2887	8.21936	0.891055	9.2243	2.85422e-20	2.80935e-18	69671	ENSMUSG00000023153	Tmem52	transmembrane protein 52	NM_001253856
ENSMUSG00000089797	11.5917	7.91353	0.705723	11.2134	3.50596e-29	7.49323e-27	102632420	ENSMUSG00000089797	Gm16118	predicted gene 16118	XR_879217
ENSMUSG00000010476	15.3615	7.78607	0.870747	8.94183	3.82789e-19	3.38542e-17	13593	ENSMUSG00000010476	Ebf3	early B cell factor 3	NM_001113414
ENSMUSG00000072966	9.57658	7.76291	0.652901	11.8899	1.3361e-32	4.54303e-30	245607	ENSMUSG00000072966	Gprasp2	G protein-coupled receptor associated sorting protein 2	NM_001163015
ENSMUSG00000061808	81.066	7.64192	1.27278	6.0041	1.92394e-09	3.82258e-08	22139	ENSMUSG00000061808	Ttr	transthyretin	NM_013697
ENSMUSG00000069763	46.5341	7.62731	0.762049	10.0089	1.39237e-23	1.96522e-21	67888	ENSMUSG00000069763	Tmem100	transmembrane protein 100	NM_026433
ENSMUSG00000049538	9.73332	7.46641	0.888278	8.40549	4.26082e-17	3.00689e-15	271127	ENSMUSG00000049538	Adamts16	a disintegrin-like and metallopeptidase (reprolysin type) with thrombospondin type 1 motif, 16	NM_172053
ENSMUSG00000038486	23.4221	7.35602	1.02704	7.16237	7.92913e-13	2.88632e-11	64051	ENSMUSG00000038486	Sv2a	synaptic vesicle glycoprotein 2 a	NM_022030
ENSMUSG00000035686	66.8129	7.09354	0.863929	8.21079	2.19738e-16	1.37552e-14	21835	ENSMUSG00000035686	Thrsp	thyroid hormone responsive	NM_009381
ENSMUSG00000053062	70.815	7.06207	0.724866	9.74259	1.98433e-22	2.47396e-20	67374	ENSMUSG00000053062	Jam2	junction adhesion molecule 2	NM_023844
ENSMUSG00000012819	30.2147	7.02086	0.677313	10.3658	3.54957e-25	5.36415e-23	22295	ENSMUSG00000012819	Cdh23	cadherin 23 (otocadherin)	NM_001252635
ENSMUSG00000042246	11.9748	6.987	0.9084	7.69154	1.45371e-14	6.92643e-13	209760	ENSMUSG00000042246	Tmc7	transmembrane channel-like gene family 7	NM_172476
ENSMUSG00000060402	20.9715	6.90592	1.15971	5.95489	2.60248e-09	5.04349e-08	68947	ENSMUSG00000060402	Chst8	carbohydrate sulfotransferase 8	NM_175140
ENSMUSG00000029581	397.338	6.80072	0.698878	9.73092	2.22581e-22	2.72953e-20	14086	ENSMUSG00000029581	Fscn1	fascin actin-bundling protein 1	NM_007984
ENSMUSG00000072720	47.776	6.73818	1.26938	5.30823	1.10695e-07	1.49873e-06	74376	ENSMUSG00000072720	Myo18b	myosin XVIIIb	NM_028901
ENSMUSG00000048895	80.4381	6.69538	0.534172	12.5341	4.85599e-36	2.07573e-33	12569	ENSMUSG00000048895	Cdk5r1	cyclin-dependent kinase 5, regulatory subunit 1 (p35)	NM_009871
ENSMUSG00000016494	113.049	6.68378	0.647734	10.3187	5.79991e-25	8.50711e-23	12490	ENSMUSG00000016494	Cd34	CD34 antigen	NM_001111059
ENSMUSG00000021983	21.3885	6.46049	0.974888	6.62691	3.42797e-11	9.90075e-10	50769	ENSMUSG00000021983	Atp8a2	ATPase, aminophospholipid transporter-like, class I, type 8A, member 2	NM_015803
ENSMUSG00000022332	18.3426	6.41018	0.974405	6.57856	4.75027e-11	1.32839e-09	13992	ENSMUSG00000022332	Khdrbs3	KH domain containing, RNA binding, signal transduction associated 3	NM_010158
ENSMUSG00000032609	91.9012	6.35927	0.601625	10.5702	4.09789e-26	6.88998e-24	78267	ENSMUSG00000032609	Klhdc8b	kelch domain containing 8B	NM_001359428
ENSMUSG00000031990	12.5562	6.3025	0.768698	8.19893	2.42536e-16	1.50564e-14	83964	ENSMUSG00000031990	Jam3	junction adhesion molecule 3	NM_023277
ENSMUSG00000023328	38.8574	6.24579	0.890186	7.01628	2.2786e-12	7.72684e-11	11423	ENSMUSG00000023328	Ache	acetylcholinesterase	NM_001290010
ENSMUSG00000020689	38.0141	6.24006	0.736184	8.47622	2.32626e-17	1.67323e-15	16416	ENSMUSG00000020689	Itgb3	integrin beta 3	NM_016780
ENSMUSG00000048126	9.80327	6.05166	1.06416	5.68679	1.29449e-08	2.17606e-07	12835	ENSMUSG00000048126	Col6a3	collagen, type VI, alpha 3	NM_001243008
ENSMUSG00000035104	27.0546	5.98578	0.961527	6.22528	4.80682e-10	1.09127e-08	232146	ENSMUSG00000035104	Eva1a	eva-1 homolog A (C. elegans)	NM_145570
ENSMUSG00000036353	1880.05	5.83776	0.439838	13.2725	3.34055e-40	2.08241e-37	70839	ENSMUSG00000036353	P2ry12	purinergic receptor P2Y, G-protein coupled 12	NM_001357007
ENSMUSG00000027217	36.492	5.72283	1.33604	4.28344	1.84028e-05	0.000146216	241556	ENSMUSG00000027217	Tspan18	tetraspanin 18	NM_183180
ENSMUSG00000063873	24.2286	5.71777	0.899845	6.35418	2.09544e-10	5.12254e-09	94249	ENSMUSG00000063873	Slc24a3	solute carrier family 24 (sodium/potassium/calcium exchanger), member 3	NM_001356497
ENSMUSG00000038963	45.5595	5.68448	1.13741	4.99772	5.80115e-07	6.94884e-06	108115	ENSMUSG00000038963	Slco4a1	solute carrier organic anion transporter family, member 4a1	NM_001355218
ENSMUSG00000022537	51.3226	5.51494	1.04462	5.27935	1.29641e-07	1.73952e-06	224090	ENSMUSG00000022537	Tmem44	transmembrane protein 44	NM_001357413
ENSMUSG00000058254	121.104	5.4854	0.650565	8.43174	3.4055e-17	2.42618e-15	21912	ENSMUSG00000058254	Tspan7	tetraspanin 7	NM_019634
ENSMUSG00000009731	64.2757	5.47796	0.697907	7.84913	4.18923e-15	2.1708e-13	16506	ENSMUSG00000009731	Kcnd1	potassium voltage-gated channel, Shal-related family, member 1	NM_008423
ENSMUSG00000026303	137.84	5.45951	0.879907	6.20464	5.48222e-10	1.22235e-08	171531	ENSMUSG00000026303	Mlph	melanophilin	NM_053015
ENSMUSG00000030246	275.643	5.43467	0.702709	7.73389	1.04309e-14	5.1846e-13	16832	ENSMUSG00000030246	Ldhb	lactate dehydrogenase B	NM_001302765
ENSMUSG00000032717	34.0478	5.34544	0.906064	5.89963	3.64311e-09	6.89058e-08	17240	ENSMUSG00000032717	Mdfi	MyoD family inhibitor	NM_001109973
ENSMUSG00000022415	251.793	5.29452	0.712491	7.43099	1.07788e-13	4.45472e-12	20972	ENSMUSG00000022415	Syngr1	synaptogyrin 1	NM_009303
ENSMUSG00000039137	142.828	5.23432	0.940854	5.56337	2.64618e-08	4.15419e-07	73750	ENSMUSG00000039137	Whrn	whirlin	NM_001008791
ENSMUSG00000044626	60.1378	5.18173	0.962473	5.38377	7.29423e-08	1.02952e-06	239759	ENSMUSG00000044626	Liph	lipase, member H	NM_001083894
ENSMUSG00000038463	16.0766	5.15405	0.790634	6.51889	7.08307e-11	1.91627e-09	320078	ENSMUSG00000038463	Olfml2b	olfactomedin-like 2B	NM_177068
ENSMUSG00000051504	1540.06	5.14721	0.722155	7.12756	1.02164e-12	3.63058e-11	233274	ENSMUSG00000051504	Siglech	sialic acid binding Ig-like lectin H	NM_001310738
ENSMUSG00000054675	3916.18	5.14709	1.00796	5.10643	3.28308e-07	4.12465e-06	231633	ENSMUSG00000054675	Tmem119	transmembrane protein 119	NM_146162
ENSMUSG00000045672	315.197	5.11301	0.905769	5.64493	1.65247e-08	2.70193e-07	373864	ENSMUSG00000045672	Col27a1	collagen, type XXVII, alpha 1	NM_025685
ENSMUSG00000042233	17.5579	4.91872	0.946023	5.19937	1.99964e-07	2.60825e-06	#N/A	ENSMUSG00000042233	#N/A	#N/A	#N/A
ENSMUSG00000036040	11.0477	4.88727	1.30932	3.73267	0.000189461	0.0011229	77794	ENSMUSG00000036040	Adamtsl2	ADAMTS-like 2	NM_029981
ENSMUSG00000064023	89.4873	4.87156	0.77089	6.31939	2.62595e-10	6.29597e-09	259277	ENSMUSG00000064023	Klk8	kallikrein related-peptidase 8	NM_001324398
ENSMUSG00000027848	2292.07	4.86363	0.90835	5.35436	8.58619e-08	1.18943e-06	99543	ENSMUSG00000027848	Olfml3	olfactomedin-like 3	NM_133859
ENSMUSG00000024168	38.2974	4.81361	0.798272	6.03004	1.63919e-09	3.32754e-08	407831	ENSMUSG00000024168	Tmem204	transmembrane protein 204	NM_001001183
ENSMUSG00000027221	36.9294	4.78079	0.84883	5.63222	1.77908e-08	2.88373e-07	76969	ENSMUSG00000027221	Chst1	carbohydrate sulfotransferase 1	NM_001356552
ENSMUSG00000040276	20.1249	4.73291	1.11891	4.22992	2.33772e-05	0.000180057	23969	ENSMUSG00000040276	Pacsin1	protein kinase C and casein kinase substrate in neurons 1	NM_001286743
ENSMUSG00000020541	17.0496	4.73132	1.05451	4.48674	7.23212e-06	6.47903e-05	71943	ENSMUSG00000020541	Tom1l1	target of myb1-like 1 (chicken)	NM_001357543
ENSMUSG00000025207	40.3093	4.70475	1.47156	3.19712	0.00138809	0.00616968	26456	ENSMUSG00000025207	Sema4g	sema domain, immunoglobulin domain (Ig), transmembrane domain (TM) and short cytoplasmic domain, (semaphorin) 4G	NM_011976
ENSMUSG00000027784	25.8899	4.70458	0.624865	7.52896	5.11461e-14	2.2309e-12	242083	ENSMUSG00000027784	Ppm1l	protein phosphatase 1 (formerly 2C)-like	NM_178726
ENSMUSG00000085912	14.6652	4.66849	1.12741	4.1409	3.45942e-05	0.000252964	100504267	ENSMUSG00000085912	Trp53cor1	tumor protein p53 pathway corepressor 1	NR_036469
ENSMUSG00000076431	282.979	4.60897	0.781063	5.9009	3.61528e-09	6.84793e-08	20677	ENSMUSG00000076431	Sox4	SRY (sex determining region Y)-box 4	NM_009238
ENSMUSG00000040229	450.341	4.48848	0.519399	8.64167	5.53956e-18	4.33913e-16	23890	ENSMUSG00000040229	Gpr34	G protein-coupled receptor 34	NM_011823
ENSMUSG00000028073	12.875	4.47283	0.861208	5.19368	2.06182e-07	2.68701e-06	73182	ENSMUSG00000028073	Pear1	platelet endothelial aggregation receptor 1	NM_001032413
ENSMUSG00000051652	144.166	4.4296	1.25957	3.51677	0.000436835	0.00230285	237387	ENSMUSG00000051652	Lrrc3	leucine rich repeat containing 3	NM_145152
ENSMUSG00000021556	819.587	4.35392	0.440127	9.89244	4.48957e-23	6.10623e-21	105348	ENSMUSG00000021556	Golm1	golgi membrane protein 1	NM_001035122
ENSMUSG00000026817	27.6182	4.35076	0.98543	4.41509	1.0097e-05	8.66174e-05	11636	ENSMUSG00000026817	Ak1	adenylate kinase 1	NM_001198790
ENSMUSG00000020787	20.5116	4.34551	0.841491	5.16406	2.41654e-07	3.12209e-06	18436	ENSMUSG00000020787	P2rx1	purinergic receptor P2X, ligand-gated ion channel, 1	NM_008771
ENSMUSG00000031785	653.737	4.26767	0.895503	4.76567	1.88231e-06	1.97623e-05	14766	ENSMUSG00000031785	Adgrg1	adhesion G protein-coupled receptor G1	NM_001198894
ENSMUSG00000000562	90.2829	4.26218	0.843762	5.0514	4.38576e-07	5.36073e-06	11542	ENSMUSG00000000562	Adora3	adenosine A3 receptor	NM_009631
ENSMUSG00000066975	165.3	4.24614	0.746436	5.68855	1.28122e-08	2.1586e-07	12959	ENSMUSG00000066975	Cryba4	crystallin, beta A4	NM_001312884
ENSMUSG00000032010	366.715	4.2126	0.587144	7.17474	7.24462e-13	2.65654e-11	53376	ENSMUSG00000032010	Usp2	ubiquitin specific peptidase 2	NM_016808
ENSMUSG00000048163	7288.9	4.18202	0.224158	18.6566	1.11598e-77	5.56537e-74	20345	ENSMUSG00000048163	Selplg	selectin, platelet (p-selectin) ligand	NM_009151
ENSMUSG00000002190	20.2106	4.17488	0.651491	6.40819	1.47254e-10	3.74671e-09	12745	ENSMUSG00000002190	Clgn	calmegin	NM_001329627
ENSMUSG00000026748	584.585	4.14841	0.661159	6.27445	3.50874e-10	8.26682e-09	67448	ENSMUSG00000026748	Plxdc2	plexin domain containing 2	NM_026162
ENSMUSG00000030124	267.992	4.08632	0.757609	5.3937	6.9021e-08	9.80649e-07	16768	ENSMUSG00000030124	Lag3	lymphocyte-activation gene 3	NM_008479
ENSMUSG00000060512	100.286	4.08567	0.683401	5.97843	2.25297e-09	4.39462e-08	76261	ENSMUSG00000060512	0610040J01Rik	RIKEN cDNA 0610040J01 gene	NM_029554
ENSMUSG00000063234	123.458	4.03831	0.656484	6.15142	7.67937e-10	1.646e-08	80910	ENSMUSG00000063234	Gpr84	G protein-coupled receptor 84	NM_030720
ENSMUSG00000063253	96.6323	4.03337	0.405511	9.94638	2.61529e-23	3.6229e-21	56367	ENSMUSG00000063253	Scoc	short coiled-coil protein	NM_001039137
ENSMUSG00000021665	4641.25	4.03152	0.612367	6.58351	4.59479e-11	1.29128e-09	15212	ENSMUSG00000021665	Hexb	hexosaminidase B	NM_010422
ENSMUSG00000023992	2067.5	4.00735	0.702547	5.70403	1.17007e-08	1.97802e-07	83433	ENSMUSG00000023992	Trem2	triggering receptor expressed on myeloid cells 2	NM_001272078
ENSMUSG00000021384	677.171	4.0056	0.519575	7.70937	1.26437e-14	6.14162e-13	66329	ENSMUSG00000021384	Susd3	sushi domain containing 3	NM_001360772
ENSMUSG00000041992	31.3145	3.99547	0.902838	4.42545	9.62417e-06	8.32563e-05	217944	ENSMUSG00000041992	Rapgef5	Rap guanine nucleotide exchange factor (GEF) 5	NM_001373989
ENSMUSG00000056091	127.466	3.99532	0.630764	6.3341	2.38727e-10	5.76994e-09	20454	ENSMUSG00000056091	St3gal5	ST3 beta-galactoside alpha-2,3-sialyltransferase 5	NM_001035228
ENSMUSG00000046668	398.94	3.98025	0.702242	5.66792	1.44541e-08	2.39212e-07	67393	ENSMUSG00000046668	Cxxc5	CXXC finger 5	NM_001357458
ENSMUSG00000023009	102.524	3.94658	0.483117	8.169	3.10959e-16	1.90666e-14	380969	ENSMUSG00000023009	Nckap5l	NCK-associated protein 5-like	NM_001001884
ENSMUSG00000072693	12.96	3.91265	1.2087	3.23707	0.00120762	0.00548824	#N/A	ENSMUSG00000072693	#N/A	#N/A	#N/A
ENSMUSG00000045287	333.43	3.88935	0.891474	4.36283	1.28391e-05	0.00010725	237847	ENSMUSG00000045287	Rtn4rl1	reticulon 4 receptor-like 1	NM_177708
ENSMUSG00000064141	18.9278	3.86214	0.680449	5.67588	1.3798e-08	2.29625e-07	381549	ENSMUSG00000064141	Zfp69	zinc finger protein 69	NM_001005788
ENSMUSG00000007207	14.9561	3.84421	0.82955	4.63409	3.5851e-06	3.48064e-05	20907	ENSMUSG00000007207	Stx1a	syntaxin 1A (brain)	NM_001359179
ENSMUSG00000079056	32.1505	3.84189	0.611819	6.27945	3.39769e-10	8.01781e-09	56461	ENSMUSG00000079056	Kcnip3	Kv channel interacting protein 3, calsenilin	NM_001111331
ENSMUSG00000004562	235.087	3.80333	0.701461	5.42201	5.8931e-08	8.55987e-07	268739	ENSMUSG00000004562	Arhgef40	Rho guanine nucleotide exchange factor (GEF) 40	NM_001145921
ENSMUSG00000039013	31.4388	3.75309	0.60052	6.24972	4.11177e-10	9.53738e-09	233186	ENSMUSG00000039013	Siglecf	sialic acid binding Ig-like lectin F	NM_001271019
ENSMUSG00000052336	2289.53	3.75005	0.820687	4.56941	4.89105e-06	4.57916e-05	13051	ENSMUSG00000052336	Cx3cr1	chemokine (C-X3-C motif) receptor 1	NM_009987
ENSMUSG00000004631	88.9282	3.74662	0.952951	3.9316	8.43836e-05	0.000558859	20392	ENSMUSG00000004631	Sgce	sarcoglycan, epsilon	NM_001130188
ENSMUSG00000052698	46.3024	3.73275	0.914239	4.08291	4.44757e-05	0.000316105	70549	ENSMUSG00000052698	Tln2	talin 2	NM_001081242
ENSMUSG00000019996	20.1881	3.73123	0.779285	4.78802	1.68439e-06	1.79616e-05	17761	ENSMUSG00000019996	Map7	microtubule-associated protein 7	NM_001198635
ENSMUSG00000036995	42.2408	3.70826	0.941236	3.93977	8.15586e-05	0.000541108	230837	ENSMUSG00000036995	Asap3	ArfGAP with SH3 domain, ankyrin repeat and PH domain 3	NM_001008232
ENSMUSG00000027956	13.1562	3.6977	0.543652	6.80159	1.03473e-11	3.24541e-10	70652	ENSMUSG00000027956	Tmem144	transmembrane protein 144	NM_027495
ENSMUSG00000013076	18.2056	3.69557	0.589733	6.26651	3.69235e-10	8.63144e-09	75723	ENSMUSG00000013076	Amotl1	angiomotin-like 1	NM_001081395
ENSMUSG00000031639	30.1203	3.63407	0.657946	5.52335	3.32588e-08	5.0982e-07	142980	ENSMUSG00000031639	Tlr3	toll-like receptor 3	NM_001357316
ENSMUSG00000000325	75.0135	3.61783	0.444502	8.13906	3.98355e-16	2.41287e-14	11877	ENSMUSG00000000325	Arvcf	armadillo repeat gene deleted in velocardiofacial syndrome	NM_001272028
ENSMUSG00000020829	127.731	3.61386	0.410516	8.80319	1.32978e-18	1.11769e-16	52466	ENSMUSG00000020829	Slc46a1	solute carrier family 46, member 1	NM_026740
ENSMUSG00000035735	76.5884	3.60678	0.662856	5.44128	5.28988e-08	7.7514e-07	269060	ENSMUSG00000035735	Dagla	diacylglycerol lipase, alpha	NM_198114
ENSMUSG00000034612	12.8913	3.58921	0.891184	4.02746	5.63817e-05	0.000391065	58250	ENSMUSG00000034612	Chst11	carbohydrate sulfotransferase 11	NM_021439
ENSMUSG00000037347	63.7917	3.57974	0.874599	4.09301	4.25811e-05	0.00030452	60322	ENSMUSG00000037347	Chst7	carbohydrate (N-acetylglucosamino) sulfotransferase 7	NM_021715
ENSMUSG00000030345	16.5579	3.56997	0.973162	3.66842	0.00024405	0.00139413	101320	ENSMUSG00000030345	Dyrk4	dual-specificity tyrosine-(Y)-phosphorylation regulated kinase 4	NM_207210
ENSMUSG00000036362	1452.35	3.5687	0.487282	7.32369	2.41235e-13	9.49767e-12	74191	ENSMUSG00000036362	P2ry13	purinergic receptor P2Y, G-protein coupled 13	NM_028808
ENSMUSG00000037972	195.041	3.55974	0.585367	6.08121	1.1928e-09	2.46145e-08	20621	ENSMUSG00000037972	Snn	stannin	NM_009223
ENSMUSG00000002007	77.0113	3.54382	0.895355	3.95801	7.55774e-05	0.000506527	56504	ENSMUSG00000002007	Srpk3	serine/arginine-rich protein specific kinase 3	NM_019684
ENSMUSG00000024349	667.557	3.51729	0.370559	9.49186	2.2695e-21	2.51511e-19	72512	ENSMUSG00000024349	Tmem173	transmembrane protein 173	NM_001289591
ENSMUSG00000028717	47.6882	3.50522	0.80592	4.34934	1.36548e-05	0.000113431	21349	ENSMUSG00000028717	Tal1	T cell acute lymphocytic leukemia 1	NM_001287388
ENSMUSG00000087006	23.7404	3.49833	0.714193	4.89829	9.6672e-07	1.09855e-05	620695	ENSMUSG00000087006	Gm13889	predicted gene 13889	NM_001145034
ENSMUSG00000073590	23.9711	3.4933	0.550883	6.34127	2.27879e-10	5.54358e-09	#N/A	ENSMUSG00000073590	#N/A	#N/A	#N/A
ENSMUSG00000022098	20.9149	3.47027	0.801414	4.33019	1.48983e-05	0.0001222	12153	ENSMUSG00000022098	Bmp1	bone morphogenetic protein 1	NM_001360021
ENSMUSG00000015852	3268.53	3.45211	0.804342	4.29184	1.77197e-05	0.000141767	80891	ENSMUSG00000015852	Fcrls	Fc receptor-like S, scavenger receptor	NM_030707
ENSMUSG00000042082	424.552	3.43408	0.534867	6.42043	1.3589e-10	3.48124e-09	11881	ENSMUSG00000042082	Arsb	arylsulfatase B	NM_009712
ENSMUSG00000053398	38.1435	3.42485	0.988805	3.46362	0.000532954	0.00272506	236539	ENSMUSG00000053398	Phgdh	3-phosphoglycerate dehydrogenase	NM_016966
ENSMUSG00000038473	16.7779	3.41716	0.78822	4.33529	1.45566e-05	0.000119857	70729	ENSMUSG00000038473	Nos1ap	nitric oxide synthase 1 (neuronal) adaptor protein	NM_001109985
ENSMUSG00000032035	65.7915	3.41526	0.619451	5.51337	3.52031e-08	5.35781e-07	23871	ENSMUSG00000032035	Ets1	E26 avian leukemia oncogene 1, 5' domain	NM_001038642
ENSMUSG00000021224	156.401	3.40939	0.347215	9.81925	9.30364e-23	1.19645e-20	18222	ENSMUSG00000021224	Numb	NUMB endocytic adaptor protein	NM_001136075
ENSMUSG00000035133	101.09	3.40309	0.629945	5.4022	6.58285e-08	9.39752e-07	11855	ENSMUSG00000035133	Arhgap5	Rho GTPase activating protein 5	NM_009706
ENSMUSG00000030516	52.2142	3.39923	0.935764	3.63258	0.000280607	0.00156882	21872	ENSMUSG00000030516	Tjp1	tight junction protein 1	NM_001163574
ENSMUSG00000016933	65.7666	3.37415	0.453145	7.44607	9.61608e-14	3.99628e-12	18803	ENSMUSG00000016933	Plcg1	phospholipase C, gamma 1	NM_021280
ENSMUSG00000028080	146.139	3.35511	0.623052	5.38496	7.24625e-08	1.02468e-06	80877	ENSMUSG00000028080	Lrba	LPS-responsive beige-like anchor	NM_001077687
ENSMUSG00000040447	50.7562	3.35105	0.924535	3.62458	0.000289431	0.00160913	216892	ENSMUSG00000040447	Spns2	spinster homolog 2	NM_001276383
ENSMUSG00000015468	27.2699	3.34977	0.885196	3.78422	0.000154194	0.000943129	18132	ENSMUSG00000015468	Notch4	notch 4	NM_010929
ENSMUSG00000046447	139.135	3.33649	0.900772	3.70403	0.000212201	0.00123434	66259	ENSMUSG00000046447	Camk2n1	calcium/calmodulin-dependent protein kinase II inhibitor 1	NM_025451
ENSMUSG00000052142	281.823	3.33174	0.521178	6.3927	1.62978e-10	4.08428e-09	320484	ENSMUSG00000052142	Rasal3	RAS protein activator like 3	NM_001347343
ENSMUSG00000062300	48.6361	3.33077	0.70502	4.72436	2.30837e-06	2.36641e-05	19294	ENSMUSG00000062300	Nectin2	nectin cell adhesion molecule 2	NM_001159724
ENSMUSG00000039953	181.485	3.31699	0.575076	5.76791	8.02591e-09	1.40604e-07	65945	ENSMUSG00000039953	Clstn1	calsyntenin 1	NM_001290989
ENSMUSG00000042328	573.335	3.31213	0.409135	8.09543	5.70614e-16	3.38768e-14	192232	ENSMUSG00000042328	Hps4	HPS4, biogenesis of lysosomal organelles complex 3 subunit 2	NM_001359853
ENSMUSG00000071042	268.451	3.30312	0.831843	3.97085	7.16174e-05	0.000482643	240168	ENSMUSG00000071042	Rasgrp3	RAS, guanyl releasing protein 3	NM_001166493
ENSMUSG00000012017	22.8431	3.28025	0.684701	4.79077	1.6614e-06	1.77291e-05	224024	ENSMUSG00000012017	Scarf2	scavenger receptor class F, member 2	NM_153790
ENSMUSG00000027111	197.707	3.2745	0.602684	5.4332	5.53531e-08	8.08728e-07	16403	ENSMUSG00000027111	Itga6	integrin alpha 6	NM_001277970
ENSMUSG00000018169	263.842	3.26531	0.521811	6.25765	3.90826e-10	9.07942e-09	17305	ENSMUSG00000018169	Mfng	MFNG O-fucosylpeptide 3-beta-N-acetylglucosaminyltransferase	NM_008595
ENSMUSG00000038816	19.0374	3.23425	0.813929	3.97363	7.07866e-05	0.000478121	54366	ENSMUSG00000038816	Ctnnal1	catenin (cadherin associated protein), alpha-like 1	NM_018761
ENSMUSG00000056476	27.8517	3.2249	0.6573	4.90629	9.28158e-07	1.06163e-05	329650	ENSMUSG00000056476	Med12l	mediator complex subunit 12-like	NM_177855
ENSMUSG00000035919	84.432	3.22257	0.674202	4.77984	1.75437e-06	1.85623e-05	319845	ENSMUSG00000035919	Bbs9	Bardet-Biedl syndrome 9 (human)	NM_001360258
ENSMUSG00000050493	84.8	3.21531	0.852165	3.77311	0.000161223	0.000980513	230766	ENSMUSG00000050493	Fam167b	family with sequence similarity 167, member B	NM_182783
ENSMUSG00000086507	198.079	3.2075	0.924039	3.47117	0.000518191	0.00266049	#N/A	ENSMUSG00000086507	#N/A	#N/A	#N/A
ENSMUSG00000048731	49.7717	3.19977	0.465111	6.87958	6.00294e-12	1.94394e-10	70772	ENSMUSG00000048731	Ggnbp1	gametogenetin binding protein 1	NM_001251881
ENSMUSG00000041642	200.579	3.19313	0.653648	4.88509	1.03384e-06	1.16471e-05	16565	ENSMUSG00000041642	Kif21b	kinesin family member 21B	NM_001039472
ENSMUSG00000033209	154.464	3.18992	0.543415	5.87013	4.35456e-09	8.08294e-08	209683	ENSMUSG00000033209	Ttc28	tetratricopeptide repeat domain 28	NM_001267622
ENSMUSG00000034245	35.3095	3.16556	0.478724	6.61248	3.77927e-11	1.0811e-09	232232	ENSMUSG00000034245	Hdac11	histone deacetylase 11	NM_144919
ENSMUSG00000063659	77.2613	3.16283	0.471888	6.70251	2.04868e-11	6.11782e-10	30928	ENSMUSG00000063659	Zbtb18	zinc finger and BTB domain containing 18	NM_001012330
ENSMUSG00000029510	31.7026	3.14875	0.713165	4.41519	1.00923e-05	8.66174e-05	71951	ENSMUSG00000029510	Gpc2	glypican 2 (cerebroglycan)	NM_172412
ENSMUSG00000014599	55.2462	3.14375	0.564087	5.57317	2.5015e-08	3.94362e-07	12977	ENSMUSG00000014599	Csf1	colony stimulating factor 1 (macrophage)	NM_001113529
ENSMUSG00000025558	15.7951	3.12864	0.836683	3.73933	0.000184511	0.00109673	105445	ENSMUSG00000025558	Dock9	dedicator of cytokinesis 9	NM_001081039
ENSMUSG00000020032	123.198	3.12817	0.590286	5.29941	1.16176e-07	1.56727e-06	77976	ENSMUSG00000020032	Nuak1	NUAK family, SNF1-like kinase, 1	NM_001004363
ENSMUSG00000031217	86.3836	3.11996	0.636184	4.90418	9.38194e-07	1.07147e-05	13641	ENSMUSG00000031217	Efnb1	ephrin B1	NM_010110
ENSMUSG00000030256	37.8574	3.10341	0.677998	4.57731	4.70986e-06	4.42893e-05	79362	ENSMUSG00000030256	Bhlhe41	basic helix-loop-helix family, member e41	NM_001271768
ENSMUSG00000028859	280.125	3.08393	0.647696	4.76138	1.9227e-06	2.01581e-05	12986	ENSMUSG00000028859	Csf3r	colony stimulating factor 3 receptor (granulocyte)	NM_001252651
ENSMUSG00000075411	48.4562	3.08169	0.680378	4.52938	5.91581e-06	5.40663e-05	#N/A	ENSMUSG00000075411	#N/A	#N/A	#N/A
ENSMUSG00000042810	36.0415	3.03417	0.464699	6.52931	6.60744e-11	1.79734e-09	77827	ENSMUSG00000042810	Krba1	KRAB-A domain containing 1	NM_001347152
ENSMUSG00000045136	16.4014	3.0097	0.754517	3.98891	6.63767e-05	0.000449603	73710	ENSMUSG00000045136	Tubb2b	tubulin, beta 2B class IIB	NM_023716
ENSMUSG00000031024	19.1262	3.00322	0.866326	3.46662	0.000527046	0.00269854	76954	ENSMUSG00000031024	St5	suppression of tumorigenicity 5	NM_001001326
ENSMUSG00000055184	24.2328	3.00248	0.6242	4.81012	1.50842e-06	1.63414e-05	108900	ENSMUSG00000055184	Fam72a	family with sequence similarity 72, member A	NM_175382
ENSMUSG00000001995	83.4435	2.99373	0.382848	7.81962	5.29827e-15	2.70537e-13	244668	ENSMUSG00000001995	Sipa1l2	signal-induced proliferation-associated 1 like 2	NM_001081337
ENSMUSG00000006435	98.4283	2.97345	0.844915	3.51923	0.000432796	0.00228558	18011	ENSMUSG00000006435	Neurl1a	neuralized E3 ubiquitin protein ligase 1A	NM_001163480
ENSMUSG00000038793	29.2247	2.95358	0.64982	4.54523	5.48765e-06	5.04924e-05	13590	ENSMUSG00000038793	Lefty1	left right determination factor 1	NM_010094
ENSMUSG00000004633	77.4024	2.95087	0.820231	3.59761	0.000321156	0.00176134	69993	ENSMUSG00000004633	Chn2	chimerin 2	NM_001163640
ENSMUSG00000029392	123.733	2.92623	0.609821	4.79852	1.59846e-06	1.71553e-05	75695	ENSMUSG00000029392	Rilpl1	Rab interacting lysosomal protein-like 1	NM_021430
ENSMUSG00000015968	71.1772	2.92374	0.711832	4.10735	4.00232e-05	0.000287602	12289	ENSMUSG00000015968	Cacna1d	calcium channel, voltage-dependent, L type, alpha 1D subunit	NM_001083616
ENSMUSG00000032402	80.0973	2.9098	0.600718	4.84387	1.27332e-06	1.40487e-05	17127	ENSMUSG00000032402	Smad3	SMAD family member 3	NM_016769
ENSMUSG00000021990	76.052	2.89153	0.548729	5.2695	1.36799e-07	1.83064e-06	219140	ENSMUSG00000021990	Spata13	spermatogenesis associated 13	NM_001033272
ENSMUSG00000041012	56.5811	2.87887	0.76779	3.74956	0.000177147	0.00106182	70031	ENSMUSG00000041012	Cmtm8	CKLF-like MARVEL transmembrane domain containing 8	NM_027294
ENSMUSG00000047473	24.9396	2.87715	0.755896	3.80628	0.000141074	0.000872981	22693	ENSMUSG00000047473	Zfp30	zinc finger protein 30	NM_001360207
ENSMUSG00000042106	249.702	2.87384	0.538592	5.33584	9.51042e-08	1.30897e-06	68176	ENSMUSG00000042106	Inka1	inka box actin regulator 1	NM_026597
ENSMUSG00000017417	136.04	2.86576	0.744911	3.84712	0.000119516	0.00075638	72324	ENSMUSG00000017417	Plxdc1	plexin domain containing 1	NM_001163608
ENSMUSG00000026425	700.403	2.85859	0.301094	9.494	2.22325e-21	2.48224e-19	14270	ENSMUSG00000026425	Srgap2	SLIT-ROBO Rho GTPase activating protein 2	NM_001081011
ENSMUSG00000066191	17.0335	2.85459	0.627809	4.54691	5.444e-06	5.02144e-05	75691	ENSMUSG00000066191	Anks6	ankyrin repeat and sterile alpha motif domain containing 6	NM_001024136
ENSMUSG00000018381	1241.01	2.8491	0.733469	3.88441	0.000102578	0.000661993	66610	ENSMUSG00000018381	Abi3	ABI gene family, member 3	NM_001163464
ENSMUSG00000032086	14.8701	2.84739	0.625265	4.5539	5.26609e-06	4.87839e-05	23821	ENSMUSG00000032086	Bace1	beta-site APP cleaving enzyme 1	NM_001145947
ENSMUSG00000020898	415.575	2.84437	0.37677	7.54935	4.37424e-14	1.93618e-12	68964	ENSMUSG00000020898	Ctc1	CTS telomere maintenance complex component 1	NM_001013256
ENSMUSG00000031438	27.6681	2.84356	0.659682	4.31051	1.6288e-05	0.000131225	66889	ENSMUSG00000031438	Rnf128	ring finger protein 128	NM_001254761
ENSMUSG00000052512	25.7457	2.84341	0.76018	3.74044	0.000183695	0.00109231	78286	ENSMUSG00000052512	Nav2	neuron navigator 2	NM_001111016
ENSMUSG00000050965	42.1669	2.83634	0.681844	4.1598	3.1852e-05	0.00023591	18750	ENSMUSG00000050965	Prkca	protein kinase C, alpha	NM_011101
ENSMUSG00000038607	30.2823	2.82892	0.479763	5.89649	3.71314e-09	7.01417e-08	14700	ENSMUSG00000038607	Gng10	guanine nucleotide binding protein (G protein), gamma 10	NM_025277
ENSMUSG00000071068	16.8763	2.8221	0.759738	3.71457	0.000203548	0.00119316	328833	ENSMUSG00000071068	Treml2	triggering receptor expressed on myeloid cells-like 2	NM_001033405
ENSMUSG00000023044	220.306	2.82145	0.361954	7.79505	6.43839e-15	3.24326e-13	246277	ENSMUSG00000023044	Csad	cysteine sulfinic acid decarboxylase	NM_001359126
ENSMUSG00000035713	45.8696	2.81583	0.50177	5.61181	2.00226e-08	3.2176e-07	244144	ENSMUSG00000035713	Usp35	ubiquitin specific peptidase 35	NM_001177412
ENSMUSG00000032300	284.179	2.81541	0.49823	5.65083	1.59676e-08	2.61369e-07	74211	ENSMUSG00000032300	1700017B05Rik	RIKEN cDNA 1700017B05 gene	NM_028820
ENSMUSG00000029330	114.068	2.80968	0.484871	5.79471	6.84402e-09	1.20605e-07	74596	ENSMUSG00000029330	Cds1	CDP-diacylglycerol synthase 1	NM_173370
ENSMUSG00000061143	111.272	2.79972	0.464742	6.02426	1.69889e-09	3.43473e-08	433586	ENSMUSG00000061143	Maml3	mastermind like transcriptional coactivator 3	NM_001004176
ENSMUSG00000042439	38.6887	2.78976	0.779551	3.57867	0.000345346	0.00187404	328977	ENSMUSG00000042439	Zfp532	zinc finger protein 532	NM_001361051
ENSMUSG00000051373	34.1392	2.78555	0.685568	4.06313	4.84194e-05	0.000341216	227721	ENSMUSG00000051373	Plpp7	phospholipid phosphatase 7 (inactive)	NM_001355238
ENSMUSG00000078700	20.8401	2.76901	0.522537	5.29917	1.16332e-07	1.56797e-06	319371	ENSMUSG00000078700	D030028A08Rik	RIKEN cDNA D030028A08 gene	NR_003293
ENSMUSG00000049577	97.7701	2.76674	0.586098	4.7206	2.35149e-06	2.39977e-05	22761	ENSMUSG00000049577	Zfpm1	zinc finger protein, multitype 1	NM_009569
ENSMUSG00000027508	194.557	2.75552	0.505607	5.44992	5.03923e-08	7.39861e-07	94212	ENSMUSG00000027508	Pag1	phosphoprotein associated with glycosphingolipid microdomains 1	NM_001195031
ENSMUSG00000028339	53.3158	2.74201	0.742412	3.69337	0.000221299	0.00128228	12819	ENSMUSG00000028339	Col15a1	collagen, type XV, alpha 1	NM_009928
ENSMUSG00000023036	86.4126	2.73634	0.357406	7.6561	1.91667e-14	8.93312e-13	93707	ENSMUSG00000023036	Pcdhgc4	protocadherin gamma subfamily C, 4	NM_033582
ENSMUSG00000035967	242.939	2.73597	0.364225	7.51177	5.83333e-14	2.51506e-12	236790	ENSMUSG00000035967	Ints6l	integrator complex subunit 6 like	NM_172779
ENSMUSG00000016477	51.043	2.72739	0.376073	7.25229	4.09769e-13	1.55994e-11	13557	ENSMUSG00000016477	E2f3	E2F transcription factor 3	NM_001289920
ENSMUSG00000038860	90.9022	2.71542	0.637524	4.25932	2.05053e-05	0.000160676	99326	ENSMUSG00000038860	Garnl3	GTPase activating RANGAP domain-like 3	NM_001355200
ENSMUSG00000028927	92.0284	2.70658	0.690589	3.91923	8.8832e-05	0.000582902	18600	ENSMUSG00000028927	Padi2	peptidyl arginine deiminase, type II	NM_008812
ENSMUSG00000024381	1937.32	2.70036	0.421134	6.41212	1.43508e-10	3.66385e-09	30948	ENSMUSG00000024381	Bin1	bridging integrator 1	NM_001083334
ENSMUSG00000084803	20.0355	2.69735	0.740564	3.64229	0.000270226	0.00151758	641454	ENSMUSG00000084803	5830444B04Rik	RIKEN cDNA 5830444B04 gene	NR_102283
ENSMUSG00000030671	124.733	2.69485	0.614435	4.3859	1.15505e-05	9.76863e-05	18576	ENSMUSG00000030671	Pde3b	phosphodiesterase 3B, cGMP-inhibited	NM_011055
ENSMUSG00000083282	290.073	2.6918	0.404141	6.66054	2.72818e-11	7.9875e-10	56464	ENSMUSG00000083282	Ctsf	cathepsin F	NM_019861
ENSMUSG00000043384	37.5978	2.68894	0.485782	5.53529	3.10713e-08	4.79555e-07	67298	ENSMUSG00000043384	Gprasp1	G protein-coupled receptor associated sorting protein 1	NM_001004359
ENSMUSG00000040699	723.052	2.68423	0.430535	6.23465	4.52792e-10	1.03266e-08	67803	ENSMUSG00000040699	Limd2	LIM domain containing 2	NM_001356458
ENSMUSG00000023008	281.733	2.67025	0.540388	4.94135	7.75818e-07	9.06797e-06	22379	ENSMUSG00000023008	Fmnl3	formin-like 3	NM_001310622
ENSMUSG00000071724	65.9622	2.66813	0.541755	4.92497	8.43722e-07	9.77763e-06	100503915	ENSMUSG00000071724	Smpd5	sphingomyelin phosphodiesterase 5	NM_001195537
ENSMUSG00000021639	138.602	2.66718	0.441665	6.03891	1.55155e-09	3.1625e-08	23894	ENSMUSG00000021639	Gtf2h2	general transcription factor II H, polypeptide 2	NM_001360706
ENSMUSG00000040093	138.918	2.66	0.403993	6.58427	4.57133e-11	1.28798e-09	171543	ENSMUSG00000040093	Bmf	BCL2 modifying factor	NM_001311140
ENSMUSG00000030737	1270.84	2.65371	0.636251	4.17086	3.03454e-05	0.000225757	101488	ENSMUSG00000030737	Slco2b1	solute carrier organic anion transporter family, member 2b1	NM_001252530
ENSMUSG00000037348	181.061	2.61983	0.387204	6.76603	1.32369e-11	4.04983e-10	71904	ENSMUSG00000037348	Paqr7	progestin and adipoQ receptor family member VII	NM_001285845
ENSMUSG00000007891	13559.4	2.61894	0.590905	4.43208	9.33297e-06	8.10862e-05	13033	ENSMUSG00000007891	Ctsd	cathepsin D	NM_009983
ENSMUSG00000026657	332.504	2.59858	0.302511	8.59005	8.69326e-18	6.50299e-16	209630	ENSMUSG00000026657	Frmd4a	FERM domain containing 4A	NM_001177843
ENSMUSG00000026181	48.2499	2.59146	0.336602	7.69888	1.37264e-14	6.60323e-13	68606	ENSMUSG00000026181	Ppm1f	protein phosphatase 1F (PP2C domain containing)	NM_176833
ENSMUSG00000048142	22.4536	2.58874	0.668866	3.87035	0.000108681	0.000696054	269642	ENSMUSG00000048142	Nat8l	N-acetyltransferase 8-like	NM_001001985
ENSMUSG00000032827	110.999	2.58232	0.747581	3.45424	0.000551855	0.00280922	243725	ENSMUSG00000032827	Ppp1r9a	protein phosphatase 1, regulatory subunit 9A	NM_001363809
ENSMUSG00000021451	126.923	2.57397	0.73182	3.51722	0.000436088	0.00230134	20354	ENSMUSG00000021451	Sema4d	sema domain, immunoglobulin domain (Ig), transmembrane domain (TM) and short cytoplasmic domain, (semaphorin) 4D	NM_001281880
ENSMUSG00000040957	117.993	2.57389	0.542963	4.74046	2.13231e-06	2.20825e-05	63955	ENSMUSG00000040957	Cables1	CDK5 and Abl enzyme substrate 1	NM_001146287
ENSMUSG00000033192	868.506	2.57241	0.565261	4.55084	5.34321e-06	4.94065e-05	270084	ENSMUSG00000033192	Lpcat2	lysophosphatidylcholine acyltransferase 2	NM_001357374
ENSMUSG00000020101	2805.23	2.57076	0.405885	6.33372	2.39319e-10	5.77492e-09	74048	ENSMUSG00000020101	Vsir	V-set immunoregulatory receptor	NM_001159572
ENSMUSG00000038235	395.625	2.56951	0.699534	3.67317	0.000239556	0.00137476	16456	ENSMUSG00000038235	F11r	F11 receptor	NM_172647
ENSMUSG00000069662	3049.92	2.56375	0.5756	4.45406	8.4263e-06	7.38091e-05	17118	ENSMUSG00000069662	Marcks	myristoylated alanine rich protein kinase C substrate	NM_008538
ENSMUSG00000006494	100.968	2.55515	0.370003	6.90574	4.99423e-12	1.63141e-10	228026	ENSMUSG00000006494	Pdk1	pyruvate dehydrogenase kinase, isoenzyme 1	NM_001360002
ENSMUSG00000045636	211.418	2.55174	0.541437	4.7129	2.44213e-06	2.48043e-05	102103	ENSMUSG00000045636	Mtus1	mitochondrial tumor suppressor 1	NM_001005863
ENSMUSG00000032202	38.6391	2.54226	0.589313	4.31394	1.60373e-05	0.000129765	11891	ENSMUSG00000032202	Rab27a	RAB27A, member RAS oncogene family	NM_001301230
ENSMUSG00000037692	24.5624	2.54132	0.43116	5.89416	3.76586e-09	7.08691e-08	230793	ENSMUSG00000037692	Ahdc1	AT hook, DNA binding motif, containing 1	NM_146155
ENSMUSG00000025583	206.664	2.53691	0.34171	7.42415	1.13508e-13	4.66537e-12	74370	ENSMUSG00000025583	Rptor	regulatory associated protein of MTOR, complex 1	NM_001306081
ENSMUSG00000019978	608.357	2.524	0.439083	5.74834	9.01229e-09	1.55876e-07	13822	ENSMUSG00000019978	Epb41l2	erythrocyte membrane protein band 4.1 like 2	NM_001199265
ENSMUSG00000023007	66.7922	2.52084	0.376231	6.70024	2.08077e-11	6.18896e-10	54614	ENSMUSG00000023007	Prpf40b	pre-mRNA processing factor 40B	NM_001348256
ENSMUSG00000045268	129.427	2.51218	0.810632	3.09903	0.00194155	0.00817547	195522	ENSMUSG00000045268	Zfp691	zinc finger protein 691	NM_001145935
ENSMUSG00000026519	194.299	2.51044	0.4583	5.47771	4.30873e-08	6.42689e-07	208795	ENSMUSG00000026519	Tmem63a	transmembrane protein 63a	NM_144794
ENSMUSG00000045038	27.1114	2.50991	0.579033	4.33466	1.45986e-05	0.000120071	18754	ENSMUSG00000045038	Prkce	protein kinase C, epsilon	NM_011104
ENSMUSG00000024451	287.027	2.50757	0.700015	3.58216	0.000340759	0.0018558	106952	ENSMUSG00000024451	Arap3	ArfGAP with RhoGAP domain, ankyrin repeat and PH domain 3	NM_001205336
ENSMUSG00000001761	29.1555	2.48618	0.818356	3.03802	0.00238138	0.00970063	319757	ENSMUSG00000001761	Smo	smoothened, frizzled class receptor	NM_176996
ENSMUSG00000027695	88.0457	2.47682	0.463828	5.33995	9.29727e-08	1.28436e-06	18805	ENSMUSG00000027695	Pld1	phospholipase D1	NM_001164056
ENSMUSG00000040270	56.3199	2.46629	0.527232	4.6778	2.89966e-06	2.88035e-05	12014	ENSMUSG00000040270	Bach2	BTB and CNC homology, basic leucine zipper transcription factor 2	NM_001109661
ENSMUSG00000022793	127.422	2.46096	0.674037	3.65107	0.000261148	0.0014738	56375	ENSMUSG00000022793	B4galt4	UDP-Gal:betaGlcNAc beta 1,4-galactosyltransferase, polypeptide 4	NM_001285793
ENSMUSG00000062175	18.8619	2.45267	0.736124	3.33188	0.000862625	0.00413778	228839	ENSMUSG00000062175	Tgif2	TGFB-induced factor homeobox 2	NM_001291124
ENSMUSG00000041773	34.9334	2.45199	0.53567	4.57742	4.70753e-06	4.42893e-05	13803	ENSMUSG00000041773	Enc1	ectodermal-neural cortex 1	NM_007930
ENSMUSG00000031749	74.7513	2.44465	0.304833	8.01965	1.06051e-15	6.05582e-14	20444	ENSMUSG00000031749	St3gal2	ST3 beta-galactoside alpha-2,3-sialyltransferase 2	NM_009179
ENSMUSG00000063382	180.157	2.44272	0.393548	6.20693	5.40281e-10	1.20644e-08	80288	ENSMUSG00000063382	Bcl9l	B cell CLL/lymphoma 9-like	NM_001357490
ENSMUSG00000029513	156.829	2.44046	0.305383	7.99148	1.33331e-15	7.4991e-14	19079	ENSMUSG00000029513	Prkab1	protein kinase, AMP-activated, beta 1 non-catalytic subunit	NM_031869
ENSMUSG00000033790	110.302	2.43594	0.393587	6.18908	6.05168e-10	1.33342e-08	233276	ENSMUSG00000033790	Tubgcp5	tubulin, gamma complex associated protein 5	NM_001360873
ENSMUSG00000006411	51.2998	2.43523	0.568923	4.28043	1.86536e-05	0.000147973	71740	ENSMUSG00000006411	Nectin4	nectin cell adhesion molecule 4	NM_001122680
ENSMUSG00000022817	1464.47	2.42349	0.583644	4.15234	3.29093e-05	0.00024242	16419	ENSMUSG00000022817	Itgb5	integrin beta 5	NM_001145884
ENSMUSG00000038023	228.02	2.42304	0.301468	8.03749	9.16969e-16	5.27645e-14	21871	ENSMUSG00000038023	Atp6v0a2	ATPase, H+ transporting, lysosomal V0 subunit A2	NM_011596
ENSMUSG00000057706	19.9645	2.40462	0.715405	3.3612	0.000776041	0.00377082	108797	ENSMUSG00000057706	Mex3b	mex3 RNA binding family member B	NM_175366
ENSMUSG00000004383	29.5846	2.40405	0.567814	4.23387	2.29701e-05	0.000177325	16795	ENSMUSG00000004383	Large1	LARGE xylosyl- and glucuronyltransferase 1	NM_001317391
ENSMUSG00000002732	22.7053	2.40375	0.538779	4.46147	8.14004e-06	7.15951e-05	14231	ENSMUSG00000002732	Fkbp7	FK506 binding protein 7	NM_001355079
ENSMUSG00000000881	20.8418	2.3945	0.703439	3.40399	0.000664092	0.00331183	53310	ENSMUSG00000000881	Dlg3	discs large MAGUK scaffold protein 3	NM_001177778
ENSMUSG00000027447	52711.3	2.38767	0.466219	5.12134	3.03374e-07	3.84317e-06	13010	ENSMUSG00000027447	Cst3	cystatin C	NM_009976
ENSMUSG00000007613	1271.3	2.37746	0.557053	4.26793	1.97293e-05	0.000155435	21812	ENSMUSG00000007613	Tgfbr1	transforming growth factor, beta receptor I	NM_001312868
ENSMUSG00000037318	102.271	2.37312	0.521699	4.54884	5.39423e-06	4.97859e-05	215243	ENSMUSG00000037318	Traf3ip3	TRAF3 interacting protein 3	NM_153137
ENSMUSG00000004933	236.553	2.36485	0.546704	4.32565	1.52086e-05	0.000124065	17179	ENSMUSG00000004933	Matk	megakaryocyte-associated tyrosine kinase	NM_001285853
ENSMUSG00000044950	111.288	2.35213	0.290885	8.08609	6.16089e-16	3.6432e-14	70802	ENSMUSG00000044950	Pwwp2a	PWWP domain containing 2A	NM_001164231
ENSMUSG00000040339	312.01	2.34616	0.333855	7.02746	2.1032e-12	7.18729e-11	329739	ENSMUSG00000040339	Fam102b	family with sequence similarity 102, member B	NM_001163567
ENSMUSG00000070476	65.8714	2.34609	0.481769	4.86975	1.11741e-06	1.24294e-05	71532	ENSMUSG00000070476	Fam217b	family with sequence similarity 217, member B	NM_001081289
ENSMUSG00000029484	437.261	2.34132	0.563091	4.15797	3.21088e-05	0.000237459	11745	ENSMUSG00000029484	Anxa3	annexin A3	NM_013470
ENSMUSG00000026930	51.7159	2.34084	0.355237	6.58953	4.41216e-11	1.25019e-09	67839	ENSMUSG00000026930	Gpsm1	G-protein signalling modulator 1 (AGS3-like, C. elegans)	NM_001199146
ENSMUSG00000043323	223.321	2.34009	0.385086	6.07681	1.22598e-09	2.52296e-08	381668	ENSMUSG00000043323	Fbrsl1	fibrosin-like 1	NM_001142642
ENSMUSG00000026933	62.6382	2.33965	0.365654	6.39854	1.56871e-10	3.95775e-09	227634	ENSMUSG00000026933	Camsap1	calmodulin regulated spectrin-associated protein 1	NM_001115076
ENSMUSG00000034656	35.7155	2.33004	0.536663	4.34172	1.41372e-05	0.000116854	12286	ENSMUSG00000034656	Cacna1a	calcium channel, voltage-dependent, P/Q type, alpha 1A subunit	NM_001252059
ENSMUSG00000000628	274.679	2.32779	0.417045	5.58161	2.38301e-08	3.77671e-07	15277	ENSMUSG00000000628	Hk2	hexokinase 2	NM_013820
ENSMUSG00000013419	17.8926	2.32778	0.677226	3.43723	0.000587701	0.00296847	270210	ENSMUSG00000013419	Zfp651	zinc finger protein 651	NM_001166644
ENSMUSG00000040722	380.457	2.31575	0.595244	3.89041	0.000100074	0.000647858	56807	ENSMUSG00000040722	Scamp5	secretory carrier membrane protein 5	NM_001301634
ENSMUSG00000032434	580.123	2.30948	0.291248	7.92961	2.19831e-15	1.20033e-13	67213	ENSMUSG00000032434	Cmtm6	CKLF-like MARVEL transmembrane domain containing 6	NM_026036
ENSMUSG00000027993	40.4801	2.30125	0.634352	3.62772	0.000285932	0.00159378	80890	ENSMUSG00000027993	Trim2	tripartite motif-containing 2	NM_001271725
ENSMUSG00000087052	19.2419	2.29852	0.655789	3.50496	0.000456671	0.00239057	#N/A	ENSMUSG00000087052	#N/A	#N/A	#N/A
ENSMUSG00000053716	208.605	2.29265	0.403373	5.6837	1.31812e-08	2.20917e-07	235584	ENSMUSG00000053716	Dusp7	dual specificity phosphatase 7	NM_153459
ENSMUSG00000069899	108.598	2.28717	0.446836	5.11859	3.07824e-07	3.88638e-06	#N/A	ENSMUSG00000069899	#N/A	#N/A	#N/A
ENSMUSG00000041920	711.46	2.27992	0.411825	5.53614	3.09209e-08	4.78228e-07	104681	ENSMUSG00000041920	Slc16a6	solute carrier family 16 (monocarboxylic acid transporters), member 6	NM_001029842
ENSMUSG00000030699	31.8282	2.27222	0.693642	3.27578	0.00105369	0.00488359	21389	ENSMUSG00000030699	Tbx6	T-box 6	NM_011538
ENSMUSG00000032870	686.076	2.27102	0.195219	11.6332	2.79416e-31	7.74137e-29	69780	ENSMUSG00000032870	Smap2	small ArfGAP 2	NM_133716
ENSMUSG00000051550	185.975	2.26709	0.412938	5.49015	4.01595e-08	6.04453e-07	68490	ENSMUSG00000051550	Zfp579	zinc finger protein 579	NM_026741
ENSMUSG00000041995	23.1147	2.26216	0.388445	5.82364	5.75811e-09	1.03917e-07	72114	ENSMUSG00000041995	Zbed3	zinc finger, BED type containing 3	NM_001302538
ENSMUSG00000028207	162.63	2.24948	0.555987	4.04593	5.21165e-05	0.000363504	65973	ENSMUSG00000028207	Asph	aspartate-beta-hydroxylase	NM_001177849
ENSMUSG00000038175	257.208	2.24904	0.338109	6.65182	2.89486e-11	8.44249e-10	218203	ENSMUSG00000038175	Mylip	myosin regulatory light chain interacting protein	NM_153789
ENSMUSG00000022747	303.452	2.24504	0.718939	3.12271	0.00179194	0.00764667	54613	ENSMUSG00000022747	St3gal6	ST3 beta-galactoside alpha-2,3-sialyltransferase 6	NM_001357433
ENSMUSG00000024426	103.07	2.24298	0.336014	6.67525	2.46812e-11	7.2403e-10	73242	ENSMUSG00000024426	Atat1	alpha tubulin acetyltransferase 1	NM_001142744
ENSMUSG00000025277	89.4163	2.23711	0.347088	6.44536	1.15323e-10	2.98504e-09	66082	ENSMUSG00000025277	Abhd6	abhydrolase domain containing 6	NM_001331064
ENSMUSG00000064181	53.5941	2.2369	0.431525	5.18371	2.1751e-07	2.82235e-06	216363	ENSMUSG00000064181	Rab3ip	RAB3A interacting protein	NM_001003950
ENSMUSG00000040272	96.3354	2.23553	0.226854	9.85446	6.55685e-23	8.68116e-21	329470	ENSMUSG00000040272	Accs	1-aminocyclopropane-1-carboxylate synthase (non-functional)	NM_001290782
ENSMUSG00000055069	29.8611	2.2322	0.609883	3.66005	0.000252168	0.0014323	270160	ENSMUSG00000055069	Rab39	RAB39, member RAS oncogene family	NM_175562
ENSMUSG00000029096	63.608	2.22635	0.593699	3.74997	0.000176854	0.00106048	78558	ENSMUSG00000029096	Htra3	HtrA serine peptidase 3	NM_001042615
ENSMUSG00000022433	731.677	2.21814	0.330307	6.7154	1.87552e-11	5.6458e-10	27373	ENSMUSG00000022433	Csnk1e	casein kinase 1, epsilon	NM_001289898
ENSMUSG00000023150	666.184	2.21791	0.400469	5.53827	3.05466e-08	4.73093e-07	117198	ENSMUSG00000023150	Ivns1abp	influenza virus NS1A binding protein	NM_001039511
ENSMUSG00000036634	77.8953	2.2071	0.627567	3.51692	0.000436583	0.00230233	17136	ENSMUSG00000036634	Mag	myelin-associated glycoprotein	NM_001346084
ENSMUSG00000038831	32.2903	2.20704	0.590415	3.73811	0.000185407	0.00110162	241308	ENSMUSG00000038831	Ralgps1	Ral GEF with PH domain and SH3 binding motif 1	NM_001290570
ENSMUSG00000025880	123.628	2.20512	0.672728	3.27788	0.00104592	0.00485825	17131	ENSMUSG00000025880	Smad7	SMAD family member 7	NM_001042660
ENSMUSG00000061393	103.373	2.20419	0.426928	5.1629	2.43156e-07	3.13879e-06	11481	ENSMUSG00000061393	Acvr2b	activin receptor IIB	NM_001313757
ENSMUSG00000041112	265.141	2.19871	0.354582	6.20085	5.61593e-10	1.24844e-08	140580	ENSMUSG00000041112	Elmo1	engulfment and cell motility 1	NM_080288
ENSMUSG00000029060	290.257	2.19471	0.304132	7.2163	5.34202e-13	2.00306e-11	76580	ENSMUSG00000029060	Mib2	mindbomb E3 ubiquitin protein ligase 2	NM_001256107
ENSMUSG00000021796	24.0238	2.19092	0.555447	3.94444	7.99882e-05	0.000531632	12166	ENSMUSG00000021796	Bmpr1a	bone morphogenetic protein receptor, type 1A	NM_009758
ENSMUSG00000004446	76.8565	2.18634	0.587704	3.72014	0.000199113	0.00117096	12122	ENSMUSG00000004446	Bid	BH3 interacting domain death agonist	NM_007544
ENSMUSG00000055485	92.7161	2.18175	0.364921	5.97869	2.24945e-09	4.39348e-08	320706	ENSMUSG00000055485	Soga1	suppressor of glucose, autophagy associated 1	NM_001164663
ENSMUSG00000052291	21.3588	2.17664	0.578863	3.76021	0.000169773	0.00102198	#N/A	ENSMUSG00000052291	#N/A	#N/A	#N/A
ENSMUSG00000030451	203.948	2.17346	0.180234	12.0591	1.73648e-33	6.18559e-31	15204	ENSMUSG00000030451	Herc2	HECT and RLD domain containing E3 ubiquitin protein ligase 2	NM_001360080
ENSMUSG00000056592	45.9765	2.17092	0.476188	4.55895	5.14096e-06	4.78023e-05	210104	ENSMUSG00000056592	Zfp658	zinc finger protein 658	NM_001008549
ENSMUSG00000021608	248.364	2.16418	0.421179	5.13839	2.77097e-07	3.53122e-06	210992	ENSMUSG00000021608	Lpcat1	lysophosphatidylcholine acyltransferase 1	NM_001368681
ENSMUSG00000049536	23.4225	2.16373	0.602709	3.59001	0.000330662	0.00180549	237052	ENSMUSG00000049536	Tceal1	transcription elongation factor A (SII)-like 1	NM_001356367
ENSMUSG00000037344	221.549	2.16102	0.287912	7.50583	6.10391e-14	2.60916e-12	83704	ENSMUSG00000037344	Slc12a9	solute carrier family 12 (potassium/chloride transporters), member 9	NM_001359611
ENSMUSG00000004270	362.34	2.14842	0.326126	6.58771	4.4667e-11	1.26326e-09	14792	ENSMUSG00000004270	Lpcat3	lysophosphatidylcholine acyltransferase 3	NM_145130
ENSMUSG00000041638	43.8645	2.14691	0.559944	3.83416	0.000125994	0.000792757	231659	ENSMUSG00000041638	Gcn1	GCN1 activator of EIF2AK4	NM_172719
ENSMUSG00000023094	90.2156	2.14181	0.421827	5.07747	3.82489e-07	4.7371e-06	76467	ENSMUSG00000023094	Msrb2	methionine sulfoxide reductase B2	NM_029619
ENSMUSG00000032549	139.001	2.14034	0.399586	5.35639	8.49003e-08	1.17829e-06	270192	ENSMUSG00000032549	Rab6b	RAB6B, member RAS oncogene family	NM_173781
ENSMUSG00000027646	74.2435	2.13711	0.624338	3.423	0.000619343	0.00311044	20779	ENSMUSG00000027646	Src	Rous sarcoma oncogene	NM_001025395
ENSMUSG00000056735	22.5575	2.13359	0.601256	3.54855	0.000387359	0.0020727	109202	ENSMUSG00000056735	A930024E05Rik	RIKEN cDNA A930024E05 gene	NM_175405
ENSMUSG00000021190	3832.44	2.13032	0.517263	4.11846	3.81418e-05	0.000275272	19141	ENSMUSG00000021190	Lgmn	legumain	NM_011175
ENSMUSG00000063849	379.36	2.1301	0.34127	6.24169	4.32877e-10	9.93293e-09	66812	ENSMUSG00000063849	Ppcdc	phosphopantothenoylcysteine decarboxylase	NM_001357912
ENSMUSG00000058392	74.2931	2.1268	0.341055	6.23595	4.49039e-10	1.02643e-08	72462	ENSMUSG00000058392	Rrp1b	ribosomal RNA processing 1 homolog B (S. cerevisiae)	NM_001163734
ENSMUSG00000039512	47.768	2.11928	0.413335	5.12728	2.93964e-07	3.73669e-06	224648	ENSMUSG00000039512	Uhrf1bp1	UHRF1 (ICBP90) binding protein 1	NM_001080769
ENSMUSG00000001270	749.069	2.11294	0.606462	3.48403	0.000493915	0.00255514	12709	ENSMUSG00000001270	Ckb	creatine kinase, brain	NM_021273
ENSMUSG00000037119	168.294	2.11241	0.302963	6.97249	3.11385e-12	1.03525e-10	210998	ENSMUSG00000037119	Fam91a1	family with sequence similarity 91, member A1	NM_145959
ENSMUSG00000079724	442.098	2.10382	0.371767	5.65897	1.52282e-08	2.50087e-07	#N/A	ENSMUSG00000079724	#N/A	#N/A	#N/A
ENSMUSG00000090035	20.4134	2.10042	0.51049	4.11451	3.87995e-05	0.000279614	14426	ENSMUSG00000090035	Galnt4	polypeptide N-acetylgalactosaminyltransferase 4	NM_015737
ENSMUSG00000045205	70.087	2.09888	0.32048	6.54917	5.78569e-11	1.59117e-09	381510	ENSMUSG00000045205	Dpy19l4	dpy-19-like 4 (C. elegans)	NM_001081201
ENSMUSG00000038872	714.029	2.09872	0.466916	4.49486	6.96158e-06	6.25914e-05	11906	ENSMUSG00000038872	Zfhx3	zinc finger homeobox 3	NM_007496
ENSMUSG00000010660	53.8513	2.097	0.489805	4.28129	1.85813e-05	0.000147556	18799	ENSMUSG00000010660	Plcd1	phospholipase C, delta 1	NM_001293648
ENSMUSG00000028634	168.535	2.09648	0.588823	3.56046	0.000370201	0.00198871	16656	ENSMUSG00000028634	Hivep3	human immunodeficiency virus type I enhancer binding protein 3	NM_010657
ENSMUSG00000053580	371.259	2.08629	0.552171	3.77834	0.000157878	0.00096212	77097	ENSMUSG00000053580	Tanc2	tetratricopeptide repeat, ankyrin repeat and coiled-coil containing 2	NM_175492
ENSMUSG00000055633	58.2039	2.08378	0.480895	4.33314	1.47e-05	0.000120706	68992	ENSMUSG00000055633	Zfp580	zinc finger protein 580	NM_026900
ENSMUSG00000090086	51.0233	2.08266	0.657518	3.16746	0.00153775	0.00671714	#N/A	ENSMUSG00000090086	#N/A	#N/A	#N/A
ENSMUSG00000023764	117.829	2.07359	0.52418	3.95588	7.62534e-05	0.000510209	78887	ENSMUSG00000023764	Sfi1	Sfi1 homolog, spindle assembly associated (yeast)	NM_001363222
ENSMUSG00000030786	830.054	2.07182	0.549749	3.76866	0.000164124	0.000994515	16409	ENSMUSG00000030786	Itgam	integrin alpha M	NM_001082960
ENSMUSG00000034906	46.9858	2.07083	0.412751	5.01715	5.24431e-07	6.34791e-06	215387	ENSMUSG00000034906	Ncaph	non-SMC condensin I complex, subunit H	NM_144818
ENSMUSG00000034168	66.7259	2.05387	0.347577	5.90912	3.43948e-09	6.53022e-08	238330	ENSMUSG00000034168	Irf2bpl	interferon regulatory factor 2 binding protein-like	NM_145836
ENSMUSG00000007039	147.851	2.0536	0.645917	3.17936	0.00147601	0.00649488	51793	ENSMUSG00000007039	Ddah2	dimethylarginine dimethylaminohydrolase 2	NM_001190449
ENSMUSG00000048027	64.6188	2.05259	0.317872	6.45729	1.06592e-10	2.77826e-09	68799	ENSMUSG00000048027	Rgmb	repulsive guidance molecule family member B	NM_001372256
ENSMUSG00000034255	396.257	2.05198	0.63862	3.21314	0.00131291	0.00590218	544817	ENSMUSG00000034255	Arhgap27	Rho GTPase activating protein 27	NM_001205236
ENSMUSG00000029802	26.8177	2.0498	0.397358	5.15856	2.4885e-07	3.19739e-06	26357	ENSMUSG00000029802	Abcg2	ATP binding cassette subfamily G member 2 (Junior blood group)	NM_001355477
ENSMUSG00000039982	205.209	2.04721	0.638829	3.20463	0.00135235	0.00605222	207521	ENSMUSG00000039982	Dtx4	deltex 4, E3 ubiquitin ligase	NM_172442
ENSMUSG00000078552	19.213	2.04504	0.630099	3.24558	0.00117213	0.00535786	100504491	ENSMUSG00000078552	Dcdc2b	doublecortin domain containing 2b	NM_001195730
ENSMUSG00000022270	212.232	2.04116	0.604179	3.3784	0.000729084	0.00357986	66270	ENSMUSG00000022270	Retreg1	reticulophagy regulator 1	NM_001034851
ENSMUSG00000048490	194.753	2.03961	0.337052	6.05134	1.43649e-09	2.93597e-08	268903	ENSMUSG00000048490	Nrip1	nuclear receptor interacting protein 1	NM_001358238
ENSMUSG00000046410	263.683	2.0352	0.315076	6.45938	1.05134e-10	2.74505e-09	52150	ENSMUSG00000046410	Kcnk6	potassium inwardly-rectifying channel, subfamily K, member 6	NM_001033525
ENSMUSG00000026814	383.895	2.02663	0.636783	3.18261	0.00145955	0.00643761	13805	ENSMUSG00000026814	Eng	endoglin	NM_001146348
ENSMUSG00000019055	501.778	2.02159	0.328277	6.15819	7.3579e-10	1.58848e-08	18822	ENSMUSG00000019055	Plod1	procollagen-lysine, 2-oxoglutarate 5-dioxygenase 1	NM_011122
ENSMUSG00000020092	183.712	2.0169	0.496938	4.05865	4.93567e-05	0.000347167	27355	ENSMUSG00000020092	Pald1	phosphatase domain containing, paladin 1	NM_001372378
ENSMUSG00000031012	54.0549	2.0119	0.447102	4.49987	6.79954e-06	6.13188e-05	12361	ENSMUSG00000031012	Cask	calcium/calmodulin-dependent serine protein kinase (MAGUK family)	NM_001284503
ENSMUSG00000044700	38.4972	2.00631	0.461365	4.34864	1.36982e-05	0.000113729	230917	ENSMUSG00000044700	Tmem201	transmembrane protein 201	NM_001025106
ENSMUSG00000021555	126.437	2.00623	0.182166	11.0132	3.30097e-28	6.25137e-26	78689	ENSMUSG00000021555	Naa35	N(alpha)-acetyltransferase 35, NatC auxiliary subunit	NM_030153
ENSMUSG00000022844	22.1364	2.00543	0.656463	3.05491	0.00225129	0.00927867	72599	ENSMUSG00000022844	Pdia5	protein disulfide isomerase associated 5	NM_028295
ENSMUSG00000029204	149.028	2.00367	0.645783	3.1027	0.00191763	0.00808615	74734	ENSMUSG00000029204	Rhoh	ras homolog family member H	NM_001081105
ENSMUSG00000037940	20.4895	2.0036	0.648831	3.08801	0.002015	0.00842314	234515	ENSMUSG00000037940	Inpp4b	inositol polyphosphate-4-phosphatase, type II	NM_001024617
ENSMUSG00000056917	989.358	2.00206	0.222111	9.01377	1.99095e-19	1.81626e-17	20469	ENSMUSG00000056917	Sipa1	signal-induced proliferation associated gene 1	NM_001164480
ENSMUSG00000012640	34.9139	1.99902	0.439805	4.54525	5.48691e-06	5.04924e-05	69930	ENSMUSG00000012640	Zfp715	zinc finger protein 715	NM_001357811
ENSMUSG00000022199	154.005	1.99802	0.466798	4.28027	1.86668e-05	0.000147999	59049	ENSMUSG00000022199	Slc22a17	solute carrier family 22 (organic cation transporter), member 17	NM_001360406
ENSMUSG00000000686	44.0074	1.99787	0.506442	3.94491	7.98284e-05	0.000530805	67477	ENSMUSG00000000686	Abhd15	abhydrolase domain containing 15	NM_026185
ENSMUSG00000005057	177.279	1.99347	0.559436	3.56335	0.000366151	0.00197263	23921	ENSMUSG00000005057	Sh2b2	SH2B adaptor protein 2	NM_001302938
ENSMUSG00000008763	245.695	1.98918	0.282098	7.05138	1.77147e-12	6.12078e-11	17156	ENSMUSG00000008763	Man1a2	mannosidase, alpha, class 1A, member 2	NM_010763
ENSMUSG00000022263	146.92	1.98867	0.291109	6.83135	8.41218e-12	2.67776e-10	223435	ENSMUSG00000022263	Trio	triple functional domain (PTPRF interacting)	NM_001081302
ENSMUSG00000055862	35.1877	1.98545	0.549732	3.61166	0.000304245	0.00168212	71564	ENSMUSG00000055862	Izumo4	IZUMO family member 4	NM_027829
ENSMUSG00000020522	312.779	1.98184	0.260765	7.60009	2.95933e-14	1.36229e-12	216760	ENSMUSG00000020522	Mfap3	microfibrillar-associated protein 3	NM_145426
ENSMUSG00000062078	367.845	1.98143	0.319064	6.21014	5.29361e-10	1.18559e-08	19317	ENSMUSG00000062078	Qk	quaking	NM_001159516
ENSMUSG00000046329	42.6634	1.9748	0.581861	3.39393	0.000688977	0.00341657	66972	ENSMUSG00000046329	Slc25a23	solute carrier family 25 (mitochondrial carrier; phosphate carrier), member 23	NM_025877
ENSMUSG00000032306	93.1527	1.96716	0.425754	4.62041	3.82976e-06	3.68233e-05	110119	ENSMUSG00000032306	Mpi	mannose phosphate isomerase	NM_025837
ENSMUSG00000026121	115.359	1.96381	0.585417	3.35454	0.00079496	0.00384651	20353	ENSMUSG00000026121	Sema4c	sema domain, immunoglobulin domain (Ig), transmembrane domain (TM) and short cytoplasmic domain, (semaphorin) 4C	NM_001126047
ENSMUSG00000018167	570.524	1.96323	0.221308	8.87102	7.24801e-19	6.23204e-17	59045	ENSMUSG00000018167	Stard3	START domain containing 3	NM_021547
ENSMUSG00000039206	264.173	1.96107	0.302459	6.48373	8.94816e-11	2.38209e-09	231871	ENSMUSG00000039206	Daglb	diacylglycerol lipase, beta	NM_144915
ENSMUSG00000027488	263.185	1.95526	0.33655	5.8097	6.25851e-09	1.11336e-07	20648	ENSMUSG00000027488	Snta1	syntrophin, acidic 1	NM_009228
ENSMUSG00000006705	249.892	1.95369	0.246581	7.92311	2.31643e-15	1.25566e-13	18771	ENSMUSG00000006705	Pknox1	Pbx/knotted 1 homeobox	NM_016670
ENSMUSG00000039976	197.314	1.95287	0.602082	3.24353	0.0011806	0.0053916	207592	ENSMUSG00000039976	Tbc1d16	TBC1 domain family, member 16	NM_001347625
ENSMUSG00000037108	37.0158	1.95247	0.50276	3.88351	0.000102959	0.000663953	381678	ENSMUSG00000037108	Zcwpw1	zinc finger, CW type with PWWP domain 1	NM_001005426
ENSMUSG00000039747	55.4117	1.95209	0.446902	4.36806	1.25355e-05	0.000104949	269717	ENSMUSG00000039747	Orai2	ORAI calcium release-activated calcium modulator 2	NM_178751
ENSMUSG00000046417	28.6176	1.94796	0.574223	3.39235	0.000692963	0.00343257	192976	ENSMUSG00000046417	Lrrc75a	leucine rich repeat containing 75A	NM_001357955
ENSMUSG00000037085	28.8551	1.94158	0.401802	4.8322	1.35035e-06	1.47896e-05	68260	ENSMUSG00000037085	Trmt12	tRNA methyltranferase 12	NM_026642
ENSMUSG00000003644	828.554	1.93367	0.273714	7.06456	1.61131e-12	5.59322e-11	20111	ENSMUSG00000003644	Rps6ka1	ribosomal protein S6 kinase polypeptide 1	NM_001285505
ENSMUSG00000045763	2115.72	1.93298	0.575843	3.35678	0.000788562	0.00382297	70350	ENSMUSG00000045763	Basp1	brain abundant, membrane attached signal protein 1	NM_027395
ENSMUSG00000009614	20.287	1.92677	0.630254	3.05713	0.00223471	0.00922557	192166	ENSMUSG00000009614	Sardh	sarcosine dehydrogenase	NM_138665
ENSMUSG00000041849	54.8823	1.92092	0.497312	3.8626	0.000112186	0.000714522	239319	ENSMUSG00000041849	Card6	caspase recruitment domain family, member 6	NM_001163138
ENSMUSG00000038843	150.865	1.91851	0.345496	5.55292	2.80942e-08	4.3783e-07	14537	ENSMUSG00000038843	Gcnt1	glucosaminyl (N-acetyl) transferase 1, core 2	NM_001136484
ENSMUSG00000037824	310.527	1.91674	0.253804	7.55204	4.28489e-14	1.90226e-12	52588	ENSMUSG00000037824	Tspan14	tetraspanin 14	NM_001316748
ENSMUSG00000022876	158.604	1.90994	0.418438	4.56444	5.00835e-06	4.6802e-05	67742	ENSMUSG00000022876	Samsn1	SAM domain, SH3 domain and nuclear localization signals, 1	NM_023380
ENSMUSG00000034663	223.262	1.90646	0.329649	5.78331	7.32465e-09	1.2862e-07	140780	ENSMUSG00000034663	Bmp2k	BMP2 inducible kinase	NM_080708
ENSMUSG00000021624	296.646	1.90267	0.383036	4.96734	6.78781e-07	8.00255e-06	17079	ENSMUSG00000021624	Cd180	CD180 antigen	NM_001360519
ENSMUSG00000039428	86.843	1.90075	0.423842	4.48457	7.30622e-06	6.52977e-05	72759	ENSMUSG00000039428	Tmem135	transmembrane protein 135	NM_001360745
ENSMUSG00000021978	280.382	1.89987	0.423935	4.48151	7.41173e-06	6.60041e-05	54616	ENSMUSG00000021978	Extl3	exostosin-like glycosyltransferase 3	NM_001360385
ENSMUSG00000038271	373.726	1.89957	0.407232	4.6646	3.09215e-06	3.05559e-05	320678	ENSMUSG00000038271	Iffo1	intermediate filament family orphan 1	NM_001039669
ENSMUSG00000071337	131.734	1.89861	0.296655	6.40006	1.55313e-10	3.9317e-09	21841	ENSMUSG00000071337	Tia1	cytotoxic granule-associated RNA binding protein 1	NM_001164078
ENSMUSG00000010307	1069.89	1.89502	0.466379	4.06327	4.83903e-05	0.000341172	67893	ENSMUSG00000010307	Tmem86a	transmembrane protein 86A	NM_026436
ENSMUSG00000074361	44.2975	1.89418	0.53599	3.53398	0.000409346	0.00217325	319430	ENSMUSG00000074361	C5ar2	complement component 5a receptor 2	NM_001146005
ENSMUSG00000022180	280.991	1.89381	0.552892	3.42527	0.000614189	0.00308559	50934	ENSMUSG00000022180	Slc7a8	solute carrier family 7 (cationic amino acid transporter, y+ system), member 8	NM_016972
ENSMUSG00000007880	324.828	1.8927	0.280793	6.74056	1.57782e-11	4.7882e-10	93760	ENSMUSG00000007880	Arid1a	AT rich interactive domain 1A (SWI-like)	NM_001080819
ENSMUSG00000024621	17162.9	1.89234	0.332699	5.68786	1.28638e-08	2.16485e-07	12978	ENSMUSG00000024621	Csf1r	colony stimulating factor 1 receptor	NM_001037859
ENSMUSG00000025223	453.736	1.89124	0.174485	10.839	2.24954e-27	4.15499e-25	16825	ENSMUSG00000025223	Ldb1	LIM domain binding 1	NM_001113408
ENSMUSG00000038740	200.513	1.88772	0.482657	3.91109	9.188e-05	0.000599223	72543	ENSMUSG00000038740	Mvb12b	multivesicular body subunit 12B	NM_175184
ENSMUSG00000048897	422.815	1.88556	0.279584	6.74419	1.53888e-11	4.6795e-10	209225	ENSMUSG00000048897	Zfp710	zinc finger protein 710	NM_001145999
ENSMUSG00000056724	219.589	1.88492	0.465685	4.04764	5.17375e-05	0.000361534	235627	ENSMUSG00000056724	Nbeal2	neurobeachin-like 2	NM_183276
ENSMUSG00000073469	682.775	1.88288	0.310774	6.05869	1.37236e-09	2.8126e-08	#N/A	ENSMUSG00000073469	#N/A	#N/A	#N/A
ENSMUSG00000036606	1014.25	1.88144	0.305446	6.15965	7.29056e-10	1.5785e-08	140570	ENSMUSG00000036606	Plxnb2	plexin B2	NM_001159521
ENSMUSG00000040188	1553.39	1.87293	0.238915	7.8393	4.53056e-15	2.3373e-13	24044	ENSMUSG00000040188	Scamp2	secretory carrier membrane protein 2	NM_022813
ENSMUSG00000007570	78.4194	1.86997	0.319098	5.86018	4.62353e-09	8.53814e-08	72775	ENSMUSG00000007570	Fance	Fanconi anemia, complementation group E	NM_001163819
ENSMUSG00000006526	68.3555	1.858	0.26122	7.11278	1.13732e-12	4.01306e-11	69179	ENSMUSG00000006526	Stimate	STIM activating enhancer	NM_028839
ENSMUSG00000021876	2103.25	1.84687	0.60446	3.0554	0.00224761	0.0092737	58809	ENSMUSG00000021876	Rnase4	ribonuclease, RNase A family 4	NM_021472
ENSMUSG00000044066	75.3103	1.8384	0.367929	4.99662	5.8343e-07	6.9718e-06	216543	ENSMUSG00000044066	Cep68	centrosomal protein 68	NM_172260
ENSMUSG00000073468	203.679	1.83748	0.220696	8.32583	8.3741e-17	5.61816e-15	106489	ENSMUSG00000073468	Sft2d1	SFT2 domain containing 1	NM_001357890
ENSMUSG00000032066	71.6285	1.83059	0.462548	3.95762	7.56997e-05	0.000506957	170752	ENSMUSG00000032066	Bco2	beta-carotene oxygenase 2	NM_001359610
ENSMUSG00000020696	31.2997	1.82769	0.548713	3.33087	0.000865752	0.00415012	67338	ENSMUSG00000020696	Rffl	ring finger and FYVE like domain containing protein	NM_001007465
ENSMUSG00000029385	91.9279	1.8171	0.293754	6.18579	6.17922e-10	1.35553e-08	12452	ENSMUSG00000029385	Ccng2	cyclin G2	NM_007635
ENSMUSG00000026339	106.499	1.8117	0.420073	4.31282	1.61185e-05	0.00013021	70829	ENSMUSG00000026339	Ccdc93	coiled-coil domain containing 93	NM_001025156
ENSMUSG00000068394	54.8865	1.81014	0.409937	4.41566	1.00705e-05	8.64891e-05	99100	ENSMUSG00000068394	Cep152	centrosomal protein 152	NM_001081091
ENSMUSG00000024818	369.802	1.80808	0.239372	7.55342	4.23973e-14	1.90226e-12	107375	ENSMUSG00000024818	Slc25a45	solute carrier family 25, member 45	NM_001361973
ENSMUSG00000022540	530.437	1.80797	0.545491	3.31439	0.000918419	0.00436482	66049	ENSMUSG00000022540	Rogdi	rogdi homolog	NM_133185
ENSMUSG00000002486	80.1986	1.80245	0.402193	4.48156	7.41006e-06	6.60041e-05	77832	ENSMUSG00000002486	Tchp	trichoplein, keratin filament binding	NM_029992
ENSMUSG00000055652	68.0999	1.78765	0.424172	4.21445	2.50386e-05	0.00019054	207952	ENSMUSG00000055652	Klhl25	kelch-like 25	NM_001122780
ENSMUSG00000037007	24.2368	1.77891	0.347145	5.1244	2.98484e-07	3.78763e-06	56314	ENSMUSG00000037007	Zfp113	zinc finger protein 113	NM_019747
ENSMUSG00000075028	38.9555	1.77781	0.376325	4.72415	2.31083e-06	2.36641e-05	100042784	ENSMUSG00000075028	Prdm11	PR domain containing 11	NM_001177536
ENSMUSG00000010142	160.322	1.7696	0.408359	4.33343	1.46801e-05	0.000120609	57916	ENSMUSG00000010142	Tnfrsf13b	tumor necrosis factor receptor superfamily, member 13b	NM_021349
ENSMUSG00000030691	139.466	1.76954	0.494904	3.57553	0.000349526	0.00189329	207278	ENSMUSG00000030691	Fchsd2	FCH and double SH3 domains 2	NM_001146010
ENSMUSG00000062127	421.252	1.76603	0.326727	5.40523	6.47241e-08	9.27526e-07	80281	ENSMUSG00000062127	Cttnbp2nl	CTTNBP2 N-terminal like	NM_001163332
ENSMUSG00000046791	35.042	1.76065	0.408453	4.31054	1.62855e-05	0.000131225	71952	ENSMUSG00000046791	Riox1	ribosomal oxygenase 1	NM_023633
ENSMUSG00000026288	930.791	1.75973	0.192152	9.15801	5.28646e-20	5.10263e-18	16331	ENSMUSG00000026288	Inpp5d	inositol polyphosphate-5-phosphatase D	NM_001110192
ENSMUSG00000038910	299.931	1.75572	0.308009	5.70023	1.19646e-08	2.01806e-07	224860	ENSMUSG00000038910	Plcl2	phospholipase C-like 2	NM_013880
ENSMUSG00000025241	64.3017	1.75547	0.322329	5.44621	5.14551e-08	7.54725e-07	17281	ENSMUSG00000025241	Fyco1	FYVE and coiled-coil domain containing 1	NM_001110253
ENSMUSG00000059013	103.986	1.75355	0.561571	3.12257	0.00179278	0.00764805	27387	ENSMUSG00000059013	Sh2d3c	SH2 domain containing 3C	NM_001252547
ENSMUSG00000048371	24.3215	1.7449	0.452429	3.85675	0.000114905	0.000729665	382051	ENSMUSG00000048371	Pdp2	pyruvate dehyrogenase phosphatase catalytic subunit 2	NM_001024606
ENSMUSG00000026986	35.9689	1.74378	0.546172	3.19272	0.00140937	0.00624944	140483	ENSMUSG00000026986	Hnmt	histamine N-methyltransferase	NM_080462
ENSMUSG00000030287	400.476	1.74239	0.316001	5.51388	3.51007e-08	5.34768e-07	16439	ENSMUSG00000030287	Itpr2	inositol 1,4,5-triphosphate receptor 2	NM_010586
ENSMUSG00000047379	74.6922	1.74135	0.29971	5.81012	6.24297e-09	1.11192e-07	108902	ENSMUSG00000047379	B4gat1	beta-1,4-glucuronyltransferase 1	NM_175383
ENSMUSG00000030811	24.6925	1.73811	0.526327	3.30233	0.000958856	0.00453279	233902	ENSMUSG00000030811	Fbxl19	F-box and leucine-rich repeat protein 19	NM_172748
ENSMUSG00000026110	278.121	1.73793	0.442147	3.93067	8.47087e-05	0.000560764	269181	ENSMUSG00000026110	Mgat4a	mannoside acetylglucosaminyltransferase 4, isoenzyme A	NM_001290801
ENSMUSG00000026858	25.1025	1.72938	0.373244	4.63338	3.59737e-06	3.49029e-05	108958	ENSMUSG00000026858	Miga2	mitoguardin 2	NM_001242407
ENSMUSG00000069631	137.126	1.72526	0.20842	8.27783	1.25444e-16	8.29635e-15	72149	ENSMUSG00000069631	Strada	STE20-related kinase adaptor alpha	NM_001252448
ENSMUSG00000057193	173.078	1.72358	0.554618	3.10769	0.00188557	0.00798247	68682	ENSMUSG00000057193	Slc44a2	solute carrier family 44, member 2	NM_001199186
ENSMUSG00000024544	104.781	1.71731	0.442753	3.8787	0.000105017	0.000676059	52662	ENSMUSG00000024544	Ldlrad4	low density lipoprotein receptor class A domain containing 4	NM_001357444
ENSMUSG00000022255	1286.96	1.71254	0.315049	5.4358	5.45513e-08	7.98573e-07	67154	ENSMUSG00000022255	Mtdh	metadherin	NM_001357925
ENSMUSG00000079442	171.874	1.71219	0.409463	4.18155	2.89525e-05	0.000216603	20448	ENSMUSG00000079442	St6galnac4	ST6 (alpha-N-acetyl-neuraminyl-2,3-beta-galactosyl-1,3)-N-acetylgalactosaminide alpha-2,6-sialyltransferase 4	NM_001276425
ENSMUSG00000039763	22.4366	1.71001	0.53358	3.20478	0.00135164	0.00605085	246738	ENSMUSG00000039763	Dnajc28	DnaJ heat shock protein family (Hsp40) member C28	NM_001099738
ENSMUSG00000024013	1608.75	1.70797	0.493832	3.4586	0.000542992	0.00276947	26382	ENSMUSG00000024013	Fgd2	FYVE, RhoGEF and PH domain containing 2	NM_001159538
ENSMUSG00000001436	36.2363	1.70584	0.399473	4.27024	1.95264e-05	0.000153917	20509	ENSMUSG00000001436	Slc19a1	solute carrier family 19 (folate transporter), member 1	NM_001199271
ENSMUSG00000044328	117.556	1.70402	0.257448	6.61889	3.61915e-11	1.03927e-09	216964	ENSMUSG00000044328	Trp53i13	transformation related protein 53 inducible protein 13	NM_001024920
ENSMUSG00000050890	25.9232	1.69872	0.472194	3.59751	0.000321273	0.00176134	230809	ENSMUSG00000050890	Pdik1l	PDLIM1 interacting kinase 1 like	NM_001163794
ENSMUSG00000024403	25.3467	1.69824	0.433387	3.91853	8.90915e-05	0.000583836	66237	ENSMUSG00000024403	Atp6v1g2	ATPase, H+ transporting, lysosomal V1 subunit G2	NM_001347351
ENSMUSG00000002897	442.219	1.69602	0.322863	5.25305	1.49601e-07	1.98773e-06	16172	ENSMUSG00000002897	Il17ra	interleukin 17 receptor A	NM_008359
ENSMUSG00000004661	155.981	1.69361	0.385953	4.38813	1.14329e-05	9.68009e-05	56380	ENSMUSG00000004661	Arid3b	AT rich interactive domain 3B (BRIGHT-like)	NM_019689
ENSMUSG00000059540	27.3228	1.69325	0.446856	3.78926	0.000151099	0.000927235	21400	ENSMUSG00000059540	Tcea2	transcription elongation factor A (SII), 2	NM_001356342
ENSMUSG00000021477	1144.88	1.69301	0.427693	3.95848	7.54286e-05	0.000505821	13039	ENSMUSG00000021477	Ctsl	cathepsin L	NM_009984
ENSMUSG00000031508	133	1.6871	0.312948	5.39099	7.00716e-08	9.94631e-07	102334	ENSMUSG00000031508	Ankrd10	ankyrin repeat domain 10	NM_001167967
ENSMUSG00000048755	47.5258	1.68657	0.395677	4.26249	2.02166e-05	0.000159013	223722	ENSMUSG00000048755	Mcat	malonyl CoA:ACP acyltransferase (mitochondrial)	NM_001030014
ENSMUSG00000041530	97.4724	1.68578	0.309139	5.45316	4.94833e-08	7.28661e-07	236511	ENSMUSG00000041530	Ago1	argonaute RISC catalytic subunit 1	NM_001317173
ENSMUSG00000031214	168.511	1.68385	0.548203	3.07159	0.00212925	0.00883303	94190	ENSMUSG00000031214	Ophn1	oligophrenin 1	NM_001313754
ENSMUSG00000045374	304.362	1.68187	0.21827	7.70544	1.30398e-14	6.29318e-13	192652	ENSMUSG00000045374	Wdr81	WD repeat domain 81	NM_138950
ENSMUSG00000035954	41.1302	1.68045	0.475208	3.53625	0.000405855	0.00215855	238130	ENSMUSG00000035954	Dock4	dedicator of cytokinesis 4	NM_172803
ENSMUSG00000042787	52.7979	1.68032	0.341698	4.91756	8.76281e-07	1.01158e-05	208194	ENSMUSG00000042787	Exog	endo/exonuclease (5'-3'), endonuclease G-like	NM_001172136
ENSMUSG00000024663	686.064	1.67861	0.510426	3.28866	0.00100667	0.00471378	74760	ENSMUSG00000024663	Rab3il1	RAB3A interacting protein (rabin3)-like 1	NM_001347429
ENSMUSG00000019960	303.824	1.67816	0.479859	3.4972	0.000470172	0.00245609	67603	ENSMUSG00000019960	Dusp6	dual specificity phosphatase 6	NM_026268
ENSMUSG00000035151	39.1271	1.67635	0.364684	4.59673	4.29182e-06	4.0846e-05	244548	ENSMUSG00000035151	Elmod2	ELMO/CED-12 domain containing 2	NM_001170691
ENSMUSG00000025231	41.2609	1.67433	0.319444	5.24139	1.59369e-07	2.10443e-06	24069	ENSMUSG00000025231	Sufu	SUFU negative regulator of hedgehog signaling	NM_001025391
ENSMUSG00000041762	145.178	1.67383	0.48973	3.41786	0.00063116	0.00316129	68526	ENSMUSG00000041762	Gpr155	G protein-coupled receptor 155	NM_001080707
ENSMUSG00000001751	254.559	1.67278	0.364416	4.5903	4.42608e-06	4.1937e-05	27419	ENSMUSG00000001751	Naglu	alpha-N-acetylglucosaminidase (Sanfilippo disease IIIB)	NM_013792
ENSMUSG00000021756	144.37	1.67225	0.335352	4.98655	6.14657e-07	7.29832e-06	16195	ENSMUSG00000021756	Il6st	interleukin 6 signal transducer	NM_010560
ENSMUSG00000037752	27.4689	1.6715	0.410752	4.06937	4.7141e-05	0.000333149	381560	ENSMUSG00000037752	Xkr8	X-linked Kx blood group related 8	NM_201368
ENSMUSG00000038648	105.491	1.67131	0.469336	3.56102	0.000369414	0.0019859	208647	ENSMUSG00000038648	Creb3l2	cAMP responsive element binding protein 3-like 2	NM_178661
ENSMUSG00000020100	681.112	1.67059	0.453834	3.68106	0.000232268	0.00133755	71279	ENSMUSG00000020100	Slc29a3	solute carrier family 29 (nucleoside transporters), member 3	NM_023596
ENSMUSG00000074916	53.0319	1.66885	0.429137	3.88886	0.000100718	0.000651185	72136	ENSMUSG00000074916	Chst14	carbohydrate sulfotransferase 14	NM_028117
ENSMUSG00000034248	113.572	1.66449	0.365047	4.55965	5.12393e-06	4.76736e-05	67712	ENSMUSG00000034248	Slc25a37	solute carrier family 25, member 37	NM_026331
ENSMUSG00000027428	40.1139	1.65731	0.369359	4.48698	7.22409e-06	6.47903e-05	26450	ENSMUSG00000027428	Rbbp9	retinoblastoma binding protein 9, serine hydrolase	NM_015754
ENSMUSG00000041225	70.7675	1.65363	0.441611	3.74454	0.000180723	0.0010785	75415	ENSMUSG00000041225	Arhgap12	Rho GTPase activating protein 12	NM_001039692
ENSMUSG00000024052	321.117	1.65353	0.370423	4.46388	8.04888e-06	7.09374e-05	64898	ENSMUSG00000024052	Lpin2	lipin 2	NM_001164885
ENSMUSG00000074405	30.8599	1.65135	0.393806	4.19332	2.74898e-05	0.000206256	319748	ENSMUSG00000074405	Zfp865	zinc finger protein 865	NM_001033383
ENSMUSG00000045980	281.883	1.6502	0.390078	4.23044	2.3324e-05	0.000179871	320534	ENSMUSG00000045980	Tmem104	transmembrane protein 104	NM_001033393
ENSMUSG00000018008	1633.44	1.64686	0.504194	3.26632	0.00108954	0.00502177	72318	ENSMUSG00000018008	Cyth4	cytohesin 4	NM_028195
ENSMUSG00000030276	97.2661	1.64482	0.442205	3.71959	0.000199542	0.00117257	101100	ENSMUSG00000030276	Ttll3	tubulin tyrosine ligase-like family, member 3	NM_001142732
ENSMUSG00000048120	860.935	1.64166	0.377953	4.34355	1.40199e-05	0.000116013	12495	ENSMUSG00000048120	Entpd1	ectonucleoside triphosphate diphosphohydrolase 1	NM_001304721
ENSMUSG00000055912	53.4637	1.63823	0.454458	3.60481	0.00031238	0.00171947	232086	ENSMUSG00000055912	Tmem150a	transmembrane protein 150A	NM_144916
ENSMUSG00000049957	60.9582	1.63819	0.469117	3.49208	0.000479276	0.00249668	67291	ENSMUSG00000049957	Ccdc137	coiled-coil domain containing 137	NM_152807
ENSMUSG00000026458	946.219	1.63797	0.508449	3.2215	0.00127519	0.00575858	68507	ENSMUSG00000026458	Ppfia4	protein tyrosine phosphatase, receptor type, f polypeptide (PTPRF), interacting protein (liprin), alpha 4	NM_001144855
ENSMUSG00000031767	29.4421	1.63494	0.40427	4.04418	5.25071e-05	0.000365717	67528	ENSMUSG00000031767	Nudt7	nudix (nucleoside diphosphate linked moiety X)-type motif 7	NM_001290180
ENSMUSG00000029344	457.538	1.63483	0.33496	4.88068	1.05719e-06	1.18833e-05	22022	ENSMUSG00000029344	Tpst2	protein-tyrosine sulfotransferase 2	NM_001326590
ENSMUSG00000027459	236.536	1.63328	0.514371	3.17529	0.00149686	0.00657091	73847	ENSMUSG00000027459	Fam110a	family with sequence similarity 110, member A	NM_001289150
ENSMUSG00000048578	272.294	1.63234	0.220093	7.41661	1.20154e-13	4.925e-12	109154	ENSMUSG00000048578	Mlec	malectin	NM_175403
ENSMUSG00000038279	129.922	1.63117	0.35307	4.61995	3.83833e-06	3.6882e-05	110109	ENSMUSG00000038279	Nop2	NOP2 nucleolar protein	NM_138747
ENSMUSG00000033713	53.5777	1.63067	0.421519	3.86854	0.000109488	0.00070032	71375	ENSMUSG00000033713	Foxn3	forkhead box N3	NM_183186
ENSMUSG00000026791	147.802	1.6297	0.264601	6.15908	7.31679e-10	1.58189e-08	56017	ENSMUSG00000026791	Slc2a8	solute carrier family 2, (facilitated glucose transporter), member 8	NM_001356409
ENSMUSG00000047635	62.3695	1.62957	0.391056	4.16711	3.0848e-05	0.000229155	72650	ENSMUSG00000047635	2810006K23Rik	RIKEN cDNA 2810006K23 gene	NM_001134717
ENSMUSG00000023191	48.4459	1.62948	0.401653	4.05695	4.97186e-05	0.000349221	14789	ENSMUSG00000023191	P3h3	prolyl 3-hydroxylase 3	NM_013534
ENSMUSG00000030557	371.633	1.62756	0.351474	4.63065	3.64516e-06	3.52979e-05	17258	ENSMUSG00000030557	Mef2a	myocyte enhancer factor 2A	NM_001033713
ENSMUSG00000045854	35.4679	1.62564	0.523627	3.10457	0.00190554	0.00805561	108755	ENSMUSG00000045854	Lyrm2	LYR motif containing 2	NM_175364
ENSMUSG00000025495	82.4886	1.62501	0.237995	6.82793	8.61492e-12	2.73647e-10	27388	ENSMUSG00000025495	Ptdss2	phosphatidylserine synthase 2	NM_013782
ENSMUSG00000026189	58.7799	1.62223	0.427279	3.79667	0.000146656	0.000901814	111175	ENSMUSG00000026189	Pecr	peroxisomal trans-2-enoyl-CoA reductase	NM_001356516
ENSMUSG00000051510	350.67	1.62065	0.291565	5.55845	2.72183e-08	4.26402e-07	17134	ENSMUSG00000051510	Mafg	v-maf musculoaponeurotic fibrosarcoma oncogene family, protein G (avian)	NM_010756
ENSMUSG00000035064	89.524	1.61984	0.345183	4.6927	2.69628e-06	2.69286e-05	13631	ENSMUSG00000035064	Eef2k	eukaryotic elongation factor-2 kinase	NM_001267710
ENSMUSG00000031389	311.47	1.61558	0.435602	3.70885	0.000208204	0.0012144	171207	ENSMUSG00000031389	Arhgap4	Rho GTPase activating protein 4	NM_001162423
ENSMUSG00000036898	37.7624	1.61376	0.410419	3.93198	8.42505e-05	0.000558225	72154	ENSMUSG00000036898	Zfp157	zinc finger protein 157	NM_028130
ENSMUSG00000033703	35.0887	1.60762	0.49634	3.23895	0.00119972	0.00546727	234730	ENSMUSG00000033703	Fcsk	fucose kinase	NM_172283
ENSMUSG00000051469	54.6507	1.60688	0.298177	5.38901	7.08459e-08	1.00467e-06	59057	ENSMUSG00000051469	Zfp24	zinc finger protein 24	NM_001357447
ENSMUSG00000028649	598.115	1.6058	0.269501	5.95843	2.5467e-09	4.94179e-08	11426	ENSMUSG00000028649	Macf1	microtubule-actin crosslinking factor 1	NM_001199136
ENSMUSG00000022489	219.925	1.60434	0.370292	4.33263	1.4734e-05	0.000120919	18574	ENSMUSG00000022489	Pde1b	phosphodiesterase 1B, Ca2+-calmodulin dependent	NM_001285890
ENSMUSG00000024986	158.896	1.6016	0.366793	4.3665	1.26253e-05	0.000105609	15242	ENSMUSG00000024986	Hhex	hematopoietically expressed homeobox	NM_008245
ENSMUSG00000019916	262.698	1.60096	0.286764	5.58285	2.36612e-08	3.75393e-07	18451	ENSMUSG00000019916	P4ha1	procollagen-proline, 2-oxoglutarate 4-dioxygenase (proline 4-hydroxylase), alpha 1 polypeptide	NM_001316370
ENSMUSG00000006154	82.8625	1.60022	0.379322	4.21862	2.45797e-05	0.00018743	67425	ENSMUSG00000006154	Eps8l1	EPS8-like 1	NM_001290416
ENSMUSG00000002279	199.95	1.59963	0.324308	4.93243	8.12128e-07	9.44075e-06	76483	ENSMUSG00000002279	Lmf1	lipase maturation factor 1	NM_029624
ENSMUSG00000054693	122.161	1.59951	0.445574	3.58977	0.000330968	0.0018065	11487	ENSMUSG00000054693	Adam10	a disintegrin and metallopeptidase domain 10	NM_007399
ENSMUSG00000046574	123.979	1.59766	0.36956	4.32314	1.53822e-05	0.000125277	233210	ENSMUSG00000046574	Prr12	proline rich 12	NM_175022
ENSMUSG00000023026	304.627	1.59752	0.344446	4.63794	3.51895e-06	3.42531e-05	239667	ENSMUSG00000023026	Dip2b	disco interacting protein 2 homolog B	NM_001159361
ENSMUSG00000057778	23.9422	1.59421	0.321621	4.9568	7.16641e-07	8.42237e-06	192986	ENSMUSG00000057778	Cyb5d2	cytochrome b5 domain containing 2	NM_001024926
ENSMUSG00000002625	407.528	1.5922	0.336693	4.72893	2.25706e-06	2.31922e-05	54194	ENSMUSG00000002625	Akap8l	A kinase (PRKA) anchor protein 8-like	NM_017476
ENSMUSG00000020709	1934.88	1.58945	0.393884	4.03532	5.45278e-05	0.000378733	216991	ENSMUSG00000020709	Adap2	ArfGAP with dual PH domains 2	NM_172133
ENSMUSG00000022750	64.7253	1.58581	0.516449	3.0706	0.00213632	0.00884575	224023	ENSMUSG00000022750	Klhl22	kelch-like 22	NM_001359068
ENSMUSG00000020261	134.375	1.58457	0.413304	3.83391	0.000126122	0.000793155	215335	ENSMUSG00000020261	Slc36a1	solute carrier family 36 (proton/amino acid symporter), member 1	NM_153139
ENSMUSG00000020528	145.836	1.58348	0.490199	3.23029	0.00123665	0.00560654	212627	ENSMUSG00000020528	Prpsap2	phosphoribosyl pyrophosphate synthetase-associated protein 2	NM_001164242
ENSMUSG00000047875	32.9505	1.57793	0.495078	3.18723	0.00143641	0.00635616	269604	ENSMUSG00000047875	Gpr157	G protein-coupled receptor 157	NM_177366
ENSMUSG00000020707	49.8444	1.57729	0.410707	3.84041	0.000122828	0.000775044	71956	ENSMUSG00000020707	Rnf135	ring finger protein 135	NM_028019
ENSMUSG00000031805	88.3606	1.57524	0.354738	4.44058	8.97168e-06	7.81743e-05	16453	ENSMUSG00000031805	Jak3	Janus kinase 3	NM_001190830
ENSMUSG00000021929	72.5166	1.57371	0.338431	4.65	3.31932e-06	3.25855e-05	16648	ENSMUSG00000021929	Kpna3	karyopherin (importin) alpha 3	NM_008466
ENSMUSG00000002803	47.9222	1.56799	0.41974	3.73563	0.000187245	0.00111121	399566	ENSMUSG00000002803	Btbd6	BTB (POZ) domain containing 6	NM_001145900
ENSMUSG00000021423	4514.66	1.55946	0.48047	3.24569	0.00117166	0.00535734	17084	ENSMUSG00000021423	Ly86	lymphocyte antigen 86	NM_010745
ENSMUSG00000059791	144.135	1.55377	0.37158	4.18153	2.89557e-05	0.000216603	106582	ENSMUSG00000059791	Nrm	nurim (nuclear envelope membrane protein)	NM_134122
ENSMUSG00000002741	310.193	1.5509	0.217151	7.14205	9.19495e-13	3.31483e-11	56418	ENSMUSG00000002741	Ykt6	YKT6 v-SNARE homolog (S. cerevisiae)	NM_019661
ENSMUSG00000018076	134.077	1.55044	0.265597	5.83759	5.29627e-09	9.6162e-08	76199	ENSMUSG00000018076	Med13l	mediator complex subunit 13-like	NM_001347445
ENSMUSG00000026836	53.486	1.54967	0.351764	4.40543	1.05573e-05	9.03074e-05	11477	ENSMUSG00000026836	Acvr1	activin A receptor, type 1	NM_001110204
ENSMUSG00000047810	547.78	1.54568	0.290068	5.32869	9.89249e-08	1.35285e-06	78317	ENSMUSG00000047810	Ccdc88b	coiled-coil domain containing 88B	NM_001081291
ENSMUSG00000034792	763.387	1.54369	0.425549	3.62752	0.000286155	0.00159388	14676	ENSMUSG00000034792	Gna15	guanine nucleotide binding protein, alpha 15	NM_010304
ENSMUSG00000020009	666.831	1.54235	0.42104	3.66318	0.000249101	0.00141757	15979	ENSMUSG00000020009	Ifngr1	interferon gamma receptor 1	NM_010511
ENSMUSG00000042613	903.815	1.54012	0.460121	3.3472	0.000816335	0.00394228	229534	ENSMUSG00000042613	Pbxip1	pre B cell leukemia transcription factor interacting protein 1	NM_146131
ENSMUSG00000036504	55.7873	1.53938	0.392426	3.92273	8.75499e-05	0.000577019	75454	ENSMUSG00000036504	Phpt1	phosphohistidine phosphatase 1	NM_029293
ENSMUSG00000030844	2421.32	1.53856	0.371806	4.13807	3.50235e-05	0.000255479	67865	ENSMUSG00000030844	Rgs10	regulator of G-protein signalling 10	NM_026418
ENSMUSG00000026131	464.087	1.53646	0.462384	3.32291	0.000890852	0.00425272	13518	ENSMUSG00000026131	Dst	dystonin	NM_001276764
ENSMUSG00000048497	62.2869	1.53492	0.327853	4.68172	2.84483e-06	2.82988e-05	216829	ENSMUSG00000048497	Mmgt2	membrane magnesium transporter 2	NM_175002
ENSMUSG00000004187	26.8315	1.53128	0.478557	3.19979	0.00137526	0.00612906	16581	ENSMUSG00000004187	Kifc2	kinesin family member C2	NM_001358909
ENSMUSG00000037525	48.8341	1.53078	0.380671	4.02127	5.78856e-05	0.000399828	75284	ENSMUSG00000037525	Bcdin3d	BCDIN3 domain containing	NM_029236
ENSMUSG00000033386	118.446	1.52937	0.416725	3.66998	0.00024257	0.0013878	20321	ENSMUSG00000033386	Frrs1	ferric-chelate reductase 1	NM_001113478
ENSMUSG00000030447	774.374	1.5266	0.202705	7.53115	5.02967e-14	2.20026e-12	20430	ENSMUSG00000030447	Cyfip1	cytoplasmic FMR1 interacting protein 1	NM_001164661
ENSMUSG00000029674	91.1865	1.52316	0.362651	4.20007	2.66834e-05	0.000201564	16885	ENSMUSG00000029674	Limk1	LIM-domain containing, protein kinase	NM_001305875
ENSMUSG00000039754	44.2658	1.51339	0.38188	3.963	7.4013e-05	0.000497443	72041	ENSMUSG00000039754	Alkbh4	alkB homolog 4, lysine demethylase	NM_001347492
ENSMUSG00000034121	29.1665	1.51328	0.385299	3.92755	8.58159e-05	0.00056709	380718	ENSMUSG00000034121	Mks1	Meckel syndrome, type 1	NM_001039684
ENSMUSG00000028565	34.8612	1.51269	0.470893	3.21239	0.00131636	0.00591059	18027	ENSMUSG00000028565	Nfia	nuclear factor I/A	NM_001122952
ENSMUSG00000031101	218.703	1.51223	0.485759	3.11313	0.00185115	0.00786466	74131	ENSMUSG00000031101	Sash3	SAM and SH3 domain containing 3	NM_001313749
ENSMUSG00000035953	533.635	1.50667	0.235675	6.39299	1.62671e-10	4.08342e-09	219024	ENSMUSG00000035953	Pip4p1	phosphatidylinositol-4,5-bisphosphate 4-phosphatase 1	NM_001033271
ENSMUSG00000056608	93.5381	1.50561	0.479698	3.13867	0.00169715	0.00731943	109151	ENSMUSG00000056608	Chd9	chromodomain helicase DNA binding protein 9	NM_001310530
ENSMUSG00000027947	806.981	1.50272	0.348357	4.31374	1.60512e-05	0.000129807	16194	ENSMUSG00000027947	Il6ra	interleukin 6 receptor, alpha	NM_001310676
ENSMUSG00000000148	73.8348	1.50225	0.355611	4.22442	2.39553e-05	0.000183981	231841	ENSMUSG00000000148	Brat1	BRCA1-associated ATM activator 1	NM_001276287
ENSMUSG00000024442	45.021	1.5005	0.324092	4.62987	3.65899e-06	3.54089e-05	66839	ENSMUSG00000024442	Dele1	DAP3 binding cell death enhancer 1	NM_024179
ENSMUSG00000040618	126.349	1.50041	0.419585	3.57593	0.000348981	0.00189102	74551	ENSMUSG00000040618	Pck2	phosphoenolpyruvate carboxykinase 2 (mitochondrial)	NM_028994
ENSMUSG00000018654	183.339	1.49684	0.293598	5.09829	3.42743e-07	4.28386e-06	22778	ENSMUSG00000018654	Ikzf1	IKAROS family zinc finger 1	NM_001025597
ENSMUSG00000066640	63.8119	1.49519	0.352965	4.23608	2.27453e-05	0.000176135	231863	ENSMUSG00000066640	Fbxl18	F-box and leucine-rich repeat protein 18	NM_001033312
ENSMUSG00000028032	159.032	1.49231	0.264727	5.63718	1.72853e-08	2.81093e-07	23971	ENSMUSG00000028032	Papss1	3'-phosphoadenosine 5'-phosphosulfate synthase 1	NM_001289477
ENSMUSG00000049686	680.283	1.4922	0.240329	6.209	5.33226e-10	1.19247e-08	109305	ENSMUSG00000049686	Orai1	ORAI calcium release-activated calcium modulator 1	NM_175423
ENSMUSG00000025986	25.2767	1.49043	0.463499	3.21561	0.00130168	0.00585699	227059	ENSMUSG00000025986	Slc39a10	solute carrier family 39 (zinc transporter), member 10	NM_001356416
ENSMUSG00000020700	268.781	1.48961	0.336806	4.42276	9.74462e-06	8.40769e-05	26406	ENSMUSG00000020700	Map3k3	mitogen-activated protein kinase kinase kinase 3	NM_011947
ENSMUSG00000029394	174.495	1.48883	0.444488	3.34953	0.000809474	0.00391294	13445	ENSMUSG00000029394	Cdk2ap1	CDK2 (cyclin-dependent kinase 2)-associated protein 1	NM_013812
ENSMUSG00000028015	121.571	1.48581	0.413603	3.59235	0.000327704	0.00179326	229445	ENSMUSG00000028015	Ctso	cathepsin O	NM_177662
ENSMUSG00000024776	27.4897	1.48458	0.442061	3.35832	0.000784186	0.00380545	76630	ENSMUSG00000024776	Stambpl1	STAM binding protein like 1	NM_001360716
ENSMUSG00000031907	204.154	1.48394	0.441381	3.36205	0.000773656	0.0037629	22751	ENSMUSG00000031907	Zfp90	zinc finger protein 90	NM_001368328
ENSMUSG00000001065	91.5604	1.48265	0.359841	4.1203	3.78379e-05	0.000273474	57247	ENSMUSG00000001065	Zfp276	zinc finger protein (C2H2 type) 276	NM_020497
ENSMUSG00000029428	141.701	1.48051	0.258773	5.72126	1.05734e-08	1.79965e-07	13852	ENSMUSG00000029428	Stx2	syntaxin 2	NM_001286033
ENSMUSG00000063362	25.5508	1.47715	0.393365	3.75518	0.000173219	0.00104161	207958	ENSMUSG00000063362	Alg11	asparagine-linked glycosylation 11 (alpha-1,2-mannosyltransferase)	NM_001243161
ENSMUSG00000027427	51.3298	1.47508	0.394084	3.74307	0.000181787	0.00108355	70408	ENSMUSG00000027427	Polr3f	polymerase (RNA) III (DNA directed) polypeptide F	NM_029763
ENSMUSG00000040025	82.3837	1.47413	0.308051	4.78535	1.70686e-06	1.81624e-05	213541	ENSMUSG00000040025	Ythdf2	YTH N6-methyladenosine RNA binding protein 2	NM_145393
ENSMUSG00000062115	98.9137	1.4737	0.312811	4.71117	2.46303e-06	2.49489e-05	19377	ENSMUSG00000062115	Rai1	retinoic acid induced 1	NM_001037764
ENSMUSG00000037926	618.393	1.47327	0.32595	4.51994	6.18583e-06	5.62591e-05	237860	ENSMUSG00000037926	Ssh2	slingshot protein phosphatase 2	NM_001291190
ENSMUSG00000056121	241.717	1.47143	0.3937	3.73746	0.000185892	0.00110406	225020	ENSMUSG00000056121	Fez2	fasciculation and elongation protein zeta 2 (zygin II)	NM_001285940
ENSMUSG00000005374	47.3585	1.46978	0.333779	4.40344	1.06549e-05	9.09358e-05	27368	ENSMUSG00000005374	Tbl2	transducin (beta)-like 2	NM_001363307
ENSMUSG00000020770	118.675	1.46904	0.305984	4.80105	1.5784e-06	1.69888e-05	217331	ENSMUSG00000020770	Unk	unkempt family zinc finger	NM_001286006
ENSMUSG00000004127	36.2256	1.46884	0.452333	3.24726	0.00116522	0.00533277	108943	ENSMUSG00000004127	Trmt10a	tRNA methyltransferase 10A	NM_001348196
ENSMUSG00000046058	55.5818	1.46423	0.431573	3.39278	0.000691861	0.00342905	386655	ENSMUSG00000046058	Eid2	EP300 interacting inhibitor of differentiation 2	NM_198425
ENSMUSG00000059475	48.2741	1.46164	0.372275	3.92623	8.62883e-05	0.000569709	235028	ENSMUSG00000059475	Zfp426	zinc finger protein 426	NM_001110309
ENSMUSG00000020573	229.477	1.46054	0.210345	6.94353	3.82408e-12	1.25741e-10	30955	ENSMUSG00000020573	Pik3cg	phosphatidylinositol-4,5-bisphosphate 3-kinase catalytic subunit gamma	NM_001146200
ENSMUSG00000038312	352.858	1.45736	0.269812	5.40142	6.61168e-08	9.42968e-07	108687	ENSMUSG00000038312	Edem2	ER degradation enhancer, mannosidase alpha-like 2	NM_145537
ENSMUSG00000029714	253.54	1.45368	0.359176	4.04725	5.18221e-05	0.000361788	57330	ENSMUSG00000029714	Gigyf1	GRB10 interacting GYF protein 1	NM_031408
ENSMUSG00000028986	34.5728	1.45285	0.370667	3.91956	8.87108e-05	0.000582618	52323	ENSMUSG00000028986	Klhl7	kelch-like 7	NM_001161800
ENSMUSG00000038055	93.5941	1.45146	0.316296	4.58894	4.45493e-06	4.2157e-05	58239	ENSMUSG00000038055	Dexi	dexamethasone-induced transcript	NM_021428
ENSMUSG00000031826	121.197	1.44741	0.340483	4.25103	2.1279e-05	0.000166069	22224	ENSMUSG00000031826	Usp10	ubiquitin specific peptidase 10	NM_001310630
ENSMUSG00000013236	77.5735	1.44605	0.475374	3.04192	0.00235071	0.00960377	19280	ENSMUSG00000013236	Ptprs	protein tyrosine phosphatase, receptor type, S	NM_001252453
ENSMUSG00000015243	194.492	1.44496	0.417722	3.45915	0.000541882	0.00276599	11303	ENSMUSG00000015243	Abca1	ATP-binding cassette, sub-family A (ABC1), member 1	NM_013454
ENSMUSG00000052423	156.013	1.44456	0.258145	5.59592	2.19452e-08	3.50397e-07	57370	ENSMUSG00000052423	B4galt3	UDP-Gal:betaGlcNAc beta 1,4-galactosyltransferase, polypeptide 3	NM_020579
ENSMUSG00000003575	37.2419	1.43763	0.397447	3.61715	0.00029786	0.0016517	382056	ENSMUSG00000003575	Crtc1	CREB regulated transcription coactivator 1	NM_001004062
ENSMUSG00000018669	179.13	1.43677	0.273257	5.25794	1.45675e-07	1.93901e-06	80280	ENSMUSG00000018669	Cdk5rap3	CDK5 regulatory subunit associated protein 3	NM_001308183
ENSMUSG00000046806	104.239	1.43595	0.292188	4.91446	8.90257e-07	1.02376e-05	78412	ENSMUSG00000046806	Cyren	cell cycle regulator of NHEJ	NM_001135611
ENSMUSG00000031066	45.5641	1.43357	0.445309	3.21926	0.00128522	0.00579509	236733	ENSMUSG00000031066	Usp11	ubiquitin specific peptidase 11	NM_001358931
ENSMUSG00000024350	44.8614	1.43293	0.413313	3.46694	0.000526427	0.00269722	76594	ENSMUSG00000024350	Dnajc18	DnaJ heat shock protein family (Hsp40) member C18	NM_029669
ENSMUSG00000034761	36.0724	1.42361	0.343172	4.14839	3.34825e-05	0.000245916	399510	ENSMUSG00000034761	Map4k5	mitogen-activated protein kinase kinase kinase kinase 5	NM_201519
ENSMUSG00000037075	74.7219	1.42111	0.366747	3.87491	0.000106664	0.000685186	75841	ENSMUSG00000037075	Rnf139	ring finger protein 139	NM_175226
ENSMUSG00000015942	51.3189	1.42064	0.358936	3.95793	7.56016e-05	0.000506527	114674	ENSMUSG00000015942	Gtf2ird2	GTF2I repeat domain containing 2	NM_001359852
ENSMUSG00000015189	74.8383	1.42042	0.308553	4.6035	4.15445e-06	3.96901e-05	213819	ENSMUSG00000015189	Casd1	CAS1 domain containing 1	NM_145398
ENSMUSG00000035697	2018.04	1.41868	0.344417	4.11909	3.80377e-05	0.000274786	70719	ENSMUSG00000035697	Arhgap45	Rho GTPase activating protein 45	NM_001142701
ENSMUSG00000032350	97.0228	1.41428	0.354015	3.99497	6.47021e-05	0.000440204	14629	ENSMUSG00000032350	Gclc	glutamate-cysteine ligase, catalytic subunit	NM_010295
ENSMUSG00000028101	78.7744	1.41223	0.271995	5.19211	2.07923e-07	2.70734e-06	229615	ENSMUSG00000028101	Pias3	protein inhibitor of activated STAT 3	NM_001165949
ENSMUSG00000037300	99.3198	1.41161	0.357681	3.94657	7.92799e-05	0.000527627	234875	ENSMUSG00000037300	Ttc13	tetratricopeptide repeat domain 13	NM_001357355
ENSMUSG00000015776	181.477	1.41033	0.326621	4.31796	1.57477e-05	0.000127767	20933	ENSMUSG00000015776	Med22	mediator complex subunit 22	NM_001033908
ENSMUSG00000062691	121.634	1.40185	0.371572	3.77277	0.000161448	0.00098148	68554	ENSMUSG00000062691	Cebpzos	CCAAT/enhancer binding protein (C/EBP), zeta, opposite strand	NM_001177402
ENSMUSG00000004846	660.649	1.40181	0.336768	4.16253	3.14737e-05	0.000233339	26433	ENSMUSG00000004846	Plod3	procollagen-lysine, 2-oxoglutarate 5-dioxygenase 3	NM_011962
ENSMUSG00000032020	440.371	1.40092	0.382251	3.66493	0.000247406	0.00140954	72828	ENSMUSG00000032020	Ubash3b	ubiquitin associated and SH3 domain containing, B	NM_001357412
ENSMUSG00000038914	83.9114	1.39885	0.268052	5.21858	1.80303e-07	2.3615e-06	23856	ENSMUSG00000038914	Dido1	death inducer-obliterator 1	NM_001291432
ENSMUSG00000032344	89.6526	1.39728	0.351087	3.97986	6.89559e-05	0.000466388	214763	ENSMUSG00000032344	Cgas	cyclic GMP-AMP synthase	NM_173386
ENSMUSG00000020621	67.0579	1.39331	0.395821	3.52005	0.000431466	0.00227991	105014	ENSMUSG00000020621	Rdh14	retinol dehydrogenase 14 (all-trans and 9-cis)	NM_023697
ENSMUSG00000026856	75.1344	1.39083	0.338267	4.11162	3.92887e-05	0.000282817	57170	ENSMUSG00000026856	Dolpp1	dolichyl pyrophosphate phosphatase 1	NM_001290508
ENSMUSG00000021773	279.939	1.38965	0.362505	3.83346	0.000126356	0.000793956	69156	ENSMUSG00000021773	Comtd1	catechol-O-methyltransferase domain containing 1	NM_026965
ENSMUSG00000046897	166.087	1.38899	0.24534	5.66148	1.50076e-08	2.46735e-07	68744	ENSMUSG00000046897	Zfp740	zinc finger protein 740	NM_001289690
ENSMUSG00000021902	25.2716	1.3847	0.427934	3.23577	0.00121314	0.00550996	71838	ENSMUSG00000021902	Phf7	PHD finger protein 7	NM_001360624
ENSMUSG00000045598	63.6201	1.37995	0.336252	4.10392	4.062e-05	0.000291191	233887	ENSMUSG00000045598	Zfp553	zinc finger protein 553	NM_001360912
ENSMUSG00000051306	39.1744	1.37862	0.383869	3.59137	0.000328941	0.00179872	76800	ENSMUSG00000051306	Usp42	ubiquitin specific peptidase 42	NM_029749
ENSMUSG00000070705	30.2389	1.37861	0.361383	3.81482	0.000136284	0.000847797	434156	ENSMUSG00000070705	Eid2b	EP300 interacting inhibitor of differentiation 2B	NM_001177427
ENSMUSG00000008035	179.672	1.37668	0.379466	3.62794	0.000285694	0.0015931	68041	ENSMUSG00000008035	Mid1ip1	Mid1 interacting protein 1 (gastrulation specific G12-like (zebrafish))	NM_001166635
ENSMUSG00000036246	568.084	1.37186	0.261903	5.23803	1.62301e-07	2.13749e-06	78816	ENSMUSG00000036246	Gmip	Gem-interacting protein	NM_198101
ENSMUSG00000029723	1081.52	1.37077	0.2323	5.90087	3.61598e-09	6.84793e-08	78829	ENSMUSG00000029723	Tsc22d4	TSC22 domain family, member 4	NM_023910
ENSMUSG00000022621	27.1161	1.36939	0.391961	3.49368	0.000476406	0.00248605	68708	ENSMUSG00000022621	Rabl2	RAB, member RAS oncogene family-like 2	NM_026817
ENSMUSG00000036555	70.7625	1.3669	0.236304	5.78451	7.27237e-09	1.27852e-07	74239	ENSMUSG00000036555	Iqce	IQ motif containing E	NM_001347517
ENSMUSG00000021327	160.824	1.36634	0.274247	4.98217	6.28749e-07	7.45381e-06	72739	ENSMUSG00000021327	Zkscan3	zinc finger with KRAB and SCAN domains 3	NM_001145778
ENSMUSG00000003581	200.215	1.36524	0.221749	6.15672	7.42654e-10	1.60099e-08	71673	ENSMUSG00000003581	Rnf215	ring finger protein 215	NM_001363143
ENSMUSG00000039759	262.734	1.36354	0.260905	5.22618	1.73045e-07	2.27298e-06	69876	ENSMUSG00000039759	Thap3	THAP domain containing, apoptosis associated protein 3	NM_001145929
ENSMUSG00000002250	111.012	1.36316	0.416589	3.2722	0.00106715	0.00493681	19015	ENSMUSG00000002250	Ppard	peroxisome proliferator activator receptor delta	NM_011145
ENSMUSG00000031714	76.6019	1.36156	0.425489	3.19999	0.0013743	0.00612845	14388	ENSMUSG00000031714	Gab1	growth factor receptor bound protein 2-associated protein 1	NM_001301298
ENSMUSG00000068551	212.489	1.3592	0.439642	3.0916	0.00199083	0.00834076	68910	ENSMUSG00000068551	Zfp467	zinc finger protein 467	NM_001085415
ENSMUSG00000038517	278.423	1.35813	0.377538	3.59733	0.000321495	0.00176186	73174	ENSMUSG00000038517	Tbkbp1	TBK1 binding protein 1	NM_001372527
ENSMUSG00000054619	107.62	1.35666	0.291088	4.66064	3.15228e-06	3.11296e-05	70152	ENSMUSG00000054619	Mettl7a1	methyltransferase like 7A1	NM_027334
ENSMUSG00000032932	40.8723	1.35545	0.360477	3.76014	0.000169818	0.00102198	110920	ENSMUSG00000032932	Hspa13	heat shock protein 70 family, member 13	NM_030201
ENSMUSG00000045639	63.4094	1.35467	0.445134	3.04328	0.00234011	0.0095709	320683	ENSMUSG00000045639	Zfp629	zinc finger protein 629	NM_001362196
ENSMUSG00000044030	71.6006	1.35259	0.261023	5.18186	2.19685e-07	2.8481e-06	272359	ENSMUSG00000044030	Irf2bp1	interferon regulatory factor 2 binding protein 1	NM_178757
ENSMUSG00000024055	278.925	1.35168	0.244453	5.5294	3.21335e-08	4.94599e-07	170716	ENSMUSG00000024055	Cyp4f13	cytochrome P450, family 4, subfamily f, polypeptide 13	NM_130882
ENSMUSG00000031916	111.875	1.35029	0.281744	4.79261	1.64624e-06	1.75799e-05	97484	ENSMUSG00000031916	Cog8	component of oligomeric golgi complex 8	NM_139229
ENSMUSG00000032046	1834.89	1.34771	0.350172	3.84871	0.000118741	0.000751792	76192	ENSMUSG00000032046	Abhd12	abhydrolase domain containing 12	NM_001356549
ENSMUSG00000024969	331.472	1.34745	0.319265	4.22048	2.43779e-05	0.000186366	13728	ENSMUSG00000024969	Mark2	MAP/microtubule affinity regulating kinase 2	NM_001080388
ENSMUSG00000027082	57.548	1.34555	0.367703	3.65934	0.000252863	0.00143462	21788	ENSMUSG00000027082	Tfpi	tissue factor pathway inhibitor	NM_001177319
ENSMUSG00000019261	187.868	1.34394	0.172489	7.79144	6.62505e-15	3.32608e-13	270058	ENSMUSG00000019261	Map1s	microtubule-associated protein 1S	NM_173013
ENSMUSG00000034723	41.1529	1.34322	0.40837	3.28922	0.00100465	0.00470588	52837	ENSMUSG00000034723	Tmx4	thioredoxin-related transmembrane protein 4	NM_029148
ENSMUSG00000034175	49.3876	1.34164	0.432026	3.10545	0.00189987	0.00803391	279766	ENSMUSG00000034175	Rhbdd3	rhomboid domain containing 3	NM_001290491
ENSMUSG00000028467	73.3765	1.33938	0.297634	4.5001	6.7921e-06	6.12887e-05	230101	ENSMUSG00000028467	Gba2	glucosidase beta 2	NM_172692
ENSMUSG00000029439	202.927	1.33886	0.237357	5.64072	1.69342e-08	2.75984e-07	231769	ENSMUSG00000029439	Sfswap	splicing factor SWAP	NM_001035259
ENSMUSG00000055835	64.9361	1.33787	0.383043	3.49275	0.000478077	0.00249216	22640	ENSMUSG00000055835	Zfp1	zinc finger protein 1	NM_001037665
ENSMUSG00000028291	253.642	1.3356	0.334504	3.99276	6.53075e-05	0.000443516	433693	ENSMUSG00000028291	Akirin2	akirin 2	NM_001007589
ENSMUSG00000023277	713.291	1.33451	0.201261	6.63075	3.33986e-11	9.70245e-10	23999	ENSMUSG00000023277	Twf2	twinfilin actin binding protein 2	NM_011876
ENSMUSG00000074825	75.1126	1.33041	0.39306	3.38474	0.000712457	0.00351089	73338	ENSMUSG00000074825	Itpripl1	inositol 1,4,5-triphosphate receptor interacting protein-like 1	NM_001163527
ENSMUSG00000022671	220.581	1.32935	0.422261	3.14818	0.00164293	0.00712047	72083	ENSMUSG00000022671	Mzt2	mitotic spindle organizing protein 2	NM_001359003
ENSMUSG00000038538	292.3	1.32894	0.243753	5.452	4.98071e-08	7.32708e-07	320538	ENSMUSG00000038538	Ubn2	ubinuclein 2	NM_177185
ENSMUSG00000040913	239.458	1.32837	0.26524	5.00817	5.49506e-07	6.62463e-06	30838	ENSMUSG00000040913	Fbxw4	F-box and WD-40 domain protein 4	NM_013907
ENSMUSG00000000085	85.0945	1.32788	0.296402	4.48001	7.46389e-06	6.63895e-05	29871	ENSMUSG00000000085	Scmh1	sex comb on midleg homolog 1	NM_001159630
ENSMUSG00000038545	42.2341	1.3265	0.407217	3.25749	0.00112403	0.00516321	66515	ENSMUSG00000038545	Cul7	cullin 7	NM_025611
ENSMUSG00000046020	83.873	1.32403	0.262014	5.05326	4.34324e-07	5.31745e-06	140484	ENSMUSG00000046020	Pofut1	protein O-fucosyltransferase 1	NM_001039055
ENSMUSG00000025645	27.584	1.32399	0.333284	3.97257	7.11013e-05	0.00048003	66658	ENSMUSG00000025645	Ccdc51	coiled-coil domain containing 51	NM_025689
ENSMUSG00000020783	93.2101	1.32153	0.304241	4.34369	1.40112e-05	0.000116005	66874	ENSMUSG00000020783	Ncbp3	nuclear cap binding subunit 3	NM_025818
ENSMUSG00000028952	98.7258	1.32048	0.297451	4.43933	9.02393e-06	7.85839e-05	100090	ENSMUSG00000028952	Zbtb48	zinc finger and BTB domain containing 48	NM_133879
ENSMUSG00000041354	1179.67	1.3202	0.196981	6.70218	2.05328e-11	6.11936e-10	19732	ENSMUSG00000041354	Rgl2	ral guanine nucleotide dissociation stimulator-like 2	NM_009059
ENSMUSG00000031732	37.3729	1.31901	0.421858	3.12667	0.00176801	0.0075683	244650	ENSMUSG00000031732	Phlpp2	PH domain and leucine rich repeat protein phosphatase 2	NM_001122594
ENSMUSG00000049553	64.116	1.31458	0.339843	3.8682	0.000109642	0.000700708	20019	ENSMUSG00000049553	Polr1a	polymerase (RNA) I polypeptide A	NM_009088
ENSMUSG00000040620	64.2739	1.30946	0.363166	3.60569	0.000311326	0.00171556	216877	ENSMUSG00000040620	Dhx33	DEAH (Asp-Glu-Ala-His) box polypeptide 33	NM_178367
ENSMUSG00000020936	898.166	1.30884	0.270693	4.83515	1.33048e-06	1.46148e-05	18107	ENSMUSG00000020936	Nmt1	N-myristoyltransferase 1	NM_008707
ENSMUSG00000019809	57.4972	1.30389	0.3042	4.28629	1.81683e-05	0.000144737	56535	ENSMUSG00000019809	Pex3	peroxisomal biogenesis factor 3	NM_001164195
ENSMUSG00000030400	132.947	1.30379	0.263007	4.95724	7.15016e-07	8.40987e-06	13871	ENSMUSG00000030400	Ercc2	excision repair cross-complementing rodent repair deficiency, complementation group 2	NM_001363981
ENSMUSG00000026792	56.5927	1.3032	0.301848	4.31741	1.57868e-05	0.000128014	227738	ENSMUSG00000026792	Lrsam1	leucine rich repeat and sterile alpha motif containing 1	NM_199302
ENSMUSG00000028868	880.81	1.30247	0.242203	5.37759	7.54903e-08	1.06221e-06	242687	ENSMUSG00000028868	Wasf2	WAS protein family, member 2	NM_153423
ENSMUSG00000075595	164.783	1.30131	0.320598	4.05901	4.92821e-05	0.000346806	268469	ENSMUSG00000075595	Zfp652	zinc finger protein 652	NM_201609
ENSMUSG00000002059	53.3672	1.30108	0.421622	3.08589	0.00202943	0.00847203	19376	ENSMUSG00000002059	Rab34	RAB34, member RAS oncogene family	NM_001159482
ENSMUSG00000032855	184.004	1.29856	0.29098	4.46273	8.09229e-06	7.12169e-05	18763	ENSMUSG00000032855	Pkd1	polycystin 1, transient receptor poteintial channel interacting	NM_013630
ENSMUSG00000033705	254.866	1.29845	0.293202	4.42853	9.48754e-06	8.23336e-05	668880	ENSMUSG00000033705	Stard9	START domain containing 9	NM_001370940
ENSMUSG00000026842	320.288	1.29777	0.327544	3.96214	7.42821e-05	0.000498804	11350	ENSMUSG00000026842	Abl1	c-abl oncogene 1, non-receptor tyrosine kinase	NM_001112703
ENSMUSG00000022436	318.133	1.2967	0.38289	3.38661	0.000707608	0.00349159	20401	ENSMUSG00000022436	Sh3bp1	SH3-domain binding protein 1	NM_001316684
ENSMUSG00000025409	110.812	1.29476	0.289832	4.46727	7.92232e-06	7.00508e-05	110962	ENSMUSG00000025409	Mbd6	methyl-CpG binding domain protein 6	NM_001347171
ENSMUSG00000041890	456.055	1.29354	0.194631	6.64611	3.00938e-11	8.75941e-10	26431	ENSMUSG00000041890	Git2	GIT ArfGAP 2	NM_001077359
ENSMUSG00000021120	42.9803	1.28866	0.390823	3.2973	0.0009762	0.00460143	110417	ENSMUSG00000021120	Pigh	phosphatidylinositol glycan anchor biosynthesis, class H	NM_029988
ENSMUSG00000030083	130.21	1.28859	0.333181	3.86753	0.000109945	0.000701747	80283	ENSMUSG00000030083	Abtb1	ankyrin repeat and BTB (POZ) domain containing 1	NM_001362152
ENSMUSG00000052928	56.7884	1.28856	0.405224	3.17988	0.00147334	0.00648504	269037	ENSMUSG00000052928	Ctif	CBP80/20-dependent translation initiation factor	NM_201354
ENSMUSG00000005501	67.7427	1.28854	0.250685	5.14007	2.74643e-07	3.50293e-06	227334	ENSMUSG00000005501	Usp40	ubiquitin specific peptidase 40	NM_001033291
ENSMUSG00000039852	238.837	1.28772	0.353911	3.63855	0.000274175	0.00153573	68703	ENSMUSG00000039852	Rere	arginine glutamic acid dipeptide (RE) repeats	NM_001085492
ENSMUSG00000021947	176.158	1.2873	0.228139	5.64261	1.67487e-08	2.73258e-07	68631	ENSMUSG00000021947	Cryl1	crystallin, lambda 1	NM_030004
ENSMUSG00000020978	80.4624	1.28694	0.336167	3.82829	0.000129036	0.000809436	69554	ENSMUSG00000020978	Klhdc2	kelch domain containing 2	NM_027117
ENSMUSG00000042331	148.527	1.2855	0.402113	3.19685	0.00138937	0.00617356	432572	ENSMUSG00000042331	Specc1	sperm antigen with calponin homology and coiled-coil domains 1	NM_001029936
ENSMUSG00000039307	69.4827	1.28491	0.383566	3.34989	0.00080844	0.0039092	238023	ENSMUSG00000039307	Hexdc	hexosaminidase (glycosyl hydrolase family 20, catalytic domain) containing	NM_001001333
ENSMUSG00000040354	179.644	1.28254	0.241601	5.30851	1.10524e-07	1.49779e-06	216443	ENSMUSG00000040354	Mars	methionine-tRNA synthetase	NM_001003913
ENSMUSG00000028901	91.8367	1.28123	0.353537	3.62404	0.000290038	0.00161191	56809	ENSMUSG00000028901	Gmeb1	glucocorticoid modulatory element binding protein 1	NM_001122992
ENSMUSG00000042178	247.086	1.28035	0.287165	4.45859	8.24988e-06	7.23909e-05	233912	ENSMUSG00000042178	Armc5	armadillo repeat containing 5	NM_146205
ENSMUSG00000027569	52.0277	1.2793	0.341261	3.74873	0.00017773	0.00106429	73247	ENSMUSG00000027569	Mrgbp	MRG/MORF4L binding protein	NM_001356494
ENSMUSG00000029162	197.313	1.27676	0.258517	4.93878	7.8614e-07	9.16714e-06	16548	ENSMUSG00000029162	Khk	ketohexokinase	NM_001310524
ENSMUSG00000006442	257.692	1.27605	0.240072	5.3153	1.06484e-07	1.44935e-06	20810	ENSMUSG00000006442	Srm	spermidine synthase	NM_009272
ENSMUSG00000039844	228.436	1.27541	0.239791	5.31883	1.04437e-07	1.42302e-06	107746	ENSMUSG00000039844	Rapgef1	Rap guanine nucleotide exchange factor (GEF) 1	NM_001039086
ENSMUSG00000004896	122.858	1.27487	0.266473	4.78423	1.71644e-06	1.82254e-05	229503	ENSMUSG00000004896	Rrnad1	ribosomal RNA adenine dimethylase domain containing 1	NM_153562
ENSMUSG00000056698	49.4652	1.27465	0.339886	3.75022	0.000176683	0.00105988	232089	ENSMUSG00000056698	Elmod3	ELMO/CED-12 domain containing 3	NM_001253692
ENSMUSG00000040697	70.6316	1.27076	0.327919	3.87523	0.000106526	0.000684592	214063	ENSMUSG00000040697	Dnajc16	DnaJ heat shock protein family (Hsp40) member C16	NM_172338
ENSMUSG00000060166	123.332	1.27022	0.289222	4.39185	1.12392e-05	9.53769e-05	27801	ENSMUSG00000060166	Zdhhc8	zinc finger, DHHC domain containing 8	NM_172151
ENSMUSG00000042508	88.8859	1.26698	0.33097	3.82808	0.000129144	0.000809778	23857	ENSMUSG00000042508	Dmtf1	cyclin D binding myb-like transcription factor 1	NM_001110327
ENSMUSG00000042535	443.994	1.26695	0.310646	4.07845	4.53366e-05	0.000321613	14904	ENSMUSG00000042535	Gtpbp1	GTP binding protein 1	NM_013818
ENSMUSG00000038780	125.235	1.26591	0.336404	3.76307	0.000167843	0.00101172	75788	ENSMUSG00000038780	Smurf1	SMAD specific E3 ubiquitin protein ligase 1	NM_001038627
ENSMUSG00000060600	102.327	1.26522	0.414519	3.05226	0.00227122	0.0093505	13808	ENSMUSG00000060600	Eno3	enolase 3, beta muscle	NM_001136062
ENSMUSG00000038520	202.729	1.265	0.239458	5.28277	1.27248e-07	1.70893e-06	233204	ENSMUSG00000038520	Tbc1d17	TBC1 domain family, member 17	NM_001042655
ENSMUSG00000029550	160.728	1.26349	0.213255	5.92476	3.12747e-09	5.97575e-08	74585	ENSMUSG00000029550	Sppl3	signal peptide peptidase 3	NM_029012
ENSMUSG00000041515	1497.66	1.26344	0.387427	3.26111	0.00110976	0.00510549	15900	ENSMUSG00000041515	Irf8	interferon regulatory factor 8	NM_001301811
ENSMUSG00000068580	152.072	1.26317	0.236647	5.33779	9.40842e-08	1.29792e-06	72008	ENSMUSG00000068580	Zfyve19	zinc finger, FYVE domain containing 19	NM_001164827
ENSMUSG00000029213	369.811	1.26216	0.262479	4.80863	1.51968e-06	1.64515e-05	27784	ENSMUSG00000029213	Commd8	COMM domain containing 8	NM_001356611
ENSMUSG00000029146	450.029	1.26173	0.235298	5.36225	8.21924e-08	1.14495e-06	266781	ENSMUSG00000029146	Snx17	sorting nexin 17	NM_153680
ENSMUSG00000053483	268.819	1.26158	0.359565	3.50863	0.000450421	0.00236283	30941	ENSMUSG00000053483	Usp21	ubiquitin specific peptidase 21	NM_013919
ENSMUSG00000066306	243.661	1.25936	0.228151	5.51986	3.39262e-08	5.19519e-07	101706	ENSMUSG00000066306	Numa1	nuclear mitotic apparatus protein 1	NM_133947
ENSMUSG00000017664	719.35	1.25928	0.314418	4.00511	6.19877e-05	0.000423663	228875	ENSMUSG00000017664	Slc35c2	solute carrier family 35, member C2	NM_001252573
ENSMUSG00000022961	1830.41	1.25898	0.249741	5.04114	4.62757e-07	5.63329e-06	20658	ENSMUSG00000022961	Son	Son DNA binding protein	NM_019973
ENSMUSG00000035596	447.409	1.2577	0.218749	5.74953	8.94917e-09	1.54964e-07	77582	ENSMUSG00000035596	Mboat7	membrane bound O-acyltransferase domain containing 7	NM_029934
ENSMUSG00000005986	43.3392	1.25717	0.392713	3.20124	0.00136837	0.0061129	68423	ENSMUSG00000005986	Ankrd13d	ankyrin repeat domain 13 family, member D	NM_026720
ENSMUSG00000029545	199.797	1.25321	0.263948	4.74795	2.05486e-06	2.13788e-05	11409	ENSMUSG00000029545	Acads	acyl-Coenzyme A dehydrogenase, short chain	NM_007383
ENSMUSG00000010045	122.292	1.24861	0.249831	4.9978	5.79882e-07	6.94884e-06	56395	ENSMUSG00000010045	Tmem115	transmembrane protein 115	NM_019704
ENSMUSG00000041921	136.716	1.24847	0.318536	3.9194	8.87683e-05	0.000582739	66559	ENSMUSG00000041921	Metap1d	methionyl aminopeptidase type 1D (mitochondrial)	NM_025633
ENSMUSG00000020515	241.567	1.24686	0.237434	5.25139	1.50959e-07	2.0036e-06	69125	ENSMUSG00000020515	Cnot8	CCR4-NOT transcription complex, subunit 8	NM_001356477
ENSMUSG00000042594	402.414	1.2467	0.29369	4.24497	2.18622e-05	0.000169912	16923	ENSMUSG00000042594	Sh2b3	SH2B adaptor protein 3	NM_001306126
ENSMUSG00000038838	52.1485	1.24565	0.392703	3.17199	0.00151397	0.00662682	68915	ENSMUSG00000038838	Vars2	valyl-tRNA synthetase 2, mitochondrial	NM_175137
ENSMUSG00000000056	48.8837	1.2456	0.368738	3.37801	0.000730119	0.00358376	67608	ENSMUSG00000000056	Narf	nuclear prelamin A recognition factor	NM_026272
ENSMUSG00000032698	404.382	1.24374	0.258663	4.80835	1.52181e-06	1.6459e-05	16909	ENSMUSG00000032698	Lmo2	LIM domain only 2	NM_001142335
ENSMUSG00000026027	61.3482	1.24077	0.353671	3.50825	0.000451059	0.00236533	227154	ENSMUSG00000026027	Stradb	STE20-related kinase adaptor beta	NM_172656
ENSMUSG00000033697	224.617	1.24076	0.356779	3.47768	0.000505778	0.00260929	223666	ENSMUSG00000033697	Arhgap39	Rho GTPase activating protein 39	NM_001168288
ENSMUSG00000020277	172.057	1.2389	0.29438	4.2085	2.57066e-05	0.00019493	18641	ENSMUSG00000020277	Pfkl	phosphofructokinase, liver, B-type	NM_001358793
ENSMUSG00000047710	60.6442	1.23883	0.299308	4.139	3.48829e-05	0.000254825	101994	ENSMUSG00000047710	Champ1	chromosome alignment maintaining phosphoprotein 1	NM_001363455
ENSMUSG00000002668	337.578	1.23797	0.222495	5.56405	2.63589e-08	4.14238e-07	70785	ENSMUSG00000002668	Dennd1c	DENN/MADD domain containing 1C	NM_153551
ENSMUSG00000037415	140.172	1.23601	0.262493	4.70874	2.49251e-06	2.52133e-05	74334	ENSMUSG00000037415	Ranbp10	RAN binding protein 10	NM_145824
ENSMUSG00000025544	190.08	1.23443	0.358699	3.4414	0.000578714	0.00292703	68059	ENSMUSG00000025544	Tm9sf2	transmembrane 9 superfamily member 2	NM_080556
ENSMUSG00000031828	47.4838	1.23396	0.373665	3.30231	0.000958912	0.00453279	234796	ENSMUSG00000031828	Klhl36	kelch-like 36	NM_146219
ENSMUSG00000067370	52.319	1.23354	0.312345	3.94927	7.83883e-05	0.000522461	54218	ENSMUSG00000067370	B3galt4	UDP-Gal:betaGlcNAc beta 1,3-galactosyltransferase, polypeptide 4	NM_019420
ENSMUSG00000025572	167.016	1.23273	0.358763	3.43604	0.000590274	0.00297982	217353	ENSMUSG00000025572	Tmc6	transmembrane channel-like gene family 6	NM_145439
ENSMUSG00000034667	54.2275	1.23167	0.388343	3.17161	0.00151599	0.00663179	73192	ENSMUSG00000034667	Xpot	exportin, tRNA (nuclear export receptor for tRNAs)	NM_001081056
ENSMUSG00000034116	737.602	1.23092	0.242503	5.0759	3.85671e-07	4.76468e-06	22324	ENSMUSG00000034116	Vav1	vav 1 oncogene	NM_001163815
ENSMUSG00000005506	230.708	1.23044	0.187788	6.55228	5.66664e-11	1.56707e-09	13046	ENSMUSG00000005506	Celf1	CUGBP, Elav-like family member 1	NM_001244891
ENSMUSG00000031681	60.0636	1.22883	0.258507	4.75357	1.99854e-06	2.08512e-05	17125	ENSMUSG00000031681	Smad1	SMAD family member 1	NM_008539
ENSMUSG00000017764	31.04	1.22823	0.402648	3.05039	0.00228545	0.00939099	71971	ENSMUSG00000017764	Zswim1	zinc finger SWIM-type containing 1	NM_028028
ENSMUSG00000045482	99.768	1.22763	0.309817	3.96243	7.41901e-05	0.000498409	100683	ENSMUSG00000045482	Trrap	transformation/transcription domain-associated protein	NM_001081362
ENSMUSG00000001248	603.633	1.22757	0.279337	4.39457	1.10993e-05	9.43499e-05	52857	ENSMUSG00000001248	Gramd1a	GRAM domain containing 1A	NM_001360351
ENSMUSG00000048668	67.7561	1.22742	0.291365	4.21267	2.52371e-05	0.000191661	72440	ENSMUSG00000048668	Rhno1	RAD9-HUS1-RAD1 interacting nuclear orphan 1	NM_001326583
ENSMUSG00000049680	97.0623	1.22552	0.247943	4.94275	7.70281e-07	9.01735e-06	72046	ENSMUSG00000049680	Urgcp	upregulator of cell proliferation	NM_001077661
ENSMUSG00000037933	387.12	1.22402	0.314878	3.88729	0.000101371	0.000654841	76895	ENSMUSG00000037933	Bicd2	BICD cargo adaptor 2	NM_001039179
ENSMUSG00000028708	585.801	1.22271	0.270675	4.51728	6.26404e-06	5.68667e-05	17346	ENSMUSG00000028708	Mknk1	MAP kinase-interacting serine/threonine kinase 1	NM_001285487
ENSMUSG00000002105	159.715	1.22201	0.293688	4.16089	3.17005e-05	0.000234904	68427	ENSMUSG00000002105	Slc39a13	solute carrier family 39 (metal ion transporter), member 13	NM_001290765
ENSMUSG00000037049	163.821	1.22101	0.295032	4.13855	3.49502e-05	0.000255193	20597	ENSMUSG00000037049	Smpd1	sphingomyelin phosphodiesterase 1, acid lysosomal	NM_011421
ENSMUSG00000055805	857.91	1.21704	0.362739	3.35515	0.000793219	0.00383932	57778	ENSMUSG00000055805	Fmnl1	formin-like 1	NM_001077698
ENSMUSG00000070939	126.632	1.21511	0.37071	3.27778	0.00104627	0.00485825	73122	ENSMUSG00000070939	Tgfbrap1	transforming growth factor, beta receptor associated protein 1	NM_001013025
ENSMUSG00000013495	95.939	1.21253	0.305757	3.96566	7.31942e-05	0.000492161	72392	ENSMUSG00000013495	Tmem175	transmembrane protein 175	NM_001163531
ENSMUSG00000047388	172.708	1.21202	0.339486	3.57017	0.000356754	0.00192755	234776	ENSMUSG00000047388	Atmin	ATM interactor	NM_177700
ENSMUSG00000052395	101.595	1.21146	0.270296	4.48197	7.39558e-06	6.59781e-05	328370	ENSMUSG00000052395	Rft1	RFT1 homolog	NM_177815
ENSMUSG00000059981	213.43	1.2094	0.288148	4.19715	2.70295e-05	0.00020321	381921	ENSMUSG00000059981	Taok2	TAO kinase 2	NM_001163774
ENSMUSG00000033706	86.7502	1.20546	0.337098	3.57598	0.000348913	0.00189102	232187	ENSMUSG00000033706	Smyd5	SET and MYND domain containing 5	NM_144918
ENSMUSG00000041235	264.608	1.20298	0.353749	3.40066	0.000672224	0.00334516	320790	ENSMUSG00000041235	Chd7	chromodomain helicase DNA binding protein 7	NM_001033395
ENSMUSG00000026853	185.287	1.19853	0.328382	3.64981	0.000262433	0.00147938	12908	ENSMUSG00000026853	Crat	carnitine acetyltransferase	NM_007760
ENSMUSG00000026565	95.0097	1.19104	0.28845	4.12912	3.64152e-05	0.000264341	18986	ENSMUSG00000026565	Pou2f1	POU domain, class 2, transcription factor 1	NM_001368808
ENSMUSG00000042548	99.3389	1.19027	0.327058	3.63931	0.000273367	0.00153177	228790	ENSMUSG00000042548	Asxl1	additional sex combs like 1	NM_001039939
ENSMUSG00000020520	180.111	1.18858	0.290647	4.08943	4.32436e-05	0.000308521	171212	ENSMUSG00000020520	Galnt10	polypeptide N-acetylgalactosaminyltransferase 10	NM_134189
ENSMUSG00000001143	89.457	1.18836	0.293075	4.05479	5.01785e-05	0.000351625	214895	ENSMUSG00000001143	Lman2l	lectin, mannose-binding 2-like	NM_001013374
ENSMUSG00000019039	233.361	1.18536	0.342584	3.46005	0.000540081	0.00275867	67789	ENSMUSG00000019039	Dalrd3	DALR anticodon binding domain containing 3	NM_026378
ENSMUSG00000028854	142.539	1.1836	0.23454	5.04647	4.50053e-07	5.48757e-06	20544	ENSMUSG00000028854	Slc9a1	solute carrier family 9 (sodium/hydrogen exchanger), member 1	NM_001358455
ENSMUSG00000004798	138.795	1.18176	0.313129	3.77403	0.000160632	0.000977314	29869	ENSMUSG00000004798	Ulk2	unc-51 like kinase 2	NM_013881
ENSMUSG00000021870	78.1851	1.17926	0.309416	3.81123	0.000138279	0.000858352	83997	ENSMUSG00000021870	Slmap	sarcolemma associated protein	NM_001310445
ENSMUSG00000032440	482.931	1.17906	0.341689	3.45067	0.000559204	0.00284373	21813	ENSMUSG00000032440	Tgfbr2	transforming growth factor, beta receptor II	NM_009371
ENSMUSG00000024383	114.95	1.17889	0.361396	3.26205	0.00110609	0.00509176	26405	ENSMUSG00000024383	Map3k2	mitogen-activated protein kinase kinase kinase 2	NM_011946
ENSMUSG00000035181	93.0813	1.17887	0.339808	3.46923	0.000521951	0.00267612	320487	ENSMUSG00000035181	Heatr5a	HEAT repeat containing 5A	NM_177171
ENSMUSG00000011658	60.6962	1.17864	0.374165	3.15005	0.00163241	0.00707692	70300	ENSMUSG00000011658	Fuz	fuzzy planar cell polarity protein	NM_027376
ENSMUSG00000059772	82.2387	1.17802	0.241736	4.87318	1.09814e-06	1.22423e-05	75764	ENSMUSG00000059772	Slx1b	SLX1 structure-specific endonuclease subunit homolog B (S. cerevisiae)	NM_029420
ENSMUSG00000060261	353.825	1.17602	0.216511	5.43167	5.58299e-08	8.13312e-07	14886	ENSMUSG00000060261	Gtf2i	general transcription factor II I	NM_001080746
ENSMUSG00000031310	95.3831	1.17558	0.342387	3.43347	0.000595909	0.00300182	56364	ENSMUSG00000031310	Zmym3	zinc finger, MYM-type 3	NM_001177985
ENSMUSG00000032599	52.8186	1.17478	0.375718	3.12676	0.00176745	0.00756806	76500	ENSMUSG00000032599	Ip6k2	inositol hexaphosphate kinase 2	NM_029634
ENSMUSG00000036281	70.8229	1.1736	0.345612	3.3957	0.000684522	0.00339785	227644	ENSMUSG00000036281	Snapc4	small nuclear RNA activating complex, polypeptide 4	NM_001290419
ENSMUSG00000036438	970.688	1.17277	0.175563	6.68005	2.38865e-11	7.03476e-10	12314	ENSMUSG00000036438	Calm2	calmodulin 2	NM_001355703
ENSMUSG00000030793	660.14	1.17171	0.256962	4.55987	5.1186e-06	4.76736e-05	66824	ENSMUSG00000030793	Pycard	PYD and CARD domain containing	NM_023258
ENSMUSG00000042207	42.1053	1.17134	0.333845	3.50863	0.000450425	0.00236283	75605	ENSMUSG00000042207	Kdm5b	lysine (K)-specific demethylase 5B	NM_152895
ENSMUSG00000024855	83.9961	1.17062	0.227863	5.13737	2.7861e-07	3.54748e-06	107975	ENSMUSG00000024855	Pacs1	phosphofurin acidic cluster sorting protein 1	NM_001362451
ENSMUSG00000023018	82.3657	1.16826	0.345324	3.38309	0.000716741	0.00352619	83797	ENSMUSG00000023018	Smarcd1	SWI/SNF related, matrix associated, actin dependent regulator of chromatin, subfamily d, member 1	NM_031842
ENSMUSG00000022855	181.128	1.16777	0.353467	3.30377	0.000953943	0.00451501	75826	ENSMUSG00000022855	Senp2	SUMO/sentrin specific peptidase 2	NM_001357424
ENSMUSG00000009995	188.365	1.16634	0.307194	3.79675	0.000146603	0.000901814	66826	ENSMUSG00000009995	Taz	tafazzin	NM_001173547
ENSMUSG00000032089	763.846	1.16377	0.312195	3.7277	0.000193237	0.00114139	16154	ENSMUSG00000032089	Il10ra	interleukin 10 receptor, alpha	NM_001324486
ENSMUSG00000038366	415.025	1.16266	0.257299	4.51871	6.22163e-06	5.65159e-05	16796	ENSMUSG00000038366	Lasp1	LIM and SH3 protein 1	NM_010688
ENSMUSG00000025377	76.2991	1.16197	0.308606	3.76523	0.000166398	0.00100463	78777	ENSMUSG00000025377	Tepsin	TEPSIN, adaptor related protein complex 4 accessory protein	NM_183137
ENSMUSG00000062202	159.807	1.16083	0.286241	4.05544	5.00398e-05	0.000350818	224671	ENSMUSG00000062202	Btbd9	BTB (POZ) domain containing 9	NM_027060
ENSMUSG00000036568	58.0819	1.16039	0.331944	3.49575	0.00047274	0.00246864	210982	ENSMUSG00000036568	Bicral	BRD4 interacting chromatin remodeling complex associated protein like	NM_001100452
ENSMUSG00000032534	69.4123	1.15595	0.334748	3.45318	0.000554013	0.00281925	28135	ENSMUSG00000032534	Cep63	centrosomal protein 63	NM_001081122
ENSMUSG00000036054	83.4182	1.15579	0.351739	3.28594	0.00101644	0.00475069	234373	ENSMUSG00000036054	Sugp2	SURP and G patch domain containing 2	NM_001168290
ENSMUSG00000039158	143.59	1.15489	0.266366	4.33572	1.45282e-05	0.000119756	100182	ENSMUSG00000039158	Akna	AT-hook transcription factor	NM_001045514
ENSMUSG00000024193	78.1457	1.15448	0.25097	4.6001	4.22292e-06	4.02414e-05	21652	ENSMUSG00000024193	Phf1	PHD finger protein 1	NM_001302397
ENSMUSG00000039254	87.0561	1.15354	0.369844	3.119	0.00181464	0.0077259	99011	ENSMUSG00000039254	Pomt1	protein-O-mannosyltransferase 1	NM_145145
ENSMUSG00000015755	351.417	1.15276	0.285124	4.04303	5.27656e-05	0.000367175	68652	ENSMUSG00000015755	Tab2	TGF-beta activated kinase 1/MAP3K7 binding protein 2	NM_001359534
ENSMUSG00000045107	120.232	1.14875	0.195388	5.87932	4.11946e-09	7.69428e-08	67509	ENSMUSG00000045107	Saysd1	SAYSVFN motif domain containing 1	NM_026209
ENSMUSG00000020721	132.895	1.14747	0.234745	4.88816	1.01782e-06	1.14925e-05	78455	ENSMUSG00000020721	Helz	helicase with zinc finger domain	NM_001368755
ENSMUSG00000020921	65.6405	1.14543	0.368199	3.11091	0.00186512	0.00791158	76547	ENSMUSG00000020921	Tmem101	transmembrane protein 101	NM_029649
ENSMUSG00000002028	375.15	1.14371	0.261461	4.37431	1.21818e-05	0.00010262	214162	ENSMUSG00000002028	Kmt2a	lysine (K)-specific methyltransferase 2A	NM_001081049
ENSMUSG00000026510	49.3158	1.1412	0.264737	4.31069	1.62743e-05	0.000131225	209456	ENSMUSG00000026510	Trp53bp2	transformation related protein 53 binding protein 2	NM_173378
ENSMUSG00000054874	138.119	1.13995	0.22934	4.97056	6.67586e-07	7.89546e-06	104401	ENSMUSG00000054874	Pcnx3	pecanex homolog 3	NM_144868
ENSMUSG00000059316	118.812	1.13858	0.236852	4.80715	1.531e-06	1.65382e-05	26569	ENSMUSG00000059316	Slc27a4	solute carrier family 27 (fatty acid transporter), member 4	NM_011989
ENSMUSG00000024170	56.02	1.13763	0.32373	3.51413	0.000441189	0.00232335	71718	ENSMUSG00000024170	Telo2	telomere maintenance 2	NM_001163661
ENSMUSG00000079057	78.8492	1.13733	0.36294	3.13367	0.00172636	0.00741762	102294	ENSMUSG00000079057	Cyp4v3	cytochrome P450, family 4, subfamily v, polypeptide 3	NM_133969
ENSMUSG00000036580	75.1675	1.1372	0.344468	3.30133	0.000962273	0.00454437	229285	ENSMUSG00000036580	Spg20	spastic paraplegia 20, spartin (Troyer syndrome) homolog (human)	NM_001144987
ENSMUSG00000055065	595.389	1.13547	0.262696	4.32238	1.54354e-05	0.000125641	67040	ENSMUSG00000055065	Ddx17	DEAD (Asp-Glu-Ala-Asp) box polypeptide 17	NM_001040187
ENSMUSG00000019920	282.695	1.1343	0.276044	4.10913	3.97156e-05	0.000285666	110829	ENSMUSG00000019920	Lims1	LIM and senescent cell antigen-like domains 1	NM_001193303
ENSMUSG00000029145	133.276	1.13423	0.195085	5.81403	6.09857e-09	1.0927e-07	13667	ENSMUSG00000029145	Eif2b4	eukaryotic translation initiation factor 2B, subunit 4 delta	NM_001127355
ENSMUSG00000031399	98.862	1.13319	0.183355	6.18031	6.39766e-10	1.39731e-08	66294	ENSMUSG00000031399	Fam3a	family with sequence similarity 3, member A	NM_001313725
ENSMUSG00000021222	80.519	1.13203	0.237139	4.7737	1.80874e-06	1.90971e-05	73828	ENSMUSG00000021222	Dcaf4	DDB1 and CUL4 associated factor 4	NM_001165256
ENSMUSG00000040374	100.544	1.13109	0.372313	3.038	0.00238155	0.00970063	19302	ENSMUSG00000040374	Pex2	peroxisomal biogenesis factor 2	NM_001163301
ENSMUSG00000022965	715.013	1.13013	0.270315	4.18078	2.90514e-05	0.00021721	15980	ENSMUSG00000022965	Ifngr2	interferon gamma receptor 2	NM_008338
ENSMUSG00000029771	639.752	1.13005	0.261978	4.31352	1.60676e-05	0.000129869	27056	ENSMUSG00000029771	Irf5	interferon regulatory factor 5	NM_001252382
ENSMUSG00000035891	488.718	1.12994	0.305578	3.69773	0.000217539	0.00126245	223753	ENSMUSG00000035891	Cerk	ceramide kinase	NM_145475
ENSMUSG00000003099	433.435	1.1254	0.290963	3.86784	0.000109804	0.000701444	19060	ENSMUSG00000003099	Ppp5c	protein phosphatase 5, catalytic subunit	NM_011155
ENSMUSG00000036890	34.2504	1.12529	0.338881	3.32059	0.000898269	0.0042813	227835	ENSMUSG00000036890	Gtdc1	glycosyltransferase-like domain containing 1	NM_001362986
ENSMUSG00000038181	170.998	1.12353	0.260648	4.31055	1.62851e-05	0.000131225	100910	ENSMUSG00000038181	Chpf2	chondroitin polymerizing factor 2	NM_133913
ENSMUSG00000000134	418.056	1.123	0.235974	4.75901	1.94546e-06	2.03539e-05	209446	ENSMUSG00000000134	Tfe3	transcription factor E3	NM_001105196
ENSMUSG00000035051	65.0171	1.12188	0.262331	4.27657	1.89796e-05	0.000150081	106794	ENSMUSG00000035051	Dhx57	DEAH (Asp-Glu-Ala-Asp/His) box polypeptide 57	NM_001163759
ENSMUSG00000057541	34.6567	1.12074	0.313506	3.57486	0.000350416	0.00189613	78697	ENSMUSG00000057541	Pus7	pseudouridylate synthase 7	NM_001289780
ENSMUSG00000043683	93.4482	1.11847	0.26074	4.2896	1.78995e-05	0.000142824	14154	ENSMUSG00000043683	Fem1a	fem 1 homolog a	NM_010192
ENSMUSG00000043059	180.835	1.11793	0.245178	4.55968	5.12314e-06	4.76736e-05	101023	ENSMUSG00000043059	Zfp513	zinc finger protein 513	NM_001177901
ENSMUSG00000025209	32.5483	1.11791	0.318237	3.51282	0.000443376	0.00233076	226153	ENSMUSG00000025209	Twnk	twinkle mtDNA helicase	NM_001348254
ENSMUSG00000014763	90.8522	1.11743	0.27995	3.99152	6.5651e-05	0.000445444	67544	ENSMUSG00000014763	Fam120b	family with sequence similarity 120, member B	NM_001357822
ENSMUSG00000032513	73.7529	1.11631	0.351662	3.17439	0.00150149	0.00658378	74498	ENSMUSG00000032513	Gorasp1	golgi reassembly stacking protein 1	NM_028976
ENSMUSG00000015335	84.5691	1.11564	0.333281	3.34744	0.000815628	0.00394014	66220	ENSMUSG00000015335	Zdhhc12	zinc finger, DHHC domain containing 12	NM_001037762
ENSMUSG00000011257	55.6412	1.1138	0.298717	3.72863	0.000192523	0.00113847	230721	ENSMUSG00000011257	Pabpc4	poly(A) binding protein, cytoplasmic 4	NM_001356377
ENSMUSG00000024393	550.175	1.10842	0.232277	4.77196	1.82437e-06	1.9235e-05	53761	ENSMUSG00000024393	Prrc2a	proline-rich coiled-coil 2A	NM_001199044
ENSMUSG00000022779	93.4519	1.10756	0.24432	4.53325	5.8083e-06	5.31486e-05	21976	ENSMUSG00000022779	Top3b	topoisomerase (DNA) III beta	NM_001326576
ENSMUSG00000053293	174.387	1.10752	0.243942	4.54012	5.62231e-06	5.15729e-05	107939	ENSMUSG00000053293	Pom121	nuclear pore membrane protein 121	NM_148932
ENSMUSG00000031960	300.379	1.10563	0.196602	5.62371	1.86905e-08	3.01974e-07	234734	ENSMUSG00000031960	Aars	alanyl-tRNA synthetase	NM_146217
ENSMUSG00000022811	131.472	1.10538	0.31981	3.45638	0.00054748	0.00278885	22661	ENSMUSG00000022811	Zfp148	zinc finger protein 148	NM_001358569
ENSMUSG00000015542	93.9901	1.10374	0.340441	3.24209	0.00118656	0.00541388	66176	ENSMUSG00000015542	Nat9	N-acetyltransferase 9 (GCN5-related, putative)	NM_001362889
ENSMUSG00000039087	299.278	1.10288	0.26054	4.23304	2.30557e-05	0.000177894	68750	ENSMUSG00000039087	Rreb1	ras responsive element binding protein 1	NM_001013392
ENSMUSG00000070738	202.906	1.10228	0.281764	3.91206	9.15132e-05	0.000597091	227333	ENSMUSG00000070738	Dgkd	diacylglycerol kinase, delta	NM_177646
ENSMUSG00000062203	230.753	1.10119	0.21218	5.1899	2.10403e-07	2.73726e-06	14852	ENSMUSG00000062203	Gspt1	G1 to S phase transition 1	NM_001130008
ENSMUSG00000078484	82.3066	1.0985	0.209255	5.24955	1.52473e-07	2.0205e-06	#N/A	ENSMUSG00000078484	#N/A	#N/A	#N/A
ENSMUSG00000038642	12620.4	1.09849	0.361633	3.03759	0.00238478	0.00971112	13040	ENSMUSG00000038642	Ctss	cathepsin S	NM_001267695
ENSMUSG00000028811	118.302	1.09845	0.205909	5.33467	9.57196e-08	1.31623e-06	107271	ENSMUSG00000028811	Yars	tyrosyl-tRNA synthetase	NM_134151
ENSMUSG00000024120	76.1511	1.09778	0.307085	3.57485	0.000350426	0.00189613	72416	ENSMUSG00000024120	Lrpprc	leucine-rich PPR-motif containing	NM_028233
ENSMUSG00000068206	42.1199	1.09733	0.329732	3.32794	0.000874903	0.00418809	18693	ENSMUSG00000068206	Pick1	protein interacting with C kinase 1	NM_001045558
ENSMUSG00000043090	40.4472	1.09391	0.310877	3.51879	0.000433515	0.00228857	330788	ENSMUSG00000043090	Zfp866	zinc finger protein 866	NM_177899
ENSMUSG00000007603	179.397	1.09351	0.184518	5.92628	3.09868e-09	5.9435e-08	224907	ENSMUSG00000007603	Dus3l	dihydrouridine synthase 3-like (S. cerevisiae)	NM_001360405
ENSMUSG00000026786	727.875	1.09329	0.291648	3.74867	0.000177773	0.00106429	54519	ENSMUSG00000026786	Apbb1ip	amyloid beta (A4) precursor protein-binding, family B, member 1 interacting protein	NM_019456
ENSMUSG00000032580	448.26	1.0917	0.261522	4.17439	2.98783e-05	0.000222504	83486	ENSMUSG00000032580	Rbm5	RNA binding motif protein 5	NM_001359524
ENSMUSG00000031521	134.009	1.09092	0.32211	3.38679	0.000707167	0.00349057	11593	ENSMUSG00000031521	Aga	aspartylglucosaminidase	NM_001005847
ENSMUSG00000039427	180.668	1.09078	0.314237	3.47121	0.000518116	0.00266049	208211	ENSMUSG00000039427	Alg1	asparagine-linked glycosylation 1 (beta-1,4-mannosyltransferase)	NM_145362
ENSMUSG00000029617	187.705	1.0878	0.220112	4.94202	7.73154e-07	9.0439e-06	231874	ENSMUSG00000029617	Ccz1	CCZ1 vacuolar protein trafficking and biogenesis associated	NM_177682
ENSMUSG00000052917	32.8487	1.08726	0.353899	3.07224	0.00212457	0.00881955	66315	ENSMUSG00000052917	Senp7	SUMO1/sentrin specific peptidase 7	NM_001003971
ENSMUSG00000041241	86.2323	1.08598	0.229409	4.73381	2.20344e-06	2.2735e-05	68350	ENSMUSG00000041241	Mul1	mitochondrial ubiquitin ligase activator of NFKB 1	NM_026689
ENSMUSG00000031600	106.833	1.08556	0.311459	3.48542	0.000491372	0.0025455	52348	ENSMUSG00000031600	Vps37a	vacuolar protein sorting 37A	NM_033560
ENSMUSG00000024792	176.742	1.08461	0.233134	4.65229	3.28262e-06	3.2294e-05	81909	ENSMUSG00000024792	Zfpl1	zinc finger like protein 1	NM_001356994
ENSMUSG00000032596	381.43	1.08429	0.270994	4.00116	6.30334e-05	0.000429828	74153	ENSMUSG00000032596	Uba7	ubiquitin-like modifier activating enzyme 7	NM_023738
ENSMUSG00000038502	569.323	1.08222	0.285377	3.79225	0.00014929	0.000916509	84113	ENSMUSG00000038502	Ptov1	prostate tumor over expressed gene 1	NM_133949
ENSMUSG00000030801	72.3331	1.08216	0.29572	3.65942	0.000252791	0.00143462	67773	ENSMUSG00000030801	Kat8	K(lysine) acetyltransferase 8	NM_001360699
ENSMUSG00000024816	127.012	1.08145	0.321947	3.3591	0.000781957	0.00379586	67457	ENSMUSG00000024816	Frmd8	FERM domain containing 8	NM_026169
ENSMUSG00000031833	456.24	1.07794	0.242912	4.43755	9.09904e-06	7.91919e-05	546071	ENSMUSG00000031833	Mast3	microtubule associated serine/threonine kinase 3	NM_199308
ENSMUSG00000003847	120.388	1.07782	0.318858	3.38024	0.000724217	0.0035583	54446	ENSMUSG00000003847	Nfat5	nuclear factor of activated T cells 5	NM_001286260
ENSMUSG00000036503	416.437	1.07772	0.268128	4.01941	5.83439e-05	0.000402807	24017	ENSMUSG00000036503	Rnf13	ring finger protein 13	NM_001113413
ENSMUSG00000019975	57.2583	1.07546	0.29202	3.68283	0.000230656	0.00133124	67454	ENSMUSG00000019975	Ikbip	IKBKB interacting protein	NM_026166
ENSMUSG00000016510	74.5523	1.07118	0.24532	4.36645	1.26285e-05	0.000105609	76366	ENSMUSG00000016510	Mtif3	mitochondrial translational initiation factor 3	NM_001256100
ENSMUSG00000044252	45.9246	1.06924	0.25819	4.14128	3.45376e-05	0.000252673	64291	ENSMUSG00000044252	Osbpl1a	oxysterol binding protein-like 1A	NM_001252489
ENSMUSG00000004561	85.8373	1.06857	0.333113	3.20783	0.00133739	0.0059978	52535	ENSMUSG00000004561	Mettl17	methyltransferase like 17	NM_001029990
ENSMUSG00000021948	1152.2	1.06778	0.234275	4.5578	5.16911e-06	4.80342e-05	18753	ENSMUSG00000021948	Prkcd	protein kinase C, delta	NM_001310682
ENSMUSG00000026848	266.177	1.0665	0.242949	4.38983	1.13439e-05	9.61021e-05	30934	ENSMUSG00000026848	Tor1b	torsin family 1, member B	NM_133673
ENSMUSG00000061306	344.635	1.06598	0.209465	5.08908	3.59812e-07	4.47106e-06	72055	ENSMUSG00000061306	Slc38a10	solute carrier family 38, member 10	NM_001164798
ENSMUSG00000044857	290.159	1.06569	0.198176	5.37746	7.55427e-08	1.06221e-06	224640	ENSMUSG00000044857	Lemd2	LEM domain containing 2	NM_146075
ENSMUSG00000074733	61.2544	1.06398	0.341611	3.11459	0.00184202	0.00783356	414758	ENSMUSG00000074733	Zfp950	zinc finger protein 950	NM_001001737
ENSMUSG00000021900	81.8805	1.06112	0.342585	3.09739	0.00195231	0.00821158	26363	ENSMUSG00000021900	Btd	biotinidase	NM_001374217
ENSMUSG00000053935	42.9837	1.05858	0.307048	3.44759	0.000565605	0.00287237	#N/A	ENSMUSG00000053935	#N/A	#N/A	#N/A
ENSMUSG00000022516	197.803	1.05815	0.199158	5.31311	1.07771e-07	1.46312e-06	66911	ENSMUSG00000022516	Nudt16l1	nudix (nucleoside diphosphate linked moiety X)-type motif 16-like 1	NM_001316715
ENSMUSG00000029501	87.2982	1.05737	0.243833	4.33646	1.44798e-05	0.000119422	71782	ENSMUSG00000029501	Ankle2	ankyrin repeat and LEM domain containing 2	NM_001253814
ENSMUSG00000034793	156.798	1.05703	0.265917	3.97505	7.03633e-05	0.000475692	68401	ENSMUSG00000034793	G6pc3	glucose 6 phosphatase, catalytic, 3	NM_175935
ENSMUSG00000005505	58.9139	1.05546	0.27492	3.83914	0.000123465	0.000778738	67136	ENSMUSG00000005505	Kbtbd4	kelch repeat and BTB (POZ) domain containing 4	NM_001311116
ENSMUSG00000021109	96.8619	1.05498	0.322615	3.27009	0.00107512	0.00496556	15251	ENSMUSG00000021109	Hif1a	hypoxia inducible factor 1, alpha subunit	NM_001313919
ENSMUSG00000037349	109.907	1.05256	0.247041	4.26066	2.03827e-05	0.000159992	68323	ENSMUSG00000037349	Nudt22	nudix (nucleoside diphosphate linked moiety X)-type motif 22	NM_026675
ENSMUSG00000020346	532.435	1.05182	0.335551	3.13461	0.00172085	0.00740029	17308	ENSMUSG00000020346	Mgat1	mannoside acetylglucosaminyltransferase 1	NM_001110148
ENSMUSG00000039308	142.117	1.04997	0.339495	3.09275	0.0019831	0.00831536	17423	ENSMUSG00000039308	Ndst2	N-deacetylase/N-sulfotransferase (heparan glucosaminyl) 2	NM_010811
ENSMUSG00000037851	95.2603	1.04965	0.328223	3.19797	0.00138399	0.00615514	105148	ENSMUSG00000037851	Iars	isoleucine-tRNA synthetase	NM_172015
ENSMUSG00000013997	136.765	1.04937	0.204664	5.12727	2.9397e-07	3.73669e-06	27045	ENSMUSG00000013997	Nit1	nitrilase 1	NM_001242580
ENSMUSG00000021147	60.3192	1.04811	0.249561	4.19979	2.67162e-05	0.000201564	207615	ENSMUSG00000021147	Wdr37	WD repeat domain 37	NM_001039388
ENSMUSG00000039621	530.049	1.04724	0.309187	3.38709	0.000706376	0.00348782	277360	ENSMUSG00000039621	Prex1	phosphatidylinositol-3,4,5-trisphosphate-dependent Rac exchange factor 1	NM_177782
ENSMUSG00000032178	115.466	1.04545	0.334998	3.12076	0.00180386	0.00768876	16201	ENSMUSG00000032178	Ilf3	interleukin enhancer binding factor 3	NM_001042707
ENSMUSG00000032705	50.2715	1.04513	0.314708	3.32094	0.000897135	0.00427726	97827	ENSMUSG00000032705	Exd2	exonuclease 3'-5' domain containing 2	NM_133798
ENSMUSG00000023143	329.052	1.04434	0.268174	3.89426	9.84977e-05	0.000637932	27426	ENSMUSG00000023143	Nagpa	N-acetylglucosamine-1-phosphodiester alpha-N-acetylglucosaminidase	NM_013796
ENSMUSG00000028093	102.825	1.04347	0.339215	3.07613	0.00209708	0.00871915	66659	ENSMUSG00000028093	Acp6	acid phosphatase 6, lysophosphatidic	NM_019800
ENSMUSG00000031832	66.2883	1.04299	0.310273	3.36151	0.000775167	0.00376779	21341	ENSMUSG00000031832	Taf1c	TATA-box binding protein associated factor, RNA polymerase I, C	NM_021441
ENSMUSG00000022194	199.139	1.04296	0.291182	3.58181	0.000341225	0.00185706	12050	ENSMUSG00000022194	Bcl2l2	BCL2-like 2	NM_007537
ENSMUSG00000049504	111.801	1.04231	0.334148	3.11932	0.00181267	0.00771973	212127	ENSMUSG00000049504	Proser1	proline and serine rich 1	NM_173382
ENSMUSG00000031993	86.9277	1.04133	0.285282	3.65018	0.000262054	0.00147779	102607	ENSMUSG00000031993	Snx19	sorting nexin 19	NM_028874
ENSMUSG00000042524	389.728	1.03959	0.232834	4.46495	8.00864e-06	7.07304e-05	223697	ENSMUSG00000042524	Sun2	Sad1 and UNC84 domain containing 2	NM_001205345
ENSMUSG00000021666	58.6748	1.03949	0.340101	3.05642	0.00224	0.00924487	320806	ENSMUSG00000021666	Gfm2	G elongation factor, mitochondrial 2	NM_001146043
ENSMUSG00000030284	84.5769	1.03827	0.336155	3.08867	0.00201052	0.00840911	171508	ENSMUSG00000030284	Creld1	cysteine-rich with EGF-like domains 1	NM_133930
ENSMUSG00000018547	103.892	1.03723	0.255629	4.05756	4.95881e-05	0.000348467	108083	ENSMUSG00000018547	Pip4k2b	phosphatidylinositol-5-phosphate 4-kinase, type II, beta	NM_054051
ENSMUSG00000028149	386.804	1.03628	0.23718	4.36916	1.24728e-05	0.000104482	229877	ENSMUSG00000028149	Rap1gds1	RAP1, GTP-GDP dissociation stimulator 1	NM_001040690
ENSMUSG00000026158	571.405	1.03389	0.244089	4.23571	2.27832e-05	0.000176178	70155	ENSMUSG00000026158	Ogfrl1	opioid growth factor receptor-like 1	NM_001081079
ENSMUSG00000047888	224.996	1.03306	0.229053	4.51012	6.47903e-06	5.86405e-05	213988	ENSMUSG00000047888	Tnrc6b	trinucleotide repeat containing 6b	NM_144812
ENSMUSG00000022568	157.878	1.03251	0.240396	4.29503	1.74671e-05	0.000139821	105782	ENSMUSG00000022568	Scrib	scribbled planar cell polarity	NM_001310542
ENSMUSG00000001062	216.474	1.03208	0.27583	3.74174	0.000182748	0.00108755	72325	ENSMUSG00000001062	Vps9d1	VPS9 domain containing 1	NM_001310661
ENSMUSG00000038056	180.242	1.03142	0.290825	3.54652	0.00039035	0.00208526	231051	ENSMUSG00000038056	Kmt2c	lysine (K)-specific methyltransferase 2C	NM_001081383
ENSMUSG00000032763	124.536	1.03107	0.256365	4.0219	5.77299e-05	0.000398936	216136	ENSMUSG00000032763	Ilvbl	ilvB (bacterial acetolactate synthase)-like	NM_001359301
ENSMUSG00000026659	48.7072	1.03083	0.270717	3.80779	0.000140214	0.000868991	80915	ENSMUSG00000026659	Dusp12	dual specificity phosphatase 12	NM_001356485
ENSMUSG00000078681	199.091	1.02963	0.210972	4.88042	1.05858e-06	1.18868e-05	68634	ENSMUSG00000078681	Tm2d3	TM2 domain containing 3	NM_026795
ENSMUSG00000046679	77.2484	1.02823	0.283444	3.62763	0.000286031	0.00159378	232196	ENSMUSG00000046679	C87436	expressed sequence C87436	NM_001243741
ENSMUSG00000008958	390.958	1.02738	0.248842	4.12867	3.64867e-05	0.000264604	21427	ENSMUSG00000008958	Vps72	vacuolar protein sorting 72	NM_009336
ENSMUSG00000032570	73.8519	1.02659	0.31386	3.27084	0.00107227	0.00495436	235574	ENSMUSG00000032570	Atp2c1	ATPase, Ca++-sequestering	NM_001253831
ENSMUSG00000028857	201.328	1.02636	0.242175	4.2381	2.25415e-05	0.000174647	52174	ENSMUSG00000028857	Tmem222	transmembrane protein 222	NM_025667
ENSMUSG00000024082	77.5777	1.02593	0.211307	4.85514	1.20302e-06	1.33124e-05	73694	ENSMUSG00000024082	Ndufaf7	NADH:ubiquinone oxidoreductase complex assembly factor 7	NM_028611
ENSMUSG00000059555	92.1003	1.0241	0.329765	3.10555	0.00189923	0.00803346	227612	ENSMUSG00000059555	Tor4a	torsin family 4, member A	NM_146115
ENSMUSG00000031539	69.1483	1.02282	0.322381	3.1727	0.00151028	0.00661648	64933	ENSMUSG00000031539	Ap3m2	adaptor-related protein complex 3, mu 2 subunit	NM_001122820
ENSMUSG00000030733	197.854	1.02282	0.161554	6.33114	2.43358e-10	5.86294e-09	20399	ENSMUSG00000030733	Sh2b1	SH2B adaptor protein 1	NM_001081459
ENSMUSG00000018809	48.1347	1.0228	0.321488	3.18144	0.00146546	0.00645796	319822	ENSMUSG00000018809	Smyd4	SET and MYND domain containing 4	NM_001102611
ENSMUSG00000005078	192.733	1.02147	0.174715	5.84648	5.02097e-09	9.18321e-08	104771	ENSMUSG00000005078	Jkamp	JNK1/MAPK8-associated membrane protein	NM_001205067
ENSMUSG00000035297	224.119	1.02081	0.246802	4.13616	3.53163e-05	0.000257363	26891	ENSMUSG00000035297	Cops4	COP9 signalosome subunit 4	NM_001359203
ENSMUSG00000020523	344.186	1.02002	0.186453	5.47066	4.4837e-08	6.64342e-07	67726	ENSMUSG00000020523	Fam114a2	family with sequence similarity 114, member A2	NM_001168667
ENSMUSG00000029571	116.411	1.0179	0.3285	3.09863	0.00194419	0.00818344	71900	ENSMUSG00000029571	Tmem106b	transmembrane protein 106B	NM_027992
ENSMUSG00000030689	248.31	1.01634	0.208276	4.87977	1.06211e-06	1.19027e-05	233875	ENSMUSG00000030689	Ino80e	INO80 complex subunit E	NM_001370765
ENSMUSG00000039686	129.829	1.01537	0.283398	3.58283	0.000339887	0.00185221	227693	ENSMUSG00000039686	Zer1	zyg-11 related, cell cycle regulator	NM_001290503
ENSMUSG00000032329	64.6263	1.01349	0.284954	3.55668	0.000375565	0.00201464	66867	ENSMUSG00000032329	Hmg20a	high mobility group 20A	NM_025812
ENSMUSG00000041891	160.952	1.01285	0.258464	3.91872	8.90193e-05	0.000583619	70361	ENSMUSG00000041891	Lman1	lectin, mannose-binding, 1	NM_001172062
ENSMUSG00000013858	615.069	1.01187	0.271091	3.7326	0.000189515	0.0011229	216157	ENSMUSG00000013858	Tmem259	transmembrane protein 259	NM_001003949
ENSMUSG00000061758	363.511	1.01132	0.326691	3.09563	0.00196393	0.00825347	67861	ENSMUSG00000061758	Akr1b10	aldo-keto reductase family 1, member B10 (aldose reductase)	NM_172398
ENSMUSG00000038773	95.4627	1.01088	0.298735	3.38387	0.000714717	0.00351971	277250	ENSMUSG00000038773	Kdm3b	KDM3B lysine (K)-specific demethylase 3B	NM_001081256
ENSMUSG00000024962	376.288	1.01041	0.325527	3.10393	0.00190968	0.00806742	22340	ENSMUSG00000024962	Vegfb	vascular endothelial growth factor B	NM_001185164
ENSMUSG00000055296	180.667	1.01023	0.30877	3.2718	0.00106865	0.00494223	242474	ENSMUSG00000055296	Tmem245	transmembrane protein 245	NM_001369260
ENSMUSG00000021843	111.968	1.00292	0.272673	3.67813	0.000234954	0.00135146	16709	ENSMUSG00000021843	Ktn1	kinectin 1	NM_001293635
ENSMUSG00000029720	586.172	1.00255	0.28695	3.49383	0.00047615	0.00248558	#N/A	ENSMUSG00000029720	#N/A	#N/A	#N/A
ENSMUSG00000031143	93.4489	1.0021	0.268875	3.72702	0.000193757	0.00114372	54638	ENSMUSG00000031143	Ccdc22	coiled-coil domain containing 22	NM_138603

## Sheet: RPM
	baseMean	log2FoldChange	lfcSE	stat	pvalue	padj	entrez	ensembl	symbol	genename	refseq
ENSMUSG00000015854	375.209	10.174	1.36189	7.47046	7.99127e-14	3.03469e-11	11801	ENSMUSG00000015854	Cd5l	CD5 antigen-like	NM_009690
ENSMUSG00000035459	186.616	10.0242	2.26221	4.43113	9.37393e-06	0.000364065	192188	ENSMUSG00000035459	Stab2	stabilin 2	NM_138673
ENSMUSG00000026435	240.032	9.61245	1.35192	7.11023	1.15848e-12	3.59944e-10	212980	ENSMUSG00000026435	Slc45a3	solute carrier family 45, member 3	NM_001177628
ENSMUSG00000064225	33.3808	9.51285	1.4628	6.50319	7.86343e-11	1.45794e-08	75552	ENSMUSG00000064225	Paqr9	progestin and adipoQ receptor family member IX	NM_198414
ENSMUSG00000070369	401.533	9.3865	2.22548	4.21775	2.46755e-05	0.000803187	381924	ENSMUSG00000070369	Itgad	integrin, alpha D	NM_001029872
ENSMUSG00000046321	26.7121	9.32396	2.37532	3.92535	8.66038e-05	0.00218847	195646	ENSMUSG00000046321	Hs3st2	heparan sulfate (glucosamine) 3-O-sulfotransferase 2	NM_001081327
ENSMUSG00000086548	14.5715	9.28238	1.81859	5.10417	3.32243e-07	2.29398e-05	#N/A	ENSMUSG00000086548	#N/A	#N/A	#N/A
ENSMUSG00000039956	63.1916	9.24397	1.49513	6.18274	6.29978e-10	9.36133e-08	77037	ENSMUSG00000039956	Mrap	melanocortin 2 receptor accessory protein	NM_029844
ENSMUSG00000052131	44.0032	9.10399	1.34165	6.78566	1.15555e-11	2.98067e-09	11997	ENSMUSG00000052131	Akr1b7	aldo-keto reductase family 1, member B7	NM_009731
ENSMUSG00000035186	21.9365	9.00529	1.70702	5.27545	1.32431e-07	1.01143e-05	24108	ENSMUSG00000035186	Ubd	ubiquitin D	NM_023137
ENSMUSG00000028736	7.12576	8.66244	1.77083	4.89174	9.99474e-07	5.88958e-05	18509	ENSMUSG00000028736	Pax7	paired box 7	NM_011039
ENSMUSG00000032564	11.7849	8.63743	1.85799	4.64881	3.33856e-06	0.000162117	74020	ENSMUSG00000032564	Cpne4	copine IV	NM_001357439
ENSMUSG00000017969	79.4536	8.60051	1.0904	7.88746	3.08402e-15	1.68647e-12	19223	ENSMUSG00000017969	Ptgis	prostaglandin I2 (prostacyclin) synthase	NM_008968
ENSMUSG00000029361	19.0334	8.54119	1.92964	4.42632	9.58554e-06	0.000369138	18125	ENSMUSG00000029361	Nos1	nitric oxide synthase 1, neuronal	NM_008712
ENSMUSG00000013611	6.24337	8.43607	1.75665	4.80235	1.56816e-06	8.85881e-05	66696	ENSMUSG00000013611	Snx31	sorting nexin 31	NM_001347022
ENSMUSG00000036641	18.8135	8.43507	1.16352	7.24959	4.1804e-13	1.36072e-10	227933	ENSMUSG00000036641	Ccdc148	coiled-coil domain containing 148	NM_001001178
ENSMUSG00000035448	133.84	8.29688	1.0988	7.55086	4.32377e-14	1.8472e-11	12771	ENSMUSG00000035448	Ccr3	chemokine (C-C motif) receptor 3	NM_009914
ENSMUSG00000026442	9.39316	8.25543	1.9952	4.13765	3.50883e-05	0.00107074	269116	ENSMUSG00000026442	Nfasc	neurofascin	NM_001160316
ENSMUSG00000050666	46.4995	8.11058	1.50405	5.39247	6.94939e-08	5.82961e-06	320736	ENSMUSG00000050666	Vstm4	V-set and transmembrane domain containing 4	NM_001361602
ENSMUSG00000015354	45.3817	8.09631	1.50069	5.39504	6.85077e-08	5.822e-06	76477	ENSMUSG00000015354	Pcolce2	procollagen C-endopeptidase enhancer 2	NM_029620
ENSMUSG00000084989	4.70969	8.04999	2.22324	3.62083	0.000293662	0.00578481	381284	ENSMUSG00000084989	Crocc2	ciliary rootlet coiled-coil, rootletin family member 2	NM_001310428
ENSMUSG00000035275	6.00537	7.98192	1.98879	4.01344	5.98392e-05	0.00164932	242570	ENSMUSG00000035275	Raver2	ribonucleoprotein, PTB-binding 2	NM_183024
ENSMUSG00000047502	4.18613	7.8649	1.93195	4.07097	4.68185e-05	0.00134466	381538	ENSMUSG00000047502	Mroh7	maestro heat-like repeat family member 7	NM_001126487
ENSMUSG00000051497	56.2581	7.69025	1.02564	7.49798	6.48068e-14	2.6058e-11	16517	ENSMUSG00000051497	Kcnj16	potassium inwardly-rectifying channel, subfamily J, member 16	NM_001252207
ENSMUSG00000004359	383.14	7.48283	1.14767	6.51999	7.03104e-11	1.35382e-08	20728	ENSMUSG00000004359	Spic	Spi-C transcription factor (Spi-1/PU.1 related)	NM_011461
ENSMUSG00000026566	80.6381	7.41724	0.852643	8.69912	3.34475e-18	3.80804e-15	68481	ENSMUSG00000026566	Mpzl1	myelin protein zero-like 1	NM_001001880
ENSMUSG00000017002	741.217	7.33444	1.37221	5.345	9.04192e-08	7.40192e-06	20568	ENSMUSG00000017002	Slpi	secretory leukocyte peptidase inhibitor	NM_011414
ENSMUSG00000051839	4.73151	7.26971	1.71415	4.24101	2.22517e-05	0.000747427	14934	ENSMUSG00000051839	Gypa	glycophorin A	NM_010369
ENSMUSG00000051682	170.007	7.10355	1.79794	3.95093	7.78477e-05	0.00202258	224840	ENSMUSG00000051682	Treml4	triggering receptor expressed on myeloid cells-like 4	NM_001033922
ENSMUSG00000087248	4.59161	7.08643	1.48543	4.77063	1.83653e-06	9.7547e-05	#N/A	ENSMUSG00000087248	#N/A	#N/A	#N/A
ENSMUSG00000041481	96.0889	7.04848	1.53449	4.59336	4.36166e-06	0.000200095	20715	ENSMUSG00000041481	Serpina3g	serine (or cysteine) peptidase inhibitor, clade A, member 3G	NM_001353612
ENSMUSG00000006574	18.082	6.9585	1.45635	4.77805	1.77007e-06	9.56466e-05	20533	ENSMUSG00000006574	Slc4a1	solute carrier family 4 (anion exchanger), member 1	NM_011403
ENSMUSG00000028332	4.72286	6.72913	1.91803	3.50836	0.000450876	0.00799471	93966	ENSMUSG00000028332	Hemgn	hemogen	NM_053149
ENSMUSG00000027962	1655.76	6.71277	1.32146	5.07983	3.77768e-07	2.59521e-05	22329	ENSMUSG00000027962	Vcam1	vascular cell adhesion molecule 1	NM_011693
ENSMUSG00000037762	47.3353	6.67725	1.02128	6.53811	6.22993e-11	1.25249e-08	66859	ENSMUSG00000037762	Slc16a9	solute carrier family 16 (monocarboxylic acid transporters), member 9	NM_025807
ENSMUSG00000025993	812.683	6.56865	1.17003	5.6141	1.97587e-08	1.92944e-06	53945	ENSMUSG00000025993	Slc40a1	solute carrier family 40 (iron-regulated transporter), member 1	NM_016917
ENSMUSG00000047793	75.3135	6.52005	1.06702	6.11049	9.93233e-10	1.38556e-07	208777	ENSMUSG00000047793	Sned1	sushi, nidogen and EGF-like domains 1	NM_172463
ENSMUSG00000032890	79.8829	6.40757	1.49059	4.29867	1.71828e-05	0.00060364	242662	ENSMUSG00000032890	Rims3	regulating synaptic membrane exocytosis 3	NM_182929
ENSMUSG00000030087	18.3214	6.29747	1.22657	5.13422	2.83322e-07	1.96614e-05	66277	ENSMUSG00000030087	Klf15	Kruppel-like factor 15	NM_001355668
ENSMUSG00000048078	19.9891	6.20775	1.35818	4.57063	4.86261e-06	0.000220853	23966	ENSMUSG00000048078	Tenm4	teneurin transmembrane protein 4	NM_001310760
ENSMUSG00000028524	12.2063	6.16221	1.30119	4.73582	2.18167e-06	0.000112976	73094	ENSMUSG00000028524	Sgip1	SH3-domain GRB2-like (endophilin) interacting protein 1	NM_001285852
ENSMUSG00000029406	14.8639	6.05787	1.15524	5.24383	1.57275e-07	1.18137e-05	19679	ENSMUSG00000029406	Pitpnm2	phosphatidylinositol transfer protein, membrane-associated 2	NM_001289472
ENSMUSG00000022181	214.344	6.0387	1.60965	3.75157	0.000175734	0.00383295	12274	ENSMUSG00000022181	C6	complement component 6	NM_016704
ENSMUSG00000086825	5.65704	5.9768	1.32	4.52789	5.95754e-06	0.000257739	#N/A	ENSMUSG00000086825	#N/A	#N/A	#N/A
ENSMUSG00000067586	6.42481	5.97369	1.66198	3.59432	0.000325236	0.00627358	13610	ENSMUSG00000067586	S1pr3	sphingosine-1-phosphate receptor 3	NM_010101
ENSMUSG00000025911	11.0273	5.92162	1.51137	3.91806	8.92661e-05	0.0022433	76187	ENSMUSG00000025911	Adhfe1	alcohol dehydrogenase, iron containing, 1	NM_001357376
ENSMUSG00000028517	108.469	5.80203	0.847738	6.84413	7.69427e-12	2.1467e-09	67916	ENSMUSG00000028517	Plpp3	phospholipid phosphatase 3	NM_080555
ENSMUSG00000073940	408.221	5.66579	1.22063	4.64168	3.45583e-06	0.000165191	101488143	ENSMUSG00000073940	Hbb-bt	hemoglobin, beta adult t chain	NM_008220
ENSMUSG00000025270	16.8338	5.60694	1.25964	4.45122	8.5382e-06	0.000342304	11656	ENSMUSG00000025270	Alas2	aminolevulinic acid synthase 2, erythroid	NM_001102446
ENSMUSG00000024044	54.6421	5.58255	1.40524	3.97267	7.10728e-05	0.00188302	13823	ENSMUSG00000024044	Epb41l3	erythrocyte membrane protein band 4.1 like 3	NM_001355732
ENSMUSG00000025889	7.65884	5.56966	1.61677	3.44493	0.000571216	0.00966933	20617	ENSMUSG00000025889	Snca	synuclein, alpha	NM_001042451
ENSMUSG00000052305	1247.2	5.43472	0.979702	5.54732	2.90083e-08	2.75398e-06	15129	ENSMUSG00000052305	Hbb-b1	hemoglobin, beta adult major chain	NM_001278161
ENSMUSG00000002289	58.2128	5.42323	1.108	4.89463	9.84921e-07	5.83668e-05	57875	ENSMUSG00000002289	Angptl4	angiopoietin-like 4	NM_020581
ENSMUSG00000031596	18.3391	5.41641	1.26364	4.28634	1.81642e-05	0.000623927	11988	ENSMUSG00000031596	Slc7a2	solute carrier family 7 (cationic amino acid transporter, y+ system), member 2	NM_001044740
ENSMUSG00000038267	21.4506	5.39757	1.45396	3.71234	0.000205355	0.00431909	73102	ENSMUSG00000038267	Slc22a23	solute carrier family 22, member 23	NM_001033167
ENSMUSG00000044229	11.9957	5.29723	1.50724	3.51452	0.000440555	0.00786269	244853	ENSMUSG00000044229	Nxpe4	neurexophilin and PC-esterase domain family, member 4	NM_172921
ENSMUSG00000022235	51.4939	5.29719	1.27691	4.14844	3.34752e-05	0.00103575	69574	ENSMUSG00000022235	Cmbl	carboxymethylenebutenolidase-like (Pseudomonas)	NM_181588
ENSMUSG00000032915	126.307	5.27473	1.05192	5.01439	5.32023e-07	3.4308e-05	52614	ENSMUSG00000032915	Adgre4	adhesion G protein-coupled receptor E4	NM_139138
ENSMUSG00000072596	67.1747	5.20516	1.08722	4.78756	1.68818e-06	9.26874e-05	13587	ENSMUSG00000072596	Ear2	eosinophil-associated, ribonuclease A family, member 2	NM_007895
ENSMUSG00000006930	138.559	5.15366	1.39478	3.69495	0.000219929	0.00455552	15114	ENSMUSG00000006930	Hap1	huntingtin-associated protein 1	NM_001359052
ENSMUSG00000021268	20.6436	5.14558	1.42855	3.60197	0.000315818	0.00612418	17263	ENSMUSG00000021268	Meg3	maternally expressed 3	NM_144513
ENSMUSG00000043740	87.385	5.12251	1.04371	4.90798	9.20184e-07	5.61599e-05	320148	ENSMUSG00000043740	B430306N03Rik	RIKEN cDNA B430306N03 gene	NM_177083
ENSMUSG00000022272	30.0863	4.82654	1.12591	4.2868	1.81265e-05	0.000623927	17909	ENSMUSG00000022272	Myo10	myosin X	NM_001353141
ENSMUSG00000069917	242.825	4.79575	0.92265	5.1978	2.01666e-07	1.42848e-05	110257	ENSMUSG00000069917	Hba-a2	hemoglobin alpha, adult chain 2	NM_001083955
ENSMUSG00000025020	8.72439	4.76251	1.38688	3.43397	0.000594815	0.0098926	20562	ENSMUSG00000025020	Slit1	slit guidance ligand 1	NM_015748
ENSMUSG00000029299	397.473	4.75603	0.940047	5.05936	4.20671e-07	2.78408e-05	27405	ENSMUSG00000029299	Abcg3	ATP binding cassette subfamily G member 3	NM_030239
ENSMUSG00000066684	219.791	4.75051	1.19057	3.9901	6.60454e-05	0.00178462	170741	ENSMUSG00000066684	Pilrb1	paired immunoglobin-like type 2 receptor beta 1	NM_133209
ENSMUSG00000002108	184.814	4.74539	1.30808	3.62775	0.0002859	0.00565635	22259	ENSMUSG00000002108	Nr1h3	nuclear receptor subfamily 1, group H, member 3	NM_001177730
ENSMUSG00000036585	18.7941	4.73135	1.23714	3.82443	0.000131073	0.00305317	14164	ENSMUSG00000036585	Fgf1	fibroblast growth factor 1	NM_010197
ENSMUSG00000027030	31.5208	4.72751	1.06851	4.42442	9.67033e-06	0.000370317	53416	ENSMUSG00000027030	Stk39	serine/threonine kinase 39	NM_016866
ENSMUSG00000054115	71.0499	4.70353	0.485964	9.67877	3.7117e-22	1.01485e-18	27401	ENSMUSG00000054115	Skp2	S-phase kinase-associated protein 2 (p45)	NM_001285980
ENSMUSG00000024330	53.6406	4.60059	1.05487	4.36129	1.29297e-05	0.00047011	12815	ENSMUSG00000024330	Col11a2	collagen, type XI, alpha 2	NM_001317722
ENSMUSG00000023031	199.743	4.56505	1.02711	4.44456	8.80718e-06	0.000349444	109901	ENSMUSG00000023031	Cela1	chymotrypsin-like elastase family, member 1	NM_033612
ENSMUSG00000075254	16.9687	4.56397	1.063	4.29347	1.75899e-05	0.000612082	77446	ENSMUSG00000075254	Heg1	heart development protein with EGF-like domains 1	NM_172934
ENSMUSG00000040564	81.0021	4.55138	1.10559	4.1167	3.84339e-05	0.00114473	11812	ENSMUSG00000040564	Apoc1	apolipoprotein C-I	NM_001110009
ENSMUSG00000059810	16.4489	4.45452	0.74749	5.95931	2.53301e-09	3.17695e-07	50780	ENSMUSG00000059810	Rgs3	regulator of G-protein signaling 3	NM_001081650
ENSMUSG00000066682	173.277	4.44212	1.05149	4.22461	2.39355e-05	0.000786591	545812	ENSMUSG00000066682	Pilrb2	paired immunoglobin-like type 2 receptor beta 2	NM_001024932
ENSMUSG00000039485	12.6775	4.32145	0.831274	5.19859	2.00803e-07	1.42848e-05	72480	ENSMUSG00000039485	Tspyl4	TSPY-like 4	NM_030203
ENSMUSG00000026399	16.1122	4.31972	1.19647	3.61039	0.000305743	0.00597115	13136	ENSMUSG00000026399	Cd55	CD55 molecule, decay accelerating factor for complement	NM_010016
ENSMUSG00000032946	119.832	4.29585	1.11238	3.86185	0.000112531	0.00270848	19395	ENSMUSG00000032946	Rasgrp2	RAS, guanyl releasing protein 2	NM_001365062
ENSMUSG00000024654	49.0048	4.26714	0.800797	5.32862	9.89609e-08	8.00529e-06	66514	ENSMUSG00000024654	Asrgl1	asparaginase like 1	NM_025610
ENSMUSG00000034438	269.719	4.23328	1.10692	3.82439	0.000131096	0.00305317	76074	ENSMUSG00000034438	Gbp8	guanylate-binding protein 8	NM_029509
ENSMUSG00000028076	125.705	4.23208	0.8779	4.82069	1.43064e-06	8.21776e-05	12479	ENSMUSG00000028076	Cd1d1	CD1d1 antigen	NM_007639
ENSMUSG00000038291	59.3148	4.19703	0.776791	5.40304	6.5522e-08	5.63366e-06	102141	ENSMUSG00000038291	Snx25	sorting nexin 25	NM_001372342
ENSMUSG00000037679	134.768	4.15497	1.12341	3.69855	0.000216838	0.00451643	70435	ENSMUSG00000037679	Inf2	inverted formin, FH2 and WH2 domain containing	NM_001374199
ENSMUSG00000023079	65.0206	4.13148	0.850022	4.86044	1.17128e-06	6.83117e-05	57080	ENSMUSG00000023079	Gtf2ird1	general transcription factor II I repeat domain-containing 1	NM_001081462
ENSMUSG00000087362	14.5132	4.1302	1.16126	3.55664	0.000375631	0.00690222	672763	ENSMUSG00000087362	Gm13710	predicted gene 13710	NR_046046
ENSMUSG00000069919	459.177	4.10741	1.11121	3.69635	0.000218718	0.00453731	15122	ENSMUSG00000069919	Hba-a1	hemoglobin alpha, adult chain 1	NM_008218
ENSMUSG00000005413	3595.31	4.0534	1.03262	3.92535	8.66028e-05	0.00218847	15368	ENSMUSG00000005413	Hmox1	heme oxygenase 1	NM_010442
ENSMUSG00000079037	54.267	4.04739	0.954154	4.24186	2.21678e-05	0.000746443	19122	ENSMUSG00000079037	Prnp	prion protein	NM_001278256
ENSMUSG00000015143	423.92	4.03343	0.90233	4.47001	7.82143e-06	0.000322069	109711	ENSMUSG00000015143	Actn1	actinin, alpha 1	NM_001346669
ENSMUSG00000026994	49.9054	4.01384	1.13363	3.54068	0.000399097	0.007217	14425	ENSMUSG00000026994	Galnt3	polypeptide N-acetylgalactosaminyltransferase 3	NM_015736
ENSMUSG00000022218	9.7666	4.00708	1.16438	3.44138	0.000578747	0.00971902	21816	ENSMUSG00000022218	Tgm1	transglutaminase 1, K polypeptide	NM_001161714
ENSMUSG00000034614	49.5464	3.9932	0.751533	5.3134	1.07596e-07	8.47199e-06	216505	ENSMUSG00000034614	Pik3ip1	phosphoinositide-3-kinase interacting protein 1	NM_178149
ENSMUSG00000009292	299.988	3.93554	1.09684	3.58806	0.000333146	0.00637877	28240	ENSMUSG00000009292	Trpm2	transient receptor potential cation channel, subfamily M, member 2	NM_138301
ENSMUSG00000039470	9.36627	3.91998	1.07882	3.63358	0.000279516	0.00555417	70546	ENSMUSG00000039470	Zdhhc2	zinc finger, DHHC domain containing 2	NM_001357249
ENSMUSG00000057191	399.154	3.86796	0.960096	4.02873	5.60801e-05	0.00157427	382062	ENSMUSG00000057191	AB124611	cDNA sequence AB124611	NM_001198794
ENSMUSG00000027843	114.062	3.85265	0.740645	5.20175	1.97424e-07	1.42051e-05	19260	ENSMUSG00000027843	Ptpn22	protein tyrosine phosphatase, non-receptor type 22 (lymphoid)	NM_008979
ENSMUSG00000027901	25.2822	3.84557	0.956942	4.0186	5.85442e-05	0.00163006	72121	ENSMUSG00000027901	Dennd2d	DENN/MADD domain containing 2D	NM_001093754
ENSMUSG00000020108	342.618	3.84323	0.883851	4.34828	1.37212e-05	0.000491671	74747	ENSMUSG00000020108	Ddit4	DNA-damage-inducible transcript 4	NM_029083
ENSMUSG00000038058	99.7405	3.80345	0.8957	4.24634	2.17287e-05	0.000733463	107607	ENSMUSG00000038058	Nod1	nucleotide-binding oligomerization domain containing 1	NM_001171007
ENSMUSG00000034853	37.0607	3.70116	0.974473	3.79812	0.000145799	0.00333314	329910	ENSMUSG00000034853	Acot11	acyl-CoA thioesterase 11	NM_001347159
ENSMUSG00000070427	76.0268	3.65322	0.963069	3.79331	0.000148652	0.0033814	16068	ENSMUSG00000070427	Il18bp	interleukin 18 binding protein	NM_001363982
ENSMUSG00000062373	76.5614	3.55314	0.657616	5.40306	6.55142e-08	5.63366e-06	74868	ENSMUSG00000062373	Tmem65	transmembrane protein 65	NM_175212
ENSMUSG00000019838	128.372	3.49796	0.978482	3.57488	0.000350383	0.00660702	72472	ENSMUSG00000019838	Slc16a10	solute carrier family 16 (monocarboxylic acid transporters), member 10	NM_001114332
ENSMUSG00000037370	81.4955	3.48939	0.937078	3.72369	0.000196335	0.00420704	18605	ENSMUSG00000037370	Enpp1	ectonucleotide pyrophosphatase/phosphodiesterase 1	NM_001308327
ENSMUSG00000032679	10.6861	3.48906	0.633432	5.50818	3.6257e-08	3.3719e-06	12509	ENSMUSG00000032679	Cd59a	CD59a antigen	NM_001111060
ENSMUSG00000027200	142.93	3.47589	1.00508	3.45832	0.000543546	0.00930014	214968	ENSMUSG00000027200	Sema6d	sema domain, transmembrane domain (TM), and cytoplasmic domain, (semaphorin) 6D	NM_001290997
ENSMUSG00000015702	34.9011	3.41242	0.531787	6.41689	1.39086e-10	2.40689e-08	71790	ENSMUSG00000015702	Anxa9	annexin A9	NM_001085383
ENSMUSG00000031523	20.1384	3.38918	0.877504	3.86229	0.000112327	0.00270833	50768	ENSMUSG00000031523	Dlc1	deleted in liver cancer 1	NM_001194940
ENSMUSG00000031824	122.6	3.3467	0.594413	5.63025	1.79946e-08	1.76981e-06	234797	ENSMUSG00000031824	6430548M08Rik	RIKEN cDNA 6430548M08 gene	NM_001163760
ENSMUSG00000025154	101.616	3.27764	0.881887	3.71662	0.000201905	0.00427997	71085	ENSMUSG00000025154	Arhgap19	Rho GTPase activating protein 19	NM_001163495
ENSMUSG00000025995	83.1259	3.271	0.416295	7.85741	3.92162e-15	2.06202e-12	73674	ENSMUSG00000025995	Wdr75	WD repeat domain 75	NM_028599
ENSMUSG00000057530	76.9748	3.26277	0.612569	5.32638	1.00191e-07	8.05716e-06	230857	ENSMUSG00000057530	Ece1	endothelin converting enzyme 1	NM_001369177
ENSMUSG00000039585	95.0075	3.26246	0.693529	4.70415	2.54927e-06	0.00012766	270163	ENSMUSG00000039585	Myo9a	myosin IXa	NM_173018
ENSMUSG00000048677	100.068	3.24732	0.702998	4.61924	3.85153e-06	0.000180942	233979	ENSMUSG00000048677	Tpcn2	two pore segment channel 2	NM_146206
ENSMUSG00000042029	35.1112	3.2112	0.82781	3.87915	0.000104822	0.00256353	76044	ENSMUSG00000042029	Ncapg2	non-SMC condensin II complex, subunit G2	NM_133762
ENSMUSG00000031483	129.202	3.19503	0.496112	6.44015	1.19358e-10	2.09198e-08	244373	ENSMUSG00000031483	Erlin2	ER lipid raft associated 2	NM_001364476
ENSMUSG00000061666	74.8583	3.16628	0.890065	3.55736	0.000374607	0.00690196	66569	ENSMUSG00000061666	Gdpd1	glycerophosphodiester phosphodiesterase domain containing 1	NM_025638
ENSMUSG00000044702	12.0164	3.16558	0.726627	4.35654	1.32133e-05	0.000479148	233826	ENSMUSG00000044702	Palb2	partner and localizer of BRCA2	NM_001081238
ENSMUSG00000046324	56.6616	3.14442	0.756267	4.15782	3.21302e-05	0.00100286	226090	ENSMUSG00000046324	Ermp1	endoplasmic reticulum metallopeptidase 1	NM_001081213
ENSMUSG00000081534	709.747	3.13211	0.395054	7.9283	2.22168e-15	1.27565e-12	67739	ENSMUSG00000081534	Slc48a1	solute carrier family 48 (heme transporter), member 1	NM_026353
ENSMUSG00000073557	81.3407	3.09558	0.803128	3.8544	0.000116012	0.00278246	329251	ENSMUSG00000073557	Ppp1r12b	protein phosphatase 1, regulatory subunit 12B	NM_001081307
ENSMUSG00000030930	75.5141	3.08761	0.804832	3.83634	0.000124881	0.00293943	77590	ENSMUSG00000030930	Chst15	carbohydrate sulfotransferase 15	NM_001360768
ENSMUSG00000020577	465.365	3.07109	0.883053	3.47781	0.000505524	0.00876494	66109	ENSMUSG00000020577	Tspan13	tetraspanin 13	NM_025359
ENSMUSG00000062510	15.8081	3.03528	0.695013	4.36722	1.25838e-05	0.000461216	381318	ENSMUSG00000062510	Nsl1	NSL1, MIS12 kinetochore complex component	NM_198654
ENSMUSG00000037656	33.742	3.02603	0.678124	4.46235	8.10649e-06	0.000330817	20516	ENSMUSG00000037656	Slc20a2	solute carrier family 20, member 2	NM_011394
ENSMUSG00000022221	98.3103	2.93114	0.694514	4.22042	2.43848e-05	0.000795619	56532	ENSMUSG00000022221	Ripk3	receptor-interacting serine-threonine kinase 3	NM_001164107
ENSMUSG00000015202	31.2467	2.91768	0.650802	4.48321	7.35274e-06	0.000308276	215748	ENSMUSG00000015202	Cnksr3	Cnksr family member 3	NM_172546
ENSMUSG00000021069	75.3635	2.87543	0.592771	4.85083	1.22946e-06	7.122e-05	110095	ENSMUSG00000021069	Pygl	liver glycogen phosphorylase	NM_133198
ENSMUSG00000020589	115.895	2.85983	0.768704	3.72032	0.000198968	0.00423691	76820	ENSMUSG00000020589	Fam49a	family with sequence similarity 49, member A	NM_001146119
ENSMUSG00000040111	120.436	2.85433	0.287993	9.91108	3.7259e-23	1.27342e-19	235283	ENSMUSG00000040111	Gramd1b	GRAM domain containing 1B	NM_001357617
ENSMUSG00000040713	1350.11	2.83819	0.448113	6.33364	2.39447e-10	3.94649e-08	433375	ENSMUSG00000040713	Creg1	cellular repressor of E1A-stimulated genes 1	NM_011804
ENSMUSG00000019843	165.841	2.82744	0.616267	4.58802	4.47471e-06	0.000204594	14360	ENSMUSG00000019843	Fyn	Fyn proto-oncogene	NM_001122892
ENSMUSG00000001249	24.374	2.74354	0.794828	3.45173	0.000556998	0.0094869	15451	ENSMUSG00000001249	Hpn	hepsin	NM_001110252
ENSMUSG00000021275	45.4969	2.72305	0.767179	3.54944	0.000386056	0.00705912	104859	ENSMUSG00000021275	Tecpr2	tectonin beta-propeller repeat containing 2	NM_001081057
ENSMUSG00000055013	150.343	2.68167	0.654969	4.09435	4.23347e-05	0.00123931	347722	ENSMUSG00000055013	Agap1	ArfGAP with GTPase domain, ankyrin repeat and PH domain 1	NM_001037136
ENSMUSG00000055334	40.3877	2.67381	0.571469	4.67884	2.88499e-06	0.000142901	66069	ENSMUSG00000055334	Snupn	snurportin 1	NM_178374
ENSMUSG00000014786	12.0318	2.6572	0.734335	3.61852	0.000296297	0.00582831	277973	ENSMUSG00000014786	Slc9a5	solute carrier family 9 (sodium/hydrogen exchanger), member 5	NM_001081332
ENSMUSG00000034652	491.112	2.65214	0.628081	4.2226	2.41499e-05	0.000791734	217303	ENSMUSG00000034652	Cd300a	CD300A molecule	NM_001347654
ENSMUSG00000038170	105.499	2.63934	0.636238	4.14836	3.34871e-05	0.00103575	83679	ENSMUSG00000038170	Pde4dip	phosphodiesterase 4D interacting protein (myomegalin)	NM_001039376
ENSMUSG00000037410	162.406	2.63436	0.5587	4.71516	2.41522e-06	0.000122745	67016	ENSMUSG00000037410	Tbc1d2b	TBC1 domain family, member 2B	NM_194334
ENSMUSG00000028896	67.3757	2.61666	0.6192	4.22587	2.3802e-05	0.00078409	100088	ENSMUSG00000028896	Rcc1	regulator of chromosome condensation 1	NM_001197082
ENSMUSG00000026421	212.047	2.61308	0.758778	3.4438	0.000573602	0.00968112	13007	ENSMUSG00000026421	Csrp1	cysteine and glycine-rich protein 1	NM_001360782
ENSMUSG00000014778	149.315	2.59599	0.577879	4.49227	7.04684e-06	0.000300195	234686	ENSMUSG00000014778	Fhod1	formin homology 2 domain containing 1	NM_177699
ENSMUSG00000073002	173.711	2.58495	0.604773	4.27425	1.91779e-05	0.000655453	53620	ENSMUSG00000073002	Vamp5	vesicle-associated membrane protein 5	NM_001080742
ENSMUSG00000021936	61.5979	2.5732	0.421971	6.09805	1.07371e-09	1.43909e-07	26419	ENSMUSG00000021936	Mapk8	mitogen-activated protein kinase 8	NM_001310452
ENSMUSG00000038068	40.985	2.57105	0.671319	3.82985	0.000128219	0.00300151	218215	ENSMUSG00000038068	Rnf144b	ring finger protein 144B	NM_001170643
ENSMUSG00000073678	19.381	2.55957	0.651573	3.92829	8.55532e-05	0.00217397	241062	ENSMUSG00000073678	Pgap1	post-GPI attachment to proteins 1	NM_001163314
ENSMUSG00000033416	108.283	2.55575	0.601085	4.2519	2.11965e-05	0.000717269	68778	ENSMUSG00000033416	Gucd1	guanylyl cyclase domain containing 1	NM_001347201
ENSMUSG00000046027	152.482	2.54439	0.703339	3.61759	0.000297354	0.00584069	170460	ENSMUSG00000046027	Stard5	StAR-related lipid transfer (START) domain containing 5	NM_023377
ENSMUSG00000021203	36.0016	2.53934	0.665904	3.81337	0.000137086	0.00316571	68149	ENSMUSG00000021203	Otub2	OTU domain, ubiquitin aldehyde binding 2	NM_001177841
ENSMUSG00000028917	335.749	2.53219	0.379835	6.66655	2.61878e-11	6.06803e-09	69582	ENSMUSG00000028917	Plekhm2	pleckstrin homology domain containing, family M (with RUN domain) member 2	NM_001033150
ENSMUSG00000031485	145.775	2.49862	0.559675	4.46441	8.0288e-06	0.000328628	114863	ENSMUSG00000031485	Plpbp	pyridoxal phosphate binding protein	NM_001039077
ENSMUSG00000043336	379.96	2.49656	0.439387	5.68192	1.33194e-08	1.40069e-06	78749	ENSMUSG00000043336	Filip1l	filamin A interacting protein 1-like	NM_001040397
ENSMUSG00000022389	146.409	2.48855	0.641329	3.8803	0.000104328	0.00255604	21685	ENSMUSG00000022389	Tef	thyrotroph embryonic factor	NM_017376
ENSMUSG00000004707	196.477	2.43497	0.60013	4.0574	4.96214e-05	0.00141623	17085	ENSMUSG00000004707	Ly9	lymphocyte antigen 9	NM_001277968
ENSMUSG00000045414	43.7435	2.43083	0.555333	4.37726	1.20183e-05	0.00044769	68861	ENSMUSG00000045414	Dipk2a	divergent protein kinase domain 2A	NM_001033145
ENSMUSG00000039682	308.953	2.42591	0.645436	3.75857	0.000170891	0.00375602	66988	ENSMUSG00000039682	Lap3	leucine aminopeptidase 3	NM_024434
ENSMUSG00000041483	49.4225	2.42489	0.643202	3.77003	0.000163228	0.00361285	226442	ENSMUSG00000041483	Zfp281	zinc finger protein 281	NM_001160251
ENSMUSG00000037685	253.127	2.39654	0.67151	3.56888	0.000358511	0.00669509	11980	ENSMUSG00000037685	Atp8a1	ATPase, aminophospholipid transporter (APLT), class I, type 8A, member 1	NM_001038999
ENSMUSG00000020263	195.36	2.31963	0.499556	4.64339	3.42742e-06	0.000164408	216190	ENSMUSG00000020263	Appl2	adaptor protein, phosphotyrosine interaction, PH domain and leucine zipper containing 2	NM_145220
ENSMUSG00000027215	1162.96	2.3077	0.63688	3.62345	0.0002907	0.00573471	12521	ENSMUSG00000027215	Cd82	CD82 antigen	NM_001136055
ENSMUSG00000037936	221.925	2.28869	0.540255	4.23631	2.2722e-05	0.000757078	20778	ENSMUSG00000037936	Scarb1	scavenger receptor class B, member 1	NM_001205082
ENSMUSG00000021752	54.9133	2.27922	0.631158	3.61117	0.000304824	0.00596173	71393	ENSMUSG00000021752	Kctd6	potassium channel tetramerisation domain containing 6	NM_001305936
ENSMUSG00000032468	81.6843	2.26668	0.431411	5.25411	1.48746e-07	1.12409e-05	74125	ENSMUSG00000032468	Armc8	armadillo repeat containing 8	NM_001166138
ENSMUSG00000020812	55.3446	2.23855	0.576801	3.88098	0.000104035	0.00255344	66293	ENSMUSG00000020812	Snhg16	small nucleolar RNA host gene 16	NM_025472
ENSMUSG00000035004	398.388	2.21477	0.584448	3.7895	0.00015095	0.00342119	80719	ENSMUSG00000035004	Igsf6	immunoglobulin superfamily, member 6	NM_030691
ENSMUSG00000036528	148.289	2.20926	0.558317	3.957	7.58979e-05	0.00198015	19024	ENSMUSG00000036528	Ppfibp2	PTPRF interacting protein, binding protein 2 (liprin beta 2)	NM_001163557
ENSMUSG00000026104	320.714	2.15282	0.523675	4.11098	3.93978e-05	0.00116835	20846	ENSMUSG00000026104	Stat1	signal transducer and activator of transcription 1	NM_001205313
ENSMUSG00000036622	948.6	2.1333	0.349304	6.10728	1.01341e-09	1.39942e-07	74772	ENSMUSG00000036622	Atp13a2	ATPase type 13A2	NM_001164366
ENSMUSG00000018697	76.1139	2.13189	0.429609	4.9624	6.96281e-07	4.40688e-05	56321	ENSMUSG00000018697	Aatf	apoptosis antagonizing transcription factor	NM_019816
ENSMUSG00000070327	196.274	2.11026	0.481725	4.38062	1.1834e-05	0.00044203	672511	ENSMUSG00000070327	Rnf213	ring finger protein 213	NM_001040005
ENSMUSG00000002103	625.266	2.08854	0.560205	3.72818	0.00019287	0.00415887	11432	ENSMUSG00000002103	Acp2	acid phosphatase 2, lysosomal	NM_001357067
ENSMUSG00000029298	53.3289	2.07789	0.602004	3.45162	0.000557236	0.0094869	236573	ENSMUSG00000029298	Gbp9	guanylate-binding protein 9	NM_172777
ENSMUSG00000030760	126.981	2.07135	0.601549	3.44336	0.000574532	0.00968486	66190	ENSMUSG00000030760	Acer3	alkaline ceramidase 3	NM_001360615
ENSMUSG00000036333	151.812	2.02769	0.433943	4.67271	2.97244e-06	0.000146443	77480	ENSMUSG00000036333	Kidins220	kinase D-interacting substrate 220	NM_001081378
ENSMUSG00000021072	223.026	2.02189	0.333498	6.06268	1.33872e-09	1.74301e-07	72736	ENSMUSG00000021072	Tmx1	thioredoxin-related transmembrane protein 1	NM_028339
ENSMUSG00000028124	151.396	2.02179	0.368002	5.49397	3.93006e-08	3.6059e-06	14630	ENSMUSG00000028124	Gclm	glutamate-cysteine ligase, modifier subunit	NM_008129
ENSMUSG00000024781	537.937	2.02097	0.56633	3.56854	0.000358972	0.00669509	16889	ENSMUSG00000024781	Lipa	lysosomal acid lipase A	NM_001111100
ENSMUSG00000027332	152.487	2.015	0.409116	4.92525	8.42519e-07	5.16506e-05	56357	ENSMUSG00000027332	Ivd	isovaleryl coenzyme A dehydrogenase	NM_019826
ENSMUSG00000002332	276.363	2.00709	0.36777	5.45747	4.82962e-08	4.3438e-06	52585	ENSMUSG00000002332	Dhrs1	dehydrogenase/reductase (SDR family) member 1	NM_026819
ENSMUSG00000045100	38.1469	2.0005	0.497121	4.02418	5.71747e-05	0.00159844	67582	ENSMUSG00000045100	Slc25a26	solute carrier family 25 (mitochondrial carrier, phosphate carrier), member 26	NM_026255
ENSMUSG00000035245	55.0588	1.98412	0.553317	3.58588	0.000335949	0.00641447	101351	ENSMUSG00000035245	Eogt	EGF domain-specific O-linked N-acetylglucosamine (GlcNAc) transferase	NM_175313
ENSMUSG00000015355	470.329	1.98035	0.450138	4.39943	1.08537e-05	0.00040989	12506	ENSMUSG00000015355	Cd48	CD48 antigen	NM_001360767
ENSMUSG00000089872	91.7464	1.92261	0.478343	4.01932	5.8366e-05	0.00162841	320119	ENSMUSG00000089872	Rps6kc1	ribosomal protein S6 kinase polypeptide 1	NM_178775
ENSMUSG00000026456	99.5169	1.90284	0.481974	3.94801	7.88037e-05	0.00203653	72017	ENSMUSG00000026456	Cyb5r1	cytochrome b5 reductase 1	NM_001355133
ENSMUSG00000089788	56.302	1.88946	0.463367	4.07767	4.5489e-05	0.00131754	#N/A	ENSMUSG00000089788	#N/A	#N/A	#N/A
ENSMUSG00000052656	56.8997	1.87724	0.532056	3.52828	0.000418269	0.007514	22644	ENSMUSG00000052656	Rnf103	ring finger protein 103	NM_001308303
ENSMUSG00000027187	117.813	1.8651	0.471179	3.95836	7.54666e-05	0.001974	12359	ENSMUSG00000027187	Cat	catalase	NM_009804
ENSMUSG00000027522	426.386	1.86197	0.331848	5.61091	2.01271e-08	1.95147e-06	228960	ENSMUSG00000027522	Stx16	syntaxin 16	NM_001102423
ENSMUSG00000026116	113.675	1.85507	0.489874	3.78683	0.000152582	0.00344216	56030	ENSMUSG00000026116	Tmem131	transmembrane protein 131	NM_018872
ENSMUSG00000006611	636.772	1.85352	0.449044	4.12771	3.66399e-05	0.00110331	15216	ENSMUSG00000006611	Hfe	homeostatic iron regulator	NM_001347493
ENSMUSG00000072770	172.614	1.8358	0.516538	3.55405	0.00037935	0.00695186	54137	ENSMUSG00000072770	Acrbp	proacrosin binding protein	NM_001127340
ENSMUSG00000031712	73.8612	1.82875	0.515288	3.54899	0.000386709	0.00705912	16168	ENSMUSG00000031712	Il15	interleukin 15	NM_001254747
ENSMUSG00000005514	303.162	1.8267	0.408155	4.47552	7.62271e-06	0.000315788	18984	ENSMUSG00000005514	Por	P450 (cytochrome) oxidoreductase	NM_008898
ENSMUSG00000017718	98.8292	1.81878	0.528622	3.44061	0.000580406	0.00972393	71562	ENSMUSG00000017718	Afmid	arylformamidase	NM_001363158
ENSMUSG00000036023	176.368	1.8061	0.301267	5.99504	2.0344e-09	2.6238e-07	11546	ENSMUSG00000036023	Parp2	poly (ADP-ribose) polymerase family, member 2	NM_009632
ENSMUSG00000045216	250.455	1.79829	0.483301	3.72084	0.000198558	0.00423584	50785	ENSMUSG00000045216	Hs6st1	heparan sulfate 6-O-sulfotransferase 1	NM_015818
ENSMUSG00000052031	25.3536	1.78306	0.460262	3.87401	0.000107058	0.00259963	380608	ENSMUSG00000052031	Tagap1	T cell activation GTPase activating protein 1	NM_147155
ENSMUSG00000026991	127.776	1.76501	0.506615	3.48393	0.000494109	0.00861733	227937	ENSMUSG00000026991	Pkp4	plakophilin 4	NM_001362990
ENSMUSG00000029998	273.853	1.7626	0.464385	3.79556	0.000147309	0.00336203	66881	ENSMUSG00000029998	Pcyox1	prenylcysteine oxidase 1	NM_001355687
ENSMUSG00000040365	243.116	1.75683	0.473332	3.71162	0.000205936	0.00432466	211007	ENSMUSG00000040365	Trim41	tripartite motif-containing 41	NM_145377
ENSMUSG00000036188	40.1382	1.74993	0.446087	3.92285	8.75079e-05	0.00220723	217473	ENSMUSG00000036188	Ankmy2	ankyrin repeat and MYND domain containing 2	NM_146033
ENSMUSG00000025036	153.146	1.74124	0.425646	4.09082	4.29843e-05	0.00125296	94279	ENSMUSG00000025036	Sfxn2	sideroflexin 2	NM_053196
ENSMUSG00000031875	642.657	1.73688	0.404095	4.29818	1.72204e-05	0.00060364	68119	ENSMUSG00000031875	Cmtm3	CKLF-like MARVEL transmembrane domain containing 3	NM_024217
ENSMUSG00000035367	78.5343	1.72056	0.4641	3.7073	0.000209482	0.00438566	74386	ENSMUSG00000035367	Rmi1	RecQ mediated genome instability 1	NM_001168248
ENSMUSG00000038437	128.007	1.71019	0.437121	3.91241	9.13808e-05	0.00227968	246198	ENSMUSG00000038437	Mllt6	myeloid/lymphoid or mixed-lineage leukemia; translocated to, 6	NM_139311
ENSMUSG00000028165	206.588	1.69918	0.38286	4.43812	9.07491e-06	0.000356503	67006	ENSMUSG00000028165	Cisd2	CDGSH iron sulfur domain 2	NM_025902
ENSMUSG00000015846	356.878	1.69749	0.471867	3.59739	0.000321427	0.00621531	20181	ENSMUSG00000015846	Rxra	retinoid X receptor alpha	NM_001290481
ENSMUSG00000026395	1178.53	1.69357	0.425983	3.97568	7.01798e-05	0.00186297	19264	ENSMUSG00000026395	Ptprc	protein tyrosine phosphatase, receptor type, C	NM_001111316
ENSMUSG00000039745	96.0311	1.66162	0.479923	3.46227	0.000535643	0.00921104	53415	ENSMUSG00000039745	Htatip2	HIV-1 Tat interactive protein 2	NM_001146049
ENSMUSG00000027601	23.8773	1.65324	0.448101	3.68943	0.000224759	0.00462174	67472	ENSMUSG00000027601	Mtfr1	mitochondrial fission regulator 1	NM_001253390
ENSMUSG00000022906	106.565	1.64388	0.407175	4.03728	5.40747e-05	0.00152618	80285	ENSMUSG00000022906	Parp9	poly (ADP-ribose) polymerase family, member 9	NM_030253
ENSMUSG00000038034	604.777	1.62096	0.439361	3.68936	0.000224816	0.00462174	140559	ENSMUSG00000038034	Igsf8	immunoglobulin superfamily, member 8	NM_080419
ENSMUSG00000030047	418.646	1.6117	0.422509	3.8146	0.000136404	0.0031553	232201	ENSMUSG00000030047	Arhgap25	Rho GTPase activating protein 25	NM_001037727
ENSMUSG00000001552	306.879	1.61128	0.417678	3.85771	0.000114454	0.00274991	16480	ENSMUSG00000001552	Jup	junction plakoglobin	NM_010593
ENSMUSG00000042404	247.972	1.6049	0.362977	4.4215	9.80197e-06	0.000374309	229541	ENSMUSG00000042404	Dennd4b	DENN/MADD domain containing 4B	NM_001356483
ENSMUSG00000002699	298.663	1.57991	0.355525	4.44388	8.83504e-06	0.000349444	16822	ENSMUSG00000002699	Lcp2	lymphocyte cytosolic protein 2	NM_010696
ENSMUSG00000026896	93.4792	1.57782	0.38292	4.12049	3.78066e-05	0.00113193	71586	ENSMUSG00000026896	Ifih1	interferon induced with helicase C domain 1	NM_001164477
ENSMUSG00000026307	86.5457	1.57645	0.4033	3.90888	9.2724e-05	0.0023006	50880	ENSMUSG00000026307	Scly	selenocysteine lyase	NM_016717
ENSMUSG00000028059	528.419	1.56737	0.369707	4.23948	2.24039e-05	0.000750695	16800	ENSMUSG00000028059	Arhgef2	rho/rac guanine nucleotide exchange factor (GEF) 2	NM_001198911
ENSMUSG00000020366	123.371	1.56019	0.41658	3.74524	0.000180222	0.00391704	26420	ENSMUSG00000020366	Mapk9	mitogen-activated protein kinase 9	NM_001163671
ENSMUSG00000031938	128.793	1.5586	0.435394	3.57976	0.000343915	0.00652103	70984	ENSMUSG00000031938	4931406C07Rik	RIKEN cDNA 4931406C07 gene	NM_001199484
ENSMUSG00000025413	89.0796	1.55364	0.424689	3.65831	0.000253888	0.00511934	72354	ENSMUSG00000025413	Ttc4	tetratricopeptide repeat domain 4	NM_001172073
ENSMUSG00000043940	208.79	1.5457	0.412025	3.75148	0.000175792	0.00383295	72145	ENSMUSG00000043940	Wdfy3	WD repeat and FYVE domain containing 3	NM_172882
ENSMUSG00000040033	314.397	1.52061	0.373142	4.07516	4.59823e-05	0.00132621	20847	ENSMUSG00000040033	Stat2	signal transducer and activator of transcription 2	NM_019963
ENSMUSG00000026019	53.7473	1.51859	0.383599	3.95879	7.53312e-05	0.001974	57750	ENSMUSG00000026019	Wdr12	WD repeat domain 12	NM_001199060
ENSMUSG00000031534	123.694	1.50962	0.350417	4.30805	1.64697e-05	0.000583311	102032	ENSMUSG00000031534	Smim19	small integral membrane protein 19	NM_001012667
ENSMUSG00000039100	95.4488	1.48858	0.426771	3.48801	0.000486628	0.00852634	223455	ENSMUSG00000039100	March6	membrane-associated ring finger (C3HC4) 6	NM_172606
ENSMUSG00000020321	785.982	1.48803	0.338106	4.40107	1.07718e-05	0.000409058	17449	ENSMUSG00000020321	Mdh1	malate dehydrogenase 1, NAD (soluble)	NM_001316675
ENSMUSG00000002871	445.232	1.48299	0.423557	3.50127	0.000463042	0.00814426	24100	ENSMUSG00000002871	Tpra1	transmembrane protein, adipocyte asscociated 1	NM_011906
ENSMUSG00000015714	302.889	1.47663	0.390691	3.77955	0.000157115	0.00350967	76893	ENSMUSG00000015714	Cers2	ceramide synthase 2	NM_001320492
ENSMUSG00000033059	130.973	1.46266	0.310038	4.71767	2.38561e-06	0.000121693	110078	ENSMUSG00000033059	Pygb	brain glycogen phosphorylase	NM_153781
ENSMUSG00000003316	890.473	1.44806	0.368502	3.92959	8.50918e-05	0.00216628	20340	ENSMUSG00000003316	Glg1	golgi apparatus protein 1	NM_001368315
ENSMUSG00000026469	132.572	1.4465	0.406151	3.56149	0.00036875	0.00681241	19775	ENSMUSG00000026469	Xpr1	xenotropic and polytropic retrovirus receptor 1	NM_011273
ENSMUSG00000079020	172.992	1.43671	0.41037	3.50102	0.00046348	0.00814426	106068	ENSMUSG00000079020	Slc45a4	solute carrier family 45, member 4	NM_001033219
ENSMUSG00000045973	108.409	1.42449	0.318996	4.46554	7.98674e-06	0.000327888	230125	ENSMUSG00000045973	Slc25a51	solute carrier family 25, member 51	NM_001009949
ENSMUSG00000042726	512.506	1.41911	0.354978	3.99773	6.39517e-05	0.00174857	231712	ENSMUSG00000042726	Trafd1	TRAF type zinc finger domain containing 1	NM_001163470
ENSMUSG00000040296	105.12	1.41101	0.388945	3.62778	0.000285868	0.00565635	230073	ENSMUSG00000040296	Ddx58	DEAD (Asp-Glu-Ala-Asp) box polypeptide 58	NM_172689
ENSMUSG00000024581	139.843	1.40019	0.325574	4.30068	1.70277e-05	0.000601514	108123	ENSMUSG00000024581	Napg	N-ethylmaleimide sensitive fusion protein attachment protein gamma	NM_028017
ENSMUSG00000028898	134.183	1.38405	0.381484	3.62808	0.000285536	0.00565635	71787	ENSMUSG00000028898	Trnau1ap	tRNA selenocysteine 1 associated protein 1	NM_027925
ENSMUSG00000020064	106.987	1.38204	0.345334	4.00203	6.28012e-05	0.00172401	67345	ENSMUSG00000020064	Herc4	hect domain and RLD 4	NM_001359484
ENSMUSG00000028906	181.813	1.37205	0.300682	4.56311	5.04003e-06	0.000228153	269587	ENSMUSG00000028906	Epb41	erythrocyte membrane protein band 4.1	NM_001128606
ENSMUSG00000027195	278.768	1.36781	0.33131	4.12849	3.6516e-05	0.00110243	56348	ENSMUSG00000027195	Hsd17b12	hydroxysteroid (17-beta) dehydrogenase 12	NM_019657
ENSMUSG00000024423	68.0997	1.33735	0.350982	3.8103	0.000138798	0.00319983	16210	ENSMUSG00000024423	Impact	impact, RWD domain protein	NM_001357396
ENSMUSG00000028760	498.356	1.28457	0.321271	3.9984	6.37728e-05	0.00174717	230861	ENSMUSG00000028760	Eif4g3	eukaryotic translation initiation factor 4 gamma, 3	NM_001256195
ENSMUSG00000041236	172.895	1.26185	0.336029	3.75519	0.000173211	0.00380091	218035	ENSMUSG00000041236	Vps41	VPS41 HOPS complex subunit	NM_172120
ENSMUSG00000024104	419.509	1.26147	0.317019	3.97917	6.91563e-05	0.00183937	28006	ENSMUSG00000024104	Washc2	WASH complex subunit 2`	NM_026585
ENSMUSG00000024472	109.237	1.24533	0.330788	3.76476	0.000166711	0.00368191	70640	ENSMUSG00000024472	Dcp2	decapping mRNA 2	NM_027490
ENSMUSG00000002635	187.243	1.2277	0.258634	4.74687	2.0659e-06	0.000107387	68079	ENSMUSG00000002635	Pdcd2l	programmed cell death 2-like	NM_001360710
ENSMUSG00000034290	163.834	1.22114	0.308195	3.96224	7.42486e-05	0.00195579	217718	ENSMUSG00000034290	Nek9	NIMA (never in mitosis gene a)-related expressed kinase 9	NM_145138
ENSMUSG00000053436	482.162	1.2198	0.311843	3.9116	9.16876e-05	0.00228317	26416	ENSMUSG00000053436	Mapk14	mitogen-activated protein kinase 14	NM_001168508
ENSMUSG00000008822	65.193	1.20771	0.327051	3.69273	0.000221856	0.0045885	66204	ENSMUSG00000008822	Acyp1	acylphosphatase 1, erythrocyte (common) type	NM_001364360
ENSMUSG00000040472	162.599	1.16979	0.282159	4.14584	3.38574e-05	0.00104249	56187	ENSMUSG00000040472	Rabggta	Rab geranylgeranyl transferase, a subunit	NM_001360387
ENSMUSG00000045302	493.389	1.1533	0.315377	3.65688	0.000255301	0.00514024	50907	ENSMUSG00000045302	Preb	prolactin regulatory element binding	NM_001294302
ENSMUSG00000014554	198.322	1.14369	0.284158	4.02482	5.70193e-05	0.00159736	27369	ENSMUSG00000014554	Dguok	deoxyguanosine kinase	NM_001162521
ENSMUSG00000027189	103.667	1.12448	0.326041	3.4489	0.000562865	0.00957081	80985	ENSMUSG00000027189	Trim44	tripartite motif-containing 44	NM_020267
ENSMUSG00000030330	336.578	1.09928	0.263777	4.16747	3.08002e-05	0.00097696	28019	ENSMUSG00000030330	Ing4	inhibitor of growth family, member 4	NM_001368695
ENSMUSG00000014470	551.239	1.09799	0.318739	3.4448	0.000571489	0.00966933	68718	ENSMUSG00000014470	Rnf166	ring finger protein 166	NM_001033142
ENSMUSG00000038664	135.484	1.09419	0.266589	4.10441	4.05342e-05	0.00119944	235439	ENSMUSG00000038664	Herc1	HECT and RLD domain containing E3 ubiquitin protein ligase family member 1	NM_145617
ENSMUSG00000040701	132.454	1.06926	0.306915	3.48389	0.000494184	0.00861733	11766	ENSMUSG00000040701	Ap1g2	adaptor protein complex AP-1, gamma 2 subunit	NM_001303502
ENSMUSG00000031902	148.958	1.05706	0.270081	3.91387	9.08287e-05	0.00227005	18021	ENSMUSG00000031902	Nfatc3	nuclear factor of activated T cells, cytoplasmic, calcineurin dependent 3	NM_001368796
ENSMUSG00000054455	379.522	1.03656	0.29237	3.54536	0.00039208	0.00712737	56491	ENSMUSG00000054455	Vapb	vesicle-associated membrane protein, associated protein B and C	NM_019806
ENSMUSG00000038766	107.05	1.03011	0.287498	3.58301	0.000339657	0.00644924	213054	ENSMUSG00000038766	Gabpb2	GA repeat binding protein, beta 2	NM_029885
ENSMUSG00000021144	178.358	1.01995	0.278494	3.66239	0.000249872	0.00506825	116870	ENSMUSG00000021144	Mta1	metastasis associated 1	NM_001346696
ENSMUSG00000045410	77.2257	1.01426	0.286183	3.54408	0.000393983	0.00714342	56043	ENSMUSG00000045410	Akr1e1	aldo-keto reductase family 1, member E1	NM_018859

## Sheet: tFOLR2-MF
	baseMean	log2FoldChange	lfcSE	stat	pvalue	padj	entrez	ensembl	symbol	genename	refseq
ENSMUSG00000062591	9.48347	6.80791	0.921885	7.38477	1.52715e-13	5.3793e-11	22153	ENSMUSG00000062591	Tubb4a	tubulin, beta 4A class IVA	NM_009451
ENSMUSG00000032033	58.2579	6.27917	1.29671	4.8424	1.28283e-06	7.32278e-05	12023	ENSMUSG00000032033	Barx2	BarH-like homeobox 2	NM_013800
ENSMUSG00000028024	19.3409	6.18233	1.32726	4.65797	3.1935e-06	0.000155086	13809	ENSMUSG00000028024	Enpep	glutamyl aminopeptidase	NM_007934
ENSMUSG00000051906	775.798	5.75805	1.30411	4.41531	1.00863e-05	0.000381327	69142	ENSMUSG00000051906	Cd209f	CD209f antigen	NM_026956
ENSMUSG00000079168	342.388	5.70707	1.475	3.86921	0.000109188	0.00238923	70192	ENSMUSG00000079168	Cd209g	CD209g antigen	NM_027343
ENSMUSG00000061100	10667.9	5.58654	1.22622	4.55592	5.21561e-06	0.000228948	57262	ENSMUSG00000061100	Retnla	resistin like alpha	NM_020509
ENSMUSG00000038155	10.8716	5.34117	0.777515	6.86955	6.4407e-12	1.82385e-09	14869	ENSMUSG00000038155	Gstp2	glutathione S-transferase, pi 2	NM_181796
ENSMUSG00000031495	388.771	5.28506	1.17974	4.47985	7.46949e-06	0.000300486	170779	ENSMUSG00000031495	Cd209d	CD209d antigen	NM_130904
ENSMUSG00000026825	104.301	5.01346	1.11017	4.51595	6.30331e-06	0.000265401	13429	ENSMUSG00000026825	Dnm1	dynamin 1	NM_001301737
ENSMUSG00000065987	84.9605	4.65731	1.06747	4.36294	1.28323e-05	0.000461007	69165	ENSMUSG00000065987	Cd209b	CD209b antigen	NM_001037800
ENSMUSG00000000318	597.364	4.62167	0.967208	4.77836	1.76733e-06	9.70487e-05	17312	ENSMUSG00000000318	Clec10a	C-type lectin domain family 10, member A	NM_001204252
ENSMUSG00000078915	25.3224	4.56731	1.26523	3.60987	0.000306356	0.00514269	#N/A	ENSMUSG00000078915	#N/A	#N/A	#N/A
ENSMUSG00000022122	240.587	4.50929	1.19956	3.7591	0.000170522	0.00334604	13618	ENSMUSG00000022122	Ednrb	endothelin receptor type B	NM_001136061
ENSMUSG00000008734	24.8362	4.481	0.957106	4.68183	2.84331e-06	0.00014258	64297	ENSMUSG00000008734	Gprc5b	G protein-coupled receptor, family C, group 5, member B	NM_001195774
ENSMUSG00000017737	121.202	4.44794	0.938386	4.73999	2.13732e-06	0.000113901	17395	ENSMUSG00000017737	Mmp9	matrix metallopeptidase 9	NM_013599
ENSMUSG00000059412	1641.03	4.36687	1.0485	4.16486	3.11543e-05	0.000939312	11936	ENSMUSG00000059412	Fxyd2	FXYD domain-containing ion transport regulator 2	NM_007503
ENSMUSG00000087610	10.7401	4.29555	0.876063	4.90325	9.42649e-07	5.81784e-05	#N/A	ENSMUSG00000087610	#N/A	#N/A	#N/A
ENSMUSG00000025784	20.5304	4.27793	1.18946	3.59654	0.000322481	0.0053226	21922	ENSMUSG00000025784	Clec3b	C-type lectin domain family 3, member b	NM_011606
ENSMUSG00000043822	90.2432	4.16528	1.21243	3.43549	0.000591491	0.008198	66548	ENSMUSG00000043822	Adamtsl5	ADAMTS-like 5	NM_001113548
ENSMUSG00000024340	31.6487	4.06633	0.967245	4.20403	2.62204e-05	0.000830428	547431	ENSMUSG00000024340	Btnl2	butyrophilin-like 2	NM_079835
ENSMUSG00000007097	107.239	4.05809	1.04395	3.88727	0.00010138	0.00225251	98660	ENSMUSG00000007097	Atp1a2	ATPase, Na+/K+ transporting, alpha 2 polypeptide	NM_178405
ENSMUSG00000033327	15.8454	4.04893	1.12838	3.58826	0.000332892	0.00546942	81877	ENSMUSG00000033327	Tnxb	tenascin XB	NM_031176
ENSMUSG00000004814	626.9	3.80034	0.985965	3.85444	0.000115995	0.00250779	56221	ENSMUSG00000004814	Ccl24	chemokine (C-C motif) ligand 24	NM_001356630
ENSMUSG00000004655	91.8946	3.71601	1.04662	3.55048	0.000384536	0.00606274	11826	ENSMUSG00000004655	Aqp1	aquaporin 1	NM_007472
ENSMUSG00000031972	16.9434	3.62943	0.848586	4.27704	1.89398e-05	0.000633169	11459	ENSMUSG00000031972	Acta1	actin, alpha 1, skeletal muscle	NM_001272041
ENSMUSG00000024379	38.2019	3.49734	0.824838	4.24004	2.23481e-05	0.000730206	53603	ENSMUSG00000024379	Tslp	thymic stromal lymphopoietin	NM_021367
ENSMUSG00000019539	366.915	3.45376	0.68806	5.01957	5.17882e-07	3.56155e-05	52377	ENSMUSG00000019539	Rcn3	reticulocalbin 3, EF-hand calcium binding domain	NM_001355045
ENSMUSG00000061353	25.7363	3.3362	0.778937	4.28301	1.84382e-05	0.00061783	20315	ENSMUSG00000061353	Cxcl12	chemokine (C-X-C motif) ligand 12	NM_001012477
ENSMUSG00000028108	1746.19	3.32577	0.896191	3.71101	0.000206437	0.0038519	13601	ENSMUSG00000028108	Ecm1	extracellular matrix protein 1	NM_001252653
ENSMUSG00000017754	5153.32	3.30011	0.951891	3.4669	0.000526494	0.0075815	18830	ENSMUSG00000017754	Pltp	phospholipid transfer protein	NM_011125
ENSMUSG00000031736	16.2301	3.2737	0.741082	4.41746	9.9866e-06	0.000379604	71296	ENSMUSG00000031736	Crnde	colorectal neoplasia differentially expressed (non-protein coding)	NR_033641
ENSMUSG00000027318	245.037	3.16658	0.652323	4.85432	1.20801e-06	6.97842e-05	110751	ENSMUSG00000027318	Adam33	a disintegrin and metallopeptidase domain 33	NM_001163529
ENSMUSG00000004044	20.1841	3.16402	0.771446	4.10142	4.1063e-05	0.00116969	19285	ENSMUSG00000004044	Cavin1	caveolae associated 1	NM_001359105
ENSMUSG00000031144	16.7525	3.16007	0.793901	3.98043	6.87903e-05	0.0016669	20977	ENSMUSG00000031144	Syp	synaptophysin	NM_009305
ENSMUSG00000048772	18.4866	3.14551	0.830687	3.78664	0.0001527	0.00308432	68777	ENSMUSG00000048772	Tmem53	transmembrane protein 53	NM_001285812
ENSMUSG00000041729	130.588	3.08898	0.867685	3.56003	0.000370815	0.00588496	235431	ENSMUSG00000041729	Coro2b	coronin, actin binding protein, 2B	NM_175484
ENSMUSG00000068874	255.009	3.05818	0.66018	4.63235	3.61539e-06	0.000170632	20341	ENSMUSG00000068874	Selenbp1	selenium binding protein 1	NM_009150
ENSMUSG00000031762	1292.13	3.01393	0.794063	3.79559	0.000147296	0.00299657	17750	ENSMUSG00000031762	Mt2	metallothionein 2	NM_008630
ENSMUSG00000083899	34.577	2.9314	0.758013	3.86721	0.000110086	0.00239983	#N/A	ENSMUSG00000083899	#N/A	#N/A	#N/A
ENSMUSG00000031451	1597.13	2.90402	0.767791	3.7823	0.000155383	0.00312107	14456	ENSMUSG00000031451	Gas6	growth arrest specific 6	NM_019521
ENSMUSG00000074861	45.6642	2.86061	0.757004	3.77885	0.000157552	0.00314712	#N/A	ENSMUSG00000074861	#N/A	#N/A	#N/A
ENSMUSG00000060803	40.7784	2.85019	0.721467	3.95056	7.797e-05	0.00184725	14870	ENSMUSG00000060803	Gstp1	glutathione S-transferase, pi 1	NM_013541
ENSMUSG00000036006	18.5692	2.8473	0.767137	3.7116	0.000205956	0.0038519	193385	ENSMUSG00000036006	Ripor2	RHO family interacting cell polarization regulator 2	NM_001080381
ENSMUSG00000075702	251.3	2.67718	0.715394	3.74224	0.000182386	0.0035179	114679	ENSMUSG00000075702	Selenom	selenoprotein M	NM_053267
ENSMUSG00000085881	23.0411	2.65702	0.707472	3.75565	0.00017289	0.00337589	#N/A	ENSMUSG00000085881	#N/A	#N/A	#N/A
ENSMUSG00000032194	37.4677	2.64364	0.730846	3.61723	0.00029777	0.00502971	235041	ENSMUSG00000032194	Kank2	KN motif and ankyrin repeat domains 2	NM_145611
ENSMUSG00000039781	25.3009	2.55927	0.595341	4.29882	1.71707e-05	0.000582109	12009	ENSMUSG00000039781	Cep131	centrosomal protein 131	NM_009734
ENSMUSG00000055675	60.3417	2.55353	0.704815	3.62298	0.000291232	0.00494239	74901	ENSMUSG00000055675	Kbtbd11	kelch repeat and BTB (POZ) domain containing 11	NM_029116
ENSMUSG00000047843	257.735	2.5464	0.484744	5.25309	1.49572e-07	1.27818e-05	55950	ENSMUSG00000047843	Bri3	brain protein I3	NM_001163709
ENSMUSG00000003541	2026.04	2.54492	0.693161	3.67146	0.000241166	0.00428931	15937	ENSMUSG00000003541	Ier3	immediate early response 3	NM_133662
ENSMUSG00000030731	54.5292	2.51475	0.594537	4.22976	2.33937e-05	0.000759218	20981	ENSMUSG00000030731	Syt3	synaptotagmin III	NM_001114116
ENSMUSG00000022797	81.0482	2.4742	0.509491	4.85622	1.19647e-06	6.96397e-05	22042	ENSMUSG00000022797	Tfrc	transferrin receptor	NM_001357298
ENSMUSG00000002504	87.3562	2.36705	0.64509	3.66934	0.000243179	0.00430919	65962	ENSMUSG00000002504	Slc9a3r2	solute carrier family 9 (sodium/hydrogen exchanger), member 3 regulator 2	NM_001357796
ENSMUSG00000020439	23.3768	2.35821	0.57436	4.10581	4.02894e-05	0.00115275	29856	ENSMUSG00000020439	Smtn	smoothelin	NM_001159284
ENSMUSG00000058135	781.039	2.35579	0.66293	3.55361	0.000379981	0.00601061	14862	ENSMUSG00000058135	Gstm1	glutathione S-transferase, mu 1	NM_010358
ENSMUSG00000089989	25.1319	2.34366	0.525863	4.45678	8.32017e-06	0.000326277	#N/A	ENSMUSG00000089989	#N/A	#N/A	#N/A
ENSMUSG00000024180	78.7894	2.34267	0.535202	4.37717	1.2023e-05	0.000437372	60455	ENSMUSG00000024180	Tmem8	transmembrane protein 8	NM_021793
ENSMUSG00000001642	61.3569	2.32886	0.49425	4.7119	2.45423e-06	0.000126586	11677	ENSMUSG00000001642	Akr1b3	aldo-keto reductase family 1, member B3 (aldose reductase)	NM_009658
ENSMUSG00000038195	64.7922	2.30746	0.531633	4.34033	1.42269e-05	0.000496293	280408	ENSMUSG00000038195	Rilp	Rab interacting lysosomal protein	NM_001029938
ENSMUSG00000030717	559.53	2.29258	0.614092	3.73328	0.000189	0.00361928	56312	ENSMUSG00000030717	Nupr1	nuclear protein transcription regulator 1	NM_019738
ENSMUSG00000025875	170.77	2.29156	0.550726	4.16097	3.16893e-05	0.000951471	74257	ENSMUSG00000025875	Tspan17	tetraspanin 17	NM_028841
ENSMUSG00000024177	87.4677	2.23389	0.645681	3.45975	0.000540687	0.00770078	56520	ENSMUSG00000024177	Nme4	NME/NM23 nucleoside diphosphate kinase 4	NM_019731
ENSMUSG00000020889	74.6962	2.20064	0.411077	5.35335	8.63423e-08	8.09712e-06	217166	ENSMUSG00000020889	Nr1d1	nuclear receptor subfamily 1, group D, member 1	NM_145434
ENSMUSG00000031765	5605.95	2.16956	0.582431	3.72501	0.000195304	0.00369598	17748	ENSMUSG00000031765	Mt1	metallothionein 1	NM_013602
ENSMUSG00000034993	125.079	2.16312	0.606724	3.56524	0.000363524	0.00581397	26949	ENSMUSG00000034993	Vat1	vesicle amine transport 1	NM_012037
ENSMUSG00000030201	136.906	2.14561	0.458113	4.68357	2.81921e-06	0.000142032	16974	ENSMUSG00000030201	Lrp6	low density lipoprotein receptor-related protein 6	NM_008514
ENSMUSG00000035673	52.4223	2.13088	0.47518	4.48436	7.31346e-06	0.0002969	216161	ENSMUSG00000035673	Sbno2	strawberry notch 2	NM_001359635
ENSMUSG00000003420	2405.66	2.11892	0.578084	3.66542	0.000246935	0.00435969	14132	ENSMUSG00000003420	Fcgrt	Fc receptor, IgG, alpha chain transporter	NM_001357117
ENSMUSG00000030798	1537.69	2.11456	0.583104	3.62639	0.000287407	0.00490631	12493	ENSMUSG00000030798	Cd37	CD37 antigen	NM_001290802
ENSMUSG00000023755	19.1125	2.1115	0.571236	3.69637	0.000218706	0.00399311	69159	ENSMUSG00000023755	Rhebl1	Ras homolog enriched in brain like 1	NM_026967
ENSMUSG00000053644	173.411	2.09508	0.450303	4.65261	3.27762e-06	0.000158039	110695	ENSMUSG00000053644	Aldh7a1	aldehyde dehydrogenase family 7, member A1	NM_001127338
ENSMUSG00000063931	684.832	2.06331	0.372097	5.54508	2.93814e-08	3.34115e-06	18624	ENSMUSG00000063931	Pepd	peptidase D	NM_008820
ENSMUSG00000029455	1390.91	2.00874	0.513369	3.91287	9.12072e-05	0.00207763	11669	ENSMUSG00000029455	Aldh2	aldehyde dehydrogenase 2, mitochondrial	NM_001308450
ENSMUSG00000037966	1628.54	2.00246	0.571945	3.50114	0.000463279	0.00697672	18081	ENSMUSG00000037966	Ninj1	ninjurin 1	NM_013610
ENSMUSG00000026544	145.358	1.99985	0.45324	4.41235	1.02256e-05	0.000385492	68440	ENSMUSG00000026544	Dusp23	dual specificity phosphatase 23	NM_026725
ENSMUSG00000021895	237.777	1.98533	0.48972	4.05402	5.03456e-05	0.00133411	71704	ENSMUSG00000021895	Arhgef3	Rho guanine nucleotide exchange factor (GEF) 3	NM_001289686
ENSMUSG00000029490	53.1379	1.97869	0.482503	4.10089	4.11571e-05	0.00117006	243197	ENSMUSG00000029490	Mfsd7a	major facilitator superfamily domain containing 7A	NM_001359977
ENSMUSG00000002957	349.234	1.9541	0.465293	4.19971	2.67252e-05	0.000839054	11772	ENSMUSG00000002957	Ap2a2	adaptor-related protein complex 2, alpha 2 subunit	NM_001357068
ENSMUSG00000020021	31.0478	1.94214	0.526908	3.68591	0.000227888	0.00410285	13998	ENSMUSG00000020021	Fgd6	FYVE, RhoGEF and PH domain containing 6	NM_053072
ENSMUSG00000018340	790.911	1.93951	0.399359	4.85655	1.19451e-06	6.96397e-05	11749	ENSMUSG00000018340	Anxa6	annexin A6	NM_001110211
ENSMUSG00000055322	648.662	1.91591	0.558662	3.42947	0.000604766	0.00833399	21961	ENSMUSG00000055322	Tns1	tensin 1	NM_001289895
ENSMUSG00000020653	37.1003	1.90279	0.534189	3.56202	0.000368011	0.00586624	194655	ENSMUSG00000020653	Klf11	Kruppel-like factor 11	NM_178357
ENSMUSG00000032431	58.3548	1.86759	0.401436	4.65228	3.28291e-06	0.000158039	56693	ENSMUSG00000032431	Crtap	cartilage associated protein	NM_019922
ENSMUSG00000051343	460.912	1.86368	0.4814	3.87137	0.000108225	0.00237174	52055	ENSMUSG00000051343	Rab11fip5	RAB11 family interacting protein 5 (class I)	NM_001003955
ENSMUSG00000029007	240.656	1.86305	0.355205	5.24501	1.56275e-07	1.32761e-05	11610	ENSMUSG00000029007	Agtrap	angiotensin II, type I receptor-associated protein	NM_001301281
ENSMUSG00000031791	31.7702	1.8607	0.536566	3.4678	0.000524736	0.00757995	74166	ENSMUSG00000031791	Tmem38a	transmembrane protein 38A	NM_001357278
ENSMUSG00000055538	235.601	1.85769	0.515618	3.60284	0.000314762	0.00522705	71918	ENSMUSG00000055538	Zcchc24	zinc finger, CCHC domain containing 24	NM_001101433
ENSMUSG00000030067	392.338	1.8389	0.354838	5.18237	2.19087e-07	1.72899e-05	108655	ENSMUSG00000030067	Foxp1	forkhead box P1	NM_001197321
ENSMUSG00000003200	279.073	1.82103	0.279272	6.52063	7.00132e-11	1.68522e-08	20405	ENSMUSG00000003200	Sh3gl1	SH3-domain GRB2-like 1	NM_001252471
ENSMUSG00000040721	106.977	1.80368	0.422202	4.27207	1.93663e-05	0.00064593	239102	ENSMUSG00000040721	Zfhx2	zinc finger homeobox 2	NM_001039198
ENSMUSG00000032491	39.643	1.79511	0.498183	3.60332	0.000314177	0.00522705	67169	ENSMUSG00000032491	Nradd	neurotrophin receptor associated death domain	NM_026012
ENSMUSG00000007670	129.576	1.77994	0.377193	4.7189	2.37118e-06	0.000123182	16549	ENSMUSG00000007670	Khsrp	KH-type splicing regulatory protein	NM_010613
ENSMUSG00000020282	150.041	1.71204	0.438681	3.9027	9.5125e-05	0.00214321	13650	ENSMUSG00000020282	Rhbdf1	rhomboid 5 homolog 1	NM_001291818
ENSMUSG00000024187	498.798	1.70362	0.415677	4.09843	4.15965e-05	0.00117452	106581	ENSMUSG00000024187	Fam234a	family with sequence similarity 234, member A	NM_001206335
ENSMUSG00000069255	129.407	1.6686	0.264465	6.30933	2.80243e-10	5.70038e-08	105352	ENSMUSG00000069255	Dusp22	dual specificity phosphatase 22	NM_001037955
ENSMUSG00000037221	339.274	1.66735	0.382402	4.36019	1.29947e-05	0.00046453	68929	ENSMUSG00000037221	Mospd3	motile sperm domain containing 3	NM_001254762
ENSMUSG00000055200	35.4432	1.64829	0.356909	4.61823	3.87019e-06	0.000179721	170742	ENSMUSG00000055200	Sertad3	SERTA domain containing 3	NM_133210
ENSMUSG00000004931	79.7877	1.64231	0.267448	6.14066	8.21782e-10	1.54132e-07	57267	ENSMUSG00000004931	Apba3	amyloid beta (A4) precursor protein-binding, family A, member 3	NM_018758
ENSMUSG00000021240	154.973	1.6398	0.356218	4.60336	4.15735e-06	0.000191212	19300	ENSMUSG00000021240	Abcd4	ATP-binding cassette, sub-family D (ALD), member 4	NM_008992
ENSMUSG00000026179	85.2385	1.6347	0.486147	3.36256	0.000772238	0.00995773	56695	ENSMUSG00000026179	Pnkd	paroxysmal nonkinesiogenic dyskinesia	NM_001039509
ENSMUSG00000071637	621.881	1.61905	0.402272	4.02476	5.70331e-05	0.00147611	12609	ENSMUSG00000071637	Cebpd	CCAAT/enhancer binding protein (C/EBP), delta	NM_007679
ENSMUSG00000041571	380.194	1.60194	0.426595	3.75519	0.000173212	0.00337589	20364	ENSMUSG00000041571	Selenow	selenoprotein W	NM_009156
ENSMUSG00000038712	120.057	1.58521	0.462822	3.42509	0.000614597	0.00841327	75007	ENSMUSG00000038712	Mindy1	MINDY lysine 48 deubiquitinase 1	NM_133858
ENSMUSG00000001909	364.705	1.57122	0.239328	6.56515	5.19808e-11	1.30305e-08	212528	ENSMUSG00000001909	Trmt1	tRNA methyltransferase 1	NM_001164559
ENSMUSG00000006476	206.924	1.57034	0.30639	5.12528	2.97089e-07	2.21163e-05	56876	ENSMUSG00000006476	Nsmf	NMDA receptor synaptonuclear signaling and neuronal migration factor	NM_001039386
ENSMUSG00000058756	160.891	1.55735	0.312923	4.97678	6.46519e-07	4.26495e-05	21833	ENSMUSG00000058756	Thra	thyroid hormone receptor alpha	NM_001313983
ENSMUSG00000016520	29.6143	1.54046	0.456051	3.37784	0.000730582	0.00959188	140887	ENSMUSG00000016520	Lnx2	ligand of numb-protein X 2	NM_080795
ENSMUSG00000029560	368.191	1.51209	0.396031	3.81812	0.000134475	0.00280648	231834	ENSMUSG00000029560	Snx8	sorting nexin 8	NM_172277
ENSMUSG00000042878	348.134	1.50955	0.388771	3.88289	0.000103224	0.00228294	#N/A	ENSMUSG00000042878	#N/A	#N/A	#N/A
ENSMUSG00000026851	119.5	1.46508	0.370673	3.95248	7.73463e-05	0.00183723	227707	ENSMUSG00000026851	BC005624	cDNA sequence BC005624	NM_144885
ENSMUSG00000029402	87.2149	1.45426	0.38771	3.75091	0.000176196	0.00342479	76167	ENSMUSG00000029402	Snrnp35	small nuclear ribonucleoprotein 35 (U11/U12)	NM_029532
ENSMUSG00000056515	258.345	1.45077	0.362603	4.001	6.30749e-05	0.00156248	106572	ENSMUSG00000056515	Rab31	RAB31, member RAS oncogene family	NM_133685
ENSMUSG00000038387	339.052	1.4415	0.32222	4.47366	7.68902e-06	0.000306754	20130	ENSMUSG00000038387	Rras	related RAS viral (r-ras) oncogene	NM_001360132
ENSMUSG00000035248	398.833	1.36755	0.276639	4.94346	7.67498e-07	4.90431e-05	214290	ENSMUSG00000035248	Tut7	terminal uridylyl transferase 7	NM_001373962
ENSMUSG00000020818	200.524	1.35768	0.394185	3.44427	0.000572594	0.00805106	69900	ENSMUSG00000020818	Mfsd11	major facilitator superfamily domain containing 11	NM_001361585
ENSMUSG00000018395	99.395	1.35475	0.302068	4.48491	7.29449e-06	0.0002969	16568	ENSMUSG00000018395	Kif3a	kinesin family member 3A	NM_001290805
ENSMUSG00000056919	41.342	1.34705	0.321006	4.19633	2.71275e-05	0.000846166	382090	ENSMUSG00000056919	Cep162	centrosomal protein 162	NM_199316
ENSMUSG00000032966	807.855	1.32786	0.382453	3.47196	0.000516674	0.00752957	14225	ENSMUSG00000032966	Fkbp1a	FK506 binding protein 1a	NM_001302077
ENSMUSG00000058486	85.1057	1.32485	0.304984	4.34401	1.39903e-05	0.000490408	101240	ENSMUSG00000058486	Wdr91	WD repeat domain 91	NM_001013366
ENSMUSG00000022587	11567.2	1.32295	0.329941	4.00967	6.08048e-05	0.00153254	17069	ENSMUSG00000022587	Ly6e	lymphocyte antigen 6 complex, locus E	NM_001164036
ENSMUSG00000049643	84.5009	1.30404	0.364168	3.58087	0.000342454	0.00558208	66367	ENSMUSG00000049643	2310022A10Rik	RIKEN cDNA 2310022A10 gene	NM_001122767
ENSMUSG00000026426	324.202	1.29396	0.272702	4.74496	2.08547e-06	0.000111964	68724	ENSMUSG00000026426	Arl8a	ADP-ribosylation factor-like 8A	NM_026823
ENSMUSG00000026240	46.1824	1.29039	0.337434	3.82413	0.000131233	0.00274632	26895	ENSMUSG00000026240	Cops7b	COP9 signalosome subunit 7B	NM_001360887
ENSMUSG00000021286	48.4205	1.26746	0.370673	3.41933	0.00062775	0.00855279	68520	ENSMUSG00000021286	Zfyve21	zinc finger, FYVE domain containing 21	NM_026752
ENSMUSG00000038803	518.894	1.24386	0.344389	3.61179	0.000304089	0.00511848	67695	ENSMUSG00000038803	Ost4	oligosaccharyltransferase complex subunit 4 (non-catalytic)	NM_001134692
ENSMUSG00000002396	171.041	1.2024	0.299729	4.01163	6.03014e-05	0.00152571	77090	ENSMUSG00000002396	Ocel1	occludin/ELL domain containing 1	NM_001293800
ENSMUSG00000061731	260.06	1.20102	0.327491	3.66734	0.000245087	0.00433236	14042	ENSMUSG00000061731	Ext1	exostosin glycosyltransferase 1	NM_010162
ENSMUSG00000006782	299.593	1.19033	0.265049	4.49097	7.08983e-06	0.000292547	12799	ENSMUSG00000006782	Cnp	2',3'-cyclic nucleotide 3' phosphodiesterase	NM_001146318
ENSMUSG00000032637	674.687	1.17248	0.287719	4.07508	4.59982e-05	0.00125105	233871	ENSMUSG00000032637	Atxn2l	ataxin 2-like	NM_001347658
ENSMUSG00000068922	41.1016	1.16512	0.326965	3.56343	0.000366038	0.00584124	229524	ENSMUSG00000068922	Msto1	misato 1, mitochondrial distribution and morphology regulator	NM_144898
ENSMUSG00000079478	123.852	1.16432	0.331174	3.51572	0.000438566	0.00673089	56390	ENSMUSG00000079478	Znrd2	zinc ribbon domain containing 2	NM_020491
ENSMUSG00000028910	72.7019	1.16358	0.29068	4.00297	6.2553e-05	0.00155757	26922	ENSMUSG00000028910	Mecr	mitochondrial trans-2-enoyl-CoA reductase	NM_025297
ENSMUSG00000030522	107.942	1.15896	0.263746	4.39421	1.11175e-05	0.000413269	233315	ENSMUSG00000030522	Mtmr10	myotubularin related protein 10	NM_172742
ENSMUSG00000020773	805.357	1.15371	0.3083	3.74216	0.000182448	0.0035179	217333	ENSMUSG00000020773	Trim47	tripartite motif-containing 47	NM_001205081
ENSMUSG00000020111	281.101	1.15255	0.262779	4.38598	1.15464e-05	0.000424489	216001	ENSMUSG00000020111	Micu1	mitochondrial calcium uptake 1	NM_001291442
ENSMUSG00000031387	503.416	1.13753	0.328156	3.46644	0.000527406	0.0075815	19703	ENSMUSG00000031387	Renbp	renin binding protein	NM_001164704
ENSMUSG00000019804	1352.37	1.13452	0.311394	3.64338	0.000269083	0.00468204	54198	ENSMUSG00000019804	Snx3	sorting nexin 3	NM_017472
ENSMUSG00000029397	142.26	1.13421	0.277143	4.09251	4.26738e-05	0.00118291	68098	ENSMUSG00000029397	Rchy1	ring finger and CHY zinc finger domain containing 1	NM_001271797
ENSMUSG00000021496	230.394	1.12459	0.289941	3.87871	0.000105013	0.00231542	72562	ENSMUSG00000021496	Pcbd2	pterin 4 alpha carbinolamine dehydratase/dimerization cofactor of hepatocyte nuclear factor 1 alpha (TCF1) 2	NM_028281
ENSMUSG00000035621	266.881	1.11903	0.272423	4.10769	3.99643e-05	0.00114744	59090	ENSMUSG00000035621	Midn	midnolin	NM_001305798
ENSMUSG00000072772	238.996	1.11218	0.310443	3.58255	0.000340251	0.00556501	14790	ENSMUSG00000072772	Grcc10	gene rich cluster, C10 gene	NM_013535
ENSMUSG00000019433	144.137	1.10144	0.298463	3.69036	0.000223937	0.00406293	67903	ENSMUSG00000019433	Gipc1	GIPC PDZ domain containing family, member 1	NM_018771
ENSMUSG00000003199	220.078	1.08818	0.289535	3.75838	0.000171014	0.00335113	68047	ENSMUSG00000003199	Mpnd	MPN domain containing	NM_026530
ENSMUSG00000005656	483.173	1.08316	0.257065	4.21358	2.51352e-05	0.000801331	72183	ENSMUSG00000005656	Snx6	sorting nexin 6	NM_026998
ENSMUSG00000063714	84.1092	1.05393	0.310436	3.39501	0.000686263	0.00909267	#N/A	ENSMUSG00000063714	#N/A	#N/A	#N/A
ENSMUSG00000027679	184.843	1.04953	0.265223	3.95714	7.58534e-05	0.00180772	67713	ENSMUSG00000027679	Dnajc19	DnaJ heat shock protein family (Hsp40) member C19	NM_001026211
ENSMUSG00000037661	150.26	1.02374	0.294388	3.47752	0.000506073	0.00744268	71862	ENSMUSG00000037661	Gpr160	G protein-coupled receptor 160	NM_001134385
ENSMUSG00000028756	312.24	1.0224	0.256185	3.99087	6.58312e-05	0.00161141	68943	ENSMUSG00000028756	Pink1	PTEN induced putative kinase 1	NM_026880
ENSMUSG00000036845	158.598	1.02056	0.297	3.43624	0.000589839	0.00819083	75660	ENSMUSG00000036845	Lin37	lin-37 homolog (C. elegans)	NM_001290569

## Sheet: tCX3CR1-MF
	baseMean	log2FoldChange	lfcSE	stat	pvalue	padj	entrez	ensembl	symbol	genename	refseq
ENSMUSG00000026770	29.1812	8.83094	0.68425	12.906	4.16345e-38	5.84174e-34	16184	ENSMUSG00000026770	Il2ra	interleukin 2 receptor, alpha chain	NM_008367
ENSMUSG00000079915	7.42077	6.94236	1.23344	5.62846	1.8183e-08	6.67241e-06	#N/A	ENSMUSG00000079915	#N/A	#N/A	#N/A
ENSMUSG00000092805	37.0909	6.84259	1.22174	5.60069	2.13506e-08	7.48927e-06	#N/A	ENSMUSG00000092805	#N/A	#N/A	#N/A
ENSMUSG00000004296	30.8171	5.72186	1.46532	3.90485	9.42855e-05	0.00436607	16160	ENSMUSG00000004296	Il12b	interleukin 12b	NM_001303244
ENSMUSG00000042429	21.0822	5.45805	1.29563	4.21267	2.52372e-05	0.00191407	11539	ENSMUSG00000042429	Adora1	adenosine A1 receptor	NM_001008533
ENSMUSG00000049723	75.5572	5.06352	1.03425	4.89585	9.78812e-07	0.000169552	17381	ENSMUSG00000049723	Mmp12	matrix metallopeptidase 12	NM_001320076
ENSMUSG00000062794	11.5483	4.87014	1.14455	4.25506	2.08992e-05	0.00173099	235048	ENSMUSG00000062794	Zfp599	zinc finger protein 599	NM_181419
ENSMUSG00000041552	12.3816	4.82741	1.3487	3.5793	0.000344516	0.00968719	211612	ENSMUSG00000041552	Ptchd1	patched domain containing 1	NM_001093750
ENSMUSG00000061577	19.684	4.66006	0.771421	6.04089	1.53269e-09	7.16839e-07	382045	ENSMUSG00000061577	Adgrg5	adhesion G protein-coupled receptor G5	NM_001033468
ENSMUSG00000074264	10.1349	4.53134	1.14882	3.94435	8.00156e-05	0.00394077	11722	ENSMUSG00000074264	Amy1	amylase 1, salivary	NM_001110505
ENSMUSG00000082480	10.7713	4.43119	0.613369	7.22434	5.03533e-13	3.2114e-10	#N/A	ENSMUSG00000082480	#N/A	#N/A	#N/A
ENSMUSG00000059033	17.2601	4.26478	0.650839	6.55275	5.64879e-11	3.17033e-08	#N/A	ENSMUSG00000059033	#N/A	#N/A	#N/A
ENSMUSG00000027134	10.9005	4.08068	0.930711	4.38447	1.16267e-05	0.00117363	99010	ENSMUSG00000027134	Lpcat4	lysophosphatidylcholine acyltransferase 4	NM_207206
ENSMUSG00000040829	1062.81	4.05669	0.945639	4.2899	1.78757e-05	0.00155785	574428	ENSMUSG00000040829	Zmynd15	zinc finger, MYND-type containing 15	NM_001029929
ENSMUSG00000027399	241.61	3.94406	0.827266	4.76758	1.86452e-06	0.00026695	16175	ENSMUSG00000027399	Il1a	interleukin 1 alpha	NM_010554
ENSMUSG00000038352	205.303	3.58598	0.630136	5.6908	1.26444e-08	4.79496e-06	217151	ENSMUSG00000038352	Arl5c	ADP-ribosylation factor-like 5C	NM_207231
ENSMUSG00000000982	1089.31	3.39718	0.804882	4.22072	2.43521e-05	0.00189889	20302	ENSMUSG00000000982	Ccl3	chemokine (C-C motif) ligand 3	NM_011337
ENSMUSG00000074148	45.3724	3.23751	0.786795	4.11481	3.87505e-05	0.00255023	#N/A	ENSMUSG00000074148	#N/A	#N/A	#N/A
ENSMUSG00000074203	57.9763	3.13566	0.785064	3.99415	6.49281e-05	0.00349115	#N/A	ENSMUSG00000074203	#N/A	#N/A	#N/A
ENSMUSG00000044468	280.654	2.84744	0.774061	3.67857	0.000234548	0.00781427	74645	ENSMUSG00000044468	Tent5c	terminal nucleotidyltransferase 5C	NM_001142952
ENSMUSG00000083822	14.6031	2.59305	0.575044	4.50931	6.50392e-06	0.000724258	#N/A	ENSMUSG00000083822	#N/A	#N/A	#N/A
ENSMUSG00000084274	16.5256	2.53742	0.661261	3.83724	0.000124425	0.00519585	623796	ENSMUSG00000084274	Gm12504	prothymosin alpha pseudogene	NR_040414
ENSMUSG00000046718	1705.95	2.3679	0.504109	4.69721	2.63743e-06	0.000349111	69550	ENSMUSG00000046718	Bst2	bone marrow stromal cell antigen 2	NM_198095
ENSMUSG00000001783	339.868	2.2177	0.281192	7.8868	3.10045e-15	3.34634e-12	28088	ENSMUSG00000001783	Rtcb	RNA 2',3'-cyclic phosphate and 5'-OH ligase	NM_145422
ENSMUSG00000021660	58.8089	2.21546	0.548966	4.0357	5.44399e-05	0.00310221	218490	ENSMUSG00000021660	Btf3	basic transcription factor 3	NM_001170540
ENSMUSG00000059751	18.4162	2.19724	0.527168	4.16801	3.07274e-05	0.00218851	#N/A	ENSMUSG00000059751	#N/A	#N/A	#N/A
ENSMUSG00000070044	34.4671	2.01626	0.556608	3.62241	0.000291869	0.00896109	212326	ENSMUSG00000070044	Fam149a	family with sequence similarity 149, member A	NM_153535
ENSMUSG00000026548	567.831	1.92578	0.540198	3.56496	0.000363917	0.00991856	98365	ENSMUSG00000026548	Slamf9	SLAM family member 9	NM_029612
ENSMUSG00000020077	2374.16	1.9236	0.476213	4.03936	5.35981e-05	0.00308211	19073	ENSMUSG00000020077	Srgn	serglycin	NM_001358965
ENSMUSG00000048234	147.44	1.87615	0.487271	3.85032	0.000117963	0.00510845	67702	ENSMUSG00000048234	Rnf149	ring finger protein 149	NM_001033135
ENSMUSG00000060477	347.432	1.85202	0.373803	4.95454	7.25035e-07	0.000133855	108960	ENSMUSG00000060477	Irak2	interleukin-1 receptor-associated kinase 2	NM_001113553
ENSMUSG00000051615	296.541	1.82299	0.434846	4.19226	2.76195e-05	0.00203962	76108	ENSMUSG00000051615	Rap2a	RAS related protein 2a	NM_029519
ENSMUSG00000060739	177.922	1.80312	0.501852	3.59294	0.000326974	0.00940117	59050	ENSMUSG00000060739	Nsa2	NSA2 ribosome biogenesis homolog	NM_021552
ENSMUSG00000015839	949.42	1.79309	0.388059	4.62066	3.82513e-06	0.000462675	18024	ENSMUSG00000015839	Nfe2l2	nuclear factor, erythroid derived 2, like 2	NM_010902
ENSMUSG00000004207	3508.9	1.76134	0.467853	3.76474	0.000166721	0.00628833	19156	ENSMUSG00000004207	Psap	prosaposin	NM_001146120
ENSMUSG00000051439	3412.3	1.73817	0.487428	3.566	0.000362468	0.00991856	12475	ENSMUSG00000051439	Cd14	CD14 antigen	NM_009841
ENSMUSG00000034858	76.8663	1.72648	0.342691	5.03801	4.70407e-07	0.000100004	235493	ENSMUSG00000034858	Fam214a	family with sequence similarity 214, member A	NM_001113283
ENSMUSG00000047407	411.868	1.71723	0.479395	3.58207	0.000340879	0.00960416	21815	ENSMUSG00000047407	Tgif1	TGFB-induced factor homeobox 1	NM_001164074
ENSMUSG00000020935	359.517	1.71546	0.357712	4.79564	1.62153e-06	0.000247301	68087	ENSMUSG00000020935	Dcakd	dephospho-CoA kinase domain containing	NM_026551
ENSMUSG00000062590	34.5626	1.71396	0.406797	4.21331	2.51651e-05	0.00191407	78795	ENSMUSG00000062590	Armc9	armadillo repeat containing 9	NM_001310702
ENSMUSG00000059775	44.771	1.66759	0.458308	3.63858	0.000274149	0.00860534	#N/A	ENSMUSG00000059775	#N/A	#N/A	#N/A
ENSMUSG00000010609	269.386	1.65238	0.429985	3.84287	0.000121605	0.00516818	19165	ENSMUSG00000010609	Psen2	presenilin 2	NM_001128605
ENSMUSG00000037805	1346.55	1.61407	0.34841	4.63268	3.6097e-06	0.000453578	19896	ENSMUSG00000037805	Rpl10a	ribosomal protein L10A	NM_001357628
ENSMUSG00000061436	71.773	1.56028	0.431392	3.61686	0.000298203	0.00903692	15258	ENSMUSG00000061436	Hipk2	homeodomain interacting protein kinase 2	NM_001136065
ENSMUSG00000025362	4132.4	1.55478	0.419437	3.70682	0.000209878	0.00726162	27370	ENSMUSG00000025362	Rps26	ribosomal protein S26	NM_013765
ENSMUSG00000049882	32.3371	1.52366	0.371354	4.10298	4.07858e-05	0.00261309	207965	ENSMUSG00000049882	Vcpkmt	valosin containing protein lysine (K) methyltransferase	NM_001033236
ENSMUSG00000022139	300.601	1.52233	0.39865	3.81872	0.000134146	0.00541524	105559	ENSMUSG00000022139	Mbnl2	muscleblind like splicing factor 2	NM_001360376
ENSMUSG00000028643	251.936	1.4953	0.383394	3.90018	9.61218e-05	0.00442233	69216	ENSMUSG00000028643	Svbp	small vasohibin binding protein	NM_001038998
ENSMUSG00000004508	174.965	1.40481	0.344353	4.07957	4.51184e-05	0.00275242	14389	ENSMUSG00000004508	Gab2	growth factor receptor bound protein 2-associated protein 2	NM_001162477
ENSMUSG00000041763	173.477	1.38186	0.255311	5.41245	6.21695e-08	1.8963e-05	22019	ENSMUSG00000041763	Tpp2	tripeptidyl peptidase II	NM_001310540
ENSMUSG00000006519	4847.53	1.38068	0.362381	3.81001	0.000138962	0.00553912	13057	ENSMUSG00000006519	Cyba	cytochrome b-245, alpha polypeptide	NM_001301284
ENSMUSG00000086841	709.872	1.37523	0.367981	3.73722	0.000186069	0.00676358	69221	ENSMUSG00000086841	2410006H16Rik	RIKEN cDNA 2410006H16 gene	NR_030738
ENSMUSG00000024854	565.105	1.30508	0.297185	4.39148	1.12581e-05	0.00114465	69745	ENSMUSG00000024854	Pold4	polymerase (DNA-directed), delta 4	NM_027196
ENSMUSG00000031023	102.402	1.27884	0.25506	5.0139	5.33373e-07	0.000110055	57373	ENSMUSG00000031023	Akip1	A kinase (PRKA) interacting protein 1	NM_020616
ENSMUSG00000018585	2030.44	1.27851	0.356762	3.58365	0.000338833	0.009585	11927	ENSMUSG00000018585	Atox1	antioxidant 1 copper chaperone	NM_009720
ENSMUSG00000019659	411.01	1.24633	0.231607	5.38124	7.39738e-08	2.13646e-05	72654	ENSMUSG00000019659	Ccdc12	coiled-coil domain containing 12	NM_028312
ENSMUSG00000003444	44.5668	1.22757	0.332193	3.69535	0.000219584	0.00751459	67224	ENSMUSG00000003444	Med29	mediator complex subunit 29	NM_026042
ENSMUSG00000029614	1017.67	1.22552	0.329413	3.7203	0.000198983	0.00706816	19988	ENSMUSG00000029614	Rpl6	ribosomal protein L6	NM_011290
ENSMUSG00000031221	359.137	1.22021	0.218265	5.5905	2.26411e-08	7.74822e-06	18518	ENSMUSG00000031221	Igbp1	immunoglobulin (CD79A) binding protein 1	NM_008784
ENSMUSG00000018796	89.182	1.21848	0.286278	4.2563	2.07842e-05	0.00173099	14081	ENSMUSG00000018796	Acsl1	acyl-CoA synthetase long-chain family member 1	NM_001302163
ENSMUSG00000073563	54.6824	1.18829	0.329986	3.60104	0.000316947	0.00932146	70425	ENSMUSG00000073563	Csnk1g3	casein kinase 1, gamma 3	NM_152809
ENSMUSG00000021242	3186.52	1.18255	0.291161	4.0615	4.87585e-05	0.00289886	67963	ENSMUSG00000021242	Npc2	NPC intracellular cholesterol transporter 2	NM_023409
ENSMUSG00000074212	263.335	1.17376	0.296058	3.96465	7.35041e-05	0.00375031	70604	ENSMUSG00000074212	Dnajb14	DnaJ heat shock protein family (Hsp40) member B14	NM_001033155
ENSMUSG00000024446	330.307	1.17081	0.319924	3.65964	0.000252567	0.00817653	67676	ENSMUSG00000024446	Rpp21	ribonuclease P 21 subunit	NM_026308
ENSMUSG00000007041	2403.44	1.16524	0.271787	4.28735	1.8082e-05	0.0015661	114584	ENSMUSG00000007041	Clic1	chloride intracellular channel 1	NM_033444
ENSMUSG00000035199	318.799	1.14794	0.284779	4.03098	5.5544e-05	0.00314249	65106	ENSMUSG00000035199	Arl6ip5	ADP-ribosylation factor-like 6 interacting protein 5	NM_022992
ENSMUSG00000030579	10894.8	1.10997	0.222107	4.99746	5.80909e-07	0.000113205	22177	ENSMUSG00000030579	Tyrobp	TYRO protein tyrosine kinase binding protein	NM_011662
ENSMUSG00000044475	172.403	1.1066	0.302413	3.65925	0.000252955	0.00817653	69090	ENSMUSG00000044475	Ascc1	activating signal cointegrator 1 complex subunit 1	NM_001199187
ENSMUSG00000050552	698.561	1.09939	0.303322	3.62449	0.000289535	0.00890892	66096	ENSMUSG00000050552	Lamtor4	late endosomal/lysosomal adaptor, MAPK and MTOR activator 4	NM_001081108
ENSMUSG00000021957	1183.88	1.09929	0.306406	3.5877	0.000333602	0.00949445	21881	ENSMUSG00000021957	Tkt	transketolase	NM_009388
ENSMUSG00000034544	134.293	1.08797	0.213045	5.10676	3.27728e-07	7.42932e-05	66880	ENSMUSG00000034544	Rsrc1	arginine/serine-rich coiled-coil 1	NM_001356273
ENSMUSG00000024338	1754.89	1.0699	0.271085	3.94675	7.92199e-05	0.00394077	16913	ENSMUSG00000024338	Psmb8	proteasome (prosome, macropain) subunit, beta type 8 (large multifunctional peptidase 7)	NM_010724
ENSMUSG00000058715	5427.84	1.06647	0.274484	3.88537	0.000102176	0.00458317	14127	ENSMUSG00000058715	Fcer1g	Fc receptor, IgE, high affinity I, gamma polypeptide	NM_010185
ENSMUSG00000058655	319.973	1.06349	0.250879	4.23906	2.24459e-05	0.00178199	75705	ENSMUSG00000058655	Eif4b	eukaryotic translation initiation factor 4B	NM_145625
ENSMUSG00000043510	88.4438	1.04965	0.25871	4.05724	4.96557e-05	0.00292739	100900	ENSMUSG00000043510	Hscb	HscB iron-sulfur cluster co-chaperone	NM_001359835
ENSMUSG00000022831	1293.8	1.03039	0.205938	5.00341	5.63245e-07	0.000111308	15163	ENSMUSG00000022831	Hcls1	hematopoietic cell specific Lyn substrate 1	NM_008225
ENSMUSG00000037860	216.014	1.01242	0.272469	3.71573	0.000202621	0.00716113	383619	ENSMUSG00000037860	Aim2	absent in melanoma 2	NM_001013779

## Sheet: tLC
	baseMean	log2FoldChange	lfcSE	stat	pvalue	padj	entrez	ensembl	symbol	genename	refseq
ENSMUSG00000024459	248.677	10.1825	2.23246	4.56111	5.08829e-06	0.000531262	240095	ENSMUSG00000024459	H2-M5	histocompatibility 2, M region locus 5	NM_001115075
ENSMUSG00000021675	5.33853	8.20446	1.99209	4.11852	3.81315e-05	0.00227784	14064	ENSMUSG00000021675	F2rl2	coagulation factor II (thrombin) receptor-like 2	NM_010170
ENSMUSG00000043487	11.8463	7.87737	1.72051	4.57851	4.68309e-06	0.000493244	217700	ENSMUSG00000043487	Acot6	acyl-CoA thioesterase 6	NM_172580
ENSMUSG00000030605	2615.4	7.79999	0.859759	9.0723	1.16531e-19	1.39919e-15	17304	ENSMUSG00000030605	Mfge8	milk fat globule-EGF factor 8 protein	NM_001045489
ENSMUSG00000030792	17.0261	7.59937	1.75333	4.33424	1.46261e-05	0.00117077	50722	ENSMUSG00000030792	Dkkl1	dickkopf-like 1	NM_015789
ENSMUSG00000015981	10.2164	7.46609	1.41976	5.2587	1.45075e-07	4.35479e-05	57740	ENSMUSG00000015981	Stk32c	serine/threonine kinase 32C	NM_001162540
ENSMUSG00000044317	45.5593	7.46381	1.46101	5.10866	3.24447e-07	7.73092e-05	319197	ENSMUSG00000044317	Gpr4	G protein-coupled receptor 4	NM_175668
ENSMUSG00000051727	41.2597	7.28241	1.69172	4.30473	1.67191e-05	0.00126255	233529	ENSMUSG00000051727	Kctd14	potassium channel tetramerisation domain containing 14	NM_001010826
ENSMUSG00000031779	172.235	7.23041	1.77367	4.07653	4.57126e-05	0.00254107	20299	ENSMUSG00000031779	Ccl22	chemokine (C-C motif) ligand 22	NM_009137
ENSMUSG00000020264	78.6174	7.04675	1.81704	3.87814	0.000105257	0.00443448	246049	ENSMUSG00000020264	Slc36a2	solute carrier family 36 (proton/amino acid symporter), member 2	NM_153170
ENSMUSG00000022456	16.18	6.99975	1.91734	3.65076	0.000261467	0.00758317	24050	ENSMUSG00000022456	Sept3	septin 3	NM_001358836
ENSMUSG00000031898	49.4423	6.83654	1.78589	3.82808	0.000129145	0.00509015	71854	ENSMUSG00000031898	Dpep3	dipeptidase 3	NM_027960
ENSMUSG00000032258	19.0936	6.79778	0.801021	8.48639	2.13148e-17	1.27964e-13	75782	ENSMUSG00000032258	Lca5	Leber congenital amaurosis 5 (human)	NM_027448
ENSMUSG00000042523	36.9873	6.00853	1.35762	4.42578	9.60941e-06	0.000874092	105000	ENSMUSG00000042523	Dnal1	dynein, axonemal, light chain 1	NM_001346528
ENSMUSG00000029101	95.4019	5.85925	1.03215	5.67673	1.37298e-08	6.34051e-06	71729	ENSMUSG00000029101	Rgs12	regulator of G-protein signaling 12	NM_001163512
ENSMUSG00000025324	25.6593	5.76412	1.23269	4.67607	2.92429e-06	0.000373531	11982	ENSMUSG00000025324	Atp10a	ATPase, class V, type 10A	NM_009728
ENSMUSG00000020937	23.7919	5.63168	1.22437	4.59965	4.23202e-06	0.000466182	72469	ENSMUSG00000020937	Plcd3	phospholipase C, delta 3	NM_001361706
ENSMUSG00000001588	55.6383	5.56277	1.53338	3.62778	0.000285866	0.00811441	216859	ENSMUSG00000001588	Acap1	ArfGAP with coiled-coil, ankyrin repeat and PH domains 1	NM_153788
ENSMUSG00000022240	32.4774	5.03287	1.31895	3.81581	0.000135736	0.00520698	18163	ENSMUSG00000022240	Ctnnd2	catenin (cadherin associated protein), delta 2	NM_001355502
ENSMUSG00000026463	45.5456	4.78399	1.30027	3.67924	0.00023393	0.00716531	381290	ENSMUSG00000026463	Atp2b4	ATPase, Ca++ transporting, plasma membrane 4	NM_001167949
ENSMUSG00000024664	72.9443	4.16073	0.700673	5.9382	2.88168e-09	1.82107e-06	60527	ENSMUSG00000024664	Fads3	fatty acid desaturase 3	NM_021890
ENSMUSG00000032849	45.2586	3.60273	0.692155	5.20509	1.93906e-07	5.29142e-05	239273	ENSMUSG00000032849	Abcc4	ATP-binding cassette, sub-family C (CFTR/MRP), member 4	NM_001033336
ENSMUSG00000024399	60.2736	3.48916	0.950578	3.67057	0.000242014	0.00728929	16994	ENSMUSG00000024399	Ltb	lymphotoxin B	NM_008518
ENSMUSG00000051246	10.9	3.4296	0.913932	3.75258	0.000175025	0.00605625	403174	ENSMUSG00000051246	Msantd1	Myb/SANT-like DNA-binding domain containing 1	NM_001310550
ENSMUSG00000028937	77.1639	3.39752	0.739727	4.59294	4.37042e-06	0.000472753	70025	ENSMUSG00000028937	Acot7	acyl-CoA thioesterase 7	NM_001146057
ENSMUSG00000029821	15.182	3.37071	0.820517	4.10803	3.99048e-05	0.00232591	54722	ENSMUSG00000029821	Gsdme	gasdermin E	NM_018769
ENSMUSG00000050379	40.3211	3.35591	0.818891	4.09811	4.16536e-05	0.00241449	56526	ENSMUSG00000050379	Sept6	septin 6	NM_001177323
ENSMUSG00000057506	36.7199	3.02741	0.537281	5.63468	1.75389e-08	7.52104e-06	73689	ENSMUSG00000057506	Bloc1s2	biogenesis of lysosomal organelles complex-1, subunit 2	NM_028607
ENSMUSG00000025626	23.1342	3.02257	0.704276	4.29175	1.77272e-05	0.00131633	70998	ENSMUSG00000025626	Phf6	PHD finger protein 6	NM_001290546
ENSMUSG00000052087	152.593	2.62429	0.718622	3.65183	0.000260378	0.00756986	51791	ENSMUSG00000052087	Rgs14	regulator of G-protein signaling 14	NM_001360714
ENSMUSG00000066233	59.3707	2.53611	0.592504	4.28032	1.86625e-05	0.00136246	66079	ENSMUSG00000066233	Tmem42	transmembrane protein 42	NM_001164823
ENSMUSG00000046111	55.3924	2.50315	0.663196	3.77438	0.000160407	0.00576649	319675	ENSMUSG00000046111	Cep295	centrosomal protein 295	NM_176976
ENSMUSG00000074221	15.8744	2.42107	0.581977	4.16008	3.18132e-05	0.00199899	243905	ENSMUSG00000074221	Zfp568	zinc finger protein 568	NM_001033355
ENSMUSG00000041346	57.8613	2.37818	0.473017	5.02768	4.96448e-07	0.000101031	216853	ENSMUSG00000041346	Wrap53	WD repeat containing, antisense to Trp53	NM_001364769
ENSMUSG00000053749	28.7651	2.37425	0.635575	3.7356	0.000187268	0.00636976	100503794	ENSMUSG00000053749	Gm9920	predicted gene 9920	NR_045093
ENSMUSG00000026174	33.8261	2.29466	0.591007	3.88262	0.000103335	0.0044208	58184	ENSMUSG00000026174	Cnot9	CCR4-NOT transcription complex, subunit 9	NM_021383
ENSMUSG00000042694	48.7979	2.25247	0.596467	3.77635	0.000159144	0.00575555	108689	ENSMUSG00000042694	Stn1	STN1, CST complex subunit	NM_175360
ENSMUSG00000036398	491.088	2.24519	0.445931	5.03484	4.78249e-07	9.90058e-05	76497	ENSMUSG00000036398	Ppp1r11	protein phosphatase 1, regulatory inhibitor subunit 11	NM_029632
ENSMUSG00000026504	136.899	2.18596	0.47342	4.61738	3.88614e-06	0.000440197	76816	ENSMUSG00000026504	Sdccag8	serologically defined colon cancer antigen 8	NM_001357390
ENSMUSG00000014668	52.2207	2.16774	0.502956	4.31	1.63257e-05	0.00124065	231600	ENSMUSG00000014668	Chfr	checkpoint with forkhead and ring finger domains	NM_001289577
ENSMUSG00000071654	315.96	2.10777	0.47944	4.39631	1.10105e-05	0.000951504	107197	ENSMUSG00000071654	Uqcc3	ubiquinol-cytochrome c reductase complex assembly factor 3	NM_001160356
ENSMUSG00000028779	221.611	2.1063	0.541876	3.88706	0.000101466	0.00438239	67898	ENSMUSG00000028779	Pef1	penta-EF hand domain containing 1	NM_026441
ENSMUSG00000018102	636.404	1.99314	0.493924	4.03532	5.45284e-05	0.002897	68024	ENSMUSG00000018102	H2bc4	H2B clustered histone 4	NM_001290380
ENSMUSG00000035781	119.447	1.98705	0.520167	3.82002	0.00013344	0.00516842	109284	ENSMUSG00000035781	R3hdm4	R3H domain containing 4	NM_177994
ENSMUSG00000030269	101.287	1.96298	0.436379	4.49834	6.84863e-06	0.000659134	97287	ENSMUSG00000030269	Mtmr14	myotubularin related protein 14	NM_001362182
ENSMUSG00000028741	70.3543	1.91962	0.51892	3.69926	0.000216225	0.00685804	69902	ENSMUSG00000028741	Mrto4	mRNA turnover 4, ribosome maturation factor	NM_001290810
ENSMUSG00000028261	88.2616	1.90579	0.483438	3.94215	8.07537e-05	0.00367276	68493	ENSMUSG00000028261	Ndufaf4	NADH:ubiquinone oxidoreductase complex assembly factor 4	NM_026742
ENSMUSG00000022095	117.283	1.85974	0.471047	3.94809	7.87758e-05	0.0036247	239170	ENSMUSG00000022095	Fam160b2	family with sequence similarity 160, member B2	NM_194345
ENSMUSG00000025373	80.4194	1.81683	0.490637	3.70301	0.000213056	0.00682175	67588	ENSMUSG00000025373	Rnf41	ring finger protein 41	NM_001164237
ENSMUSG00000071078	193.03	1.7893	0.48834	3.66404	0.000248264	0.00737848	75692	ENSMUSG00000071078	Nr2c2ap	nuclear receptor 2C2-associated protein	NM_001025586
ENSMUSG00000025470	103.947	1.76064	0.411608	4.27748	1.89023e-05	0.00136246	69752	ENSMUSG00000025470	Zfp511	zinc finger protein 511	NM_027201
ENSMUSG00000029199	92.1727	1.70811	0.378765	4.50968	6.49247e-06	0.000633781	79464	ENSMUSG00000029199	Lias	lipoic acid synthetase	NM_001310612
ENSMUSG00000032601	85.489	1.63274	0.444351	3.67442	0.000238387	0.00722848	19087	ENSMUSG00000032601	Prkar2a	protein kinase, cAMP dependent regulatory, type II alpha	NM_008924
ENSMUSG00000028743	167.479	1.6282	0.453341	3.59155	0.000328718	0.00892969	110198	ENSMUSG00000028743	Akr7a5	aldo-keto reductase family 7, member A5 (aflatoxin aldehyde reductase)	NM_025337
ENSMUSG00000068479	51.9982	1.55523	0.370193	4.20114	2.65578e-05	0.00175867	67532	ENSMUSG00000068479	Mfap1a	microfibrillar-associated protein 1A	NM_026220
ENSMUSG00000015937	609.958	1.53722	0.267121	5.75479	8.67472e-09	4.33989e-06	26914	ENSMUSG00000015937	Macroh2a1	macroH2A.1 histone	NM_001159513
ENSMUSG00000026155	396.822	1.51049	0.32512	4.64595	3.38522e-06	0.000398494	98366	ENSMUSG00000026155	Smap1	small ArfGAP 1	NM_001290683
ENSMUSG00000052139	289.299	1.44668	0.315896	4.5796	4.65864e-06	0.000493244	107976	ENSMUSG00000052139	Babam2	BRISC and BRCA1 A complex member 2	NM_144541
ENSMUSG00000036672	64.6135	1.44118	0.388303	3.71148	0.000206051	0.00670361	320394	ENSMUSG00000036672	Cenpt	centromere protein T	NM_177150
ENSMUSG00000034152	297.951	1.4333	0.390075	3.67441	0.000238401	0.00722848	211446	ENSMUSG00000034152	Exoc3	exocyst complex component 3	NM_177333
ENSMUSG00000020537	177.932	1.39107	0.300605	4.62757	3.69983e-06	0.000431299	13495	ENSMUSG00000020537	Drg2	developmentally regulated GTP binding protein 2	NM_021354
ENSMUSG00000070283	147.698	1.34026	0.366901	3.65292	0.000259273	0.00756332	66706	ENSMUSG00000070283	Ndufaf3	NADH:ubiquinone oxidoreductase complex assembly factor 3	NM_023247
ENSMUSG00000033099	179.26	1.30038	0.366657	3.54658	0.000390271	0.00992793	97961	ENSMUSG00000033099	Nol12	nucleolar protein 12	NM_133800
ENSMUSG00000021595	153.486	1.25363	0.285637	4.38889	1.13932e-05	0.000977128	28114	ENSMUSG00000021595	Nsun2	NOL1/NOP2/Sun domain family member 2	NM_145354
ENSMUSG00000026239	111.246	1.25274	0.348139	3.59839	0.000320189	0.00883795	18582	ENSMUSG00000026239	Pde6d	phosphodiesterase 6D, cGMP-specific, rod, delta	NM_001360816
ENSMUSG00000038762	516.053	1.23123	0.345837	3.56013	0.000370675	0.00960834	224742	ENSMUSG00000038762	Abcf1	ATP-binding cassette, sub-family F (GCN20), member 1	NM_013854
ENSMUSG00000037364	294.683	1.15045	0.293195	3.92382	8.7155e-05	0.00386151	83701	ENSMUSG00000037364	Srrt	serrate RNA effector molecule homolog (Arabidopsis)	NM_001109909
ENSMUSG00000005625	714.84	1.13746	0.296675	3.83403	0.000126063	0.00501203	19185	ENSMUSG00000005625	Psmd4	proteasome (prosome, macropain) 26S subunit, non-ATPase, 4	NM_001282017
ENSMUSG00000024604	117.192	1.09447	0.305035	3.58802	0.000333197	0.00897016	66810	ENSMUSG00000024604	Rbm22	RNA binding motif protein 22	NM_025776
ENSMUSG00000018707	843.399	1.00024	0.243077	4.1149	3.8735e-05	0.00230243	13424	ENSMUSG00000018707	Dync1h1	dynein cytoplasmic 1 heavy chain 1	NM_030238
