# Supplementary material for: Tongue immune compartment analysis reveals spatial macrophage heterogeneity
Source: eLife. 2022 Jun 24;11:e77490. doi: 10.7554/eLife.77490 (PMC9232218; doi:10.7554/eLife.77490)
Supplement: Figure 4—source data 1. — Listed are all significant differential expressed genes between untreated and LPS-treated tFOLR2-MF (tab1) and tCX3CR1-MF (tab2). [file elife-77490-fig4-data1.xlsx]

## Sheet: tFOLR2-MF
	p_val	avg_log2FC	pct.1	pct.2	p_val_adj
2310057J18Rik	0	-0.313609	0.008	0.739	0
AW112010	0	0.984644	0.682	1	0
Adm	0	0.661062	0.202	0.993	0
Asns	0	0.267368	0.106	0.998	0
Axl	0	0.349592	0.354	1	0
Batf	0	0.308815	0.282	0.902	0
Bcl2a1a	0	0.268939	0.205	1	0
Bcl2a1b	0	0.258193	0.463	1	0
Bpifb1	0	-1.048	0.038	0.769	0
C3	0	0.397661	0.235	1	0
Ccl3	0	0.653567	0.588	1	0
Ccl4	0	1.20416	0.573	1	0
Ccl5	0	2.48394	0.754	1	0
Ccnd2	0	0.34297	0.327	1	0
Ccr1	0	-0.30485	0.298	0.99	0
Cd209a	0	0.386362	0.178	0.828	0
Cd274	0	0.415275	0.303	1	0
Cd40	0	0.275533	0.39	0.999	0
Cdc42ep2	0	0.311755	0.259	1	0
Cfb	0	0.799016	0.699	1	0
Ch25h	0	0.449755	0.114	0.899	0
Clec4e	0	1.5319	0.758	1	0
Csf3	0	0.667611	0.222	1	0
Csf3r	0	0.597992	0.53	1	0
Ctla2b	0	0.657915	0.575	1	0
Cxcl1	0	0.774126	0.397	0.994	0
Cxcl10	0	0.805631	0.335	1	0
Cxcl9	0	0.497198	0.145	1	0
Dennd4a	0	0.341056	0.54	0.957	0
Dusp16	0	0.558659	0.33	0.778	0
Dusp2	0	0.620323	0.34	0.998	0
Edn1	0	1.06826	0.309	1	0
Fabp4	0	0.477803	0.28	1	0
Fcgr4	0	0.576835	0.623	1	0
Fgl2	0	0.455098	0.569	1	0
Fnbp1l	0	0.717184	0.373	0.956	0
Fpr1	0	0.800793	0.407	1	0
Fpr2	0	1.08578	0.796	1	0
Fscn1	0	0.518394	0.177	1	0
Gadd45a	0	0.348895	0.153	0.834	0
Gadd45g	0	-0.355426	0.181	0.831	0
Gbp2	0	0.501422	0.637	1	0
Gbp5	0	0.638635	0.301	0.987	0
Gk	0	0.25448	0.174	0.976	0
Gm12840	0	0.505764	0.25	0.958	0
Gm6377	0	0.357063	0.358	1	0
Gpr84	0	0.785298	0.422	1	0
Gsr	0	0.576685	0.547	1	0
Hp	0	0.48647	0.078	0.982	0
Icam1	0	0.418213	0.619	0.997	0
Id3	0	0.677529	0.428	1	0
Ifi205	0	1.44422	0.568	1	0
Ifih1	0	0.273899	0.542	1	0
Ifit1	0	0.778673	0.58	1	0
Ifit2	0	0.277214	0.192	1	0
Ifit3	0	0.354271	0.355	1	0
Il1b	0	0.315658	0.248	0.99	0
Il6	0	0.638953	0.204	0.891	0
Isg20	0	0.310787	0.272	1	0
Itgal	0	0.336792	0.131	0.941	0
Lcn2	0	1.92633	0.542	1	0
Lipf	0	-1.8891	0.028	0.868	0
Lipg	0	0.412129	0.253	1	0
Ly6a	0	0.503115	0.301	1	0
Malt1	0	0.654989	0.256	0.916	0
Mmp13	0	0.936398	0.136	0.856	0
Mmp14	0	1.12166	0.782	1	0
Mmp19	0	0.430751	0.432	1	0
Ms4a4c	0	0.596321	0.656	1	0
Mthfd2	0	0.884121	0.414	0.999	0
Nlrp3	0	0.924468	0.671	1	0
Oas3	0	0.281154	0.36	1	0
Oasl1	0	0.516453	0.479	1	0
Palld	0	0.352951	0.432	1	0
Pde4b	0	0.336473	0.58	1	0
Pilra	0	0.29052	0.497	1	0
Plac8	0	0.426579	0.139	0.999	0
Plpp1	0	0.25158	0.265	0.999	0
Plscr1	0	0.284882	0.146	0.979	0
Ptges	0	0.363177	0.079	0.954	0
Ptgs2	0	1.23728	0.208	0.892	0
Relb	0	0.324485	0.372	0.886	0
Rsad2	0	0.605278	0.439	1	0
Sbpl	0	-1.18106	0.041	0.699	0
Sell	0	0.483754	0.22	1	0
Serpinb2	0	0.498016	0.07	0.914	0
Slamf1	0	0.369176	0.145	0.97	0
Slc15a3	0	0.497787	0.667	1	0
Slc16a3	0	0.378184	0.451	1	0
Slc7a2	0	1.09959	0.281	1	0
Slco3a1	0	0.360753	0.296	1	0
Slfn4	0	0.498208	0.289	1	0
Smim3	0	0.281733	0.275	0.996	0
Sowahc	0	0.409521	0.287	1	0
Spp1	0	-0.718359	0.016	0.911	0
Steap4	0	1.06464	0.642	1	0
Stx11	0	0.314388	0.19	0.925	0
Timp1	0	0.721565	0.241	1	0
Tnf	0	0.27793	0.462	1	0
Tnfaip2	0	1.47709	0.582	0.997	0
Tnfsf9	0	0.408197	0.531	1	0
Tnip3	0	0.611038	0.385	1	0
Traf1	0	0.44381	0.197	0.954	0
Wfdc18	0	1.45715	0.192	0.929	0
Zc3h12c	0	0.374326	0.282	0.988	0
Lrrk1	#NUM!	-0.277621	0.098	0.669	#NUM!
Ccrl2	#NUM!	0.347206	0.204	0.675	#NUM!
Mertk	1.80205e-304	-0.273403	0.386	0.931	3.6041e-301
Lyz1	1.12755e-303	-0.440491	0.155	0.725	2.2551e-300
Samsn1	1.41021e-301	0.87316	0.762	0.999	2.82043e-298
Clec4d	3.29127e-297	0.438849	0.711	1	6.58253e-294
Mpeg1	9.08054e-294	0.376669	0.556	0.941	1.81611e-290
Lacc1	7.6854e-285	0.381393	0.682	0.995	1.53708e-281
Gm26917	1.09016e-280	0.69723	0.692	1	2.18033e-277
Ccnd1	8.89778e-274	-0.381567	0.099	0.622	1.77956e-270
Pfkfb3	1.03225e-273	0.301207	0.691	1	2.06449e-270
Rnf213	8.90783e-263	0.259209	0.682	1	1.78157e-259
Il1rn	1.72325e-259	1.11142	0.832	1	3.44649e-256
Lmo4	6.0421e-257	0.601212	0.426	0.77	1.20842e-253
Hpgd	2.44967e-247	-0.391226	0.088	0.605	4.89934e-244
Gas6	1.7298e-238	-0.369496	0.251	0.784	3.4596e-235
Herpud1	7.15508e-231	0.267208	0.673	0.982	1.43102e-227
Pou2f2	9.3318e-227	0.349962	0.758	1	1.86636e-223
Mtss1	1.08068e-225	-0.341607	0.224	0.74	2.16136e-222
Prdx5	9.11799e-220	0.516019	0.776	1	1.8236e-216
Irf7	7.11432e-216	0.257151	0.739	1	1.42286e-212
Eps8	8.89631e-216	-0.463832	0.2	0.714	1.77926e-212
Nrp1	2.23706e-213	-0.518235	0.167	0.684	4.47411e-210
Tlr2	4.60105e-203	0.283173	0.761	1	9.2021e-200
Tnfaip3	3.83501e-192	0.519145	0.836	1	7.67003e-189
Igf1	1.90542e-185	-0.434507	0.188	0.664	3.81083e-182
Dok2	5.49945e-185	-0.414036	0.516	0.943	1.09989e-181
Ednrb	2.00291e-183	-0.350936	0.196	0.655	4.00582e-180
Rnase4	2.5722e-183	-0.352248	0.441	0.895	5.1444e-180
Fgfr1	2.43412e-181	-0.339715	0.24	0.711	4.86824e-178
Tppp3	2.55766e-180	-0.384453	0.245	0.721	5.11532e-177
Wwp1	1.41792e-176	-0.320712	0.289	0.752	2.83584e-173
Rab7b	4.9328e-176	-0.517264	0.239	0.713	9.86559e-173
Cd38	1.52428e-175	0.524773	0.837	1	3.04855e-172
Tmem37	1.78079e-172	-0.398869	0.174	0.626	3.56159e-169
Clec4a2	5.2624e-172	-0.253313	0.374	0.797	1.05248e-168
Blvrb	9.87432e-167	-0.347885	0.263	0.721	1.97486e-163
Timp2	1.81583e-166	-0.259366	0.501	0.916	3.63166e-163
Cfp	1.6672e-163	-0.283409	0.625	0.976	3.33439e-160
Ifi203	2.39671e-155	0.269612	0.622	0.901	4.79342e-152
Tubb5	5.79758e-154	-0.326227	0.685	0.996	1.15952e-150
Emp1	1.38677e-152	-0.405498	0.211	0.648	2.77355e-149
Sulf2	5.83304e-141	-0.42512	0.19	0.61	1.16661e-137
Isg15	2.09404e-140	0.299431	0.837	1	4.18808e-137
Cd81	1.48095e-138	-0.311285	0.53	0.913	2.9619e-135
Zfhx3	1.48633e-133	-0.408589	0.243	0.655	2.97265e-130
Lmna	1.0244e-129	-0.333907	0.297	0.701	2.0488e-126
Tmem176a	3.25479e-129	0.30444	0.824	0.988	6.50958e-126
Marcksl1	5.19951e-129	0.749494	0.938	1	1.0399e-125
Sec61b	1.67416e-121	-0.263808	0.592	0.915	3.34831e-118
Cp	7.14725e-120	0.502346	0.918	1	1.42945e-116
Kctd12	5.85754e-110	-0.254813	0.455	0.812	1.17151e-106
Fxyd2	2.63936e-109	-0.278895	0.436	0.793	5.27872e-106
Neat1	3.12271e-108	-0.372688	0.443	0.811	6.24541e-105
Folr2	4.97286e-107	-0.336331	0.609	0.934	9.94571e-104
Rin2	5.50675e-106	-0.29212	0.765	0.997	1.10135e-102
Ctsd	8.10068e-101	-0.702658	0.475	0.835	1.62014e-97
Trf	7.12795e-99	-0.335617	0.531	0.87	1.42559e-95
Lgals1	1.74305e-97	-0.628158	0.561	0.895	3.48609e-94
Pim1	1.70586e-93	0.352444	0.488	0.68	3.41172e-90
Lyve1	1.58432e-88	-0.691925	0.66	0.942	3.16864e-85
Dusp6	5.77596e-84	-0.340648	0.338	0.661	1.15519e-80
Fcna	5.94387e-83	-0.312417	0.366	0.69	1.18877e-79
Saa3	3.07096e-82	2.50262	0.907	1	6.14192e-79
Hmox1	3.13779e-81	-0.408707	0.824	0.999	6.27558e-78
Pf4	5.34681e-79	-0.599494	0.837	0.96	1.06936e-75
Pltp	2.09029e-78	-0.363602	0.713	0.961	4.18058e-75
Lrp1	2.79479e-76	-0.438751	0.299	0.625	5.58957e-73
Ms4a7	5.11308e-75	-0.26108	0.336	0.639	1.02262e-71
Tuba1b	1.19076e-73	-0.328797	0.837	1	2.38152e-70
Ninj1	1.62005e-73	-0.251817	0.762	0.967	3.24009e-70
Cybb	1.91065e-71	0.452984	0.972	1	3.82129e-68
Hmgb2	2.00669e-70	-0.27155	0.429	0.685	4.01337e-67
Irf8	1.74627e-69	-0.258949	0.358	0.643	3.49254e-66
Aif1	3.92068e-69	-0.412017	0.449	0.744	7.84136e-66
Hmgb1	3.1145e-66	-0.309804	0.517	0.803	6.229e-63
Maf	9.99891e-66	-0.465218	0.82	0.983	1.99978e-62
S100a4	1.24445e-63	-0.538392	0.572	0.85	2.48889e-60
Retnla	1.9485e-62	-1.12253	0.657	0.902	3.89699e-59
S100a10	5.12003e-62	-0.484011	0.749	0.955	1.02401e-58
Cbr2	1.71419e-60	-0.321558	0.656	0.903	3.42837e-57
Hsp90aa1	4.96832e-60	-0.302442	0.885	0.999	9.93665e-57
Stab1	9.19911e-60	-0.427936	0.584	0.852	1.83982e-56
Ftl1	3.58047e-57	-0.312998	0.867	0.993	7.16093e-54
Crip1	9.07869e-56	-0.400575	0.849	0.965	1.81574e-52
Ifi27l2a	1.39558e-55	-0.705958	0.907	1	2.79115e-52
H2-Aa	5.45047e-55	-0.252712	0.739	0.889	1.09009e-51
S100a6	1.41236e-52	-0.56694	0.675	0.883	2.82472e-49
Cd68	3.5505e-52	-0.469514	0.5	0.767	7.10101e-49
Capg	4.49315e-51	-0.37378	0.533	0.787	8.9863e-48
Bst2	3.33382e-50	-0.256865	0.904	1	6.66765e-47
F13a1	6.71256e-50	-0.439803	0.915	0.997	1.34251e-46
Klf4	4.3298e-41	-0.344321	0.697	0.882	8.6596e-38
C1qc	8.91052e-39	-0.269888	0.963	0.992	1.7821e-35
Ccl6	1.03867e-38	-0.332307	0.786	0.946	2.07733e-35
Lyz2	1.43576e-31	-0.295851	0.955	0.995	2.87153e-28
Dab2	2.94111e-30	-0.336815	0.828	0.941	5.88223e-27
Mrc1	5.22295e-30	-0.359479	0.929	0.996	1.04459e-26
Cd74	3.74988e-26	-0.28727	0.925	0.976	7.49977e-23
Mafb	2.29129e-24	-0.27394	0.897	0.974	4.58258e-21
Hspa1b	6.98148e-16	-0.311232	0.794	0.895	1.3963e-12
Mt2	1.46651e-15	-0.498371	0.968	1	2.93303e-12
Ctss	4.49486e-15	-0.265528	0.923	0.983	8.98971e-12
Mt1	7.0483e-11	-0.548435	0.982	1	1.40966e-07
Fth1	7.10384e-08	0.256854	0.995	1	0.000142077
Gm42418	0.0511735	0.285157	1	1	1

## Sheet: tCX3CR1-MF
	p_val	avg_log2FC	pct.1	pct.2	p_val_adj
Zfp811	1.77659e-167	0.265558	0.158	0.994	3.55318e-164
Edn1	2.16604e-147	0.331348	0.166	1	4.33208e-144
Trim30b	3.59265e-142	0.288904	0.204	0.965	7.18531e-139
Il12b	1.1842e-140	0.986362	0.154	0.983	2.36841e-137
Ccl8	7.74118e-132	-0.734641	0.057	0.977	1.54824e-128
Cd24a	1.1982e-127	-0.2788	0.101	0.994	2.3964e-124
Slco3a1	1.22662e-127	0.393509	0.315	1	2.45325e-124
C3	3.11826e-120	0.303449	0.291	1	6.23652e-117
Slc5a3	7.31903e-116	0.45731	0.293	1	1.46381e-112
Gbp5	1.30058e-114	0.857534	0.386	1	2.60116e-111
Ifi205	7.07293e-114	0.427419	0.349	1	1.41459e-110
Clec4e	1.7709e-110	0.325144	0.309	1	3.5418e-107
Cmpk2	1.33672e-109	0.737823	0.384	1	2.67344e-106
Lcn2	3.91253e-108	0.259697	0.25	1	7.82506e-105
Ptgs2	8.56995e-108	0.932237	0.303	0.988	1.71399e-104
Ifit3b	1.59385e-107	0.638263	0.412	1	3.18769e-104
Zc3h12c	1.42593e-106	0.302516	0.366	1	2.85185e-103
Ctla2b	3.29656e-105	0.277897	0.384	0.988	6.59313e-102
Dnase1l3	1.39633e-104	0.540297	0.36	0.994	2.79267e-101
Ezh2	3.30257e-101	-0.260111	0.105	0.913	6.60515e-98
Fpr2	2.65641e-96	0.44579	0.414	1	5.31281e-93
F13a1	1.23056e-94	-0.292792	0.147	0.924	2.46111e-91
Id3	2.32545e-94	0.383908	0.335	0.994	4.65089e-91
Tff2	9.63292e-94	0.263974	0.067	0.68	1.92658e-90
Ly6a	6.37189e-89	-0.272432	0.277	1	1.27438e-85
Igtp	6.92846e-88	0.283368	0.473	1	1.38569e-84
Slfn9	4.29407e-87	0.367068	0.495	1	8.58814e-84
Gbp7	1.98659e-83	0.519804	0.489	1	3.97318e-80
Traf1	3.42869e-83	0.417323	0.436	1	6.85738e-80
Gpr84	9.73474e-82	0.327665	0.442	1	1.94695e-78
Phf11a	9.85834e-82	0.294846	0.495	1	1.97167e-78
Dusp16	4.84844e-80	0.263006	0.453	0.994	9.69688e-77
Ccl2	1.11201e-79	0.272984	0.376	0.994	2.22402e-76
Isg20	9.87338e-79	0.385941	0.531	1	1.97468e-75
Cxcl9	4.15312e-78	0.977395	0.455	1	8.30624e-75
Cfp	1.47077e-77	-0.332668	0.289	0.977	2.94155e-74
Usp18	4.16526e-77	0.614037	0.592	1	8.33053e-74
Gbp2	3.75166e-75	0.750143	0.59	1	7.50333e-72
Ifi47	6.77711e-73	0.468769	0.596	1	1.35542e-69
Ifit1	2.66432e-72	0.825307	0.59	1	5.32865e-69
Cd40	3.72154e-67	0.779162	0.574	0.994	7.44308e-64
Chka	6.18993e-66	0.32665	0.499	0.971	1.23799e-62
Clec12a	1.01072e-65	-0.315696	0.352	0.971	2.02143e-62
Rsad2	6.73182e-65	1.2836	0.6	1	1.34636e-61
Irgm1	2.9807e-64	0.438488	0.648	1	5.96139e-61
Mt2	1.14077e-62	0.465822	0.497	1	2.28155e-59
Lyz1	4.20183e-61	-0.557191	0.091	0.721	8.40367e-58
Gbp3	7.72889e-61	0.529878	0.507	0.913	1.54578e-57
Ddit4	2.67766e-60	0.387274	0.572	1	5.35531e-57
Ecm1	8.98694e-60	-0.317425	0.224	0.849	1.79739e-56
Fnbp1l	2.70135e-57	0.54634	0.648	1	5.4027e-54
Ifit3	4.81883e-57	0.8093	0.673	1	9.63766e-54
Tnfaip2	2.08191e-55	0.517773	0.578	1	4.16382e-52
Ifit2	2.06074e-52	0.966779	0.715	1	4.12148e-49
Pfkfb3	4.38573e-52	0.426959	0.547	0.907	8.77147e-49
Pltp	1.92965e-51	-0.378802	0.194	0.791	3.8593e-48
Malt1	4.69682e-51	0.462458	0.604	1	9.39363e-48
Lipf	7.09909e-50	-0.337291	0.497	1	1.41982e-46
Col14a1	9.25451e-49	-0.354145	0.42	0.965	1.8509e-45
Mtss1	1.27115e-48	-0.273769	0.404	0.942	2.5423e-45
Ass1	1.04413e-47	0.308394	0.675	1	2.08826e-44
Capg	4.09654e-46	-0.336832	0.236	0.785	8.19308e-43
Mthfd2	2.72728e-45	0.396356	0.685	1	5.45456e-42
Lmo4	3.48412e-44	0.305033	0.588	0.965	6.96824e-41
Cxcl10	6.90833e-44	0.747668	0.667	1	1.38167e-40
Sbpl	8.42636e-43	-0.59646	0.539	1	1.68527e-39
Acp5	1.91552e-40	0.298792	0.671	1	3.83104e-37
Il1rn	4.24731e-40	0.62117	0.723	1	8.49462e-37
Oas3	9.24376e-40	0.451419	0.762	1	1.84875e-36
Rasa4	1.27486e-39	0.295335	0.703	0.994	2.54972e-36
Bcl2l11	2.25672e-38	0.320035	0.509	0.884	4.51344e-35
Gm26917	3.73879e-38	0.652667	0.719	1	7.47757e-35
Phf11d	7.43553e-38	0.268324	0.735	1	1.48711e-34
Ifih1	1.01242e-37	0.444514	0.749	1	2.02485e-34
Hsph1	1.56932e-37	0.288805	0.65	0.994	3.13864e-34
Oasl1	9.28543e-37	0.774617	0.764	1	1.85709e-33
Plau	9.28568e-30	-0.264681	0.295	0.733	1.85714e-26
S100a4	3.75661e-29	-0.520101	0.242	0.698	7.51322e-26
Ccl5	1.8706e-27	1.83429	0.808	1	3.74121e-24
Anxa2	2.08673e-26	-0.298383	0.356	0.773	4.17346e-23
S100a10	3.1076e-26	-0.445254	0.358	0.791	6.2152e-23
Gadd45b	3.1999e-25	-0.46315	0.721	1	6.3998e-22
Tmem119	3.30787e-25	-0.295387	0.693	1	6.61574e-22
Lacc1	4.39121e-25	0.422386	0.846	1	8.78242e-22
Ifi203	5.66373e-25	0.541957	0.857	1	1.13275e-21
Ppp1r15a	3.3532e-24	0.301924	0.634	0.901	6.7064e-21
Sdf2l1	6.8688e-24	-0.251927	0.337	0.738	1.37376e-20
S100a6	3.29971e-23	-0.505641	0.297	0.715	6.59942e-20
C5ar1	1.44212e-22	-0.351784	0.709	1	2.88424e-19
Fgl2	3.23303e-22	0.56964	0.844	1	6.46606e-19
Parp14	2.32572e-21	0.55677	0.901	1	4.65144e-18
Slamf7	8.01399e-21	0.35279	0.762	0.953	1.6028e-17
Itgal	5.25899e-19	0.256294	0.826	0.994	1.0518e-15
Saa3	1.83159e-18	2.199	0.83	1	3.66318e-15
Cd33	2.49092e-17	-0.268493	0.485	0.826	4.98183e-14
Tmsb10	3.59171e-17	-0.255978	0.566	0.878	7.18342e-14
Ntpcr	9.70016e-17	-0.270078	0.432	0.779	1.94003e-13
Dst	3.79446e-16	0.263615	0.899	1	7.58891e-13
Prkcb	3.86838e-16	0.260816	0.703	0.872	7.73676e-13
Sec61b	4.03874e-16	-0.273469	0.739	0.983	8.07748e-13
Ctsl	6.69471e-15	-0.293353	0.588	0.89	1.33894e-11
Mndal	2.03688e-14	0.321803	0.905	1	4.07377e-11
Ms4a4c	3.99666e-14	0.447985	0.895	1	7.99332e-11
Ccl3	2.89718e-13	-0.39841	0.832	1	5.79435e-10
Retnla	6.12585e-12	-1.41286	0.354	0.663	1.22517e-08
Isg15	1.12365e-11	0.276855	0.909	1	2.2473e-08
Ccl4	4.09989e-11	-0.678558	0.846	1	8.19978e-08
Lsp1	4.23104e-11	0.344368	0.651	0.756	8.46208e-08
Ifi204	5.48735e-11	0.317083	0.945	1	1.09747e-07
Nr4a1	9.35019e-11	-0.298397	0.402	0.674	1.87004e-07
Rgs2	1.40628e-10	0.313617	0.657	0.802	2.81256e-07
Pkib	2.13091e-10	0.253544	0.584	0.727	4.26183e-07
Lgals3	6.03207e-10	0.426787	0.55	0.721	1.20641e-06
Gpr183	2.6923e-09	-0.34574	0.446	0.715	5.38459e-06
Hmgb2	2.79643e-09	-0.289795	0.667	0.884	5.59287e-06
Rnf213	6.24132e-09	0.254317	0.935	1	1.24826e-05
Ifi27l2a	3.41778e-08	-0.618434	0.895	1	6.83556e-05
Il1b	1.12994e-07	-0.27138	0.683	0.89	0.000225987
Dusp1	2.10619e-07	0.355624	0.927	0.994	0.000421239
Lyz2	5.66573e-07	-0.599289	0.929	0.994	0.00113315
Ctsd	1.94754e-06	-0.261576	0.618	0.814	0.00389508
AY036118	5.191e-06	0.280107	0.545	0.616	0.010382
AW112010	7.74536e-05	0.336409	0.968	1	0.154907
Cebpb	0.00071748	-0.253772	0.95	1	1
Ifitm3	0.00368555	-0.352787	0.964	1	1
Cd14	0.0212983	-0.295782	0.901	0.959	1
Sdc4	0.367682	-0.419369	0.992	1	1
